# Supplementary material for: The functional organization of excitation and inhibition in the dendrites of mouse direction-selective ganglion cells
Source: eLife. 2020 Feb 25;9:e52949. doi: 10.7554/eLife.52949 (PMC7069718; doi:10.7554/eLife.52949)
Supplement: Figure 1—source data 1. [file elife-52949-fig1-data1.xlsx]

## Sheet: Sheet1
	IPSC		EPSC		Spiking				Tuning Curves
Time	PD	ND	PD	ND	Time	PD	ND		Direction (deg)	IPSC	EPSC	Spiking
0.2	7.67675e-11	2.91854e-11	1.14383e-11	1.03962e-11	0	4.78277e-13	-3.91923e-13		0	3.0926e-10	-8.06141e-10	72
0.2001	7.79212e-11	2.59874e-11	1.47332e-11	8.07575e-12	0.0001	-1.47551e-12	-1.36902e-12		45	3.36296e-10	-7.47299e-10	61
0.2002	7.83019e-11	2.55971e-11	2.02255e-11	6.73185e-12	0.0002	-6.2303e-13	-8.82346e-13		90	1.11164e-09	-7.06806e-10	32
0.2003	7.69329e-11	2.4515e-11	2.14452e-11	6.85279e-12	0.0003	-3.82226e-13	8.23996e-13		135	1.31927e-09	-7.58435e-10	14
0.2004	7.51163e-11	2.23344e-11	1.99794e-11	8.43859e-12	0.0004	-1.42771e-13	1.18655e-12		180	1.8449e-09	-6.73159e-10	4
0.2005	7.2079e-11	2.30426e-11	1.92461e-11	1.22216e-11	0.0005	-1.36953e-12	-1.62568e-12		225	1.70392e-09	-6.11526e-10	9
0.2006	7.19306e-11	2.53785e-11	1.7292e-11	9.77911e-12	0.0006	-1.13285e-12	-2.8519e-12		270	1.04168e-09	-6.145e-10	36
0.2007	6.96664e-11	2.45813e-11	1.81455e-11	8.19107e-12	0.0007	-4.31339e-14	-5.29963e-12		315	4.54037e-10	-6.12785e-10	67
0.2008	6.62222e-11	2.21565e-11	1.82667e-11	1.11196e-11	0.0008	1.90617e-13	-4.33012e-12		360	3.0926e-10	-8.06141e-10	72
0.2009	6.66843e-11	1.76565e-11	1.85099e-11	1.08744e-11	0.0009	5.67098e-14	-2.62882e-12
0.201	6.97912e-11	1.926e-11	1.93634e-11	1.44133e-11	0.001	7.75861e-13	-3.00329e-12
0.2011	6.86256e-11	2.05379e-11	1.63107e-11	1.56329e-11	0.0011	1.61569e-12	-2.4017e-12			IPSC	EPSC	Spiking
0.2012	6.55476e-11	2.10835e-11	1.52111e-11	1.38007e-11	0.0012	1.4776e-12	-2.28882e-12		DSI	0.385	-0.057	0.482
0.2013	6.61724e-11	2.23208e-11	1.63088e-11	1.50203e-11	0.0013	1.17513e-13	-3.4525e-13		Angle	185.234	246.61	358.105
0.2014	7.09476e-11	2.4087e-11	1.85052e-11	1.55074e-11	0.0014	7.09334e-13	2.9408e-12
0.2015	6.88462e-11	2.94747e-11	2.18001e-11	1.53842e-11	0.0015	3.00897e-12	1.23079e-13
0.2016	6.51578e-11	2.96133e-11	2.19212e-11	1.57493e-11	0.0016	2.86614e-12	-1.3133e-13
0.2017	6.22426e-11	2.6985e-11	2.25306e-11	1.58703e-11	0.0017	8.91243e-13	8.34854e-13
0.2018	6.37626e-11	2.38278e-11	2.19193e-11	1.48926e-11	0.0018	8.68548e-13	1.55685e-12
0.2019	6.70729e-11	2.24202e-11	2.10639e-11	1.33045e-11	0.0019	-7.41909e-13	-1.62564e-13
0.202	6.90405e-11	2.20706e-11	1.82553e-11	1.56228e-11	0.002	-1.13243e-12	-7.8327e-13
0.2021	7.07639e-11	2.17209e-11	1.26392e-11	1.47671e-11	0.0021	-1.03537e-12	6.09807e-14
0.2022	7.28129e-11	1.98658e-11	1.14175e-11	5.48867e-12	0.0022	-8.16893e-13	-1.78014e-12
0.2023	7.27053e-11	2.2161e-11	1.48345e-11	1.94751e-12	0.0023	-2.32804e-13	5.29338e-13
0.2024	7.35335e-11	2.291e-11	1.33688e-11	2.55673e-12	0.0024	-1.54573e-14	7.63856e-13
0.2025	7.54197e-11	2.45135e-11	1.0194e-11	1.06122e-11	0.0025	1.66628e-12	-8.32444e-13
0.2026	7.6899e-11	2.46114e-11	1.20241e-11	1.04891e-11	0.0026	3.95797e-12	-1.69606e-12
0.2027	7.72796e-11	2.73949e-11	2.13005e-11	5.72719e-12	0.0027	1.97684e-12	-3.16972e-12
0.2028	7.46899e-11	2.95274e-11	3.66804e-11	3.16259e-12	0.0028	1.82643e-12	-2.20163e-12
0.2029	7.35651e-11	2.64515e-11	2.98435e-11	1.0974e-11	0.0029	6.99166e-13	1.20821e-12
0.203	6.99988e-11	2.52067e-11	2.08094e-11	3.13586e-11	0.003	5.48213e-13	2.42116e-12
0.2031	6.67173e-11	2.45315e-11	1.54373e-11	3.35547e-11	0.0031	1.61776e-12	1.19309e-12
0.2032	6.75456e-11	2.53619e-11	1.66571e-11	2.14686e-11	0.0032	2.56511e-12	2.28474e-12
0.2033	6.96352e-11	2.41578e-11	1.79989e-11	1.26785e-11	0.0033	5.82686e-13	-1.75013e-12
0.2034	7.13993e-11	1.63619e-11	1.90966e-11	8.77108e-12	0.0034	-2.01011e-12	-2.24451e-12
0.2035	7.30821e-11	1.59309e-11	1.72646e-11	1.30424e-11	0.0035	-8.18689e-13	-2.00602e-12
0.2036	7.24455e-11	1.93247e-11	1.4334e-11	1.52386e-11	0.0036	2.50775e-13	-1.64502e-12
0.2037	7.14834e-11	2.32882e-11	1.51875e-11	1.65802e-11	0.0037	-3.8857e-13	-1.28359e-12
0.2038	6.93413e-11	2.29386e-11	1.62852e-11	1.41377e-11	0.0038	6.81327e-13	1.1535e-12
0.2039	6.70364e-11	2.44607e-11	2.00685e-11	1.07186e-11	0.0039	1.50741e-12	5.39251e-13
0.204	6.70915e-11	2.54538e-11	2.22648e-11	7.54364e-12	0.004	1.47942e-12	-2.02769e-12
0.2041	6.41356e-11	2.46973e-11	2.51935e-11	7.42044e-12	0.0041	1.81812e-12	-8.10032e-13
0.2042	5.97962e-11	2.47953e-11	2.28733e-11	1.3767e-11	0.0042	9.36649e-13	7.74243e-13
0.2043	6.11127e-11	2.50967e-11	1.87219e-11	1.55969e-11	0.0043	-4.32521e-13	6.49902e-13
0.2044	6.19817e-11	2.64967e-11	1.76223e-11	1.27882e-11	0.0044	-4.58276e-13	-1.54931e-12
0.2045	6.19961e-11	2.46415e-11	1.90862e-11	1.01015e-11	0.0045	-1.33782e-12	-2.28337e-12
0.2046	6.41671e-11	2.13622e-11	1.89632e-11	1.10769e-11	0.0046	-1.24002e-12	-2.65093e-12
0.2047	6.51581e-11	2.01988e-11	1.83519e-11	1.29069e-11	0.0047	1.30002e-12	-3.26229e-12
0.2048	6.42367e-11	1.91574e-11	1.71303e-11	1.3394e-11	0.0048	7.89241e-13	-2.77461e-12
0.2049	6.42105e-11	2.12899e-11	1.39555e-11	1.44915e-11	0.0049	-2.52815e-12	-5.77476e-13
0.205	6.82939e-11	2.30968e-11	1.77387e-11	1.40021e-11	0.005	-1.32784e-12	-8.2123e-13
0.2051	7.1116e-11	2.16079e-11	1.96909e-11	1.33906e-11	0.0051	3.61922e-13	-2.89548e-12
0.2052	7.32463e-11	1.95085e-11	2.76246e-11	1.32675e-11	0.0052	3.76192e-12	-2.89392e-12
0.2053	7.62312e-11	1.98913e-11	2.79898e-11	1.19236e-11	0.0053	4.72182e-12	-2.89169e-12
0.2054	7.99484e-11	2.15762e-11	2.56695e-11	1.39976e-11	0.0054	7.26997e-12	-2.40045e-12
0.2055	8.3625e-11	2.29762e-11	2.4692e-11	1.70483e-11	0.0055	8.11053e-12	-2.27464e-12
0.2056	8.49008e-11	2.05107e-11	2.11511e-11	1.58264e-11	0.0056	4.68008e-12	-1.53766e-12
0.2057	8.71125e-11	1.78417e-11	1.9197e-11	1.44825e-11	0.0057	2.74543e-13	5.46499e-14
0.2058	9.02194e-11	1.55797e-11	2.05388e-11	1.10634e-11	0.0058	1.36372e-12	1.52572e-12
0.2059	9.62153e-11	1.77121e-11	2.05379e-11	8.74299e-12	0.0059	1.47792e-12	2.63145e-12
0.206	9.78167e-11	1.93156e-11	1.80955e-11	9.96257e-12	0.006	-3.59351e-13	1.41879e-12
0.2061	9.66511e-11	1.9495e-11	1.44325e-11	1.16704e-11	0.0061	-1.70657e-12	3.29196e-13
0.2062	9.28814e-11	1.8657e-11	1.63846e-11	1.33783e-11	0.0062	-1.58714e-12	2.65869e-12
0.2063	9.17972e-11	1.89991e-11	2.32196e-11	1.19123e-11	0.0063	-1.832e-12	1.08309e-12
0.2064	8.94516e-11	1.82833e-11	2.83456e-11	4.70905e-12	0.0064	-2.31907e-12	-6.13356e-13
0.2065	8.84082e-11	1.5655e-11	2.63916e-11	-1.15145e-12	0.0065	-6.06889e-13	-5.99518e-13
0.2066	8.33364e-11	1.68109e-11	2.01651e-11	8.00552e-13	0.0066	4.96957e-13	-1.31671e-12
0.2067	7.81017e-11	1.95944e-11	1.67461e-11	5.31603e-12	0.0067	1.96906e-12	7.75124e-13
0.2068	7.8401e-11	2.00179e-11	1.73555e-11	2.8735e-12	0.0068	3.5653e-12	2.74634e-12
0.2069	7.95955e-11	1.95462e-11	2.38243e-11	2.99444e-12	0.0069	3.57666e-12	1.91141e-12
0.207	8.35569e-11	1.822e-11	2.35792e-11	3.11539e-12	0.007	3.22381e-12	-9.97212e-13
0.2071	8.48734e-11	1.74228e-11	2.11369e-11	6.41017e-12	0.0071	5.19224e-12	-1.70705e-12
0.2072	8.44403e-11	1.69103e-11	2.1258e-11	8.72838e-12	0.0072	2.40183e-12	-1.31674e-12
0.2073	8.25423e-11	1.52586e-11	2.18674e-11	7.87276e-12	0.0073	2.23641e-13	-4.36617e-13
0.2074	8.0685e-11	1.51531e-11	2.56507e-11	7.6275e-12	0.0074	2.93009e-12	4.45059e-13
0.2075	8.10656e-11	1.81401e-11	2.49173e-11	8.96915e-12	0.0075	3.19694e-12	-2.21177e-12
0.2076	8.31146e-11	1.79125e-11	2.47943e-11	1.2386e-11	0.0076	1.75655e-12	-2.05945e-12
0.2077	8.04842e-11	1.5976e-11	2.29623e-11	1.10421e-11	0.0077	1.90478e-12	-9.29056e-13
0.2078	7.71621e-11	1.62774e-11	1.44164e-11	1.01865e-11	0.0078	1.44434e-12	-5.29635e-13
0.2079	7.58337e-11	1.76367e-11	1.40493e-11	1.32371e-11	0.0079	-2.3518e-13	-1.22745e-12
0.208	7.50751e-11	1.87926e-11	1.79546e-11	1.42126e-11	0.008	-3.26225e-13	-4.59061e-13
0.2081	7.3706e-11	1.90127e-11	2.50337e-11	1.45776e-11	0.0081	3.16643e-13	-2.13077e-12
0.2082	7.21336e-11	1.54485e-11	3.02818e-11	1.1891e-11	0.0082	1.44922e-12	-2.94674e-12
0.2083	7.28804e-11	1.73775e-11	2.73512e-11	1.16457e-11	0.0083	2.09486e-12	-2.54082e-12
0.2084	7.21625e-11	1.78417e-11	2.36881e-11	1.46963e-11	0.0084	2.2535e-12	1.89452e-12
0.2085	7.08341e-11	1.54169e-11	1.94147e-11	1.6038e-11	0.0085	1.07052e-12	1.81427e-12
0.2086	7.04417e-11	1.60031e-11	1.58737e-11	1.60369e-11	0.0086	-1.57623e-12	-2.78173e-12
0.2087	7.02934e-11	1.88273e-11	1.70935e-11	1.55475e-11	0.0087	-2.39095e-12	-2.61623e-12
0.2088	7.14065e-11	1.91287e-11	2.08767e-11	9.68696e-12	0.0088	-6.41358e-13	-2.08389e-12
0.2089	7.38623e-11	1.81687e-11	1.83123e-11	1.02962e-11	0.0089	3.76556e-13	-2.40551e-12
0.209	7.67251e-11	2.04639e-11	1.26961e-11	1.32248e-11	0.009	1.51719e-12	-1.87222e-12
0.2091	7.92623e-11	2.20674e-11	1.17186e-11	1.26133e-11	0.0091	3.14664e-12	1.10279e-12
0.2092	7.89919e-11	2.60716e-11	1.42811e-11	9.68246e-12	0.0092	1.11444e-12	2.2469e-12
0.2093	7.88843e-11	2.55592e-11	1.45243e-11	9.80341e-12	0.0093	-6.29167e-14	2.65863e-12
0.2094	8.32119e-11	2.37854e-11	1.02509e-11	1.01685e-11	0.0094	-5.07589e-13	1.85468e-14
0.2095	8.72954e-11	2.29475e-11	9.51756e-12	1.1266e-11	0.0095	-9.76094e-14	-7.90662e-13
0.2096	8.56822e-11	2.15399e-11	6.09865e-12	1.07766e-11	0.0096	-1.76277e-12	-3.30913e-12
0.2097	7.90642e-11	1.84641e-11	4.877e-12	1.38272e-11	0.0097	4.78293e-13	-7.41491e-12
0.2098	7.95262e-11	1.25806e-11	7.68368e-12	1.17509e-11	0.0098	3.36484e-14	-3.22044e-12
0.2099	8.08021e-11	1.18647e-11	1.00021e-11	9.55253e-12	0.0099	-4.11219e-13	-1.46799e-12
0.21	8.18745e-11	1.41193e-11	9.39077e-12	7.35414e-12	0.01	4.86369e-13	-1.05907e-12
0.2101	8.46965e-11	1.66179e-11	9.5119e-12	7.35302e-12	0.0101	3.2146e-12	-2.48199e-12
0.2102	8.80476e-11	1.90352e-11	1.3051e-11	8.57259e-12	0.0102	4.11125e-12	-2.1968e-12
0.2103	8.93234e-11	1.88483e-11	1.62239e-11	8.20526e-12	0.0103	3.5425e-12	-6.91855e-13
0.2104	8.68965e-11	1.76849e-11	1.89085e-11	7.71585e-12	0.0104	1.8745e-12	1.30037e-12
0.2105	8.37371e-11	1.99394e-11	2.23255e-11	1.04003e-11	0.0105	1.30445e-12	8.50111e-13
0.2106	8.30598e-11	1.9427e-11	2.12259e-11	1.34509e-11	0.0106	2.45411e-13	1.54565e-13
0.2107	8.18128e-11	1.76939e-11	1.73187e-11	2.35816e-11	0.0107	1.13871e-12	-4.20141e-13
0.2108	8.18273e-11	1.80767e-11	1.01156e-11	2.9684e-11	0.0108	-5.3235e-13	-4.16995e-12
0.2109	8.21673e-11	1.84595e-11	5.10982e-12	2.4678e-11	0.0109	-5.37822e-12	-6.45625e-12
0.211	8.10831e-11	1.84354e-11	6.20751e-12	1.89396e-11	0.011	-3.02299e-12	-4.22729e-12
0.2111	8.12603e-11	1.54816e-11	-6.61082e-12	1.4666e-11	0.0111	-7.90973e-13	-1.75558e-12
0.2112	7.93623e-11	1.53354e-11	-5.39106e-12	1.12469e-11	0.0112	-3.91235e-13	-5.05974e-13
0.2113	7.67726e-11	1.641e-11	5.89442e-13	-8.39181e-13	0.0113	-3.58991e-13	-1.08884e-12
0.2114	7.91877e-11	1.67927e-11	4.12853e-12	-8.04245e-12	0.0114	1.13676e-12	-1.30695e-12
0.2115	7.98939e-11	1.5792e-11	7.7897e-12	-4.2594e-12	0.0115	4.33831e-13	-6.7203e-13
0.2116	7.81587e-11	1.71107e-11	7.42255e-12	-2.18533e-12	0.0116	-1.48455e-13	2.0551e-13
0.2117	7.42669e-11	1.96094e-11	1.6843e-12	-1.5761e-12	0.0117	1.58714e-12	2.26985e-13
0.2118	7.15144e-11	1.63707e-11	9.64391e-14	-1.94343e-12	0.0118	3.07713e-12	-1.95041e-12
0.2119	6.98199e-11	1.4068e-11	1.07206e-12	-1.57834e-12	0.0119	2.73464e-12	-2.42049e-12
0.212	7.29675e-11	1.18466e-11	9.45513e-14	1.35022e-12	0.012	1.93462e-13	-2.40394e-12
0.2121	7.68882e-11	1.25956e-11	1.68052e-12	4.88913e-12	0.0121	-1.25048e-12	-3.60977e-12
0.2122	7.59667e-11	1.50129e-11	3.6327e-12	7.45148e-12	0.0122	-1.59719e-12	-5.06148e-12
0.2123	7.52895e-11	1.32391e-11	6.07316e-12	1.05021e-11	0.0123	-2.18941e-12	-4.19561e-12
0.2124	7.47749e-11	1.26453e-11	9.24605e-12	5.9844e-12	0.0124	-2.19534e-13	-2.35495e-12
0.2125	7.88584e-11	1.08308e-11	8.63475e-12	-2.42315e-13	0.0125	1.62691e-12	-2.46918e-12
0.2126	7.78963e-11	9.91154e-12	4.60549e-12	1.46555e-12	0.0126	-1.5329e-12	-1.73065e-12
0.2127	7.20514e-11	7.73084e-12	2.77349e-12	5.49274e-12	0.0127	-2.25266e-12	-1.48212e-12
0.2128	6.86072e-11	8.76465e-12	5.58016e-12	6.46818e-12	0.0128	-8.98598e-13	-2.94426e-12
0.2129	6.72382e-11	1.02461e-11	8.50891e-12	7.44362e-12	0.0129	-1.13279e-12	-8.68047e-13
0.213	6.82292e-11	1.03034e-11	1.02169e-11	5.61144e-12	0.013	-5.13816e-13	2.29968e-13
0.2131	6.95457e-11	1.05234e-11	1.08264e-11	4.0234e-12	0.0131	-2.09341e-12	-1.60329e-12
0.2132	6.85836e-11	1.11503e-11	8.50608e-12	3.534e-12	0.0132	-1.34302e-13	-4.04844e-12
0.2133	6.80284e-11	1.20214e-11	-4.05999e-13	3.65495e-12	0.0133	6.02784e-13	-1.97852e-12
0.2134	6.50317e-11	1.35028e-11	5.20829e-12	4.1421e-12	0.0134	-7.36654e-13	9.4441e-13
0.2135	6.55345e-11	1.46994e-11	8.13704e-12	1.12658e-13	0.0135	-2.22738e-15	-6.50654e-13
0.2136	6.49386e-11	1.23966e-11	5.81675e-12	-2.57401e-12	0.0136	1.70745e-12	-1.75873e-12
0.2137	6.34068e-11	1.11111e-11	4.35097e-12	1.69733e-12	0.0137	1.82894e-12	-2.86804e-12
0.2138	6.30957e-11	1.00698e-11	2.03069e-12	-1.5997e-12	0.0138	4.84278e-13	-2.63572e-12
0.2139	6.26626e-11	9.88288e-12	3.61666e-12	3.28199e-12	0.0139	9.69405e-13	-8.17549e-13
0.214	6.17005e-11	8.71944e-12	4.59228e-12	2.79259e-12	0.014	-1.33598e-13	-1.44178e-12
0.2141	6.0657e-11	8.45119e-12	1.78371e-12	-2.21342e-12	0.0141	-1.4819e-12	8.25034e-15
0.2142	5.90438e-11	8.75261e-12	2.27105e-12	-9.17255e-12	0.0142	-7.56078e-13	-2.57085e-12
0.2143	5.81631e-11	9.33884e-12	3.61288e-12	-1.61317e-11	0.0143	-5.19557e-13	-4.29618e-12
0.2144	5.92762e-11	9.76229e-12	4.83264e-12	-1.66211e-11	0.0144	-2.84026e-13	-3.82483e-12
0.2145	5.64016e-11	1.1081e-11	4.70963e-12	-1.24718e-11	0.0145	-7.81896e-13	-2.98776e-12
0.2146	5.47478e-11	1.20741e-11	5.56317e-12	-7.95635e-12	0.0146	1.28275e-12	-1.29662e-12
0.2147	5.81802e-11	1.03003e-11	6.41672e-12	-6.00434e-12	0.0147	1.88162e-12	-1.43689e-12
0.2148	5.66891e-11	8.40445e-12	8.85718e-12	-6.61582e-12	0.0148	-5.72146e-13	-1.94368e-12
0.2149	5.73546e-11	9.60105e-12	1.41053e-11	-9.91284e-12	0.0149	5.1326e-13	-1.71834e-12
0.215	6.31471e-11	9.29209e-12	1.3616e-11	-8.44912e-12	0.015	1.23163e-12	-3.08012e-12
0.2151	6.37718e-11	1.15059e-11	1.06854e-11	-4.66607e-12	0.0151	1.0947e-12	-3.58755e-12
0.2152	6.08159e-11	1.1848e-11	7.75477e-12	-5.0334e-12	0.0152	4.68732e-13	-3.24057e-12
0.2153	5.786e-11	1.09694e-11	5.06828e-12	-7.47593e-12	0.0153	1.18485e-12	-2.03912e-12
0.2154	5.7142e-11	9.35841e-12	6.53219e-12	-7.72119e-12	0.0154	1.16794e-12	1.84791e-12
0.2155	5.6953e-11	8.03221e-12	1.16582e-11	-7.96646e-12	0.0155	-7.02598e-14	2.19498e-12
0.2156	5.77813e-11	7.56051e-12	1.26338e-11	-8.08965e-12	0.0156	8.88262e-13	1.44352e-12
0.2157	5.95047e-11	9.20467e-12	7.01763e-12	-1.30957e-11	0.0157	1.23586e-12	-2.84401e-13
0.2158	5.91529e-11	1.12558e-11	4.69735e-12	-1.60265e-11	0.0158	-9.80576e-13	-7.91504e-13
0.2159	5.77839e-11	1.09061e-11	3.59778e-12	-1.38303e-11	0.0159	-1.85479e-12	-1.99875e-13
0.216	5.74322e-11	1.06785e-11	7.38101e-12	-1.07797e-11	0.016	-1.75304e-12	-3.02617e-12
0.2161	5.72838e-11	8.00959e-12	1.34836e-11	-1.17574e-11	0.0161	-5.5328e-13	-3.53311e-12
0.2162	5.6688e-11	5.91026e-12	1.45813e-11	-1.33454e-11	0.0162	-9.41069e-13	-1.72073e-12
0.2163	5.66617e-11	6.82203e-12	1.33596e-11	-1.27362e-11	0.0163	-1.57367e-12	-2.47186e-12
0.2164	5.65134e-11	9.64621e-12	1.51897e-11	-1.54229e-11	0.0164	1.12378e-13	-5.37492e-13
0.2165	5.63244e-11	1.55222e-11	1.92171e-11	-1.95744e-11	0.0165	5.77019e-13	2.98156e-13
0.2166	5.52402e-11	1.22022e-11	2.47093e-11	-1.94534e-11	0.0166	4.30606e-13	7.67469e-13
0.2167	5.60684e-11	4.93521e-12	2.49525e-11	-2.39712e-11	0.0167	-6.93071e-13	3.82133e-13
0.2168	5.6205e-11	5.48075e-12	2.45854e-11	-2.92213e-11	0.0168	-1.08504e-12	-1.25477e-13
0.2169	5.62601e-11	7.97943e-12	2.26313e-11	-2.89783e-11	0.0169	7.19529e-13	-2.09816e-12
0.217	5.7007e-11	7.91461e-12	1.59165e-11	-2.18993e-11	0.017	2.15716e-12	-1.75181e-12
0.2171	5.59228e-11	7.84982e-12	1.323e-11	-1.75059e-11	0.0171	6.64369e-13	-6.29982e-14
0.2172	5.54897e-11	8.06985e-12	1.8356e-11	-1.55539e-11	0.0172	2.6946e-13	-1.9146e-12
0.2173	5.39172e-11	7.47606e-12	1.83551e-11	-1.84847e-11	0.0173	-2.48268e-13	-3.15628e-12
0.2174	5.17344e-11	5.21399e-12	1.32272e-11	-1.54341e-11	0.0174	8.7751e-14	-4.03227e-12
0.2175	4.96736e-11	2.17883e-12	9.19791e-12	-9.33171e-12	0.0175	2.25408e-12	-3.6881e-12
0.2176	5.00543e-11	2.76506e-12	6.63349e-12	-9.82111e-12	0.0176	2.46655e-12	-3.34454e-12
0.2177	5.01908e-11	6.19958e-12	3.09251e-12	-9.45603e-12	0.0177	-4.955e-13	1.72209e-13
0.2178	4.90252e-11	8.16928e-12	2.48121e-12	-8.96887e-12	0.0178	-3.09204e-12	2.61726e-14
0.2179	5.00569e-11	7.08722e-12	8.70585e-12	-1.0801e-11	0.0179	-1.05057e-12	-3.29441e-12
0.218	5.56459e-11	6.08655e-12	1.0658e-11	-1.00697e-11	0.018	1.2344e-12	-1.00053e-12
0.2181	5.77763e-11	9.64317e-12	8.09362e-12	-1.25123e-11	0.0181	3.39672e-12	9.26353e-13
0.2182	5.40065e-11	1.28336e-11	8.70302e-12	-1.349e-11	0.0182	4.94812e-12	-8.09669e-13
0.2183	5.1661e-11	1.08156e-11	9.67864e-12	-8.24206e-12	0.0183	2.95896e-12	-2.1803e-12
0.2184	5.15127e-11	9.32668e-12	1.43164e-11	-5.43557e-12	0.0184	-7.22946e-15	-2.20896e-12
0.2185	5.09981e-11	6.57633e-12	1.79775e-11	-5.80291e-12	0.0185	-6.54499e-13	-2.60462e-12
0.2186	4.96291e-11	4.19217e-12	1.5169e-11	-5.80403e-12	0.0186	-1.30214e-12	-3.61139e-12
0.2187	4.99691e-11	5.18534e-12	1.10176e-11	-3.85203e-12	0.0187	1.25074e-13	-1.32305e-12
0.2188	5.06753e-11	6.54469e-12	7.11045e-12	-1.41175e-12	0.0188	-1.13353e-12	-1.47689e-12
0.2189	5.06897e-11	7.49715e-12	8.69641e-12	-3.61014e-12	0.0189	-3.00267e-12	7.74892e-14
0.219	5.13959e-11	8.28683e-12	8.32926e-12	-9.95891e-12	0.019	-2.5526e-12	-6.88196e-13
0.2191	5.36483e-11	7.69306e-12	7.59589e-12	-1.49649e-11	0.0191	-1.61427e-12	-4.01806e-12
0.2192	5.39069e-11	8.80823e-12	9.54808e-12	-1.10598e-11	0.0192	3.47446e-12	-1.97748e-12
0.2193	4.97709e-11	1.08593e-11	8.32643e-12	-8.13123e-12	0.0193	3.5584e-12	-1.03613e-12
0.2194	4.65709e-11	1.1649e-11	1.88235e-11	-5.93509e-12	0.0194	2.17765e-12	-2.29256e-12
0.2195	4.60564e-11	1.19911e-11	2.83441e-11	-7.52313e-12	0.0195	1.89577e-12	-2.45083e-12
0.2196	4.72508e-11	8.79317e-12	2.23617e-11	-7.40218e-12	0.0196	-8.27215e-13	-7.78424e-13
0.2197	4.60039e-11	5.10693e-12	1.78441e-11	6.75685e-12	0.0197	-9.78991e-15	2.83334e-13
0.2198	4.70763e-11	5.20489e-12	1.18617e-11	8.95299e-12	0.0198	2.27289e-12	2.46264e-13
0.2199	4.63176e-11	5.46562e-12	4.78073e-12	5.28976e-12	0.0199	2.48086e-12	-1.98816e-12
0.22	4.52741e-11	2.71528e-12	5.07322e-13	2.60309e-12	0.02	3.79471e-15	-2.75775e-12
0.2201	4.62651e-11	2.16218e-12	-5.92257e-13	3.57853e-12	0.0201	-7.63686e-13	-1.45205e-12
0.2202	4.92093e-11	3.56222e-12	-3.40082e-12	4.03575e-13	0.0202	-2.01881e-12	-1.46165e-13
0.2203	4.95085e-11	4.02638e-12	-8.1625e-12	-7.28798e-12	0.0203	-1.19804e-12	-4.26922e-13
0.2204	4.58609e-11	7.583e-12	-9.26208e-12	-1.21719e-11	0.0204	6.0001e-13	1.24583e-12
0.2205	4.51836e-11	7.84371e-12	-7.43197e-12	-1.10744e-11	0.0205	3.49745e-12	2.30875e-12
0.2206	4.4547e-11	8.22651e-12	-6.33428e-12	-1.24183e-11	0.0206	2.2453e-12	6.86792e-13
0.2207	4.31373e-11	7.83617e-12	-5.84694e-12	-1.19311e-11	0.0207	7.49851e-13	2.86328e-13
0.2208	3.63972e-11	8.62585e-12	-1.94164e-12	-1.22985e-11	0.0208	1.57465e-12	-1.82222e-12
0.2209	3.35227e-11	7.8693e-12	1.59746e-12	-1.55955e-11	0.0209	1.79007e-12	-5.11821e-13
0.221	3.67923e-11	4.42726e-12	4.15999e-12	-1.90146e-11	0.021	2.00647e-12	-1.39759e-12
0.2211	4.09571e-11	4.81002e-12	5.25768e-12	-2.27999e-11	0.0211	4.05495e-12	5.25456e-13
0.2212	4.40641e-11	6.33215e-12	5.13467e-12	-2.71956e-11	0.0212	3.66305e-12	3.74553e-13
0.2213	4.28171e-11	7.97633e-12	1.01386e-11	-2.71967e-11	0.0213	3.02809e-12	-2.58264e-12
0.2214	4.20991e-11	8.07427e-12	1.37998e-11	-3.02496e-11	0.0214	2.27214e-12	-1.67311e-13
0.2215	4.27646e-11	5.24255e-12	1.2334e-11	-3.36687e-11	0.0215	-3.13749e-13	7.84671e-13
0.2216	4.27384e-11	3.87564e-12	1.35537e-11	-3.15946e-11	0.0216	1.53317e-13	-5.81067e-13
0.2217	4.36887e-11	3.85152e-12	1.44073e-11	-2.72012e-11	0.0217	3.55129e-12	-2.1892e-12
0.2218	4.24824e-11	4.275e-12	1.06222e-11	-2.23195e-11	0.0218	2.43394e-12	-2.20862e-12
0.2219	3.92417e-11	5.1054e-12	1.34288e-11	-9.86944e-12	0.0219	1.56207e-12	-1.73786e-12
0.222	3.88492e-11	6.42405e-12	1.5381e-11	-1.21899e-11	0.022	-4.08371e-14	-3.95072e-12
0.2221	3.93113e-11	5.26062e-12	1.70891e-11	-1.25572e-11	0.0221	-2.0085e-12	-1.1567e-12
0.2222	3.94885e-11	2.22545e-12	1.61116e-11	-1.28025e-11	0.0222	-1.28915e-12	2.24968e-12
0.2223	4.05609e-11	2.56751e-12	1.17161e-11	-1.01181e-11	0.0223	8.96542e-13	5.31167e-13
0.2224	3.93953e-11	3.11307e-12	1.19593e-11	-6.21295e-12	0.0224	1.25266e-12	1.57515e-13
0.2225	3.92877e-11	1.74618e-12	1.20804e-11	-2.7961e-12	0.0225	2.67491e-13	1.00664e-12
0.2226	3.7878e-11	4.12279e-12	9.63805e-12	-5.97105e-12	0.0226	5.04562e-13	2.68075e-14
0.2227	3.77704e-11	4.13936e-12	8.17226e-12	-1.34185e-11	0.0227	1.59773e-12	6.35968e-13
0.2228	3.90055e-11	2.69109e-12	8.53753e-12	-1.64713e-11	0.0228	7.3943e-13	2.10173e-12
0.2229	4.09731e-11	3.47631e-13	1.18325e-11	-1.22e-11	0.0229	6.15234e-13	1.86063e-12
0.223	4.23303e-11	-4.0888e-13	1.40288e-11	-9.75973e-12	0.023	1.71344e-12	-1.18595e-12
0.2231	4.36875e-11	1.07252e-12	1.56148e-11	-5.36632e-12	0.0231	3.05755e-12	-1.4228e-12
0.2232	4.53296e-11	2.06567e-12	1.69566e-11	-3.65846e-12	0.0232	1.47375e-12	-3.2445e-12
0.2233	4.23736e-11	3.22156e-12	1.63453e-11	-4.02579e-12	0.0233	1.84493e-12	-2.37858e-12
0.2234	4.29985e-11	2.74986e-12	1.78092e-11	-7.07868e-12	0.0234	2.58421e-12	-1.67892e-13
0.2235	5.24937e-11	8.94669e-13	2.15924e-11	-6.71359e-12	0.0235	5.03438e-12	1.55647e-12
0.2236	6.2111e-11	1.19611e-12	2.33005e-11	-4.27331e-12	0.0236	2.60363e-12	1.81788e-12
0.2237	7.02228e-11	1.4568e-12	2.19568e-11	-1.96849e-15	0.0237	2.96816e-13	5.94403e-15
0.2238	7.37773e-11	2.93379e-13	2.17117e-11	2.68245e-12	0.0238	-1.76404e-12	-3.39387e-13
0.2239	7.91221e-11	-1.19558e-12	2.06121e-11	4.39031e-12	0.0239	-1.99205e-12	-8.05054e-13
0.224	8.38567e-11	8.23728e-14	2.61043e-11	-2.56882e-12	0.024	1.32172e-12	5.62e-13
0.2241	8.80215e-11	2.21485e-12	2.5371e-11	-6.8424e-12	0.0241	2.80613e-12	-1.24315e-12
0.2242	9.06401e-11	2.39418e-12	1.70692e-11	-2.57106e-12	0.0242	1.97238e-14	-3.16884e-12
0.2243	9.16718e-11	6.61083e-13	1.38945e-11	3.40926e-12	0.0243	4.25337e-14	-2.2855e-12
0.2244	9.09131e-11	1.77628e-12	1.3039e-11	2.91985e-12	0.0244	1.53176e-12	-1.4008e-12
0.2245	9.19855e-11	8.56992e-13	1.42588e-11	4.50564e-12	0.0245	2.53422e-12	-2.65959e-14
0.2246	9.44414e-11	-1.6899e-12	1.9751e-11	2.67346e-12	0.0246	3.90436e-12	1.28062e-13
0.2247	9.70193e-11	-1.3885e-12	1.81632e-11	-1.32062e-14	0.0247	3.93312e-12	-1.30311e-12
0.2248	9.64234e-11	-4.95267e-12	1.55987e-11	-6.24682e-13	0.0248	2.86457e-12	1.96404e-13
0.2249	9.7862e-11	-7.49958e-12	1.41329e-11	-5.03737e-13	0.0249	1.43104e-12	9.64433e-13
0.225	9.8202e-11	-4.47193e-12	1.42541e-11	2.91311e-12	0.025	-3.67541e-13	1.48918e-12
0.2251	9.52053e-11	-1.40359e-12	1.96242e-11	4.98718e-12	0.0251	1.13084e-12	3.05695e-13
0.2252	9.52605e-11	-3.62497e-12	1.92571e-11	2.05637e-12	0.0252	5.07159e-12	-1.36536e-12
0.2253	9.58446e-11	-4.21874e-12	1.65706e-11	-1.48479e-12	0.0253	2.78761e-12	-7.16465e-13
0.2254	9.42314e-11	-3.91735e-12	1.60813e-11	-8.75566e-13	0.0254	3.82305e-13	-1.04357e-12
0.2255	9.40424e-11	-4.06354e-12	1.35169e-11	2.053e-12	0.0255	-8.0163e-13	-1.00399e-12
0.2256	9.41789e-11	-3.23315e-12	1.32718e-11	3.63879e-12	0.0256	-1.86292e-12	-8.41906e-13
0.2257	9.74079e-11	-8.34333e-14	1.36371e-11	5.957e-12	0.0257	-4.82314e-13	6.63302e-13
0.2258	1.0084e-10	1.03178e-12	1.55893e-11	2.90412e-12	0.0258	-7.78561e-14	-6.38831e-13
0.2259	1.0293e-10	2.87941e-12	1.53442e-11	-2.22396e-12	0.0259	1.1814e-12	-3.52772e-12
0.226	1.03148e-10	1.83804e-12	1.19253e-11	1.43703e-12	0.026	2.56296e-12	-6.79247e-13
0.2261	1.01697e-10	1.36634e-12	1.02154e-11	7.41735e-12	0.0261	2.11359e-12	-2.72197e-13
0.2262	1.01549e-10	2.27808e-12	1.00924e-11	8.14865e-12	0.0262	2.15258e-12	-8.4182e-13
0.2263	9.75353e-11	2.09121e-12	1.24107e-11	2.41022e-12	0.0263	9.7084e-13	-2.38816e-12
0.2264	9.50676e-11	-3.58882e-12	1.58278e-11	-1.25301e-12	0.0264	-9.43415e-13	-5.88787e-12
0.2265	9.7849e-11	-1.06523e-11	1.77799e-11	-2.47484e-12	0.0265	3.15989e-13	-2.79603e-12
0.2266	9.83111e-11	-8.92677e-12	1.99763e-11	-5.16151e-12	0.0266	5.98551e-13	-1.90178e-12
0.2267	9.88138e-11	-6.59086e-12	1.64353e-11	-2.8433e-12	0.0267	-1.68275e-12	-1.00788e-12
0.2268	9.98862e-11	-4.82459e-12	9.59841e-12	6.95615e-13	0.0268	-1.64521e-12	-1.82336e-12
0.2269	9.9982e-11	-4.03493e-12	1.26492e-11	-1.59999e-13	0.0269	-1.11997e-12	-1.54064e-12
0.227	1.00159e-10	-3.81489e-12	1.66766e-11	-5.89843e-12	0.027	2.7005e-12	3.285e-13
0.2271	1.02371e-10	-4.81556e-12	2.15585e-11	-8.5851e-12	0.0271	5.2995e-12	-1.95328e-12
0.2272	1.02792e-10	-4.59553e-12	2.86376e-11	-3.82548e-12	0.0272	3.01483e-12	-1.79425e-12
0.2273	1.00243e-10	-4.90451e-12	2.27773e-11	7.15972e-12	0.0273	2.07199e-12	-1.75789e-12
0.2274	9.92812e-11	-2.28374e-12	1.7039e-11	1.55815e-11	0.0274	1.6164e-12	-3.79403e-13
0.2275	9.97432e-11	-1.77891e-12	1.43525e-11	1.19182e-11	0.0275	-5.55414e-12	-5.88498e-13
0.2276	9.95542e-11	-3.55268e-12	1.34971e-11	7.64463e-12	0.0276	-5.03539e-12	-3.23974e-12
0.2277	9.78597e-11	-8.29685e-12	7.14851e-12	5.81246e-12	0.0277	-1.344e-12	-2.71794e-12
0.2278	9.66941e-11	-9.86719e-12	-4.9374e-12	5.56719e-12	0.0278	-2.53665e-12	-1.22044e-12
0.2279	9.69934e-11	-4.96782e-12	-2.98522e-12	8.7399e-12	0.0279	-9.2297e-13	-8.22465e-13
0.228	9.77403e-11	-3.77122e-12	4.33806e-12	-5.66553e-12	0.028	1.17767e-12	3.06969e-13
0.2281	9.95857e-11	-4.20222e-12	1.34924e-11	-1.46999e-11	0.0281	-5.07229e-13	-7.61884e-13
0.2282	9.8583e-11	-5.93533e-12	1.31252e-11	-9.32988e-12	0.0282	-1.82729e-12	-4.89065e-13
0.2283	9.60746e-11	-5.95945e-12	1.6054e-11	-4.19873e-13	0.0283	-1.1956e-12	-2.1743e-13
0.2284	9.41359e-11	-2.1587e-12	1.9471e-11	5.80459e-12	0.0284	1.87611e-12	-1.77813e-12
0.2285	9.41097e-11	-1.07619e-13	1.87376e-11	1.05642e-11	0.0285	2.13882e-12	-2.97396e-12
0.2286	9.40021e-11	-9.86198e-13	1.5807e-11	1.28824e-11	0.0286	2.03399e-12	-2.58431e-12
0.2287	9.67835e-11	-3.73656e-12	1.53178e-11	1.20268e-11	0.0287	2.17199e-12	-8.53384e-13
0.2288	9.74896e-11	-5.22554e-12	1.64155e-11	1.05608e-11	0.0288	7.21762e-13	-3.39649e-12
0.2289	9.73413e-11	-7.12139e-12	1.77573e-11	1.03156e-11	0.0289	3.68865e-13	-2.64529e-12
0.229	9.84544e-11	-7.63379e-12	1.93433e-11	9.82617e-12	0.029	1.11334e-12	-1.65164e-12
0.2291	9.95268e-11	-5.46062e-12	1.86099e-11	8.23813e-12	0.0291	1.97867e-12	1.53755e-12
0.2292	1.00803e-10	-4.46749e-12	1.37261e-11	6.03974e-12	0.0292	1.62215e-12	3.30413e-13
0.2293	9.73177e-11	-5.99712e-12	1.29928e-11	5.30619e-12	0.0293	1.50873e-12	-1.97717e-12
0.2294	9.37921e-11	-1.00496e-11	1.25036e-11	6.03749e-12	0.0294	4.17735e-13	-1.96734e-12
0.2295	9.08362e-11	-1.04806e-11	8.35222e-12	6.52465e-12	0.0295	1.80328e-13	-1.22703e-12
0.2296	9.10948e-11	-9.52813e-12	8.47335e-12	4.69247e-12	0.0296	-1.79965e-13	-3.2963e-12
0.2297	9.2452e-11	-7.96534e-12	1.20124e-11	5.42377e-12	0.0297	-5.40982e-13	-3.29233e-12
0.2298	9.12865e-11	-5.58873e-12	7.73904e-12	7.00956e-12	0.0298	-2.92284e-13	-1.8255e-12
0.2299	8.9063e-11	-1.99143e-12	5.90704e-12	6.76429e-12	0.0299	2.27519e-12	-3.41245e-12
0.23	8.9525e-11	-1.89349e-12	2.85434e-12	3.71141e-12	0.03	2.03487e-13	-3.65866e-12
0.2301	8.96615e-11	-3.46381e-12	6.27136e-12	2.97787e-12	0.0301	-4.03842e-13	-1.95377e-12
0.2302	9.01643e-11	-5.03415e-12	6.39249e-12	1.63397e-12	0.0302	-1.49987e-12	-2.20399e-12
0.2303	9.07077e-11	-5.05827e-12	6.51361e-12	4.44046e-12	0.0303	-7.6521e-13	-2.45617e-12
0.2304	8.942e-11	-2.9665e-12	6.75681e-12	7.61317e-12	0.0304	2.13335e-13	-2.09998e-12
0.2305	8.69524e-11	-8.34025e-13	5.77931e-12	4.07201e-12	0.0305	9.30549e-14	-1.25742e-12
0.2306	8.62751e-11	-2.2823e-12	7.85356e-12	6.14608e-12	0.0306	9.4722e-14	-1.02707e-12
0.2307	8.73068e-11	-6.33476e-12	5.77742e-12	4.92425e-12	0.0307	9.62815e-14	-5.54381e-13
0.2308	8.71585e-11	-6.15539e-12	4.31163e-12	8.34109e-12	0.0308	-6.34644e-13	-2.05505e-13
0.2309	8.55453e-11	-5.36571e-12	3.8224e-12	1.63966e-11	0.0309	-9.9939e-13	-1.56728e-12
0.231	8.7106e-11	-6.32573e-12	3.82146e-12	1.85928e-11	0.031	-8.75861e-13	-2.19826e-12
0.2311	8.48825e-11	-6.47189e-12	8.21505e-12	1.32205e-11	0.0311	-3.86106e-13	-2.8308e-12
0.2312	8.11942e-11	-4.99049e-12	1.41955e-11	1.04118e-11	0.0312	2.25732e-13	-5.29584e-12
0.2313	8.03134e-11	-6.23527e-12	1.41946e-11	8.45755e-12	0.0313	-7.49356e-13	-5.07667e-12
0.2314	8.23624e-11	-7.11389e-12	6.25909e-12	8.09021e-12	0.0314	-1.35827e-12	-3.51596e-12
0.2315	8.22548e-11	-6.89388e-12	6.25815e-12	8.69944e-12	0.0315	1.8169e-12	-3.54329e-12
0.2316	8.4263e-11	-6.22626e-12	1.27269e-11	1.01632e-11	0.0316	2.67258e-12	-2.35093e-12
0.2317	8.65561e-11	-4.86692e-12	1.87074e-11	1.24814e-11	0.0317	1.20872e-12	-3.845e-12
0.2318	8.40071e-11	-4.32134e-12	1.98051e-11	1.22361e-11	0.0318	1.20945e-12	-2.28802e-12
0.2319	8.06443e-11	-3.20615e-12	1.74848e-11	7.71838e-12	0.0319	2.33259e-13	-2.43354e-13
0.232	7.69966e-11	-2.78267e-12	1.55308e-11	6.7407e-12	0.032	7.21468e-13	-1.25091e-12
0.2321	7.754e-11	-2.11506e-12	1.30884e-11	9.54719e-12	0.0321	1.10537e-13	-1.40429e-12
0.2322	7.74324e-11	-1.97642e-12	1.12564e-11	1.17433e-11	0.0322	1.0939e-13	-9.3041e-14
0.2323	7.64296e-11	-1.7564e-12	7.95958e-12	8.56838e-12	0.0323	1.93869e-12	4.8573e-13
0.2324	7.4084e-11	-4.87294e-12	1.1987e-11	6.85827e-12	0.0324	1.69213e-12	1.30871e-12
0.2325	7.19419e-11	-8.76261e-12	1.80895e-11	6.36887e-12	0.0325	3.46203e-13	7.89092e-13
0.2326	7.26888e-11	-1.12281e-11	1.19851e-11	8.44294e-12	0.0326	4.64275e-13	-9.6448e-14
0.2327	7.55922e-11	-1.00722e-11	9.78686e-12	1.08832e-11	0.0327	2.90072e-12	-5.04371e-15
0.2328	7.60136e-11	-6.2308e-12	1.14949e-11	1.52766e-11	0.0328	2.28434e-12	-1.01178e-12
0.2329	7.46852e-11	-4.42386e-12	9.29669e-12	1.41769e-11	0.0329	2.15512e-12	-7.97219e-13
0.233	7.16886e-11	-6.23834e-12	1.34461e-11	1.41757e-11	0.033	9.26089e-13	-7.04043e-13
0.2331	7.03196e-11	-7.44245e-12	1.89384e-11	9.53595e-12	0.0331	6.72414e-13	-1.34251e-12
0.2332	7.13106e-11	-4.29276e-12	1.91816e-11	7.33756e-12	0.0332	6.61597e-13	-1.00354e-12
0.2333	7.09182e-11	-3.13687e-12	1.69833e-11	1.1853e-11	0.0333	-9.3744e-13	3.12907e-13
0.2334	6.85726e-11	-7.19566e-13	1.60058e-11	9.41051e-12	0.0334	-1.56127e-12	1.26412e-12
0.2335	6.76919e-11	-1.51678e-12	2.05215e-11	8.43282e-12	0.0335	-5.99572e-13	2.21634e-12
0.2336	6.81946e-11	-4.95887e-12	2.36944e-11	9.28619e-12	0.0336	1.09318e-12	-1.71324e-12
0.2337	7.08946e-11	-6.04093e-12	2.2961e-11	1.12382e-11	0.0337	-2.67175e-13	-3.56661e-12
0.2338	7.08683e-11	-4.92572e-12	2.03966e-11	1.4655e-11	0.0338	-1.873e-12	-1.2686e-12
0.2339	6.99469e-11	-1.65393e-12	1.90529e-11	1.61188e-11	0.0339	-2.74772e-12	-6.78596e-13
0.234	6.61772e-11	1.17025e-12	1.2216e-11	1.6728e-11	0.034	-1.18234e-12	-2.0408e-12
0.2341	6.13495e-11	-4.38772e-12	6.11154e-12	1.5262e-11	0.0341	-2.42587e-12	-3.64625e-12
0.2342	6.11198e-11	-1.1614e-11	8.552e-12	1.31857e-11	0.0342	-1.47341e-12	-6.12176e-13
0.2343	6.33315e-11	-1.25333e-11	1.17249e-11	1.01328e-11	0.0343	-4.00113e-13	1.81231e-12
0.2344	6.35087e-11	-1.10519e-11	1.3555e-11	1.11083e-11	0.0344	-1.40326e-12	-1.74401e-12
0.2345	6.57611e-11	-9.36699e-12	1.3554e-11	1.50134e-11	0.0345	5.22042e-13	-3.83495e-12
0.2346	6.67115e-11	-8.04833e-12	9.64686e-12	1.65992e-11	0.0346	9.81288e-13	-2.50752e-12
0.2347	6.88825e-11	-6.89244e-12	1.28197e-11	1.20814e-11	0.0347	4.62775e-13	4.92371e-12
0.2348	6.86121e-11	-1.09786e-12	1.85561e-11	1.1592e-11	0.0348	1.77416e-12	2.34535e-12
0.2349	6.80976e-11	1.36012e-12	2.18511e-11	9.88193e-12	0.0349	1.86372e-12	-2.06401e-12
0.235	6.51417e-11	-2.12264e-12	2.40474e-11	8.66011e-12	0.035	2.19638e-12	-3.66582e-12
0.2351	6.25926e-11	-6.09372e-12	2.45347e-11	1.12225e-11	0.0351	6.96993e-13	-1.36158e-12
0.2352	6.04098e-11	-7.17577e-12	2.24586e-11	1.37848e-11	0.0352	-3.48884e-12	-2.78351e-13
0.2353	5.85118e-11	-5.32812e-12	1.50113e-11	1.53706e-11	0.0353	-4.37962e-12	-2.61351e-12
0.2354	5.9218e-11	-3.60258e-12	7.44204e-12	1.75667e-11	0.0354	-2.82976e-12	-3.24023e-12
0.2355	6.0738e-11	-6.14949e-12	1.58172e-12	1.4758e-11	0.0355	4.28399e-13	-2.89101e-12
0.2356	6.25835e-11	-7.8419e-12	6.46359e-12	9.62993e-12	0.0356	6.34203e-13	-1.07766e-12
0.2357	6.12145e-11	-8.88326e-12	1.45193e-11	6.3329e-12	0.0357	-1.49993e-14	-1.19588e-13
0.2358	5.59392e-11	-7.56459e-12	1.37859e-11	6.69799e-12	0.0358	6.78161e-13	1.05221e-13
0.2359	5.53026e-11	-5.51352e-12	1.08553e-11	9.38241e-12	0.0359	3.20209e-12	2.07078e-13
0.236	5.74737e-11	-2.32311e-12	1.13426e-11	8.40473e-12	0.036	3.40647e-12	-1.52303e-12
0.2361	5.83019e-11	-2.46929e-12	2.67225e-11	9.13602e-12	0.0361	4.34318e-12	-3.132e-12
0.2362	5.91302e-11	-4.85343e-12	2.92851e-11	7.18178e-12	0.0362	3.08265e-12	-2.4226e-12
0.2363	5.88598e-11	-4.06373e-12	2.28144e-11	1.49932e-11	0.0363	3.7754e-12	-1.95837e-12
0.2364	5.41135e-11	-6.16307e-12	1.64658e-11	2.43914e-11	0.0364	2.88148e-12	-3.20419e-12
0.2365	5.05065e-11	-8.58788e-12	1.5e-11	1.95075e-11	0.0365	5.23082e-13	-3.23032e-12
0.2366	4.95444e-11	-9.8327e-12	2.0126e-11	1.40132e-11	0.0366	1.09487e-12	-1.06017e-12
0.2367	5.05354e-11	-1.63673e-11	2.41534e-11	9.25135e-12	0.0367	2.39977e-12	-1.21028e-12
0.2368	5.40085e-11	-1.6432e-11	2.37862e-11	9.73851e-12	0.0368	2.72891e-12	-3.84674e-13
0.2369	5.79699e-11	-1.37706e-11	1.8048e-11	1.27891e-11	0.0369	1.22792e-12	3.12573e-12
0.237	5.64381e-11	-9.03399e-12	1.58498e-11	1.48632e-11	0.037	1.8032e-12	-1.17701e-12
0.2371	5.38891e-11	-7.95948e-12	2.17082e-11	9.97928e-12	0.0371	1.52515e-12	-2.18433e-12
0.2372	5.14214e-11	-8.02427e-12	2.4759e-11	5.82776e-12	0.0372	-1.80338e-12	-1.483e-12
0.2373	5.13138e-11	-5.89183e-12	2.42698e-11	7.29149e-12	0.0373	-2.44499e-12	-6.59749e-13
0.2374	5.12876e-11	-6.24146e-12	2.12171e-11	7.65657e-12	0.0374	1.30937e-12	1.50629e-12
0.2375	4.78841e-11	-7.16074e-12	1.49906e-11	1.02189e-11	0.0375	2.50178e-12	-3.55843e-13
0.2376	4.89972e-11	-8.16143e-12	1.09613e-11	1.42461e-11	0.0376	7.661e-13	-2.46179e-12
0.2377	5.03544e-11	-9.40623e-12	8.7631e-12	1.49774e-11	0.0377	-4.7966e-13	-3.2245e-12
0.2378	4.87006e-11	-9.14554e-12	7.66353e-12	1.07038e-11	0.0378	3.51494e-13	-1.91137e-12
0.2379	4.71281e-11	-8.31515e-12	7.78465e-12	8.99373e-12	0.0379	1.06233e-12	-1.20781e-12
0.238	4.57997e-11	-1.06993e-11	1.0103e-11	9.60295e-12	0.038	-5.6101e-14	-1.8461e-12
0.2381	4.80928e-11	-1.22696e-11	1.09566e-11	1.03343e-11	0.0381	3.09976e-12	-1.38471e-12
0.2382	4.8677e-11	-8.02127e-12	1.57164e-11	9.96692e-12	0.0382	1.86294e-12	-5.55928e-13
0.2383	4.85286e-11	-3.52881e-12	2.08424e-11	1.2041e-11	0.0383	1.11631e-12	-7.02334e-13
0.2384	4.78513e-11	-5.26189e-12	2.07194e-11	1.35047e-11	0.0384	1.10403e-12	-1.14801e-13
0.2385	4.7581e-11	-7.60534e-12	2.26716e-11	1.04518e-11	0.0385	-8.59453e-13	-7.46281e-13
0.2386	4.88161e-11	-8.6874e-12	2.66989e-11	9.84035e-12	0.0386	-1.11203e-12	8.89341e-14
0.2387	5.11906e-11	-8.79291e-12	2.13269e-11	9.9613e-12	0.0387	2.24206e-13	6.82003e-13
0.2388	5.25478e-11	-8.12529e-12	1.9617e-11	1.6674e-11	0.0388	1.92854e-12	5.64991e-14
0.2389	4.93885e-11	-8.47492e-12	1.61981e-11	2.08233e-11	0.0389	2.04781e-12	-1.42122e-12
0.239	4.73684e-11	-9.15008e-12	1.85165e-11	1.91132e-11	0.039	9.48213e-13	3.99375e-13
0.2391	4.55925e-11	-9.54041e-12	2.30321e-11	1.545e-11	0.0391	1.68146e-12	2.95492e-12
0.2392	4.67869e-11	-1.0419e-11	2.2665e-11	1.0444e-11	0.0392	5.10205e-12	4.04827e-12
0.2393	4.85104e-11	-9.22241e-12	1.61943e-11	1.2518e-11	0.0393	4.49612e-12	2.58083e-12
0.2394	5.03559e-11	-8.35133e-12	1.26533e-11	1.54466e-11	0.0394	2.54924e-12	2.21488e-12
0.2395	4.90682e-11	-7.64305e-12	1.06992e-11	1.76427e-11	0.0395	1.21457e-12	9.97354e-13
0.2396	5.03441e-11	-6.77199e-12	1.13086e-11	2.10596e-11	0.0396	2.32318e-12	-2.41447e-12
0.2397	5.03585e-11	-8.58645e-12	1.47257e-11	1.45887e-11	0.0397	2.09089e-12	-2.77153e-12
0.2398	5.16344e-11	-1.2883e-11	1.6922e-11	1.14138e-11	0.0398	2.94565e-14	5.36581e-13
0.2399	5.04281e-11	-1.40058e-11	1.47238e-11	1.22671e-11	0.0399	-5.65224e-13	3.07761e-13
0.24	4.39321e-11	-1.20361e-11	1.8507e-11	1.2266e-11	0.04	1.4055e-12	4.48276e-13
0.2401	4.07728e-11	-9.49672e-12	1.87502e-11	1.32415e-11	0.0401	1.05882e-12	-1.84401e-14
0.2402	4.13162e-11	-8.09668e-12	2.1801e-11	1.66583e-11	0.0402	2.17892e-12	4.94478e-13
0.2403	4.23479e-11	-1.18643e-11	2.14339e-11	1.71455e-11	0.0403	1.4699e-12	-4.5439e-13
0.2404	4.38679e-11	-1.34346e-11	1.65501e-11	1.61678e-11	0.0404	2.22761e-12	-5.74887e-14
0.2405	4.38009e-11	-1.32146e-11	1.49623e-11	1.45797e-11	0.0405	2.98717e-12	-1.00042e-12
0.2406	4.39374e-11	-1.26284e-11	1.75248e-11	1.5189e-11	0.0406	3.30582e-13	2.56775e-13
0.2407	4.17953e-11	-9.35656e-12	1.81342e-11	1.55541e-11	0.0407	1.3379e-12	-1.04676e-12
0.2408	4.0996e-11	-7.50895e-12	1.52036e-11	1.66516e-11	0.0408	1.98079e-12	-3.32422e-12
0.2409	4.15394e-11	-5.86477e-12	1.45923e-11	1.73829e-11	0.0409	5.50259e-13	-2.66945e-12
0.241	4.21642e-11	-6.94682e-12	1.49575e-11	1.38417e-11	0.041	1.19666e-12	1.03946e-12
0.2411	4.21786e-11	-6.93024e-12	1.14166e-11	1.22537e-11	0.0411	2.5786e-13	3.52991e-12
0.2412	4.11352e-11	-6.95435e-12	1.36129e-11	1.59146e-11	0.0412	2.25042e-12	8.95496e-13
0.2413	4.00917e-11	-5.06605e-12	1.58092e-11	1.34721e-11	0.0413	3.26804e-12	-8.82498e-13
0.2414	3.97399e-11	-5.21224e-12	1.76393e-11	1.21282e-11	0.0414	-1.20595e-12	-2.17044e-12
0.2415	3.93881e-11	-1.10143e-11	1.82487e-11	1.29816e-11	0.0415	-2.38254e-12	-1.74781e-12
0.2416	3.73681e-11	-1.39681e-11	1.84919e-11	7.97558e-12	0.0416	-1.77185e-14	-1.44583e-12
0.2417	3.68535e-11	-1.22019e-11	1.81248e-11	9.68344e-12	0.0417	-4.59228e-13	-2.88081e-13
0.2418	3.82108e-11	-1.03949e-11	1.70252e-11	1.16354e-11	0.0418	1.17562e-12	-8.38217e-13
0.2419	3.84287e-11	-5.94314e-12	1.8367e-11	1.1146e-11	0.0419	2.56736e-12	-2.364e-12
0.242	3.53914e-11	-5.39759e-12	2.09295e-11	1.17553e-11	0.042	-6.78642e-13	-3.03455e-12
0.2421	3.39817e-11	-6.92725e-12	2.61776e-11	1.02893e-11	0.0421	3.48606e-13	-3.58247e-12
0.2422	3.35078e-11	-7.88724e-12	2.4956e-11	6.74814e-12	0.0422	3.93996e-12	-1.68863e-12
0.2423	3.60858e-11	-7.58584e-12	2.28798e-11	6.13666e-12	0.0423	2.89313e-12	2.52473e-12
0.2424	3.9152e-11	-5.86028e-12	2.22685e-11	7.60038e-12	0.0424	1.72454e-12	3.19804e-12
0.2425	3.74981e-11	-2.9547e-12	1.93379e-11	1.21159e-11	0.0425	1.53268e-12	-1.57162e-13
0.2426	3.39318e-11	-7.40863e-13	1.95811e-11	1.10161e-11	0.0426	7.30523e-13	-1.07132e-12
0.2427	3.2807e-11	-3.28777e-12	2.16554e-11	5.88803e-12	0.0427	1.27107e-12	-6.43261e-13
0.2428	3.52628e-11	-6.56708e-12	2.42179e-11	5.15448e-12	0.0428	2.54386e-12	-3.38026e-13
0.2429	3.61725e-11	-8.13742e-12	2.15314e-11	4.543e-12	0.0429	6.42507e-13	4.36079e-12
0.243	3.10193e-11	-8.44638e-12	2.00656e-11	1.04013e-11	0.043	-1.38135e-12	-8.2917e-13
0.2431	2.84295e-11	-9.85394e-12	1.61584e-11	1.13767e-11	0.0431	-2.30711e-12	-4.92174e-12
0.2432	2.78743e-11	-1.34588e-11	1.39602e-11	7.71346e-12	0.0432	-2.9894e-12	-4.01081e-12
0.2433	2.5366e-11	-1.40526e-11	1.44475e-11	6.00335e-12	0.0433	-9.86887e-13	-2.73517e-12
0.2434	2.50142e-11	-1.48091e-11	1.55452e-11	3.92704e-12	0.0434	2.23545e-12	-2.55979e-12
0.2435	2.84873e-11	-1.44263e-11	9.56285e-12	1.85072e-12	0.0435	3.13746e-12	-2.01995e-12
0.2436	3.06584e-11	-1.28635e-11	7.60878e-12	3.55858e-12	0.0436	3.55007e-12	-4.04545e-12
0.2437	3.25038e-11	-1.13821e-11	1.10258e-11	6.12093e-12	0.0437	4.21438e-13	-5.09636e-12
0.2438	3.17045e-11	-1.05517e-11	1.96919e-11	6.60809e-12	0.0438	5.87425e-13	-4.07415e-12
0.2439	3.01727e-11	-1.09421e-11	2.6771e-11	6.48489e-12	0.0439	1.24037e-12	-3.54238e-12
0.244	3.12045e-11	-1.14951e-11	2.98218e-11	7.70447e-12	0.044	6.08767e-14	-1.42593e-12
0.2441	3.2521e-11	-9.76955e-12	3.12857e-11	1.39289e-11	0.0441	-2.21871e-12	-1.02077e-12
0.2442	3.38375e-11	-1.04854e-11	2.49371e-11	1.22188e-11	0.0442	-5.96464e-12	-1.83866e-12
0.2443	3.17361e-11	-1.18116e-11	1.98092e-11	1.14853e-11	0.0443	-2.75406e-12	-2.78104e-12
0.2444	2.66236e-11	-1.32599e-11	7.47916e-12	1.39256e-11	0.0444	-3.99477e-13	-2.26101e-12
0.2445	2.7696e-11	-1.33247e-11	-2.40948e-12	1.1361e-11	0.0445	4.71845e-16	-1.98757e-12
0.2446	2.71001e-11	-1.24536e-11	5.89036e-12	2.81492e-12	0.0446	-5.77666e-13	-7.63799e-15
0.2447	2.6789e-11	-1.60992e-11	1.08943e-11	-1.15905e-11	0.0447	-1.80783e-13	-1.69231e-12
0.2448	2.71289e-11	-1.47805e-11	1.07713e-11	-7.44124e-12	0.0448	4.58661e-13	-3.37953e-12
0.2449	2.84455e-11	-1.20784e-11	8.451e-12	-6.06423e-13	0.0449	2.42001e-13	-4.82513e-12
0.245	2.62627e-11	-5.59206e-12	9.30455e-12	-4.85477e-13	0.045	-1.31908e-12	-1.51252e-12
0.2451	2.32253e-11	-3.01202e-12	1.35761e-11	-1.20391e-13	0.0451	-2.63769e-12	-1.25417e-12
0.2452	1.96591e-11	-6.82031e-12	1.39413e-11	1.09919e-12	0.0452	-1.73755e-13	-3.31761e-12
0.2453	2.0406e-11	-5.90856e-12	1.60156e-11	3.65645e-13	0.0453	4.5748e-13	-3.79658e-12
0.2454	2.27397e-11	-6.54304e-12	1.47939e-11	2.56178e-12	0.0454	1.0871e-12	-2.08068e-12
0.2455	2.133e-11	-6.72989e-12	1.21074e-11	6.22277e-12	0.0455	1.59303e-12	-6.11244e-13
0.2456	2.31348e-11	-9.88715e-12	1.41817e-11	4.51266e-12	0.0456	-7.10241e-13	3.67637e-13
0.2457	2.30679e-11	-1.05216e-11	1.49132e-11	-6.15413e-13	0.0457	-1.3061e-12	-4.86737e-13
0.2458	2.69072e-11	-1.29465e-11	1.60109e-11	-4.27865e-12	0.0458	9.04103e-13	-4.88702e-13
0.2459	2.76541e-11	-1.47609e-11	1.57658e-11	-4.89012e-12	0.0459	4.27203e-13	-1.22509e-12
0.246	2.55527e-11	-1.40933e-11	1.64973e-11	3.57778e-13	0.046	1.92913e-13	-2.2075e-12
0.2461	2.38581e-11	-1.35478e-11	1.71067e-11	8.04708e-12	0.0461	-4.0912e-13	-3.43582e-12
0.2462	2.48085e-11	-1.11712e-11	1.69837e-11	1.24405e-11	0.0462	3.30133e-13	-3.32298e-12
0.2463	2.43346e-11	-1.09104e-11	1.99124e-11	1.23173e-11	0.0463	7.01722e-13	-3.33366e-12
0.2464	2.31691e-11	-1.08939e-11	2.01556e-11	6.57887e-12	0.0464	-7.59146e-13	-3.83395e-12
0.2465	2.24918e-11	-1.12842e-11	1.7225e-11	4.13634e-12	0.0465	3.42096e-13	-3.60306e-12
0.2466	2.35235e-11	-1.10642e-11	1.62475e-11	7.17246e-13	0.0466	-1.44929e-13	-2.03057e-12
0.2467	2.37821e-11	-9.62346e-12	1.31948e-11	8.38191e-13	0.0467	3.43246e-13	-2.29021e-12
0.2468	2.37965e-11	-7.8979e-12	1.92973e-11	7.55094e-12	0.0468	3.41832e-13	9.89214e-13
0.2469	2.63744e-11	-9.18341e-12	1.80757e-11	8.89259e-12	0.0469	3.39154e-13	-4.68896e-15
0.247	2.86675e-11	-1.07944e-11	1.66099e-11	1.14549e-11	0.047	5.79436e-13	-2.70834e-12
0.2471	2.75834e-11	-1.13882e-11	1.13599e-11	6.93721e-12	0.0471	9.40643e-13	-2.1168e-12
0.2472	2.35288e-11	-1.02323e-11	6.59824e-12	5.95953e-12	0.0472	-4.20141e-14	-2.25829e-12
0.2473	2.09391e-11	-7.61157e-12	7.45178e-12	6.20255e-12	0.0473	3.17075e-13	-2.15619e-12
0.2474	2.36797e-11	-6.86257e-12	9.03775e-12	6.6897e-12	0.0474	-2.25449e-12	-2.1766e-12
0.2475	2.34501e-11	-8.88049e-12	1.12341e-11	1.46231e-11	0.0475	-1.28694e-12	-8.54574e-13
0.2476	2.19997e-11	-1.41943e-11	1.19656e-11	1.49882e-11	0.0476	-1.17479e-12	-1.43162e-13
0.2477	2.08341e-11	-1.65785e-11	1.19646e-11	1.34002e-11	0.0477	-1.55182e-12	-1.38506e-12
0.2478	2.07672e-11	-1.65619e-11	1.20857e-11	1.29108e-11	0.0478	-3.42842e-13	-2.13883e-12
0.2479	2.10258e-11	-1.4877e-11	1.01317e-11	9.24756e-12	0.0479	3.7697e-13	-3.13685e-12
0.248	2.17726e-11	-1.32735e-11	8.05553e-12	7.17124e-12	0.048	-7.35129e-13	-2.91424e-12
0.2481	1.8654e-11	-1.2728e-11	8.42079e-12	1.08322e-11	0.0481	8.37453e-13	-1.95929e-12
0.2482	1.74477e-11	-1.27928e-11	1.09833e-11	1.10752e-11	0.0482	2.28709e-12	-6.38213e-13
0.2483	2.28332e-11	-1.55838e-11	9.76168e-12	8.14443e-12	0.0483	1.78272e-12	-1.14832e-12
0.2484	2.57367e-11	-1.47535e-11	8.05175e-12	8.63159e-12	0.0484	1.2775e-12	5.04033e-14
0.2485	2.59546e-11	-9.89474e-12	5.6094e-12	1.21705e-11	0.0485	6.49382e-13	1.50337e-13
0.2486	2.38531e-11	-8.98299e-12	6.09674e-12	1.02163e-11	0.0486	-2.29884e-12	6.16287e-13
0.2487	2.14262e-11	-1.15706e-11	9.02548e-12	7.16337e-12	0.0487	-4.14916e-12	-6.26984e-13
0.2488	2.07489e-11	-1.45651e-11	1.14659e-11	2.76772e-12	0.0488	-7.51132e-13	-2.11466e-12
0.2489	2.21061e-11	-1.70306e-11	1.26857e-11	-5.29305e-13	0.0489	3.37866e-12	-1.64949e-12
0.249	2.45213e-11	-1.59561e-11	8.04609e-12	1.54477e-12	0.049	1.16018e-12	-2.08085e-13
0.2491	2.33151e-11	-1.40271e-11	8.28929e-12	9.72235e-12	0.0491	-2.88994e-12	3.78529e-13
0.2492	2.08067e-11	-1.37257e-11	1.21946e-11	1.14302e-11	0.0492	-2.79023e-12	-5.00016e-13
0.2493	1.89494e-11	-1.2936e-11	1.06067e-11	7.76698e-12	0.0493	-3.71746e-13	-2.35543e-12
0.2494	1.87604e-11	-1.2187e-11	1.12161e-11	4.22582e-12	0.0494	-8.83511e-13	-2.13599e-12
0.2495	2.04838e-11	-1.41235e-11	8.40758e-12	1.05087e-12	0.0495	-1.63995e-12	-3.13759e-12
0.2496	2.25735e-11	-1.56532e-11	5.11074e-12	3.17322e-13	0.0496	1.87561e-12	-2.79676e-12
0.2497	2.30762e-11	-1.36835e-11	6.3305e-12	3.49002e-12	0.0497	4.2921e-12	-2.45634e-12
0.2498	2.04865e-11	-7.23786e-12	8.28268e-12	9.25426e-13	0.0498	2.67988e-12	-1.13978e-12
0.2499	1.6554e-11	-1.40263e-12	9.50244e-12	4.46434e-12	0.0499	-3.97509e-13	-3.11984e-13
0.25	1.32725e-11	-5.53642e-12	1.34077e-11	6.29427e-12	0.05	-1.52206e-12	-5.83339e-13
0.2501	1.44263e-11	-1.08909e-11	1.36509e-11	5.92694e-12	0.0501	-6.93712e-13	-2.19804e-12
0.2502	1.84691e-11	-1.34378e-11	1.27955e-11	8.8555e-12	0.0502	6.22714e-13	-2.10438e-12
0.2503	2.37732e-11	-1.37061e-11	1.08414e-11	7.38953e-12	0.0503	1.08448e-12	-6.68617e-13
0.2504	2.48456e-11	-1.14516e-11	6.93424e-12	9.46361e-12	0.0504	9.35717e-13	-4.54256e-13
0.2505	2.08318e-11	-9.15636e-12	7.05537e-12	7.87557e-12	0.0505	5.42693e-13	-3.17029e-12
0.2506	1.84455e-11	-9.54668e-12	1.4989e-11	5.06682e-12	0.0506	1.49601e-13	-3.56772e-12
0.2507	1.45944e-11	-1.38026e-11	1.64529e-11	5.55398e-12	0.0507	1.09929e-12	-3.4776e-12
0.2508	1.33068e-11	-1.50881e-11	1.77947e-11	9.70325e-12	0.0508	2.29314e-12	-3.99855e-12
0.2509	1.48268e-11	-1.68619e-11	1.53524e-11	1.01904e-11	0.0509	2.14425e-12	-2.81127e-12
0.251	1.5126e-11	-1.44853e-11	1.14452e-11	9.82307e-12	0.051	-4.45958e-13	-2.35717e-12
0.2511	1.46522e-11	-1.47128e-11	1.33974e-11	9.57781e-12	0.0511	-2.1816e-12	-3.49077e-12
0.2512	1.43411e-11	-1.73004e-11	1.86454e-11	2.00832e-12	0.0512	-6.21253e-13	-3.16033e-12
0.2513	1.84653e-11	-1.89521e-11	1.70576e-11	-2.87561e-12	0.0513	-2.81529e-13	1.19768e-12
0.2514	2.40543e-11	-1.80404e-11	1.37607e-11	1.39573e-12	0.0514	7.90697e-13	4.33427e-12
0.2515	2.58184e-11	-1.00078e-11	1.47364e-11	9.08503e-12	0.0515	2.71751e-12	8.78376e-13
0.2516	2.35135e-11	-8.85196e-12	1.77872e-11	1.57978e-11	0.0516	1.47056e-12	-5.02961e-13
0.2517	1.80755e-11	-1.18871e-11	2.29132e-11	1.48201e-11	0.0517	-1.48532e-12	-1.64072e-12
0.2518	1.61368e-11	-1.48003e-11	2.81613e-11	9.44787e-12	0.0518	-1.75562e-12	-1.43616e-12
0.2519	1.72499e-11	-1.5923e-11	2.55968e-11	6.51706e-12	0.0519	-1.94884e-13	-6.21615e-13
0.252	1.73457e-11	-1.57436e-11	1.59523e-11	1.10325e-11	0.052	-9.90336e-14	-7.83875e-13
0.2521	1.55698e-11	-1.36926e-11	8.26097e-12	1.59142e-11	0.0521	-1.25358e-13	-5.80074e-13
0.2522	1.71305e-11	-1.47746e-11	4.47524e-13	1.18848e-11	0.0522	1.4351e-12	-1.10875e-12
0.2523	1.93422e-11	-1.30897e-11	-1.01826e-12	6.26842e-12	0.0523	1.04223e-12	-1.27115e-12
0.2524	1.83394e-11	-1.37649e-11	5.20638e-12	1.87277e-12	0.0524	8.93256e-13	-2.04372e-12
0.2525	1.71331e-11	-1.56201e-11	9.84411e-12	5.65582e-12	0.0525	4.28399e-12	-2.2056e-12
0.2526	1.73103e-11	-1.73532e-11	1.22846e-11	4.67814e-12	0.0526	4.8667e-12	-1.5125e-12
0.2527	1.69993e-11	-1.63194e-11	1.74106e-11	6.87428e-12	0.0527	1.17645e-12	-8.63684e-14
0.2528	1.66475e-11	-1.51228e-11	3.25464e-11	1.04132e-11	0.0528	-5.61229e-13	4.86e-13
0.2529	1.75571e-11	-1.46586e-11	3.10806e-11	1.27314e-11	0.0529	2.63943e-13	-1.61512e-13
0.253	1.53336e-11	-1.48048e-11	2.58306e-11	2.57918e-11	0.053	7.22248e-13	6.56782e-13
0.2531	1.29067e-11	-1.40965e-11	2.13131e-11	2.76217e-11	0.0531	3.25331e-13	6.21652e-13
0.2532	1.2799e-11	-1.48123e-11	1.80162e-11	2.00523e-11	0.0532	4.15942e-13	-1.85372e-12
0.2533	1.45225e-11	-1.55282e-11	1.44752e-11	1.82201e-11	0.0533	-1.20322e-12	-2.13052e-12
0.2534	1.49438e-11	-1.75461e-11	1.10563e-11	1.52893e-11	0.0534	-1.23626e-12	-4.52804e-13
0.2535	1.19879e-11	-1.67564e-11	7.75947e-12	1.18702e-11	0.0535	1.94761e-13	3.71925e-13
0.2536	1.05375e-11	-1.62515e-11	1.47165e-11	8.20694e-12	0.0536	-8.16398e-13	-7.54856e-13
0.2537	1.07147e-11	-1.53805e-11	2.2406e-11	5.52027e-12	0.0537	8.57208e-13	-3.10065e-12
0.2538	1.4432e-11	-1.59336e-11	2.09402e-11	3.07774e-12	0.0538	-8.87935e-13	-1.53843e-12
0.2539	1.50975e-11	-1.64866e-11	1.42254e-11	6.37251e-12	0.0539	-1.53524e-12	-2.6599e-12
0.254	1.58036e-11	-1.60632e-11	1.14169e-11	9.30108e-12	0.054	2.58108e-13	-2.31464e-12
0.2541	1.10573e-11	-1.4297e-11	1.38573e-11	1.10089e-11	0.0541	1.68457e-12	-6.2469e-13
0.2542	6.14831e-12	-1.68438e-11	1.56874e-11	8.44434e-12	0.0542	1.27934e-12	-7.63888e-13
0.2543	8.48207e-12	-2.11404e-11	1.4832e-11	4.90318e-12	0.0543	1.23975e-12	-1.51151e-12
0.2544	1.11821e-11	-2.19376e-11	1.50752e-11	5.14619e-12	0.0544	-2.10465e-14	-9.14492e-13
0.2545	1.2051e-11	-1.74045e-11	1.4708e-11	8.68511e-12	0.0545	-6.15445e-14	2.00374e-12
0.2546	1.27572e-11	-1.36037e-11	1.4463e-11	1.34447e-11	0.0546	1.36249e-12	3.33683e-12
0.2547	1.43993e-11	-1.17968e-11	1.37296e-11	1.28332e-11	0.0547	1.56562e-12	1.61992e-12
0.2548	1.17282e-11	-1.38554e-11	1.4339e-11	1.02686e-11	0.0548	1.81816e-13	-9.52806e-14
0.2549	9.34189e-12	-1.85589e-11	1.67795e-11	8.3144e-12	0.0549	-7.13587e-13	6.32625e-13
0.255	7.56597e-12	-2.05361e-11	2.36145e-11	5.7498e-12	0.055	8.32681e-13	4.04774e-12
0.2551	8.23147e-12	-2.08451e-11	1.95852e-11	6.72524e-12	0.0551	2.37932e-12	1.84924e-12
0.2552	1.06466e-11	-1.73698e-11	1.65325e-11	1.01421e-11	0.0552	3.56025e-12	-7.13866e-13
0.2553	1.09459e-11	-1.56442e-11	1.43343e-11	1.0141e-11	0.0553	3.52109e-12	-1.93268e-12
0.2554	1.38493e-11	-1.53428e-11	1.36009e-11	6.96601e-12	0.0554	-1.03394e-12	-4.64482e-13
0.2555	1.58169e-11	-1.79304e-11	1.40883e-11	6.35453e-12	0.0555	-3.1467e-12	6.38905e-13
0.2556	1.35934e-11	-2.05994e-11	7.00723e-12	8.30653e-12	0.0556	-9.86035e-13	-9.41945e-13
0.2557	1.02306e-11	-1.81414e-11	4.44281e-12	9.40404e-12	0.0557	6.87411e-13	-3.24314e-13
0.2558	8.73951e-12	-1.88166e-11	6.15085e-12	1.16002e-11	0.0558	2.85029e-12	3.22416e-12
0.2559	8.46912e-12	-1.85559e-11	6.63819e-12	1.47729e-11	0.0559	2.20681e-12	3.35574e-12
0.256	1.0925e-11	-1.73186e-11	9.56693e-12	1.526e-11	0.056	9.54383e-13	-1.51652e-12
0.2561	1.33808e-11	-2.01097e-11	1.06646e-11	1.28175e-11	0.0561	1.65661e-12	-3.94639e-12
0.2562	1.32732e-11	-2.11917e-11	1.18844e-11	1.24502e-11	0.0562	2.48253e-12	-3.56771e-12
0.2563	1.24739e-11	-1.99137e-11	1.74987e-11	1.33035e-11	0.0563	1.35701e-12	-2.45571e-12
0.2564	8.94826e-12	-1.74964e-11	1.83522e-11	1.34245e-11	0.0564	-3.77053e-13	-1.34286e-12
0.2565	9.93928e-12	-1.62592e-11	1.24919e-11	1.40337e-11	0.0565	1.18667e-12	-1.32778e-12
0.2566	7.34957e-12	-1.8155e-11	1.12703e-11	1.58637e-11	0.0566	2.75236e-12	-3.14294e-12
0.2567	1.46394e-12	-1.96847e-11	1.55418e-11	1.25666e-11	0.0567	3.58771e-12	-2.02764e-12
0.2568	-1.49197e-13	-1.84881e-11	1.70057e-11	8.41512e-12	0.0568	2.96036e-12	-1.64406e-12
0.2569	9.23202e-13	-1.70067e-11	1.81034e-11	1.52499e-11	0.0569	2.94552e-12	-5.27429e-13
0.257	3.54181e-12	-1.71528e-11	1.68817e-11	1.89109e-11	0.057	1.10185e-12	3.45641e-13
0.2571	5.26522e-12	-1.72583e-11	1.70028e-11	1.95201e-11	0.0571	2.31219e-12	-6.11795e-13
0.2572	4.30312e-12	-1.84217e-11	1.90771e-11	2.23266e-11	0.0572	3.28069e-12	-2.66736e-12
0.2573	3.95136e-12	-1.84052e-11	2.21279e-11	2.07386e-11	0.0573	2.1763e-12	-4.11213e-12
0.2574	4.7796e-12	-1.76969e-11	2.28594e-11	1.79299e-11	0.0574	3.88187e-12	-4.33577e-12
0.2575	4.67198e-12	-1.73141e-11	2.16377e-11	1.76846e-11	0.0575	4.12497e-12	5.67931e-13
0.2576	6.76163e-12	-1.42865e-11	1.98057e-11	1.91483e-11	0.0576	2.78349e-12	2.05405e-12
0.2577	6.20642e-12	-1.23575e-11	2.11476e-11	1.80486e-11	0.0577	1.56647e-12	1.95365e-12
0.2578	2.84359e-12	-1.19747e-11	2.06583e-11	1.64605e-11	0.0578	1.20626e-12	-1.3202e-12
0.2579	2.57321e-12	-1.35043e-11	2.30988e-11	1.31635e-11	0.0579	2.80149e-12	-2.64058e-12
0.258	4.29664e-12	-1.80043e-11	2.01682e-11	7.79128e-12	0.058	2.20169e-12	-5.44044e-14
0.2581	5.9387e-12	-2.1772e-11	2.38293e-11	9.86535e-12	0.0581	1.97029e-12	9.06046e-14
0.2582	7.7842e-12	-2.38306e-11	2.37063e-11	1.36484e-11	0.0582	2.76171e-13	-6.18687e-13
0.2583	6.00829e-12	-2.11692e-11	1.93108e-11	1.41356e-11	0.0583	-4.39346e-13	-1.44988e-12
0.2584	3.70341e-12	-1.8467e-11	1.93099e-11	1.23034e-11	0.0584	-9.08789e-13	3.83808e-14
0.2585	1.60197e-12	-1.93049e-11	2.21166e-11	8.15187e-12	0.0585	-1.37642e-12	-1.82238e-13
0.2586	1.04675e-12	-1.95732e-11	2.28481e-11	6.31969e-12	0.0586	1.45359e-12	-1.37936e-12
0.2587	7.3566e-13	-2.04518e-11	2.01616e-11	6.80685e-12	0.0587	2.82039e-12	-2.21026e-12
0.2588	2.78463e-12	-1.90924e-11	1.85737e-11	9.85749e-12	0.0588	2.84594e-12	-1.69843e-12
0.2589	2.75839e-12	-1.77738e-11	2.02817e-11	1.08329e-11	0.0589	6.53323e-14	5.22264e-13
0.259	2.89489e-12	-1.64958e-11	2.46753e-11	7.90211e-12	0.059	-2.83775e-14	2.25454e-12
0.2591	3.84524e-12	-1.68861e-11	2.30875e-11	3.7506e-12	0.0591	3.67466e-13	2.88802e-12
0.2592	3.29001e-12	-1.76834e-11	2.10113e-11	3.13913e-12	0.0592	1.54146e-13	1.20196e-12
0.2593	4.97276e-12	-1.77889e-11	1.96676e-11	3.74835e-12	0.0593	6.40226e-14	2.48098e-13
0.2594	9.42244e-12	-1.7284e-11	1.60046e-11	4.23551e-12	0.0594	1.806e-12	-4.6185e-13
0.2595	1.00879e-11	-1.82033e-11	1.17312e-11	7.16407e-12	0.0595	1.10753e-12	6.58994e-13
0.2596	1.96436e-12	-1.90412e-11	1.33171e-11	5.20982e-12	0.0596	-6.88713e-13	-1.88255e-12
0.2597	-7.70544e-12	-1.96757e-11	1.73445e-11	4.47628e-12	0.0597	-1.26348e-12	-4.66852e-12
0.2598	-6.59237e-12	-2.67799e-11	1.92967e-11	-5.29726e-13	0.0598	4.81805e-13	-4.40298e-12
0.2599	-3.03789e-12	-2.83909e-11	1.7953e-11	-4.68124e-12	0.0599	2.10565e-12	-2.18458e-12
0.26	-3.51171e-12	-2.27591e-11	1.4412e-11	-8.34447e-12	0.06	2.14312e-12	-1.55336e-12
0.2601	-3.13104e-12	-1.82259e-11	1.19696e-11	-1.02987e-11	0.0601	2.059e-12	-2.02104e-12
0.2602	-1.00071e-12	-1.589e-11	8.30658e-12	-8.835e-12	0.0602	3.19602e-12	-1.87859e-12
0.2603	-1.35247e-12	-1.65245e-11	1.30664e-11	-1.0423e-11	0.0603	3.60096e-12	-2.73887e-14
0.2604	-2.39597e-12	-2.017e-11	2.11221e-11	-1.49408e-11	0.0604	2.54138e-12	1.2132e-12
0.2605	-2.01531e-12	-2.06417e-11	2.79571e-11	-1.28667e-11	0.0605	3.80137e-12	-3.54137e-13
0.2606	-2.16362e-12	-2.09913e-11	2.23409e-11	-4.56704e-12	0.0606	3.59666e-12	-2.65421e-12
0.2607	-9.69154e-13	-1.77196e-11	1.80675e-11	1.7795e-12	0.0607	2.41549e-12	-3.36773e-12
0.2608	-2.70438e-12	-1.61568e-11	1.86769e-11	5.31841e-12	0.0608	-2.30498e-13	-2.61678e-12
0.2609	-1.99821e-12	-1.84595e-11	2.07511e-11	2.63174e-12	0.0609	-3.73096e-12	-2.96481e-12
0.261	-1.94307e-12	-2.05588e-11	1.92854e-11	-2.99073e-13	0.061	-1.86038e-12	-4.04562e-12
0.2611	-8.29996e-13	-2.47334e-11	2.80493e-12	-7.88477e-13	0.0611	1.01447e-14	-1.46468e-12
0.2612	6.90007e-13	-2.43099e-11	-8.58128e-13	9.19383e-13	0.0612	1.6364e-12	-4.71047e-13
0.2613	1.84379e-12	-2.08753e-11	4.26788e-12	-8.11494e-12	0.0613	1.1873e-12	-1.67512e-12
0.2614	1.69546e-12	-2.02077e-11	1.14691e-11	-1.99569e-11	0.0614	-4.82652e-13	-1.29272e-12
0.2615	-4.46664e-13	-2.07201e-11	1.57406e-11	-1.54414e-11	0.0615	-9.32096e-13	3.09918e-13
0.2616	-4.72887e-13	-2.04187e-11	1.74486e-11	-1.15363e-11	0.0616	5.71352e-13	1.05765e-12
0.2617	-2.08606e-12	-1.69028e-11	1.32973e-11	-7.02081e-12	0.0617	1.58624e-12	7.06331e-13
0.2618	-4.47234e-12	-1.8351e-11	1.46391e-11	-5.31295e-12	0.0618	2.81478e-13	-1.47645e-12
0.2619	-5.19031e-12	-2.07759e-11	1.48823e-11	-4.70372e-12	0.0619	1.97073e-13	-3.41549e-12
0.262	-1.79858e-12	-2.12476e-11	1.31724e-11	1.03246e-12	0.062	1.45505e-12	-2.30316e-12
0.2621	-3.12692e-12	-2.18413e-11	1.56129e-11	1.39755e-12	0.0621	3.93244e-13	-3.36709e-13
0.2622	-4.74006e-12	-2.45917e-11	2.00065e-11	-3.85259e-12	0.0622	1.85399e-13	-1.54448e-12
0.2623	-4.96975e-12	-2.66503e-11	1.9151e-11	-7.39376e-12	0.0623	-2.30415e-14	-3.60716e-12
0.2624	1.35165e-12	-2.53317e-11	1.69528e-11	-8.49352e-12	0.0624	1.11063e-12	-5.42614e-12
0.2625	6.53376e-12	-2.57627e-11	1.52429e-11	-7.64015e-12	0.0625	7.78738e-13	-4.43796e-12
0.2626	1.13643e-12	-2.37116e-11	1.26785e-11	-6.90885e-12	0.0626	5.68144e-13	-2.10745e-12
0.2627	-5.31885e-12	-2.3695e-11	1.38982e-11	-9.59552e-12	0.0627	7.22955e-13	-8.76008e-13
0.2628	-6.44373e-12	-2.50619e-11	1.524e-11	-1.06953e-11	0.0628	-9.54164e-13	2.43023e-12
0.2629	-3.94718e-12	-2.52081e-11	1.71922e-11	-9.10948e-12	0.0629	-8.01173e-13	6.46848e-12
0.263	-1.93891e-12	-2.47846e-11	1.54823e-11	-5.20436e-12	0.063	4.49406e-13	2.93791e-12
0.2631	-2.98242e-12	-2.39949e-11	1.05985e-11	-4.7172e-12	0.0631	7.2232e-13	-2.18007e-12
0.2632	-4.22935e-12	-2.18625e-11	4.49409e-12	-5.45075e-12	0.0632	2.70304e-12	-3.51444e-12
0.2633	-2.91281e-12	-2.21714e-11	-2.46486e-12	-5.3298e-12	0.0633	2.24112e-12	-3.1405e-12
0.2634	-7.82498e-13	-2.39452e-11	-2.46581e-12	-3.49987e-12	0.0634	6.79231e-13	-5.70043e-13
0.2635	-1.25632e-12	-2.32369e-11	1.56157e-12	-4.23342e-12	0.0635	-1.12824e-12	1.63336e-12
0.2636	-3.96812e-12	-2.21217e-11	-5.14571e-13	-5.08903e-12	0.0636	9.69002e-13	1.39443e-12
0.2637	-3.30262e-12	-2.14134e-11	-1.61415e-12	2.11199e-12	0.0637	1.34956e-13	-9.20718e-13
0.2638	-2.96265e-12	-2.12341e-11	1.07046e-12	-6.9675e-13	0.0638	-2.28764e-12	-2.13837e-12
0.2639	-2.62269e-12	-1.99561e-11	-2.73264e-13	7.66972e-13	0.0639	-8.05658e-13	-2.13654e-12
0.264	1.58699e-13	-2.16078e-11	-3.96277e-13	6.43776e-13	0.064	-1.79873e-13	-2.25808e-12
0.2641	1.43453e-12	-2.43175e-11	3.352e-13	2.76441e-13	0.0641	-1.50895e-12	-1.40443e-12
0.2642	2.01865e-12	-2.37312e-11	7.00467e-13	2.10637e-12	0.0642	-2.76277e-13	-2.13916e-12
0.2643	-2.8623e-13	-2.4976e-11	2.65265e-12	5.15701e-12	0.0643	1.07672e-12	-1.89887e-12
0.2644	-1.94008e-12	-2.65057e-11	5.45932e-12	2.59241e-12	0.0644	1.08518e-12	4.15019e-13
0.2645	-3.83806e-12	-2.70181e-11	1.21722e-11	-2.4136e-12	0.0645	3.59469e-13	-9.34902e-13
0.2646	-3.62018e-12	-2.65132e-11	1.52231e-11	-4.9782e-12	0.0646	-4.9005e-13	-3.8735e-12
0.2647	-5.94661e-13	-2.58049e-11	9.72895e-12	-3.75862e-12	0.0647	-7.30946e-13	-3.02973e-12
0.2648	-1.14985e-12	-2.44863e-11	5.21141e-12	-9.76357e-14	0.0648	8.57476e-13	-2.9203e-12
0.2649	-1.18158e-13	-2.28421e-11	7.04152e-12	1.24401e-12	0.0649	-1.19293e-13	-4.15559e-12
0.265	2.37838e-12	-2.25407e-11	8.26127e-12	5.63742e-12	0.065	-1.21979e-12	-3.92803e-12
0.2651	3.12526e-12	-2.464e-11	8.3824e-12	7.58942e-12	0.0651	3.63653e-13	-3.94662e-12
0.2652	2.44799e-12	-2.58034e-11	6.79454e-12	6.12345e-12	0.0652	6.02779e-13	-2.50236e-12
0.2653	3.87225e-13	-2.54613e-11	5.45083e-12	3.803e-12	0.0653	9.62498e-13	2.82699e-13
0.2654	-2.0869e-13	-2.50379e-11	5.20574e-12	4.04601e-12	0.0654	-1.44006e-13	8.68532e-13
0.2655	1.06718e-12	-2.31089e-11	2.27511e-12	5.02145e-12	0.0655	-1.37388e-12	3.53842e-13
0.2656	-2.61152e-13	-2.0366e-11	6.87252e-13	9.659e-12	0.0656	-7.73913e-13	-2.60409e-12
0.2657	-2.11846e-12	-2.12853e-11	2.27322e-12	1.29538e-11	0.0657	-5.41274e-13	-3.1224e-12
0.2658	-2.87714e-12	-2.42391e-11	9.35236e-12	1.06333e-11	0.0658	-1.87603e-13	-3.52037e-12
0.2659	-3.79855e-12	-2.80474e-11	1.16708e-11	6.72594e-12	0.0659	1.38578e-12	-2.211e-12
0.266	-2.97029e-12	-2.91702e-11	6.78699e-12	5.50411e-12	0.066	5.16787e-13	-9.03148e-13
0.2661	-1.4096e-12	-2.83805e-11	5.80949e-12	7.57818e-12	0.0661	-1.08998e-13	-1.06158e-12
0.2662	-1.06965e-12	-2.36032e-11	2.87886e-12	3.67081e-12	0.0662	-2.32261e-12	-1.09925e-12
0.2663	-3.29315e-12	-2.01279e-11	5.8076e-12	-6.02772e-13	0.0663	-1.72945e-12	-4.67812e-12
0.2664	-5.23183e-12	-2.07624e-11	9.22462e-12	3.18028e-12	0.0664	-7.70881e-13	-4.22968e-12
0.2665	-6.43809e-12	-2.02575e-11	5.68364e-12	7.08541e-12	0.0665	1.77389e-12	-1.82898e-12
0.2666	-5.08086e-12	-2.05665e-11	3.97371e-12	1.08685e-11	0.0666	2.48689e-12	-2.60282e-12
0.2667	-5.18848e-12	-2.46189e-11	-4.21762e-13	9.89078e-12	0.0667	1.61234e-12	-1.91238e-12
0.2668	-3.34297e-12	-2.40327e-11	-2.61997e-12	1.12324e-11	0.0668	2.48935e-13	-1.58854e-12
0.2669	-1.37538e-12	-2.34871e-11	5.52912e-13	1.22079e-11	0.0669	1.05726e-13	8.10244e-13
0.267	-1.76787e-12	-2.24533e-11	7.99826e-12	6.83565e-12	0.067	3.25798e-12	2.59859e-12
0.2671	-1.46859e-12	-2.43899e-11	1.38567e-11	-1.23483e-13	0.0671	3.60221e-12	1.09107e-12
0.2672	-2.51206e-12	-2.81168e-11	1.71516e-11	9.74025e-13	0.0672	3.98726e-14	4.38203e-13
0.2673	-4.45075e-12	-3.03788e-11	1.56859e-11	3.0481e-12	0.0673	7.49725e-13	-2.16751e-12
0.2674	-7.24392e-12	-2.84498e-11	1.01917e-11	6.34287e-12	0.0674	6.04867e-13	-2.69763e-12
0.2675	-8.65361e-12	-2.47305e-11	9.94666e-12	8.53901e-12	0.0675	-3.20228e-12	-2.61688e-12
0.2676	-8.23227e-12	-2.55277e-11	1.32416e-11	6.82891e-12	0.0676	-2.61502e-12	-2.41343e-12
0.2677	-7.64815e-12	-2.73422e-11	1.2142e-11	5.97329e-12	0.0677	2.91484e-13	-1.34045e-13
0.2678	-5.55852e-12	-2.96449e-11	9.45555e-12	9.63428e-12	0.0678	3.80831e-12	-2.95181e-13
0.2679	-6.2358e-12	-2.89366e-11	1.05532e-11	9.99936e-12	0.0679	2.56437e-12	-6.99459e-13
0.268	-1.01302e-12	-2.5909e-11	9.45366e-12	1.04865e-11	0.068	-1.36511e-12	5.00091e-12
0.2681	6.69728e-13	-2.22303e-11	1.17721e-11	9.87504e-12	0.0681	-9.00021e-13	4.72104e-12
0.2682	-2.97793e-12	-2.03827e-11	1.72643e-11	1.06063e-11	0.0682	2.00654e-12	2.61137e-12
0.2683	-4.0621e-12	-2.2482e-11	2.14137e-11	1.28025e-11	0.0683	3.32629e-12	7.47109e-13
0.2684	-3.43731e-12	-2.55986e-11	2.11686e-11	1.51207e-11	0.0684	3.42547e-12	7.15148e-13
0.2685	-4.48081e-12	-2.75351e-11	2.27546e-11	1.82934e-11	0.0685	2.67026e-12	8.06527e-13
0.2686	-5.28017e-12	-2.51178e-11	1.66501e-11	2.02454e-11	0.0686	-6.48294e-13	6.55024e-13
0.2687	-7.21885e-12	-2.13984e-11	1.09119e-11	2.10988e-11	0.0687	-6.04733e-14	-1.57039e-12
0.2688	-8.05888e-12	-2.13818e-11	8.95783e-12	1.62148e-11	0.0688	5.27491e-13	-1.71934e-12
0.2689	-6.17269e-12	-2.18535e-11	1.21307e-11	4.12875e-12	0.0689	-7.15464e-13	-8.90501e-13
0.269	-3.35061e-12	-1.67914e-11	1.4327e-11	-3.68487e-12	0.069	-1.95829e-12	7.94055e-13
0.2691	-1.62718e-12	-1.30313e-11	1.05419e-11	-4.9067e-12	0.0691	-2.46857e-12	3.83599e-14
0.2692	-2.26379e-12	-7.5216e-12	1.09072e-11	4.36952e-12	0.0692	2.39238e-12	-1.08244e-12
0.2693	-3.1852e-12	-2.01186e-12	1.37139e-11	8.51878e-12	0.0693	2.12649e-12	-1.46975e-12
0.2694	-2.03144e-12	2.56201e-12	2.7751e-11	2.04794e-12	0.0694	-4.58593e-13	-2.58846e-12
0.2695	9.94065e-13	6.32206e-12	4.20323e-11	-8.82875e-13	0.0695	7.40684e-13	-2.4855e-12
0.2696	3.61271e-12	9.838e-12	3.4463e-11	4.48709e-12	0.0696	3.16084e-12	-1.03884e-12
0.2697	1.67403e-12	1.5185e-11	2.78702e-11	2.21862e-11	0.0697	2.40735e-12	-1.54442e-12
0.2698	3.31607e-12	2.31361e-11	2.05451e-11	2.32837e-11	0.0698	-2.99073e-13	-1.1947e-12
0.2699	5.32433e-12	2.89714e-11	1.74924e-11	1.51038e-11	0.0699	-5.63887e-13	-2.06494e-12
0.27	7.21053e-12	2.70755e-11	1.70031e-11	1.14406e-11	0.07	7.58448e-13	-2.44618e-12
0.2701	1.08057e-11	2.48135e-11	1.46829e-11	9.7305e-12	0.0701	2.49961e-13	-1.11778e-12
0.2702	1.59471e-11	2.51555e-11	1.51702e-11	6.55555e-12	0.0702	-1.11273e-12	8.91839e-14
0.2703	1.5514e-11	2.76542e-11	1.52913e-11	6.06614e-12	0.0703	-1.25441e-12	-2.90165e-13
0.2704	1.40636e-11	3.30419e-11	1.10179e-11	5.3326e-12	0.0704	-9.07456e-13	-1.40132e-12
0.2705	1.3956e-11	3.54999e-11	1.22377e-11	3.37835e-12	0.0705	-4.38021e-13	1.2723e-12
0.2706	1.24649e-11	3.67778e-11	1.69975e-11	4.59792e-12	0.0706	-9.01978e-14	-6.92115e-13
0.2707	1.21131e-11	3.79337e-11	2.21235e-11	3.98645e-12	0.0707	1.47881e-12	-1.80143e-12
0.2708	6.10543e-12	3.68517e-11	2.4686e-11	3.00877e-12	0.0708	2.438e-12	-2.17767e-12
0.2709	3.59708e-12	3.71938e-11	2.32202e-11	6.79182e-12	0.0709	3.64188e-12	-1.45465e-12
0.271	4.87293e-12	3.92042e-11	1.94351e-11	1.03307e-11	0.071	3.74775e-12	-2.42716e-13
0.2711	4.80598e-12	4.12959e-11	1.76031e-11	9.71926e-12	0.0711	2.75569e-12	-1.10533e-12
0.2712	1.85006e-12	3.85863e-11	1.9067e-11	8.74157e-12	0.0712	1.64233e-12	-2.58303e-13
0.2713	4.10246e-12	3.62428e-11	2.13854e-11	9.83908e-12	0.0713	2.85619e-13	-5.09216e-13
0.2714	8.91837e-12	3.37773e-11	1.99196e-11	1.15469e-11	0.0714	2.836e-12	2.17132e-13
0.2715	1.20659e-11	3.24918e-11	1.67448e-11	1.39872e-11	0.0715	2.33548e-12	1.18835e-12
0.2716	1.0819e-11	3.51125e-11	1.41804e-11	1.25213e-11	0.0716	2.48996e-13	1.06174e-12
0.2717	7.57823e-12	3.78147e-11	1.66209e-11	1.11774e-11	0.0717	-3.71612e-13	-8.95051e-13
0.2718	3.93057e-12	3.34774e-11	1.88172e-11	7.14792e-12	0.0718	-1.45569e-14	-1.63019e-12
0.2719	1.91051e-12	3.07677e-11	2.12577e-11	8.97785e-12	0.0719	9.54016e-13	-1.67059e-13
0.272	-2.72297e-13	2.87091e-11	2.08905e-11	5.55875e-12	0.072	4.5893e-13	1.05304e-12
0.2721	1.89739e-13	2.77084e-11	2.01571e-11	9.09767e-12	0.0721	3.31284e-13	2.27437e-12
0.2722	1.18078e-12	2.99223e-11	1.58837e-11	1.42235e-11	0.0722	5.71106e-13	8.11491e-13
0.2723	2.17178e-12	3.07526e-11	1.22207e-11	1.62976e-11	0.0723	1.78877e-12	-5.27893e-13
0.2724	3.00002e-12	3.33734e-11	1.83233e-11	1.87379e-11	0.0724	1.78704e-12	-1.7437e-12
0.2725	3.25859e-12	2.93616e-11	2.17403e-11	1.36098e-11	0.0725	1.99674e-13	-1.98138e-12
0.2726	4.53445e-12	2.6001e-11	2.18614e-11	1.15335e-11	0.0726	-4.36014e-14	-1.36294e-12
0.2727	5.97306e-12	2.64651e-11	1.50245e-11	1.54386e-11	0.0727	2.15587e-12	-2.54527e-13
0.2728	7.33029e-12	3.19342e-11	1.06291e-11	1.59257e-11	0.0728	2.40356e-12	7.33573e-13
0.2729	5.92058e-12	3.39445e-11	1.16047e-11	1.73895e-11	0.0729	1.06574e-12	2.08969e-12
0.273	-6.16083e-13	3.15197e-11	1.68528e-11	1.36042e-11	0.073	-1.48585e-13	3.08143e-12
0.2731	-1.86301e-12	2.80776e-11	1.90491e-11	8.35401e-12	0.0731	5.9164e-13	1.63366e-12
0.2732	-5.46495e-13	2.68328e-11	1.85599e-11	5.4232e-12	0.0732	2.18776e-12	-4.22509e-13
0.2733	-3.66521e-12	2.71749e-11	2.12445e-11	9.4504e-12	0.0733	4.39562e-12	8.19155e-13
0.2734	-6.01078e-12	2.79239e-11	2.0389e-11	1.60411e-11	0.0734	1.96621e-12	5.97907e-13
0.2735	-3.5142e-12	2.69232e-11	2.08764e-11	1.65282e-11	0.0735	2.706e-13	-2.31826e-13
0.2736	-2.31977e-12	2.42136e-11	1.90444e-11	1.59168e-11	0.0736	-2.02935e-13	-1.18185e-12
0.2737	-3.48532e-12	2.29281e-11	1.95317e-11	1.57936e-11	0.0737	1.1559e-12	-2.13014e-12
0.2738	-5.01708e-12	2.16426e-11	2.08735e-11	1.49379e-11	0.0738	5.62861e-13	-2.3444e-12
0.2739	-3.61918e-12	2.09674e-11	1.78208e-11	1.49368e-11	0.0739	9.47584e-13	-9.70211e-13
0.274	-2.46541e-12	2.11874e-11	1.68433e-11	1.68888e-11	0.074	3.28655e-12	1.61254e-13
0.2741	-2.08477e-12	2.23026e-11	1.6232e-11	2.00615e-11	0.0741	2.20857e-12	5.61608e-13
0.2742	-2.35513e-12	2.21564e-11	1.29352e-11	2.20135e-11	0.0742	-1.67608e-12	-2.08861e-12
0.2743	-1.73033e-12	2.38006e-11	1.23239e-11	2.22565e-11	0.0743	4.21546e-13	-2.17429e-12
0.2744	-2.57037e-12	2.3451e-11	1.25671e-11	1.67623e-11	0.0744	2.03166e-12	-7.94195e-13
0.2745	-4.99734e-12	2.17993e-11	1.04909e-11	1.37094e-11	0.0745	2.54384e-12	1.44118e-12
0.2746	-4.16909e-12	2.13683e-11	1.23211e-11	1.24875e-11	0.0746	9.81409e-13	-1.81599e-12
0.2747	-3.74773e-12	2.47621e-11	1.09773e-11	1.07774e-11	0.0747	1.00643e-12	-1.16643e-12
0.2748	-4.0588e-12	2.14014e-11	1.17088e-11	1.1997e-11	0.0748	1.64228e-12	-2.82743e-14
0.2749	-3.39331e-12	1.55586e-11	1.46376e-11	9.9207e-12	0.0749	4.47451e-13	-1.20929e-12
0.275	-3.17542e-12	1.5209e-11	1.58573e-11	9.7975e-12	0.075	-8.69141e-13	-1.77992e-12
0.2751	-4.50375e-12	1.38421e-11	1.30488e-11	1.28481e-11	0.0751	-2.32366e-13	-1.37411e-12
0.2752	-8.02932e-12	1.45504e-11	1.19492e-11	1.32132e-11	0.0752	1.25908e-12	-1.14091e-13
0.2753	-8.95075e-12	1.60725e-11	1.08496e-11	1.37004e-11	0.0753	-3.01106e-13	2.91035e-13
0.2754	-1.11743e-11	1.51532e-11	1.32901e-11	1.5042e-11	0.0754	-6.40526e-13	-1.13543e-12
0.2755	-1.22178e-11	1.39084e-11	1.6585e-11	1.49188e-11	0.0755	-7.35819e-13	-6.09401e-13
0.2756	-1.04129e-11	1.2216e-11	1.31661e-11	1.22322e-11	0.0756	1.97646e-12	-2.40342e-12
0.2757	-5.06809e-12	1.23953e-11	1.31652e-11	1.05221e-11	0.0757	3.46796e-12	-1.39063e-12
0.2758	-2.32739e-12	1.45685e-11	1.29201e-11	1.43051e-11	0.0758	8.08987e-13	7.19896e-13
0.2759	-4.71367e-12	1.88982e-11	7.42597e-12	1.69895e-11	0.0759	-1.97214e-12	1.85288e-12
0.276	-6.57095e-12	1.95658e-11	3.03049e-12	1.72326e-11	0.076	-1.70157e-12	1.77209e-13
0.2761	-5.66133e-12	1.94603e-11	6.08131e-12	1.39355e-11	0.0761	1.37658e-12	4.53592e-13
0.2762	-5.5655e-12	1.80934e-11	1.12073e-11	1.22254e-11	0.0762	2.7457e-12	2.40596e-13
0.2763	-1.15325e-11	1.72148e-11	1.16947e-11	1.33229e-11	0.0763	3.01614e-12	-1.6825e-12
0.2764	-1.68485e-11	1.80859e-11	9.74058e-12	1.63736e-11	0.0764	2.34723e-13	-4.82742e-12
0.2765	-1.41891e-11	1.58238e-11	1.10824e-11	1.86918e-11	0.0765	-2.42475e-12	-2.84651e-12
0.2766	-1.05126e-11	1.65728e-11	1.25463e-11	1.77141e-11	0.0766	-1.78844e-12	-2.57568e-12
0.2767	-8.26019e-12	1.66301e-11	5.70943e-12	1.29522e-11	0.0767	1.41124e-12	-1.81763e-12
0.2768	-7.83882e-12	1.73791e-11	-2.88135e-14	9.53314e-12	0.0768	2.04733e-12	-1.793e-12
0.2769	-9.28922e-12	1.89419e-11	2.53372e-12	6.23611e-12	0.0769	2.43916e-12	-2.86798e-12
0.277	-9.72238e-12	1.86736e-11	6.68316e-12	3.42737e-12	0.077	1.24396e-12	-3.4556e-12
0.2771	-8.52791e-12	1.7266e-11	9.00156e-12	5.01316e-12	0.0771	2.24591e-12	-4.16618e-12
0.2772	-7.98449e-12	1.97647e-11	7.4137e-12	1.14818e-11	0.0772	1.17256e-12	-1.82581e-12
0.2773	-9.10936e-12	1.92523e-11	2.16373e-12	1.61193e-11	0.0773	-1.44967e-13	-1.80552e-12
0.2774	-9.54251e-12	1.81702e-11	3.99384e-12	1.85596e-11	0.0774	-3.63887e-13	-2.88455e-12
0.2775	-7.04597e-12	1.61116e-11	4.84739e-12	1.52626e-11	0.0775	-2.90215e-12	-1.88905e-12
0.2776	-2.10802e-12	1.67385e-11	1.79469e-12	1.2698e-11	0.0776	-4.58592e-12	-1.99283e-12
0.2777	-6.69412e-13	1.67551e-11	-9.43672e-12	1.31851e-11	0.0777	-1.63103e-12	-6.32364e-13
0.2778	-2.73016e-12	1.49406e-11	-2.3842e-11	1.1475e-11	0.0778	1.56803e-12	-4.93139e-13
0.2779	-8.45299e-12	1.52828e-11	-1.79835e-11	5.24831e-12	0.0779	-3.59822e-13	-1.45301e-12
0.278	-1.12462e-11	1.40379e-11	-1.00499e-11	-9.03504e-12	0.078	7.64142e-13	-9.39413e-14
0.2781	-8.62756e-12	1.32407e-11	-6.75495e-12	-1.221e-11	0.0781	2.49852e-12	-8.10378e-13
0.2782	-7.02621e-12	1.21994e-11	-5.16898e-12	-5.37518e-12	0.0782	6.92917e-13	5.9848e-14
0.2783	-6.64552e-12	1.53084e-11	-4.19336e-12	1.16863e-13	0.0783	-7.46401e-13	9.29863e-13
0.2784	-1.0578e-11	1.89464e-11	-2.11911e-12	3.1675e-12	0.0784	9.8819e-13	1.18935e-12
0.2785	-1.60161e-11	1.62774e-11	1.90826e-12	4.87536e-12	0.0785	1.13594e-12	5.94181e-13
0.2786	-1.49437e-11	1.36084e-11	7.88877e-12	1.21212e-12	0.0786	1.40578e-12	-1.58807e-12
0.2787	-1.03719e-11	9.0677e-12	9.96302e-12	6.00651e-13	0.0787	1.18729e-12	-1.93942e-12
0.2788	-9.54367e-12	8.02634e-12	4.59098e-12	3.65128e-12	0.0788	3.58341e-13	-3.38966e-12
0.2789	-1.05058e-11	1.03216e-11	1.41621e-12	6.21364e-12	0.0789	2.21476e-12	-6.89772e-13
0.279	-1.3299e-11	1.15588e-11	1.6594e-12	3.52697e-12	0.079	2.11781e-12	-1.87486e-13
0.2791	-1.14128e-11	1.2023e-11	4.09987e-12	-2.58338e-13	0.0791	2.50885e-12	-7.84185e-13
0.2792	-8.46862e-12	1.43589e-11	3.73271e-12	-5.38642e-12	0.0792	2.28916e-12	-2.23573e-12
0.2793	-1.11804e-11	1.62472e-11	4.58626e-12	-9.53793e-12	0.0793	2.55733e-12	-2.34489e-12
0.2794	-1.0108e-11	1.95597e-11	3.48668e-12	-8.56249e-12	0.0794	-7.1507e-13	4.75225e-13
0.2795	-8.50665e-12	2.62495e-11	-1.76329e-12	-1.01505e-11	0.0795	-6.92191e-13	6.09363e-13
0.2796	-7.71908e-12	3.25323e-11	-3.107e-12	-7.4661e-12	0.0796	-3.03799e-13	-8.43874e-13
0.2797	-8.3557e-12	3.31592e-11	-1.39896e-12	-5.39203e-12	0.0797	1.06036e-12	5.10041e-13
0.2798	-1.18406e-11	3.26061e-11	2.62842e-12	-4.53866e-12	0.0798	-3.84005e-13	-1.31038e-12
0.2799	-1.06461e-11	3.43724e-11	6.77786e-12	-5.15014e-12	0.0799	-1.58525e-12	-1.42246e-12
0.28	-9.53304e-12	3.57724e-11	2.50446e-12	-2.83193e-12	0.08	-2.42142e-12	5.39959e-13
0.2801	-9.27444e-12	3.76608e-11	6.72459e-13	-5.5186e-12	0.0801	-1.18366e-12	1.28089e-12
0.2802	-1.05621e-11	4.01594e-11	-5.79821e-12	-8.57148e-12	0.0802	5.26879e-14	-1.51906e-12
0.2803	-8.92004e-12	4.01353e-11	-6.0433e-12	-7.84018e-12	0.0803	1.88921e-13	-3.46544e-12
0.2804	-9.10904e-12	3.99484e-11	-7.14287e-12	-1.00386e-11	0.0804	-4.26239e-14	-2.97137e-12
0.2805	-1.10884e-11	3.88257e-11	-6.16725e-12	-1.30915e-11	0.0805	-3.97902e-13	-2.84458e-12
0.2806	-1.03415e-11	3.94119e-11	2.865e-12	-5.89043e-12	0.0806	-1.36527e-12	-1.9865e-12
0.2807	-8.45533e-12	3.82485e-11	4.45097e-12	-3.93843e-12	0.0807	-1.96822e-12	-1.00758e-12
0.2808	-1.16961e-11	3.89161e-11	-1.88642e-13	-6.99131e-12	0.0808	-2.45094e-12	-2.83757e-12
0.2809	-1.47741e-11	4.04789e-11	-2.14271e-12	8.76444e-14	0.0809	-1.22655e-12	-4.18061e-12
0.281	-1.43527e-11	4.06582e-11	-4.09678e-12	1.30722e-12	0.081	3.62084e-13	-2.83949e-12
0.2811	-1.53963e-11	3.92507e-11	-3.60944e-12	2.07469e-13	0.0811	4.83796e-13	-2.47633e-12
0.2812	-1.52597e-11	3.71107e-11	-3.73246e-12	1.67119e-12	0.0812	3.04477e-12	-1.50426e-12
0.2813	-1.29259e-11	3.70052e-11	-2.87891e-12	5.08803e-12	0.0813	3.16216e-12	-2.97506e-12
0.2814	-1.06328e-11	3.67776e-11	-1.29294e-12	5.9414e-12	0.0814	8.35971e-13	-2.12802e-12
0.2815	-1.31412e-11	3.76894e-11	1.70961e-13	3.86508e-12	0.0815	-3.20141e-12	-2.01494e-12
0.2816	-1.18247e-11	3.43693e-11	3.34385e-12	7.9778e-14	0.0816	-3.33474e-12	-4.22273e-12
0.2817	-6.52048e-12	3.227e-11	1.63392e-12	-3.8276e-12	0.0817	1.91829e-13	-4.35686e-12
0.2818	-5.0412e-12	3.26121e-11	4.12271e-13	-1.26524e-12	0.0818	1.76204e-13	-1.68488e-12
0.2819	-6.8578e-12	3.12452e-11	1.63203e-12	2.51781e-12	0.0819	4.02633e-13	-1.13006e-13
0.282	-8.30818e-12	3.26453e-11	2.11937e-12	6.42294e-12	0.082	-1.69228e-12	-1.22811e-12
0.2821	-9.63649e-12	3.45336e-11	4.55983e-12	3.00385e-12	0.0821	-3.66706e-12	-1.61218e-12
0.2822	-9.94758e-12	3.46316e-11	6.87822e-12	1.90409e-12	0.0822	-2.22572e-12	-1.14306e-12
0.2823	-9.52623e-12	3.2044e-11	5.53451e-12	5.19887e-12	0.0823	-1.75776e-13	3.01395e-13
0.2824	-1.12615e-11	3.07178e-11	1.38317e-12	4.83153e-12	0.0824	2.727e-12	1.13437e-12
0.2825	-1.35257e-11	2.8415e-11	-8.26158e-14	2.02279e-12	0.0825	1.72198e-12	-3.5301e-13
0.2826	-1.46098e-11	2.68447e-11	-9.38053e-13	1.28924e-12	0.0826	-9.93482e-13	-2.57372e-12
0.2827	-1.42699e-11	2.59661e-11	-1.18314e-12	3.48539e-12	0.0827	-1.87924e-12	-2.35378e-12
0.2828	-1.31568e-11	2.50468e-11	2.11182e-12	4.94911e-12	0.0828	-3.24821e-13	-2.25656e-12
0.2829	-1.21251e-11	2.4982e-11	2.47708e-12	6.41282e-12	0.0829	-2.36338e-13	-2.52606e-12
0.283	-1.07679e-11	2.5853e-11	2.35407e-12	9.09725e-12	0.083	-3.92917e-13	-2.42973e-12
0.2831	-1.03465e-11	2.79448e-11	-3.32421e-13	9.58441e-12	0.0831	-1.52685e-12	-1.60127e-12
0.2832	-1.22038e-11	3.51228e-11	-4.36168e-12	1.06819e-11	0.0832	-4.64118e-13	-8.95003e-13
0.2833	-1.23521e-11	3.54649e-11	-2.65364e-12	1.05587e-11	0.0833	7.20229e-13	-7.99138e-13
0.2834	-1.27446e-11	3.15753e-11	4.54756e-12	7.13963e-12	0.0834	1.90426e-12	2.73374e-13
0.2835	-1.28929e-11	2.80518e-11	6.13353e-12	7.38264e-12	0.0835	3.57637e-12	1.59019e-12
0.2836	-1.19833e-11	2.57897e-11	5.03395e-12	9.945e-12	0.0836	2.68495e-12	1.93072e-12
0.2837	-8.59153e-12	2.71491e-11	5.15508e-12	1.22632e-11	0.0837	1.5494e-12	1.90537e-12
0.2838	-9.63504e-12	2.67181e-11	6.00863e-12	1.28724e-11	0.0838	1.69868e-13	1.27007e-12
0.2839	-1.21841e-11	2.59615e-11	1.07684e-11	9.57542e-12	0.0839	-1.10813e-13	-8.29603e-13
0.284	-1.52214e-11	2.43505e-11	1.04013e-11	5.30183e-12	0.084	1.07365e-12	-3.41706e-12
0.2841	-1.76483e-11	2.0176e-11	4.54095e-12	3.59172e-12	0.0841	-5.49157e-13	-4.41703e-12
0.2842	-1.53552e-11	1.68153e-11	1.12204e-12	5.05544e-12	0.0842	-1.43908e-12	-2.36462e-12
0.2843	-1.48118e-11	1.79305e-11	-1.19824e-12	5.78674e-12	0.0843	6.01188e-13	-4.09579e-12
0.2844	-1.62215e-11	2.14057e-11	-9.55043e-13	4.44284e-12	0.0844	2.39787e-12	-3.01871e-12
0.2845	-1.5434e-11	2.0812e-11	4.29304e-12	2.12238e-12	0.0845	1.8758e-12	-3.40585e-12
0.2846	-1.6274e-11	1.7614e-11	5.5128e-12	4.07438e-12	0.0846	1.1509e-14	-2.44959e-12
0.2847	-1.11326e-11	1.55147e-11	1.36146e-12	3.58498e-12	0.0847	2.54233e-12	5.70945e-12
0.2848	-1.09554e-11	2.04955e-11	-2.17952e-12	3.46179e-12	0.0848	2.99852e-12	5.08005e-12
0.2849	-1.17954e-11	2.33196e-11	-4.25566e-12	5.41379e-12	0.0849	2.4787e-12	5.44943e-13
0.285	-1.43851e-11	2.12203e-11	-4.13454e-12	7.97614e-12	0.085	1.83736e-12	-2.15862e-12
0.2851	-1.72597e-11	1.99348e-11	-7.17509e-13	6.14396e-12	0.0851	9.78887e-14	-2.05412e-12
0.2852	-1.90356e-11	1.99514e-11	4.77471e-12	7.72975e-12	0.0852	-1.51905e-12	-6.06452e-13
0.2853	-1.68646e-11	1.62245e-11	2.45443e-12	1.29776e-11	0.0853	-1.3045e-12	1.08569e-12
0.2854	-1.48563e-11	1.43286e-11	-3.52796e-12	1.81035e-11	0.0854	2.53197e-13	1.06912e-12
0.2855	-1.38653e-11	1.25548e-11	-1.15855e-11	1.55389e-11	0.0855	-5.08093e-13	9.30654e-13
0.2856	-1.49495e-11	1.30597e-11	-1.26851e-11	1.0777e-11	0.0856	-1.70436e-13	-9.16702e-13
0.2857	-1.5464e-11	1.16521e-11	-8.29153e-12	1.01655e-11	0.0857	-5.64936e-13	-1.78749e-12
0.2858	-1.63854e-11	1.14653e-11	-1.70068e-12	7.11266e-12	0.0858	1.84837e-12	-2.04801e-12
0.2859	-1.65337e-11	1.25398e-11	-1.09127e-12	6.25704e-12	0.0859	8.1681e-12	-1.57626e-12
0.286	-1.59089e-11	1.3777e-11	-2.8012e-12	6.13385e-12	0.086	4.96647e-12	-2.08126e-12
0.2861	-1.74407e-11	1.67233e-11	1.08697e-11	8.45206e-12	0.0861	1.52079e-12	-1.85407e-12
0.2862	-1.8118e-11	1.59668e-11	1.26998e-11	1.1991e-11	0.0862	6.38671e-13	-5.28546e-13
0.2863	-1.6598e-11	1.55764e-11	1.05016e-11	2.13893e-11	0.0863	-4.87547e-13	-6.6817e-13
0.2864	-1.7967e-11	1.54303e-11	1.19655e-11	3.28627e-11	0.0864	9.5258e-14	-3.00538e-12
0.2865	-1.77898e-11	1.45924e-11	1.03777e-11	2.77347e-11	0.0865	-7.86773e-13	-2.65737e-12
0.2866	-1.58629e-11	1.45682e-11	6.59255e-12	1.89445e-11	0.0866	-2.40127e-12	-2.55381e-12
0.2867	-1.54009e-11	9.78336e-12	1.21878e-13	1.35723e-11	0.0867	-1.81858e-12	-1.22985e-12
0.2868	-1.50609e-11	8.98614e-12	-3.05289e-12	1.51581e-11	0.0868	-1.60218e-12	-6.3859e-13
0.2869	-1.51278e-11	1.34786e-11	-1.34485e-12	1.62556e-11	0.0869	3.23084e-13	-4.76008e-14
0.287	-1.89383e-11	1.67097e-11	6.22256e-12	1.3813e-11	0.087	5.1013e-14	-4.09548e-12
0.2871	-1.83542e-11	2.09988e-11	1.47665e-11	1.17367e-11	0.0871	7.55422e-13	-2.52827e-12
0.2872	-1.7119e-11	2.38637e-11	1.7207e-11	1.16135e-11	0.0872	-1.27187e-13	1.37536e-13
0.2873	-1.65756e-11	2.62809e-11	1.23232e-11	1.31993e-11	0.0873	-3.33084e-14	-1.7132e-12
0.2874	-1.87991e-11	2.81693e-11	8.04984e-12	1.47851e-11	0.0874	1.03708e-12	-1.6107e-12
0.2875	-2.32199e-11	3.05866e-11	3.65437e-12	1.6615e-11	0.0875	-8.22217e-13	-2.85077e-12
0.2876	-2.32461e-11	3.25562e-11	1.7003e-12	1.52711e-11	0.0876	-2.40032e-13	-1.52713e-12
0.2877	-2.05461e-11	3.60722e-11	4.01869e-12	1.30728e-11	0.0877	7.08477e-13	4.09369e-14
0.2878	-2.01655e-11	3.7106e-11	8.41228e-12	8.43296e-12	0.0878	1.77919e-12	7.54851e-13
0.2879	-1.98255e-11	3.7204e-11	1.18293e-11	1.0385e-11	0.0879	1.14108e-12	1.46915e-12
0.288	-1.92821e-11	3.85633e-11	8.04418e-12	1.52666e-11	0.088	-1.07182e-13	-8.67884e-13
0.2881	-1.9878e-11	3.98006e-11	4.86941e-12	1.47772e-11	0.0881	3.53806e-13	-1.6175e-12
0.2882	-1.97414e-11	3.78234e-11	3.8919e-12	1.70955e-11	0.0882	1.18138e-12	2.1501e-12
0.2883	-2.06629e-11	3.69448e-11	6.33236e-12	1.74605e-11	0.0883	3.47426e-12	1.15772e-12
0.2884	-2.04043e-11	3.75717e-11	5.96521e-12	1.48959e-11	0.0884	3.08213e-12	-9.32403e-13
0.2885	-1.82333e-11	3.97855e-11	3.27872e-12	1.12327e-11	0.0885	3.91138e-12	-3.35985e-13
0.2886	-1.7405e-11	4.54987e-11	5.84125e-12	1.58703e-11	0.0886	1.8117e-12	-2.2672e-13
0.2887	-1.89368e-11	5.07236e-11	7.9155e-12	2.02637e-11	0.0887	2.0322e-12	-8.48646e-13
0.2888	-1.97768e-11	4.71595e-11	7.54835e-12	2.20936e-11	0.0888	4.81709e-12	-1.10301e-12
0.2889	-2.22852e-11	4.14794e-11	4.73978e-12	1.92848e-11	0.0889	3.20843e-12	-1.60006e-12
0.289	-2.24335e-11	4.17808e-11	7.66853e-12	1.75747e-11	0.089	2.58021e-13	-9.9695e-13
0.2891	-2.19307e-11	4.48898e-11	8.52208e-12	1.79398e-11	0.0891	-7.38184e-13	3.40145e-13
0.2892	-2.08583e-11	5.00334e-11	6.44594e-12	1.51311e-11	0.0892	1.19643e-12	1.55675e-12
0.2893	-1.88501e-11	5.595e-11	7.42156e-12	1.70831e-11	0.0893	1.5453e-12	1.55428e-12
0.2894	-1.98529e-11	6.06053e-11	6.44405e-12	1.63495e-11	0.0894	1.163e-12	-3.99646e-13
0.2895	-2.24426e-11	6.81902e-11	3.26928e-12	1.3907e-11	0.0895	2.12482e-12	-2.47398e-12
0.2896	-2.1533e-11	8.22042e-11	5.82788e-13	1.31735e-11	0.0896	1.50111e-12	9.206e-14
0.2897	-2.04606e-11	1.0224e-10	-2.1037e-12	1.54917e-11	0.0897	-2.19784e-13	2.41566e-12
0.2898	-1.58482e-11	1.24067e-10	-5.15641e-12	1.36595e-11	0.0898	-2.30187e-13	2.17755e-12
0.2899	-1.76648e-11	1.4455e-10	-4.05871e-12	1.4757e-11	0.0899	1.83616e-12	-1.3398e-13
0.29	-2.50152e-11	1.59175e-10	2.53214e-12	1.20703e-11	0.09	1.46273e-12	-8.5679e-13
0.2901	-2.67098e-11	1.66841e-10	6.43744e-12	8.28504e-12	0.0901	2.18963e-12	-1.08955e-12
0.2902	-2.25042e-11	1.67509e-10	6.19236e-12	1.81419e-12	0.0902	2.43e-12	-1.1985e-12
0.2903	-1.98856e-11	1.69234e-10	2.52931e-12	1.08064e-12	0.0903	1.81765e-12	-9.39546e-13
0.2904	-2.31264e-11	1.70268e-10	-5.23398e-13	7.18303e-12	0.0904	9.62955e-13	-6.85693e-14
0.2905	-2.35595e-11	1.70895e-10	-6.46411e-13	1.40178e-11	0.0905	9.6453e-13	1.29233e-12
0.2906	-2.19582e-11	1.6904e-10	4.4796e-12	1.52374e-11	0.0906	1.45619e-12	2.53276e-12
0.2907	-2.11706e-11	1.67592e-10	8.62904e-12	9.74314e-12	0.0907	1.3393e-12	-9.43343e-15
0.2908	-2.01389e-11	1.66387e-10	6.1867e-12	4.61506e-12	0.0908	3.69714e-13	-4.01501e-12
0.2909	-1.82527e-11	1.64044e-10	8.50509e-12	5.10222e-12	0.0909	-2.3185e-13	-3.01434e-12
0.291	-1.82382e-11	1.62596e-10	5.69652e-12	7.66457e-12	0.091	9.99486e-13	-6.69589e-13
0.2911	-1.89562e-11	1.61961e-10	8.12771e-13	1.07152e-11	0.0911	2.59892e-12	-1.54684e-13
0.2912	-1.92673e-11	1.60879e-10	3.61944e-12	1.15686e-11	0.0912	3.58988e-12	-1.46971e-12
0.2913	-1.94563e-11	1.59919e-10	7.52475e-12	8.39362e-12	0.0913	2.01921e-12	-2.78371e-12
0.2914	-1.78956e-11	1.57169e-10	1.10638e-11	3.38762e-12	0.0914	1.30483e-12	-2.63187e-12
0.2915	-1.65791e-11	1.48641e-10	1.16732e-11	4.11891e-12	0.0915	4.70103e-13	-1.01429e-12
0.2916	-1.72157e-11	1.45972e-10	7.64399e-12	8.02404e-12	0.0916	3.69454e-13	-6.16605e-13
0.2917	-1.74861e-11	1.4786e-10	1.41746e-12	1.52251e-11	0.0917	1.73522e-12	-9.61436e-14
0.2918	-1.93027e-11	1.48568e-10	8.06164e-13	1.5346e-11	0.0918	5.07346e-14	-4.29577e-13
0.2919	-2.07531e-11	1.49114e-10	2.14799e-12	1.00959e-11	0.0919	4.42886e-13	-1.37286e-12
0.292	-2.18372e-11	1.47462e-10	4.58845e-12	9.60646e-12	0.092	2.05716e-12	-3.65848e-12
0.2921	-2.10497e-11	1.44549e-10	5.80821e-12	8.75084e-12	0.0921	2.81834e-12	-3.74651e-12
0.2922	-1.85531e-11	1.41921e-10	-1.76109e-12	8.0173e-12	0.0922	1.62928e-13	-7.82537e-13
0.2923	-1.7318e-11	1.42507e-10	-6.03449e-12	1.2899e-11	0.0923	6.82725e-13	3.03611e-12
0.2924	-1.57166e-11	1.42035e-10	-4.32645e-12	1.1433e-11	0.0924	1.32595e-12	5.14588e-12
0.2925	-1.78994e-11	1.40709e-10	-3.10669e-12	8.136e-12	0.0925	6.27751e-13	1.88459e-12
0.2926	-1.98788e-11	1.39017e-10	-2.74143e-12	3.12999e-12	0.0926	3.59302e-12	3.32232e-13
0.2927	-2.04747e-11	1.35493e-10	-2.25409e-12	1.66402e-12	0.0927	5.58307e-12	1.95361e-12
0.2928	-2.15589e-11	1.35672e-10	6.43005e-14	3.73809e-12	0.0928	4.52268e-12	6.45205e-13
0.2929	-2.0161e-11	1.38537e-10	-1.40149e-12	7.76529e-12	0.0929	-8.08848e-13	5.57394e-13
0.293	-2.4419e-11	1.38635e-10	-4.25867e-13	1.47222e-11	0.093	-2.96523e-12	-5.38989e-12
0.2931	-2.53404e-11	1.33159e-10	1.28217e-12	1.80169e-11	0.0931	-1.45821e-12	-6.94277e-12
0.2932	-2.35763e-11	1.26136e-10	3.04666e-13	1.44758e-11	0.0932	5.00875e-14	-6.90886e-12
0.2933	-2.07135e-11	1.22897e-10	-2.01561e-12	1.02022e-11	0.0933	2.16863e-13	-3.21298e-12
0.2934	-1.82984e-11	1.21937e-10	-7.38765e-12	7.39346e-12	0.0934	5.06958e-13	4.82759e-13
0.2935	-1.89756e-11	1.2171e-10	-9.46379e-12	8.97925e-12	0.0935	3.48382e-12	-1.31481e-12
0.2936	-2.01819e-11	1.2079e-10	5.45032e-13	9.34434e-12	0.0936	4.63083e-12	-2.38016e-12
0.2937	-1.87026e-11	1.20807e-10	7.38003e-12	7.14595e-12	0.0937	1.62861e-12	-2.46913e-12
0.2938	-1.86475e-11	1.19521e-10	1.54357e-11	9.46416e-12	0.0938	1.8013e-12	-7.27268e-13
0.2939	-1.88365e-11	1.17178e-10	1.77541e-11	1.59328e-11	0.0939	2.46329e-12	-8.42278e-14
0.294	-1.78048e-11	1.13085e-10	8.96411e-12	2.0082e-11	0.094	2.27176e-12	9.24786e-13
0.2941	-1.94179e-11	1.11962e-10	5.05691e-12	2.31327e-11	0.0941	2.69147e-12	-3.85773e-13
0.2942	-2.17635e-11	1.11938e-10	6.1546e-12	1.95915e-11	0.0942	-2.7474e-12	-1.20829e-12
0.2943	-2.49636e-11	1.10368e-10	9.57163e-12	1.77593e-11	0.0943	-2.44824e-12	-9.32443e-13
0.2944	-2.55595e-11	1.0599e-10	-2.026e-12	1.44623e-11	0.0944	1.70888e-13	-2.90654e-13
0.2945	-2.31443e-11	1.02303e-10	-7.15389e-12	9.21215e-12	0.0945	1.69193e-12	-1.37446e-13
0.2946	-2.13395e-11	1.03052e-10	4.13521e-13	8.72275e-12	0.0946	1.87061e-12	-5.94924e-13
0.2947	-2.09588e-11	1.02337e-10	3.46434e-12	-5.55718e-13	0.0947	9.64697e-14	-5.64484e-13
0.2948	-2.17582e-11	1.00034e-10	5.29445e-12	2.25077e-12	0.0948	-2.1658e-12	-4.12357e-13
0.2949	-2.43072e-11	9.8138e-11	6.75835e-12	6.64418e-12	0.0949	-1.74245e-12	-2.3358e-12
0.295	-2.49438e-11	1.0084e-10	6.02498e-12	5.30028e-12	0.095	-2.41782e-12	-1.20791e-12
0.2951	-2.43597e-11	1.02484e-10	7.12267e-12	4.93295e-12	0.0951	-1.7506e-12	-5.68773e-13
0.2952	-2.45487e-11	9.90829e-11	6.14516e-12	9.69257e-12	0.0952	2.21223e-12	-2.98191e-12
0.2953	-2.32322e-11	9.75939e-11	4.43524e-12	1.21328e-11	0.0953	2.02424e-12	-4.41904e-12
0.2954	-2.32991e-11	9.50064e-11	7.11984e-12	1.16434e-11	0.0954	1.83569e-12	-3.29333e-12
0.2955	-2.46274e-11	9.1605e-11	1.17576e-11	1.04216e-11	0.0955	9.14006e-13	-2.04625e-12
0.2956	-2.4613e-11	8.82035e-11	8.82693e-12	7.97909e-12	0.0956	1.45632e-12	1.76635e-13
0.2957	-2.38661e-11	8.60229e-11	4.06525e-12	7.61175e-12	0.0957	1.50935e-12	-1.14134e-12
0.2958	-1.76668e-11	8.4005e-11	5.65122e-12	5.77958e-12	0.0958	9.64073e-14	-2.58224e-12
0.2959	-1.52923e-11	8.49981e-11	6.26063e-12	6.63295e-12	0.0959	-1.43991e-12	-1.58267e-12
0.296	-2.15848e-11	8.48519e-11	9.43351e-12	9.56151e-12	0.096	-1.63488e-12	-1.43858e-12
0.2961	-2.56394e-11	8.21422e-11	9.92085e-12	8.82796e-12	0.0961	1.83066e-12	-2.15003e-12
0.2962	-2.71711e-11	8.21588e-11	7.11229e-12	8.33856e-12	0.0962	2.24273e-12	-3.22875e-12
0.2963	-2.53663e-11	8.1443e-11	7.47755e-12	8.58157e-12	0.0963	1.31014e-12	-2.59958e-12
0.2964	-2.07539e-11	7.92216e-11	1.11387e-11	7.72596e-12	0.0964	2.08453e-12	-2.33775e-12
0.2965	-2.08615e-11	7.93195e-11	1.19923e-11	8.33519e-12	0.0965	3.34502e-12	-2.46084e-13
0.2966	-2.21085e-11	7.74237e-11	8.20714e-12	1.05313e-11	0.0966	1.18522e-12	1.60014e-12
0.2967	-2.21347e-11	7.46326e-11	8.93862e-12	1.08964e-11	0.0967	-1.83155e-12	1.49187e-12
0.2968	-2.30561e-11	7.5463e-11	1.35763e-11	6.13455e-12	0.0968	-1.18881e-12	4.05601e-13
0.2969	-2.2472e-11	7.69037e-11	9.66916e-12	-8.24583e-13	0.0969	-2.37988e-12	-1.90283e-12
0.297	-2.083e-11	7.97279e-11	1.13772e-11	4.66746e-12	0.097	-3.32964e-12	-3.11414e-12
0.2971	-2.07341e-11	7.73438e-11	1.101e-11	6.00911e-12	0.0971	-2.69541e-12	-1.64148e-12
0.2972	-2.21031e-11	7.54886e-11	1.05208e-11	5.27556e-12	0.0972	-2.18625e-12	-1.51327e-12
0.2973	-2.20887e-11	7.37962e-11	1.18626e-11	1.04014e-11	0.0973	-2.29051e-12	-5.32301e-13
0.2974	-2.12198e-11	7.34466e-11	1.44252e-11	1.00341e-11	0.0974	-2.39789e-12	5.68955e-13
0.2975	-2.19377e-11	7.41142e-11	1.52787e-11	1.0155e-11	0.0975	-1.65395e-12	-3.09231e-12
0.2976	-2.42833e-11	7.47411e-11	1.10053e-11	9.6656e-12	0.0976	-7.91138e-13	-5.65675e-12
0.2977	-2.60185e-11	7.52867e-11	5.63328e-12	9.17619e-12	0.0977	5.56658e-13	-5.29336e-12
0.2978	-2.76317e-11	7.20887e-11	7.58547e-12	9.41921e-12	0.0978	-9.06474e-13	-3.71119e-12
0.2979	-2.74138e-11	6.86466e-11	9.41558e-12	9.54015e-12	0.0979	-2.25083e-12	-4.45033e-12
0.298	-2.73994e-11	6.81343e-11	6.72909e-12	9.05075e-12	0.098	6.73981e-13	-1.89559e-12
0.2981	-2.72221e-11	6.97784e-11	7.46056e-12	6.60822e-12	0.0981	4.21652e-13	-1.29603e-12
0.2982	-2.41559e-11	7.09343e-11	1.05114e-11	8.56022e-12	0.0982	-1.90919e-12	-2.65173e-12
0.2983	-1.90959e-11	6.78991e-11	1.27077e-11	9.7798e-12	0.0983	-1.31362e-12	-1.56821e-12
0.2984	-1.83083e-11	6.68578e-11	1.3195e-11	1.00228e-11	0.0984	1.11256e-14	-6.0897e-13
0.2985	-2.17119e-11	6.5735e-11	1.22175e-11	1.02658e-11	0.0985	7.22374e-13	-1.11674e-12
0.2986	-2.45864e-11	6.79489e-11	1.28269e-11	1.00206e-11	0.0986	1.06436e-12	-2.48112e-12
0.2987	-2.52637e-11	6.75585e-11	1.14832e-11	7.45597e-12	0.0987	1.03724e-12	-2.87101e-12
0.2988	-2.34182e-11	6.68427e-11	6.47739e-12	7.33278e-12	0.0988	-1.55613e-12	-2.89672e-12
0.2989	-2.37699e-11	6.95042e-11	4.52332e-12	9.52892e-12	0.0989	-1.22244e-12	-2.31401e-12
0.299	-2.56679e-11	7.00904e-11	3.30168e-12	5.74361e-12	0.099	-1.98986e-12	-8.78681e-13
0.2991	-2.61418e-11	6.62007e-11	8.7939e-12	3.71398e-13	0.0991	-1.90509e-12	-1.77546e-13
0.2992	-2.66156e-11	6.47931e-11	1.5873e-11	-3.53598e-12	0.0992	-1.82245e-12	-5.76698e-13
0.2993	-2.68453e-11	6.31821e-11	1.29424e-11	-5.49023e-12	0.0993	-1.61972e-12	-8.55335e-13
0.2994	-2.65867e-11	6.37276e-11	1.02559e-11	1.22252e-12	0.0994	9.00546e-13	-4.02973e-13
0.2995	-2.6084e-11	6.42732e-11	8.79012e-12	9.52217e-12	0.0995	2.32053e-12	-1.90506e-12
0.2996	-2.48895e-11	6.41677e-11	7.08019e-12	9.39898e-12	0.0996	2.15216e-12	-3.28627e-12
0.2997	-2.27185e-11	6.34112e-11	8.05581e-12	7.44473e-12	0.0997	-3.36774e-13	-2.83753e-12
0.2998	-2.43723e-11	6.46078e-11	1.07404e-11	1.7063e-12	0.0998	-2.9488e-12	-8.02875e-13
0.2999	-2.73283e-11	6.77981e-11	1.31809e-11	2.4376e-12	0.0999	-1.53337e-12	-7.22229e-13
0.3	-2.76393e-11	6.31354e-11	1.36682e-11	7.6855e-12	0.1	3.69676e-13	-3.32791e-12
0.3001	-2.616e-11	5.9856e-11	1.39114e-11	1.24451e-11	0.1001	1.97052e-13	-1.1735e-12
0.3002	-2.70001e-11	6.03202e-11	1.87933e-11	1.5984e-11	0.1002	-9.79286e-14	-1.18285e-13
0.3003	-2.79215e-11	6.27375e-11	2.33089e-11	1.57388e-11	0.1003	1.31602e-12	-1.62119e-13
0.3004	-2.65643e-11	6.23065e-11	1.84252e-11	1.26859e-11	0.1004	1.63146e-12	-8.41896e-14
0.3005	-2.66312e-11	5.83354e-11	1.54945e-11	1.09758e-11	0.1005	4.82414e-13	-3.7267e-13
0.3006	-2.28326e-11	5.51375e-11	1.24418e-11	9.63188e-12	0.1006	-5.44006e-13	-9.05349e-13
0.3007	-2.3754e-11	5.46657e-11	4.14012e-12	1.03632e-11	0.1007	7.49633e-13	-3.63523e-12
0.3008	-2.62217e-11	5.58624e-11	-1.35398e-12	1.32917e-11	0.1008	1.80002e-12	-4.16764e-12
0.3009	-2.85265e-11	5.1932e-11	5.98197e-13	1.31686e-11	0.1009	4.10043e-13	-3.35693e-12
0.301	-2.7088e-11	5.17858e-11	5.96834e-12	1.40219e-11	0.101	-2.1658e-15	-3.76645e-12
0.3011	-2.56087e-11	5.21686e-11	7.79846e-12	1.12132e-11	0.1011	2.88288e-12	-4.05334e-12
0.3012	-2.29494e-11	5.33245e-11	9.5065e-12	9.50307e-12	0.1012	4.5487e-12	-3.97332e-12
0.3013	-1.86624e-11	5.27307e-11	6.57587e-12	9.99023e-12	0.1013	2.06577e-12	6.24066e-13
0.3014	-1.84039e-11	5.07942e-11	7.30735e-12	1.09657e-11	0.1014	1.29354e-12	6.44299e-12
0.3015	-2.19294e-11	5.55308e-11	1.19451e-11	1.08425e-11	0.1015	1.49975e-12	2.98547e-12
0.3016	-2.33391e-11	5.47336e-11	1.67049e-11	1.07193e-11	0.1016	2.31826e-12	6.27556e-13
0.3017	-2.40978e-11	4.91756e-11	1.78026e-11	1.15726e-11	0.1017	2.4064e-12	-2.33964e-12
0.3018	-2.33102e-11	4.76866e-11	1.79237e-11	1.57219e-11	0.1018	5.51963e-14	-2.00979e-12
0.3019	-2.19937e-11	4.81915e-11	1.25516e-11	1.81622e-11	0.1019	-3.39256e-12	-4.58018e-13
0.302	-2.18572e-11	4.67025e-11	1.03534e-11	1.66962e-11	0.102	6.08043e-13	2.07155e-12
0.3021	-2.42028e-11	4.72888e-11	8.03316e-12	1.86482e-11	0.1021	2.29136e-12	2.52718e-12
0.3022	-2.60601e-11	4.42129e-11	4.85839e-12	1.57174e-11	0.1022	-6.6199e-13	9.08918e-13
0.3023	-2.47435e-11	4.28053e-11	8.64162e-12	9.61278e-12	0.1023	-8.05753e-13	-3.41817e-13
0.3024	-2.44442e-11	4.22522e-11	1.13262e-11	3.63021e-12	0.1024	6.39317e-13	-1.5912e-12
0.3025	-2.37381e-11	4.23095e-11	7.78524e-12	6.07049e-12	0.1025	6.96904e-12	-2.75719e-13
0.3026	-2.39677e-11	4.26923e-11	4.12219e-12	8.3887e-12	0.1026	7.19703e-12	1.65153e-12
0.3027	-2.30988e-11	4.47027e-11	1.16896e-11	9.85243e-12	0.1027	8.34929e-13	1.26086e-12
0.3028	-2.68279e-11	4.78931e-11	2.63371e-11	1.15603e-11	0.1028	-1.25305e-12	-1.04976e-13
0.3029	-2.52672e-11	4.42476e-11	2.56037e-11	9.85018e-12	0.1029	-5.31825e-13	-2.56804e-12
0.303	-2.30962e-11	4.25552e-11	1.9011e-11	1.90043e-11	0.103	1.89988e-12	-1.73382e-12
0.3031	-2.40583e-11	4.41993e-11	1.33948e-11	2.57171e-11	0.1031	2.13572e-12	-4.0994e-13
0.3032	-2.49797e-11	4.45007e-11	1.22952e-11	2.4007e-11	0.1032	1.15216e-12	-1.40401e-12
0.3033	-2.40701e-11	4.05297e-11	1.33929e-11	2.02217e-11	0.1033	5.36012e-13	-2.03054e-12
0.3034	-2.26722e-11	3.31e-11	1.31478e-11	1.9244e-11	0.1034	-7.90236e-14	-1.92333e-12
0.3035	-1.98501e-11	3.17331e-11	1.42455e-11	1.7778e-11	0.1035	-6.93091e-13	-1.69275e-12
0.3036	-2.07715e-11	3.15869e-11	1.22915e-11	1.58238e-11	0.1036	-2.07636e-13	-1.21672e-12
0.3037	-2.49888e-11	3.33124e-11	8.2622e-12	1.57006e-11	0.1037	-2.09678e-13	-2.32627e-12
0.3038	-2.42826e-11	3.55263e-11	5.20949e-12	1.96057e-11	0.1038	-5.77229e-13	-5.04868e-13
0.3039	-2.53262e-11	3.64787e-11	2.64507e-12	2.25342e-11	0.1039	3.23856e-14	2.19196e-13
0.304	-2.67358e-11	3.55594e-11	3.13241e-12	1.97255e-11	0.104	7.6457e-13	-8.86547e-13
0.3041	-3.07904e-11	3.26463e-11	5.20666e-12	1.47195e-11	0.1041	3.98524e-13	-3.0897e-12
0.3042	-3.39498e-11	3.25815e-11	7.7692e-12	1.37418e-11	0.1042	-3.33442e-13	-1.99576e-12
0.3043	-3.11277e-11	3.39002e-11	8.13446e-12	1.47173e-11	0.1043	1.25414e-12	-7.78617e-13
0.3044	-2.71256e-11	3.55037e-11	3.86106e-12	1.60589e-11	0.1044	2.47565e-12	-6.58977e-13
0.3045	-2.62974e-11	3.47471e-11	1.41871e-12	1.6424e-11	0.1045	5.23392e-13	2.26934e-12
0.3046	-2.52657e-11	3.25258e-11	4.9578e-12	1.76436e-11	0.1046	6.46377e-13	2.75725e-12
0.3047	-2.43154e-11	3.04264e-11	5.56721e-12	1.6788e-11	0.1047	2.11213e-12	1.94319e-13
0.3048	-2.37312e-11	2.71878e-11	6.05455e-12	1.31247e-11	0.1048	2.35711e-12	-7.80842e-13
0.3049	-2.18044e-11	2.68789e-11	7.51845e-12	1.25132e-11	0.1049	1.25919e-12	-1.68259e-13
0.305	-2.13423e-11	2.92961e-11	9.5927e-12	1.81274e-11	0.105	5.2731e-13	5.67219e-13
0.3051	-2.05141e-11	2.91907e-11	5.07516e-12	2.1178e-11	0.1051	4.05635e-13	-1.01586e-12
0.3052	-2.18424e-11	2.75389e-11	6.7832e-12	2.22755e-11	0.1052	1.01621e-12	-2.96443e-12
0.3053	-2.62225e-11	2.58872e-11	2.75393e-12	1.48281e-11	0.1053	1.50455e-12	-2.10465e-12
0.3054	-2.57198e-11	2.46017e-11	2.2647e-12	1.03104e-11	0.1054	3.95968e-14	3.4271e-13
0.3055	-2.41184e-11	2.49031e-11	2.99619e-12	1.507e-11	0.1055	1.01588e-12	-1.38949e-13
0.3056	-2.28832e-11	2.70763e-11	1.04212e-12	2.08062e-11	0.1056	1.50376e-12	-2.20688e-12
0.3057	-2.28281e-11	2.87205e-11	1.28531e-12	2.2514e-11	0.1057	2.35771e-12	-1.10038e-12
0.3058	-2.35461e-11	2.60515e-11	5.43476e-12	1.88508e-11	0.1058	-1.06094e-12	-1.45814e-12
0.3059	-2.37758e-11	2.32604e-11	1.06828e-11	1.54317e-11	0.1059	-3.62519e-12	1.57114e-14
0.306	-2.36799e-11	2.16494e-11	1.17805e-11	1.40878e-11	0.106	-9.40486e-13	2.69357e-13
0.3061	-2.35841e-11	2.3375e-11	1.17796e-11	1.12791e-11	0.1061	1.62216e-12	-2.08921e-13
0.3062	-2.44242e-11	2.43681e-11	1.37318e-11	9.32481e-12	0.1062	-8.75801e-14	2.36505e-12
0.3063	-2.36773e-11	2.39371e-11	1.51957e-11	1.40844e-11	0.1063	-1.43091e-12	3.10845e-12
0.3064	-2.32559e-11	2.55812e-11	1.58051e-11	1.68909e-11	0.1064	-8.20839e-13	3.12357e-13
0.3065	-2.10035e-11	2.45806e-11	1.84897e-11	1.34718e-11	0.1065	3.37542e-14	-1.87278e-12
0.3066	-2.0867e-11	2.1993e-11	1.86108e-11	1.48135e-11	0.1066	7.66729e-13	-1.3717e-12
0.3067	-2.3416e-11	2.09516e-11	1.81216e-11	1.9329e-11	0.1067	1.9885e-12	1.06658e-13
0.3068	-2.56802e-11	2.14972e-11	1.50689e-11	1.94499e-11	0.1068	2.72251e-12	-1.18829e-15
0.3069	-2.46892e-11	1.99675e-11	1.10396e-11	2.23785e-11	0.1069	1.13775e-12	-8.40729e-13
0.307	-2.28437e-11	2.07979e-11	1.54332e-11	2.12787e-11	0.107	1.50667e-12	-2.41197e-12
0.3071	-2.2341e-11	2.25642e-11	1.94606e-11	1.96907e-11	0.1071	2.73067e-12	-1.78519e-12
0.3072	-1.98444e-11	2.11566e-11	1.84831e-11	1.71261e-11	0.1072	2.12424e-12	-2.74455e-12
0.3073	-1.6941e-11	1.77959e-11	1.90925e-11	1.74912e-11	0.1073	2.49503e-12	-2.6045e-12
0.3074	-1.65197e-11	1.75683e-11	2.00681e-11	1.79783e-11	0.1074	2.74444e-12	-3.074e-12
0.3075	-1.71969e-11	2.09215e-11	1.51843e-11	2.286e-11	0.1075	1.65179e-12	-2.68825e-12
0.3076	-1.73046e-11	2.30133e-11	1.34744e-11	2.70093e-11	0.1076	-6.60815e-13	-2.17972e-12
0.3077	-2.00977e-11	1.99374e-11	1.62811e-11	2.42005e-11	0.1077	2.01251e-13	-1.54841e-12
0.3078	-2.20364e-11	1.69836e-11	1.51815e-11	2.18801e-11	0.1078	1.06419e-12	-4.28138e-13
0.3079	-2.16557e-11	1.58201e-11	1.46923e-11	2.23672e-11	0.1079	1.80595e-12	5.70752e-13
0.308	-2.17227e-11	1.84816e-11	1.65224e-11	2.09013e-11	0.108	1.32788e-12	4.71659e-13
0.3081	-2.24407e-11	1.71961e-11	1.82304e-11	2.04119e-11	0.1081	9.7278e-13	1.83801e-12
0.3082	-2.38503e-11	1.1516e-11	2.14033e-11	2.06549e-11	0.1082	7.40677e-13	2.22838e-12
0.3083	-2.48938e-11	1.18581e-11	2.10362e-11	1.67475e-11	0.1083	1.60817e-12	5.58243e-14
0.3084	-2.52049e-11	1.28512e-11	1.78614e-11	1.27181e-11	0.1084	1.74424e-12	-3.09276e-12
0.3085	-2.54753e-11	1.22168e-11	1.41983e-11	1.05197e-11	0.1085	5.02307e-14	-4.16563e-12
0.3086	-2.46063e-11	1.22334e-11	1.54181e-11	1.18613e-11	0.1086	-1.77893e-13	-2.67453e-12
0.3087	-2.72774e-11	9.44232e-12	2.00558e-11	1.3325e-11	0.1087	-5.27014e-13	-2.52575e-12
0.3088	-2.87685e-11	8.92993e-12	1.6759e-11	1.22253e-11	0.1088	-2.64694e-13	-9.11726e-13
0.3089	-2.9161e-11	1.01672e-11	1.60256e-11	1.0271e-11	0.1089	8.53264e-13	1.31305e-12
0.309	-2.63389e-11	1.08348e-11	1.95647e-11	6.85194e-12	0.109	7.5169e-13	1.58506e-12
0.3091	-2.35576e-11	9.38654e-12	2.01741e-11	6.24046e-12	0.1091	7.73378e-13	8.80828e-13
0.3092	-2.40721e-11	1.18445e-11	1.76097e-11	1.23429e-11	0.1092	1.6508e-12	-6.7763e-13
0.3093	-2.36507e-11	1.38142e-11	1.48011e-11	1.68583e-11	0.1093	3.32219e-13	8.34541e-14
0.3094	-2.35142e-11	1.38715e-11	1.60209e-11	1.71013e-11	0.1094	-1.10713e-12	1.57708e-12
0.3095	-2.65515e-11	1.36846e-11	1.68744e-11	1.55133e-11	0.1095	1.11698e-12	2.33839e-12
0.3096	-3.22337e-11	1.50033e-11	1.6019e-11	1.02632e-11	0.1096	4.0749e-12	1.14665e-12
0.3097	-3.82414e-11	1.34329e-11	1.30884e-11	1.24593e-11	0.1097	2.51764e-12	-5.41614e-12
0.3098	-3.51752e-11	7.06119e-12	1.54068e-11	1.62424e-11	0.1098	-5.03058e-13	-4.28846e-12
0.3099	-3.16207e-11	5.61289e-12	1.66265e-11	1.37998e-11	0.1099	-2.30164e-12	-2.18421e-12
0.31	-3.19724e-11	1.11227e-11	1.25973e-11	9.03796e-12	0.11	-6.80875e-13	-2.02075e-13
0.3101	-3.24869e-11	1.84634e-11	1.3695e-11	5.74094e-12	0.1101	9.41251e-13	-5.39358e-13
0.3102	-3.15773e-11	2.90187e-11	1.32057e-11	3.78669e-12	0.1102	2.68678e-12	-2.09746e-12
0.3103	-2.94877e-11	4.36431e-11	1.45476e-11	4.64006e-12	0.1103	2.48048e-12	-8.48152e-13
0.3104	-2.7398e-11	5.79825e-11	1.78425e-11	7.6907e-12	0.1104	5.66451e-13	-5.75674e-13
0.3105	-2.71395e-11	7.43159e-11	1.97947e-11	1.09855e-11	0.1105	1.58333e-12	-1.52423e-12
0.3106	-2.94443e-11	9.11374e-11	1.39344e-11	1.11064e-11	0.1106	2.47928e-12	-1.25248e-12
0.3107	-3.14237e-11	1.08122e-10	1.44217e-11	1.31805e-11	0.1107	3.86458e-12	-1.83567e-12
0.3108	-3.39727e-11	1.22746e-10	1.90594e-11	1.47663e-11	0.1108	1.82406e-15	-1.4428e-12
0.3109	-3.14355e-11	1.31145e-10	1.91806e-11	1.0981e-11	0.1109	-3.61591e-12	-8.06354e-13
0.311	-2.98341e-11	1.3698e-10	1.23437e-11	8.66052e-12	0.111	-2.22803e-12	-1.87952e-12
0.3111	-3.04707e-11	1.41473e-10	-4.13675e-12	1.23215e-11	0.1111	-2.67058e-12	-2.46505e-12
0.3112	-3.17177e-11	1.4564e-10	6.23047e-13	1.07335e-11	0.1112	-2.50227e-12	-4.27196e-12
0.3113	-3.26391e-11	1.46714e-10	1.17305e-11	-3.30574e-12	0.1113	-1.47908e-12	-3.51611e-12
0.3114	-3.29502e-11	1.46771e-10	1.4171e-11	-1.69787e-11	0.1114	-9.43877e-13	-2.15064e-12
0.3115	-3.26509e-11	1.44469e-10	1.16065e-11	-1.33178e-11	0.1115	4.45971e-13	-2.49487e-12
0.3116	-3.27178e-11	1.45421e-10	8.18763e-12	-4.16361e-12	0.1116	6.23035e-12	-1.13092e-12
0.3117	-3.19303e-11	1.51134e-10	4.15836e-12	5.35675e-12	0.1117	7.1318e-12	-2.56036e-13
0.3118	-3.47641e-11	1.51191e-10	3.425e-12	3.4025e-12	0.1118	2.41777e-12	-1.09097e-12
0.3119	-3.98766e-11	1.48278e-10	1.09924e-11	2.42482e-12	0.1119	1.24341e-12	-1.8047e-12
0.312	-3.65256e-11	1.43249e-10	1.81936e-11	-1.23842e-12	0.112	9.23059e-13	-9.32445e-13
0.3121	-3.45173e-11	1.40702e-10	1.97796e-11	-8.7333e-13	0.1121	8.46224e-13	-2.01431e-12
0.3122	-3.16545e-11	1.41167e-10	1.57503e-11	-3.86171e-13	0.1122	1.62313e-12	-1.38825e-12
0.3123	-3.23725e-11	1.3984e-10	1.09886e-11	-1.43153e-13	0.1123	8.12235e-13	2.13256e-13
0.3124	-3.0527e-11	1.38596e-10	8.9125e-12	-2.2208e-14	0.1124	1.34312e-12	1.3253e-12
0.3125	-2.17235e-11	1.36334e-10	1.26957e-11	-4.05165e-12	0.1125	-1.17886e-12	7.27167e-13
0.3126	-2.28484e-11	1.35048e-10	1.46479e-11	-4.17485e-12	0.1126	-1.38273e-12	-2.06946e-12
0.3127	-2.5316e-11	1.3006e-10	9.88623e-12	-2.22285e-12	0.1127	3.65163e-13	-4.1349e-12
0.3128	-2.50574e-11	1.26455e-10	5.61283e-12	1.43814e-12	0.1128	7.68795e-13	-1.80702e-12
0.3129	-2.70775e-11	1.27e-10	6.71051e-12	7.05225e-12	0.1129	-1.51474e-12	-2.41007e-12
0.313	-2.82024e-11	1.26366e-10	7.8082e-12	3.8773e-12	0.113	-1.72483e-12	-1.06118e-12
0.3131	-2.79845e-11	1.24999e-10	7.31898e-12	-1.61699e-12	0.1131	-1.93678e-12	-1.91078e-12
0.3132	-2.91093e-11	1.24283e-10	7.68425e-12	-3.08295e-12	0.1132	-1.17413e-12	-3.24989e-12
0.3133	-2.76707e-11	1.23242e-10	5.2419e-12	9.4424e-13	0.1133	-1.26808e-12	-5.20062e-12
0.3134	-2.54997e-11	1.21305e-10	3.4099e-12	4.97144e-12	0.1134	-2.34082e-12	-3.24636e-12
0.3135	-2.3939e-11	1.21281e-10	-1.47386e-12	9.24277e-12	0.1135	-2.92759e-12	9.03872e-13
0.3136	-2.41687e-11	1.23658e-10	-4.40449e-12	9.24165e-12	0.1136	-3.76091e-12	7.80283e-13
0.3137	-2.52529e-11	1.22291e-10	3.55308e-13	8.01982e-12	0.1137	-1.66702e-12	-1.78611e-12
0.3138	-2.64999e-11	1.18564e-10	-1.23255e-12	-1.62486e-12	0.1138	-1.04046e-12	-2.5229e-12
0.3139	-2.64854e-11	1.17319e-10	-1.23349e-12	-2.72461e-12	0.1139	-5.38487e-13	-5.75593e-13
0.314	-2.52909e-11	1.16074e-10	1.0849e-12	-6.50541e-13	0.114	-1.3818e-12	-2.16637e-13
0.3141	-2.38524e-11	1.13894e-10	-2.58819e-13	1.78974e-12	0.1141	-6.40692e-13	1.36158e-12
0.3142	-2.59945e-11	1.13625e-10	-1.56217e-14	3.4976e-12	0.1142	-1.61101e-12	8.6318e-13
0.3143	-2.78518e-11	1.14578e-10	4.37796e-12	3.13027e-12	0.1143	-1.36304e-12	-9.7941e-13
0.3144	-2.92208e-11	1.12885e-10	1.1335e-11	1.99458e-13	0.1144	-2.70437e-12	-2.091e-12
0.3145	-2.88401e-11	1.08955e-10	1.2921e-11	-2.9755e-12	0.1145	-2.94942e-12	-4.30266e-12
0.3146	-2.89884e-11	1.07019e-10	1.35304e-11	-2.61041e-12	0.1146	9.53622e-13	-4.5626e-12
0.3147	-2.70209e-11	1.07361e-10	8.89079e-12	-2.00118e-12	0.1147	2.04686e-12	-2.38254e-12
0.3148	-2.98547e-11	1.08517e-10	4.73946e-12	9.27384e-13	0.1148	2.8939e-12	-3.13356e-12
0.3149	-3.06134e-11	1.06743e-10	4.49437e-12	5.60049e-13	0.1149	4.43047e-13	-3.51979e-12
0.315	-2.81575e-11	1.04399e-10	3.02858e-12	-1.15006e-12	0.115	-1.15521e-12	-2.07639e-12
0.3151	-2.45624e-11	1.02341e-10	1.56279e-12	-5.78986e-12	0.1151	-2.14493e-12	3.42194e-13
0.3152	-2.39783e-11	1.01055e-10	3.51498e-12	-9.45309e-12	0.1152	-8.17037e-13	-4.14404e-13
0.3153	-2.67714e-11	1.00258e-10	5.46716e-12	-9.088e-12	0.1153	-2.23159e-13	-1.29438e-12
0.3154	-2.90356e-11	9.88911e-11	2.6586e-12	-7.01393e-12	0.1154	-1.1906e-13	1.43701e-13
0.3155	-3.02826e-11	9.77276e-11	3.75629e-12	-7.25919e-12	0.1155	2.27795e-13	-2.50509e-13
0.3156	-2.96171e-11	9.77035e-11	3.63327e-12	-9.70172e-12	0.1156	2.40446e-12	-2.72111e-12
0.3157	-2.95619e-11	9.21456e-11	-5.18063e-13	-1.60505e-11	0.1157	7.95831e-13	-2.26318e-12
0.3158	-3.04426e-11	8.84186e-11	2.04447e-12	-1.69061e-11	0.1158	1.74973e-12	-4.63549e-13
0.3159	-3.02248e-11	8.7418e-11	1.18903e-12	-1.22686e-11	0.1159	6.27596e-13	-1.10636e-12
0.316	-2.9722e-11	8.70683e-11	-2.22988e-12	-1.14152e-11	0.116	-1.10561e-12	-3.33703e-12
0.3161	-2.79579e-11	8.7207e-11	5.09339e-12	-1.06839e-11	0.1161	9.0242e-14	-3.2492e-12
0.3162	-2.55427e-11	8.61656e-11	1.00973e-11	-1.38589e-11	0.1162	-1.39999e-12	-2.91799e-12
0.3163	-2.50807e-11	8.5816e-11	1.43689e-11	-1.50807e-11	0.1163	-5.71322e-13	-1.9771e-12
0.3164	-2.76704e-11	8.49781e-11	1.22927e-11	-8.00173e-12	0.1164	1.23357e-12	-2.86786e-12
0.3165	-3.14402e-11	8.86974e-11	6.06618e-12	-3.36418e-12	0.1165	3.40443e-12	-4.24736e-12
0.3166	-3.18733e-11	9.15216e-11	6.18731e-12	-1.29011e-12	0.1166	-2.84242e-13	-3.42996e-12
0.3167	-3.18588e-11	8.85271e-11	1.18016e-11	-5.58814e-13	0.1167	-1.89778e-12	-1.71361e-13
0.3168	-3.22106e-11	8.49223e-11	2.01014e-11	-2.7572e-12	0.1168	2.72894e-13	1.98851e-12
0.3169	-3.16672e-11	8.03002e-11	2.05888e-11	-5.81009e-12	0.1169	2.46425e-13	1.34082e-12
0.317	-3.05948e-11	8.06423e-11	1.48505e-11	-9.35125e-12	0.117	-1.4611e-13	1.79194e-12
0.3171	-2.93189e-11	8.32224e-11	4.35153e-12	-1.06951e-11	0.1171	3.16048e-13	1.63302e-12
0.3172	-3.28852e-11	8.42155e-11	-1.50878e-12	-1.11845e-11	0.1172	-1.29678e-12	-1.08897e-12
0.3173	-3.39287e-11	8.28893e-11	2.39652e-12	-8.74426e-12	0.1173	-2.29903e-12	-1.73525e-12
0.3174	-3.33853e-11	8.079e-11	5.81355e-12	-5.8157e-12	0.1174	-1.95829e-12	-3.35749e-12
0.3175	-3.24757e-11	7.76734e-11	3.73741e-12	-8.99065e-12	0.1175	2.13734e-13	-2.90383e-12
0.3176	-3.18509e-11	7.4923e-11	7.03236e-12	-1.1189e-11	0.1176	7.99019e-13	-1.83902e-12
0.3177	-3.07378e-11	7.52245e-11	9.71696e-12	-1.16784e-11	0.1177	1.62856e-12	-2.48236e-12
0.3178	-3.19033e-11	7.47121e-11	8.00704e-12	-8.38367e-12	0.1178	6.27133e-13	-2.39239e-12
0.3179	-3.40455e-11	7.3101e-11	8.25023e-12	-7.53031e-12	0.1179	1.94507e-12	-2.26297e-13
0.318	-3.00027e-11	7.12052e-11	1.14231e-11	-7.89764e-12	0.118	1.79811e-12	4.38217e-12
0.3181	-2.93372e-11	7.26459e-11	1.43519e-11	-8.14291e-12	0.1181	1.77312e-12	4.47506e-12
0.3182	-3.22525e-11	7.59177e-11	1.04447e-11	-7.41161e-12	0.1182	5.16594e-12	-8.02098e-13
0.3183	-3.29297e-11	7.52832e-11	7.63611e-12	-3.62855e-12	0.1183	3.18742e-12	-1.9278e-12
0.3184	-3.17353e-11	7.54219e-11	8.48966e-12	-8.96353e-14	0.1184	-1.21127e-14	9.75861e-13
0.3185	-3.22498e-11	7.0637e-11	1.17846e-11	1.61822e-12	0.1185	-1.13681e-12	1.19502e-12
0.3186	-3.19912e-11	6.65846e-11	1.26382e-11	4.913e-12	0.1186	-2.62814e-12	1.04903e-12
0.3187	-3.15292e-11	6.73336e-11	1.0562e-11	4.05738e-12	0.1187	-3.38749e-12	-9.26926e-13
0.3188	-3.10671e-11	6.97508e-11	3.481e-12	-8.26552e-13	0.1188	-3.65902e-12	-1.68105e-12
0.3189	-2.86926e-11	6.86281e-11	-1.15862e-12	-9.52543e-14	0.1189	-1.12342e-12	-1.21338e-12
0.319	-2.92885e-11	6.8075e-11	3.35704e-12	3.91901e-13	0.119	-6.63502e-13	-9.8875e-13
0.3191	-2.94369e-11	6.53247e-11	6.28578e-12	-2.78305e-12	0.1191	-2.40132e-12	-1.98375e-12
0.3192	-3.07245e-11	6.3673e-11	8.97038e-12	-2.78417e-12	0.1192	3.1846e-12	-1.3908e-12
0.3193	-3.08321e-11	6.33233e-11	1.18991e-11	-2.05287e-12	0.1193	4.00931e-12	1.15633e-12
0.3194	-3.04515e-11	6.32585e-11	2.67908e-11	-4.37333e-12	0.1194	4.38998e-13	5.30637e-13
0.3195	-2.85246e-11	6.31937e-11	3.44802e-11	-6.32758e-12	0.1195	-1.30074e-12	-2.29132e-12
0.3196	-2.71674e-11	5.99551e-11	2.55682e-11	-4.61972e-12	0.1196	-2.30854e-12	-1.57231e-12
0.3197	-2.8984e-11	5.98089e-11	1.90975e-11	9.29517e-12	0.1197	-9.97456e-13	-1.09658e-12
0.3198	-2.75047e-11	6.10868e-11	1.76317e-11	1.1003e-11	0.1198	1.656e-12	-8.64189e-13
0.3199	-2.39909e-11	6.01268e-11	2.08046e-11	5.87495e-12	0.1199	2.11184e-12	-6.31046e-13
0.32	-2.18605e-11	5.54641e-11	1.60429e-11	-3.40351e-12	0.12	1.10252e-12	-1.12962e-12
0.3201	-2.02999e-11	5.36089e-11	1.14033e-11	-4.62534e-12	0.1201	1.80197e-12	-1.38342e-12
0.3202	-1.89833e-11	5.57414e-11	8.10645e-12	-5.98147e-13	0.1202	2.62329e-12	1.94404e-13
0.3203	-1.89282e-11	5.87284e-11	6.03031e-12	-2.18618e-12	0.1203	2.22382e-12	6.74072e-13
0.3204	-1.50482e-11	6.09015e-11	1.20108e-11	-3.89629e-12	0.1204	-9.83329e-13	4.21698e-13
0.3205	-9.13365e-12	5.86801e-11	1.66485e-11	-6.8271e-12	0.1205	-1.87108e-12	4.76034e-14
0.3206	-7.32886e-12	5.68656e-11	1.23751e-11	-7.68272e-12	0.1206	-2.14836e-12	-4.48263e-13
0.3207	-7.2737e-12	5.50511e-11	1.32287e-11	6.58651e-15	0.1207	-1.57092e-12	-6.99704e-13
0.3208	-1.12062e-11	5.49457e-11	1.50588e-11	6.96347e-12	0.1208	-1.66213e-14	-1.80541e-12
0.3209	-1.34704e-11	5.29277e-11	1.28606e-11	8.06098e-12	0.1209	7.32071e-14	-2.54472e-12
0.321	-1.2398e-11	5.09098e-11	1.42024e-11	6.47294e-12	0.121	4.07622e-13	-2.55148e-12
0.3211	-1.22208e-11	5.08043e-11	1.31028e-11	2.07729e-12	0.1211	1.23085e-12	-1.45953e-12
0.3212	-1.24505e-11	4.95188e-11	1.11488e-11	-4.02735e-12	0.1212	4.678e-13	-9.77921e-13
0.3213	-1.02795e-11	5.0756e-11	8.70642e-12	4.88127e-13	0.1213	1.04823e-12	-4.96324e-13
0.3214	-1.11602e-11	5.3214e-11	1.00482e-11	5.36982e-12	0.1214	2.97223e-12	-2.08998e-12
0.3215	-1.01285e-11	5.24168e-11	1.48081e-11	6.71146e-12	0.1215	2.69982e-12	-2.58505e-12
0.3216	-8.48645e-12	5.33286e-11	2.23755e-11	7.44276e-12	0.1216	3.52699e-12	-1.24909e-12
0.3217	-8.67543e-12	5.19617e-11	2.72573e-11	1.33812e-12	0.1217	1.42545e-12	-1.37797e-12
0.3218	-1.01258e-11	4.71361e-11	1.93218e-11	-2.81339e-12	0.1218	6.67771e-13	-1.99514e-12
0.3219	-9.54173e-12	4.51996e-11	1.74898e-11	3.41107e-12	0.1219	8.87781e-13	-7.81181e-13
0.322	-1.04225e-11	4.78203e-11	1.29723e-11	3.53202e-12	0.122	-6.00015e-13	6.77038e-13
0.3221	-1.05301e-11	4.97087e-11	1.407e-11	5.23988e-12	0.1221	-7.43818e-13	9.14766e-13
0.3222	-1.0475e-11	4.9359e-11	1.5778e-11	2.55321e-12	0.1222	8.22635e-13	1.15277e-12
0.3223	-1.11929e-11	4.78294e-11	1.72419e-11	-1.47624e-12	0.1223	1.16968e-12	5.36647e-13
0.3224	-1.17888e-11	4.61777e-11	1.7241e-11	-5.0174e-12	0.1224	1.88428e-12	1.14163e-12
0.3225	-1.27509e-11	4.25728e-11	1.724e-11	-2.33298e-12	0.1225	2.35605e-12	1.01464e-12
0.3226	-1.23703e-11	4.21825e-11	1.15018e-11	-1.47656e-14	0.1226	2.34093e-12	7.66098e-13
0.3227	-1.42683e-11	4.48439e-11	4.17661e-12	-5.14284e-12	0.1227	1.22863e-12	-4.58435e-13
0.3228	-1.3969e-11	4.55929e-11	1.36804e-12	-9.5385e-12	0.1228	2.68136e-12	-7.05771e-13
0.3229	-1.44021e-11	4.33309e-11	4.54093e-12	-8.19685e-12	0.1229	1.20601e-12	-2.05103e-12
0.323	-1.62594e-11	4.2615e-11	9.05659e-12	-9.54074e-12	0.123	-2.35255e-14	-4.65809e-13
0.3231	-1.50649e-11	4.35268e-11	8.07908e-12	-8.44323e-12	0.1231	1.80038e-12	-1.00416e-13
0.3232	-1.44402e-11	4.19157e-11	6.36915e-12	-5.75881e-12	0.1232	3.13773e-12	1.24255e-12
0.3233	-1.8332e-11	4.15254e-11	6.002e-12	-3.68474e-12	0.1233	1.303e-12	5.11395e-13
0.3234	-2.10437e-11	3.92226e-11	9.78523e-12	-3.89966e-13	0.1234	-7.74098e-13	-8.29003e-13
0.3235	-2.09479e-11	3.87916e-11	1.29581e-11	-2.46628e-12	0.1235	-1.75082e-12	-2.04615e-12
0.3236	-1.97941e-11	3.79944e-11	1.42999e-11	-2.46741e-12	0.1236	-1.01681e-12	-3.75036e-12
0.3237	-1.77045e-11	3.78889e-11	1.259e-11	-4.29959e-12	0.1237	3.2926e-13	-2.27941e-12
0.3238	-1.51266e-11	4.10386e-11	9.65939e-12	-3.9345e-12	0.1238	7.00456e-13	-7.46868e-14
0.3239	-1.60073e-11	4.04855e-11	8.43774e-12	-1.25008e-12	0.1239	3.40877e-13	7.88642e-13
0.324	-2.03874e-11	3.82641e-11	1.28313e-11	-1.00706e-12	0.124	4.7119e-13	7.98851e-13
0.3241	-2.23667e-11	3.70193e-11	1.36849e-11	1.31115e-12	0.1241	2.55626e-12	-2.2413e-12
0.3242	-2.38172e-11	3.74021e-11	1.14867e-11	5.33835e-12	0.1242	2.81189e-12	-3.44899e-12
0.3243	-2.2053e-11	3.78256e-11	1.23402e-11	4.97101e-12	0.1243	3.55742e-12	-2.09176e-12
0.3244	-2.05331e-11	3.67842e-11	9.89786e-12	6.97427e-13	0.1244	2.22939e-12	-1.83169e-12
0.3245	-2.06e-11	3.76146e-11	4.76997e-12	7.2881e-12	0.1245	1.51336e-12	1.38859e-13
0.3246	-1.96497e-11	3.7265e-11	6.72215e-12	1.19257e-11	0.1246	1.89759e-12	5.23973e-13
0.3247	-2.21173e-11	3.69967e-11	1.20923e-11	8.50656e-12	0.1247	1.55097e-12	-1.04257e-12
0.3248	-2.30387e-11	3.27001e-11	1.96597e-11	7.89508e-12	0.1248	1.57213e-12	-7.76637e-13
0.3249	-2.49367e-11	2.66132e-11	1.81939e-11	6.91739e-12	0.1249	-3.58272e-13	-7.5344e-13
0.325	-2.5085e-11	2.50022e-11	1.08688e-11	6.30592e-12	0.125	-2.16506e-12	3.5436e-12
0.3251	-2.46637e-11	2.74601e-11	6.35122e-12	5.93858e-12	0.1251	-1.40683e-12	6.86537e-12
0.3252	-2.64396e-11	2.89416e-11	4.27508e-12	4.83883e-12	0.1252	6.9571e-13	4.08485e-12
0.3253	-2.71169e-11	2.89581e-11	6.34933e-12	2.88458e-12	0.1253	1.21289e-12	-8.91764e-13
0.3254	-2.94625e-11	2.83237e-11	1.12312e-11	-2.36557e-12	0.1254	5.10877e-13	-3.30382e-12
0.3255	-3.03432e-11	2.6672e-11	1.37937e-11	-3.34325e-12	0.1255	-1.89702e-13	-4.12791e-12
0.3256	-3.12239e-11	2.67292e-11	1.35486e-11	6.83942e-13	0.1256	2.28489e-12	-3.36412e-12
0.3257	-2.88901e-11	2.79258e-11	1.00077e-11	2.14766e-12	0.1257	3.90626e-12	-1.58019e-13
0.3258	-2.58239e-11	2.96107e-11	7.80946e-12	1.65826e-12	0.1258	2.23291e-12	2.1944e-12
0.3259	-2.4426e-11	3.13362e-11	1.26913e-11	1.41299e-12	0.1259	7.23926e-14	8.85424e-13
0.326	-2.4615e-11	2.99286e-11	1.61083e-11	1.91167e-13	0.126	-2.20917e-12	6.53496e-14
0.3261	-2.37054e-11	2.69342e-11	1.42763e-11	-1.64101e-12	0.1261	-1.68218e-12	1.44307e-12
0.3262	-2.34061e-11	2.47128e-11	1.36651e-11	-6.65574e-13	0.1262	6.76726e-13	-1.08455e-13
0.3263	-2.9251e-11	2.65604e-11	1.14668e-11	-3.1081e-12	0.1263	2.6702e-12	-2.02579e-12
0.3264	-3.46891e-11	2.49494e-11	1.20763e-11	-3.71958e-12	0.1264	3.3216e-12	-5.52973e-12
0.3265	-3.36574e-11	1.86997e-11	1.26857e-11	-3.7207e-12	0.1265	3.24122e-12	-2.56373e-12
0.3266	-3.0998e-11	1.79839e-11	1.03654e-11	-6.77358e-12	0.1266	-1.24744e-14	1.01274e-12
0.3267	-2.80539e-11	1.99129e-11	1.1341e-11	-7.87334e-12	0.1267	-1.43469e-12	-7.81857e-13
0.3268	-2.58422e-11	2.23708e-11	8.16623e-12	-6.77583e-12	0.1268	1.17176e-12	-2.33237e-12
0.3269	-2.73333e-11	2.46254e-11	3.77075e-12	-5.67832e-12	0.1269	3.77842e-12	-1.31953e-12
0.327	-2.87837e-11	2.32178e-11	7.55399e-12	-3.60425e-12	0.127	1.99064e-12	-2.50422e-12
0.3271	-2.75078e-11	2.08336e-11	1.19476e-11	-4.3378e-12	0.1271	-1.63381e-13	-3.56717e-12
0.3272	-2.7412e-11	1.9833e-11	1.79281e-11	-4.58306e-12	0.1272	1.58871e-12	-1.82294e-12
0.3273	-2.75196e-11	1.86288e-11	2.04906e-11	-2.99727e-12	0.1273	3.21847e-12	-6.89559e-13
0.3274	-2.81155e-11	1.86861e-11	1.42641e-11	6.40102e-12	0.1274	9.41624e-13	-4.1127e-13
0.3275	-2.80197e-11	1.90689e-11	8.89204e-12	9.57373e-12	0.1275	-4.63157e-12	-1.7206e-12
0.3276	-2.75576e-11	1.79868e-11	9.01317e-12	9.32846e-12	0.1276	-5.81079e-12	-1.56587e-12
0.3277	-3.0717e-11	1.57655e-11	9.55583e-13	3.7121e-12	0.1277	-1.98574e-12	-6.92588e-14
0.3278	-3.21267e-11	1.43172e-11	-1.19848e-11	-3.17341e-13	0.1278	3.73745e-13	-7.70887e-13
0.3279	-3.13799e-11	1.352e-11	-1.18637e-11	-4.83507e-12	0.1279	1.51172e-12	-1.83981e-12
0.328	-3.14875e-11	1.41876e-11	-6.73768e-12	-2.32688e-11	0.128	2.0739e-13	-2.05542e-12
0.3281	-3.11882e-11	1.50586e-11	9.73141e-14	-2.66879e-11	0.1281	1.58761e-12	-5.63317e-13
0.3282	-3.05227e-11	1.418e-11	4.4909e-12	-2.07076e-11	0.1282	2.1123e-12	3.17089e-13
0.3283	-3.03048e-11	1.46849e-11	6.19894e-12	-1.71687e-11	0.1283	1.17106e-12	-6.34921e-13
0.3284	-2.77269e-11	1.76718e-11	6.56421e-12	-1.35077e-11	0.1284	-6.258e-13	-3.29733e-12
0.3285	-2.8038e-11	1.6305e-11	5.34256e-12	-9.48048e-12	0.1285	-1.8135e-12	-3.51978e-12
0.3286	-3.09125e-11	1.6525e-11	1.55744e-12	-2.76774e-12	0.1286	-8.05193e-13	-3.25547e-12
0.3287	-3.12643e-11	1.70705e-11	5.21861e-12	5.16571e-12	0.1287	9.34218e-13	3.03169e-13
0.3288	-3.31623e-11	1.72906e-11	4.48524e-12	8.09427e-12	0.1288	-1.32836e-14	7.59722e-14
0.3289	-3.33106e-11	1.48657e-11	1.31047e-12	5.28553e-12	0.1289	-1.3284e-12	7.01579e-13
0.329	-3.24823e-11	1.17492e-11	4.72749e-12	-3.30826e-13	0.129	-2.27871e-12	-2.09253e-12
0.3291	-2.82768e-11	1.10333e-11	7.29002e-12	-8.78118e-14	0.1291	-1.03318e-12	-5.74287e-12
0.3292	-2.6472e-11	1.12127e-11	9.24221e-12	2.71868e-12	0.1292	-3.32226e-14	-4.51216e-12
0.3293	-3.16659e-11	1.29382e-11	1.91704e-12	5.89138e-12	0.1293	-4.99513e-13	-1.20801e-12
0.3294	-3.51508e-11	1.23445e-11	1.06161e-12	6.9889e-12	0.1294	-7.23047e-13	-1.32357e-12
0.3295	-3.54211e-11	1.22796e-11	3.13586e-12	6.74363e-12	0.1295	-2.15529e-13	-7.08449e-13
0.3296	-3.38605e-11	1.15231e-11	4.23355e-12	4.66731e-12	0.1296	-5.63812e-13	-9.49478e-13
0.3297	-3.37239e-11	9.17965e-12	7.40643e-12	7.59939e-13	0.1297	-1.88995e-12	-8.25863e-13
0.3298	-3.50523e-11	8.74864e-12	9.48068e-12	1.97952e-12	0.1298	-7.75962e-13	-1.68029e-12
0.3299	-3.28813e-11	1.02707e-11	6.06177e-12	2.58874e-12	0.1299	-1.51512e-13	-9.47697e-14
0.33	-3.18902e-11	8.90384e-12	7.93799e-14	1.48899e-12	0.13	-3.67875e-12	2.46591e-12
0.3301	-3.16723e-11	7.86249e-12	6.42609e-12	4.78376e-12	0.1301	-3.30104e-12	7.52786e-13
0.3302	-3.58083e-11	7.96042e-12	1.08197e-11	3.43987e-12	0.1302	-3.61201e-13	-2.42645e-12
0.3303	-3.58752e-11	9.36049e-12	1.08187e-11	3.80495e-12	0.1303	3.06559e-12	-2.43302e-12
0.3304	-3.40704e-11	1.15336e-11	7.39983e-12	8.19836e-12	0.1304	4.41588e-12	-3.2952e-12
0.3305	-3.32015e-11	1.3015e-11	4.59126e-12	7.9531e-12	0.1305	3.93804e-13	-2.69363e-12
0.3306	-3.2658e-11	1.26247e-11	5.93309e-12	7.95197e-12	0.1306	-8.94779e-14	-2.70345e-12
0.3307	-3.34981e-11	8.69436e-12	9.96047e-12	6.24187e-12	0.1307	4.02592e-13	-1.73771e-12
0.3308	-3.42974e-11	8.71095e-12	8.12847e-12	1.72414e-12	0.1308	1.13763e-12	-4.06669e-13
0.3309	-3.56258e-11	7.18128e-12	4.83163e-12	-1.0846e-12	0.1309	1.38325e-12	-4.08133e-12
0.331	-3.70355e-11	6.58751e-12	1.41271e-12	7.4533e-13	0.131	1.74979e-12	-5.43739e-12
0.3311	-4.05204e-11	8.6793e-12	4.35211e-13	4.28425e-12	0.1311	-6.92451e-13	-3.132e-12
0.3312	-4.18487e-11	7.55652e-12	-5.40158e-14	5.87003e-12	0.1312	-2.40347e-12	-2.78035e-12
0.3313	-3.9759e-11	7.36967e-12	1.28781e-12	7.82203e-12	0.1313	-2.09444e-13	-7.20249e-13
0.3314	-3.9297e-11	7.58969e-12	6.29175e-12	5.74572e-12	0.1314	1.61719e-12	2.4072e-13
0.3315	-3.9486e-11	7.68763e-12	7.75565e-12	-6.03062e-13	0.1315	1.36744e-12	-1.72849e-12
0.3316	-3.57688e-11	7.66352e-12	7.02229e-12	-4.87665e-12	0.1316	3.84098e-13	-1.62299e-12
0.3317	-3.15225e-11	8.33114e-12	1.65025e-12	-1.17031e-13	0.1317	-1.08873e-12	-1.02964e-12
0.3318	-3.00839e-11	1.01788e-11	6.23897e-14	4.03224e-12	0.1318	6.84348e-16	2.95711e-13
0.3319	-3.34875e-11	9.74776e-12	1.40422e-12	3.54283e-12	0.1319	1.08888e-12	1.86482e-12
0.332	-3.83965e-11	7.60775e-12	4.94331e-12	-6.08681e-13	0.132	-1.12007e-12	2.59675e-13
0.3321	-3.91959e-11	4.89809e-12	5.55272e-12	-6.09805e-13	0.1321	-2.59782e-12	-7.35517e-13
0.3322	-3.79607e-11	7.60023e-12	6.2842e-12	2.19669e-12	0.1322	4.39779e-13	-1.36491e-12
0.3323	-3.70104e-11	1.29472e-11	5.6729e-12	4.88111e-12	0.1323	-5.52198e-13	2.02505e-13
0.3324	-3.84608e-11	1.09699e-11	1.88778e-12	6.4669e-12	0.1324	-8.1301e-13	7.92907e-13
0.3325	-3.88939e-11	7.64993e-12	6.03723e-12	7.56441e-12	0.1325	-4.64752e-13	-4.4824e-13
0.3326	-3.79843e-11	4.45202e-12	1.0675e-11	1.82598e-12	0.1326	-8.50204e-13	-3.03265e-12
0.3327	-3.57319e-11	9.69233e-13	1.04299e-11	-1.59311e-12	0.1327	-7.48718e-13	-1.24399e-13
0.3328	-3.73451e-11	-1.53503e-13	1.07951e-11	9.69243e-13	0.1328	1.30451e-12	2.19838e-13
0.3329	-4.16844e-11	2.54861e-12	1.05501e-11	4.63023e-12	0.1329	5.48741e-13	-1.63373e-12
0.333	-4.04493e-11	3.98934e-12	1.01829e-11	1.09768e-11	0.133	-2.40569e-12	-2.38923e-12
0.3331	-3.9621e-11	3.43622e-12	1.28675e-11	1.31729e-11	0.1331	-3.53044e-12	-3.38947e-12
0.3332	-3.981e-11	9.63772e-12	1.59183e-11	7.67861e-12	0.1332	-2.21514e-12	-4.1462e-12
0.3333	-3.84528e-11	1.1526e-11	1.45746e-11	5.48022e-12	0.1333	-4.12867e-13	-2.34009e-12
0.3334	-3.89266e-11	7.02603e-12	1.1644e-11	5.96738e-12	0.1334	-1.98792e-13	-1.26703e-12
0.3335	-3.81391e-11	5.90327e-12	9.6899e-12	9.26216e-12	0.1335	1.35683e-12	-3.16702e-13
0.3336	-3.97929e-11	3.84464e-12	7.49169e-12	1.01155e-11	0.1336	1.69053e-12	2.09783e-12
0.3337	-3.90054e-11	4.43087e-12	5.90383e-12	1.07248e-11	0.1337	4.36136e-13	3.29101e-12
0.3338	-3.93978e-11	5.13919e-12	7.61187e-12	1.08457e-11	0.1338	3.50969e-14	1.67599e-12
0.3339	-4.22317e-11	3.16193e-12	1.18834e-11	6.45004e-12	0.1339	-3.66992e-13	-1.03822e-12
0.334	-4.49435e-11	7.37107e-13	1.55446e-11	6.32685e-12	0.134	-5.25929e-13	-1.55568e-12
0.3341	-4.52545e-11	-2.09461e-12	1.18815e-11	9.74369e-12	0.1341	-1.97506e-13	-2.9281e-12
0.3342	-4.65422e-11	-3.70566e-12	8.46259e-12	1.07191e-11	0.1342	4.96273e-13	-1.9816e-12
0.3343	-4.65684e-11	-2.30562e-12	7.72922e-12	8.76488e-12	0.1343	-1.00796e-12	-3.11072e-12
0.3344	-4.53739e-11	-9.46267e-13	9.19312e-12	2.66025e-12	0.1344	-3.00111e-12	-2.89744e-12
0.3345	-4.31622e-11	-2.069e-12	9.31425e-12	2.90326e-12	0.1345	-2.18713e-12	-5.24798e-12
0.3346	-4.05843e-11	-2.54072e-12	7.36018e-12	5.58769e-12	0.1346	4.5752e-13	-7.59877e-12
0.3347	-3.41408e-11	-3.26866e-13	6.2606e-12	9.1266e-12	0.1347	4.16358e-13	1.64691e-12
0.3348	-3.38009e-11	3.47389e-12	1.11425e-11	1.09565e-11	0.1348	4.03717e-12	2.83582e-12
0.3349	-3.85878e-11	4.996e-12	1.49257e-11	1.25423e-11	0.1349	4.85035e-12	1.46125e-12
0.335	-4.30086e-11	1.67598e-12	1.56572e-11	1.33957e-11	0.135	2.73393e-12	1.55159e-12
0.3351	-4.51507e-11	1.12288e-12	1.74873e-11	1.29063e-11	0.1351	1.35015e-12	-1.0434e-12
0.3352	-4.43632e-11	1.26155e-12	1.57774e-11	1.10741e-11	0.1352	-8.87785e-13	-1.56288e-12
0.3353	-4.2477e-11	-9.19158e-13	1.10157e-11	9.48607e-12	0.1353	-2.39285e-12	-6.17085e-13
0.3354	-4.15267e-11	-1.06534e-12	5.39951e-12	1.00953e-11	0.1354	-4.79348e-13	-3.21087e-12
0.3355	-4.1797e-11	-8.04628e-13	-1.07117e-12	7.77483e-12	0.1355	9.21208e-14	-3.36271e-12
0.3356	-3.93819e-11	-2.9853e-12	2.46793e-12	4.9661e-12	0.1356	-1.28865e-12	-2.90357e-12
0.3357	-3.89605e-11	-3.29427e-12	4.54218e-12	-1.61982e-13	0.1357	-3.49114e-13	-2.93205e-12
0.3358	-4.17537e-11	-1.89423e-12	3.93088e-12	-2.60451e-12	0.1358	3.52119e-12	-2.22734e-12
0.3359	-4.15358e-11	1.21482e-12	1.85475e-12	3.25374e-12	0.1359	4.46299e-12	3.09286e-13
0.336	-4.0911e-11	1.96381e-12	-2.05245e-12	5.20574e-12	0.136	1.13359e-12	-8.28651e-14
0.3361	-4.19952e-11	-4.61038e-13	1.13743e-11	3.00735e-12	0.1361	8.57301e-13	-1.81682e-12
0.3362	-4.24283e-11	-3.69967e-12	1.82093e-11	-2.8967e-13	0.1362	9.41478e-14	3.56488e-13
0.3363	-4.1478e-11	-4.70034e-12	1.82084e-11	7.76585e-12	0.1363	9.1936e-13	1.67642e-12
0.3364	-4.38236e-11	-4.27687e-12	1.50336e-11	2.18028e-11	0.1364	2.72262e-12	4.34064e-13
0.3365	-4.57623e-11	-3.60926e-12	1.27133e-11	2.03368e-11	0.1365	3.18459e-12	-1.96654e-13
0.3366	-4.62768e-11	-3.59268e-12	8.19579e-12	1.31336e-11	0.1366	-5.02287e-13	1.00504e-12
0.3367	-4.59775e-11	-8.01132e-12	1.00259e-11	5.56409e-12	0.1367	-1.0138e-12	2.08606e-12
0.3368	-4.29113e-11	-8.07612e-12	9.17047e-12	1.04636e-12	0.1368	1.85209e-13	1.21542e-12
0.3369	-3.97637e-11	-5.90299e-12	9.65781e-12	-9.07889e-13	0.1369	1.1416e-12	7.12535e-13
0.337	-4.25976e-11	-6.90366e-12	8.80237e-12	-1.39729e-12	0.137	3.905e-13	3.33317e-13
0.3371	-4.13624e-11	-6.60224e-12	5.74967e-12	-7.88067e-13	0.1371	-2.37068e-13	2.15304e-12
0.3372	-3.911e-11	-3.65599e-12	7.57978e-12	3.72741e-12	0.1372	4.79587e-13	3.48621e-12
0.3373	-3.75493e-11	-2.17457e-12	1.01423e-11	2.99387e-12	0.1373	2.17419e-12	7.92809e-13
0.3374	-4.04239e-11	-3.17522e-12	1.124e-11	6.73407e-13	0.1374	8.59382e-14	1.7636e-13
0.3375	-4.65536e-11	-3.89109e-12	1.07508e-11	3.23576e-12	0.1375	-2.92055e-13	-3.16232e-13
0.3376	-4.4464e-11	-5.82764e-12	1.2825e-11	7.87331e-12	0.1376	2.26088e-12	-5.62927e-13
0.3377	-3.97702e-11	-5.60762e-12	1.59979e-11	1.23888e-11	0.1377	3.83842e-12	-8.07881e-13
0.3378	-3.65005e-11	-3.02755e-12	1.63632e-11	8.48141e-12	0.1378	3.83014e-12	-5.62855e-13
0.3379	-3.47771e-11	-4.23169e-12	1.57519e-11	4.20783e-12	0.1379	1.62566e-12	7.82459e-13
0.338	-3.55358e-11	-7.02274e-12	1.77041e-11	6.66664e-13	0.138	1.25323e-12	1.519e-12
0.3381	-3.58468e-11	-9.16273e-12	1.81914e-11	-5.55164e-13	0.1381	1.37003e-12	-1.28297e-12
0.3382	-3.66868e-11	-1.13841e-11	1.50166e-11	-2.63148e-12	0.1382	-1.07578e-12	-2.49655e-12
0.3383	-3.48007e-11	-1.07979e-11	1.41612e-11	-2.63261e-12	0.1383	-5.91073e-13	-1.14522e-12
0.3384	-3.32807e-11	-7.81092e-12	9.27744e-12	-1.41303e-12	0.1384	1.35926e-12	-1.74566e-12
0.3385	-3.35104e-11	-6.7771e-12	8.17786e-12	1.39347e-12	0.1385	2.69999e-12	-3.44343e-12
0.3386	-3.27635e-11	-7.77777e-12	1.31818e-11	7.00758e-12	0.1386	1.23384e-12	-4.65171e-12
0.3387	-2.93311e-11	-9.02257e-12	1.50119e-11	7.49474e-12	0.1387	-1.08614e-12	-1.70845e-12
0.3388	-2.68752e-11	-1.09591e-11	2.03821e-11	5.66256e-12	0.1388	-5.97858e-13	1.37284e-13
0.3389	-2.51925e-11	-1.09425e-11	1.91604e-11	5.41729e-12	0.1389	6.23444e-13	-1.55601e-12
0.339	-2.53815e-11	-8.60664e-12	1.29339e-11	8.59e-12	0.139	2.21151e-12	-1.9056e-12
0.3391	-2.43091e-11	-7.73558e-12	1.02474e-11	9.93164e-12	0.1391	2.6005e-13	-1.27779e-12
0.3392	-2.46202e-11	-8.85832e-12	9.51402e-12	5.53599e-12	0.1392	-2.17921e-12	1.91424e-12
0.3393	-2.44023e-11	-1.14052e-11	1.14662e-11	2.1169e-12	0.1393	-2.42073e-12	2.90965e-12
0.3394	-2.29637e-11	-1.21618e-11	1.57377e-11	4.55718e-12	0.1394	3.89975e-13	4.87644e-13
0.3395	-2.30713e-11	-1.20231e-11	1.36616e-11	6.99746e-12	0.1395	1.61423e-12	-5.91124e-13
0.3396	-2.63935e-11	-7.81546e-12	1.0731e-11	5.65357e-12	0.1396	3.97536e-13	-6.92982e-13
0.3397	-3.07735e-11	-7.96164e-12	1.48804e-11	1.62412e-12	0.1397	2.79971e-13	-2.74773e-12
0.3398	-3.00673e-11	-1.01423e-11	1.4147e-11	-3.30126e-13	0.1398	1.99402e-12	-2.11675e-12
0.3399	-3.07446e-11	-1.2323e-11	9.38535e-12	5.2324e-13	0.1399	1.87764e-12	-3.56083e-12
0.34	-3.4433e-11	-1.14113e-11	1.2192e-11	1.98696e-12	0.14	9.07482e-13	-3.17375e-12
0.3401	-3.90165e-11	-1.12726e-11	1.24352e-11	6.2583e-12	0.1401	9.14644e-13	1.43121e-13
0.3402	-3.5991e-11	-1.03202e-11	1.07253e-11	4.18198e-12	0.1402	6.78469e-13	8.96557e-13
0.3403	-3.29655e-11	-1.0914e-11	7.55052e-12	1.52534e-13	0.1403	8.09379e-13	1.2838e-12
0.3404	-3.22593e-11	-1.21181e-11	1.01131e-11	5.17621e-13	0.1404	1.30738e-12	1.79312e-12
0.3405	-3.10648e-11	-1.42581e-11	1.37742e-11	1.49306e-12	0.1405	5.85596e-13	-5.05202e-13
0.3406	-2.7551e-11	-1.62353e-11	1.35291e-11	2.70937e-14	0.1406	8.41355e-13	-8.50458e-13
0.3407	-2.7618e-11	-1.77243e-11	1.08426e-11	2.70111e-13	0.1407	8.53969e-13	1.4699e-13
0.3408	-3.00856e-11	-1.6487e-11	8.15615e-12	7.57267e-13	0.1408	-1.08945e-13	4.57316e-14
0.3409	-3.37333e-11	-1.12214e-11	9.62005e-12	6.24931e-12	0.1409	6.38201e-13	1.16509e-12
0.341	-3.50209e-11	-8.35653e-12	1.25488e-11	7.34682e-12	0.141	8.98194e-13	8.1957e-13
0.3411	-3.30126e-11	-1.15138e-11	1.48672e-11	3.31737e-12	0.1411	5.48981e-13	-1.35701e-12
0.3412	-2.96209e-11	-1.65835e-11	1.59649e-11	1.85141e-12	0.1412	2.15408e-12	-3.4115e-12
0.3413	-2.72057e-11	-1.88455e-11	9.98249e-12	2.70477e-12	0.1413	2.05136e-12	-1.31552e-12
0.3414	-2.98362e-11	-1.70793e-11	8.63877e-12	3.92435e-12	0.1414	1.58358e-12	2.92263e-13
0.3415	-3.14493e-11	-1.86089e-11	8.63782e-12	2.8246e-12	0.1415	1.60528e-12	1.91192e-13
0.3416	-3.15976e-11	-2.07896e-11	1.15666e-11	8.70349e-13	0.1416	8.95748e-13	-1.00838e-12
0.3417	-3.40653e-11	-1.98779e-11	1.60822e-11	3.55477e-12	0.1417	9.19813e-13	-1.59742e-12
0.3418	-3.50274e-11	-1.98206e-11	1.59592e-11	5.3847e-12	0.1418	1.67746e-12	-2.7966e-12
0.3419	-3.41991e-11	-1.88274e-11	1.0343e-11	6.116e-12	0.1419	9.71406e-13	-4.48377e-12
0.342	-3.28012e-11	-1.76309e-11	7.90068e-12	4.52796e-12	0.142	-4.65922e-13	-2.63062e-12
0.3421	-3.36006e-11	-1.70446e-11	7.16732e-12	1.47508e-12	0.1421	9.05489e-13	-1.14342e-12
0.3422	-3.48475e-11	-1.76791e-11	7.53258e-12	5.38021e-12	0.1422	1.78971e-12	-1.60911e-12
0.3423	-3.46703e-11	-1.63198e-11	7.2875e-12	6.47772e-12	0.1423	1.94261e-12	-1.34214e-12
0.3424	-3.20517e-11	-1.41873e-11	3.74652e-12	6.11038e-12	0.1424	9.97929e-13	3.89882e-13
0.3425	-3.41124e-11	-1.32349e-11	3.27606e-13	7.5741e-12	0.1425	-6.77861e-14	-6.85514e-13
0.3426	-3.47897e-11	-1.35438e-11	-1.61621e-13	1.03806e-11	0.1426	3.32344e-13	7.03231e-14
0.3427	-3.40022e-11	-1.35272e-11	-6.50844e-13	8.30427e-12	0.1427	2.19827e-12	5.8215e-13
0.3428	-3.45981e-11	-1.1761e-11	-5.29719e-13	2.56585e-12	0.1428	2.80946e-13	8.49903e-13
0.3429	-3.8083e-11	-1.10527e-11	7.96892e-14	-8.53247e-13	0.1429	-7.80999e-13	1.36183e-12
0.343	-4.44162e-11	-1.42099e-11	1.17738e-12	1.83118e-12	0.143	2.33069e-13	-3.86359e-12
0.3431	-4.2652e-11	-1.95237e-11	3.00749e-12	3.66111e-12	0.1431	-9.49041e-14	-6.40353e-12
0.3432	-3.91382e-11	-2.25589e-11	-1.67284e-13	5.2469e-12	0.1432	-1.15465e-12	-2.47386e-12
0.3433	-3.67638e-11	-1.85954e-11	-4.68483e-12	4.14714e-12	0.1433	-9.93163e-13	8.45284e-13
0.3434	-3.78073e-11	-1.5934e-11	-5.29613e-12	2.07082e-12	0.1434	1.73227e-12	1.60071e-12
0.3435	-3.96646e-11	-1.51036e-11	-6.58395e-13	-5.49612e-15	0.1435	1.89459e-12	5.24757e-13
0.3436	-4.01791e-11	-1.49242e-11	6.54281e-12	1.15449e-13	0.1436	3.39996e-12	-1.16195e-12
0.3437	-3.94729e-11	-1.53553e-11	1.06923e-11	-1.10638e-12	0.1437	1.73172e-12	9.35039e-13
0.3438	-3.79529e-11	-1.68442e-11	1.59403e-11	3.89738e-12	0.1438	7.96049e-13	3.45935e-13
0.3439	-3.97288e-11	-1.69497e-11	1.48408e-11	6.45974e-12	0.1439	1.08117e-12	-2.56309e-12
0.344	-4.08944e-11	-1.80318e-11	1.45957e-11	4.38341e-12	0.144	1.36633e-12	-3.2755e-12
0.3441	-4.09613e-11	-1.82187e-11	1.44727e-11	3.03952e-12	0.1441	-5.74896e-14	-2.15758e-12
0.3442	-4.11097e-11	-1.70628e-11	1.42276e-11	-3.43133e-12	0.1442	-2.70206e-12	-4.30073e-13
0.3443	-4.05662e-11	-1.6151e-11	1.3128e-11	-2.08968e-12	0.1443	5.12598e-13	-9.00644e-13
0.3444	-4.00635e-11	-1.85758e-11	-1.39931e-12	2.30373e-12	0.1444	-9.11634e-13	-5.17562e-13
0.3445	-3.96828e-11	-1.68096e-11	-9.70104e-12	5.84264e-12	0.1445	-2.82442e-12	5.97077e-13
0.3446	-4.05229e-11	-1.39447e-11	-5.42952e-12	1.04211e-13	0.1446	-3.02852e-12	3.6803e-13
0.3447	-3.92063e-11	-1.56371e-11	4.09102e-12	-1.82075e-11	0.1447	-2.37846e-12	-2.18132e-12
0.3448	-3.94767e-11	-1.73702e-11	1.06819e-11	-2.00396e-11	0.1448	-1.97291e-12	-1.31369e-12
0.3449	-3.95437e-11	-1.84523e-11	1.15354e-11	-1.16179e-11	0.1449	1.60606e-12	-1.30157e-12
0.345	-4.18078e-11	-1.32681e-11	9.09307e-12	3.43857e-13	0.145	7.90031e-13	-2.99949e-12
0.3451	-4.3421e-11	-9.18248e-12	7.38314e-12	7.30074e-12	0.1451	-1.85755e-12	-2.01292e-12
0.3452	-4.59293e-11	-1.02238e-11	8.72497e-12	7.7879e-12	0.1452	-8.43577e-13	-3.46881e-12
0.3453	-4.64032e-11	-1.17942e-11	6.64883e-12	7.05435e-12	0.1453	1.39049e-12	-3.33884e-12
0.3454	-4.40287e-11	-1.57245e-11	9.33343e-12	5.22217e-12	0.1454	-7.70644e-13	-1.25679e-12
0.3455	-4.26715e-11	-1.47721e-11	1.11635e-11	3.39e-12	0.1455	2.4133e-13	-1.37307e-12
0.3456	-4.16805e-11	-1.69528e-11	7.62256e-12	6.92891e-12	0.1456	1.86286e-12	-1.97875e-12
0.3457	-4.24391e-11	-1.97031e-11	5.18021e-12	9.49126e-12	0.1457	1.77454e-12	-2.5856e-12
0.3458	-3.70943e-11	-1.98086e-11	7.98689e-12	7.90323e-12	0.1458	1.92947e-12	-2.09497e-12
0.3459	-3.61033e-11	-2.06872e-11	1.09156e-11	5.70484e-12	0.1459	6.18578e-13	-1.36135e-12
0.346	-3.92219e-11	-2.14438e-11	1.37223e-11	3.75059e-12	0.146	1.25978e-12	-2.70401e-12
0.3461	-4.31951e-11	-2.36245e-11	1.1402e-11	6.43501e-12	0.1461	6.79211e-13	-2.58288e-12
0.3462	-4.3669e-11	-2.10444e-11	8.59346e-12	1.14388e-11	0.1462	1.80649e-12	-6.31668e-13
0.3463	-4.10504e-11	-1.75692e-11	8.59252e-12	1.33908e-11	0.1463	-8.51608e-13	8.30318e-13
0.3464	-4.34366e-11	-1.77967e-11	7.85915e-12	1.21689e-11	0.1464	-1.06956e-12	-3.94156e-13
0.3465	-4.52939e-11	-1.78616e-11	1.04217e-11	1.09471e-11	0.1465	9.08464e-13	-1.86367e-12
0.3466	-4.36926e-11	-1.85774e-11	9.07797e-12	8.38252e-12	0.1466	-8.9903e-13	-2.47957e-12
0.3467	-4.37188e-11	-1.74215e-11	9.19909e-12	7.64897e-12	0.1467	-2.58586e-12	-5.53772e-12
0.3468	-4.0856e-11	-1.4109e-11	1.0663e-11	7.28164e-12	0.1468	-1.34448e-12	-2.73731e-12
0.3469	-3.86443e-11	-1.09186e-11	5.53509e-12	6.67016e-12	0.1469	-1.81361e-12	3.23615e-12
0.347	-3.8223e-11	-8.66408e-12	7.60935e-12	8.25595e-12	0.147	-1.06359e-12	2.3729e-12
0.3471	-3.99582e-11	-5.10746e-12	1.2125e-11	2.27338e-12	0.1471	-6.81368e-13	1.26474e-12
0.3472	-4.05948e-11	-4.35848e-12	1.29786e-11	2.76054e-12	0.1472	-1.52144e-12	-1.18692e-12
0.3473	-3.9319e-11	-4.42328e-12	1.06583e-11	7.52016e-12	0.1473	-5.3207e-13	-3.88341e-12
0.3474	-3.8979e-11	-5.6681e-12	1.02911e-11	9.7163e-12	0.1474	-1.25327e-12	-3.28463e-12
0.3475	-4.00632e-11	-2.03009e-12	1.11447e-11	1.14242e-11	0.1475	-7.55359e-13	-1.58786e-12
0.3476	-4.2897e-11	1.11961e-12	1.15099e-11	1.26437e-11	0.1476	5.95424e-13	-8.68241e-13
0.3477	-4.22722e-11	2.07206e-12	1.37063e-11	1.00791e-11	0.1477	6.0178e-13	-2.71371e-14
0.3478	-4.08336e-11	1.0714e-12	1.93205e-11	7.39247e-12	0.1478	-4.92197e-13	-1.13969e-12
0.3479	-4.03309e-11	-1.10931e-12	2.20051e-11	5.07201e-12	0.1479	1.46388e-12	-1.88654e-12
0.348	-3.94213e-11	-1.74378e-12	1.76097e-11	5.68124e-12	0.148	2.19753e-12	-1.90146e-12
0.3481	-4.2133e-11	1.28386e-12	1.49232e-11	1.04409e-11	0.1481	2.43904e-13	-2.89338e-12
0.3482	-4.41531e-11	5.28806e-12	1.77299e-11	1.16604e-11	0.1482	-1.83351e-12	-1.44434e-12
0.3483	-4.07614e-11	4.45017e-12	2.07807e-11	9.09584e-12	0.1483	-7.38814e-13	1.26331e-13
0.3484	-3.65965e-11	1.86255e-12	1.87045e-11	6.16502e-12	0.1484	8.42449e-13	4.75901e-13
0.3485	-3.7518e-11	1.91984e-12	1.65063e-11	7.3846e-12	0.1485	-1.97249e-12	-1.51467e-13
0.3486	-3.72594e-11	3.31986e-12	1.2355e-11	9.58074e-12	0.1486	-2.83597e-12	-2.12195e-12
0.3487	-3.59428e-11	5.1268e-12	1.00347e-11	1.33638e-11	0.1487	-4.06725e-12	-1.52932e-12
0.3488	-3.57249e-11	7.82893e-12	8.69099e-12	1.3973e-11	0.1488	-4.93391e-12	2.83665e-13
0.3489	-3.92098e-11	9.96139e-12	8.20177e-12	9.69944e-12	0.1489	-2.99449e-12	1.24181e-12
0.349	-4.00906e-11	8.5945e-12	9.05531e-12	7.13484e-12	0.149	-1.30072e-12	-4.85959e-13
0.3491	-3.94251e-11	3.6469e-12	1.46696e-11	9.57513e-12	0.1491	1.49022e-12	-9.93407e-13
0.3492	-3.75389e-11	5.30331e-13	1.50349e-11	1.01844e-11	0.1492	1.9604e-12	-1.01296e-12
0.3493	-3.71582e-11	1.32001e-12	1.23484e-11	7.13147e-12	0.1493	-9.88755e-13	-1.5212e-12
0.3494	-4.06431e-11	4.14419e-12	1.35681e-11	4.56687e-12	0.1494	-1.49784e-12	-1.05326e-12
0.3495	-4.27852e-11	5.70701e-12	1.30789e-11	5.37428e-13	0.1495	-2.74062e-12	-1.56227e-12
0.3496	-4.34218e-11	5.88634e-12	1.33221e-11	4.14232e-13	0.1496	-8.10776e-13	-2.3158e-12
0.3497	-4.10067e-11	2.11872e-12	1.6495e-11	7.12698e-12	0.1497	1.48413e-12	-3.55798e-12
0.3498	-3.90798e-11	1.7284e-12	1.4663e-11	1.02997e-11	0.1498	1.21448e-12	-2.84739e-12
0.3499	-3.80888e-11	8.09264e-12	9.29096e-12	1.22517e-11	0.1499	9.43823e-13	-3.35785e-12
0.35	-3.89288e-11	8.27198e-12	8.19138e-12	1.06636e-11	0.15	1.16053e-12	-9.38985e-13
0.3501	-3.87109e-11	5.48093e-12	1.12422e-11	6.02385e-12	0.1501	3.36424e-14	-1.45019e-12
0.3502	-3.69875e-11	5.57888e-12	1.40489e-11	7.3655e-12	0.1502	2.48803e-13	-1.96177e-12
0.3503	-3.64034e-11	4.41547e-12	1.28272e-11	6.75402e-12	0.1503	1.31783e-12	1.55462e-12
0.3504	-3.67145e-11	3.69962e-12	1.11173e-11	1.00488e-11	0.1504	2.02015e-12	7.75622e-12
0.3505	-3.788e-11	4.52999e-12	7.94252e-12	1.50526e-11	0.1505	1.74547e-12	4.92434e-12
0.3506	-4.00222e-11	7.47625e-12	6.96502e-12	1.34645e-11	0.1506	-4.82686e-13	-2.42439e-12
0.3507	-4.60705e-11	7.5335e-12	1.14807e-11	1.37075e-11	0.1507	-3.91746e-13	-4.15812e-12
0.3508	-4.6585e-11	6.73628e-12	1.42873e-11	1.35843e-11	0.1508	-6.67176e-13	-6.62448e-12
0.3509	-4.42106e-11	3.90456e-12	1.50188e-11	1.08977e-11	0.1509	-3.32321e-13	-5.42891e-12
0.351	-4.30975e-11	4.24664e-12	1.44075e-11	1.13848e-11	0.151	6.12899e-13	-5.69832e-12
0.3511	-4.26355e-11	8.37294e-12	1.13548e-11	1.0163e-11	0.1511	1.68025e-12	-4.74715e-12
0.3512	-4.36789e-11	1.40047e-11	1.39174e-11	1.12605e-11	0.1512	1.16081e-12	-3.1857e-12
0.3513	-4.16707e-11	1.7602e-11	1.46488e-11	1.37008e-11	0.1513	2.75334e-13	1.6716e-12
0.3514	-3.893e-11	2.06704e-11	1.72114e-11	7.47408e-12	0.1514	-1.83061e-12	5.06408e-12
0.3515	-3.77355e-11	2.58953e-11	1.95298e-11	6.00812e-12	0.1515	3.36164e-13	5.22038e-13
0.3516	-3.96742e-11	2.6807e-11	2.03833e-11	9.42496e-12	0.1516	2.50324e-12	-2.06676e-12
0.3517	-4.20605e-11	2.8085e-11	1.6354e-11	1.33301e-11	0.1517	1.49682e-12	-1.60367e-12
0.3518	-4.05812e-11	3.15195e-11	1.47662e-11	1.22303e-11	0.1518	-1.58447e-12	4.46505e-13
0.3519	-4.09736e-11	3.23906e-11	1.6108e-11	1.29616e-11	0.1519	-4.29922e-12	1.88651e-12
0.352	-4.18137e-11	3.12272e-11	1.26891e-11	1.43033e-11	0.152	-2.37496e-12	8.85348e-13
0.3521	-4.17178e-11	3.06334e-11	6.21844e-12	1.29594e-11	0.1521	-1.18276e-12	-1.70242e-12
0.3522	-4.0442e-11	2.8941e-11	3.2878e-12	1.14934e-11	0.1522	-2.55369e-12	-9.93932e-13
0.3523	-3.81082e-11	2.83879e-11	4.62963e-12	1.18585e-11	0.1523	-2.21528e-12	1.42394e-12
0.3524	-3.55303e-11	2.83638e-11	6.2156e-12	5.998e-12	0.1524	1.98663e-13	2.62156e-12
0.3525	-3.16503e-11	2.80142e-11	5.48224e-12	5.99688e-12	0.1525	4.93225e-12	1.6224e-12
0.3526	-2.90724e-11	2.89259e-11	8.77719e-12	5.50747e-12	0.1526	4.29504e-12	-1.93968e-12
0.3527	-2.85696e-11	2.93087e-11	2.07391e-11	3.67529e-12	0.1527	2.19326e-12	-1.4728e-12
0.3528	-2.96131e-11	2.8837e-11	3.05038e-11	4.52866e-12	0.1528	9.46227e-13	3.37556e-13
0.3529	-2.91104e-11	2.60053e-11	2.25683e-11	9.04414e-12	0.1529	-5.44698e-13	-1.87962e-12
0.353	-2.89332e-11	2.57777e-11	1.52431e-11	2.25928e-11	0.153	-2.04361e-13	-4.21801e-12
0.3531	-2.56635e-11	2.79508e-11	1.07256e-11	2.43007e-11	0.1531	-3.52116e-13	-2.52717e-12
0.3532	-2.19463e-11	2.61364e-11	1.24336e-11	1.70974e-11	0.1532	5.98914e-13	-9.57436e-13
0.3533	-1.9287e-11	2.26129e-11	1.53624e-11	1.17252e-11	0.1533	9.3974e-13	7.35387e-13
0.3534	-1.45932e-11	1.68922e-11	1.18214e-11	1.18461e-11	0.1534	7.92404e-13	4.76149e-13
0.3535	-9.16691e-12	1.81701e-11	6.57143e-12	1.50188e-11	0.1535	4.01029e-13	3.40124e-13
0.3536	-8.25727e-12	1.94074e-11	5.71599e-12	1.40412e-11	0.1536	2.08493e-12	1.67012e-12
0.3537	-1.28815e-11	2.1784e-11	1.18186e-11	1.45283e-11	0.1537	1.44954e-12	-2.94547e-13
0.3538	-1.22974e-11	2.31434e-11	1.43811e-11	9.27817e-12	0.1538	2.03833e-13	9.15905e-13
0.3539	-1.07367e-11	2.40551e-11	1.71878e-11	6.59149e-12	0.1539	-1.87348e-13	-3.13711e-13
0.354	-1.21871e-11	2.43159e-11	2.06048e-11	7.44486e-12	0.154	-2.1229e-13	-2.03026e-12
0.3541	-1.89679e-11	2.35186e-11	1.37679e-11	1.00072e-11	0.1541	6.99094e-15	-1.42608e-12
0.3542	-2.07031e-11	2.264e-11	8.27381e-12	1.28137e-11	0.1542	-5.06033e-13	-9.42531e-13
0.3543	-1.91832e-11	2.10697e-11	8.51701e-12	1.56202e-11	0.1543	5.68052e-13	-4.5758e-13
0.3544	-1.90467e-11	2.15338e-11	1.1934e-11	1.59853e-11	0.1544	-3.10751e-13	-3.37439e-13
0.3545	-1.73639e-11	2.21608e-11	1.30317e-11	1.22e-11	0.1545	-1.43341e-12	-1.43664e-12
0.3546	-1.82853e-11	1.8149e-11	1.47398e-11	1.21989e-11	0.1546	-1.1432e-13	-1.55792e-12
0.3547	-1.99799e-11	1.5887e-11	1.63257e-11	1.58599e-11	0.1547	1.44929e-12	-1.67789e-12
0.3548	-1.95585e-11	1.71242e-11	1.71793e-11	1.42718e-11	0.1548	1.79266e-12	-5.7585e-13
0.3549	-1.74689e-11	1.60422e-11	2.09625e-11	1.25617e-11	0.1549	1.16001e-12	2.11439e-12
0.355	-1.63151e-11	1.71981e-11	2.5234e-11	1.3293e-11	0.155	4.05906e-13	1.2659e-12
0.3551	-1.69517e-11	1.59126e-11	1.93737e-11	1.1705e-11	0.1551	-2.17854e-12	-1.90065e-12
0.3552	-1.87683e-11	1.43016e-11	1.85183e-11	1.47556e-11	0.1552	-6.11807e-13	-4.57763e-12
0.3553	-1.85911e-11	1.27719e-11	1.50994e-11	1.5609e-11	0.1553	2.54268e-12	-3.22499e-12
0.3554	-1.79256e-11	1.53519e-11	1.13142e-11	1.31664e-11	0.1554	1.30352e-12	8.145e-13
0.3555	-1.94167e-11	1.82575e-11	1.27781e-11	1.46302e-11	0.1555	5.53598e-13	1.43735e-12
0.3556	-2.11112e-11	1.82741e-11	1.35096e-11	1.36525e-11	0.1556	9.03303e-13	1.08501e-12
0.3557	-2.07306e-11	1.83314e-11	1.55839e-11	1.10879e-11	0.1557	6.43699e-13	3.6778e-13
0.3558	-1.97395e-11	1.36686e-11	1.50946e-11	1.02323e-11	0.1558	5.07226e-13	1.40114e-13
0.3559	-1.74465e-11	1.26272e-11	1.60703e-11	1.30387e-11	0.1559	1.22631e-12	1.86679e-12
0.356	-1.65368e-11	1.48003e-11	1.75342e-11	1.79204e-11	0.156	1.45821e-12	1.03114e-12
0.3561	-1.67665e-11	1.65666e-11	1.75332e-11	1.54779e-11	0.1561	8.36772e-13	-7.80006e-13
0.3562	-1.86238e-11	1.58914e-11	1.80206e-11	6.32151e-12	0.1562	-1.00418e-12	3.39537e-13
0.3563	-1.84873e-11	1.35073e-11	1.77755e-11	-7.59693e-13	0.1563	-7.68694e-13	7.27643e-13
0.3564	-2.02632e-11	1.10825e-11	1.96056e-11	1.92473e-12	0.1564	2.00506e-13	-5.92285e-13
0.3565	-2.0086e-11	1.04887e-11	1.97267e-11	7.66091e-12	0.1565	1.2931e-12	-8.02032e-14
0.3566	-2.34895e-11	1.16853e-11	1.58195e-11	1.1566e-11	0.1566	1.28842e-12	1.88694e-13
0.3567	-3.12062e-11	1.21901e-11	1.55744e-11	9.73386e-12	0.1567	1.7734e-12	9.46775e-13
0.3568	-3.12324e-11	1.24102e-11	1.93577e-11	6.5589e-12	0.1568	9.1702e-13	1.18769e-13
0.3569	-2.65793e-11	1.27116e-11	2.25305e-11	8.75505e-12	0.1569	1.84161e-13	-2.20188e-13
0.357	-2.49779e-11	1.22399e-11	2.05765e-11	9.48635e-12	0.157	4.29313e-13	1.51678e-12
0.3571	-2.50449e-11	1.01812e-11	1.789e-11	1.05839e-11	0.1571	2.26282e-12	-1.14011e-12
0.3572	-2.47863e-11	9.22126e-12	1.76449e-11	1.22917e-11	0.1572	2.75498e-12	-2.33153e-12
0.3573	-2.30222e-11	1.20454e-11	1.88647e-11	1.14361e-11	0.1573	1.66163e-12	-2.66792e-12
0.3574	-2.50422e-11	1.44221e-11	1.83754e-11	7.89494e-12	0.1574	3.86559e-12	-4.34661e-12
0.3575	-2.5394e-11	1.34214e-11	1.61772e-11	7.77174e-12	0.1575	3.01919e-12	-3.94966e-12
0.3576	-2.58271e-11	1.1729e-11	1.70308e-11	1.35079e-11	0.1576	4.65225e-13	-2.20952e-12
0.3577	-2.76844e-11	1.23559e-11	1.54429e-11	1.71689e-11	0.1577	2.32031e-13	-1.68973e-12
0.3578	-2.66527e-11	1.61567e-11	1.11695e-11	1.66795e-11	0.1578	1.70925e-12	-2.02417e-12
0.3579	-2.30576e-11	1.66208e-11	1.39762e-11	1.69225e-11	0.1579	3.55408e-12	-7.71503e-13
0.358	-2.61355e-11	1.3138e-11	1.59284e-11	1.22827e-11	0.158	1.98228e-12	-1.34977e-12
0.3581	-2.90915e-11	9.45182e-12	2.06882e-11	1.05726e-11	0.1581	-1.54136e-12	-2.18986e-13
0.3582	-2.97688e-11	4.34144e-12	1.849e-11	1.28908e-11	0.1582	-1.7679e-12	5.72719e-14
0.3583	-3.04867e-11	4.96836e-12	1.55593e-11	1.21573e-11	0.1583	8.18963e-14	6.99656e-13
0.3584	-2.90481e-11	8.64704e-12	1.58025e-11	1.17899e-11	0.1584	1.81069e-12	-1.22927e-13
0.3585	-2.95219e-11	9.88433e-12	1.55574e-11	1.36199e-11	0.1585	2.44573e-13	-2.41055e-12
0.3586	-3.1542e-11	9.08709e-12	1.66551e-11	1.43512e-11	0.1586	-9.99227e-14	-2.62322e-12
0.3587	-3.45793e-11	7.27263e-12	1.78749e-11	1.4228e-11	0.1587	-8.09777e-13	-1.49344e-12
0.3588	-3.39952e-11	6.35332e-12	1.81181e-11	1.34944e-11	0.1588	-1.03058e-12	8.56721e-13
0.3589	-3.32483e-11	5.88162e-12	1.4333e-11	1.37375e-11	0.1589	-6.40321e-13	5.20965e-13
0.359	-3.14028e-11	7.44442e-12	1.27451e-11	1.12949e-11	0.159	-5.30739e-15	-2.37868e-12
0.3591	-3.11442e-11	8.88514e-12	1.15235e-11	1.00731e-11	0.1591	1.4195e-13	-7.62172e-13
0.3592	-3.36119e-11	8.82033e-12	9.81353e-12	9.46162e-12	0.1592	4.11718e-13	2.07456e-12
0.3593	-3.47775e-11	7.45346e-12	7.12704e-12	7.01909e-12	0.1593	5.59763e-13	2.59145e-12
0.3594	-3.61058e-11	5.80174e-12	4.44054e-12	1.23891e-11	0.1594	7.08083e-13	7.88498e-13
0.3595	-3.67424e-11	8.46316e-12	3.82925e-12	1.67825e-11	0.1595	6.1246e-13	-1.3812e-12
0.3596	-4.02273e-11	9.13079e-12	1.0176e-11	1.67813e-11	0.1596	6.39008e-13	-2.55554e-13
0.3597	-4.43632e-11	6.82802e-12	9.80881e-12	1.55595e-11	0.1597	5.4353e-13	-5.23402e-12
0.3598	-4.44708e-11	4.56595e-12	6.02368e-12	1.11639e-11	0.1598	-6.5062e-13	-4.71993e-12
0.3599	-4.09977e-11	5.03013e-12	7.8538e-12	8.23305e-12	0.1599	-5.02081e-13	-2.0092e-12
0.36	-3.63039e-11	6.6743e-12	7.2425e-12	4.81396e-12	0.16	1.34584e-13	-1.98461e-12
0.3601	-3.36039e-11	6.77225e-12	5.16636e-12	9.45151e-12	0.1601	6.48951e-13	-2.32681e-12
0.3602	-3.13515e-11	7.64333e-12	2.96815e-12	1.86057e-11	0.1602	2.74992e-12	-3.15787e-12
0.3603	-3.39819e-11	8.96199e-12	4.30998e-12	1.73838e-11	0.1603	2.40908e-12	-2.03641e-12
0.3604	-3.61241e-11	9.182e-12	1.00463e-11	1.45751e-11	0.1604	1.5795e-12	-5.49349e-13
0.3605	-3.672e-11	9.03583e-12	1.34634e-11	1.54285e-11	0.1605	6.27355e-13	-1.38221e-12
0.3606	-3.71938e-11	6.69237e-12	8.70168e-12	1.71363e-11	0.1606	1.74985e-12	-2.33771e-12
0.3607	-3.57959e-11	4.14546e-12	7.23589e-12	2.09194e-11	0.1607	3.35998e-12	-2.31718e-12
0.3608	-3.80601e-11	3.42962e-12	1.04088e-11	2.82425e-11	0.1608	8.19001e-13	-1.07647e-12
0.3609	-3.88594e-11	3.16137e-12	9.67541e-12	2.61661e-11	0.1609	-2.45517e-12	1.14025e-12
0.361	-4.0025e-11	1.14344e-12	4.42544e-12	2.33574e-11	0.161	-1.09151e-12	-6.7193e-13
0.3611	-3.98885e-11	1.11933e-12	-9.61358e-12	2.00604e-11	0.1611	-1.68184e-12	-1.14192e-12
0.3612	-4.01995e-11	3.86215e-12	-4.60965e-12	1.45661e-11	0.1612	-2.51725e-12	-8.80073e-13
0.3613	-4.03072e-11	2.53594e-12	2.72222e-13	4.67728e-12	0.1613	-1.40051e-12	-1.1071e-12
0.3614	-3.86651e-11	2.26767e-12	4.66581e-12	-4.72326e-12	0.1614	-1.50554e-12	-2.06717e-12
0.3615	-3.94238e-11	2.73185e-12	8.2049e-12	-2.40505e-12	0.1615	-1.46821e-13	-1.1968e-12
0.3616	-3.97755e-11	1.48703e-12	6.25083e-12	3.45321e-12	0.1616	1.12147e-13	6.49474e-13
0.3617	-3.98425e-11	3.78225e-12	8.6913e-12	5.52728e-12	0.1617	-1.46107e-12	1.15225e-12
0.3618	-4.25542e-11	1.07259e-12	9.78899e-12	9.18827e-12	0.1618	-8.38181e-13	-1.15333e-12
0.3619	-4.60392e-11	-9.45135e-15	1.1375e-11	1.2361e-11	0.1619	-1.19304e-12	-3.5818e-12
0.362	-4.23626e-11	-3.9979e-13	1.44258e-11	9.06394e-12	0.162	1.50265e-12	-1.00624e-12
0.3621	-4.46268e-11	1.05059e-13	1.21055e-11	8.69661e-12	0.1621	1.9998e-12	5.91844e-13
0.3622	-4.61993e-11	1.17957e-12	1.00294e-11	9.18377e-12	0.1622	1.15289e-12	-2.08349e-12
0.3623	-4.56965e-11	-1.57077e-12	7.95321e-12	7.35159e-12	0.1623	1.82621e-13	-3.53919e-12
0.3624	-4.31593e-11	-6.07079e-12	1.18585e-11	6.00769e-12	0.1624	-5.6532e-14	-3.89738e-12
0.3625	-3.73668e-11	-9.55358e-12	1.73507e-11	9.66868e-12	0.1625	-2.96993e-13	-3.64643e-12
0.3626	-3.82069e-11	-8.51975e-12	1.39318e-11	1.32076e-11	0.1626	-1.7257e-13	-1.32152e-12
0.3627	-4.15697e-11	-5.53277e-12	1.18557e-11	1.19858e-11	0.1627	8.05011e-13	-1.31723e-12
0.3628	-4.45256e-11	-4.66173e-12	9.1692e-12	1.06419e-11	0.1628	5.60541e-13	-7.03921e-13
0.3629	-4.36974e-11	-3.66858e-12	7.21513e-12	1.40587e-11	0.1629	8.03009e-13	-1.06851e-12
0.363	-4.4985e-11	-5.03548e-12	7.33625e-12	1.61328e-11	0.163	4.33788e-13	-2.2889e-12
0.3631	-4.52554e-11	-7.37892e-12	8.67808e-12	1.66199e-11	0.1631	1.65018e-12	-1.92368e-12
0.3632	-4.45085e-11	-6.87407e-12	7.45644e-12	1.57643e-11	0.1632	1.0342e-12	-1.19358e-12
0.3633	-4.39651e-11	-7.06092e-12	3.18303e-12	1.63736e-11	0.1633	-1.41416e-12	3.89654e-13
0.3634	-4.32996e-11	-7.65471e-12	4.52486e-12	1.33207e-11	0.1634	-2.01718e-13	1.11703e-12
0.3635	-4.31224e-11	-7.23124e-12	5.50048e-12	7.33811e-12	0.1635	-8.91613e-14	1.19878e-14
0.3636	-4.21314e-11	-7.4588e-12	1.11148e-11	2.82038e-12	0.1636	-1.56472e-12	-2.31512e-12
0.3637	-4.12625e-11	-8.37809e-12	1.50201e-11	7.70207e-12	0.1637	-1.08828e-12	-3.54494e-12
0.3638	-4.20618e-11	-9.33808e-12	1.06246e-11	1.00203e-11	0.1638	-1.34532e-12	-2.21262e-12
0.3639	-4.06232e-11	-8.06013e-12	6.59534e-12	1.28268e-11	0.1639	-7.48857e-13	-2.34648e-12
0.364	-3.89812e-11	-6.90422e-12	7.20474e-12	9.04147e-12	0.164	9.08509e-14	-3.45815e-12
0.3641	-3.87633e-11	-7.25386e-12	7.44794e-12	9.40656e-12	0.1641	-4.13026e-13	-2.98414e-12
0.3642	-4.1353e-11	-8.90556e-12	1.02546e-11	1.27013e-11	0.1642	-1.16174e-12	-2.75544e-12
0.3643	-4.43089e-11	-1.11676e-11	1.17185e-11	1.05029e-11	0.1643	-3.24154e-13	-2.28369e-12
0.3644	-4.84448e-11	-1.35518e-11	1.01307e-11	1.0746e-11	0.1644	-5.85737e-13	1.81183e-14
0.3645	-4.81863e-11	-1.15414e-11	5.00276e-12	1.37966e-11	0.1645	-7.25742e-13	2.43828e-13
0.3646	-4.5649e-11	-8.67651e-12	7.07701e-12	1.50162e-11	0.1646	-4.99933e-13	-1.1182e-12
0.3647	-4.46173e-11	-1.01655e-11	7.32021e-12	1.4893e-11	0.1647	9.17755e-14	-1.38234e-12
0.3648	-4.50505e-11	-1.20206e-11	7.19719e-12	1.0009e-11	0.1648	3.17072e-13	-2.74576e-12
0.3649	-4.57278e-11	-1.45675e-11	1.35439e-11	1.12286e-11	0.1649	9.08487e-13	-3.37735e-12
0.365	-4.2336e-11	-1.60565e-11	1.37871e-11	1.85517e-11	0.165	7.67463e-13	-2.05633e-12
0.3651	-3.92291e-11	-1.35985e-11	1.0124e-11	2.23348e-11	0.1651	1.35895e-12	-9.79877e-13
0.3652	-4.17375e-11	-9.26879e-12	7.92584e-12	1.84274e-11	0.1652	7.299e-13	-1.12447e-12
0.3653	-4.35948e-11	-8.07221e-12	1.5127e-11	1.69614e-11	0.1653	-7.53383e-13	-2.85624e-12
0.3654	-4.34989e-11	-1.07818e-11	1.78116e-11	1.36644e-11	0.1654	-2.83215e-13	-3.12333e-12
0.3655	-4.46645e-11	-1.25963e-11	1.51252e-11	8.53633e-12	0.1655	2.75083e-12	-1.80357e-12
0.3656	-4.46907e-11	-1.11149e-11	1.26828e-11	7.92486e-12	0.1656	3.46603e-12	-1.17567e-13
0.3657	-4.39439e-11	-1.18715e-11	9.50803e-12	7.92373e-12	0.1657	3.97599e-13	1.3244e-12
0.3658	-4.57198e-11	-1.29128e-11	8.89674e-12	9.14331e-12	0.1658	3.81559e-13	2.15618e-12
0.3659	-4.65191e-11	-1.253e-11	9.50615e-12	9.63047e-12	0.1659	-6.10349e-13	6.68873e-13
0.366	-4.42667e-11	-9.33963e-12	1.2557e-11	1.06059e-11	0.166	4.73654e-13	-2.64914e-12
0.3661	-4.2584e-11	-7.69545e-12	1.4265e-11	1.20696e-11	0.1661	1.43632e-12	-3.8915e-12
0.3662	-4.33833e-11	-7.63821e-12	1.26771e-11	9.6271e-12	0.1662	9.34865e-13	-1.95951e-12
0.3663	-4.39385e-11	-8.27267e-12	1.60942e-11	9.25976e-12	0.1663	6.78291e-13	-1.36969e-12
0.3664	-4.5389e-11	-5.73331e-12	1.51167e-11	9.99106e-12	0.1664	-6.58527e-14	-9.01315e-13
0.3665	-4.83449e-11	1.68888e-12	8.52392e-12	8.5251e-12	0.1665	-1.17548e-12	5.5996e-14
0.3666	-4.89815e-11	3.37375e-12	7.66848e-12	7.54741e-12	0.1666	-4.53325e-13	1.50229e-12
0.3667	-4.62001e-11	-3.1201e-12	1.40152e-11	7.30214e-12	0.1667	1.36823e-12	1.24031e-12
0.3668	-4.47615e-11	-4.4463e-12	1.86529e-11	5.83618e-12	0.1668	2.58019e-12	-1.1955e-13
0.3669	-4.51539e-11	-1.74417e-12	1.6943e-11	3.75986e-12	0.1669	2.20602e-12	-1.72278e-12
0.367	-4.40409e-11	-7.51045e-13	1.47448e-11	4.85737e-12	0.167	2.93124e-12	-5.17587e-13
0.3671	-4.47181e-11	-2.07725e-12	1.76735e-11	7.41972e-12	0.1671	1.70412e-12	2.64151e-12
0.3672	-4.42968e-11	-3.9324e-12	1.87712e-11	7.29652e-12	0.1672	-9.87057e-13	7.96536e-13
0.3673	-4.26954e-11	-4.81103e-12	1.81599e-11	6.80712e-12	0.1673	7.17103e-13	-2.7566e-12
0.3674	-4.4512e-11	-6.09651e-12	1.88914e-11	9.12533e-12	0.1674	1.68964e-12	-2.76888e-12
0.3675	-4.42128e-11	-6.48685e-12	2.14539e-11	1.02228e-11	0.1675	1.68637e-12	-1.80381e-12
0.3676	-4.37914e-11	-6.42958e-12	1.75467e-11	8.87894e-12	0.1676	5.85177e-13	-2.2764e-13
0.3677	-4.53639e-11	-5.80266e-12	1.66913e-11	9.24403e-12	0.1677	-7.59501e-13	-1.82456e-12
0.3678	-4.58784e-11	-7.21022e-12	1.52255e-11	5.70287e-12	0.1678	-7.60817e-13	-3.787e-12
0.3679	-4.50501e-11	-7.23434e-12	1.36377e-11	3.0162e-12	0.1679	-6.39527e-13	-4.28393e-12
0.368	-4.06819e-11	-9.33366e-12	1.30264e-11	2.16058e-12	0.168	1.80156e-12	5.90876e-13
0.3681	-4.01791e-11	-5.81774e-12	1.24151e-11	3.74637e-12	0.1681	9.47141e-13	5.10005e-12
0.3682	-4.35419e-11	4.6512e-13	1.0461e-11	3.62318e-12	0.1682	7.03407e-13	2.77382e-12
0.3683	-4.49516e-11	3.18918e-13	1.48546e-11	5.0869e-12	0.1683	-3.94565e-13	5.70136e-13
0.3684	-4.27806e-11	-3.20454e-12	1.87599e-11	8.99202e-12	0.1684	-1.98067e-12	-1.14483e-12
0.3685	-4.11793e-11	-7.37904e-12	1.77824e-11	1.57048e-11	0.1685	-1.85773e-12	-3.83596e-12
0.3686	-3.98627e-11	-9.64109e-12	1.65607e-11	1.64361e-11	0.1686	-1.97898e-12	-7.89442e-13
0.3687	-3.73255e-11	-8.93281e-12	1.22873e-11	1.50922e-11	0.1687	-8.79651e-13	5.48358e-13
0.3688	-3.76366e-11	-5.70171e-12	5.57252e-12	1.54573e-11	0.1688	-2.46808e-14	-9.21287e-13
0.3689	-3.96566e-11	-5.35962e-12	8.01299e-12	1.38692e-11	0.1689	-7.56944e-13	-3.00121e-12
0.369	-3.91132e-11	-4.16301e-12	1.20404e-11	3.00384e-12	0.169	-1.24545e-12	-3.37215e-12
0.3691	-3.86512e-11	-7.72716e-12	1.28939e-11	-5.05393e-12	0.1691	-5.13724e-13	-2.27833e-12
0.3692	-4.11595e-11	-8.52441e-12	1.14281e-11	8.04321e-13	0.1692	5.95475e-12	-2.52743e-12
0.3693	-4.24064e-11	-6.88021e-12	1.21596e-11	4.83152e-12	0.1693	6.56323e-12	-3.02082e-12
0.3694	-4.37755e-11	-6.04985e-12	2.6563e-11	5.44075e-12	0.1694	2.16613e-12	-2.90406e-12
0.3695	-4.53479e-11	-5.58568e-12	3.62056e-11	7.39275e-12	0.1695	-4.00663e-13	-2.9096e-12
0.3696	-4.1061e-11	-8.62085e-12	2.86363e-11	7.39162e-12	0.1696	-1.38135e-12	-2.4271e-12
0.3697	-4.05176e-11	-8.68566e-12	2.20435e-11	1.64237e-11	0.1697	-1.14217e-12	-2.79937e-12
0.3698	-4.3799e-11	-8.42494e-12	1.56949e-11	1.98405e-11	0.1698	7.26667e-14	-9.7468e-13
0.3699	-4.34998e-11	-6.98423e-12	1.61823e-11	1.77642e-11	0.1699	-1.39896e-12	1.2159e-12
0.37	-4.39736e-11	-9.00215e-12	1.3862e-11	1.54438e-11	0.17	7.90592e-13	2.18545e-12
0.3701	-4.61564e-11	-9.84007e-12	1.16638e-11	1.16585e-11	0.1701	2.12469e-12	-6.29568e-13
0.3702	-4.26426e-11	-9.53866e-12	1.30056e-11	4.45519e-12	0.1702	2.11504e-12	-1.24766e-12
0.3703	-4.21806e-11	-1.06207e-11	1.38591e-11	5.47822e-13	0.1703	1.37201e-12	-6.45366e-13
0.3704	-4.17185e-11	-9.79034e-12	1.55672e-11	3.02556e-13	0.1704	-9.58912e-13	-4.0956e-13
0.3705	-4.28027e-11	-1.09131e-11	1.55662e-11	4.23502e-13	0.1705	-9.71444e-13	1.9012e-12
0.3706	-4.55552e-11	-9.51303e-12	1.44667e-11	2.3755e-12	0.1706	-1.59524e-12	1.6483e-12
0.3707	-4.58662e-11	-9.61856e-12	1.42216e-11	3.22887e-12	0.1707	-2.342e-12	2.96636e-13
0.3708	-5.35422e-11	-1.12296e-11	1.45868e-11	1.7629e-12	0.1708	9.38729e-13	-1.54335e-12
0.3709	-5.56437e-11	-1.3573e-11	1.71494e-11	3.59284e-12	0.1709	2.02138e-12	-3.74953e-12
0.371	-5.19264e-11	-1.26206e-11	2.20312e-11	7.98624e-12	0.171	1.02807e-12	-3.63626e-12
0.3711	-5.05692e-11	-1.19936e-11	2.22744e-11	1.10369e-11	0.1711	1.62095e-12	1.71668e-14
0.3712	-5.01479e-11	-1.3035e-11	1.81231e-11	8.71641e-12	0.1712	1.72491e-12	2.20588e-12
0.3713	-5.10693e-11	-1.31812e-11	1.69015e-11	5.66353e-12	0.1713	1.34002e-12	2.44331e-13
0.3714	-4.959e-11	-1.18625e-11	1.53136e-11	2.0003e-12	0.1714	-1.43983e-13	-6.18398e-13
0.3715	-4.61983e-11	-1.32294e-11	1.51906e-11	3.09781e-12	0.1715	-2.11664e-12	-1.60202e-14
0.3716	-4.39866e-11	-1.45556e-11	1.90959e-11	3.70704e-12	0.1716	-1.28197e-12	-5.11931e-13
0.3717	-4.34432e-11	-1.37252e-11	1.72639e-11	3.82799e-12	0.1717	-4.47474e-13	-1.61774e-12
0.3718	-4.35915e-11	-1.31797e-11	1.34788e-11	7.24483e-12	0.1718	-1.4441e-12	-3.21132e-12
0.3719	-4.25597e-11	-1.53604e-11	1.45765e-11	7.73199e-12	0.1719	8.55236e-13	-2.36289e-12
0.372	-4.0348e-11	-1.67273e-11	1.23783e-11	3.82462e-12	0.172	-6.29418e-13	-2.0021e-12
0.3721	-3.7648e-11	-1.56935e-11	1.33539e-11	3.94556e-12	0.1721	-2.3579e-12	-3.71584e-12
0.3722	-3.53549e-11	-1.53107e-11	1.50619e-11	5.77549e-12	0.1722	-7.90066e-13	-2.98743e-12
0.3723	-3.51777e-11	-1.66776e-11	1.38403e-11	3.94331e-12	0.1723	4.58748e-14	-5.49272e-13
0.3724	-3.7035e-11	-1.49927e-11	1.65249e-11	6.38359e-12	0.1724	2.83556e-12	-1.04001e-12
0.3725	-3.57999e-11	-1.50168e-11	1.72563e-11	1.04108e-11	0.1725	3.18454e-12	-6.75448e-13
0.3726	-3.05771e-11	-1.36982e-11	2.16499e-11	9.67725e-12	0.1726	2.19158e-12	6.66446e-13
0.3727	-2.95861e-11	-1.4414e-11	2.15269e-11	4.4271e-12	0.1727	1.93198e-12	6.66379e-13
0.3728	-3.01006e-11	-1.50892e-11	1.95729e-11	-2.12698e-13	0.1728	1.42931e-12	5.67671e-14
0.3729	-3.42772e-11	-1.67002e-11	1.90836e-11	3.9653e-13	0.1729	3.17447e-13	-3.07871e-13
0.373	-3.51173e-11	-1.75788e-11	1.67633e-11	1.49404e-12	0.173	1.83396e-13	-3.055e-13
0.3731	-3.20104e-11	-1.84167e-11	1.4321e-11	2.71362e-12	0.1731	2.00383e-12	6.38795e-14
0.3732	-3.06125e-11	-1.92546e-11	1.37097e-11	3.32285e-12	0.1732	2.36087e-12	-5.42487e-13
0.3733	-3.36091e-11	-1.81394e-11	1.63943e-11	-4.62455e-13	0.1733	7.66312e-13	-1.02596e-12
0.3734	-3.57105e-11	-1.9018e-11	2.091e-11	-1.56221e-12	0.1734	8.82349e-13	-6.54084e-13
0.3735	-3.52078e-11	-2.01001e-11	2.29842e-11	-1.19713e-12	0.1735	1.97657e-12	-3.72541e-14
0.3736	-3.40133e-11	-2.11008e-11	2.16405e-11	1.97558e-12	0.1736	5.09009e-13	2.04523e-12
0.3737	-3.37954e-11	-2.01483e-11	1.90761e-11	7.22348e-12	0.1737	2.63856e-13	1.32087e-12
0.3738	-3.45541e-11	-1.98062e-11	1.78544e-11	1.32038e-11	0.1738	9.96994e-13	8.41422e-13
0.3739	-3.52721e-11	-2.23531e-11	1.90742e-11	1.56441e-11	0.1739	1.60984e-12	1.18611e-13
0.374	-3.22058e-11	-2.38421e-11	2.81064e-11	1.51547e-11	0.174	1.61413e-12	-2.67863e-12
0.3741	-3.12148e-11	-2.22793e-11	2.67627e-11	1.53977e-11	0.1741	2.59678e-12	-3.76614e-12
0.3742	-3.30315e-11	-2.02282e-11	2.15128e-11	1.83263e-11	0.1742	1.13982e-12	-3.51012e-12
0.3743	-3.60281e-11	-1.84213e-11	1.89483e-11	1.56396e-11	0.1743	1.02745e-12	-5.6782e-13
0.3744	-3.56474e-11	-1.93405e-11	1.55294e-11	1.14881e-11	0.1744	3.06577e-13	6.66214e-13
0.3745	-3.31916e-11	-2.14398e-11	1.8092e-11	1.08766e-11	0.1745	2.27312e-12	-2.96316e-13
0.3746	-3.37061e-11	-2.21557e-11	2.28518e-11	1.27065e-11	0.1746	1.80013e-12	-5.25716e-13
0.3747	-3.92662e-11	-2.14474e-11	2.12639e-11	1.30716e-11	0.1747	7.18608e-13	-3.88182e-13
0.3748	-3.99841e-11	-2.5215e-11	1.58919e-11	1.58781e-11	0.1748	9.8162e-13	-5.76015e-15
0.3749	-3.72028e-11	-3.17088e-11	1.10081e-11	1.28252e-11	0.1749	2.34496e-12	8.65723e-13
0.375	-3.59676e-11	-2.84778e-11	8.68783e-12	7.45301e-12	0.175	1.63475e-12	-2.65651e-12
0.3751	-3.46104e-11	-2.36191e-11	1.24711e-11	6.9636e-12	0.1751	1.65857e-12	-2.88197e-12
0.3752	-3.54504e-11	-2.29514e-11	1.46674e-11	4.399e-12	0.1752	8.29452e-13	-2.86239e-12
0.3753	-3.91388e-11	-2.51321e-11	1.50327e-11	5.37444e-12	0.1753	-1.09681e-12	-2.59776e-12
0.3754	-4.18506e-11	-2.55631e-11	1.52759e-11	7.81473e-12	0.1754	3.00931e-14	-2.94255e-12
0.3755	-4.11037e-11	-2.42445e-11	1.33218e-11	1.11095e-11	0.1755	1.89076e-12	-1.82154e-12
0.3756	-4.06824e-11	-2.52045e-11	1.14898e-11	1.24511e-11	0.1756	1.79955e-12	-1.06577e-12
0.3757	-3.72093e-11	-2.38044e-11	1.44185e-11	7.44514e-12	0.1757	4.88812e-13	-1.77381e-12
0.3758	-3.44279e-11	-2.3381e-11	1.38072e-11	3.04949e-12	0.1758	-8.84397e-14	-4.05641e-13
0.3759	-3.57969e-11	-2.26726e-11	1.18532e-11	7.56497e-12	0.1759	8.00128e-13	1.45184e-12
0.376	-3.65962e-11	-2.4894e-11	1.19743e-11	1.22025e-11	0.176	5.90959e-13	3.55444e-12
0.3761	-3.83722e-11	-2.53657e-11	1.08747e-11	1.29338e-11	0.1761	7.48821e-13	3.09452e-12
0.3762	-4.0555e-11	-2.49016e-11	1.38035e-11	1.25665e-11	0.1762	-1.65601e-12	3.16192e-13
0.3763	-4.45281e-11	-2.47222e-11	1.64881e-11	1.23212e-11	0.1763	-2.22907e-12	-3.07155e-12
0.3764	-4.67517e-11	-2.50312e-11	1.77078e-11	1.51277e-11	0.1764	1.28212e-13	-5.9701e-12
0.3765	-4.31565e-11	-2.83105e-11	1.80731e-11	1.90328e-11	0.1765	-3.21541e-13	-3.49669e-12
0.3766	-4.15958e-11	-3.01657e-11	1.96591e-11	1.81772e-11	0.1766	-5.26651e-13	-2.73141e-12
0.3767	-4.06048e-11	-2.81553e-11	1.50194e-11	1.09739e-11	0.1767	4.89359e-13	-1.47707e-12
0.3768	-4.00614e-11	-2.5738e-11	8.06049e-12	4.25895e-12	0.1768	-2.03267e-13	2.21715e-14
0.3769	-4.02911e-11	-2.58842e-11	1.14775e-11	-1.47947e-12	0.1769	2.15614e-12	-3.08968e-13
0.377	-4.06428e-11	-2.5949e-11	2.03877e-11	-5.9972e-12	0.177	1.09779e-12	9.2943e-14
0.3771	-4.01808e-11	-2.74786e-11	2.73448e-11	-3.06864e-12	0.1771	6.49915e-13	-2.37034e-13
0.3772	-3.94339e-11	-2.7991e-11	2.81983e-11	2.91168e-12	0.1772	8.12445e-13	-8.10684e-13
0.3773	-4.14133e-11	-2.6713e-11	2.01407e-11	9.86857e-12	0.1773	2.31771e-12	3.25032e-13
0.3774	-4.37589e-11	-2.55165e-11	1.51349e-11	1.38958e-11	0.1774	2.48009e-12	1.94935e-12
0.3775	-4.35816e-11	-2.64764e-11	1.64767e-11	1.26739e-11	0.1775	-2.97292e-12	-2.1026e-13
0.3776	-4.12072e-11	-2.71109e-11	1.80627e-11	1.01093e-11	0.1776	-4.64197e-12	-2.98001e-12
0.3777	-4.12741e-11	-2.96578e-11	1.13479e-11	9.742e-12	0.1777	-4.51932e-13	-1.59925e-12
0.3778	-4.08121e-11	-3.2042e-11	3.6062e-13	1.07174e-11	0.1778	5.63922e-13	-2.1837e-13
0.3779	-4.13266e-11	-3.01536e-11	7.07354e-12	1.21812e-11	0.1779	2.36555e-13	-3.02315e-13
0.378	-4.59915e-11	-2.91605e-11	1.26878e-11	-3.93324e-12	0.178	2.7484e-13	1.20061e-12
0.3781	-4.31694e-11	-3.17074e-11	1.41517e-11	-1.37e-11	0.1781	-1.75786e-13	-1.04198e-13
0.3782	-3.96556e-11	-3.35626e-11	1.56156e-11	-3.32514e-12	0.1782	7.15671e-13	-1.28716e-12
0.3783	-3.9804e-11	-3.1715e-11	1.90327e-11	8.39249e-12	0.1783	2.46086e-12	-2.59247e-12
0.3784	-4.23123e-11	-2.64086e-11	2.08628e-11	1.22976e-11	0.1784	7.87236e-13	-2.55538e-12
0.3785	-4.65703e-11	-2.84266e-11	1.82983e-11	1.22965e-11	0.1785	2.65271e-12	-2.88497e-12
0.3786	-4.97297e-11	-2.87762e-11	1.4147e-11	1.20512e-11	0.1786	1.58749e-12	-2.60475e-12
0.3787	-4.70297e-11	-2.77831e-11	1.31695e-11	8.51006e-12	0.1787	-1.55404e-12	-1.7148e-12
0.3788	-4.49807e-11	-2.71155e-11	1.09713e-11	7.53238e-12	0.1788	-3.02226e-13	-3.63316e-12
0.3789	-4.52511e-11	-2.81161e-11	1.2069e-11	6.67676e-12	0.1789	1.4366e-12	-2.86676e-12
0.379	-4.87767e-11	-3.08258e-11	1.0237e-11	7.40806e-12	0.179	2.56374e-12	-3.68814e-12
0.3791	-4.64022e-11	-3.0443e-11	5.96358e-12	1.52194e-11	0.1791	1.6143e-12	-1.58082e-12
0.3792	-4.19932e-11	-2.97754e-11	6.08471e-12	1.74156e-11	0.1792	-2.14419e-12	3.71326e-14
0.3793	-4.37692e-11	-2.91078e-11	3.52029e-12	1.4851e-11	0.1793	-1.63172e-12	1.89052e-13
0.3794	-4.39175e-11	-3.26312e-11	4.61798e-12	8.62426e-12	0.1794	-4.17259e-12	-2.58999e-12
0.3795	-4.24789e-11	-3.42423e-11	6.57016e-12	5.93759e-12	0.1795	-2.32058e-12	-3.05105e-12
0.3796	-4.397e-11	-3.28015e-11	4.61609e-12	1.0331e-11	0.1796	5.06247e-13	-3.39141e-12
0.3797	-4.75769e-11	-3.36801e-11	1.07511e-12	1.15506e-11	0.1797	4.01595e-13	-3.00076e-12
0.3798	-4.75625e-11	-3.21174e-11	-3.90683e-13	8.98598e-12	0.1798	-3.15271e-13	-2.48951e-12
0.3799	-4.5717e-11	-3.09615e-11	-2.71096e-12	7.39795e-12	0.1799	-1.8885e-12	-2.95637e-12
0.38	-4.31391e-11	-3.41594e-11	-4.7871e-12	8.98374e-12	0.18	-1.63261e-12	-1.22757e-12
0.3801	-4.36942e-11	-3.49159e-11	-2.71442e-13	8.49433e-12	0.1801	-5.24205e-13	-8.43218e-13
0.3802	-4.63246e-11	-3.46552e-11	9.38248e-14	6.17387e-12	0.1802	8.26356e-13	-2.77993e-12
0.3803	-4.62695e-11	-3.32552e-11	4.1212e-12	9.10243e-12	0.1803	9.54184e-13	-3.74189e-12
0.3804	-4.63772e-11	-3.08379e-11	3.63198e-12	9.10131e-12	0.1804	-2.21592e-12	-1.04355e-12
0.3805	-4.70137e-11	-3.06179e-11	3.26482e-12	4.58358e-12	0.1805	-2.21426e-12	-3.1078e-12
0.3806	-4.56158e-11	-3.25137e-11	6.80391e-12	5.55902e-12	0.1806	-1.11603e-12	-3.46493e-12
0.3807	-4.58455e-11	-3.81938e-11	7.65746e-12	5.43583e-12	0.1807	4.68446e-13	-1.38252e-12
0.3808	-4.53835e-11	-3.6631e-11	7.65652e-12	8.97475e-12	0.1808	2.17299e-12	8.76651e-14
0.3809	-4.76477e-11	-3.39695e-11	9.6087e-12	1.03164e-11	0.1809	-1.61763e-12	-1.98405e-12
0.381	-5.04001e-11	-3.32612e-11	1.07064e-11	3.35726e-12	0.181	-2.84674e-12	-1.61621e-12
0.3811	-5.19726e-11	-3.32039e-11	1.19261e-11	-1.839e-13	0.1811	-4.44405e-12	-1.1281e-12
0.3812	-5.09409e-11	-3.21294e-11	1.69301e-11	3.23294e-12	0.1812	-1.28258e-12	-1.98457e-12
0.3813	-4.81595e-11	-3.32522e-11	1.70512e-11	3.84217e-12	0.1813	-7.61483e-14	-1.25587e-12
0.3814	-4.59885e-11	-3.35611e-11	1.22895e-11	5.6721e-12	0.1814	-2.53369e-12	-1.26137e-12
0.3815	-4.83341e-11	-3.27714e-11	9.72511e-12	1.03097e-11	0.1815	-8.42675e-13	-2.73349e-12
0.3816	-4.73838e-11	-3.36094e-11	1.03345e-11	1.33603e-11	0.1816	1.14194e-13	-1.03358e-12
0.3817	-4.41955e-11	-3.40811e-11	1.19205e-11	1.38474e-11	0.1817	-1.61616e-12	-2.26517e-12
0.3818	-4.53204e-11	-3.54073e-11	1.49713e-11	1.09166e-11	0.1818	-4.18406e-13	-3.13231e-12
0.3819	-4.65266e-11	-3.60417e-11	1.28952e-11	6.39891e-12	0.1819	1.51028e-12	-1.31564e-12
0.382	-4.82212e-11	-3.62693e-11	8.25555e-12	5.78743e-12	0.182	1.85067e-12	-4.77201e-13
0.3821	-4.73522e-11	-3.44217e-11	5.56906e-12	5.66424e-12	0.1821	9.69102e-13	-7.39058e-13
0.3822	-4.81516e-11	-3.26961e-11	5.69018e-12	5.2969e-12	0.1822	1.06294e-12	-1.49081e-12
0.3823	-4.96427e-11	-3.25981e-11	6.78787e-12	5.41785e-12	0.1823	5.45377e-13	-2.36623e-12
0.3824	-4.89772e-11	-3.45347e-11	7.88556e-12	3.82981e-12	0.1824	-5.83475e-13	-2.38869e-12
0.3825	-4.76199e-11	-3.75699e-11	9.83774e-12	1.02107e-12	0.1825	9.72436e-13	-3.75541e-12
0.3826	-4.67103e-11	-3.60885e-11	1.08134e-11	3.33928e-12	0.1826	2.03937e-12	-2.1939e-12
0.3827	-4.66145e-11	-3.22063e-11	1.03241e-11	1.16389e-11	0.1827	1.27466e-12	-2.46486e-12
0.3828	-4.78614e-11	-3.14573e-11	6.78315e-12	1.35909e-11	0.1828	2.58463e-12	-2.85931e-12
0.3829	-4.91898e-11	-3.16442e-11	7.14842e-12	1.2247e-11	0.1829	-5.00326e-13	-1.05787e-12
0.383	-4.89719e-11	-3.28483e-11	1.17861e-11	1.21238e-11	0.183	-2.60897e-12	-9.66749e-13
0.3831	-4.93643e-11	-3.5029e-11	1.58135e-11	1.01696e-11	0.1831	-2.27636e-12	-1.97556e-12
0.3832	-4.81291e-11	-3.02517e-11	1.61788e-11	1.18775e-11	0.1832	3.75517e-13	-3.59593e-12
0.3833	-4.88064e-11	-2.72241e-11	1.28819e-11	1.21205e-11	0.1833	2.05086e-12	-1.92157e-12
0.3834	-4.98092e-11	-2.93641e-11	8.60854e-12	9.0676e-12	0.1834	3.08344e-13	-8.58676e-13
0.3835	-4.88996e-11	-3.23179e-11	6.89861e-12	8.21198e-12	0.1835	-3.35286e-13	-1.6279e-12
0.3836	-4.71355e-11	-3.50682e-11	1.23908e-11	7.11222e-12	0.1836	1.20027e-13	-3.2526e-12
0.3837	-4.44355e-11	-3.52551e-11	1.53196e-11	7.1111e-12	0.1837	3.31598e-13	-2.3147e-12
0.3838	-4.61707e-11	-3.52792e-11	1.71497e-11	7.35412e-12	0.1838	-6.67391e-14	-3.48523e-14
0.3839	-4.92487e-11	-3.50185e-11	1.83694e-11	9.55026e-12	0.1839	-2.17356e-12	-4.41286e-13
0.384	-5.24895e-11	-3.38626e-11	1.44623e-11	8.4505e-12	0.184	-1.71635e-12	-1.947e-12
0.3841	-5.27192e-11	-3.12419e-11	1.43392e-11	8.44938e-12	0.1841	2.06301e-13	-2.96505e-12
0.3842	-4.90833e-11	-3.15101e-11	1.75121e-11	1.07676e-11	0.1842	1.76337e-12	-4.43591e-13
0.3843	-4.81737e-11	-3.61322e-11	2.00747e-11	8.69127e-12	0.1843	2.46661e-12	-1.46264e-12
0.3844	-5.08447e-11	-3.96963e-11	2.09282e-11	1.00329e-11	0.1844	2.68222e-12	-2.84828e-12
0.3845	-5.1522e-11	-3.83777e-11	2.06831e-11	1.60132e-11	0.1845	2.4102e-12	-5.33287e-12
0.3846	-4.91069e-11	-3.5228e-11	1.50669e-11	1.5768e-11	0.1846	-6.68778e-13	-4.15562e-12
0.3847	-4.40062e-11	-3.46824e-11	1.11597e-11	1.17385e-11	0.1847	-1.18361e-12	3.49111e-12
0.3848	-4.41952e-11	-3.03934e-11	1.54313e-11	1.16153e-11	0.1848	-3.54952e-13	2.47064e-12
0.3849	-4.78835e-11	-2.97665e-11	2.15338e-11	9.66109e-12	0.1849	8.40672e-13	-5.03118e-13
0.385	-4.94967e-11	-3.11334e-11	2.43405e-11	1.18572e-11	0.185	9.38404e-13	-7.91401e-13
0.3851	-4.8465e-11	-2.98961e-11	2.48278e-11	1.52741e-11	0.1851	7.9271e-13	-4.69336e-13
0.3852	-4.85319e-11	-3.11409e-11	1.82351e-11	1.82026e-11	0.1852	-6.95069e-13	-2.34445e-12
0.3853	-4.82326e-11	-3.3403e-11	1.2741e-11	1.94222e-11	0.1853	-5.95241e-13	-2.63252e-12
0.3854	-4.96016e-11	-3.57464e-11	1.11531e-11	1.55148e-11	0.1854	9.70119e-13	-2.55414e-12
0.3855	-5.27203e-11	-3.78457e-11	1.01756e-11	1.16075e-11	0.1855	-7.59763e-13	-1.01061e-12
0.3856	-5.26652e-11	-3.92126e-11	1.5912e-11	8.18838e-12	0.1856	-1.69683e-13	-4.43289e-13
0.3857	-5.15521e-11	-3.6836e-11	1.42021e-11	4.281e-12	0.1857	-5.55599e-13	1.24457e-13
0.3858	-4.79569e-11	-3.39304e-11	1.09052e-11	3.18125e-12	0.1858	2.23282e-12	-1.01631e-12
0.3859	-4.57452e-11	-2.99262e-11	1.3834e-11	6.23188e-12	0.1859	5.75416e-12	-1.91238e-12
0.386	-4.58935e-11	-2.86483e-11	1.88379e-11	8.18388e-12	0.186	2.43996e-12	4.88095e-13
0.3861	-4.71812e-11	-3.01779e-11	3.50723e-11	8.30483e-12	0.1861	7.13039e-13	3.25793e-13
0.3862	-4.89571e-11	-3.44745e-11	3.43389e-11	8.91406e-12	0.1862	-3.70363e-14	-1.42262e-12
0.3863	-4.88206e-11	-3.55566e-11	2.48165e-11	1.73358e-11	0.1863	-1.27515e-12	-9.72895e-13
0.3864	-4.76668e-11	-3.35055e-11	1.93224e-11	2.90534e-11	0.1864	-5.59939e-13	-7.66371e-13
0.3865	-4.94834e-11	-3.45875e-11	1.77346e-11	2.49019e-11	0.1865	1.86443e-12	1.02809e-12
0.3866	-5.08524e-11	-3.50185e-11	1.99309e-11	1.73324e-11	0.1866	1.84751e-12	1.60271e-14
0.3867	-4.99835e-11	-4.078e-11	1.90754e-11	1.17161e-11	0.1867	-3.66559e-13	-1.48316e-12
0.3868	-4.78531e-11	-4.2391e-11	2.13938e-11	1.22032e-11	0.1868	-8.71554e-13	-2.24869e-12
0.3869	-4.67401e-11	-4.18048e-11	2.22474e-11	1.0371e-11	0.1869	-1.55799e-13	5.27122e-13
0.387	-5.07132e-11	-3.88992e-11	1.78519e-11	7.44022e-12	0.187	1.04828e-12	1.47325e-12
0.3871	-5.04139e-11	-3.67667e-11	1.40668e-11	6.2184e-12	0.1871	1.15379e-12	-2.06033e-14
0.3872	-4.8365e-11	-3.71164e-11	1.46762e-11	8.65868e-12	0.1872	3.86514e-14	-1.26881e-12
0.3873	-4.90016e-11	-3.50246e-11	1.66284e-11	9.14584e-12	0.1873	-2.21924e-13	-2.27126e-12
0.3874	-5.29341e-11	-3.41128e-11	1.49184e-11	1.1342e-11	0.1874	-1.82522e-12	3.90066e-13
0.3875	-5.80466e-11	-3.36894e-11	1.01568e-11	1.29278e-11	0.1875	8.44007e-13	3.67551e-13
0.3876	-5.71369e-11	-3.23707e-11	3.44194e-12	1.48798e-11	0.1876	1.19393e-12	1.02632e-13
0.3877	-5.59425e-11	-3.21914e-11	-1.56388e-12	1.51228e-11	0.1877	3.23208e-13	-3.84614e-14
0.3878	-5.32832e-11	-3.40465e-11	-1.6869e-12	1.20699e-11	0.1878	-3.03293e-13	-5.57054e-14
0.3879	-5.29839e-11	-3.88721e-11	-3.45066e-13	1.26791e-11	0.1879	-1.97298e-13	-3.15263e-13
0.388	-5.20336e-11	-3.99948e-11	2.33954e-12	1.73167e-11	0.188	3.08259e-12	-3.62475e-12
0.3881	-5.2426e-11	-3.93272e-11	3.43722e-12	2.21984e-11	0.1881	4.53149e-12	-2.6599e-12
0.3882	-5.21268e-11	-3.76423e-11	9.94875e-13	2.32959e-11	0.1882	-1.2306e-13	-1.20485e-12
0.3883	-5.18681e-11	-3.4045e-11	-3.48842e-13	1.96326e-11	0.1883	-1.48163e-12	-1.82302e-12
0.3884	-5.34406e-11	-3.11394e-11	-4.37811e-12	1.64577e-11	0.1884	5.7788e-13	-3.41576e-12
0.3885	-5.52166e-11	-3.06346e-11	1.6024e-12	1.57241e-11	0.1885	9.28578e-13	-3.6637e-12
0.3886	-5.32897e-11	-3.29373e-11	1.00243e-11	2.10941e-11	0.1886	1.40154e-12	-2.07851e-12
0.3887	-5.47807e-11	-3.32056e-11	9.41301e-12	1.77971e-11	0.1887	4.09843e-13	-1.83403e-12
0.3888	-5.84284e-11	-3.17242e-11	6.72652e-12	1.9505e-11	0.1888	-3.37489e-13	2.43579e-13
0.3889	-5.90243e-11	-3.32538e-11	2.45311e-12	1.85273e-11	0.1889	1.23474e-12	2.07911e-12
0.389	-5.73009e-11	-3.29931e-11	8.18947e-12	1.57185e-11	0.189	1.09826e-12	3.30636e-12
0.3891	-5.45602e-11	-3.18779e-11	1.417e-11	1.47408e-11	0.1891	1.07564e-13	1.85009e-12
0.3892	-5.16974e-11	-3.14138e-11	1.57559e-11	1.43735e-11	0.1892	3.37882e-13	2.7375e-13
0.3893	-4.92416e-11	-3.27806e-11	1.34357e-11	1.27855e-11	0.1893	1.42309e-12	1.75115e-12
0.3894	-4.89016e-11	-3.21944e-11	9.4064e-12	1.25402e-11	0.1894	-2.98804e-13	2.13184e-12
0.3895	-5.17762e-11	-2.97364e-11	6.96405e-12	1.26612e-11	0.1895	-1.77598e-12	2.39235e-12
0.3896	-5.49762e-11	-2.96792e-11	1.11135e-11	1.24159e-11	0.1896	-1.78764e-12	3.265e-12
0.3897	-5.67114e-11	-2.9744e-11	2.03899e-11	1.64431e-11	0.1897	-2.04269e-12	1.08764e-12
0.3898	-5.42556e-11	-3.14771e-11	1.50179e-11	2.02261e-11	0.1898	8.76888e-13	-2.18668e-12
0.3899	-5.59501e-11	-3.20709e-11	5.12922e-12	2.3643e-11	0.1899	3.30906e-12	-2.77378e-12
0.39	-5.8133e-11	-3.17287e-11	3.66343e-12	2.12005e-11	0.19	2.81247e-12	-6.73728e-13
0.3901	-6.22282e-11	-3.17529e-11	3.66249e-12	1.76593e-11	0.1901	1.46237e-12	-1.01358e-12
0.3902	-6.29869e-11	-3.10446e-11	7.32365e-12	1.42402e-11	0.1902	1.33402e-12	-1.96237e-12
0.3903	-6.01241e-11	-3.19232e-11	9.27583e-12	1.2408e-11	0.1903	-1.36008e-13	-1.32298e-12
0.3904	-5.75869e-11	-3.53652e-11	1.52563e-11	1.10641e-11	0.1904	4.7031e-13	-3.16242e-13
0.3905	-5.73283e-11	-3.70984e-11	1.78189e-11	1.25278e-11	0.1905	3.76336e-12	1.05772e-12
0.3906	-5.71511e-11	-3.60645e-11	1.67193e-11	1.8142e-11	0.1906	4.25001e-12	4.79452e-13
0.3907	-5.54276e-11	-3.25893e-11	1.28121e-11	2.20471e-11	0.1907	2.54066e-12	-3.42154e-13
0.3908	-5.40704e-11	-3.23693e-11	7.92834e-12	2.2046e-11	0.1908	2.90778e-12	-6.74777e-13
0.3909	-5.30387e-11	-3.1783e-11	8.29361e-12	1.99696e-11	0.1909	1.81133e-12	-2.10547e-12
0.391	-5.41229e-11	-3.29465e-11	1.46403e-11	1.64285e-11	0.191	7.16165e-13	-3.41366e-12
0.3911	-5.59802e-11	-3.28892e-11	1.53718e-11	1.42301e-11	0.1911	-6.21871e-13	-1.18146e-12
0.3912	-5.66575e-11	-3.20588e-11	1.85447e-11	1.63042e-11	0.1912	7.26914e-13	-7.80081e-13
0.3913	-5.51375e-11	-3.1676e-11	1.51258e-11	1.60589e-11	0.1913	1.46658e-12	-2.08759e-12
0.3914	-5.38616e-11	-3.28395e-11	1.46365e-11	1.55695e-11	0.1914	1.02036e-14	-1.68611e-12
0.3915	-5.20568e-11	-3.92519e-11	1.65887e-11	1.82539e-11	0.1915	6.30225e-13	-1.65097e-12
0.3916	-4.99265e-11	-4.36706e-11	1.36581e-11	1.5079e-11	0.1916	1.52814e-13	-1.86019e-12
0.3917	-4.77555e-11	-4.10091e-11	9.50676e-12	1.0195e-11	0.1917	1.99592e-12	-2.31387e-12
0.3918	-4.61134e-11	-4.01381e-11	9.74996e-12	1.09263e-11	0.1918	1.39879e-12	-1.18105e-12
0.3919	-4.34541e-11	-3.71104e-11	9.62694e-12	1.42211e-11	0.1919	-6.62049e-13	7.33068e-14
0.392	-4.19748e-11	-3.48152e-11	9.74807e-12	1.33655e-11	0.192	-1.13489e-12	-2.09091e-12
0.3921	-3.99666e-11	-3.79725e-11	1.45079e-11	1.26319e-11	0.1921	-1.41824e-13	-4.13376e-12
0.3922	-3.72666e-11	-3.88104e-11	1.59718e-11	1.22646e-11	0.1922	1.58469e-12	-3.85801e-12
0.3923	-3.43224e-11	-3.83869e-11	1.20646e-11	1.54373e-11	0.1923	1.60322e-12	-2.87199e-13
0.3924	-2.92624e-11	-3.58475e-11	8.03531e-12	1.61686e-11	0.1924	7.68233e-13	9.63382e-13
0.3925	-3.12825e-11	-3.38778e-11	6.81366e-12	1.14067e-11	0.1925	-3.09943e-13	1.72473e-12
0.3926	-3.50929e-11	-3.34951e-11	1.31604e-11	9.45249e-12	0.1926	1.99719e-13	-4.44593e-13
0.3927	-3.24336e-11	-3.59199e-11	1.73098e-11	7.2541e-12	0.1927	2.29721e-12	-5.39708e-13
0.3928	-3.00184e-11	-3.68799e-11	2.08489e-11	1.38448e-11	0.1928	2.68662e-12	-2.69614e-13
0.3929	-3.25267e-11	-3.8084e-11	1.82845e-11	1.9581e-11	0.1929	1.00168e-12	6.09851e-13
0.393	-3.93889e-11	-3.84743e-11	1.42552e-11	1.68943e-11	0.193	1.72057e-13	-4.61518e-12
0.3931	-3.98628e-11	-4.06143e-11	1.10805e-11	1.54283e-11	0.1931	-5.3471e-13	-6.78942e-12
0.3932	-3.60641e-11	-4.60095e-11	9.00432e-12	1.32299e-11	0.1932	-3.8622e-13	-2.73907e-12
0.3933	-3.03938e-11	-4.49757e-11	1.0102e-11	1.04212e-11	0.1933	-1.14914e-13	-1.25316e-12
0.3934	-2.79379e-11	-4.31688e-11	1.09556e-11	9.93178e-12	0.1934	8.89492e-13	-3.30824e-12
0.3935	-2.6011e-11	-4.22977e-11	1.03443e-11	1.26162e-11	0.1935	2.74901e-12	-2.67869e-12
0.3936	-2.45724e-11	-4.3868e-11	1.04654e-11	1.0784e-11	0.1936	3.99875e-12	-3.41067e-13
0.3937	-2.56159e-11	-4.19797e-11	1.35162e-11	6.02216e-12	0.1937	2.07519e-12	-7.95006e-14
0.3938	-2.63339e-11	-4.12714e-11	2.09615e-11	7.36381e-12	0.1938	1.25075e-12	9.13656e-13
0.3939	-2.7296e-11	-3.83658e-11	2.35241e-11	1.18793e-11	0.1939	9.15044e-13	-5.35349e-13
0.394	-2.77291e-11	-4.07093e-11	1.9739e-11	1.41975e-11	0.194	1.06805e-12	-3.20574e-12
0.3941	-2.95864e-11	-4.16693e-11	1.35124e-11	2.3962e-11	0.1941	-4.87568e-13	-1.36012e-12
0.3942	-3.05892e-11	-4.15306e-11	8.75074e-12	2.31064e-11	0.1942	-5.33877e-12	4.85044e-13
0.3943	-2.911e-11	-3.99271e-11	8.7498e-12	2.17625e-11	0.1943	-1.76685e-12	-9.66097e-13
0.3944	-2.76713e-11	-3.9463e-11	-6.50561e-13	2.26159e-11	0.1944	-2.69921e-13	-3.0279e-12
0.3945	-2.725e-11	-4.12368e-11	-3.70326e-12	1.9563e-11	0.1945	-6.03883e-13	-1.06161e-12
0.3946	-2.71542e-11	-4.18712e-11	3.86415e-12	1.51673e-11	0.1946	-1.30396e-12	-5.60339e-13
0.3947	-2.97439e-11	-4.06747e-11	1.02109e-11	-2.28986e-12	0.1947	-5.39122e-13	-3.5992e-12
0.3948	-2.98515e-11	-4.00071e-11	1.2041e-11	-5.46481e-12	0.1948	1.93469e-12	-2.73184e-12
0.3949	-2.9715e-11	-4.19436e-11	1.21621e-11	-1.55969e-12	0.1949	6.24274e-13	-3.99652e-13
0.395	-3.01074e-11	-3.9567e-11	1.20391e-11	1.49095e-12	0.195	7.78615e-13	-2.05634e-14
0.3951	-3.02557e-11	-3.81262e-11	1.32588e-11	4.90779e-12	0.1951	1.4211e-12	1.94546e-12
0.3952	-3.45138e-11	-4.05104e-11	1.37462e-11	1.02778e-11	0.1952	-2.55912e-13	1.83634e-12
0.3953	-3.41331e-11	-4.01683e-11	1.35011e-11	1.29622e-11	0.1953	3.86192e-13	-2.42315e-12
0.3954	-3.59904e-11	-4.1291e-11	9.83805e-12	1.83322e-11	0.1954	1.76045e-12	-2.166e-12
0.3955	-3.70746e-11	-3.96062e-11	6.90742e-12	2.1749e-11	0.1955	8.14995e-13	-3.73991e-12
0.3956	-3.55546e-11	-3.89792e-11	3.4885e-12	1.83299e-11	0.1956	1.13288e-13	-1.52967e-12
0.3957	-3.2407e-11	-3.94509e-11	4.21998e-12	1.3568e-11	0.1957	3.19533e-12	-4.18121e-13
0.3958	-2.67366e-11	-4.03702e-11	1.03226e-11	8.92825e-12	0.1958	5.78862e-12	-1.01562e-12
0.3959	-2.74546e-11	-3.98654e-11	1.00775e-11	9.4154e-12	0.1959	4.23098e-12	-3.56635e-12
0.396	-3.04106e-11	-3.68784e-11	6.65855e-12	1.44192e-11	0.196	-1.28135e-14	-1.96683e-12
0.3961	-3.35292e-11	-3.72688e-11	4.33827e-12	1.29532e-11	0.1961	-9.61421e-13	8.53199e-13
0.3962	-3.43693e-11	-3.55025e-11	1.04143e-12	1.08769e-11	0.1962	-2.01833e-13	-1.33186e-12
0.3963	-3.32969e-11	-3.25969e-11	6.74278e-13	1.00213e-11	0.1963	-2.00658e-12	-3.51716e-12
0.3964	-3.10445e-11	-3.54694e-11	7.95403e-13	9.04357e-12	0.1964	-3.81228e-12	-1.30823e-12
0.3965	-2.98093e-11	-3.83418e-11	4.21243e-12	9.04245e-12	0.1965	-8.58232e-13	2.89986e-13
0.3966	-3.27246e-11	-3.72266e-11	5.49377e-13	1.07503e-11	0.1966	-9.57036e-13	-2.01849e-12
0.3967	-3.29949e-11	-3.55824e-11	-7.38614e-12	1.07492e-11	0.1967	-9.34945e-13	-2.00813e-12
0.3968	-3.25329e-11	-3.59727e-11	-9.46228e-12	1.02598e-11	0.1968	1.4052e-12	-1.02176e-12
0.3969	-3.32102e-11	-3.6363e-11	-9.9515e-12	5.49792e-12	0.1969	-5.28457e-13	-5.24295e-13
0.397	-3.47827e-11	-3.85844e-11	-4.45928e-12	7.44991e-12	0.197	-5.10381e-13	-1.7365e-12
0.3971	-3.52972e-11	-3.96258e-11	-2.14089e-12	9.52399e-12	0.1971	2.38674e-13	-2.21703e-12
0.3972	-3.46724e-11	-3.90803e-11	-4.58324e-12	6.83732e-12	0.1972	-2.30966e-12	-9.89393e-13
0.3973	-3.41696e-11	-3.73547e-11	-8.49043e-12	1.02542e-11	0.1973	-2.54016e-12	-1.2275e-12
0.3974	-3.36262e-11	-3.53036e-11	-1.1299e-11	1.22062e-11	0.1974	-1.91769e-12	-2.199e-12
0.3975	-3.51987e-11	-3.26422e-11	-6.41713e-12	1.44023e-11	0.1975	-6.86404e-13	-2.56116e-12
0.3976	-3.70153e-11	-3.46194e-11	-1.53526e-12	1.63543e-11	0.1976	-1.28772e-12	-4.63334e-12
0.3977	-4.02561e-11	-3.83463e-11	-3.48933e-12	1.64753e-11	0.1977	6.24752e-14	-3.53277e-12
0.3978	-4.26423e-11	-3.95912e-11	-3.12406e-12	1.73286e-11	0.1978	1.04483e-12	-2.55542e-12
0.3979	-4.08375e-11	-3.83946e-11	-9.27739e-13	1.59847e-11	0.1979	5.60698e-13	-2.55589e-12
0.398	-3.90327e-11	-3.732e-11	-3.61423e-12	1.24436e-11	0.198	1.05152e-12	-1.33695e-12
0.3981	-4.12155e-11	-3.79952e-11	-3.98138e-12	1.15879e-11	0.1981	7.59063e-14	3.68904e-13
0.3982	-4.04686e-11	-3.81414e-11	1.68064e-13	9.02334e-12	0.1982	-5.35088e-13	-6.12211e-13
0.3983	-3.94369e-11	-3.85317e-11	4.50478e-14	1.14636e-11	0.1983	-2.93173e-13	-6.1827e-13
0.3984	-3.63707e-11	-3.92475e-11	1.63102e-12	1.45143e-11	0.1984	1.90032e-12	-7.47912e-13
0.3985	-3.481e-11	-3.93124e-11	-1.29961e-12	1.46352e-11	0.1985	1.86085e-13	-8.79105e-13
0.3986	-3.71963e-11	-3.59185e-11	-3.13161e-12	9.6292e-12	0.1986	-1.28545e-12	3.30897e-13
0.3987	-3.93791e-11	-3.46405e-11	-8.62572e-12	9.38394e-12	0.1987	-2.02593e-12	-4.1381e-13
0.3988	-3.98123e-11	-3.74316e-11	-1.2655e-11	8.28418e-12	0.1988	-2.15736e-12	-1.89252e-12
0.3989	-4.16289e-11	-3.84729e-11	-1.05807e-11	6.81821e-12	0.1989	1.51319e-13	-3.12868e-12
0.399	-4.17772e-11	-3.93516e-11	-1.08258e-11	2.54463e-12	0.199	1.23805e-12	-4.24434e-12
0.3991	-4.18034e-11	-4.16136e-11	-6.43223e-12	2.78764e-12	0.1991	3.70435e-13	-4.14092e-12
0.3992	-4.32131e-11	-4.17191e-11	-3.50349e-12	6.32656e-12	0.1992	1.08858e-12	-2.69635e-12
0.3993	-4.31987e-11	-4.07667e-11	-7.04447e-12	4.37231e-12	0.1993	3.40761e-13	-2.10791e-12
0.3994	-4.18008e-11	-4.0628e-11	-4.35986e-12	9.5322e-13	0.1994	-1.87298e-12	-1.8873e-12
0.3995	-4.42277e-11	-3.96756e-11	-4.84909e-12	-1.97759e-12	0.1995	-1.52425e-12	-2.1566e-12
0.3996	-4.29112e-11	-3.72583e-11	-5.58246e-12	-8.80084e-13	0.1996	-1.05438e-12	-3.03785e-12
0.3997	-4.08623e-11	-3.75265e-11	-7.17032e-12	7.90785e-12	0.1997	5.13244e-13	-3.06621e-12
[truncated: 28,002 more rows]
