# Supplementary material for: The functional organization of excitation and inhibition in the dendrites of mouse direction-selective ganglion cells
Source: eLife. 2020 Feb 25;9:e52949. doi: 10.7554/eLife.52949 (PMC7069718; doi:10.7554/eLife.52949)
Supplement: Figure 2—source data 1. [file elife-52949-fig2-data1.xlsx]

## Sheet: Figure 2A-E
Calcium Signals (∆F/F)						50% Rise Time (s)
Time	Blue ROI	Green ROI	Magenta ROI	Red ROI		Branch A	Branch B	Branch C	Branch D		Distance	50% Rise Time		Estimated Stimulus Speed (m/s): 6 cells
-6e-07	-0.148143	-0.210551	-0.183356	-0.0951979		0.0486398	0.0780441	0.209223	0.322996		0.000120693	0.24579		0.000581226
0.0314994	-0.102341	-0.217979	-0.162856	-0.0737973		0.015174	0.0465051	0.151092	0.232406		0.000122545	0.239104		0.000573723
0.0629994	-0.102981	-0.192575	-0.13902	-0.0762018		-1.3792e-06	0.068809	0.197708	0.427199		0.000121437	0.212136		0.000431444
0.0944994	-0.0520528	-0.16374	-0.13671	-0.0597015		0.0575794	0.0857345	0.212858	0.257759		0.00011814	0.21427		0.000498952
0.125999	-0.0152077	-0.104857	-0.122857	-0.0364111		0.0128482	0.199398	0.161325	0.330288		0.000123157	0.198419		0.000465484
0.157499	0.00615143	-0.00422883	-0.098187	-0.0155091							0.000114578	0.192502		0.000596944
0.188999	-0.00313356	0.0786658	-0.0320829	0.0189684							0.000111824	0.228026
0.220499	0.011952	0.116587	0.00766914	0.038887							0.000105481	0.210884
0.251999	0.0432169	0.18761	0.0221946	0.0723012							0.000107906	0.182102
0.283499	0.0416971	0.205406	0.0439434	0.101737							0.000109423	0.158989
0.314999	0.0466727	0.255606	0.0349302	0.109197							9.92348e-05	0.198112
0.346499	0.0330481	0.212451	0.0215114	0.119223							0.000105336	0.194253
0.377999	0.00650444	0.246142	0.0371207	0.122658							0.000106636	0.1815
0.409499	-0.00880916	0.241507	0.0567048	0.116031							9.61337e-05	0.219776
0.440999	0.00359876	0.203166	0.0402762	0.101147							9.88703e-05	0.208445
0.472499	0.000433839	0.147624	0.0464038	0.0990702							0.000101193	0.212839
0.503999	-0.0109256	0.133395	0.100724	0.0930336							0.000102	0.168468
0.535499	-0.0179716	0.144798	0.107434	0.058692							9.06726e-05	0.179154
0.566999	-0.0270077	0.144051	0.124799	0.0547026							9.83479e-05	0.150207
0.598499	-0.0188919	0.132746	0.122678	0.0441702							9.52468e-05	0.190183
0.629999	-0.000128744	0.139055	0.143891	0.0175212							8.37429e-05	0.166675
0.661499	0.0399031	0.151057	0.147956	0.0225294							7.66419e-05	0.129779
0.692999	0.0375737	0.146038	0.100615	0.0261589							8.03447e-05	0.196898
0.724499	0.0363382	0.160422	0.0436875	0.0266371							8.90445e-05	0.226512
0.755999	0.0444492	0.211242	0.000826286	0.0371164							7.35407e-05	0.188084
0.787499	0.0521524	0.243444	0.0260671	0.049926							7.67077e-05	0.187629
0.818999	0.0550083	0.211135	-0.020664	0.0298285							8.36616e-05	0.162521
0.850499	0.0652592	0.186868	-0.0635287	0.0335565							8.53646e-05	0.195344
0.881999	0.0910072	0.196262	-0.104812	0.0430362							7.04396e-05	0.161799
0.913499	0.0849838	0.179366	-0.102018	0.0453689							7.98439e-05	0.123145
0.944999	0.106114	0.182192	-0.122682	0.0204421							6.73384e-05	0.152716
0.976499	0.118128	0.194848	-0.127178	0.0173479							7.73001e-05	0.15708
1.008	0.111795	0.168346	-0.0822656	2.34401e-05							6.6009e-05	0.158192
1.0395	0.107933	0.118915	-0.0802134	-0.00560286							6.77808e-05	0.129824
1.071	0.119339	0.0700202	-0.0785524	-0.0459151							6.95526e-05	0.105592
1.1025	0.0941034	0.04255	-0.0311154	-0.0228953							5.7078e-05	0.111467
1.134	0.0742513	0.0259979	0.0252908	-0.0274843							6.64944e-05	0.118089
1.1655	0.0407319	0.00968782	0.0404589	-0.0214388							7.34129e-05	0.150103
1.197	0.0034806	-0.0166092	0.0436252	-0.00278352							5.48098e-05	0.11829
1.2285	0.0125431	-0.0484275	0.0526428	-0.00626588							6.20563e-05	0.130104
1.26	0.00892061	-0.058737	0.0933556	-0.000770144							6.77318e-05	0.159104
1.2915	0.0104374	-0.0436841	0.0767021	0.00213166							7.01345e-05	0.140752
1.323	-0.00838497	-0.0541374	0.0441629	0.00581986							7.39444e-05	0.120333
1.3545	-0.0585897	-0.0204142	0.0391952	0.0103813							5.3162e-05	0.10266
1.386	-0.0483328	0.0231068	0.0645222	0.0138636							5.49338e-05	0.12921
1.4175	-0.0359362	0.0248293	0.104822	0.00614773							5.67056e-05	0.150911
1.449	-0.0377185	0.0206411	0.0895087	0.000694476							5.84774e-05	0.112127
1.4805	-0.0583547	0.0314094	0.108983	0.0100056							6.4589e-05	0.0766684
1.512	-0.0526541	0.0572804	0.0834799	-0.00789099							7.04819e-05	0.143318
1.5435	-0.0518069	0.0838976	0.0650379	-0.0206577							4.68023e-05	0.139446
1.575	-0.0263626	0.0818032	0.0291515	-0.0280745							4.88711e-05	0.140559
1.6065	-0.0225871	0.0502473	-0.00740043	-0.019771							5.36045e-05	0.151924
1.638	-0.0216469	0.0623363	-0.00435344	-0.0384451							6.60071e-05	0.0811726
1.6695	-0.0568672	0.0290336	-0.0351996	-0.0402553							6.77789e-05	0.121096
1.701	-0.0670909	0.0192733	-0.00883809	-0.0290048							4.85126e-05	0.151957
1.7325	-0.0791744	-0.00410354	-0.00551625	0.0290351							4.67959e-05	0.1034
1.764	-0.0975498	-0.0211893	-0.0224009	0.0421365							5.00042e-05	0.12284
1.7955	-0.0951556	-0.0289437	-0.0178732	0.0579383							5.93623e-05	0.125288
1.827	-0.0726461	-0.0298151	-0.0434077	0.0636097							6.29059e-05	0.122973
1.8585	-0.0248587	-0.0339589	-0.0217204	0.065634							4.69459e-05	0.0946146
1.89	-0.0246476	-0.0223923	0.00682435	0.0593448							5.76134e-05	0.104637
1.9215	-0.0126011	-0.0125738	0.00837454	0.0494316							3.5442e-05	0.102612
1.953	-0.0136717	0.0201808	0.0299743	0.0520295							3.72138e-05	0.0813621
1.9845	-0.00290184	0.0477853	0.0609883	0.0644232							3.89856e-05	0.0859219
2.016	0.0279286	0.0405056	0.0727517	0.0349368							4.10545e-05	0.108439
2.0475	0.0529224	0.057478	0.0847221	0.030945							4.50758e-05	0.118527
2.079	0.0230515	0.0704378	0.0751543	0.0452397							4.84542e-05	0.047932
2.1105	-0.00955454	0.0888751	0.0374229	0.0242832							5.24586e-05	0.0689019
2.142	0.00424046	0.127905	-0.0097526	0.00790127							5.13882e-05	0.0844666
2.1735	0.0378581	0.142431	-0.00377066	0.00885861							5.316e-05	0.103113
2.205	0.0428506	0.128991	0.00100517	-0.00133719							4.18154e-05	0.0957183
2.2365	0.0290913	0.116957	0.0106114	-0.00133729							4.70144e-05	0.0949246
2.268	0.0353372	0.128367	0.000131084	-0.0123478							3.53821e-05	0.0708181
2.2995	0.0115625	0.0812398	0.0273096	-0.00849923							3.63269e-05	0.133256
2.331	-0.0106616	0.0493082	0.0050621	-0.0105408							3.80987e-05	0.117562
2.3625	-0.0243376	0.0107659	-0.0137722	-0.0293263							3.49975e-05	0.115391
2.394	-0.0352796	-0.0331624	-0.0451379	-0.0495159							3.94371e-05	0.0422903
2.4255	-0.00867747	-0.0572243	-0.0441753	-0.0661213							4.17234e-05	0.0691899
2.457	-0.000620524	-0.0677091	-0.0599348	-0.0643825							2.72502e-05	0.0406586
2.4885	0.00980334	-0.103181	-0.0418497	-0.0549237							3.01246e-05	0.0526518
2.52	0.0288894	-0.14159	-0.0572788	-0.0732201							3.48827e-05	0.0761103
2.5515	0.048107	-0.148271	-0.0325407	-0.0556421							3.83467e-05	0.0446817
2.583	0.0594943	-0.146334	-0.0475951	-0.0346628							2.70235e-05	0.0674285
2.6145	0.0339863	-0.165723	-0.0665387	-0.00978506							3.05671e-05	0.0242208
2.646	0.0142935	-0.19082	-0.0967296	-0.011547							3.47892e-05	0.0418829
2.6775	0.00397896	-0.146008	-0.098238	0.0134229							3.01503e-05	0.0659095
2.709	-0.000999786	-0.147598	-0.0883547	0.0150865							3.27813e-05	0.0297293
2.7405	-0.0171517	-0.115791	-0.103244	0.0224119							2.08212e-05	0.093279
2.772	0.0159463	-0.0954042	-0.0985381	0.0298866							2.52191e-05	0.0616237
2.8035	0.0139451	-0.0768001	-0.0349633	0.0348215							2.96802e-05	0.0510072
2.835	0.0614148	-0.0177448	-0.0231846	0.0349962							1.66862e-05	0.0607852
2.8665	0.134535	0.0212138	-0.00672455	0.0479252							2.04044e-05	0.0698053
2.898	0.227343	0.0864718	-0.00190455	0.0318031							2.18424e-05	0.0577709
2.9295	0.314872	0.154469	0.0330801	-0.0117067							1.2847e-05	0.058828
2.961	0.430516	0.232487	0.0273447	-0.0441135							1.8046e-05	0.0823368
2.9925	0.563203	0.278255	0.0614494	-0.0533121							2.34778e-05	0.0485951
3.024	0.641831	0.32905	0.0794876	-0.0619335							8.49341e-06	0.0686773
3.0555	0.729753	0.456323	0.16035	-0.038771							2.03767e-05	-1.53923e-06
3.087	0.811593	0.549429	0.242386	-0.0068815							1.11531e-05	0.00377501
3.1185	0.895174	0.650621	0.288168	0.0302045							3.58617e-12	0.0465583
3.15	0.959076	0.730363	0.332669	0.101609							0.000123317	0.220365
3.1815	1	0.811984	0.466198	0.217602
3.213	0.998897	0.863994	0.51261	0.33659
3.2445	0.950329	0.903374	0.615085	0.448967
3.276	0.935776	0.902655	0.701712	0.537041
3.3075	0.899702	0.935392	0.778409	0.63506
3.339	0.843176	0.918035	0.857433	0.729638
3.3705	0.782033	0.913332	0.867494	0.851524
3.402	0.736724	0.889128	0.905629	0.896655
3.4335	0.708579	0.897293	0.955923	0.95548
3.465	0.733886	0.898354	0.999999	1
3.4965	0.797004	0.831223	0.983574	0.99137
3.528	0.845601	0.873315	0.993554	0.982332
3.5595	0.842339	0.897609	0.970981	0.9593
3.591	0.886503	0.900676	0.904938	0.93321
3.6225	0.893372	0.872956	0.881613	0.882137
3.654	0.86945	0.876717	0.845749	0.817151
3.6855	0.929042	0.928638	0.858337	0.802913
3.717	0.973256	0.942609	0.842417	0.752783
3.7485	0.980943	0.983062	0.840368	0.745402
3.78	0.982667	0.967925	0.853755	0.746792
3.8115	0.978059	0.980446	0.845018	0.731026
3.843	0.957007	1	0.787275	0.720095
3.8745	0.917658	0.995308	0.813075	0.700406
3.906	0.876642	0.989133	0.782927	0.683434
3.9375	0.856826	0.996396	0.740496	0.675249
3.969	0.837807	0.953149	0.748052	0.664362
4.0005	0.78595	0.914333	0.729557	0.6541
4.032	0.773979	0.861911	0.737209	0.623672
4.0635	0.765615	0.83324	0.764314	0.643753
4.095	0.752085	0.738193	0.785371	0.642003
4.1265	0.73872	0.648655	0.743939	0.625907
4.158	0.691066	0.656219	0.729902	0.654946
4.1895	0.613649	0.625676	0.685377	0.647244
4.221	0.636844	0.558284	0.645186	0.650451
4.2525	0.652488	0.534131	0.673367	0.664867
4.284	0.645525	0.500188	0.679476	0.682623
4.3155	0.654297	0.494761	0.690349	0.692477
4.347	0.635922	0.476632	0.655918	0.658935
4.3785	0.642718	0.475246	0.671518	0.65122
4.41	0.614984	0.474307	0.615615	0.626759
4.4415	0.62281	0.529509	0.522173	0.5993
4.473	0.598748	0.548769	0.540127	0.559066
4.5045	0.570712	0.569841	0.51241	0.553222
4.536	0.544548	0.566999	0.49663	0.531983
4.5675	0.550086	0.57802	0.547063	0.495552
4.599	0.51836	0.619126	0.58297	0.472935
4.6305	0.496321	0.62588	0.608007	0.444249
4.662	0.529119	0.619008	0.666135	0.459656
4.6935	0.488182	0.589476	0.68126	0.454887
4.725	0.471683	0.532364	0.683309	0.437072
4.7565	0.468025	0.509815	0.658723	0.440166
4.788	0.494826	0.518675	0.660644	0.454823
4.8195	0.46961	0.523347	0.671388	0.450701
4.851	0.51812	0.517196	0.685028	0.460934
4.8825	0.561469	0.525891	0.694885	0.464535
4.914	0.516404	0.488058	0.678365	0.462261
4.9455	0.518783	0.490216	0.609761	0.43329
4.977	0.546781	0.460422	0.572605	0.41007
5.0085	0.598211	0.447507	0.554057	0.415385
5.04	0.571555	0.439554	0.48552	0.412907
5.0715	0.583477	0.426	0.428377	0.402302
5.103	0.520274	0.379458	0.422218	0.397562
5.1345	0.518779	0.365674	0.371143	0.416777
5.166	0.502162	0.344989	0.409061	0.37756
5.1975	0.538382	0.364842	0.431032	0.357096
5.229	0.551831	0.366448	0.408665	0.3672
5.2605	0.56703	0.287775	0.395943	0.351137
5.292	0.565623	0.245702	0.465451	0.361731
5.3235	0.548767	0.210179	0.417064	0.32071
5.355	0.530175	0.193326	0.412799	0.32996
5.3865	0.536573	0.195793	0.375203	0.334899
5.418	0.498384	0.187034	0.395825	0.333
5.4495	0.449372	0.194067	0.395033	0.317904
5.481	0.449672	0.21003	0.416269	0.329388
5.5125	0.452972	0.219628	0.416584	0.344231
5.544	0.394042	0.210155	0.407097	0.366611
5.5755	0.404312	0.26534	0.377445	0.351017
5.607	0.394064	0.245664	0.353595	0.353024
5.6385	0.385044	0.286296	0.288763	0.382164
5.67	0.342241	0.350089	0.272445	0.370277
5.7015	0.323501	0.352674	0.218277	0.377742
5.733	0.286239	0.329562	0.213646	0.360652
5.7645	0.29726	0.373001	0.213024	0.335806
5.796	0.308226	0.355261	0.21219	0.321851
5.8275	0.364827	0.373773	0.186621	0.31864
5.859	0.330807	0.36415	0.175414	0.311718
5.8905	0.300386	0.3404	0.143318	0.266596
5.922	0.300089	0.348378	0.177326	0.253819
5.9535	0.307311	0.384467	0.113332	0.241169
5.985	0.283157	0.398954	0.123931	0.263049

## Sheet: Figure 2F-I
	ROI 1											ROI 2											Line Profile (Average only)
	Trial 1		Trial 2		Trial 3		Trial 4		Average			Trial 1		Trial 2		Trial 3		Trial 4		Average			X (µm)	Y (∆F/F)
Time	PD	ND	PD	ND	PD	ND	PD	ND	PD	ND		PD	ND	PD	ND	PD	ND	PD	ND	PD	ND		-10.3003	0.088274
-1.41e-05	0.0538772	-0.305094	0.133905	0.287958	-0.34224	0.00213515	-0.423322	-0.33695	-0.144445	-0.0879878		0.170766	0.294884	0.0178383	-0.237087	-0.10745	-0.243605	0.347526	-0.073002	0.10717	-0.0647026		-10	0.085068
0.0711619	0.0277057	-0.290067	0.0515212	0.320327	-0.365942	0.00404399	-0.376201	-0.314726	-0.165729	-0.0701058		0.159025	0.269742	0.00641297	-0.286772	-0.0621273	-0.118414	0.346065	-0.0504868	0.112344	-0.0464826		-9.6997	0.0870584
0.142338	0.0608224	-0.31737	-0.00869272	0.270293	-0.401201	-0.0679433	-0.348043	-0.321632	-0.174279	-0.109163		0.159546	0.250368	-0.0675577	-0.206873	-0.0776715	-0.10161	0.281483	-0.0199249	0.0739499	-0.0195098		-9.3994	0.082679
0.213514	0.0349345	-0.304365	-0.00741903	0.238213	-0.37941	-0.0837179	-0.353379	-0.303883	-0.176318	-0.113438		0.104638	0.163216	-0.0198479	-0.192691	-0.0605174	-0.0585063	0.161953	0.106081	0.0465564	0.00452492		-9.0991	0.158801
0.28469	0.0837168	-0.320481	0.0232891	0.236048	-0.413401	-0.0564552	-0.300523	-0.324184	-0.151729	-0.116268		0.0863908	0.134054	-0.0235012	-0.164075	-0.0276785	-0.0356907	0.06194	0.08681	0.0242878	0.00527455		-8.7988	0.153801
0.355866	0.0502224	-0.278263	0.0293851	0.172407	-0.376813	-0.0588974	-0.251108	-0.286352	-0.137078	-0.112776		0.0385322	0.149763	-0.0497112	-0.119618	-0.0188059	-0.0596317	0.0361281	0.136872	0.0015358	0.0268461		-8.4985	0.160033
0.427042	0.000393118	-0.214418	0.0122314	0.10917	-0.274247	0.0159005	-0.143884	-0.239308	-0.101377	-0.082164		0.0172955	0.185769	-0.0943205	-0.182225	-0.059634	-0.0666604	-0.0332467	0.125321	-0.0424764	0.0155512		-8.1982	0.168726
0.498218	-0.057283	-0.106833	-0.018781	0.206489	-0.237502	-0.00211242	-0.11675	-0.255325	-0.107579	-0.0394455		-0.0567405	0.167513	-0.139331	-0.170245	-0.152434	-0.133665	-0.0848166	0.0924143	-0.10833	-0.0109958		-7.8979	0.172946
0.569394	-0.0294034	-0.0443374	0.0278162	0.181884	-0.126774	0.0705095	-0.178628	-0.255567	-0.0767474	-0.0118779		-0.0290429	0.147338	-0.116353	-0.105928	-0.148652	-0.014388	-0.136261	0.104705	-0.107577	0.032932		-7.5976	0.156351
0.64057	0.0217893	-0.097172	-0.0208364	0.197607	-0.0204394	0.0839242	-0.153585	-0.229956	-0.0432679	-0.0113991		-0.105888	0.194695	-0.114196	-0.0847315	-0.146439	-0.0308821	-0.142342	0.117784	-0.127216	0.0492165		-7.2973	0.14847
0.711746	-0.00103496	-0.0134836	-0.087817	0.125678	0.0386709	0.0390678	-0.104095	-0.15399	-0.038569	-0.000681978		-0.108475	0.181454	-0.0756677	-0.00877558	-0.110462	-0.0325865	-0.13348	0.0489769	-0.107021	0.0472671		-6.997	0.169921
0.782922	0.0376527	-0.0644447	-0.136637	0.119139	0.0549127	0.00649706	-0.128837	-0.158905	-0.0432273	-0.0244285		-0.140561	0.227164	-0.133682	0.00123124	-0.00720005	-0.0735577	-0.122474	0.0861929	-0.100979	0.0602577		-6.6967	0.188993
0.854098	0.0316646	-0.0130779	-0.158487	0.0897606	0.10403	0.0153165	-0.184363	-0.122783	-0.0517886	-0.00769605		-0.123659	0.281226	-0.112083	0.0344916	-0.0389092	-0.0207657	-0.153729	0.127952	-0.107095	0.105726		-6.3964	0.179062
0.925274	-0.0282182	0.0284061	-0.115102	0.152798	0.0884214	-0.0227427	-0.173819	-0.0576211	-0.0571794	0.0252101		-0.113867	0.314519	-0.1135	0.105312	-0.0203341	0.0396713	-0.14899	0.102668	-0.0991728	0.140542		-6.0961	0.177708
0.99645	-0.0108762	0.00810145	-0.0767819	0.0678403	0.0764445	-0.031507	-0.0759449	-0.0315127	-0.0217896	0.00323053		-0.143881	0.358606	-0.103244	0.0682184	-0.0276532	0.0806221	-0.07374	0.00140705	-0.0871295	0.127214		-5.7958	0.186099
1.06763	0	0.0645959	-0.0630105	0.0309198	0.0813454	-0.033023	0	0.00959873	0.00458374	0.0180228		-0.158736	0.317532	-0.0164585	0.070599	-0.0620451	0.00723645	0.00111733	-0.0620046	-0.0590306	0.0833407		-5.4955	0.186357
1.1388	-0.000350448	0.0247034	-0.0866759	0.0529699	0.0702293	-0.0497661	0.0711284	0.0297295	0.0135828	0.0144092		-0.102078	0.236506	-0.00335394	0.0705288	0.0405412	0	0.0799541	-0.11	0.00376577	0.0492587		-5.1952	0.195283
1.20998	-0.0237284	0.0168447	-0.0713992	0.0193941	0.0850585	0.0050412	0.0329855	0.03247	0.00572908	0.0184375		-0.0661862	0.151914	0.15727	0.0200667	0.103835	-0.0315001	0.125033	-0.0648892	0.079988	0.0188979		-4.89489	0.204828
1.28115	-0.00589823	0.029256	-0.0661383	0.00377739	0.0786413	0.0674021	0.0110336	0.0294782	0.00440959	0.0324784		-0.00286703	0.0561492	0.182022	-0.107856	0.151172	-0.0362992	0.172893	0	0.125805	-0.0220015		-4.59459	0.21121
1.35233	-0.0837029	0.0413302	-0.0945311	-0.0364483	0.000147294	0.0259752	0.0705176	0.062248	-0.0268923	0.0232763		0.0749053	-0.00659682	0.226265	-0.126569	0.186097	0.0497051	0.19203	0.00165178	0.169824	-0.0204521		-4.29429	0.224021
1.42351	-0.0657546	-0.0073702	-0.048702	-0.0831254	-0.0389663	-0.0536762	0.086437	0.0650679	-0.0167465	-0.019776		0.0745386	-0.0461824	0.2006	-0.0475422	0.104434	0.0637713	0.177328	0.0217018	0.139225	-0.00206287		-3.99399	0.242615
1.49468	-0.00141899	-0.0737127	0	-0.0640021	-0.0574074	-0.0383074	0.0704658	0.038475	0.00290987	-0.0343868		0.022853	-0.147489	0.17667	-0.124146	0.0434898	0.0809119	0.0668335	-0.00323232	0.0774617	-0.0484888		-3.69369	0.255322
1.56586	0.0823635	-0.0634004	0.0248153	-0.0694039	-0.0730691	0	0.0523439	0	0.0216134	-0.0332011		0	-0.111285	0.0855734	-0.112595	0.019871	0.0444266	-1.33972e-05	-0.0523199	0.0263577	-0.0579435		-3.39339	0.276326
1.63703	0.0754493	-0.0439271	0.067729	-0.0339636	-0.0911668	-0.0820067	-0.0505867	-0.032811	0.000356204	-0.0481771		0.0489991	-0.00690737	0.0138616	-0.143233	0	0.0125015	0	0.051614	0.0157152	-0.0215063		-3.09309	0.302112
1.70821	0.0589179	0.0150874	0.0712867	-0.0585737	-0.126598	-0.0138225	-0.0364594	-0.0575553	-0.00821313	-0.028716		0.0521908	-0.00778667	-0.0526201	-0.111079	-0.0360457	-0.0383069	-0.0604091	0.0440952	-0.024221	-0.0282694		-2.79279	0.335309
1.77939	0.115752	0	0.115898	0	-0.076115	0.0268106	-0.151431	-0.134558	0.0010261	-0.026937		-0.0194606	-0.0154744	-0.0606395	0	-0.0700452	-0.0890558	-0.0833516	0.0289129	-0.0583742	-0.0189043		-2.49249	0.373993
1.85056	0.0968895	-0.0585607	0.160538	0.0228089	0	0.0788279	-0.219141	-0.143377	0.00957147	-0.0250752		0.0308755	0	-0.0368791	0.0339637	-0.0206627	-0.038066	-0.0524591	0.0334169	-0.0197814	0.00732866		-2.19219	0.416692
1.92174	0.127175	-0.179091	0.084977	-0.00131854	0.0121715	0.0291248	-0.194654	-0.134262	0.00741741	-0.0713869		-0.0322434	0.0468793	0	0.0554282	-0.0343416	-0.121231	-0.0204145	-1.43955e-05	-0.0217499	-0.00473454		-1.89189	0.4615
1.99291	0.036335	-0.082979	0.13035	0.00155814	-0.00441245	0.0233292	-0.26399	-0.161836	-0.0254295	-0.0549818		0.0123853	0.0197973	-0.10772	0.0691371	-0.065633	-0.129222	-0.0265138	-0.0687215	-0.0468705	-0.0272522		-1.59159	0.502913
2.06409	0.0288764	-0.0987825	0.146328	0.0606329	0.0246491	0.0205252	-0.331831	-0.247409	-0.0329944	-0.0662584		0.0172229	0.0442294	-0.0897604	0.0782	-0.0662229	-0.209723	-0.0309089	-0.0948763	-0.0424173	-0.0455424		-1.29129	0.54284
2.13527	-0.0268093	0.0133285	0.164822	0.0711982	0.031336	0.0884553	-0.258061	-0.201293	-0.022178	-0.00707766		-0.0116209	0.0812926	-0.0941805	0.017103	-0.0888988	-0.231009	-0.0620211	-0.0827649	-0.0641803	-0.0538447		-0.990991	0.580895
2.20644	-0.0354136	0.00629097	0.279994	0.0535559	-0.0203153	0.091479	-0.230556	-0.222006	-0.00157289	-0.01767		-0.0224609	0.0455343	-0.0495257	0.0168757	-0.0519619	-0.224615	-0.113714	-0.0883132	-0.0594157	-0.0626297		-0.690691	0.612954
2.27762	0.0131428	0.00631055	0.250887	0.0541767	-0.0624587	0.00241763	-0.163419	-0.23058	0.00953799	-0.0419189		-0.101068	-0.0119795	-0.00150958	-0.0614377	-0.0413861	-0.225885	-0.0303166	-0.0972524	-0.0435702	-0.0991386		-0.39039	0.635602
2.34879	-0.00625761	0.0289372	0.282029	0.109288	-0.0593546	-0.00154245	-0.150308	-0.287801	0.0165274	-0.0377796		-0.053658	-0.0720685	0.0450315	-0.0216744	0.0117119	-0.268848	-0.0284609	-0.0432466	-0.00634385	-0.101459		-0.0900901	0.646766
2.41997	-0.0518728	0.0199303	0.191743	0.144095	-0.0666869	0.00238504	-0.091158	-0.268568	-0.00449354	-0.0255394		-0.086787	-0.116433	0.0007314	-0.0388173	0.0629219	-0.324683	0.00704007	-0.00734707	-0.00402342	-0.12182		0.21021	0.646185
2.49115	-0.100175	-0.0332783	0.197568	0.108103	-0.0834477	0.0240247	-0.108981	-0.264605	-0.0237588	-0.0414389		-0.0345996	-0.0926357	0.010921	-0.0976765	-0.0114659	-0.368485	0.0851194	-0.0479538	0.0124937	-0.151688		0.510511	0.633085
2.56232	-0.138292	0.00617259	0.24124	0.158002	-0.0736226	0.0159139	-0.096011	-0.19231	-0.0166715	-0.00305533		0.0278949	-0.0835943	-0.0698031	-0.161848	-0.0760884	-0.37127	0.146543	0.025801	0.0071365	-0.147728		0.810811	0.610207
2.6335	-0.157575	-0.00385844	0.253284	0.125571	-0.0584497	-0.0817063	-0.0633775	-0.148187	-0.00652955	-0.0270453		0.0722727	-0.0543158	-0.0435569	-0.172996	-0.0371582	-0.298296	0.0999732	-0.00240969	0.0228827	-0.132005		1.11111	0.575375
2.70467	-0.125937	-0.00651313	0.211963	0.12494	-0.03985	-0.0689297	-0.0704823	-0.124657	-0.00607664	-0.0187899		0.0500397	-0.0273906	-0.140901	-0.209717	-0.0746554	-0.330594	0.0981889	0.0452612	-0.0168321	-0.13061		1.41141	0.533843
2.77585	-0.0606864	-0.0530029	0.156427	0.125533	-0.0112754	-0.0779408	-0.0697734	-0.159445	0.00367292	-0.0412141		0.0187731	-0.0194535	-0.184247	-0.194518	-0.0448634	-0.319925	0.0566143	-0.016401	-0.0384307	-0.137574		1.71171	0.488749
2.84703	-0.0340006	0.0345976	0.162792	0.0918402	-0.0372547	-0.105541	-0.0824559	-0.132	0.00227028	-0.0277759		0.0211145	0.0792177	-0.192081	-0.186458	0.0161186	-0.236377	0.0702972	-0.0254384	-0.0211376	-0.0922639		2.01201	0.440484
2.9182	-0.0569308	0.0121559	0.104941	-0.0107337	-0.0994004	-0.162187	-0.140635	-0.0862909	-0.0480063	-0.0617638		0.0582708	0.0345036	-0.106717	-0.17408	0.00826629	-0.147894	0.0562675	-0.0168008	0.00402192	-0.0760678		2.31231	0.396658
2.98938	-0.0642037	0.0137183	0.0655927	-0.126895	-0.0886987	-0.135102	-0.132655	-0.122323	-0.0549912	-0.0926505		0.00476161	0.0814232	-0.0998662	-0.13561	0.0620034	-0.0963695	0.0257379	-0.0357833	-0.00184082	-0.046585		2.61261	0.358345
3.06055	-0.0604054	-0.032993	0.0580217	-0.0661555	-0.0646362	-0.115912	-0.135624	-0.0865045	-0.050661	-0.0753913		-0.0711612	0.0765122	-0.0121474	-0.0386449	0.16719	-0.116058	-0.0246509	-0.0593973	0.0148076	-0.0343971		2.91291	0.317498
3.13173	-0.121298	0.0275638	0.0488007	-0.0953726	-0.066365	-0.129911	-0.189022	-0.0708981	-0.081971	-0.0671545		-0.0899224	0.100251	0.0493735	-0.010047	0.272445	-0.0733594	-0.0401302	-0.0956559	0.0479414	-0.0197029		3.21321	0.284418
3.20291	-0.0943333	0.0794704	-0.0986603	-0.156065	-0.082293	-0.139883	-0.153223	-0.0949674	-0.107127	-0.0778613		-0.131085	0.0964379	0.105834	0.0591705	0.278533	-0.0679367	-0.056231	-0.110889	0.0492625	-0.00580429		3.51351	0.258764
3.27408	-0.110607	0.148539	-0.157591	-0.0205791	-0.181796	-0.0521025	-0.200375	-0.122047	-0.162592	-0.0115474		0.0167699	0.134808	0.0257072	0.109275	0.251267	-0.0850566	-0.100491	-0.148954	0.0483131	0.00251804		3.81381	0.239836
3.34526	-0.0900036	0.187133	-0.117588	0.119945	-0.105864	0.0101747	-0.196685	-0.101141	-0.127535	0.0540279		-0.0184664	0.18538	0.163057	0.107711	0.340891	-0.0522864	-0.155219	-0.116734	0.0825656	0.0310174		4.11411	0.224183
3.41643	-0.0895751	0.241675	0.0885175	0.223249	-0.163655	0.0785242	-0.0979097	-0.0344897	-0.0656557	0.12724		0.0263758	0.187261	0.315826	-0.00161156	0.302416	0.00555119	-0.188009	-0.0520987	0.114152	0.0347755		4.41441	0.207068
3.48761	-0.0410968	0.229565	0.25907	0.280002	-0.134141	0.0661545	-0.168195	-0.017216	-0.0210909	0.139627		0.0776419	0.188685	0.440004	-0.0432024	0.296585	0.0880382	-0.200633	0.026584	0.1534	0.0650261		4.71471	0.201311
3.55879	0.0220146	0.201042	0.375481	0.402442	0.00420007	0.119089	-0.0719092	0.0350899	0.0824467	0.189416		0.236634	0.189813	0.467207	-0.0620163	0.226367	0.0554564	-0.136554	0.0648006	0.198413	0.0620135		5.01502	0.202947
3.62996	0.138708	0.112154	0.529853	0.484351	0.180256	0.13702	0.0303578	0.0474238	0.219794	0.195237		0.460663	0.332444	0.573547	-0.103914	0.145083	0.0462268	-0.0158012	0.148827	0.290873	0.105896		5.31532	0.204663
3.70114	0.230795	0.0621674	0.590834	0.653989	0.278846	0.118597	0.194016	0.134194	0.323623	0.242237		0.537564	0.438984	0.684663	-0.0840233	0.101948	-0.00273189	0.135776	0.236176	0.364988	0.147101		5.61562	0.205895
3.77231	0.338509	-0.0121692	0.695506	0.730103	0.413531	0.0634405	0.224304	0.120912	0.417963	0.225572		0.716784	0.471372	0.748741	-0.00129873	0.1234	0.0344947	0.182603	0.254551	0.442882	0.18978		5.91592	0.190922
3.84349	0.486999	0.0236505	0.86141	0.827713	0.507301	0.136112	0.316121	0.142398	0.542958	0.282468		0.871155	0.538908	0.772274	0.0159777	0.241418	0.0143144	0.273322	0.344772	0.539542	0.228493		6.21622	0.177568
3.91467	0.551995	0.0351563	0.964298	0.790857	0.626487	0.176927	0.421885	0.0880003	0.641166	0.272735		1.06229	0.625247	0.787164	-0.0594011	0.321967	0.0483575	0.270408	0.360063	0.610458	0.243567		6.51652	0.146869
3.98584	0.665699	-0.0189138	1.08841	0.843742	0.649009	0.253956	0.487574	0.0466722	0.722672	0.281364		1.1858	0.69762	0.760037	-0.0841052	0.397121	-0.0388214	0.376565	0.363469	0.679882	0.234541		6.81682	0.143777
4.05702	0.847678	-0.0413549	1.12339	0.807992	0.694404	0.236636	0.519983	0.0131606	0.796363	0.254108		1.17309	0.703552	0.802051	-0.024878	0.471238	0.0339812	0.481059	0.303252	0.73186	0.253977		7.11712	0.139102
4.12819	0.927629	-0.0439075	1.15239	0.743857	0.638446	0.231977	0.515066	-0.00360419	0.808384	0.232081		1.25411	0.703322	0.853149	-0.0386821	0.482742	0.084156	0.561418	0.261904	0.787855	0.252675		7.41742	0.154874
4.19937	0.990688	-0.0856847	1.08395	0.789797	0.644961	0.191528	0.503799	0.0103778	0.805851	0.226504		1.28142	0.518046	0.831536	-0.0431529	0.572275	0.0359577	0.660233	0.223312	0.836366	0.183541		7.71772	0.160526
4.27055	0.981286	-0.104855	1.1345	0.887014	0.705992	0.168978	0.531945	-0.0638155	0.838431	0.22183		1.25076	0.62932	0.74206	-0.055978	0.685828	-0.0886088	0.656806	0.185322	0.833863	0.167514		8.01802	0.136627
4.34172	0.915683	-0.110318	1.11878	0.856493	0.632382	0.101217	0.537967	-0.0356521	0.801203	0.202935		1.13914	0.542866	0.605672	0.0622401	0.863987	-0.165897	0.692581	0.165456	0.825344	0.151166		8.31832	0.153483
4.4129	0.760527	-0.0430728	1.04878	0.688787	0.605932	0.0296949	0.441067	-0.0632904	0.714076	0.15303		1.02288	0.536522	0.576174	0.0613189	0.777061	-0.10666	0.729226	0.131673	0.776336	0.155713		8.61862	0.211597
4.48407	0.687122	-0.0483361	0.904923	0.704944	0.475786	0.0386317	0.434866	-0.0834755	0.625674	0.152941		0.939443	0.494532	0.459869	0.0571123	0.727527	-0.140456	0.690229	0.0947828	0.704267	0.126493		8.91892	0.180591
4.55525	0.559093	-0.0474314	0.906699	0.787056	0.330408	0.0682057	0.390421	-0.0462413	0.546655	0.190397		0.876776	0.491429	0.292092	0.143831	0.694263	-0.0944003	0.609988	0.0261306	0.61828	0.141748
4.62643	0.453165	0.00999172	0.898021	0.800317	0.387576	0.0503035	0.377059	-0.0593337	0.528955	0.20032		0.762703	0.410137	0.307674	0.143262	0.618451	-0.0392281	0.609241	0.0178468	0.574517	0.133005
4.6976	0.354135	0.0184251	1.03926	0.718912	0.273973	0.0843227	0.357078	-0.00894303	0.506112	0.203179		0.694969	0.288917	0.343952	0.0573316	0.532545	-0.0409116	0.624349	-0.0215483	0.548954	0.0709472
4.76878	0.336075	-0.00233216	0.999238	0.618772	0.357595	0.101202	0.307406	0.0484989	0.500079	0.191535		0.695792	0.294542	0.255453	0.052747	0.495	-0.0651808	0.612229	0.0105208	0.514619	0.0731572
4.83995	0.31061	0.00574842	0.925783	0.596614	0.42415	0.0890884	0.349341	0.0807307	0.502471	0.193046		0.708967	0.215945	0.235238	0.0101565	0.330739	-0.0646553	0.627792	-0.0191753	0.475684	0.0355676
4.91113	0.305638	-0.0181479	0.814847	0.483735	0.404515	0.0350351	0.356028	0.0634009	0.470257	0.141006		0.639542	0.318532	0.389795	0.0122213	0.268828	0.049909	0.77084	0.0811328	0.517252	0.115449
4.98231	0.264144	0.0364859	0.765858	0.420636	0.312053	0.0570255	0.464922	0.0145667	0.451744	0.132178		0.585263	0.281385	0.48684	0.0394139	0.219691	0.07759	0.791272	0.132259	0.520767	0.132662
5.05348	0.190502	-0.0218321	0.659162	0.289667	0.324138	0.061466	0.491076	-0.0650248	0.41622	0.0660691		0.62349	0.222018	0.539232	0.0323576	0.185644	0.108916	0.669282	0.202585	0.504412	0.141469
5.12466	0.197079	0.0312591	0.643136	0.25248	0.324637	0.203671	0.53395	-0.0825598	0.424701	0.101212		0.597385	0.305223	0.55188	-0.0615571	0.228452	0.151583	0.653718	0.246964	0.507859	0.160553
5.19583	0.169018	0.0428542	0.576556	0.147653	0.347149	0.296084	0.528165	-0.160531	0.405222	0.0815149		0.66352	0.338385	0.537582	-0.124089	0.179211	0.218072	0.568132	0.280341	0.487111	0.178177
5.26701	0.272652	-0.0122584	0.500848	0.202237	0.286645	0.324635	0.552249	-0.190125	0.403099	0.0811221		0.595138	0.365565	0.493821	-0.167853	0.211954	0.25125	0.536537	0.297824	0.459362	0.186697
5.33819	0.324636	0.00456211	0.371778	0.0813196	0.264607	0.325249	0.52622	-0.154514	0.37181	0.0641542		0.59196	0.356742	0.587795	-0.108811	0.187331	0.273959	0.543174	0.302903	0.477565	0.206198
5.40936	0.313292	-0.0269928	0.306142	0.0850017	0.235503	0.351839	0.526799	-0.154826	0.345434	0.0637556		0.671434	0.378682	0.616212	-0.0991081	0.260995	0.229662	0.539745	0.318635	0.522096	0.206968
5.48054	0.355681	-0.0249963	0.340466	0.199381	0.356572	0.326354	0.64859	-0.143318	0.425327	0.0893551		0.616778	0.350275	0.646296	-0.128788	0.356486	0.104035	0.476065	0.374793	0.523906	0.175079
5.55171	0.344329	-0.0557935	0.418857	0.078082	0.416545	0.271834	0.693821	-0.0977611	0.468388	0.0490903		0.512305	0.501281	0.642732	-0.169498	0.348184	0.0688977	0.376523	0.373169	0.469936	0.193462
5.62289	0.33242	-0.0998942	0.420547	-0.00496852	0.368139	0.150524	0.691571	-0.0861423	0.453169	-0.0101202		0.425681	0.436617	0.576149	-0.14655	0.302301	0.135093	0.425926	0.412632	0.432514	0.209448
5.69407	0.288498	-0.148398	0.385712	-0.0689718	0.429926	0.128962	0.726249	-0.100002	0.457596	-0.0471027		0.281478	0.381343	0.558381	-0.119136	0.198714	0.0926526	0.361704	0.405423	0.350069	0.190071
5.76524	0.303981	-0.201464	0.379978	0.00621096	0.390957	0.0490626	0.695933	-0.10814	0.442712	-0.0635827		0.270706	0.37787	0.530999	-0.0618018	0.283615	0.0716288	0.294093	0.370141	0.344853	0.18946
5.83642	0.243452	-0.237169	0.409481	0.0191108	0.39603	-0.0217453	0.753779	-0.0881737	0.450686	-0.0819944		0.264899	0.381457	0.556727	0.0313456	0.248047	0.0275595	0.270398	0.40873	0.335018	0.212273
5.90759	0.26137	-0.253799	0.382128	0.157382	0.410847	-0.0371743	0.676423	-0.127335	0.432692	-0.0652315		0.29424	0.328194	0.523986	-0.0419463	0.230039	-0.0136205	0.311365	0.42445	0.339907	0.174269
5.97877	0.186253	-0.281197	0.536374	0.198572	0.369536	-0.0100226	0.623614	-0.0736795	0.428944	-0.0415818		0.271266	0.261751	0.462402	-0.127784	0.26106	-0.0509266	0.297644	0.386786	0.323093	0.117457
6.04995	0.25326	-0.345747	0.431687	0.22305	0.413607	-0.0357652	0.59455	-0.0419255	0.423276	-0.0500969		0.25409	0.215454	0.411768	-0.11778	0.193714	-0.0758316	0.202185	0.337017	0.265439	0.0897149
6.12112	0.206631	-0.293826	0.404587	0.153977	0.302164	-0.117506	0.53452	-0.0446999	0.361975	-0.075514		0.180917	0.20437	0.36359	-0.13997	0.158389	-0.0676907	0.175345	0.28174	0.21956	0.0696124
6.1923	0.235342	-0.266103	0.428061	0.133207	0.268209	-0.0607757	0.453532	-0.0604825	0.346286	-0.0635386		0.128019	0.224	0.38465	-0.0908175	0.126495	-0.0744139	0.211551	0.23517	0.212679	0.0734845
6.26347	0.21105	-0.229046	0.559684	0.202055	0.239202	-0.0395523	0.427287	-0.0780295	0.359306	-0.0361431		0.138312	0.258265	0.310099	-0.138164	0.0159838	-0.116456	0.162313	0.193268	0.156677	0.0492281
6.33465	0.16631	-0.204122	0.54168	0.20627	0.250117	-0.0224303	0.372117	-0.0723159	0.332556	-0.0231497		0.126982	0.231497	0.309952	-0.141075	0.0553009	-0.0967622	0.136667	0.21479	0.157225	0.0521124
6.40583	0.164478	-0.110034	0.539346	0.239867	0.267211	0.0546385	0.301664	-0.0478138	0.318175	0.0341643		0.0779188	0.151478	0.246384	-0.0840218	0.139935	-0.10018	0.122248	0.179967	0.146622	0.0368107
6.477	0.152963	-0.0667106	0.522778	0.184058	0.197405	0.0858568	0.252953	-0.0792763	0.281525	0.0309819		0.133105	0.170157	0.177638	-0.0699311	0.124055	-0.0504284	0.0957521	0.155672	0.132638	0.0513673
6.54818	0.140649	-0.0312106	0.55116	0.257042	0.127653	0.0504877	0.209767	-0.05072	0.257307	0.0563997		0.0897948	0.251446	0.0718533	-0.0845965	0.0513344	-0.0379205	0.0506098	0.111857	0.0658981	0.0601966
6.61935	0.156681	0.00891921	0.51868	0.173001	0.102128	0.0628999	0.176639	0.00562509	0.238532	0.0626112		0.0862834	0.237332	0.166699	-0.0254707	0.0739306	-0.0335013	0.0597253	0.0426061	0.0966596	0.0552416
6.69053	0.0777248	0.0248947	0.473426	0.0818246	0.0649115	0.0290028	0.267473	-0.00466736	0.220884	0.0327637		0.0658696	0.293138	0.113349	-0.00717271	0.103569	-0.0340273	0.0152288	0.0748337	0.0745041	0.0816929
6.76171	0.126582	-0.0424807	0.492125	0.0763034	0.156048	0.0520427	0.379017	-0.00451002	0.288443	0.0203388		0.0182911	0.253334	0.217797	0.0107924	0.0357775	-0.00700276	-0.0161073	0.0918409	0.0639395	0.0872412
6.83288	0.0714294	-0.0205188	0.569012	0.0281727	0.0787635	0.00655673	0.39501	0.0201698	0.278554	0.00859509		0.00394268	0.284247	0.199094	-0.0231066	0.042774	0.078167	0.0900464	0.121404	0.0839644	0.115178
6.90406	0.0638372	-0.00773461	0.574991	0.0980148	0.0530163	-0.0358759	0.393374	-0.0213901	0.271305	0.00825356		0.000276434	0.260218	0.190034	0.0300888	0.00584002	0.079508	0.21266	0.16943	0.102203	0.134811
6.97523	0.0483537	-0.0154057	0.58329	-0.0323331	0.0586965	-0.0851278	0.439317	-0.0227275	0.282414	-0.0388985		-0.0565577	0.269761	0.234009	0.109658	0.00200829	-0.0297613	0.226596	0.208613	0.101514	0.139568
7.04641	0.0347696	-0.0289999	0.588574	-0.063774	0.0129486	-0.148673	0.367763	-0.0202779	0.251014	-0.0654313		0.0283049	0.323642	0.275044	0.147612	0.0543856	0.0223197	0.22027	0.172664	0.144501	0.166559
