# Supplementary material for: The functional organization of excitation and inhibition in the dendrites of mouse direction-selective ganglion cells
Source: eLife. 2020 Feb 25;9:e52949. doi: 10.7554/eLife.52949 (PMC7069718; doi:10.7554/eLife.52949)
Supplement: Figure 3—figure supplement 1—source data 1. [file elife-52949-fig3-figsupp1-data1.xlsx]

## Sheet: Figure 3 Supplemental Figure 1
Stimulus Driven Correlation Between ROIs (from Figure 6)								Correlation vs Cable Distance
	ROI 1 vs 2		ROI 1 vs 3		ROI 1 vs 4			Distance	Average	SEM
Lag (s)	Average	SEM	Average	SEM	Average	SEM		3.34242e-06	0.831232	0.0115278
-6.63475	-0.000806301	0.000903562	-0.000591758	0.00107085	-0.000778191	0.000847421		4.76782e-06	0.809951	0.0123363
-6.57388	-0.00169612	0.00168871	-0.00170348	0.00190883	-0.00122782	0.00149743		7.00885e-06	0.795434	0.0117122
-6.513	-0.00235125	0.00234087	-0.00257999	0.00269278	-0.00204098	0.00199625		8.99908e-06	0.797776	0.00977983
-6.45213	-0.00310172	0.00285319	-0.00385813	0.00321746	-0.00277682	0.00239978		1.10345e-05	0.791695	0.00875728
-6.39125	-0.00418772	0.00330303	-0.00497324	0.00356167	-0.00313262	0.00263038		1.31283e-05	0.779789	0.00909389
-6.33037	-0.00593688	0.0036542	-0.00648372	0.00360295	-0.00374166	0.00284781		1.4833e-05	0.793803	0.00662078
-6.2695	-0.00852446	0.00389987	-0.00833441	0.00363552	-0.00411311	0.00316059		1.70331e-05	0.774574	0.00766817
-6.20862	-0.0112549	0.0041453	-0.0106227	0.00371567	-0.00443661	0.00345659		1.90477e-05	0.787057	0.00677194
-6.14775	-0.0145897	0.0044741	-0.0134125	0.00390799	-0.00581704	0.00378182		2.0933e-05	0.794925	0.00680558
-6.08687	-0.0184571	0.00469043	-0.016507	0.00407669	-0.00774187	0.00418494		2.31065e-05	0.780726	0.0083152
-6.02599	-0.0226483	0.00497858	-0.0190483	0.00441864	-0.00950471	0.00464613		2.5121e-05	0.784438	0.00723362
-5.96512	-0.0268664	0.00522397	-0.0213633	0.00483031	-0.0115442	0.00516575		2.69175e-05	0.754309	0.00954995
-5.90424	-0.0305322	0.00544017	-0.0230841	0.00525532	-0.0136997	0.00558871		2.91252e-05	0.779934	0.00874331
-5.84337	-0.0336925	0.00576742	-0.0247125	0.00573089	-0.0160613	0.00614044		3.09662e-05	0.763263	0.0111903
-5.78249	-0.0370749	0.00617193	-0.0266436	0.00619074	-0.0186381	0.00665509		3.31428e-05	0.781844	0.00703215
-5.72161	-0.0404593	0.00664346	-0.0287229	0.00665395	-0.0209738	0.00721339		3.48527e-05	0.765311	0.0105157
-5.66074	-0.0436478	0.00717353	-0.0308363	0.00706339	-0.0233039	0.00766213		3.69665e-05	0.757846	0.00940015
-5.59986	-0.0469067	0.00781456	-0.0335226	0.00739887	-0.0262631	0.00799602		3.89696e-05	0.758022	0.0103025
-5.53899	-0.0499696	0.00852602	-0.0365715	0.00775782	-0.0302184	0.00825567		4.1055e-05	0.77466	0.0105444
-5.47811	-0.053103	0.0092451	-0.0405185	0.00805021	-0.0337245	0.00858789		4.27917e-05	0.75597	0.0108738
-5.41723	-0.0561315	0.00992195	-0.0447852	0.0083471	-0.0367852	0.00881384		4.50401e-05	0.75725	0.0138629
-5.35636	-0.0597888	0.010535	-0.0495531	0.00873198	-0.0392608	0.00917137		4.68153e-05	0.767264	0.0130274
-5.29548	-0.0639441	0.011048	-0.0545837	0.00925676	-0.0415796	0.00950278		4.91394e-05	0.756733	0.0112559
-5.23461	-0.0690292	0.0115061	-0.0609306	0.00983219	-0.0444063	0.00993389		5.10439e-05	0.755575	0.0105719
-5.17373	-0.0751146	0.0118283	-0.0678398	0.0103275	-0.0472838	0.0103711
-5.11285	-0.0820854	0.0121448	-0.0761279	0.0109037	-0.0511862	0.0107956
-5.05198	-0.0899411	0.0124372	-0.084788	0.0114163	-0.0555646	0.0112507
-4.9911	-0.0985345	0.0128362	-0.0937558	0.0117714	-0.0606603	0.0115923
-4.93023	-0.107571	0.0132296	-0.103198	0.0119255	-0.066707	0.0120636
-4.86935	-0.116304	0.0136808	-0.112389	0.0119137	-0.0723134	0.0125964
-4.80847	-0.12452	0.0141027	-0.121499	0.0118433	-0.0776252	0.0133391
-4.7476	-0.133574	0.0145579	-0.131691	0.0118728	-0.0839702	0.0141333
-4.68672	-0.143226	0.0151291	-0.142269	0.0118501	-0.0913092	0.0148752
-4.62585	-0.152576	0.0157943	-0.152933	0.0118139	-0.0997471	0.0156617
-4.56497	-0.161822	0.016502	-0.163775	0.0119038	-0.109174	0.0164523
-4.50409	-0.171474	0.0172926	-0.175185	0.0120895	-0.119049	0.0172109
-4.44322	-0.181805	0.0180343	-0.186952	0.0124511	-0.129804	0.0180336
-4.38234	-0.193176	0.0187562	-0.199049	0.0128678	-0.140519	0.0188781
-4.32147	-0.205283	0.0193945	-0.211499	0.0131819	-0.152143	0.0196734
-4.26059	-0.217983	0.0198741	-0.223539	0.0135076	-0.164082	0.0204228
-4.19971	-0.230602	0.0202189	-0.234477	0.0137096	-0.175187	0.0210597
-4.13884	-0.242876	0.0205744	-0.244082	0.0138704	-0.185055	0.0216026
-4.07796	-0.253911	0.0206566	-0.251576	0.0140216	-0.194229	0.0220325
-4.01709	-0.262825	0.0206107	-0.256923	0.0141035	-0.202173	0.0222758
-3.95621	-0.269659	0.0202936	-0.259858	0.0142374	-0.20873	0.0222667
-3.89533	-0.273944	0.0199987	-0.261035	0.0142777	-0.214018	0.0220014
-3.83446	-0.275441	0.0194561	-0.26036	0.0142653	-0.217733	0.0217004
-3.77358	-0.273876	0.0187562	-0.257227	0.0142688	-0.218293	0.0214851
-3.71271	-0.27024	0.0179729	-0.252851	0.0142367	-0.217175	0.0214439
-3.65183	-0.265171	0.0171113	-0.248074	0.0140074	-0.214743	0.0213826
-3.59095	-0.258299	0.0163051	-0.24272	0.0137539	-0.211441	0.0212499
-3.53008	-0.249717	0.0155893	-0.236888	0.0134935	-0.207476	0.0211458
-3.4692	-0.240676	0.0149057	-0.231272	0.0133773	-0.201987	0.0213987
-3.40833	-0.231481	0.0144724	-0.226367	0.0130863	-0.194533	0.0218285
-3.34745	-0.223584	0.0141259	-0.222498	0.0129456	-0.187138	0.0223133
-3.28657	-0.216289	0.0138204	-0.219824	0.0127577	-0.17975	0.0227408
-3.2257	-0.209615	0.0137405	-0.218487	0.012655	-0.173658	0.0232659
-3.16482	-0.20329	0.0139287	-0.217782	0.0127185	-0.168097	0.0236063
-3.10395	-0.197447	0.0142818	-0.217066	0.0128433	-0.162983	0.024014
-3.04307	-0.191217	0.0146603	-0.215817	0.0130511	-0.158111	0.0245462
-2.98219	-0.184519	0.0151909	-0.213706	0.0131801	-0.155317	0.0247488
-2.92132	-0.178343	0.0157575	-0.211104	0.0132566	-0.152752	0.0247666
-2.86044	-0.172796	0.0163254	-0.207474	0.0133551	-0.150691	0.0246766
-2.79957	-0.166741	0.0169375	-0.202835	0.0135184	-0.149017	0.024553
-2.73869	-0.160441	0.0174433	-0.197217	0.0137657	-0.148037	0.0243821
-2.67781	-0.15337	0.0179854	-0.190033	0.0142336	-0.146458	0.0244379
-2.61694	-0.146574	0.0185722	-0.182342	0.0148129	-0.144787	0.0245488
-2.55606	-0.139622	0.0190455	-0.174041	0.0153788	-0.142351	0.0246961
-2.49519	-0.132003	0.0195339	-0.164304	0.0158156	-0.139023	0.0248651
-2.43431	-0.123466	0.020165	-0.15284	0.0161976	-0.13371	0.0251447
-2.37343	-0.1146	0.0207686	-0.139825	0.0164522	-0.125833	0.0252175
-2.31256	-0.104478	0.0213973	-0.125456	0.0165663	-0.116052	0.0253223
-2.25168	-0.0938019	0.0220216	-0.109927	0.016683	-0.106317	0.0253132
-2.19081	-0.0819053	0.0226405	-0.0935415	0.0168336	-0.0957066	0.0255972
-2.12993	-0.0692815	0.0233226	-0.0772135	0.0172055	-0.0845704	0.0258415
-2.06905	-0.0565174	0.0240751	-0.060622	0.0180031	-0.0726314	0.0261477
-2.00818	-0.0424941	0.0247754	-0.0427754	0.0191094	-0.0592835	0.0265335
-1.9473	-0.027481	0.0255939	-0.0236923	0.0204829	-0.0451607	0.0270996
-1.88643	-0.0118234	0.0263807	-0.00383641	0.0220041	-0.0310921	0.0278696
-1.82555	0.00349016	0.0272619	0.0160748	0.0233251	-0.0161848	0.028773
-1.76467	0.0190035	0.0282286	0.0364269	0.0245626	-0.00104662	0.0296865
-1.7038	0.0353043	0.029102	0.0568749	0.0255062	0.0138022	0.0305986
-1.64292	0.0521904	0.0297567	0.0765605	0.0262131	0.0281149	0.0314793
-1.58205	0.0698974	0.0303566	0.0959506	0.0267861	0.0435266	0.0323966
-1.52117	0.0886542	0.0307388	0.114653	0.0272187	0.0602745	0.0331859
-1.46029	0.108231	0.0311706	0.133339	0.0275351	0.0782335	0.0334348
-1.39942	0.128757	0.0315929	0.15261	0.0280238	0.0974663	0.033343
-1.33854	0.150446	0.0317017	0.172877	0.0284078	0.11792	0.0328008
-1.27767	0.172941	0.031801	0.194181	0.0288333	0.140465	0.0318641
-1.21679	0.196616	0.0317799	0.216263	0.0291017	0.16348	0.030824
-1.15591	0.220803	0.0317487	0.239201	0.0292242	0.186659	0.0297739
-1.09504	0.245547	0.0316484	0.262814	0.0291626	0.210417	0.0288066
-1.03416	0.271037	0.0314615	0.286678	0.0289676	0.234934	0.0278672
-0.973285	0.296959	0.0310495	0.311647	0.0286387	0.260414	0.0270021
-0.912409	0.325194	0.0304133	0.338396	0.0282205	0.286122	0.0263646
-0.851533	0.354476	0.0297263	0.366316	0.0277619	0.31154	0.0260353
-0.790657	0.384988	0.0290746	0.396316	0.0273204	0.33772	0.0258594
-0.729781	0.416001	0.0285179	0.427928	0.0269275	0.363956	0.0257042
-0.668905	0.44821	0.0280056	0.461721	0.0264642	0.391146	0.0256988
-0.608029	0.481688	0.0274873	0.497554	0.0259898	0.418112	0.0259179
-0.547153	0.516395	0.0268704	0.5344	0.0255013	0.444294	0.0261604
-0.486277	0.552625	0.0260277	0.572022	0.0248534	0.472121	0.026455
-0.425401	0.588886	0.0249053	0.609177	0.0241218	0.499861	0.0267976
-0.364525	0.62393	0.0236729	0.645064	0.023243	0.525866	0.0270302
-0.303649	0.657225	0.0223401	0.678741	0.0220664	0.549568	0.0273437
-0.242773	0.687417	0.0209703	0.708667	0.0209464	0.570552	0.0274448
-0.181897	0.713872	0.0198363	0.734066	0.0197548	0.589111	0.0272699
-0.121021	0.734505	0.0190786	0.753158	0.0189505	0.60215	0.0273124
-0.0601451	0.748712	0.0188223	0.765269	0.0186511	0.609016	0.0273389
0.0007309	0.756283	0.0188896	0.770319	0.0188376	0.60883	0.027455
0.0616069	0.75078	0.0191419	0.761068	0.019566	0.597315	0.0274491
0.122483	0.7384	0.0197692	0.743741	0.0204849	0.58158	0.0275673
0.183359	0.718724	0.0204508	0.720032	0.021267	0.560295	0.0277024
0.244235	0.692606	0.0210225	0.689952	0.021604	0.534443	0.0277024
0.305111	0.660632	0.0215037	0.654656	0.0216434	0.505363	0.02767
0.365987	0.624854	0.0215971	0.615772	0.0214069	0.472808	0.0275186
0.426863	0.586159	0.0216835	0.57588	0.0209613	0.438597	0.0273995
0.487739	0.545798	0.0215465	0.534597	0.0203557	0.402163	0.027134
0.548615	0.504561	0.0214464	0.492245	0.0198044	0.36598	0.0269209
0.609491	0.464276	0.0212898	0.450129	0.01947	0.331572	0.0269529
0.670367	0.423874	0.0214507	0.408833	0.0193244	0.297782	0.0274815
0.731243	0.384861	0.0216558	0.36862	0.0193707	0.265954	0.0281675
0.792119	0.346606	0.0218766	0.330091	0.0195066	0.236074	0.0289262
0.852995	0.308772	0.022053	0.293853	0.0194508	0.209382	0.0295785
0.913871	0.272882	0.0218607	0.260724	0.0194338	0.185271	0.0301602
0.974747	0.238244	0.0217102	0.228486	0.0194585	0.161942	0.0307962
1.03562	0.206075	0.0214947	0.197425	0.0195378	0.139621	0.0312475
1.0965	0.176095	0.021415	0.167945	0.0198011	0.11915	0.03126
1.15737	0.147766	0.0216678	0.139428	0.0202575	0.101723	0.0308133
1.21825	0.120814	0.0222098	0.112026	0.0208376	0.0866808	0.0303805
1.27913	0.0951935	0.0227781	0.0864405	0.0215424	0.0727522	0.0300777
1.34	0.0720444	0.0233192	0.0610802	0.0219783	0.0604288	0.0299786
1.40088	0.0513645	0.0238126	0.0365329	0.022166	0.049748	0.0302961
1.46175	0.0331444	0.0241485	0.0138084	0.0220406	0.0396568	0.0307394
1.52263	0.0170186	0.024372	-0.00734646	0.0218227	0.0299114	0.0311359
1.58351	0.00278629	0.0242695	-0.0285224	0.0215281	0.0196014	0.0316393
1.64438	-0.0103662	0.0241176	-0.0485029	0.0211289	0.00956617	0.0321783
1.70526	-0.0223728	0.0239545	-0.0673061	0.0207691	-0.000471308	0.0324217
1.76613	-0.0346192	0.0237678	-0.0847192	0.0206139	-0.01185	0.0320374
1.82701	-0.0468021	0.023575	-0.100566	0.0207967	-0.0248967	0.0310761
1.88789	-0.0601869	0.0232764	-0.114765	0.0209951	-0.0402149	0.0297632
1.94876	-0.073531	0.0229528	-0.126793	0.0212857	-0.0563993	0.028116
2.00964	-0.0865214	0.0226665	-0.136784	0.0215613	-0.0738687	0.0263057
2.07051	-0.100142	0.0223771	-0.145793	0.021576	-0.0923772	0.0247087
2.13139	-0.113359	0.0219929	-0.153091	0.0215034	-0.111373	0.0232572
2.19227	-0.126524	0.0213768	-0.158657	0.0210633	-0.128836	0.022076
2.25314	-0.13881	0.0206559	-0.163513	0.0203726	-0.143842	0.0212408
2.31402	-0.150384	0.0198018	-0.167582	0.0194419	-0.156421	0.0205972
2.37489	-0.16038	0.0189646	-0.171566	0.0183179	-0.165885	0.0201692
2.43577	-0.168639	0.0182309	-0.176093	0.0171657	-0.172923	0.0198228
2.49665	-0.17566	0.0176877	-0.180508	0.0160736	-0.177124	0.0195846
2.55752	-0.182286	0.0172121	-0.184391	0.0153037	-0.179219	0.0190857
2.6184	-0.187898	0.0168437	-0.189159	0.0149016	-0.179465	0.0185205
2.67927	-0.193268	0.0164779	-0.194876	0.0148798	-0.178119	0.0177398
2.74015	-0.198739	0.0159961	-0.200333	0.0149842	-0.175757	0.0167703
2.80103	-0.204404	0.0156312	-0.205719	0.0151713	-0.173665	0.0159545
2.8619	-0.210314	0.0154351	-0.21101	0.0153382	-0.172471	0.0151037
2.92278	-0.216837	0.0154867	-0.215406	0.0154636	-0.173024	0.0143778
2.98365	-0.223736	0.0157416	-0.219525	0.0154809	-0.174086	0.0137425
3.04453	-0.230297	0.0160293	-0.222729	0.0153412	-0.176164	0.0133899
3.10541	-0.236962	0.016033	-0.225825	0.0150899	-0.179146	0.0132917
3.16628	-0.24315	0.0157195	-0.228337	0.0147819	-0.183119	0.0133474
3.22716	-0.248347	0.0153308	-0.230926	0.0144225	-0.187296	0.0136858
3.28803	-0.252816	0.0147752	-0.233546	0.0141134	-0.191015	0.014004
3.34891	-0.256416	0.0141176	-0.236404	0.0138185	-0.194805	0.0141417
3.40979	-0.259391	0.013508	-0.239355	0.0136161	-0.198187	0.0142341
3.47066	-0.262161	0.0128483	-0.243052	0.0134309	-0.202042	0.0141561
3.53154	-0.264033	0.0122126	-0.246896	0.0132475	-0.205201	0.0138657
3.59241	-0.265483	0.0116152	-0.250341	0.0129872	-0.207319	0.0135893
3.65329	-0.265901	0.0112336	-0.253925	0.0127176	-0.209201	0.0133943
3.71417	-0.264766	0.0109858	-0.257223	0.0124729	-0.210233	0.0132184
3.77504	-0.26271	0.0109556	-0.25881	0.012263	-0.20985	0.0131187
3.83592	-0.259696	0.0111248	-0.258237	0.0122462	-0.207683	0.0131215
3.89679	-0.254814	0.0113998	-0.255471	0.0123654	-0.204614	0.0131472
3.95767	-0.248155	0.0118932	-0.250182	0.0124275	-0.199955	0.0133471
4.01855	-0.239827	0.0123901	-0.242073	0.012484	-0.193626	0.013651
4.07942	-0.229828	0.0128994	-0.232393	0.0124957	-0.184785	0.013984
4.1403	-0.218834	0.013242	-0.220966	0.0124719	-0.175134	0.0143118
4.20117	-0.206583	0.0133888	-0.208123	0.0125262	-0.164084	0.0146797
4.26205	-0.193321	0.013451	-0.193567	0.0125514	-0.152272	0.0150025
4.32293	-0.179864	0.0132887	-0.179031	0.0123912	-0.139726	0.0152338
4.3838	-0.167146	0.013149	-0.164897	0.0122319	-0.127676	0.0153716
4.44468	-0.155451	0.01287	-0.150566	0.0120121	-0.116881	0.0153948
4.50555	-0.144369	0.0125899	-0.137005	0.0117741	-0.10683	0.0154289
4.56643	-0.134429	0.0121195	-0.124558	0.0114424	-0.0977726	0.0152911
4.62731	-0.125143	0.0116903	-0.113236	0.0110228	-0.0881454	0.0151671
4.68818	-0.116493	0.0112354	-0.102793	0.0104355	-0.0797498	0.0149091
4.74906	-0.108026	0.0107432	-0.0940565	0.00969111	-0.0727889	0.0144011
4.80993	-0.0999386	0.0103335	-0.0862876	0.00894808	-0.066393	0.0137907
4.87081	-0.0922848	0.00998454	-0.078756	0.00823654	-0.0601542	0.0132326
4.93169	-0.0843783	0.00974556	-0.0715204	0.00773406	-0.0537298	0.0128818
4.99256	-0.0762543	0.00966819	-0.0648218	0.0073357	-0.0485402	0.0126343
5.05344	-0.0682028	0.00974077	-0.0583703	0.00710356	-0.0432933	0.0123577
5.11431	-0.060346	0.00986896	-0.0523054	0.006946	-0.0379464	0.0122451
5.17519	-0.0533098	0.00992113	-0.0467859	0.00686459	-0.0322975	0.0122388
5.23607	-0.0470995	0.00976303	-0.041396	0.00681924	-0.027672	0.0122411
5.29694	-0.0413706	0.00946027	-0.0359367	0.00676751	-0.0233013	0.0121998
5.35782	-0.0365652	0.00916637	-0.0310984	0.00669287	-0.0191311	0.012053
5.41869	-0.0326491	0.00877745	-0.0271185	0.00652965	-0.015493	0.0117778
5.47957	-0.0297115	0.00849977	-0.0237961	0.00643938	-0.0130451	0.011346
5.54045	-0.0271369	0.00822856	-0.0202575	0.00628359	-0.0118021	0.0109266
5.60132	-0.0245451	0.0081205	-0.0172295	0.00598962	-0.0106308	0.010466
5.6622	-0.0225374	0.00800951	-0.0143102	0.00564387	-0.00929902	0.0100338
5.72307	-0.0203496	0.00792018	-0.0116818	0.00526715	-0.00734657	0.00966498
5.78395	-0.0179728	0.00775746	-0.00930877	0.00488448	-0.00552652	0.00918659
5.84483	-0.0155109	0.00748215	-0.00757131	0.00457184	-0.00386922	0.00883676
5.9057	-0.013005	0.00716601	-0.0059559	0.00432639	-0.00171024	0.00858429
5.96658	-0.0104049	0.00689963	-0.00426519	0.00416945	0.000297538	0.00815588
6.02745	-0.00779577	0.00662261	-0.00273305	0.00414865	0.0017952	0.00754211
6.08833	-0.00571317	0.00626948	-0.00157366	0.004246	0.00336028	0.00690957
6.14921	-0.00382713	0.00578021	-0.000295923	0.00425017	0.00472876	0.00617979
6.21008	-0.00228529	0.00525853	0.000685282	0.00411262	0.00644798	0.00554516
6.27096	-0.00133533	0.0047356	0.00133502	0.00387948	0.00744893	0.00496329
6.33183	-0.000573923	0.00420218	0.00169704	0.00367484	0.00745163	0.00450399
6.39271	-0.000174166	0.00359436	0.00196235	0.00331335	0.00732444	0.0040509
6.45359	0.000219721	0.00295458	0.00182144	0.00281866	0.00702847	0.00347103
6.51446	0.000358152	0.00223211	0.00139883	0.00221721	0.00626181	0.00281034
6.57534	0.000297999	0.00151889	0.00082023	0.00156841	0.00473061	0.00200654
6.63621	8.51007e-05	0.000772963	0.000479048	0.000798534	0.00229461	0.00110231
