# Supplementary material for: The functional organization of excitation and inhibition in the dendrites of mouse direction-selective ganglion cells
Source: eLife. 2020 Feb 25;9:e52949. doi: 10.7554/eLife.52949 (PMC7069718; doi:10.7554/eLife.52949)
Supplement: Figure 3—figure supplement 2—source data 1. [file elife-52949-fig3-figsupp2-data1.xlsx]

## Sheet: Figure 3S2A
	Spikes									Calcium (Whole Image)										Calcium (Single ROI, Averages only)										Tuning Curves
Time	0	45	90	135	180	225	270	315		Time	0	45	90	135	180	225	270	315		Time	0	45	90	135	180	225	270	315		Direction	Spike	Whole Image	Single ROI
0	-50.5023	-48.266	-41.0302	-40.1299	-47.6474	-45.8948	-41.0922	-41.0341		0.0015671	7.90983	6.6593	7.29558	6.8894	7.69444	7.20374	7.52891	6.55117		0.0015671	37.3309	37.1643	23.2961	31.1619	50.6715	41.0426	17.682	34.8182		0	37.5	22.8066	127.456
0.1	-50.5067	-48.2711	-41.0337	-40.1332	-47.6539	-45.8994	-41.0964	-41.0382		0.0443171	8.03297	6.91081	7.45873	7.04218	7.82104	7.40875	7.72618	6.80715		0.0443171	40.2134	41.1098	24.5357	34.6431	52.9659	44.2546	21.4636	36.6903		45	35	22.7067	119.696
0.2	7.40594	9.6396	7.1256	4.97833	7.20375	7.13449	9.49991	6.5097		0.0870671	8.44549	7.28663	8.02994	7.60324	8.27486	7.89418	7.92401	7.54538		0.0870671	42.9638	46.0316	25.9411	34.8434	57.4197	44.3235	25.5554	42.3398		90	33.5	18.901	97.7287
0.3	10.9274	7.06039	7.6221	4.26295	7.6723	8.22542	5.11037	4.56568		0.129817	9.2733	8.00826	8.67784	8.36333	8.88559	8.61135	8.83778	8.41496		0.129817	50.2898	49.7913	29.7647	39.7951	62.8425	50.0608	34.0523	47.9518		135	37.5	21.7691	105.852
0.4	2.8482	6.30575	7.50107	5.98174	6.29816	1.9882	6.81882	5.66649		0.172567	10.5737	8.9174	9.69354	9.2063	9.88788	9.70668	9.88772	9.5621		0.172567	59.2826	56.5887	35.5518	47.0939	70.58	56.8495	42.1245	55.9859		180	33	21.0947	123.754
0.5	6.36206	6.76265	2.4958	1.59364	7.9633	7.94953	5.46726	9.8064		0.215317	11.975	10.1779	10.7724	10.4501	11.3099	10.988	11.3221	11.1778		0.215317	69.2526	64.9681	44.4555	51.4206	74.5019	65.7279	55.095	65.5122		225	26.5	18.023	87.9835
0.6	6.81247	7.81944	5.42101	5.13527	4.12571	5.96396	4.11084	2.34599		0.258067	13.8197	11.9365	12.5211	11.9614	13.0688	12.3149	12.9789	13.0863		0.258067	80.3476	74.4995	56.0959	62.1825	83.0198	77.021	67.6335	74.2027		270	23.5	15.7101	96.7952
0.7	7.86443	6.42672	5.28589	7.4451	5.16266	6.41342	5.79873	10.1376		0.300817	15.907	13.595	14.3483	13.6774	14.9204	14.1147	14.7825	15.0153		0.300817	97.4056	85.1313	66.5164	73.3094	93.0003	85.1597	82.4782	88.3673		315	26.5	19.0364	102.62
0.8	7.68797	4.41931	3.31635	6.69681	8.01644	3.19621	1.98893	3.88363		0.343567	17.2643	14.9659	15.7888	14.8047	16.3382	15.3891	16.1846	16.5925		0.343567	106.225	94.7765	78.7626	83.6095	102.584	95.3199	91.9489	102.06		360	37.5	22.8066	127.456
0.9	5.06661	4.23803	1.34573	5.33596	5.36733	7.2957	5.49752	5.56341		0.386317	17.5573	15.3386	15.8564	15.0771	16.5095	15.4463	16.1549	16.8738		0.386317	109.024	94.8115	81.0736	84.0424	100.55	95.1088	95.956	100.482
1	5.4935	4.05078	9.74032	6.41301	5.76356	4.06417	6.55467	-0.0817971		0.429067	16.1277	14.0526	14.4757	13.659	15.1712	14.1023	14.8094	15.568		0.429067	108.045	87.2027	82.172	79.4362	92.4309	89.3099	93.789	93.8899		DSI	0.0946	0.056	0.041
1.1	2.86589	3.24865	2.26117	6.87499	3.10259	4.49243	3.33672	2.81663		0.471817	14.5769	12.6595	12.8467	12.3818	13.4648	12.6738	13.114	14.0135		0.471817	104.995	79.1474	75.3208	72.8983	81.3241	79.2544	86.522	84.6199		PD	83.448	69.8718	47.0851
1.2	5.72707	6.10193	4.54989	3.67505	4.09868	3.69613	1.95045	5.09625		0.514567	13.2272	11.6648	11.6828	11.2821	12.2055	11.4979	11.7462	12.8813		0.514567	96.8841	73.7432	72.0239	68.5777	77.4943	74.2493	80.378	80.4542
1.3	8.57924	6.50685	7.44174	1.08938	8.13589	5.33706	0.563887	0.0518938		0.557317	12.3845	11.0133	11.0574	10.556	11.4361	10.7865	10.8449	12.0391		0.557317	94.2889	70.6038	70.6032	66.5913	76.071	67.9459	73.8345	76.3416
1.4	1.05762	4.46925	4.22908	1.5564	-0.0342357	3.92363	1.00715	1.72312		0.600067	11.686	10.5947	10.5514	9.83072	10.8485	10.0869	10.0968	11.4642		0.600067	90.9478	68.2574	69.4083	67.1002	71.1574	65.3297	68.257	72.0414
1.5	5.13452	4.87288	2.8515	3.24151	4.00358	9.82854	6.32619	4.60979		0.642817	10.8901	10.1099	9.8423	9.29881	10.2525	9.47943	9.48065	10.9285		0.642817	87.9086	63.9036	68.7273	66.1907	64.9756	64.6853	64.5127	67.5286
1.6	4.93442	4.05547	2.69643	6.14296	3.15342	5.96545	3.70743	3.22262		0.685567	10.3232	9.68512	9.33263	8.81214	9.64293	9.00608	8.97005	10.3387		0.685567	84.681	61.3171	66.2714	64.0491	63.1677	62.2808	57.6229	64.2762
1.7	6.56425	3.84962	3.15261	4.7713	4.13329	2.11076	4.7527	6.10732		0.728317	9.61721	9.24593	8.76346	8.38044	9.00327	8.39495	8.61129	9.77823		0.728317	82.3556	57.2919	64.1256	59.8092	60.8288	59.4685	56.7289	61.2828
1.8	6.36287	5.47473	3.60992	2.79424	4.50173	1.9239	5.79706	3.50038		0.771067	9.15214	8.87147	8.53105	7.97572	8.44467	8.01743	8.08631	9.46808		0.771067	75.6474	56.7233	59.2701	56.5887	58.6139	56.0204	53.9954	60.3381
1.9	2.50577	2.83066	1.63019	5.09171	1.82215	4.17917	2.57318	4.55981		0.813817	8.58519	8.5675	8.2496	7.5608	7.81236	7.61578	7.80612	9.05736		0.813817	71.3778	56.0895	55.8116	55.3974	57.7245	55.1113	52.5735	58.3146
2	5.97659	3.2439	2.0971	0.680668	3.41869	1.55575	3.6268	2.57191		0.856567	7.95317	8.16064	7.90779	7.18375	7.37079	7.44947	7.20796	8.67016		0.856567	69.9739	50.9111	51.6802	51.8841	56.9745	53.4638	50.0184	58.7805
2.1	5.17653	3.66057	1.95798	2.98958	0.747607	3.21041	5.29175	4.25069		0.899317	7.58567	7.77268	7.4718	6.75647	6.76865	7.08388	6.9591	8.20738		0.899317	66.5147	48.8947	47.1244	49.7182	54.0811	54.4435	48.9406	57.4836
2.2	1.33447	1.64263	3.65376	3.46934	1.13546	4.25759	2.68961	4.71163		0.942067	7.2082	7.32626	6.95894	6.30253	6.4036	6.73075	6.59258	7.71497		0.942067	66.0804	48.2347	41.389	44.8586	53.2988	51.5009	47.5772	54.948
2.3	1.77435	0.244508	3.52301	3.95349	2.74812	2.87009	0.707599	1.5189		0.984817	6.80627	7.02329	6.44683	6.03768	6.16737	6.43687	6.19122	7.43362		0.984817	61.8251	46.6791	40.0464	39.0968	50.3847	48.2057	47.069	50.9986
2.4	0.391024	0.685258	-0.868951	3.22313	4.36481	-0.946361	0.564685	3.21683		1.02757	6.52609	6.62854	6.04738	5.65534	5.85125	5.93907	5.67339	7.02316		1.02757	59.9704	42.5144	39.0118	39.5337	48.8551	46.6171	44.3792	50.0809
2.5	1.45712	1.13268	2.68184	-2.98705	2.32796	1.96001	2.86755	0.650148		1.07032	6.36868	6.01012	5.54897	5.37416	5.48096	5.83688	5.16871	6.42746		1.07032	58.5724	39.8775	35.5932	39.6361	45.9023	42.7051	45.1354	50.8862
2.6	1.31	2.80687	2.57499	4.23639	2.74325	1.21083	0.904655	2.97407		1.11307	6.1109	5.60787	5.20538	5.16342	5.27564	5.49283	5.01241	6.11876		1.11307	55.1251	38.1248	37.0641	40.1967	43.1935	40.1869	45.3794	49.7534
2.7	1.17216	2.04746	1.86696	-1.3519	3.77745	4.74062	2.00194	2.25263		1.15582	6.00604	5.27022	4.66661	4.957	5.06809	5.24837	4.68592	5.72303		1.15582	54.6848	35.1492	34.6232	37.7854	41.6732	37.688	48.6774	44.1741
2.8	2.26361	3.12795	3.608	5.88332	6.64959	2.7854	3.71468	2.76047		1.19857	5.74602	4.91554	4.29714	4.89969	4.90486	5.10814	4.56329	5.38286		1.19857	54.8497	32.6247	35.7834	36.3837	38.3857	34.2411	48.058	42.4248
2.9	-0.905444	4.21591	-1.35248	2.74654	4.64943	2.67345	2.38355	3.88567		1.24132	5.49535	4.51871	3.94297	4.74352	4.61564	4.97224	4.09479	5.07769		1.24132	54.3739	34.0325	32.5061	35.7514	40.7585	33.6437	47.7127	38.4178
3	3.86873	-2.61505	4.68172	-0.985403	0.83586	-1.08628	4.72216	1.35905		1.28407	5.07649	4.0938	3.60647	4.36532	4.4847	4.74219	3.77627	4.71162		1.28407	48.2106	32.9098	29.4899	34.3873	38.461	34.2933	46.1518	34.447
3.1	0.107559	6.43118	2.17705	5.05453	2.52988	0.0501979	-0.251913	-1.15347		1.32682	4.83054	3.68394	3.3577	4.10766	4.41196	4.58231	3.49506	4.30402		1.32682	45.9379	35.1932	26.9099	37.5879	36.1803	33.4995	43.8083	27.6504
3.2	4.29136	2.05546	0.906453	3.16439	-0.644893	3.63427	-0.938872	2.4456		1.36957	4.41546	3.33743	2.92408	3.80416	4.157	4.48331	3.36913	4.20623		1.36957	43.6661	33.8908	25.4106	38.0312	32.7357	34.609	41.5973	24.2441
3.3	4.20949	4.40615	-0.352046	0.0672115	2.90665	-0.0948313	2.04313	1.77844		1.41232	4.17683	3.19397	2.69211	3.78815	3.97629	4.33627	3.35051	3.96036		1.41232	40.9254	32.8751	24.7868	37.2201	34.2579	33.8948	39.7789	19.6324
3.4	0.480197	0.0555051	2.66963	-0.576133	-0.852891	0.462518	0.760163	1.7314		1.45507	3.80237	3.12817	2.62698	3.68458	3.64805	4.14038	3.29341	3.72797		1.45507	37.6161	33.3751	23.782	33.8558	34.1082	32.952	38.6976	18.9653
3.5	-2.01141	-1.83707	0.816625	-0.599795	-0.933547	1.63926	1.31815	-2.57482		1.49782	3.32303	2.87627	2.65231	3.5405	3.33695	4.01712	3.18898	3.68224		1.49782	32.7848	31.8759	21.7188	31.8583	30.9124	30.8794	39.3818	19.1465
3.6	1.60999	0.552558	0.195797	0.604525	0.827994	4.0437	-1.77438	4.11165		1.54057	3.23932	2.78558	2.74328	3.37729	3.1292	3.9646	3.12207	3.5042		1.54057	28.1699	31.7169	19.0068	32.7033	28.6632	32.3573	35.3495	17.2817
3.7	2.1857	1.72785	-0.415164	-0.0146894	2.59852	0.356155	1.2455	1.03728		1.58332	3.01684	2.72809	2.81182	3.13087	2.82232	3.73312	3.04171	3.37969		1.58332	26.4669	28.3724	17.6114	27.2485	26.304	29.4625	32.4436	18.6807
3.8	0.331069	2.30061	2.6418	-0.0152225	3.15816	0.344238	1.82885	3.46462		1.62607	2.79627	2.66252	2.78652	2.89756	2.70259	3.6843	2.76779	3.20948		1.62607	28.1049	24.7855	15.803	21.7585	23.6012	29.7872	32.0155	20.8683
3.9	-0.9008	1.66178	6.31021	1.82082	-2.97873	1.56119	1.80934	-1.4224		1.66882	2.77397	2.67228	2.71126	2.68444	2.52804	3.32109	2.70389	2.97094		1.66882	28.6713	24.9253	15.6318	17.0795	20.718	28.3189	29.3311	20.8046
4	2.75651	3.47167	-0.996911	-2.43736	0.0541096	1.56503	1.7975	-2.02465		1.71157	2.71798	2.53335	2.64624	2.49512	2.54231	3.12393	2.67965	2.83021		1.71157	32.344	22.6658	14.069	13.3925	18.1196	27.0979	26.89	18.7351
4.1	-2.12169	-1.42132	0.863275	1.24604	5.53076	-0.252263	-0.646123	-0.180602		1.75432	2.76368	2.47863	2.61868	2.32751	2.40485	2.81225	2.46339	2.79579		1.75432	29.3444	20.419	14.9248	10.8871	17.6753	24.9952	23.7154	18.0917
4.2	1.55374	0.40989	-1.54254	-2.99865	1.25089	0.990173	1.19003	2.27497		1.79707	2.80287	2.39448	2.48913	2.00383	2.22702	2.47166	2.2435	2.66917		1.79707	31.0072	17.2109	15.5727	8.99703	17.1959	22.7611	18.4128	21.811
4.3	-2.69804	1.02456	-2.10911	1.30691	1.25735	2.84643	0.589694	-1.97679		1.83982	2.84822	2.42452	2.44242	1.91316	2.15442	2.15232	2.24512	2.3976		1.83982	29.0705	14.066	16.3242	5.61432	15.025	21.0465	17.9686	23.4505
4.4	2.82053	4.6926	0.988429	1.34049	3.10189	-0.173201	-0.613653	-0.728354		1.88257	2.52959	2.53239	2.24216	1.71096	2.04182	1.78115	2.23753	2.22209		1.88257	27.5559	12.3624	18.1981	3.69533	13.8734	18.9614	18.642	24.8994
4.5	4.06506	-0.177871	-0.794385	3.81711	0.682664	2.30582	1.23905	-0.69862		1.92532	2.36638	2.52411	1.99381	1.50783	1.88052	1.59352	2.07546	1.94691		1.92532	28.0608	10.3746	18.6918	1.23921	13.7483	20.3842	18.1307	23.3771
4.6	2.26262	0.453556	0.478074	-2.24427	0.104692	-2.53288	0.653305	4.21151		1.96807	2.07584	2.43236	1.79207	1.4528	1.91283	1.44372	1.90604	1.85282		1.96807	27.7234	8.45128	19.482	-1.3464	12.2243	20.2555	15.2181	23.1677
4.7	2.90604	1.69724	0.53074	-1.58387	0.143946	1.78746	-1.75697	-0.0325755		2.01082	1.95103	2.20087	1.60858	1.42101	1.77923	1.32065	1.73939	1.66036		2.01082	27.2798	9.12863	16.6118	-0.768865	12.5148	22.1491	15.0154	18.0726
4.8	0.501901	-0.717005	1.80428	3.95494	4.45683	4.27229	-0.501063	0.610595		2.05357	1.71696	1.9683	1.49437	1.19971	1.82344	1.0479	1.65979	1.40897		2.05357	26.0526	11.7504	15.5784	0.238164	8.48777	22.7426	14.1924	15.8211
4.9	3.59178	0.53428	3.68572	0.337546	0.22928	-1.17301	1.97416	4.91086		2.09632	1.59199	1.71749	1.35619	1.09097	1.67588	0.98287	1.50341	1.30293		2.09632	24.5979	12.7059	14.2337	4.92637	9.08353	20.1995	11.8243	11.5728
5	-0.0316359	3.00354	-2.97346	0.99534	2.11076	2.53886	1.39692	1.27444		2.13907	1.38438	1.68989	1.18661	1.03134	1.55539	1.07669	1.47838	1.39596		2.13907	20.7584	11.0987	15.7548	6.59162	6.25619	19.14	11.1891	10.4643
5.1	3.05754	-0.630276	5.01247	1.04045	-0.278368	4.41257	0.820564	-0.528596		2.18182	1.46768	1.63558	1.01198	1.03613	1.38913	0.971759	1.5597	1.35852		2.18182	17.9311	10.8825	14.4787	7.81439	7.96005	18.698	9.12409	10.2497
5.2	0.649605	0.00929342	0.174648	1.69236	0.995603	1.40169	1.4634	-1.7226		2.22457	1.31656	1.28682	0.837848	0.897546	1.07274	0.994177	1.36949	1.3512		2.22457	15.2071	10.8657	13.2355	9.30156	7.02499	17.7312	11.0262	10.6779
5.3	-0.537945	1.25478	-0.998819	1.72991	0.437076	-1.60662	0.883641	-2.30935		2.26732	1.26962	0.912186	0.742877	0.834174	0.90061	1.00911	1.35918	1.3559		2.26732	11.7353	9.98811	11.7676	10.446	6.65848	16.3405	10.122	10.2086
5.4	-0.507357	-0.553315	-0.95412	-1.28457	2.92762	0.875493	0.913043	0.14899		2.31007	1.2401	0.742606	0.482736	0.805899	0.643616	1.05366	1.21628	1.22203		2.31007	10.4114	8.00593	11.2407	11.6759	9.43605	13.2143	8.95321	9.04296
5.5	2.56829	0.0789588	1.52594	2.411	-0.685082	1.52025	3.37972	-3.49981		2.35282	1.08491	0.551798	0.373749	0.744781	0.496561	0.978555	1.14303	0.995169		2.35282	10.7629	5.08408	8.99063	9.3145	10.0638	7.80915	9.67334	8.63838
5.6	3.80514	0.707993	5.82689	1.82786	1.19629	2.16061	0.352284	1.39043		2.39557	0.981873	0.406021	0.290183	0.580325	0.457632	1.0463	0.97709	0.734872		2.39557	11.1864	2.42157	7.17836	9.7353	10.8235	6.44396	9.80648	7.30729
5.7	1.37776	3.773	5.84773	-1.80596	1.85357	-0.861824	2.8172	3.82741		2.43832	0.992206	0.300757	0.227826	0.512653	0.356424	1.15057	0.94292	0.715714		2.43832	10.4238	1.59604	6.06082	11.8417	10.7226	4.14173	8.94814	10.2696
5.8	1.39104	-0.486504	-2.06144	2.49108	-1.14983	0.996806	4.6662	2.59663		2.48107	0.881332	-0.0332489	0.0898712	0.493097	0.403912	1.10509	0.90614	0.702081		2.48107	8.5155	-0.301193	3.67885	11.4038	10.7865	2.06986	9.44497	7.82115
5.9	2.01106	1.35862	1.01732	1.89858	5.60778	0.409957	-1.41629	3.80299		2.52382	0.820569	0.0180817	-0.116953	0.309167	0.266949	0.967935	0.703833	0.710342		2.52382	7.10172	-0.688024	3.10253	10.4632	12.483	-3.13124	10.3041	9.29727
6	-1.03139	3.19899	-1.40093	1.30424	-1.67306	-0.788175	0.438952	-1.09468		2.56657	0.689761	-0.0608978	-0.0833679	0.221536	0.341592	0.947427	0.658649	0.518591		2.56657	7.57552	0.292577	3.63157	5.67173	10.9376	-2.60093	10.0083	12.115
6.1	1.41735	1.98605	1.67028	0.70811	1.42533	1.67201	-3.80778	4.37897		2.60932	0.566882	0.181241	-0.0250916	0.192908	0.375272	0.783041	0.756293	0.26264		2.60932	7.89645	-0.750132	3.0231	2.96441	10.1672	-2.08268	12.0587	13.1298
6.2	2.63938	-0.444642	-0.145538	3.15903	-0.361404	0.466356	0.489702	3.7403		2.65207	0.401596	0.180838	-0.0970947	0.274432	0.233685	0.783835	0.79628	0.0784576		2.65207	7.98962	0.98704	1.63301	3.10055	9.2352	-2.17626	10.0908	13.2978
6.3	1.41779	4.44596	2.30757	4.99247	-0.926194	-0.129499	-1.31936	-1.77882		2.69482	0.48497	0.170184	0.0838409	0.410696	0.291986	0.741641	0.835373	-0.154996		2.69482	11.1408	2.60501	-1.6816	3.37177	9.37008	-1.82052	10.8478	12.1715
6.4	3.85514	-2.8683	1.09454	0.112137	0.338214	4.15161	4.19163	1.85562		2.73757	0.407761	0.264035	0.279767	0.497507	0.336032	0.579614	0.783496	-0.215314		2.73757	12.5234	1.13853	-1.9381	2.69191	7.88415	-1.28934	9.52702	11.4589
6.5	-1.64078	2.02694	-1.94803	6.21393	4.03783	-5.60201	4.20353	4.25995		2.78032	0.506757	0.257797	0.597919	0.716138	0.223578	0.297427	0.860999	-0.358392		2.78032	14.9637	4.19561	-2.25807	1.28755	7.653	0.181061	8.51416	5.87048
6.6	-0.420209	-1.62372	0.5006	0.105769	4.67992	3.5639	1.77605	-0.0508884		2.82307	0.528079	0.189136	0.834619	0.715646	0.283759	0.0992798	0.780148	-0.418939		2.82307	14.8099	7.57904	-1.51479	0.61143	6.46391	-0.957728	6.90689	6.06522
6.7	-1.03267	4.48924	-0.106802	0.104358	2.27032	-1.92401	2.40187	-0.0878955		2.86582	0.356165	0.128177	0.922073	0.69187	0.14798	0.111362	0.782071	-0.143622		2.86582	13.8757	6.9294	-1.67612	1.00411	5.67235	-1.95264	5.0212	5.08957
6.8	3.23291	2.66398	1.11397	0.100148	4.74162	1.74358	-0.632243	-0.737219		2.90857	0.39606	0.171365	1.11443	0.569321	0.256006	0.166623	0.770605	0.103781		2.90857	10.8317	7.6444	0.798035	1.19838	3.2765	-1.42065	5.39072	4.37187
6.9	-1.65704	0.233423	-3.15751	-2.3458	1.71841	3.57322	2.4369	3.49039		2.95132	0.484448	0.112582	0.933966	0.478424	0.0407806	0.0554443	0.733463	0.0131592		2.95132	10.6728	7.63408	-0.911367	-0.397196	5.55776	0.933517	2.39555	2.18538
7	0.778973	0.247622	1.11387	0.0883096	-0.691103	-0.0898428	4.88993	2.2198		2.99407	0.634091	-0.00542297	0.845096	0.401965	0.00252686	0.00289612	0.601895	0.0829254		2.99407	8.87556	7.17794	0.733576	-1.01808	5.73333	0.0318146	1.50611	0.605743
7.1	0.160881	1.48232	2.32607	2.51479	0.560458	4.78955	1.24031	1.55964		3.03682	0.613766	-0.0302094	0.812616	0.497736	-0.0437805	-0.0865509	0.541284	0.139807		3.03682	7.72443	6.58261	1.1682	-1.37846	7.42637	0.761063	0.904912	-1.41817
7.2	-4.11485	1.49619	1.70471	0.665436	-0.0220307	1.73139	0.0365542	2.1187		3.07957	0.517584	-0.139124	0.597269	0.592319	-0.110596	-0.124908	0.404037	0.155798		3.07957	7.44037	2.70493	0.658025	0.222921	6.91862	-0.616369	-2.96799	-3.44479
7.3	3.20281	3.34036	2.30225	0.646213	0.613656	-0.712074	0.66396	-0.373474		3.12232	0.409665	-0.208926	0.433972	0.480338	0.065152	-0.0158691	0.258908	0.144461		3.12232	4.44253	0.0871175	-1.17913	0.831696	5.16553	0.214696	-4.62572	-3.84262
7.4	0.13998	2.74295	1.67746	2.45359	0.0260473	1.11651	3.11871	-1.64242		3.16507	0.372751	-0.194794	0.314221	0.351086	0.138815	0.145892	0.140967	0.27168		3.16507	1.90293	-1.73029	-0.701146	1.67499	5.30897	0.678553	-4.10917	-2.16644
7.5	1.961	2.14778	0.442609	1.20609	-3.61168	2.33073	0.0800357	-1.08063		3.20782	0.34541	-0.32403	0.0984772	0.260171	0.192755	0.309241	0.0767822	0.391129		3.20782	0.00352478	-2.50693	1.06048	3.21065	2.78121	0.490534	-5.37147	1.01955
7.6	1.94897	0.945052	2.25751	-2.48044	-0.53755	1.71233	2.53422	3.1377		3.25057	0.216382	-0.494635	-0.300055	0.231363	0.202524	0.153146	-0.167474	0.440518		3.25057	0.86644	-4.7182	3.19126	1.96715	1.97579	0.664881	-4.61894	-0.828456
7.7	4.37587	-0.254366	-1.42023	-0.0646484	2.52786	1.70401	0.71428	0.639845		3.29332	0.179147	-0.351297	-0.377216	0.142862	0.239822	0.0409363	-0.297101	0.410678		3.29332	2.3327	-3.63787	5.14149	0.219549	-1.29079	0.762665	-2.4972	0.758372
7.8	5.5785	2.20791	0.395747	1.73415	0.0968831	4.13388	-1.1032	2.41475		3.33607	0.14603	-0.332852	-0.279004	0.139926	0.361597	0.145395	-0.251166	0.260434		3.33607	1.08514	-2.74888	3.25819	-0.934372	-3.37091	1.47985	-2.62345	3.54106
7.9	1.29127	1.00759	0.987417	-2.57038	1.93636	-0.758757	1.34991	-1.30179		3.37882	0.223511	-0.0974426	-0.376849	0.151657	0.297498	0.101874	-0.23031	0.147968		3.37882	3.01573	-4.18805	2.35326	0.962067	-5.16434	1.24323	-2.81416	3.97878
8	0.0615581	1.63965	1.5768	1.05825	4.37937	-0.154579	-1.08112	-1.35242		3.42157	0.0845795	-0.181567	-0.28154	0.139523	0.208237	0.113846	-0.187509	-0.00819702		3.42157	0.667689	-2.87543	1.2889	2.6868	-6.94391	0.991791	-2.39476	3.01455
8.1	1.88344	0.441841	2.164	1.01928	1.32723	4.71606	3.8082	1.64608		3.46432	-0.0551849	0.0332092	-0.08638	0.0964355	0.258374	0.0878265	-0.186609	-0.275674		3.46432	0.359782	-2.25577	2.43731	4.23632	-7.18539	1.94694	-1.1825	2.36137
8.2	3.09253	2.90544	5.18807	-0.240867	1.32723	1.64975	-2.28916	-0.238885		3.50707	-0.188031	0.0556	0.129684	0.0325165	0.155692	-0.161905	-0.140073	-0.24903		3.50707	-1.32343	-2.74824	4.55992	3.14267	-8.39847	4.59715	-2.35663	1.71538
8.3	1.25118	-1.34255	0.888283	-1.50011	2.54407	-1.41101	-0.449489	0.929235		3.54982	-0.251157	-0.087085	0.297787	-0.079895	0.0360352	-0.260297	-0.159592	-0.261908		3.54982	-0.820587	1.63381	3.93145	3.56466	-7.18372	3.82989	-2.01204	0.64743
8.4	0.0240659	5.39372	0.254604	2.11968	0.0974165	1.63125	-2.2739	-4.00164		3.59257	-0.347559	-0.110391	0.275574	-0.20033	0.107108	-0.244662	-0.245438	-0.23363		3.59257	-2.30047	3.54335	3.2092	5.20141	-6.93382	3.93359	-1.48618	3.10688
8.5	1.84907	1.75114	3.27972	2.07253	5.57983	4.66695	2.00063	-0.385331		3.63532	-0.567865	0.0114014	0.215155	-0.427579	0.158606	-0.134589	-0.211353	-0.128607		3.63532	-3.19777	1.49493	3.36678	4.72729	-7.47051	2.27356	-0.411875	1.84212
8.6	1.84216	2.99376	3.24923	4.4633	5.56125	-0.23057	1.38644	3.83465		3.67807	-0.638126	0.0509644	0.278241	-0.578329	0.210007	-0.10267	-0.294217	-0.375208		3.67807	-6.23462	3.61863	2.55082	5.64314	-6.33084	2.72141	-1.46119	-0.236293
8.7	4.27522	1.79473	0.779058	-3.51729	0.0527337	0.368877	1.38075	0.120809		3.72082	-0.680573	0.0462036	0.103705	-0.601114	0.0188385	-0.183719	-0.405606	-0.613803		3.72082	-6.06072	3.3701	0.243083	2.59895	-4.24171	3.37726	-0.554153	-1.90104
8.8	-0.00274116	4.86592	1.97161	1.93165	-1.7884	-0.252782	0.153063	1.90343		3.76357	-0.588916	-0.0244507	-0.0241821	-0.738022	0.0138947	-0.315054	-0.423505	-0.532437		3.76357	-5.86259	1.1605	-0.103638	-0.286107	-3.86905	2.9358	-0.796799	-2.47088
8.9	-2.44191	-0.605951	-0.497248	1.88151	-1.79849	-0.873607	1.97402	3.68399		3.80632	-0.639181	-0.0698273	-0.0668549	-0.558447	0.0259644	-0.418839	-0.468674	-0.563986		3.80632	-5.85437	-0.476003	-3.32427	-1.91996	-4.032	3.87097	-1.38629	-5.94707
9	0.612572	-3.01891	3.13586	1.22142	-1.81024	4.60385	1.34981	3.63334		3.84907	-0.594577	-0.103116	-0.198917	-0.548056	0.0669312	-0.443204	-0.539371	-0.489755		3.84907	-5.74079	-3.11965	-2.48525	-1.64332	-5.83863	5.28205	-3.72914	-8.29324
9.1	1.83285	1.88906	-0.55547	-1.26668	3.66416	3.97253	2.55349	2.97462		3.89182	-0.474786	0.0470489	-0.306924	-0.48071	0.135284	-0.334671	-0.682834	-0.349933		3.89182	-6.85405	-3.90257	-2.98526	-3.86703	-5.14154	6.03063	-1.11324	-6.97706
9.2	1.83225	1.29861	-3.62996	-1.31074	0.589955	1.51277	0.0936674	-0.120087		3.93457	-0.340454	0.112695	-0.385291	-0.489151	0.0440002	-0.361618	-0.740414	-0.222995		3.93457	-5.93478	-4.67262	-3.1779	-4.49	-7.72765	5.62815	-1.03121	-9.04284
9.3	5.49113	0.0984612	2.44768	2.91376	-0.0401942	-1.55239	0.0750548	4.71982		3.97732	-0.304269	0.166904	-0.36442	-0.448846	-0.00414124	-0.391553	-0.778128	-0.153983		3.97732	-5.61863	-4.81626	-3.52777	-5.50369	-9.09134	6.07167	-3.99554	-10.5594
9.4	0.607313	-1.1006	-1.2428	-0.796338	1.15931	0.265953	3.71231	0.405772		4.02007	-0.28259	0.196555	-0.463309	-0.305902	-0.0419006	-0.481665	-0.820685	0.0795898		4.02007	-5.01738	-8.64373	-4.40526	-6.81918	-8.26907	6.21371	-1.39302	-12.5309
9.5	1.2218	-0.469444	-0.0480433	4.03812	2.96556	-0.358917	3.07149	0.980135		4.06282	-0.139075	0.307471	-0.406079	-0.393774	0.0662384	-0.512445	-0.750241	0.0662689		4.06282	-6.44648	-8.57707	-4.56213	-6.92956	-13.1189	3.69621	-1.65267	-12.6514
9.6	0.616522	0.768678	2.36389	3.98602	0.499589	2.67529	0.600108	0.335833		4.10557	-0.462131	0.40647	-0.809851	-0.645828	-0.0319641	-0.520291	-0.987442	-0.312723		4.10557	-10.3405	-9.2608	-4.94968	-5.07102	-14.6078	-1.55867	-3.58987	-13.1181
9.7	0.623102	0.783195	0.502874	0.276743	-0.742181	0.215116	-2.47859	4.57291		4.14832	-0.625604	0.224127	-1.18186	-0.815878	-0.318887	-0.924646	-1.08862	-0.534106		4.14832	-12.6455	-12.1622	-6.11598	-6.97869	-18.7573	-3.60744	-6.3578	-14.1662
9.8	3.06954	1.40559	0.474902	1.45412	-0.76201	-1.63119	-0.0658627	5.75511		4.19107	-0.85762	0.0664734	-1.21979	-0.922104	-0.786783	-1.31728	-1.03284	-0.669421		4.19107	-12.6433	-15.1789	-8.12196	-7.6031	-19.002	-4.53361	-8.41606	-13.2229
9.9	3.07297	2.02476	-1.99176	0.191743	0.437868	0.793679	3.55923	2.66908		4.23382	-0.647156	-0.127972	-0.997961	-0.597943	-0.989514	-1.42601	-0.753003	-0.526941		4.23382	-11.3726	-14.106	-10.4616	-7.58083	-17.3845	-4.30556	-10.2035	-9.65575
10	0.63824	2.0309	3.4735	-0.456576	3.46496	1.99352	0.467716	-1.01819		4.27657	-0.35097	-0.204865	-0.39433	-0.0216095	-1.00428	-1.28029	-0.0429596	0.135211		4.27657	-8.27963	-11.9897	-12.3249	-6.57917	-11.8548	-2.85526	-6.98182	-6.63233
10.1	1.8676	3.25441	1.61132	3.77635	-2.65961	1.361	2.25831	-1.03722		4.31932	0.418475	0.0767975	0.571072	0.869232	-0.42095	-0.363202	1.09415	1.1273		4.31932	-0.804148	-7.27716	-12.1071	-3.14888	-3.23229	0.717219	-1.14382	-0.0147552
10.2	3.70499	4.47335	0.97275	-1.14316	3.42357	-0.490473	0.384927	1.99491		4.36207	1.56414	0.95527	2.12059	1.99182	0.724167	0.976578	2.65883	2.30233		4.36207	5.19143	-2.68002	-7.44739	1.8952	9.45153	5.89405	5.68369	9.36611
10.3	0.0516932	0.809697	2.77492	1.26646	4.61757	0.100035	3.39146	0.755136		4.40482	3.09551	2.1073	4.06578	3.5557	2.5315	2.89233	4.37527	3.97063		4.40482	17.6642	9.24976	-2.94661	7.92864	23.3985	12.8776	16.389	17.79
10.4	-1.15478	-1.01965	-2.74301	1.84461	-0.287205	1.90812	0.902687	0.739646		4.44757	5.28033	3.81063	6.38004	5.38227	4.42911	4.82347	6.27516	5.70177		4.44757	31.5395	22.9906	6.01094	16.0314	38.1518	22.7682	26.2053	28.6537
10.5	0.0805527	0.810919	-0.322955	2.42425	0.306738	3.71179	-3.41182	-1.10267		4.49032	7.7837	5.70876	8.60274	7.14162	6.96718	7.03529	8.36328	7.85432		4.49032	44.942	36.1985	16.9438	25.8075	54.3038	34.1669	39.5022	38.9154
10.6	1.31382	-2.85204	1.4829	4.22493	0.900895	2.46232	0.817466	0.719527		4.53307	10.3664	7.79214	11.2154	9.07661	9.57471	9.4757	10.5573	10.1753		4.53307	61.1271	53.2908	27.7115	36.8029	70.3868	46.4069	50.0972	52.0553
10.7	2.54497	0.197342	3.2856	3.58586	-0.943607	-1.22442	-0.450299	0.711265		4.57582	13.0766	9.94962	13.5994	10.9145	12.2937	11.8993	12.5819	12.2925		4.57582	76.9022	68.8334	38.5132	47.1825	84.6209	59.5861	61.0655	61.3995
10.8	2.55447	0.799692	0.207337	1.73141	-0.343837	3.02209	-0.496757	-0.513994		4.61857	15.6428	12.1988	15.8783	12.4846	14.8654	14.3747	14.2644	14.264		4.61857	92.6567	84.0156	53.3403	57.7002	97.2481	71.5619	72.0157	74.1835
10.9	-4.75284	0.789247	4.45274	4.76145	0.256432	-0.0575873	0.0661714	0.704711		4.66132	18.0336	14.2745	17.8512	13.8082	17.3491	16.7667	15.759	16.1836		4.66132	104.875	96.9778	63.502	70.5388	106.886	80.051	81.8496	85.1659
11	-0.460325	-0.442446	0.76359	-3.18706	2.68657	1.1363	-2.42103	0.704122		4.70407	19.9967	16.0854	19.4069	14.7953	19.3908	18.7753	16.8888	17.5162		4.70407	114.055	108.976	73.5679	81.9477	112.674	87.2859	86.8305	90.9707
11.1	1.99455	0.155936	1.35053	-0.751182	0.845599	2.93683	-0.025476	0.0963785		4.74682	21.4793	17.5357	20.6568	15.4865	21.1318	20.32	17.5711	18.5109		4.74682	121.085	117.377	82.7307	91.7772	122.048	92.4941	92.4308	96.9037
11.2	1.39585	3.19068	3.76609	4.73151	3.88819	-0.754629	-0.683408	0.102249		4.78957	22.4317	18.3477	21.1304	15.6326	22.3027	21.3514	17.8147	18.959		4.78957	126.814	122.726	90.7324	102.558	125.599	97.3464	94.2496	99.3131
11.3	-0.421107	-2.31839	1.29946	1.05996	1.439	0.438589	2.31866	-0.498928		4.83232	22.7182	18.8196	20.8336	15.2724	22.8163	21.6506	17.392	18.5182		4.83232	127.827	126.301	96.7708	108.275	122.1	98.0165	90.7591	98.6265
11.4	2.64359	0.718639	0.667526	-1.38208	1.43564	4.67761	1.65668	2.56222		4.87507	22.2306	18.7996	19.8921	14.4087	22.5751	21.4093	16.4345	17.6468		4.87507	126.279	124.026	97.7512	108.883	119.481	95.5124	86.1738	93.304
11.5	1.4341	0.0899686	-2.40154	-1.37777	7.53181	1.59073	3.43556	2.57103		4.91782	21.45	17.9849	19.0593	13.5515	21.6802	20.4538	15.4906	16.6806		4.91782	122.45	118.304	94.1285	108.16	114.092	93.4528	82.9908	88.7868
11.6	0.836809	3.11993	-1.80545	1.67759	6.91077	-2.70994	0.943479	1.97249		4.96057	20.4085	16.9787	17.9967	12.6954	20.3341	19.3251	14.3251	15.805		4.96057	121.061	112.282	91.6554	107.158	109.491	91.9125	78.7042	86.7332
11.7	-1.58862	-1.17404	-1.20991	2.89976	-1.63351	-2.73413	4.5548	-1.67127		5.00332	19.181	15.6	16.7759	12.0484	19.0549	18.2124	13.2806	14.7804		5.00332	113.188	105.872	85.6721	104.707	101.392	87.008	72.6541	81.5926
11.8	1.47822	1.85664	3.65328	-0.146935	0.816922	1.50979	6.33086	2.01135		5.04607	17.8394	14.3609	15.5803	11.3727	17.5822	17.1444	12.3786	13.8278		5.04607	107.397	98.001	83.3882	100.433	97.049	82.9965	68.9583	75.1171
11.9	2.09967	1.83189	1.19048	4.7406	3.26484	2.08682	-1.04155	2.03017		5.08882	16.5099	13.2688	14.6533	10.6362	16.2889	16.2941	11.6642	12.9946		5.08882	101.278	91.7069	78.6386	94.7927	92.5788	79.4625	64.7467	72.2509
12	3.93897	2.41634	3.00135	-0.136296	2.05179	1.44337	3.79686	0.221572		5.13157	15.2819	12.3715	13.8279	9.86963	14.9647	15.3133	11.0824	12.1415		5.13157	95.798	86.5053	74.8247	91.9781	87.8838	73.4301	61.562	68.4588
12.1	0.896135	2.38935	3.58969	2.3144	1.45322	2.63072	0.0905699	5.12549		5.17432	14.3627	11.6164	12.8991	9.44213	14.1029	14.3764	10.4407	11.553		5.17432	95.337	85.4041	67.9587	89.7072	82.7383	70.3745	58.5716	64.7279
12.2	3.34645	5.41066	-0.700559	-0.117012	0.858094	3.20642	4.92953	3.31405		5.21707	13.754	10.9855	12.1596	9.00828	13.0314	13.3234	9.90224	10.8272		5.21707	91.7315	79.2397	64.6445	85.9411	79.4124	68.7462	54.9689	62.8292
12.3	3.3521	0.498896	0.505969	-1.32355	0.876033	1.34256	2.44337	1.50765		5.25982	12.9306	10.2901	11.4143	8.44374	12.2382	12.4603	9.31058	10.396		5.25982	87.0744	75.6361	60.7145	84.3088	77.2804	65.6553	55.3322	60.9687
12.4	2.74705	1.08437	-0.728291	-1.91758	-0.933306	0.092819	-1.86559	0.315788		5.30257	12.2435	9.86969	10.9675	8.06089	11.4903	11.8081	8.88011	10.0612		5.30257	86.8191	73.2731	54.4652	80.1591	73.1774	62.7904	53.3329	61.8537
12.5	1.53247	4.10751	1.08924	1.75796	0.921308	2.50476	-0.676743	-0.262975		5.34532	11.5656	9.4579	10.2653	7.64506	10.8638	11.0506	8.34419	9.57844		5.34532	84.0444	68.0317	50.4666	76.1614	69.3277	58.2582	52.2533	59.5757
12.6	-1.5099	4.07578	4.73301	1.158	1.55451	0.0346852	1.73075	2.20888		5.38807	10.8734	9.19543	9.71719	7.43203	10.2126	10.5172	7.76129	9.0601		5.38807	82.623	66.1183	46.593	72.4564	64.6789	51.7307	49.3511	60.0262
12.7	-0.8887	2.82443	2.27266	5.43697	0.358878	3.05806	0.47649	1.01792		5.43082	10.2068	8.84589	9.26296	7.16177	9.8049	10.0404	7.27563	8.83867		5.43082	80.6899	64.8598	40.9651	69.4607	58.7125	45.7772	49.0887	56.7628
12.8	0.34006	-0.253898	1.03721	-4.92687	3.43535	-0.630913	-1.38358	-0.779972		5.47357	9.75959	8.50158	8.89608	6.9442	9.37465	9.5513	6.8473	8.39109		5.47357	77.0367	63.1148	39.2124	67.5657	56.7157	42.3317	48.3859	54.8145
12.9	2.7849	-0.887355	-0.805063	-0.636868	0.409716	-1.8727	1.63934	-1.96425		5.51632	9.31784	8.10963	8.51924	6.58849	8.93388	9.19617	6.41087	8.11138		5.51632	72.7567	61.6715	38.9393	65.6724	55.5886	39.639	47.8271	51.6203
13	-1.4833	2.13872	1.62497	0.595033	2.26935	1.76682	-0.22045	1.1221		5.55907	8.91924	7.82579	8.06728	6.10755	8.5277	8.76284	5.93123	7.60318		5.55907	70.0835	59.3406	36.8397	65.8873	52.8766	42.8357	45.9252	50.5155
13.1	1.57278	-1.54855	1.61159	1.82338	1.07781	2.35126	2.80267	1.1535		5.60182	8.52287	7.65199	7.59328	5.69166	8.07095	8.4558	5.33642	7.18369		5.60182	66.3085	56.9847	36.7814	62.4454	49.4676	40.599	45.6483	46.6742
13.2	1.57291	1.47859	2.81809	1.82855	-0.110295	3.5452	2.7723	0.57481		5.64457	8.07432	7.48139	7.33094	5.21239	7.66726	8.17775	4.94792	6.82904		5.64457	62.0847	52.4572	34.2543	59.2848	45.7931	38.1328	45.9106	42.7581
13.3	0.962128	2.06069	2.80309	-1.21646	-3.12435	-1.9695	0.913963	3.04561		5.68732	7.7209	7.11812	7.12856	4.88573	7.43976	7.87641	4.63766	6.46408		5.68732	57.3413	49.4597	32.9668	59.3162	43.2787	37.2892	45.0526	41.3814
13.4	-0.868079	0.812368	3.39818	2.45017	-0.643902	3.50306	4.54819	-0.586421		5.73007	7.49557	6.87302	6.66946	4.62107	7.08894	7.53451	4.41219	6.24711		5.73007	56.0618	45.8255	33.8532	57.4516	37.2258	34.9366	42.1	44.8087
13.5	3.40159	0.786051	-3.32465	-0.599415	-1.21648	1.03891	-0.969859	-0.553312		5.77282	7.20995	6.5182	6.38589	4.38423	6.81288	7.25699	4.35384	5.8967		5.77282	48.304	42.787	31.531	54.3277	32.6881	32.8681	36.6669	42.6547
13.6	3.39331	1.36954	-3.3268	-0.596004	-0.568028	1.62924	1.45092	3.74726		5.81557	6.98768	6.23506	5.94991	3.98312	6.34224	6.90846	4.23717	5.53119		5.81557	46.0596	41.6906	33.2459	48.2271	31.2512	31.7367	32.8204	39.4554
13.7	0.335138	0.732369	-0.28009	2.45441	-0.530376	-0.829526	-3.44874	1.94113		5.85832	6.5809	6.16388	5.69576	3.68148	6.00285	6.43621	4.15779	5.22001		5.85832	43.148	40.3936	32.2278	45.0885	28.5866	30.2938	30.8208	38.7201
13.8	-0.279162	1.92567	0.321621	0.619088	3.77537	-0.843656	-0.410622	3.79638		5.90107	6.27629	5.9003	5.18726	3.42205	5.65469	5.83644	4.14541	4.76954		5.90107	40.9477	38.8921	32.2339	41.2255	27.1644	28.8123	29.562	37.6848
13.9	0.935751	-1.15165	-0.297402	0.614875	0.755186	3.41112	2.62277	0.159522		5.94382	6.13416	5.82259	4.8711	3.18894	5.48599	5.40426	4.06578	4.49364		5.94382	38.9288	39.2595	31.5371	40.7906	27.0977	27.2664	28.3763	39.1123
14	4.58583	3.09396	0.30416	1.21872	2.00836	0.950801	-1.05576	0.187681		5.98657	5.97079	5.74507	4.97528	3.01769	5.12971	5.03951	3.94051	4.32097		5.98657	35.8441	36.0747	32.1948	37.5133	28.938	27.8292	26.5998	38.224
14.1	1.51998	-3.0348	0.904327	4.25876	0.209102	3.37383	3.8107	-0.394593		6.02932	5.55908	5.58663	4.76046	2.84797	4.80564	4.66164	3.81262	4.17095		6.02932	33.1305	35.1155	31.9658	36.823	27.4547	24.0628	27.078	37.6709
14.2	-0.321747	1.21397	-0.935965	0.584066	1.46064	2.13407	-1.69688	2.68207		6.07207	5.15627	5.42981	4.58942	2.84942	4.64035	4.27985	3.70872	3.84938		6.07207	30.6673	33.4232	30.5005	33.3427	25.7426	23.2501	24.8939	33.6272
14.3	3.3265	2.40526	0.885467	-0.0359321	1.48842	-0.322262	1.95397	0.873843		6.11482	4.69982	5.21746	4.71304	2.9823	4.2975	3.88694	3.46666	3.67362		6.11482	28.1769	32.5937	29.3756	31.5131	25.4899	20.0946	23.8435	30.0471
14.4	2.6979	1.15486	0.263836	1.78315	3.34326	5.76316	0.720885	0.897529		6.15757	4.39236	4.96351	4.74395	3.01669	3.93424	3.73341	3.33559	3.53978		6.15757	27.6052	33.0586	28.3406	27.1479	23.3174	18.1789	20.9439	25.2486
14.5	0.240013	-0.0934705	2.08195	1.15868	0.314068	-6.45555	0.101272	-2.12855		6.20032	4.091	4.72333	5.12723	3.05729	3.76593	3.66112	3.2642	3.61141		6.20032	23.546	33.4242	26.5043	26.3276	23.3833	16.9354	22.1782	23.1812
14.6	2.66371	2.31875	4.50572	2.97369	0.336973	5.74011	-1.12557	-0.271754		6.24307	4.03511	4.50534	5.20066	3.08781	3.49063	3.52776	3.14578	3.4457		6.24307	22.2347	31.7654	28.6445	29.1676	24.7888	15.3538	23.7777	23.5353
14.7	-0.406303	3.50632	0.826785	-0.0934713	4.62513	0.838876	1.91951	-0.858805		6.28582	4.00442	4.42851	5.29464	3.05385	3.30248	3.50148	2.96303	3.45881		6.28582	20.3818	31.6813	29.5974	28.5759	25.8031	16.0771	23.7168	19.4365
14.8	-0.422636	-0.186767	-1.01597	-0.715984	0.365137	-1.00368	2.52081	4.65155		6.32857	3.83283	4.55982	5.38177	2.96361	3.1229	3.33462	2.7125	3.41289		6.32857	19.6516	30.1067	30.0889	29.4372	25.9205	17.5946	26.0564	19.4668
14.9	-1.65947	-0.824026	4.4615	1.1015	4.64662	0.816091	-1.75587	1.61333		6.37132	3.8695	4.51367	5.35893	2.97242	2.95494	3.39395	2.64907	3.51906		6.37132	19.6918	32.9845	32.8307	28.7054	25.9972	15.7933	26.1924	17.7111
15	0.153938	0.978763	-0.437953	-0.133418	-0.230225	1.41295	3.12335	2.84817
15.1	1.35315	0.338816	1.3792	-1.36583	1.60608	0.179635	5.55509	0.420766
15.2	-0.499461	0.919571	2.58273	-0.156633	-1.44313	0.168531	-1.16301	2.26496
15.3	1.91924	0.279783	5.0031	-0.169042	0.387635	1.98699	1.88939	-3.82271
15.4	0.674152	0.860933	2.54044	4.08717	1.60094	3.80213	0.668736	-0.753589
15.5	0.65053	0.831387	-0.527414	0.408736	0.978424	-2.92243	-1.7677	1.08851
15.6	1.84597	0.192337	-1.76033	-0.212984	3.4016	1.34222	-2.36887	-0.123234
15.7	0.599604	-0.445301	-0.552157	1.60631	1.54745	1.94045	2.52009	1.10489
15.8	1.79437	0.137965	-0.566123	0.983842	1.52192	1.31852	0.0835752	0.499882
15.9	-3.11083	1.32997	2.46842	-0.246231	-0.946762	0.0885971	4.36039	0.504396
16	-1.9089	0.690617	-1.82021	-0.863087	2.07307	0.690888	0.0935528	-0.102189
16.1	3.55882	0.0529006	-0.00298289	-0.258196	1.42448	1.29253	-2.33424	-1.92834
16.2	-2.56934	4.29483	1.81052	5.22445	2.60257	-0.545401	0.731888	0.516137
16.3	-2.58757	4.87038	1.79111	5.20952	-2.93253	3.1087	3.18369	2.34486
16.4	2.27261	0.567446	-2.49652	2.75671	0.0763829	3.09772	3.19329	5.99811
16.5	3.46518	-1.28724	1.76085	1.52933	0.63714	-4.83916	0.765658	-0.112828
16.6	5.2658	1.13083	-1.91689	2.13464	-0.63533	0.65498	0.783693	-0.115045
16.7	2.79548	3.54505	2.33933	3.34946	-1.90777	-1.17783	2.02317	1.1015
16.8	2.76998	1.68726	2.92859	-0.924843	1.08831	1.87183	2.65247	3.53443
16.9	2.13575	0.443993	1.07782	-2.14089	-1.41128	1.86757	4.50208	0.474117
17	1.50381	5.30182	1.66994	0.30501	-0.249118	0.644829	0.862442	2.2972
17.1	4.53275	-0.214458	3.48068	-0.301645	0.909362	3.08411	0.89067	-1.37168
17.2	5.11797	-0.840486	1.02003	-1.51588	2.06452	0.0320246	0.311311	2.28306
17.3	2.04487	1.58489	-2.04497	-0.287847	1.99719	1.25547	-2.09391	2.27159
17.4	-1.02074	2.78745	2.21368	-0.280993	-0.509396	4.30708	2.21508	1.65004
17.5	-2.24964	3.98915	0.367079	-0.273452	-1.79163	2.47611	1.63967	1.63918
17.6	1.4032	3.36084	0.96379	1.56398	1.19703	0.0404949	1.67712	-2.03039
17.7	2.00134	0.906231	2.16987	1.56918	1.13151	3.09888	3.54556	2.84361
17.8	3.20924	0.287461	-0.283986	2.79455	2.28638	4.32347	0.534031	-0.21881
17.9	0.757368	-2.76731	2.75579	4.01815	-0.218414	-1.16003	-0.640707	4.04177
18	1.96988	1.50262	0.912735	2.19109	0.941682	-1.75314	-0.59212	-3.90103
18.1	-1.69703	-3.38041	-0.9254	2.19735	3.93041	3.14416	-0.542282	4.63513
18.2	-2.3071	0.284396	2.11949	2.20399	-2.23099	0.10657	0.118365	-2.08913
18.3	1.96275	-0.324618	3.33058	2.82074	-1.67067	0.735052	0.168946	-3.31207
18.4	1.34679	2.11795	1.4922	1.60738	4.37875	0.754084	-0.999262	1.56527
18.5	-2.31612	4.55729	-2.17002	-2.65198	3.10185	3.21353	-2.16451	0.335991
18.6	-0.483545	-0.93327	2.10351	-2.02459	1.22061	-1.64738	-3.93675	1.54876
18.7	4.39465	3.34465	0.882668	1.04084	4.22414	2.03917	7.09937	-2.11809
18.8	4.99536	-0.311022	-1.55337	-0.777465	3.5665	2.67089	0.430817	2.14988
18.9	1.32691	3.35905	2.11485	1.67634	3.5234	1.47323	5.36026	-0.906611
19	1.32432	1.53559	-0.319705	-3.19145	0.435316	1.49844	0.523388	1.53168
19.1	-0.507462	-2.112	0.91109	-1.95188	2.84487	0.914741	0.573247	5.79541
19.2	0.103364	0.346551	0.922082	-2.54374	2.81457	-0.886528	-0.597539	2.73479
19.3	3.15176	2.80159	-0.893935	1.13414	0.349391	-1.46411	2.50093	2.73007
19.4	-1.73292	-0.844329	-0.874778	-1.29238	1.55179	2.22815	2.54304	0.89722
19.5	-1.12063	-0.823157	0.366258	4.82277	3.36589	1.03543	1.36397	0.89838
19.6	0.709351	1.63824	-1.44143	4.82877	0.912583	1.67437	-0.424373	0.290964
19.7	0.096037	-2.00147	2.2447	-2.48174	0.297745	-1.34656	1.44726	0.295618
19.8	0.702679	2.90367	1.65787	0.5884	0.298214	-0.0935288	-0.95526	-0.308379
19.9	2.52674	2.3125	-0.144725	1.82362	1.52249	-0.672648	2.74212	0.30937
20	-2.36098	1.72356	2.32701	3.05678	-0.909888	1.79749	3.38098	2.75617
20.1	0.0769153	-0.692397	2.35734	3.67809	2.15437	-0.00631093	-1.4717	0.9309
20.2	1.28945	-1.27326	2.99965	1.24973	2.16767	1.85094	1.60936	-0.889797
20.3	3.10827	1.80649	3.64284	3.09474	1.57484	0.654624	-1.41577	-3.31572
20.4	3.09328	1.83239	4.28672	-1.16101	2.20602	2.50815	2.26958	-0.248261
20.5	2.46777	4.90793	0.0531877	-0.529928	0.400054	-1.13107	1.06687	3.42366
20.6	3.06228	1.88092	-1.12167	5.58802	0.429747	2.55241	-0.745992	0.991618
20.7	-2.44243	2.51938	1.97525	4.37722	-1.36719	1.95884	1.10041	-0.825077
20.8	-0.00995147	2.54781	2.6279	-4.14781	-0.719141	3.80395	-1.93763	0.411331
20.9	0.588205	-2.91055	-0.37863	0.758776	-1.28973	-1.0633	2.34452	0.426488
21	1.18501	2.00862	-0.330064	0.168187	3.63025	3.83357	-0.0917848	1.66174
21.1	-1.2682	0.821639	3.37698	-0.420961	3.05413	-2.25616	-0.696677	2.28533
21.2	1.77127	1.46725	1.58879	2.64976	-1.17825	0.811035	-3.13223	-0.750353
21.3	2.36599	0.283337	-2.63516	-2.21205	1.91551	2.65137	1.75146	3.53724
21.4	1.74039	-1.50689	-0.144119	0.862801	0.735259	-1.00078	1.74507	0.499563
21.5	-1.93219	2.19527	2.34111	0.883112	-2.27195	-2.20765	1.1267	2.95573
21.6	-0.71878	3.45214	2.9911	2.12319	1.43359	3.29421	-1.32183	-1.90988
21.7	3.54201	1.04901	-1.84918	-0.907078	-0.356712	-0.36188	6.59812	5.4289
21.8	4.13718	2.31011	-1.19362	-2.10169	0.294351	3.30548	-0.133457	3.60653
21.9	0.464401	1.74045	3.11755	2.19423	1.5524	-4.01045	-1.97545	1.17747
22	1.06879	2.39229	0.101531	2.21372	-2.07174	2.10214	-2.59581	6.06946
22.1	-1.37498	-1.22462	1.35797	0.404107	0.406909	3.32436	-0.167545	-0.0245728
22.2	1.67576	1.87355	-1.0484	4.08591	1.65912	-0.943569	-0.184296	-4.88804
22.3	2.28358	-0.521583	-0.403175	-1.99546	1.07747	-2.15414	1.01738	1.23234
22.4	2.89238	-0.472504	2.67762	-0.747821	2.9337	0.906221	1.60594	-1.19721
22.5	0.453454	-1.03287	2.7013	0.497257	2.95472	2.7415	2.1925	-1.18444
22.6	-0.149197	2.67637	-0.32611	-0.699308	-1.9046	0.915323	0.948028	-0.563604
22.7	0.471051	-2.15801	-0.910959	-0.0646009	4.82855	-0.906426	2.7543	0.663892
22.8	1.70208	0.334227	-0.887427	1.78787	-1.25862	-0.284699	-3.36991	1.27725
22.9	2.93305	1.60195	-1.47627	2.41661	1.20052	0.94657	0.273992	0.0581217
23	-1.3238	-1.4014	-1.45679	2.43375	3.65266	1.56668	3.30103	0.66851
23.1	5.40554	-0.131116	3.43805	0.620999	-1.8288	0.967026	3.27358	0.0559038
23.2	-0.680883	2.96507	-2.65478	1.25018	0.0156287	-0.240188	2.63682	0.0518919
23.3	0.563888	1.78586	2.23743	0.657866	2.46429	2.21448	0.172497	0.0454904
23.4	-0.02098	0.607853	1.02012	-0.543902	1.2478	0.39706	0.152536	-2.40241
23.5	-2.4319	-1.78848	-0.806767	0.0849419	1.25151	1.63296	1.35265	0.639728
23.6	-1.17761	1.91616	-1.41276	0.10166	0.643972	2.25765	1.94116	0.624562
23.7	4.34422	3.17311	0.41933	0.726837	-0.573443	2.88206	0.699788	2.43618
23.8	3.7594	2.59687	2.8555	4.39815	3.69811	-0.152404	2.51028	1.19293
23.9	1.34817	-1.0284	2.23614	0.134068	1.25295	1.6979	-0.559944	1.77887
24	-1.66647	1.4495	-0.213092	0.754972	0.641028	2.93548	1.25482	-1.90694
24.1	3.8626	-0.956969	-1.43962	-1.06589	-1.1898	1.73221	2.45725	1.72936
24.2	1.45497	2.12753	-0.835966	-2.27499	0.641001	0.531845	0.609594	2.91755
24.3	2.71131	0.936101	-0.234869	0.175158	-7.28813	1.16349	-2.45288	1.05292
24.4	2.74615	2.18444	0.363741	-1.03962	3.09063	2.40383	1.80865	-2.6388
24.5	0.342128	1.59945	2.78916	1.40489	-0.575483	2.42223	3.01398	0.382597
24.6	-0.228033	2.23347	1.55016	2.62347	3.08265	-1.21803	-1.26978	1.56739
24.7	-0.187772	2.86462	-1.51667	1.39916	1.24589	2.46557	2.38258	2.13884
24.8	0.461447	-0.165512	1.51918	-0.434001	-2.41631	-1.78543	-0.678626	5.14707
24.9	1.71825	-0.752155	0.280061	3.2226	2.46543	3.11736	-0.0744343	-0.388028
25	0.532494	-2.55857	3.31105	2.60213	4.89877	3.1313	1.74882	1.40406
25.1	0.567289	2.34441	5.11609	-1.06739	-1.20881	1.31453	-0.699083	0.143309
25.2	1.21028	-0.08063	2.03925	-2.29212	1.84242	-2.32957	-0.702573	-0.505578
25.3	-3.63734	1.1564	3.23649	1.36201	3.66871	3.17783	3.56262	-4.2021
25.4	-2.37956	-1.26862	0.162963	1.95858	0.00435098	0.745456	-2.54596	-0.574389
25.5	3.14219	-1.25078	3.19299	1.94258	-1.82264	-1.07464	-0.715445	-0.00256999
25.6	-0.495051	3.03444	1.94891	2.53457	-1.20605	-4.11309	-0.717646	-1.87066
25.7	0.141243	-1.22601	1.92689	2.51383	0.629881	0.168815	3.54837	1.75301
25.8	0.164484	1.22859	-2.97286	0.0522864	4.29248	1.39081	2.31805	1.71145
25.9	3.23424	-2.41966	1.2836	-2.40632	1.24172	-1.66058	1.69948	2.28028
26	0.808002	3.08505	-0.565505	1.84508	2.4664	0.169238	0.471776	-0.200009
26.1	1.43316	3.09065	-0.581353	-1.23101	-0.578311	-1.05613	-0.754251	2.81323
26.2	2.05499	1.87635	-0.596798	1.79428	1.26238	-1.06251	1.06993	2.16304
26.3	1.45407	-1.7749	3.04664	2.37238	4.93005	-1.07189	0.450311	3.95426
26.4	5.12059	-1.7608	-0.0240869	-1.93081	2.49433	1.35471	2.26956	0.255467
26.5	-3.41697	2.52104	-2.47878	-1.95941	0.0647046	0.115002	2.25458	0.833619
26.6	-1.57372	2.5257	1.77878	-2.59983	3.73853	5.58193	0.408913	3.85109
26.7	2.70306	-2.95775	-0.0694073	-4.46056	1.91847	0.0596519	-0.215141	2.59589
26.8	0.262462	1.32527	-1.30403	-0.222212	0.712786	-1.1862	0.379934	0.125295
26.9	2.09344	4.98967	-1.31669	4.00572	-2.92842	4.27505	-1.46681	1.31978
27	-1.56826	2.54889	-1.32934	3.34544	-2.2931	-3.08165	0.956538	-2.36434
27.1	-0.345933	-1.71677	0.487219	-0.973641	0.780912	0.549349	0.324443	1.27763
27.2	2.70209	0.732706	2.30011	-0.407596	2.63015	1.12226	2.13063	1.86546
27.3	-0.964103	-0.481634	4.10926	3.20481	-1.62097	0.472641	-0.946638	-3.03382
27.4	2.08342	0.744972	-1.40236	-0.507997	-0.985052	1.04208	-0.97088	3.05373
27.5	-1.5829	4.40762	1.02342	7.37084	-0.959612	-0.220431	2.05193	1.20412
27.6	0.855111	-0.47399	4.66361	2.4287	0.285657	2.17673	-1.64008	0.579228
27.7	-3.41912	-1.688	0.979311	3.59337	0.309177	0.909676	-2.8872	-3.09163
27.8	2.07106	1.97777	-0.868849	0.487248	-0.277125	0.254136	1.96431	1.17303
27.9	2.06286	4.41615	0.944645	-1.39323	0.966754	4.47743	1.31725	2.38207
28	0.225839	2.58081	-2.12397	-3.2697	1.59797	1.3753	-2.98812	1.76109
28.1	-0.997304	1.96796	-0.918845	0.345759	3.44682	-1.11071	6.7383	-1.90574
28.2	2.05085	2.57519	0.2833	2.12548	1.02294	0.067217	1.81083	1.7533
28.3	1.43526	-4.74604	-2.17595	1.46355	2.87102	1.8533	1.77067	-0.0810182
28.4	-0.397765	0.75148	4.51542	0.804066	1.66545	-1.24112	2.9498	0.528936
28.5	-0.397012	1.35977	-1.61156	-4.12099	0.460864	-0.0599485	2.29727	0.529522
28.6	0.824221	3.186	0.809698	0.11141	1.08624	-0.0992276	0.426616	1.75114
28.7	3.26355	-2.30871	2.00632	-0.540934	1.70853	4.7411	-2.65955	5.41093
28.8	0.821179	-2.30516	4.41971	0.0293345	2.93737	-1.40187	0.968	-1.30053
28.9	3.87249	0.746774	-4.1474	1.21027	-2.54548	1.61531	0.930402	-5.55796
29	5.08957	-1.08567	0.106988	-0.0479178	-1.92205	-0.859368	-2.15518	-1.87858
29.1	3.25646	0.133877	0.694376	-0.691583	2.35646	-2.71744	2.08312	1.79511
29.2	-0.401396	1.35059	3.10981	-1.33166	1.74621	1.52766	0.826242	0.585144
29.3	2.04625	0.735255	4.30097	0.470808	-0.0847519	1.49806	1.40222	1.81816
29.4	2.05071	3.77921	2.4411	4.1013	-1.30496	3.29964	-3.5094	3.05028
29.5	5.10438	-1.71976	0.585019	1.01976	4.79141	0.831248	2.56553	2.4522
29.6	-0.993934	0.108689	1.17178	2.82473	0.507149	2.63779	0.0935074	0.0274551
29.7	-0.982583	-0.505989	-0.0715536	2.18968	0.496771	2.61321	-2.9817	-1.17165
29.8	-0.971327	3.14821	0.517174	0.948779	1.70312	2.59028	1.26787	-0.537808
29.9	0.86887	1.3068	-0.724049	1.54219	-0.144427	5.0078	0.632821	1.92539
30	0.265968	2.51695	1.69627	-2.13117	-0.771515	4.37307	3.65931	0.726526
30.1	-1.55585	-3.59323	2.89306	3.35163	-2.00969	0.0822776	-0.0256227	1.97027
30.2	0.893363	-0.546179	3.47867	2.11894	1.02031	0.0692772	-1.87218	-2.88468
30.3	-1.54124	-1.16476	-2.03328	1.50097	0.383346	0.0571142	-0.664527	3.24662
30.4	0.296029	0.0459278	-3.26486	2.10617	-3.30339	0.655322	2.37189	2.65964
30.5	2.12826	4.30167	-0.224454	2.7126	-1.4973	-1.18614	-0.0835083	2.68452
30.6	-0.312814	0.0112009	0.372341	2.10073	0.912886	-1.80413	3.56535	3.92971
30.7	2.73715	1.82539	-2.68899	1.49249	2.09691	-2.42082	1.72113	0.295286
30.8	-0.927741	-0.63355	-2.08413	0.278069	-1.60107	2.45131	7.19941	-0.282325
30.9	-0.318753	0.569575	1.56998	0.897617	1.414	-4.27159	-0.745679	-0.2481
31	-3.98082	2.37877	0.340676	-2.14029	-0.456152	1.21351	1.08289	-0.212947
31.1	-0.320274	0.524664	1.55464	4.58595	-1.10415	3.02893	2.90977	2.26214
31.2	2.72162	3.55106	2.15834	-2.11346	3.73594	0.572141	1.68628	0.46513
31.3	1.4875	1.08269	3.37257	-1.48053	4.29749	0.558756	-0.142556	-0.10776
31.4	0.254023	4.71568	-0.901259	0.982472	3.638	1.15464	-1.96575	-0.0687041
31.5	2.6796	-0.196013	2.15243	0.393834	-1.28856	-1.90961	2.31412	0.581058
31.6	1.43995	-2.65998	-0.895309	4.07645	2.94094	1.12928	-1.94905	0.0109986
31.7	1.4202	2.80671	0.33334	-1.39271	-2.59354	-3.76483	4.77346	2.4917
31.8	-1.04061	1.55441	2.17149	-3.19097	-3.8482	0.496768	-0.71054	0.0903485
31.9	1.37939	3.35245	2.17891	-0.10624	0.998007	2.31077	2.96422	-0.476222
32	1.35358	1.48768	-2.68957	-3.12365	2.17721	2.90161	-0.683585	-1.041
32.1	0.716067	-4.03251	0.99007	0.573556	2.13579	0.442573	-0.0543034	0.834849
32.2	-1.14167	-4.66434	2.22537	2.43553	1.48606	-1.40168	-3.08317	-1.56083
32.3	0.66086	0.192304	0.411391	-0.582965	1.44884	2.8555	-0.616755	3.36552
32.4	1.84828	2.59991	0.432141	-1.76514	2.63272	2.83644	1.84636	-0.86397
32.5	-3.06581	-1.09502	2.28388	-1.11476	0.767111	-2.05997	-2.40104	2.23189
32.6	-0.0450548	3.75367	1.08487	2.58397	3.17502	0.371005	-0.541023	-0.166224
32.7	-4.34866	-2.38276	1.71907	2.00802	3.14078	-0.860509	3.14597	-2.55979
32.8	2.33048	3.07819	0.52426	-1.00502	-0.550214	-3.91785	-1.70951	0.53869
32.9	2.89787	0.601736	-0.666817	1.47617	0.645722	1.56846	1.98229	-2.46702
33	2.85353	-1.86945	2.41385	2.73323	0.621375	0.338065	-0.429515	2.45927
33.1	-1.45959	-0.0669361	0.00162374	3.98776	0.598683	0.940877	-2.83548	1.27757
33.2	2.1621	-0.706306	-2.4051	-2.68722	0.577638	2.76353	4.52028	0.0973409
33.3	1.50817	-3.17288	-0.538313	-0.813047	-1.27106	0.925629	-2.77142	0.747692
33.4	0.245889	-0.755792	2.54453	0.44688	2.98281	3.36121	0.92782	2.61521
33.5	-3.45254	2.26703	0.133653	3.53255	2.96129	2.74497	2.18168	1.42917
33.6	1.39335	3.45546	1.99573	1.12313	-3.15647	0.30254	1.60472	-4.63375
33.7	4.40106	4.03267	3.85386	-1.28293	-1.33433	3.35453	2.85901	2.72844
33.8	3.13542	-0.878083	0.220186	0.582416	-3.17337	3.96349	1.6725	2.75766
33.9	3.70248	0.929018	0.251736	3.66182	0.47984	-1.52414	-0.120847	4.00478
34	2.44028	0.904222	-0.327165	1.24549	-0.141682	-0.291613	1.13854	-2.06926
34.1	1.18185	0.270689	-0.905757	5.53914	2.89702	1.55029	1.1762	2.23258
34.2	0.537086	-0.97034	3.39385	-1.76303	2.88132	4.00037	-3.66405	1.64606
34.3	1.72429	3.27983	0.976666	0.702988	3.47572	1.5697	2.48071	0.449091
34.4	4.13012	0.205634	4.66064	3.77146	4.06916	-2.07352	-0.53308	1.08185
34.5	-0.17457	2.0166	-2.02943	-2.92456	1.00301	0.999847	-0.49253	1.71144
34.6	-2.63998	2.60563	2.26807	-0.46364	0.382003	-0.808641	4.42538	2.33789
34.7	-0.830809	0.755675	-0.151384	0.160571	-1.45726	1.65691	0.186709	-4.96554
34.8	2.19558	2.56907	-1.95762	2.61019	-0.244256	1.68079	2.05318	3.59696
34.9	-0.880311	2.55095	-1.32273	-1.65483	0.966073	1.09697	3.30539	0.555271
35	-0.90032	3.75371	-1.30033	1.403	0.95413	-0.703174	2.11526	-2.48233
35.1	2.1294	-2.9712	2.37897	-0.425784	1.55149	-0.668562	1.53637	-0.637836
35.2	-1.55319	0.684339	-0.657767	1.40498	2.14717	5.46518	-3.31048	-1.84761
35.3	0.869848	2.50477	-1.86073	-1.64834	-1.52706	-3.04566	0.997541	1.82105
35.4	-1.58918	-1.77445	-0.0141093	2.00923	1.51275	-0.562867	-0.191736	3.65126
35.5	-1.60365	0.0536826	-1.22147	-3.48892	-5.2099	0.696649	-0.160219	1.20774
35.6	0.821673	0.0504178	0.010953	-0.441856	-0.334496	2.56425	3.52856	-2.45222
35.7	-1.63499	-1.17088	-1.19959	0.767928	1.48209	-1.05903	0.501528	-2.44824
35.8	-0.427508	0.660409	-4.23846	-3.51422	2.07532	-1.62615	-1.30134	-0.616805
35.9	1.38812	-1.16904	1.87342	-1.08229	0.228245	-0.362896	1.16627	-0.620065
36	-2.28681	1.2747	1.26458	-1.09558	1.4335	-0.931641	-3.68935	-0.0153966
36.1	5.6315	0.0563973	-0.563771	0.71912	1.41696	2.15871	-1.21985	-0.0235142
36.2	3.77895	-1.76801	-1.77985	-3.56825	-1.64805	1.58375	-0.586022	2.40546
36.3	4.36989	2.50983	4.32246	1.90804	1.39088	-0.210436	-1.78427	-0.0502724
36.4	0.0825678	3.12179	1.87539	0.0558698	-3.50229	0.436918	3.72541	0.54566
36.5	2.5119	0.684834	-1.17731	1.25568	-1.67766	-0.747354	5.5639	1.74822
36.6	2.49844	2.52191	0.653322	0.623637	1.36381	0.508421	-2.35908	1.72691
36.7	-0.562619	1.30741	-0.56903	3.04153	-4.13613	0.540741	0.707153	-0.125597
36.8	-1.78724	0.0959241	3.69818	-1.25245	-3.52654	1.7908	-2.33213	-1.36661
36.9	2.4794	-0.502963	2.46867	2.9988	2.57076	1.20725	-2.31863	2.27095
37	0.641127	1.94838	1.85087	-0.68468	1.94999	-1.20637	1.35129	-0.807748
37.1	0.027019	-1.70238	2.45334	1.73716	2.55126	-3.0075	1.96314	-0.223623
37.2	-0.584819	0.141775	1.22496	2.93544	5.5917	2.50983	-3.52577	2.18693
37.3	0.025131	-1.0668	0.608475	0.473831	1.9203	1.30684	-2.9084	2.15209
37.4	2.46418	0.165493	2.43203	1.06694	4.3551	0.713812	1.36412	0.896295
37.5	-1.19799	1.39474	-0.626092	-1.9984	1.2988	1.33933	3.18713	-0.358457
37.6	-3.02258	1.40142	2.41923	0.431368	1.90851	4.40045	2.56559	1.43668
37.7	-2.40349	-1.64132	-2.46824	2.8577	2.51851	-2.30263	1.9435	1.39781
37.8	3.09339	-0.410523	0.58065	1.01249	3.12882	-2.89714	1.32103	0.748177
37.9	1.87323	-1.01215	2.40397	1.61148	1.3004	0.775562	1.30811	-0.510911
38	0.0469224	-2.22315	0.565131	4.64989	-1.74242	3.21935	1.90372	-0.548884
38.1	0.0547455	4.49402	1.77856	0.367027	3.75861	4.43678	0.0581605	1.85139
38.2	-2.3752	1.44088	0.550453	3.41143	0.103815	3.82069	-3.61381	-1.85124
38.3	0.0788307	-0.997516	1.76355	0.96383	3.77444	-2.89326	2.47685	-3.10805
38.4	-1.73903	4.4945	-0.0747596	-0.257774	0.731739	-2.27832	0.0186454	3.56396
38.5	4.37461	1.43799	-0.0804908	-0.255893	-1.08428	1.99264	-3.0446	3.51528
38.6	2.55057	2.65468	1.13294	-2.69145	0.153136	-1.0629	1.82497	-3.24058
38.7	3.7799	0.209541	-1.92461	0.976806	-2.87914	-1.06453	1.80723	4.65086
38.8	2.56881	0.207486	-0.708249	0.370999	-2.24606	3.20131	-1.25869	1.55131
38.9	1.36123	0.814557	0.505244	3.42612	0.215727	0.750895	2.99916	-0.322308
39	0.157126	0.810127	-1.33294	-2.66988	2.67319	-1.08542	1.15199	-3.41122
39.1	0.175995	-0.414189	-1.33882	1.00319	-1.58096	-2.91849	2.96803	-0.395935
39.2	1.41538	3.85139	4.14241	1.62114	-1.558	3.17855	0.513429	0.784841
39.3	0.214284	1.40115	-4.41204	3.45802	1.51413	0.11725	2.33321	1.35444
39.4	3.89442	-2.26366	-2.58445	2.24286	-1.51683	-2.9379	1.71178	0.704482
39.5	-1.57807	-1.04301	1.67786	1.03023	-1.49259	-1.10893	-1.34595	1.88623
39.6	2.71701	1.39505	-0.166441	-0.180089	2.80024	-1.11272	1.09152	-1.20127
39.7	1.51648	-5.31742	3.4799	-1.99813	2.81665	2.54206	-5.01078	-0.622638
39.8	2.75781	1.39848	-1.41816	-0.154707	2.22349	3.14096	1.70525	0.566207
39.9	0.94829	1.39459	0.39997	-1.97426	1.63156	0.690174	-1.34647	-3.12358
40	-0.857441	-1.04744	0.994204	1.08678	-3.2274	-1.14569	-0.732146	1.12247
40.1	-3.2693	-0.434969	-0.852523	0.482095	-0.150101	3.72962	-0.727322	2.31321
40.2	2.25025	-1.04228	2.18164	-0.732473	-1.3473	0.0591089	-0.721182	0.454775
40.3	1.66126	1.40122	-0.888314	-1.33634	0.506387	-4.82323	1.72507	2.26042
40.4	-4.41451	-0.427496	0.925199	-0.111298	0.526849	2.49944	0.508978	-1.42324
40.5	-4.38105	2.01645	-0.314154	0.499944	0.546892	3.71049	5.39362	2.82921
40.6	1.74938	1.40755	-0.941784	-3.76968	0.566469	1.8708	4.7815	0.97794
40.7	0.550176	2.02002	1.48014	1.1136	-1.85345	0.0352707	-1.92634	0.35197
40.8	-0.0374246	-0.416821	0.848205	-5.59968	2.43814	2.47222	1.13538	0.339023
40.9	0.595077	0.810248	0.217285	1.72289	1.84281	0.0270182	-0.0771629	-1.50112
41	-4.26192	1.4257	0.197271	-1.33635	-2.4102	1.85562	-0.0680546	3.98136
41.1	2.47536	0.820957	1.3969	-0.732542	1.88129	1.85216	-0.669164	3.35746
41.2	1.88177	0.827653	0.76518	1.08815	0.676244	-1.19909	1.77895	-0.311992
41.3	2.50839	1.44453	1.35467	1.07466	-2.3559	-3.02377	-1.87622	0.295981
41.4	-2.35437	-1.59784	3.1631	1.05998	2.54443	-0.575546	3.01107	1.51432
41.5	0.718802	0.244292	0.700479	4.09306	1.3373	1.86882	1.78976	2.12225
41.6	1.34646	0.863723	1.29231	2.24142	1.96155	2.48006	0.569439	0.901434
41.7	0.752938	5.14076	0.0547001	1.00273	-0.464404	3.09102	-0.0402788	-2.75433
41.8	4.42832	2.09267	4.30838	-0.233789	0.772723	1.87241	0.568955	0.30589
41.9	3.82757	-2.16856	-0.591322	2.19056	3.22664	1.26681	3.61404	-0.29706
42	-0.431059	2.11539	-0.601984	-0.267723	3.23653	-1.16607	-1.8855	-0.897589
42.1	-1.63308	2.73265	-0.00146961	-0.891521	2.63666	0.064988	1.16009	-2.71538
42.2	-0.394308	1.51973	-3.66891	2.14494	0.208819	-1.14487	-1.90014	6.44672
42.3	0.841389	-0.300311	-1.83988	2.12744	3.88345	0.696836	2.36018	-0.262095
42.4	2.07402	-2.11655	2.42602	0.891478	-1.59511	-2.34268	-0.0977684	0.359891
42.5	-0.964644	0.339086	1.80696	0.268802	0.864226	2.55087	-3.16321	-0.238507
42.6	-0.339428	-2.69797	1.19061	4.52651	-1.55896	2.55696	-1.95693	-0.225832
42.7	0.893714	0.977993	-0.642613	-0.369139	0.900874	-1.09531	0.463872	-0.823013
42.8	-0.924868	0.378141	1.18761	-0.375685	-1.52196	-1.08183	-1.39088	1.62943
42.9	0.918157	3.43757	1.18611	0.229	-0.891163	1.37045	0.414077	-0.191723
43	0.318185	1.00273	1.7954	-2.82448	2.17738	-0.45066	-2.66485	7.13619
43.1	5.20682	2.84029	-0.0345192	0.836862	-0.247941	-2.26859	1.57705	-2.62427
43.2	-0.280191	-1.42403	-0.0306725	3.27303	-0.229613	-2.25421	-1.50866	1.04791
43.3	0.340918	1.63627	0.58367	-0.3915	-3.2603	-0.41129	-0.322202	-0.776246
43.4	-2.08815	-0.188357	1.19742	0.22102	-0.187865	3.86606	4.51827	1.0602
43.5	2.80439	-0.790793	-0.0187348	-0.385786	3.48773	-0.40271	-2.8477	1.06219
43.6	5.2482	-2.61242	-0.0125554	-2.8194	-1.38107	1.43306	1.3844	1.67232
43.7	-5.11741	-1.38264	2.43283	0.240582	-0.143558	-0.394823	0.728619	-2.59843
43.8	1.6106	-0.766105	1.82461	5.12458	2.31	4.4864	0.0728443	2.28378
43.9	-0.820695	0.457765	-1.22162	-2.19529	2.92825	0.209855	-0.582717	-1.99162
44	-2.02745	-2.59027	-2.43291	0.255923	0.495186	-2.23094	-0.0183657	2.27612
44.1	-0.182985	-0.145835	0.625909	1.48318	-2.54423	-2.22996	1.76369	-4.44196
44.2	1.04806	-0.146624	-0.590258	4.5374	-0.701182	2.64679	-1.94595	-0.173275
44.3	-0.162438	-0.758562	0.634199	2.70755	0.526853	1.41409	0.44903	-0.793085
44.4	-1.37078	0.458523	1.85531	-1.55783	0.531267	3.83994	6.49775	1.63497
44.5	1.69122	2.28151	0.0241557	-0.937177	-1.29534	1.38051	-1.48949	-3.26081
44.6	-1.35065	-0.168768	0.0246229	2.12054	0.538342	4.41111	0.90523	-2.05132
44.7	1.71061	0.433137	-2.41523	0.902976	2.9763	-2.32281	0.856801	0.373426
44.8	4.15562	1.64219	0.636103	-0.923205	-1.29956	0.100227	0.199402	1.57209
44.9	2.32703	2.23779	3.0702	-1.52787	2.35807	-1.75239	1.37337	0.937493
45	0.501543	1.00186	-2.42878	0.305745	0.519077	3.10325	0.107015	0.302622
45.1	-0.711165	2.20637	1.22767	1.52379	1.73077	0.629665	4.33195	0.277365
45.2	-1.31244	2.18816	-2.44183	-3.36043	0.499349	-0.0123377	-2.42574	2.68996
45.3	1.13537	2.16925	2.43062	0.298928	0.488221	-1.87502	-1.85178	-1.00065
45.4	-0.690792	2.14978	-1.24491	-0.319927	-0.74395	1.75124	2.38093	0.802984
45.5	3.58307	1.52013	5.45061	-0.330662	-1.97509	-1.94904	-0.710219	0.163386
45.6	-1.90874	-0.328063	-1.89322	1.48496	0.453387	-3.20522	1.0844	3.79276
45.7	0.535647	-0.343461	0.531514	-5.85224	2.26609	-3.24155	3.48705	0.707404
45.8	-1.90428	0.251003	0.510459	2.06564	-2.63314	-0.23116	1.61864	-2.37198
45.9	1.14683	-0.374957	-2.56121	-1.62055	1.62256	-2.10663	1.58511	1.87173
46	0.531893	-0.389579	2.29808	2.01435	0.990989	-1.54111	-5.76336	0.00978937
46.1	2.35561	2.03528	-2.00023	3.2	-3.29863	-0.368548	3.97764	0.590959
46.2	0.515688	-4.08069	-1.41372	0.721876	0.955949	0.800225	2.11618	1.78137
46.3	0.507224	2.01083	4.048	2.51412	2.76247	2.5751	2.08981	1.7508
46.4	0.497457	-3.49444	4.00969	-4.84598	-0.313105	4.34522	-1.59284	-1.93711
46.5	-0.733045	5.64561	-0.907848	-0.608692	0.885219	0.0132698	-4.04655	0.481059
46.6	1.69614	-0.47566	-2.76814	1.17909	1.47114	1.17671	0.823736	1.67645
46.7	1.68034	-1.70636	-0.96739	2.35177	0.226485	1.72746	-1.02066	-2.6165
46.8	0.443961	-1.71464	3.26779	-1.35734	2.03292	1.66696	2.62848	0.417881
46.9	-2.01048	-2.94187	0.176835	-0.18234	-1.65201	3.43569	-0.434748	3.4482
47	-0.192794	-2.94668	1.3596	2.20886	-0.451575	-1.50618	0.778329	0.377124
47.1	0.400798	0.70745	0.710271	-2.11252	2.57594	0.269287	2.60065	0.972835
47.2	0.382468	-0.523246	-1.15754	-0.937933	0.110061	-0.397201	1.37242	0.350159
47.3	-0.246616	1.90729	-1.80225	2.06357	-0.521385	-2.28109	-0.461416	0.950662
47.4	4.00248	6.77221	2.43239	2.01081	1.89744	1.32744	0.149029	0.333117
47.5	-2.73324	3.09114	-2.48718	-0.479983	1.26305	1.2715	1.36958	0.329277
47.6	-3.96883	1.85633	1.74994	-1.13534	1.84968	1.21708	0.759847	2.15742
47.7	0.894519	-2.42487	-0.117789	2.48048	1.21588	-3.10371	0.762268	-0.283556
47.8	0.259577	1.22891	4.72671	0.603446	1.80305	1.12247	-4.11216	2.16103
47.9	0.234807	0.606914	-2.022	1.7812	-3.70818	0.464429	0.170338	-1.49396
48	1.42883	6.08324	-1.43855	0.520309	-1.28158	3.46857	1.39659	0.958413
48.1	0.180815	0.572884	-0.244397	-3.78382	0.53063	-0.237865	3.231	2.79877
48.2	1.37365	-1.26848	2.16917	1.67983	0.510188	2.16331	-1.64474	-3.28871
48.3	1.34407	1.16149	-2.73656	-0.180627	1.09971	1.51392	2.02623	-2.04475
48.4	-2.95418	-1.29191	-2.14225	5.28353	0.468726	2.08842	-4.67527	0.418453
48.5	0.682333	-3.13128	-0.326835	-3.28315	-0.160904	-0.993406	-0.9973	-0.16996
48.6	1.26247	3.56882	5.75612	2.19567	1.04004	-1.0169	-0.374936	-0.755345
48.7	1.23138	2.32825	2.68378	-0.868396	0.409512	1.4022	2.07575	-0.728148
48.8	-1.23896	0.479668	-2.81842	-0.873139	1.60963	1.38112	0.253646	1.12963
48.9	5.44144	-1.36599	0.839599	-0.263481	2.1978	-2.29474	2.09387	2.37515
49	3.57187	1.05948	0.225205	4.0081	-0.263665	-2.91088	2.10129	1.78995
49.1	-0.123404	-0.1791	0.224795	-1.48012	-0.280945	1.96563	-0.330236	1.81645
49.2	3.5055	1.63282	-0.382399	1.5836	-2.7369	1.95814	-0.927664	3.67268
49.3	1.02971	-0.827687	1.45354	-0.841869	5.78763	0.12505	1.52476	2.47676
49.4	-3.27036	-4.50332	1.45956	4.05903	-3.38727	1.95765	0.92345	-2.98493
49.5	-2.07411	0.974186	2.07833	2.24751	1.48038	-2.30737	-2.11575	-2.94811
49.6	-1.48974	-0.266517	-0.349896	-0.165789	-0.368667	0.756371	2.16793	0.746894
49.7	2.14256	-0.894991	-0.331421	3.52738	0.225141	5.03676	2.78454	1.38535
49.8	-0.939104	-5.18053	1.51901	-0.709443	-2.23068	2.60455	-3.30734	-2.24639
49.9	-4.01406	0.908415	2.75861	4.21205	1.41613	0.789833	5.24676	1.44518
50	0.844567	-0.331254	3.3885	-0.019049	2.61709	-0.408838	1.58897	-0.359194
50.1	-0.403002	-0.95818	-2.68768	0.0294745	-2.28139	-1.60262	0.377495	0.278041
50.2	2.62106	2.0753	2.8356	-1.13892	0.756999	0.257036	1.60758	-0.306479
50.3	1.37184	1.44514	2.25249	0.136305	-3.52712	-0.323852	1.0062	4.59687
50.4	1.95538	2.64647	-0.156856	-1.63779	0.734186	0.927631	1.62572	1.56278
50.5	2.53888	-2.25092	-2.55975	-0.967826	0.109576	0.349214	-2.02394	0.9726
50.6	4.34193	0.789342	4.79958	5.18967	1.92572	4.65156	-1.39778	0.382503
50.7	0.0452177	-2.2726	1.17018	-0.249462	0.69011	1.02009	-0.162699	0.402317
50.8	-2.41246	2.59956	-3.67052	1.63947	-0.54238	-5.04196	2.28988	-1.40812
50.9	-0.595761	0.146455	-0.574153	-2.5729	3.1062	0.494216	-2.57882	-1.9965
51	-1.83014	3.18729	0.68732	1.14939	4.30918	2.36181	-1.94953	2.90301
51.1	0.597603	8.66243	1.94654	-1.84362	-1.19674	1.17771	-3.75989	-0.744568
51.2	-3.68547	-0.505814	-2.28444	2.48531	0.0161423	-0.00340296	-1.29783	-2.5565
51.3	0.577647	-0.508295	1.41944	1.92644	0.617508	1.25732	2.37955	-1.92654
51.4	-1.87369	0.100365	2.6766	-0.462089	-1.22067	1.29644	1.17243	-0.688641
51.5	2.998	1.92874	0.882028	-1.62824	1.21361	-1.10314	-1.86069	-2.50235
51.6	-0.0655592	1.92574	-1.51942	-0.355212	1.20463	-0.448883	-0.618646	0.565144
51.7	1.14628	-1.73413	-0.868295	-0.916312	1.80597	1.42377	0.0121654	-0.032177
51.8	1.74701	0.712292	-0.219561	0.960154	-0.0323098	-4.02414	4.30121	1.20071
51.9	4.1767	-1.72254	1.6462	1.00096	-2.47614	2.73373	0.656132	0.601766
52	0.504857	-0.492517	-2.59044	-2.61968	-0.646352	-2.71676	0.677896	-1.21551
52.1	-0.720113	3.78529	-2.55178	1.69056	1.79013	-0.229847	0.0909901	1.84886
52.2	4.15524	-0.480377	-1.29502	-1.93751	4.22238	1.03236	-1.71306	-1.79996
52.3	-3.1737	0.141804	-0.651865	-2.51282	-0.0567051	0.462437	-1.07332	-1.78294
52.4	1.09722	0.154376	-2.45038	-1.87069	-1.88758	1.1126	2.61509	0.673183
52.5	3.53042	0.168368	-1.19801	-1.23303	1.77371	-2.50742	2.63888	4.34416
52.6	-1.35831	-0.425939	0.66022	-0.599812	-0.0590644	-0.0235935	0.224775	-1.13809
52.7	-0.749953	0.811609	-2.3646	1.85824	-1.88717	2.45442	-1.5736	-0.511717
52.8	-3.19198	2.65775	3.76142	-0.569619	-0.0520183	-3.60993	-0.928253	3.16242
52.9	1.68729	-0.98637	-1.71116	-1.77613	1.17094	1.31205	1.54612	3.78078
53	1.06867	-0.963838	0.752634	0.0656476	0.56342	-0.484146	3.40687	1.34937
53.1	2.28007	2.10815	2.60058	-1.75738	-0.651425	0.160991	2.82604	-1.68678
53.2	0.439947	-0.313115	3.22417	-0.530628	0.576374	-0.415935	1.02794	0.770994
53.3	-0.177425	-1.50974	-0.422819	1.9108	-1.85541	2.66539	-0.155837	3.22401
53.4	-0.794003	-1.48434	-2.23444	2.51602	4.86526	-0.358211	-1.33636	0.794192
53.5	1.63885	-0.849285	3.27341	1.28887	-0.0110147	0.281341	1.75444	-1.63084
53.6	2.23707	0.393977	3.89135	3.11113	-2.43698	4.57672	0.571528	3.26581
53.7	-0.215195	1.63434	0.238933	0.660028	0.0216048	1.54518	-2.4377	1.44533
53.8	1.60507	1.04248	2.08069	1.87095	0.647908	2.17664	4.92529	-2.2011
53.9	-5.11527	2.89016	1.47903	3.07833	-0.554388	-0.85306	0.689039	-0.352954
54	0.982031	-1.36409	-0.951499	0.0141674	-1.14266	-3.26844	-2.31882	-0.338111
54.1	-1.46938	-1.34257	2.71951	0.0041625	3.75984	2.24618	1.99665	1.5055
54.2	2.18144	2.33633	-3.98312	-1.22571	1.94727	0.431385	2.03561	0.905962
54.3	3.38599	-1.91995	-3.3561	-2.45329	1.35956	1.6675	-0.364326	-0.912463
54.4	-3.33851	-4.33983	-0.291909	-2.45887	-1.66427	4.72907	0.289274	-2.11813
54.5	-1.51315	1.17031	0.326709	-1.24461	0.197463	-0.143391	-0.887697	1.55587
54.6	-0.91081	1.18019	-0.275809	0.577525	-0.991791	-1.95871	-3.28204	3.39251
54.7	3.34898	-0.0311089	2.78101	-0.0422523	0.871365	-2.55224	-0.18423	2.78551
54.8	-1.54557	2.41677	-0.265979	6.04724	-1.53623	1.12241	-1.97093	-0.870154
54.9	-3.99096	2.419	0.961022	0.540337	0.940003	-0.0893412	-0.0962081	-2.69063
55	2.71521	0.590192	-1.47322	1.14272	0.363584	-0.080299	-0.664981	-2.07
55.1	0.872183	-1.2367	0.365205	1.13511	0.398981	0.537322	-1.23357	-1.45217
55.2	0.253004	-1.84215	0.98001	-1.31055	1.65465	-2.50594	1.24653	-1.44695
55.3	-2.19334	1.82018	1.59307	-0.0920597	-0.749907	-4.32483	-0.547873	0.385828
55.4	0.853895	-0.0140312	-0.234612	3.5637	-0.100429	1.17568	0.708419	2.21333
55.5	-0.981739	-0.62651	-0.839817	-1.32363	-1.28109	-1.87232	-0.47856	-2.67166
55.6	1.45578	1.19985	4.6529	2.33563	-1.23961	1.79181	1.99329	-2.06092
55.7	2.06066	-0.0274865	1.59753	1.7197	2.46051	-0.0401924	2.62881	4.03461
55.8	-0.382864	1.79508	-0.842731	-1.33376	2.49502	0.569307	-1.61722	-0.859154
55.9	3.27747	1.17385	-0.230149	-3.1616	2.52957	-1.26259	2.06945	-0.867079
56	3.88337	-0.0570167	0.990117	1.72119	-1.70407	0.566366	-0.351222	-0.267156
56.1	-3.43706	1.76229	0.987534	-1.9426	3.217	0.561214	0.888685	-2.71906
56.2	0.843794	-0.691039	-3.28422	0.497676	2.03084	4.21328	-0.925412	-0.289959
56.3	-1.58944	-1.31093	1.59772	2.32254	3.89559	-0.0698348	0.919645	-2.74547
56.4	0.861791	-2.53996	-0.847952	-2.56435	1.48813	-1.29683	-3.33933	0.899594
56.5	0.870957	1.11083	1.58829	-0.735379	-0.305179	-0.693128	-3.93424	0.87727
56.6	-0.337497	-2.56313	-2.07867	2.30828	0.953329	2.34744	2.17639	2.07291
56.7	2.11688	1.6964	-0.861256	-1.97233	-0.230219	-0.716351	2.1746	1.43545
56.8	3.95859	-2.58942	-2.6959	1.07109	0.417132	-1.33579	-0.878704	1.4076
56.9	-0.908559	0.449809	2.17942	2.27769	-3.81556	0.484432	4.60777	-1.0605
57	5.21142	1.65336	-3.32151	-3.22687	-0.114098	0.471416	0.324787	3.79207
57.1	-1.48337	1.63466	-2.71489	0.424067	-1.90877	1.06798	-0.293705	1.31704
57.2	3.42223	3.44489	0.328739	1.01735	-0.652269	-0.165865	0.306152	2.50457
57.3	0.393208	-0.236506	0.316968	-0.831273	-1.83838	1.04195	0.292822	-3.01816
57.4	2.8596	-1.47195	-0.914795	4.02918	-1.1941	3.46726	2.71636	0.00592852
57.5	-1.99434	0.953183	1.51389	-3.31675	-0.552439	1.01037	-2.7936	1.1943
57.6	0.479701	-2.72424	-0.330865	0.325537	-3.57196	-0.221394	-1.58722	1.1605
57.7	-1.92789	3.3613	1.48625	0.910161	0.120186	0.379466	2.05415	-0.702606
57.8	-1.89071	1.50779	-0.358887	-0.337133	3.80337	2.19978	-1.63011	3.53543
57.9	-2.46257	2.70649	0.23857	-0.363789	-2.27843	-1.46996	-3.47913	-1.38102
58	-4.86188	2.68315	2.66414	-1.00129	0.796242	-0.862801	0.162087	-1.40951
58.1	0.0610698	2.65963	0.816806	1.41025	0.814268	4.01289	1.35619	-0.218099
58.2	2.5357	-4.07125	1.41237	-5.93971	-0.998762	-2.70469	1.93747	0.361642
58.3	3.17643	-1.03298	2.00713	2.57772	-2.20017	-2.7001	1.9073	0.940669
58.4	1.98671	0.779681	-2.27681	4.37071	-0.352159	-0.864602	-1.17193	-3.35897
58.5	0.189482	-2.28927	1.3749	-2.37633	-0.948398	0.968959	0.0228771	2.71611
58.6	2.05401	0.13559	4.41006	0.0364781	-0.935226	0.971306	-1.22378	3.29193
58.7	0.25598	-2.93205	-2.31626	0.61579	1.51541	-1.46373	-3.07766	0.208662
58.8	-0.929271	0.103977	5.60518	0.584976	2.13051	-0.233917	0.559948	-2.86792
58.9	-6.99076	0.0855318	-1.12255	-1.27401	3.35282	-2.05381	0.532102	1.37909
59	0.373396	-1.76165	-1.12929	0.530349	-0.916274	3.44813	2.33394	-1.69878
59.1	1.01474	2.49288	-1.74543	-3.15528	1.52909	-0.205997	-1.35511	2.54688
59.2	2.26335	0.642128	-0.530823	1.09454	2.749	-2.02275	1.67078	-1.14211
59.3	-0.7601	0.624977	1.90106	-3.19899	3.96557	-0.786458	-2.62582	-2.99409
59.4	-0.12048	1.21838	-1.76929	0.444203	2.13021	1.05766	1.62301	-1.79323
59.5	-0.0933607	1.2017	-0.554416	2.86216	0.907469	2.89844	0.985883	0.625149
59.6	-1.89712	-1.25299	-3.6102	-1.43035	1.51563	2.90646	-2.69828	4.25864
59.7	1.17903	-0.0433292	0.0472239	1.60427	0.292676	-0.744188	1.5519	1.78793
59.8	-0.630528	1.77461	4.91674	5.24428	-4.58688	-0.119886	3.35491	2.98107
59.9	1.83007	-3.72712	3.67893	0.342374	1.51825	2.33164	2.10573	1.73326
60	3.6743	0.538912	3.05308	-0.889519	-2.14506	1.11882	2.07852	-2.56049
60.1	-1.19403	1.74868	-1.23027	2.15108	-1.53319	-0.70256	0.831821	-1.35777
60.2	1.87246	2.34722	-1.23718	2.13875	1.51623	0.526989	1.4167	-3.20599
60.3	-1.16604	-1.32284	1.80433	0.908757	2.73026	-0.0768144	1.39048	0.437346
60.4	1.28783	-1.32633	-0.0385221	-0.317023	-1.54585	1.14785	0.144568	1.02493
60.5	0.0769896	4.15877	-2.48786	5.16854	-0.935465	1.75815	-1.09919	-0.217599
60.6	-0.52303	-0.731856	-1.27441	0.279137	-1.54571	2.97468	-3.56033	-2.06711
60.7	1.92565	0.48552	-3.72243	-2.16007	-2.1547	1.13762	1.30002	4.62378
60.8	-2.33886	1.70131	-0.678426	3.33363	0.896031	0.521133	-1.16658	-0.893181
60.9	2.55029	1.69603	3.57846	3.32991	-3.98592	-0.706576	1.85905	2.13761
61	0.72169	-1.96687	1.11907	-0.331355	0.288056	3.55302	-2.43871	-2.1542
61.1	-1.104	1.08554	-0.116634	0.283587	2.72426	0.484228	1.80797	-0.949409
61.2	0.121961	-1.96475	-1.96034	-2.15087	1.49701	-1.97176	0.557839	-0.35639
61.3	-4.1429	-0.130266	-1.97189	-2.14113	-1.5572	-6.86486	-0.690505	-2.20314
61.4	-1.69264	0.481682	1.67424	-2.13113	-0.337285	-0.166067	0.501857	-0.387374
61.5	-0.467216	2.31235	-1.39488	-2.73078	0.270247	0.418949	-1.35774	0.20565
61.6	1.97486	-0.738183	0.419351	-0.890361	2.09572	-1.43919	0.443862	3.2369
61.7	1.36302	-1.34327	-0.209649	2.77535	1.47817	-3.29657	2.24087	3.21392
61.8	-1.0771	0.492165	0.991202	-0.273964	-0.358102	-3.32389	2.20414	1.97207
61.9	0.14588	0.494992	1.57927	-2.70821	1.46717	-1.52469	-2.1016	-2.3154
62	1.36619	-0.111669	-2.10266	0.349234	-0.980109	-1.56095	-1.52164	-1.10599
62.1	2.58383	2.94167	-4.55837	1.57041	-0.984373	-2.81907	-0.943584	0.101693
62.2	1.3598	1.72109	-2.13178	2.17837	1.4494	1.4108	-1.58683	0.0881907
62.3	0.137906	1.7228	3.33825	-1.48417	1.43829	1.36198	1.42908	0.685156
62.4	1.96678	-1.32386	0.870375	1.5666	0.206596	0.0918601	0.170213	3.72056
62.5	-1.08643	-2.53498	1.45584	-0.877579	2.63464	-1.17741	0.132798	-1.78594
62.6	1.35357	2.96369	-0.399045	-1.48884	0.178632	-1.83587	-2.95378	0.035965
62.7	2.56856	-1.30445	3.23728	-2.70987	0.77492	1.77392	1.28221	-1.19403
62.8	-2.92684	-0.0764141	-0.45074	-0.271209	1.97843	0.497491	0.0216801	2.45675
62.9	-2.31479	0.539396	2.57569	-3.32626	-0.480201	1.05194	-0.0171051	3.0519
63	-0.48553	2.98315	0.108372	2.76982	-0.496178	0.994831	-1.88519	-4.28048
63.1	-1.10008	-1.28528	1.3044	-0.903305	-3.562	3.37627	2.95763	0.596931
63.2	3.77306	-2.49668	-0.550673	1.52718	-1.74494	0.87466	-1.3552	3.63573
63.3	-1.12065	-1.26698	0.646649	-2.75552	-0.542504	0.816812	0.438295	1.79081
63.4	0.0916046	-1.86939	1.23185	1.50559	-0.563185	1.36876	-0.820002	-2.48914
63.5	-0.529003	1.7971	2.42564	-1.55975	1.85401	1.9197	-3.29465	-1.27265
63.6	0.0699196	1.79724	-0.0413778	0.867723	-2.44187	4.90884	2.77283	1.77086
63.7	-1.16276	-3.08127	0.545341	0.240743	-0.632892	-2.47313	0.902471	-1.28887
63.8	-1.78443	-2.46319	1.13101	-0.385765	0.561631	1.74536	-1.57293	-0.0740058
63.9	0.642609	-2.45705	-0.723279	5.08578	2.36246	2.29776	0.835603	-0.690487
64	3.06346	-0.0130349	1.08484	-0.429512	0.500241	-2.63772	2.63079	-0.0860017
64.1	4.86827	1.81516	-1.98836	0.16314	-0.749444	0.974202	1.37499	-0.0922659
64.2	-0.0391851	1.8092	-0.177253	1.36403	-2.60718	-1.51709	1.34254	2.34066
64.3	-1.27984	-2.46627	-0.808518	5.00134	1.63558	1.48588	0.09214	-3.76743
64.4	-1.29989	-1.24682	-0.828531	0.0949788	3.43042	0.216363	0.0653254	-0.716985
64.5	-1.93097	0.578663	-3.28719	-2.36244	0.95307	-1.04876	0.650003	-0.72115
64.6	0.48664	4.83824	2.79578	-0.54631	-3.34895	2.56871	0.625538	-0.11536
64.7	-0.76025	9.08801	1.55009	3.70584	-0.935555	-0.525819	2.4322	4.75776
64.8	2.26238	0.523312	-0.302438	-0.586069	-1.57593	-1.17267	3.62741	-1.35379
64.9	-1.42931	1.12047	-1.54103	0.00957937	3.2725	-0.596071	-0.0558576	0.474027
65	-2.066	-3.7726	-2.16676	-3.05318	0.184463	-1.84704	-0.0714169	1.07936
65.1	-2.7024	2.92786	-0.351469	-0.0111104	-2.2878	-0.0438362	-0.69474	-1.3646
65.2	-0.899464	0.46749	1.46103	-3.07116	-0.487002	1.14908	1.12416	-1.97387
65.3	0.899016	-3.20877	-2.21698	0.583491	0.0907184	1.1233	-1.32672	-1.36193
65.4	5.13201	-2.00103	5.08861	1.79339	-1.16187	-0.728465	1.71703	1.07858
65.5	-1.61969	0.422517	2.01491	-0.656032	2.46614	-2.57333	-3.16999	-0.753348
65.6	0.787414	-0.208734	-1.6615	1.779	3.0384	2.90563	-3.16741	-0.141952
65.7	0.750006	-1.44961	-1.67118	-0.0573815	-0.0487629	0.4502	1.71495	2.90794
65.8	-3.55619	0.359619	-3.50907	1.76997	2.96788	1.66134	-1.94707	0.464907
65.9	0.682061	-1.49426	2.58442	2.37586	0.491089	1.65381	1.71684	1.07641
66	2.47249	-0.296738	1.35002	-0.0664755	4.11704	1.64945	3.54592	-0.141477
66.1	1.82006	-0.322028	-1.10006	-1.28274	-1.40991	-1.40058	0.495062	0.473453
66.2	-3.0996	3.31028	-0.495061	-1.88516	-1.4375	-1.39285	-3.15787	-1.35062
66.3	-1.91232	1.44675	2.54927	-0.655584	-1.46423	0.446908	2.95392	4.14715
66.4	1.1016	2.63478	-2.94725	0.573034	0.339249	-1.37292	-0.70095	1.09886
66.5	-0.158846	-5.93628	-4.16285	0.581148	0.310901	-0.747845	1.14045	-2.55184
66.6	-0.19734	-0.466818	0.723321	4.24904	-5.81384	1.09767	-0.0693386	0.513236
66.7	0.983875	2.55219	0.723822	1.81344	0.879345	-1.93639	-3.71463	-0.0848416
66.8	3.9923	-1.75234	2.55567	-0.00630292	0.243503	1.13484	0.574999	-0.0705094
66.9	0.287954	-2.39035	1.33739	-1.21142	-0.999507	-2.50563	1.8083	0.554999
67	2.07918	-3.02746	0.12384	-4.85193	1.41983	-3.08863	-3.05751	-0.0388154
67.1	-1.62024	1.82416	-1.08496	-1.77694	1.39685	1.81869	-1.81553	1.80891
67.2	0.785862	-1.8704	0.759672	0.683184	0.155944	2.44942	1.25377	-0.00414114
67.3	4.40745	3.58862	0.773707	0.0906172	-2.91011	0.641214	1.87841	0.0170054
67.4	-2.95271	-0.109175	1.39987	-1.7194	3.78761	1.88662	3.11186	1.25899
67.5	0.678123	1.68846	2.63702	-0.476255	0.108126	-0.527587	-0.534888	1.28047
67.6	-1.79466	1.6538	3.8742	0.765214	-1.12327	1.94236	0.703692	1.91311
67.7	0.616569	-0.209279	1.45295	-1.04385	1.30809	0.140547	-1.71867	-0.502847
67.8	0.585236	-0.238464	-3.39994	-1.62932	-0.531767	2.00211	-2.91682	-0.473749
67.9	0.555202	-0.266492	3.95428	2.66475	-2.9759	0.20286	-0.45425	-2.88243
68	-1.91252	0.316578	2.15018	3.29217	0.0743221	0.847529	-0.435759	-2.84603
68.1	-0.715599	0.90008	0.9618	0.869978	8.60788	2.10201	2.63118	0.24021
68.2	-0.739292	-2.78392	1.6073	1.50164	0.0531355	2.13587	0.204073	-0.337158
68.3	2.89685	0.85838	-0.795048	1.52258	-3.60525	-2.09721	-0.389274	1.52652
68.4	-2.61901	-0.382346	-2.5809	3.98273	-2.98681	2.2158	0.847432	0.338675
68.5	-1.41527	-0.398803	-1.92244	-1.48849	3.72914	-2.01507	-0.967431	0.373436
68.6	-1.43193	0.197015	1.78504	-0.851179	4.33552	2.90963	0.879369	0.408664
68.7	2.21141	3.84307	-2.44015	-1.43437	1.89315	3.55719	1.50262	-3.82401
68.8	-0.248428	3.82622	-1.77782	0.422867	0.67615	-1.8933	2.73405	1.7079
68.9	1.56627	1.37332	-0.506054	1.05717	0.681912	-0.625267	-0.305486	2.35097
69	2.76901	1.36722	-1.67504	1.69047	-3.57981	-2.40809	3.36794	2.38304
69.1	-0.29747	-1.07475	1.42704	-4.99415	-2.95449	-2.35796	-0.283036	-1.85323
69.2	-1.52717	-1.06964	0.254962	2.35888	-1.1104	0.130949	-2.09759	-0.593519
69.3	-0.313949	-1.67092	-0.30511	-4.32666	0.120687	2.61458	-2.07934	1.27323
69.4	-0.321198	-2.87741	-0.254642	-1.24284	-1.08936	-2.22419	1.59724	0.696935
69.5	-0.936856	1.40948	-0.814534	1.22524	3.19096	-3.39555	0.998227	0.121233
69.6	-0.330579	2.03259	-1.98378	-1.18957	0.146038	-1.51672	-4.4776	-1.67349
69.7	0.885353	-2.2203	0.506874	1.27826	-5.33178	-0.252383	6.52062	0.19312
69.8	1.49009	0.245707	4.8208	-1.13694	-1.04289	-0.211262	1.64372	-1.60316
69.9	0.874988	-2.16789	-3.67965	3.15972	2.62744	-0.7814	-2.00379	-0.347878
70	2.70087	3.35309	1.85961	1.35017	0.192593	-0.742296	0.453679	0.904117
70.1	-2.18337	0.329562	0.679103	1.98284	0.810799	-0.0953129	-6.2396	3.37224
70.2	3.91811	0.973229	0.108928	2.61376	2.03687	-3.71974	-0.724306	2.17595
70.3	2.08125	-0.211081	0.14778	-2.24495	1.43047	4.85596	1.12196	-2.67759
70.4	-2.80031	2.87743	0.79436	-1.60713	-0.395113	-0.611542	0.526078	-0.815538
70.5	2.08417	-1.35524	-1.00132	1.46746	0.830716	4.29545	-2.50701	1.04151
70.6	-2.18681	-2.52912	-0.356429	0.8764	1.44343	0.0444425	-0.0457503	-0.764938
70.7	-0.961232	1.17873	0.285159	-3.3731	0.834509	-3.5903	-0.0277335	-1.95944
70.8	-2.78644	3.05117	0.313636	-1.51794	0.835568	-1.7319	-0.00904264	1.11528
70.9	-0.339432	-0.566927	-0.87954	-0.27755	-5.26183	3.16982	-3.03829	-4.35393
71	2.71285	-0.518689	-2.07237	-2.69948	0.846783	0.743205	-1.18265	1.16173
71.1	2.10103	3.18838	-0.216091	2.80864	-1.59413	0.149104	2.49958	-1.26173
71.2	1.49094	-1.64815	0.415012	-0.232164	2.0663	1.99369	1.29766	0.58632
71.3	-3.38561	3.28085	-0.786384	-2.04907	-3.42779	2.00394	3.14793	1.20966
71.4	0.28446	-2.77556	-2.59707	-0.81536	5.11204	1.40303	-1.71157	4.26914
71.5	-2.14979	1.54534	2.30119	2.8531	1.4388	-1.63697	1.36638	-1.21557
71.6	-1.53005	2.19852	-1.34859	-2.02401	-1.61858	2.64477	2.00032	-0.593674
71.7	0.918182	1.62995	0.494772	-0.186053	-0.402938	2.03886	-0.414682	3.07388
71.8	2.14261	-1.98734	-1.32565	0.426975	-2.8495	-0.396172	0.224743	2.46402
71.9	-0.90297	-0.720759	3.56327	1.03695	0.195259	-4.65658	-0.355846	-2.41483
72	0.936204	-0.0679503	0.514498	4.08274	-1.03548	-0.372896	-0.324862	-1.18854
72.1	4.60181	0.581809	0.51937	1.023	-1.65515	-2.19591	0.316364	-0.576415
72.2	-2.10464	-0.60084	-1.91581	0.406236	-2.88432	2.08158	0.956713	-1.79672
72.3	0.959091	-1.78312	-0.688621	-2.04058	0.156337	-1.57653	1.59604	-2.40687
72.4	-2.68945	-1.13585	1.75478	-2.65533	1.97073	-5.22765	0.404962	-1.18858
72.5	-2.0615	-4.15042	0.534093	0.997333	0.122468	-4.60341	1.04548	-1.19414
72.6	0.395492	-1.06365	-0.684812	2.20173	-0.50305	5.16572	0.46505	3.06668
72.7	-0.200107	-0.424109	-3.73101	1.57252	0.0918433	-2.76718	-0.724424	0.61009
72.8	0.425971	2.04118	1.76487	-1.49635	1.29509	0.291155	1.13651	-3.67261
72.9	-1.99688	-3.42745	1.15195	-3.34156	-0.552874	-0.314962	-1.2754	-0.0218986
73	1.68362	-3.39994	1.14957	0.912487	1.87108	0.90949	-1.24475	2.40024
73.1	1.69942	-2.76523	-1.90189	1.49782	2.46116	-1.52683	0.613618	3.59625
73.2	-1.33245	2.1339	1.14984	-2.18787	-1.82748	2.13931	2.46665	-1.91914
73.3	-1.91815	1.53297	2.36597	0.229668	-1.229	0.920398	0.0459447	-2.54734
73.4	-0.0624495	0.320853	1.1403	0.201973	1.19829	3.36247	-0.542764	4.1411
73.5	-0.0384198	0.937886	-0.693146	-2.87573	-1.25633	2.75099	-1.74235	0.449134
73.6	-1.23272	0.331828	2.96422	-2.29007	-2.48552	-0.908006	0.716382	1.03138
73.7	2.45452	0.334416	-5.5812	0.732298	7.87416	3.36685	-1.71052	-0.217982
73.8	2.47716	1.55433	1.13326	0.698889	-0.077643	-3.95205	1.35211	-2.68548
73.9	1.28143	-0.27885	-0.702888	1.27437	2.96334	0.938392	-2.30172	-2.10033
74	0.698921	-2.11021	1.12219	-1.81053	-0.707244	1.55074	-0.463919	-0.297578
74.1	-1.10088	1.54806	1.72319	1.81727	-4.36882	3.38106	-1.07225	-2.15737
74.2	-2.89624	-0.290327	0.492759	-0.660174	1.12471	-0.89014	6.24366	1.47389
74.3	2.01981	6.40969	-0.736269	2.35452	-2.53719	-1.49489	-0.482978	1.43924
74.4	0.829131	-0.929403	-3.79321	-1.95411	-0.0926608	1.55954	0.116673	2.62408
74.5	0.250862	3.32964	0.471651	1.67219	-0.699952	-2.70955	-2.94739	-1.68111
74.6	3.33229	0.871576	-0.76093	-1.41606	1.13483	2.78517	-0.5217	-2.92886
74.7	3.35878	-3.41211	-0.163147	-2.05921	-0.0807966	0.341629	-0.543841	0.0943527
74.8	0.33624	-0.37151	-1.39716	-3.31067	3.58584	2.17049	-2.39905	-1.76611
74.9	-1.46114	-0.386755	1.63816	1.53813	0.539868	-0.273183	1.23348	0.0359881
75	-2.64561	-2.23219	4.05637	0.890077	-0.059131	-1.49321	-3.07147	3.05457
75.1	2.26924	-0.416311	-0.238742	2.68299	-0.0452309	-0.272529	0.555388	2.40946
75.2	1.68598	0.175837	-0.868107	2.644	0.58035	-1.49386	-1.92572	-1.28216
75.3	0.493339	2.59559	-0.887715	2.60617	-0.0127866	-0.884098	-5.01478	0.522341
75.4	-1.91732	0.132254	0.920741	1.95985	-4.26119	-2.10533	3.48457	-0.724361
75.5	-1.27559	-0.497119	-2.15355	-1.12294	0.0372542	-2.71488	-3.27926	-0.747941
75.6	-0.0267528	-2.3448	-0.954727	-1.14964	0.0608154	-8.20159	2.16277	0.449274
75.7	-2.44041	0.689136	0.240496	1.8737	1.91538	2.78537	-4.60312	-2.01301
75.8	-3.63155	0.668406	-5.27511	-1.81491	-1.10992	-0.27405	1.44723	2.23819
75.9	0.665375	-3.62028	0.804177	-0.00726602	-1.07869	0.330647	-1.66216	-0.834617
76	-1.75565	0.63625	2.60198	-3.07994	-2.26532	0.323979	0.111412	1.58779
76.1	-0.515749	0.00671086	2.56577	0.561933	1.42994	-0.292789	1.27091	-0.87116
76.2	-0.500227	1.20816	0.0894857	-1.89968	2.68033	1.53029	0.598474	-0.884782
76.3	3.781	-0.640839	-0.553727	0.522785	0.27111	1.52017	0.537122	5.20058
76.4	3.7829	-1.26591	-2.41611	1.11242	0.916546	-0.929219	0.47628	-0.309796
76.5	-1.70563	0.550017	4.87049	0.482635	0.342223	3.33322	-0.193373	0.899598
76.6	-1.69832	1.14356	-4.32134	-1.97386	4.64794	0.270036	0.968785	-0.940511
76.7	-0.474349	-2.53159	0.528599	-0.15599	-3.24907	0.871173	3.9595	2.71228
76.8	-0.475079	-0.101272	-1.9485	1.65949	3.50397	-2.1876	0.239021	-0.347863
76.9	-1.69797	2.32488	-1.98196	1.64336	-1.34135	-1.58207	0.186717	-0.35165
77	-3.53078	0.47858	1.64306	-2.02999	-1.29903	0.241413	-1.08233	-4.62212
77.1	1.95447	-1.36355	0.383093	-1.42664	-1.25687	-0.378149	0.702793	3.92205
77.2	-1.71976	0.456902	-0.264225	1.00591	-1.82484	2.05176	1.26806	-0.353986
77.3	3.14742	-1.38436	1.52932	0.995719	-0.562921	-0.40159	2.44538	-2.18125
77.4	-2.97272	0.436789	1.49079	2.20597	-0.523673	0.198201	-3.69289	-2.17445
77.5	1.28284	-2.01367	-1.5955	-0.853576	1.95362	2.62548	4.81878	-2.77624
77.6	1.86949	1.02864	-1.62583	0.971616	0.156734	0.779113	0.512829	0.892499
77.7	-0.595494	4.06507	3.22309	1.57433	1.41085	0.765125	-1.95135	3.33557
77.8	-1.22786	1.60788	-1.08255	0.34718	0.831691	0.750657	1.08107	2.11647
77.9	-0.0310229	2.20439	1.32891	3.39112	-4.0163	-0.483858	1.06274	0.291126
78	-1.27667	-0.858636	-1.75067	-0.887669	2.11881	1.33217	0.438601	-0.31013
78.1	-1.30122	3.40148	-1.16404	-2.71875	-1.51628	-3.56326	-0.180567	2.13949
78.2	-4.37499	-0.273464	0.642559	0.332035	0.951103	3.13556	-1.40466	-2.12193
78.3	1.09358	-2.72144	2.44727	-0.281451	-4.51539	1.89379	1.64536	-3.32514
78.4	1.0636	-6.38365	-3.06672	0.326032	-0.217495	-3.6143	1.64379	2.79189
78.5	-0.185554	0.327698	1.18804	-4.55513	0.410953	1.8635	0.425666	-0.248543
78.6	-0.821961	0.929078	2.38742	0.329549	-0.183826	1.84233	2.26136	-0.233341
78.7	2.20213	-2.12822	1.75694	-1.50252	0.439494	-4.27662	-0.17244	-0.827045
78.8	1.56278	-0.300327	-1.30958	-0.891808	-0.770249	-3.67658	1.05918	-0.808971
78.9	1.53577	0.915479	0.509593	-0.282099	-0.150979	0.580394	-1.36826	-4.44865
79	1.51029	0.301005	-1.33171	1.54613	2.29363	1.17003	1.08869	1.06571
79.1	6.97415	3.3476	1.71016	0.93199	2.90148	1.14834	0.493302	0.472145
79.2	-1.59531	1.51155	-0.740243	-0.290392	-1.3726	-1.31258	0.509803	-0.119806
79.3	-1.60963	1.50977	3.52281	0.928982	1.67593	-2.54931	-1.30222	1.72881
79.4	5.08504	-3.36851	-0.148001	0.317118	-2.60139	0.484431	-3.11009	2.9644
79.5	-2.86564	-1.52844	-2.59084	-2.12232	-2.60482	-1.36601	-0.0361225	-1.89956
79.6	0.786579	0.919097	1.6795	2.76044	2.87675	1.05522	-3.67548	3.00238
79.7	-2.8834	0.924109	-1.37449	-3.34149	-0.191645	-0.796757	-4.25915	3.01683
79.8	-2.27584	0.320522	1.06634	0.934842	-1.42726	1.01329	0.645555	-3.06609
79.9	-4.10646	0.328848	-3.81366	-0.284578	-1.44335	1.60011	-0.557695	-5.47834
80	-1.0536	-0.881553	-1.36612	-3.33027	3.41626	-3.30212	0.679418	0.0409711
80.1	1.99491	-2.6987	-0.142112	-0.881563	-3.93089	-2.7071	-1.74568	1.28121
80.2	-2.27798	-0.243553	-0.139269	0.953233	-0.290093	0.325495	1.32026	2.51911
80.3	2.60533	-0.841641	-0.745533	-2.09277	-0.926686	3.96154	0.110192	0.0961196
80.4	1.3829	1.61044	2.30844	4.01439	1.48485	-2.16585	6.21753	-0.492874
80.5	1.99344	0.399321	0.478883	2.79352	0.840999	2.08425	1.3352	-1.69055
80.6	-1.66434	-0.19964	2.31183	1.57616	-2.24236	-0.991446	-2.92987	-0.446993
80.7	3.83229	-0.797553	2.92191	0.972006	-3.49204	0.206709	0.737981	2.01346
80.8	0.172644	2.26392	-2.56653	-0.239703	-3.52125	0.792332	0.128005	1.42011
80.9	2.00861	1.05068	1.1021	-0.83826	-1.11278	1.3765	-3.53179	-1.00149
81	0.792666	-3.20941	1.10483	1.00437	1.28963	-1.08945	0.130383	1.45947
81.1	-2.24974	-3.19341	-0.721893	3.45405	-0.582106	1.32733	0.1246	-2.18219
81.2	-1.0176	-3.17807	-0.716019	-2.63674	3.0366	0.0807944	1.94593	2.10972
81.3	0.822025	1.71455	-2.53973	-1.3977	2.98891	-1.77296	0.712895	-0.924242
81.4	-1.00034	4.15776	2.95668	-2.59932	-1.93722	-2.4034	-6.61702	-1.51365
81.5	0.229699	2.32702	-0.0948619	1.08017	0.462876	-0.593407	0.0900821	2.77554
81.6	-1.59151	2.32815	-4.36057	-0.124942	2.85779	3.04248	0.684892	0.958119
81.7	-1.58012	-0.110774	-0.691989	-0.107554	0.979448	-0.0357434	0.0576964	-2.07591
81.8	-0.959407	-0.106999	-3.12919	-1.91885	0.324129	-1.27829	-3.61805	0.383055
81.9	0.269316	1.7248	1.1445	1.76171	-3.37874	1.75014	0.639377	-4.4806
82	0.275477	0.50299	-2.51828	2.38681	-0.976878	1.11436	-0.599988	-1.4088
82.1	1.50032	0.501801	-2.51665	-1.86671	1.42015	-0.739332	0.601643	2.26564
82.2	0.892589	1.10895	-0.0774268	3.03496	-1.6753	-1.97924	-1.85786	3.49278
82.3	-0.934463	-0.725583	3.57504	-1.82852	2.55235	2.27141	-0.0443576	-3.2102
82.4	-0.929786	-1.3385	-3.14684	-0.584415	2.50345	-0.193181	2.37536	-1.36445
82.5	-3.36534	-4.39069	2.33818	3.09661	1.23529	-2.65248	1.74173	1.0863
82.6	-1.52925	1.70782	1.10378	-2.3755	3.62836	0.990995	1.71947	-1.34692
82.7	-0.308068	2.91466	2.30952	1.91949	2.35849	3.40821	-0.741084	-1.94722
82.8	1.51889	-0.150694	1.68246	1.93792	-0.73771	3.3821	0.462582	2.33056
82.9	2.12111	-3.82122	-0.163859	-1.70207	-0.168785	1.52721	3.49408	1.72081
83	-3.98679	-0.168938	-2.61713	-4.11528	-2.64921	0.286121	1.64268	-1.32776
83.1	-0.938124	0.425934	4.68962	-2.2555	-1.46572	-3.3911	-1.42331	-3.15183
83.2	-3.99479	-3.25004	-3.26244	-2.2288	-3.94248	0.256286	2.22534	0.51442
83.3	2.09891	-5.09088	-2.05301	-0.98296	-2.75516	-0.371418	4.64876	1.12361
83.4	0.251842	-5.70996	4.64143	0.260008	-1.5695	-4.6559	-3.9064	0.511037
83.5	0.845435	-1.45132	2.78599	2.71956	-1.60505	0.214707	0.971621	-1.93052
83.6	-1.00307	-2.08053	-0.894984	-0.923758	0.799077	0.198024	-0.865359	-1.92912
83.7	-0.410822	-0.880532	-1.51969	0.92722	2.58927	-1.0377	-2.08695	-0.709064
83.8	0.788164	1.53543	-0.923152	-0.274884	2.54717	-1.66073	-2.69436	2.33701
83.9	6.2513	1.50657	-1.5466	1.57342	-2.98211	2.59587	-0.24978	2.32757
84	-1.10265	3.30608	2.10025	0.368556	0.0364739	-2.30172	0.362756	1.09798
84.1	3.75141	3.27191	0.862903	-1.44446	0.000748895	-4.1403	0.36633	-1.95901
84.2	-0.551692	-0.421386	-0.980506	0.403796	1.79479	-1.7064	-2.67687	-0.132432
84.3	0.640252	1.37981	-1.59932	-2.02064	0.536987	0.113607	-1.44391	1.08045
84.4	-1.8298	2.56725	-2.2153	4.09531	-4.37642	1.93072	-0.821369	0.461548
84.5	-1.85696	1.31299	-2.82824	1.66172	-0.133602	-0.523212	-1.41795	-0.765782
84.6	0.554009	0.0609607	-2.21851	-2.59735	0.442495	-0.532378	-0.79235	0.448517
84.7	0.520315	2.4698	-0.388407	1.07754	0.407861	0.678934	-0.776349	-0.168543
84.8	1.09562	0.605762	0.220785	-2.57311	0.373484	3.71811	1.67983	-3.22293
84.9	-0.76992	4.23345	2.05061	-0.730174	-0.270338	0.0451829	2.91276	1.04619
85	2.24555	-3.12105	-0.388928	1.71745	-0.912625	-0.570471	2.3151	-2.00967
85.1	-2.67225	-0.704422	1.44712	-0.109472	-0.333826	1.2554	-0.109507	2.25794
85.2	0.955766	-2.5601	-3.42512	-1.32455	-0.365567	0.639961	1.74	1.02991
85.3	-4.5698	2.90565	-0.358397	-2.53876	4.48109	0.027049	2.36731	1.63422
85.4	0.281271	-3.22371	-1.56335	-1.92293	1.39183	2.46544	1.77481	-2.63993
85.5	0.244944	0.416078	0.89521	0.519341	0.138414	0.632089	-3.0838	-2.6367
85.6	-2.83969	-2.65741	0.912634	2.9553	-0.50215	-2.41581	1.82414	-0.803558
85.7	-1.03975	1.59333	2.15233	1.72657	-1.14073	-1.79788	-0.593812	1.63631
85.8	0.757224	-0.260586	0.953414	-3.76933	0.661759	1.25907	-3.61611	-3.24502
85.9	-0.497334	-3.9387	0.369405	-0.109612	-0.58713	0.652758	0.685027	2.85927
86	-2.35829	-1.51059	2.83794	2.32179	-0.61293	-1.78038	1.3195	2.24464
86.1	-1.77565	-2.13455	-0.183582	4.13705	-2.46653	0.670395	0.123641	-1.41715
86.2	-1.80293	-1.53633	0.46178	-2.58917	-1.87583	-0.541081	-1.06983	1.02606
86.3	2.43905	1.50115	-0.111435	-0.157191	2.9838	0.689884	-0.431784	2.24512
86.4	1.18598	5.14387	2.97695	1.04911	1.7385	0.699853	-2.23409	2.24241
86.5	-0.67314	-0.3652	3.62204	2.86136	1.7176	0.100876	-0.984331	-0.808929
86.6	1.74093	-0.373865	-0.000803528	-4.47753	-1.34935	1.33308	0.872299	-1.41518
86.7	-2.55569	-0.99039	1.87249	0.391811	-0.139069	-0.485108	-3.37266	-1.41044
86.8	-0.135185	0.22552	-1.13501	-0.847137	0.462217	2.57905	0.926751	-0.795956
86.9	0.452719	0.221563	1.35174	-3.30425	-0.153873	-3.50836	-0.880427	2.2562
87	1.04094	3.2684	0.785199	-2.70887	1.06391	-0.43685	1.58357	-2.62463
87.1	1.01982	0.213769	-2.21902	-1.50588	-4.42443	0.190182	0.383596	-2.61813
87.2	3.43942	0.825692	1.48984	2.13277	2.9064	0.206782	2.23414	0.436717
87.3	-0.851155	-3.43958	-2.1259	0.885403	-3.18798	0.833566	2.25119	-1.39286
87.4	2.79543	-0.37749	-0.856916	1.4691	-1.33965	-0.369729	-0.171387	1.04895
87.5	3.38799	0.851144	-2.63978	-2.21708	1.72851	-0.350773	-0.760491	0.436605
87.6	-0.896604	2.68882	-0.761442	0.810912	-0.693128	-0.941265	-6.22684	1.04436
87.7	-3.95116	0.256262	-3.15598	2.61313	-2.49623	1.51847	-0.0975133	-0.179013
87.8	2.14867	-2.77957	-1.88834	-0.466336	-1.85281	1.5347	2.9706	2.86746
87.9	-0.297796	-1.53957	-0.624369	-2.32013	2.45167	-1.49747	1.15431	-0.800173
88	-0.907816	2.13839	1.24553	-1.12133	0.0440607	-1.47452	0.5608	-0.802881
88.1	0.924683	1.54212	-1.15796	0.685075	-2.35534	-0.841555	-3.08053	1.02271
88.2	-0.902649	-2.71027	-1.72902	1.26873	-2.30782	-2.03889	-3.05641	1.01438
88.3	5.20256	0.363794	1.96755	-2.41651	2.62045	-0.185022	0.0161416	-4.48276
88.4	-0.287267	-0.225828	-2.27174	-2.43534	2.66356	1.05545	0.643473	-0.214162
88.5	-3.32483	-1.42327	2.64173	0.59539	3.92838	2.2933	-1.16948	-0.833082
88.6	1.57279	-3.22739	-2.21229	0.572409	1.53427	-6.83725	0.0698488	1.59691
88.7	-3.29279	1.07026	-2.79028	-3.10778	5.24415	-0.706292	2.52616	-0.856881
88.8	-2.04878	-0.737317	2.72843	0.537678	-1.41745	2.36344	-2.94914	-1.47747
88.9	1.63417	4.16668	-1.5217	2.95793	0.472	-1.89022	1.95211	-0.268372
89	-1.39491	2.35449	1.55156	-1.94194	-0.0802169	-0.0383368	0.746174	-0.281826
89.1	-0.147241	-0.672829	-4.52943	1.09629	-1.85009	2.41919	1.37187	-0.295821
89.2	-1.94833	-0.644589	2.81419	-1.96728	1.87171	-3.66508	-0.442639	-2.74926
89.3	-1.30447	1.21361	-0.834059	4.73286	0.708363	1.84747	3.84398	-2.75926
89.4	-1.87905	-0.589651	-0.208698	-0.163782	1.98623	-3.01698	-1.63378	-0.940302
89.5	3.03741	-2.99839	-2.63512	4.70694	-1.00706	0.0546602	-0.393436	0.874839
89.6	0.0194147	-1.13353	1.64871	1.64308	0.273144	2.51027	-0.984752	2.68625
89.7	-1.16153	-4.14988	0.434609	-0.193455	-2.71827	-1.13667	0.864131	-2.21318
89.8	-1.11891	2.59604	-3.21758	-2.6344	-3.26574	-0.508342	-1.55882	1.43356
89.9	1.36423	0.182627	-0.766361	1.02854	0.454904	-0.491102	-1.53796	1.41461
90	0.795212	-1.61604	2.89832	-2.02149	-0.711217	-1.08363	-4.56592	-0.433463
90.1	-0.990818	0.247423	2.89619	0.423659	0.562387	3.81274	1.55826	-0.448489
90.2	-2.1624	2.71684	-1.37513	1.64572	-0.607217	0.16296	2.18237	-1.68276
90.3	0.93749	-0.306625	2.28782	-0.182267	2.49193	3.8374	-1.46332	5.01239
90.4	0.983104	-0.275722	-0.154759	-1.39592	-1.12408	2.01681	-1.44369	-1.71982
90.5	2.24839	4.02289	-5.03211	-3.21604	-1.68604	-0.409919	-2.64406	0.70784
90.6	-0.756981	2.21493	-0.754135	-1.98304	-0.419576	0.216826	7.13272	0.691969
90.7	1.73116	-3.2486	-0.143623	5.95541	-3.42586	-2.20654	-0.793296	3.11541
90.8	-0.664002	1.05385	0.465298	1.07408	-0.330808	0.862476	-0.777675	3.0954
90.9	3.04241	-1.97013	1.68244	1.08093	-3.95122	2.70574	-0.153257	-1.19246
91	1.25286	1.71799	-0.761613	-2.57032	-0.859321	-0.942575	3.51761	-1.20321
91.1	-2.36353	-0.699902	2.28658	-4.99455	-0.824383	-2.75475	1.08263	-1.21355
91.2	2.56228	-1.28508	1.06015	-3.14547	-0.181884	0.314149	-1.95848	0.605728
91.3	-3.49874	-1.26078	-1.38373	4.18783	-2.5915	0.937414	-3.7754	-4.28551
91.4	-2.23254	1.81072	0.444977	0.531221	-0.730091	-1.48989	1.7268	-1.24004
91.5	2.68781	-3.05202	5.3182	-0.679218	-1.3132	-2.08377	-0.710187	-0.0295509
91.6	-0.330203	-3.02857	0.425154	-1.88745	-2.50657	-2.6772	1.12417	-2.47971
91.7	-2.73441	-4.22615	3.46781	0.564856	1.78852	0.388206	-0.0956609	-3.09569
91.8	2.18113	-0.544939	-2.03286	3.62157	-0.0239329	-0.82161	-0.0954622	3.60647
91.9	0.377673	0.6884	-3.86508	-0.0355659	0.604785	1.01875	-1.92642	0.539317
92	-1.42422	1.91776	-0.81678	-0.0276318	1.23101	-1.41386	-1.31673	-2.52182
92.1	-1.39532	-1.12501	0.395044	2.4185	-1.19381	-0.794162	-0.710256	2.34967
92.2	-5.02699	1.3245	-2.05534	-4.28723	-2.39528	-0.176955	0.502779	1.11376
92.3	2.93165	-1.11028	-0.843819	-2.44404	-1.15623	1.04743	1.71144	-0.120074
92.4	-0.712741	-0.492958	0.363773	-3.04435	2.51855	-2.00025	-1.35249	-1.35193
92.5	-0.693463	1.95089	-0.261924	3.06285	3.13652	-3.21408	-3.8025	0.46688
92.6	-1.89575	-0.4896	-1.49792	0.620566	1.92331	-0.768529	-0.152162	1.67173
92.7	-1.26848	-0.487727	-1.51389	-2.4276	-1.72714	-0.158638	-0.169642	2.26376
92.8	-1.25433	1.34198	-0.312353	-1.2025	1.94595	1.66794	4.07901	-2.63386
92.9	2.41611	-0.491874	-1.55434	0.628865	1.34288	-2.60813	-0.828987	2.23331
93	1.8089	3.16408	-0.357056	1.23599	1.95997	2.87859	-0.24141	2.82166
93.1	0.590989	-1.11546	2.05518	-3.64696	0.136383	-0.793469	-0.876307	-1.47016
93.2	1.81234	0.709386	-2.24666	0.0150054	1.3647	-0.191659	-0.902028	0.342901
93.3	-3.67797	-1.1295	-1.66401	1.22945	0.760878	2.84635	-3.97824	-1.5073
93.4	-3.67154	-1.13713	-1.69419	-3.04755	-1.6714	2.82806	-3.39157	-1.52589
93.5	-0.61813	-2.36586	-1.11641	0.609297	3.21777	-0.850194	1.46064	-3.98481
93.6	1.20802	-4.20352	0.677947	-1.83996	-0.439517	-0.86408	0.204397	-0.952561
93.7	-1.84907	0.668046	-2.41094	0.592231	-1.65091	-0.879376	-3.48953	-4.63491
93.8	2.41525	1.26015	4.26053	-0.0305446	0.18846	-0.896182	0.139851	1.44466
93.9	-3.08648	3.06905	-2.49722	3.00496	0.194584	2.74407	1.93193	0.193916
94	-0.042441	-0.00498495	-0.706576	1.7649	0.810076	0.278258	1.89047	0.163936
94.1	-0.0546903	-3.07417	-0.140322	2.35525	-2.23458	-4.01327	-1.20026	-1.69628
94.2	-1.89757	3.61747	1.03328	-0.715339	-0.395813	-2.20017	-1.84638	-0.50499
94.3	-1.29908	-3.7295	0.983949	1.09685	0.8289	-1.00169	2.38632	0.0733801
94.4	-0.0932222	1.74166	-2.72468	-0.754303	-1.60809	-2.85552	0.512828	-0.569578
94.5	2.93839	0.493725	2.10973	-1.38347	-2.21196	3.2199	-0.137676	0.00773386
94.6	-0.744144	1.07648	-2.2123	-1.40271	-4.03521	1.35547	-0.787053	1.19337
94.7	-1.98114	-0.172129	-5.30678	2.84529	-1.58789	0.10355	0.394001	1.15715
94.8	-1.99683	-3.85812	1.36045	-0.842769	2.07265	-2.3662	5.23115	-0.0982386
94.9	-0.183801	-0.220595	2.5265	-1.47574	0.236599	-2.39282	1.5223	-0.131168
95	0.4057	-1.46891	2.47067	3.3793	-2.81699	2.45789	-0.349824	0.446421
95.1	1.60347	-0.276332	2.41509	1.51661	-1.59804	-0.628315	4.48914	-0.805408
95.2	0.969425	0.30374	-0.688781	0.26652	-1.60274	-0.0504092	-1.65669	2.21466
95.3	6.43394	-1.55645	-3.78596	-4.03057	-1.60921	1.74549	-1.6925	-0.867289
95.4	0.30235	-2.19338	-0.169128	-1.61259	2.65079	-0.730584	-0.508268	2.76584
95.5	-0.329307	0.829636	3.44134	-0.419508	-1.63581	2.89566	-1.15508	-2.75237
95.6	-0.959584	-1.03096	0.338349	-1.05857	0.79164	-4.4607	-3.62926	-0.940401
95.7	-0.368991	3.81989	-0.92824	0.13244	0.77368	-3.26588	-3.65883	0.260683
95.8	3.87903	0.735076	2.07707	-3.55716	-3.514	0.975491	-0.638799	-0.367221
95.9	0.801805	0.705807	0.809507	1.90668	0.13206	2.15994	-0.672689	-0.381349
96	0.779612	-1.15187	2.59459	-0.566977	0.720755	3.34236	0.513753	1.43667
96.1	0.147966	0.0437575	-2.32965	-3.03559	1.30698	0.864344	2.30837	0.815056
96.2	-1.70167	1.84774	2.51331	-2.45043	-1.76756	-1.60831	-1.99723	0.197682
96.3	-1.71814	-1.83854	-0.57849	1.18246	-0.568705	-2.2464	-0.19609	-2.85443
96.4	-2.95385	0.580944	3.04467	1.75972	-1.81195	-0.443807	2.21193	0.809736
96.5	-3.5772	-0.66181	-3.70333	1.72657	0.605207	0.7459	0.347686	0.811184
96.6	-2.36994	-0.681565	0.539282	-3.1839	1.18804	1.93368	1.53665	1.42541
96.7	-1.77462	-0.0905565	-1.93194	0.452461	0.550152	-2.97796	-3.98313	-2.83652
96.8	-3.00948	-1.93877	-0.73803	-1.40537	-3.7448	-0.562503	0.874619	-3.42855
96.9	-0.583211	-4.39211	-1.98381	-0.819668	-0.713913	4.28758	1.45541	0.251751
97	1.22871	2.30654	-1.39637	-1.45371	-1.34688	-4.89561	-1.62245	-0.950316
97.1	0.598195	-0.763053	-0.198955	-0.256314	-0.75826	-0.645551	-0.424956	2.12109
97.2	3.01777	-0.167051	-2.66105	0.939765	3.48871	1.76748	0.161439	1.53079
97.3	-3.71364	-2.61994	-1.45849	1.52485	2.24072	-1.92103	0.74779	-0.275002
97.4	1.15347	2.24999	1.57213	0.280699	3.43546	-0.113741	-2.93395	-0.24521
97.5	2.35254	2.23327	0.329714	-0.959731	0.361004	-0.748179	4.36846	3.4457
97.6	-0.718806	-2.05067	0.310447	3.29138	2.17214	1.05854	0.0726429	-0.185042
97.7	-0.125329	-0.837436	0.902115	0.218644	0.932513	-2.62508	-1.77418	2.29141
97.8	-0.752311	4.03271	2.10345	0.202444	-1.52259	0.406818	-1.1768	0.497156
97.9	2.28063	0.357484	-2.79405	-0.421611	-2.14205	3.43385	-1.79837	-0.0717888
98	-0.179899	2.17788	0.24579	0.177064	1.50941	-4.5193	2.46111	-0.637552
98.1	-0.805979	2.7757	-4.0365	1.99622	-0.942429	-2.08962	0.616566	1.8484
98.2	-5.08893	-0.285717	-0.992473	3.20432	0.270427	-3.32176	-0.612712	0.672598
98.3	-0.216798	-1.5115	-0.392624	-3.51429	-1.56663	2.1573	-3.05715	-0.499462
98.4	-1.45147	-0.295636	1.4263	0.758393	0.259536	2.74919	-3.05584	1.9904
98.5	0.975023	0.308254	0.193625	0.75695	1.47326	-4.58499	0.605817	-3.45053
98.6	0.348163	-2.74741	3.84209	-0.461282	2.6853	8.21891	-1.83529	0.875714
98.7	2.16178	-0.919026	-0.442655	1.98421	-3.42152	-0.341844	-0.00124832	-3.95276
98.8	4.58183	0.905683	-0.449929	-2.27939	-4.63799	-0.957025	1.22151	1.59374
98.9	-0.929251	-2.76091	0.763092	-1.65343	-4.0228	2.08937	2.44395	-3.23709
99	0.278195	1.50663	1.36478	1.41352	3.9079	2.0829	1.83691	-2.57149
99.1	-2.1748	-0.331509	-0.472977	0.209514	-2.20168	1.46862	1.23332	-0.0790715
99.2	-2.18343	-0.336481	-1.69665	1.45031	-0.373042	-3.41073	1.85269	1.18758
99.3	0.857207	-0.341092	-0.478158	1.47253	6.32907	-0.351799	-0.575667	-2.42776
99.4	-0.375923	-0.345247	-0.480709	-4.5994	-1.61712	0.264029	0.661588	0.0597889
99.5	-0.996291	0.260886	2.56642	1.53889	2.64607	-0.338927	-1.75975	-0.508273
99.6	0.214552	-2.1823	0.730561	-2.69766	-1.63715	-2.15832	0.703973	-0.467498
99.7	-0.40544	-2.18091	-0.490815	-1.43527	0.793586	0.905712	0.11622	-1.64842
99.8	0.196078	1.47982	-1.09897	2.87601	-1.66043	0.307008	-2.29759	2.04881
99.9	0.797173	1.47573	-1.70479	-4.40393	0.156594	-1.50823	0.173312	0.248811
100	-1.65091	-0.96642	1.35031	2.35698	-3.51981	0.950047	-1.62705	-2.7693
100.1	0.784542	-5.84176	-1.08697	-2.4787	-0.483877	0.356341	0.846089	1.53323
100.2	0.167137	-2.17	-1.07889	1.23341	0.104801	-2.67364	1.48666	-3.93112
100.3	-0.448348	-1.55315	1.36978	-1.15781	-1.74892	-1.42798	-3.36033	-1.46032
100.4	-1.0619	2.11236	-3.50173	0.115347	-2.99141	1.03603	0.949667	-2.04549
100.5	2.59463	0.283996	0.784272	-2.88141	-0.575063	-1.99133	0.374045	2.24628
100.6	1.9762	-2.14937	-2.25341	0.225758	-2.43373	-3.18229	0.409945	1.03968
100.7	0.139903	0.301136	-1.01496	0.887933	-0.0223742	1.72756	1.0559	2.27229
100.8	-1.69243	3.3576	0.832688	-1.50004	-0.0564769	-0.688583	1.09095	2.28075
100.9	-0.472137	-2.73711	3.28842	0.994274	1.12745	2.38829	3.56477	-1.37143
101	-2.91258	-0.282234	2.08286	1.0439	-0.74103	-4.29652	-1.89339	-1.36001
101.1	-0.470275	-0.27023	0.272006	1.09242	-1.38733	3.05636	4.24392	1.69811
101.2	-0.472024	2.7914	-1.5332	1.74926	-0.813561	1.85831	-2.43625	1.69948
101.3	-1.08389	1.57955	-3.33278	-1.25532	-0.851105	1.88203	-3.61619	-3.179
101.4	1.35361	0.370777	-2.07802	1.84159	-0.888801	-0.533586	-1.1362	-0.12293
101.5	-1.70219	0.994186	1.00551	1.2717	-3.36543	0.713583	0.728125	0.486389
101.6	-3.53336	1.00702	2.86538	0.0908276	2.08974	1.95764	-4.1195	-0.736232
101.7	-0.484011	-1.41886	1.67468	0.738908	1.43704	-1.06974	0.797309	0.481247
101.8	0.728877	1.64801	-1.34116	2.60228	-1.04296	1.3958	-0.394377	2.30485
101.9	1.93815	1.05042	1.74811	2.62962	-1.68804	-4.07117	-5.24354	-1.36402
102	0.704814	-1.98506	-1.26466	-1.00478	1.93727	-0.382027	2.72025	-4.41681
102.1	-0.527266	0.472984	-1.83096	-2.19627	-2.97995	-0.359695	0.910914	-1.3668
102.2	1.90044	-0.12289	-0.565465	-0.949817	1.86981	0.271237	-4.55475	-0.152586
102.3	-1.16542	-0.718015	-0.52068	-3.36781	2.44328	0.290052	-2.69407	-2.59954
102.4	-5.44568	-0.093014	-3.52355	0.31291	-0.0312282	-2.74104	0.380901	-3.8222
102.5	-3.62093	-0.0795948	1.40733	-1.50495	2.98906	-2.10882	0.399428	-0.774048
102.6	1.85781	-0.0668323	-2.8167	-1.49355	1.12777	2.78915	1.63573	1.04887
102.7	3.05671	2.38414	2.72464	-5.75395	1.10198	-0.250484	-0.790573	-1.39963
102.8	-0.62539	3.00016	2.15844	0.356314	-0.140501	-3.28527	-0.774734	1.03522
102.9	-0.032519	-0.0443922	1.59421	-1.47572	2.28077	0.391981	-1.37032	1.02689
103	2.388	0.574645	-0.797422	-1.47828	-2.61689	-1.42689	4.13108	1.62902
103.1	-1.90377	-0.02802	-0.74476	-0.264634	-0.794805	1.02504	1.69326	-2.64727
103.2	2.34926	-1.84999	-0.691811	-0.276012	1.02649	-3.23613	-1.96069	2.23186
103.3	-0.113448	-2.44996	2.40995	1.53894	-3.25047	1.04665	1.09845	-0.214921
103.4	1.0872	-3.65971	-3.64065	-0.920745	1.62999	-2.60656	-1.94724	1.0023
103.5	-0.15341	-0.600173	3.12526	-3.37826	1.62548	-0.15571	-0.719913	5.87624
103.6	-3.22048	-0.596865	-1.70777	-0.955516	1.01388	2.28966	-3.15461	0.985177
103.7	-0.793177	0.0146458	0.175551	-4.02776	-1.42312	-0.758001	3.56075	2.20185
103.8	-0.808852	-6.08389	0.225292	-1.60848	-0.194349	-0.141404	-1.93294	1.58734
103.9	-0.82338	-1.80625	0.274093	0.803944	-1.40474	-0.135951	1.12007	-0.85481
104	-2.66573	-1.80694	5.19975	-1.66821	-2.00091	-0.130573	-1.93086	-2.68202
104.1	-1.45415	-1.19938	-0.251216	0.740959	-0.764695	-3.17389	1.73121	-0.846909
104.2	2.80541	-1.20421	-3.86344	1.92458	2.30013	-1.33311	-3.1506	-2.06402
104.3	0.351074	-2.42992	-3.81145	-1.16336	1.0923	-4.98361	-3.75454	4.03828
104.4	-5.75493	-1.21555	-1.32211	3.07108	-1.94079	6.6169	2.35	-3.89574
104.5	-2.09072	3.04389	-1.88814	4.85757	-0.0884259	1.12167	0.515879	-3.27769
104.6	2.17823	-4.90118	2.42311	-1.89635	2.37131	1.12531	4.1733	-0.222116
104.7	-0.266133	-1.24635	-0.592985	0.509104	-1.2702	-1.9195	-0.712689	-3.88025
104.8	0.955317	1.79049	-0.556273	-0.138969	0.584172	-0.689682	1.11869	-2.65374
104.9	2.17693	3.60091	-0.521635	1.04373	-1.83263	-1.29106	-0.711444	-0.820567
105	0.959781	0.528987	-1.09887	2.22459	-0.585649	1.7678	-0.70803	5.88616
105.1	0.967268	-0.708227	-1.06736	-0.864418	-1.1701	2.3823	-1.31361	0.993411
105.2	-0.851721	-1.33383	-1.03812	-0.897646	-1.14355	-0.0523471	-1.30741	-3.89078
105.3	1.60393	1.08994	0.81805	-0.319934	-1.72676	-2.48133	1.74838	-3.88859
105.4	2.22827	3.50834	-0.380485	-2.18099	0.130073	0.583022	0.530735	-3.27809
105.5	-2.02384	1.65333	-2.79842	2.67045	-0.45606	-0.626068	2.36504	1.59787
105.6	-0.167303	2.24076	1.4934	0.197092	-1.04147	1.21689	-4.33989	4.63324
105.7	-3.18967	0.997671	-2.15222	-4.09865	-2.23606	2.4473	1.77405	2.78289
105.8	-0.105855	-0.242878	-2.13434	3.20135	-0.380193	1.84691	1.7792	-0.285055
105.9	4.19398	0.348647	2.14959	-0.486526	-4.01632	0.0291632	1.78513	0.919499
106	2.39033	-2.71889	1.54505	-1.1163	-0.938664	-1.78398	-3.69588	-0.928916
106.1	-2.4561	0.927643	-1.49922	1.30601	-3.35552	1.89513	-1.84833	2.10246
106.2	0.0262345	2.73867	-0.88087	-0.542566	2.15838	-1.74912	-1.22328	2.07726
106.3	0.676437	-0.940383	0.344092	2.49271	2.17289	0.712185	-1.20863	-2.8277
106.4	-0.502054	0.877049	-1.48402	0.0364347	2.18665	-2.92803	0.0259357	-2.84681
106.5	-0.457065	-0.965962	0.348093	-1.19332	1.59	1.97611	-3.0099	-2.86776
106.6	1.41848	-3.41324	1.565	1.8497	1.60371	-3.49467	0.667585	0.158236
106.7	-2.80594	-1.58544	-1.49043	0.620514	2.83644	-4.07625	1.28888	0.737473
106.8	-1.5333	-0.368899	0.946388	-3.65294	2.23716	0.221473	-2.96942	0.704125
106.9	-0.262481	0.847456	-2.72057	-2.42819	-0.800078	-1.58676	-2.95158	-6.03787
107	1.0063	-0.375258	-1.50373	-3.64292	-0.172843	-0.952471	1.94348	-0.57298
107.1	-3.21493	-0.373678	0.928873	4.29275	-0.156487	-0.319655	0.120759	0.61142
107.2	2.32811	0.240007	2.13589	-0.590348	-5.0179	-0.298243	0.12996	-1.86632
107.3	-2.50585	-2.80364	-1.53864	-0.584276	-3.16212	0.332332	2.57705	-3.73052
107.4	1.20566	-1.57067	1.50029	1.25231	-0.699807	0.351258	4.40838	1.11529
107.5	-0.578772	0.271937	-6.44323	-1.7916	-1.29055	0.979051	1.96668	1.0728
107.6	-1.14135	0.893727	1.48149	-0.560288	-3.09894	-1.44413	-2.30056	2.85915
107.7	0.124994	-2.75169	1.46293	0.0596025	1.80426	1.62418	-1.07275	-0.845935
107.8	-0.442016	0.319517	-0.995418	0.678823	-1.83787	0.417084	-2.28744	-0.88504
107.9	-1.61939	0.338026	-0.400887	-2.36117	3.06454	-1.39856	2.59667	-0.313844
108	1.47188	-1.47079	1.41139	-1.12643	1.25084	-1.99238	-2.28587	0.257017
108.1	-0.932712	-0.225583	-1.65837	-1.72299	-0.558494	1.07213	-1.67198	2.65708
108.2	0.323843	2.23817	3.814	-0.488841	0.685184	-3.7975	-1.66997	0.175783
108.3	0.96592	-1.39908	0.738715	1.96254	0.707563	0.487262	-0.449362	0.749824
108.4	0.994639	0.459758	1.93751	0.750744	-1.70847	2.32301	0.158148	-2.94359
108.5	-3.85706	1.09645	-0.524787	2.59017	0.149091	2.32433	-2.89496	-1.1399
108.6	-1.99435	0.513314	-1.76293	1.98691	-0.435512	-1.94414	0.154484	-1.77652
108.7	-1.96707	-0.067808	2.48886	-2.88357	1.42044	-1.32776	0.148101	3.07824
108.8	-1.94241	-1.86648	0.024778	-2.86672	-2.21469	-0.104472	-0.469067	-4.87882
108.9	-2.53019	-3.66093	-2.4346	-2.24061	0.864824	-0.714475	-1.69572	1.81638
109	2.36824	-2.40255	0.598437	-1.6163	-0.939566	1.72383	4.39608	-2.47461
109.1	-0.062621	0.683047	-2.47215	0.835392	1.52795	2.93622	-0.500611	1.78186
109.2	0.557483	2.54343	-5.53673	-1.59643	-1.4971	-1.34303	1.31861	2.37382
109.3	-3.09428	-1.69698	1.16051	0.853838	0.971566	-2.56658	-4.18376	-3.1305
109.4	-0.643532	-0.440986	0.527146	5.12768	-3.2719	1.08866	3.73807	0.524583
109.5	0.580741	0.202914	-0.105387	0.245965	1.63913	-1.36241	-2.38116	2.34534
109.6	1.80055	0.235921	-4.39555	0.860787	-0.776752	-1.37111	-2.39189	4.77418
109.7	-1.86193	1.48843	1.68807	-1.57517	-1.96866	-1.99089	-4.84255	-3.77545
109.8	1.18827	2.73835	-2.60652	-2.17794	1.71936	-2.00109	-1.80146	-0.72137
109.9	-0.037439	-0.282706	-0.185949	-0.951282	0.521639	-2.01273	0.623021	2.93773
110	-1.87186	-0.85908	2.83895	0.88164	-0.674297	-3.2453	-0.616601	2.93228
110.1	-0.0453499	2.8336	-0.85001	-0.338926	-2.47833	-0.208635	0.584375	-0.730478
110.2	-0.0527084	4.68924	0.345618	-1.55829	-3.66987	2.82061	1.78212	-1.9459
110.3	0.548828	-1.3861	0.318579	-2.16686	3.67642	0.354791	2.97668	-0.109384
110.4	-0.0710135	0.476599	-2.75797	-2.16603	-1.1879	-2.71716	0.509656	-0.105248
110.5	-1.29984	0.505531	-1.56106	-0.947314	3.10239	0.923023	-4.39209	2.3381
110.6	-0.697326	-0.686067	1.46179	1.48686	0.675675	2.1159	2.30049	-0.711063
110.7	-4.97415	-5.53496	0.209468	3.91455	-4.79629	-2.79206	2.27203	-0.0957327
110.8	1.73284	-3.66839	-2.26082	5.11612	-2.33214	-0.984009	-2.02511	0.518274
110.9	-1.93918	-0.587603	1.37026	0.215977	4.39378	0.209821	-0.826488	-4.96669
111	1.71317	-3.61213	3.16386	0.201678	0.129223	0.790693	0.369272	-3.12431
111.1	-1.95835	0.684382	0.684614	-3.47293	-0.47025	1.97936	-1.4866	1.76246
111.2	2.91427	-4.78569	0.0384356	-0.434866	-2.28997	-0.493554	-2.11987	-0.0684761
111.3	-1.36848	1.94779	0.611923	-1.06309	0.16014	0.69622	-0.923239	0.542278
111.4	2.89425	-2.30993	-2.47535	0.747158	-2.88431	4.32194	3.31912	-0.678513
111.5	-0.777611	-0.464342	2.36902	-1.71611	-2.87594	-0.596688	2.67445	-1.28841
111.6	-4.44159	-1.6739	-2.5533	-1.73721	0.179135	1.20095	3.85958	1.15021
111.7	5.92649	-1.0547	-1.36941	-3.5892	0.177358	-0.0543738	1.99294	-3.12472
111.8	-1.40806	0.779718	2.85993	-1.78069	-3.48494	-4.35657	-3.52909	-1.29522
111.9	2.85765	-0.441415	-1.45639	0.0225784	-1.04456	-4.99229	0.71516	2.96813
112	-0.201514	0.775623	-2.71608	0.601099	-0.440394	1.68971	-1.75687	0.514276
112.1	1.01416	2.59676	-0.315371	-4.92067	1.3799	1.65088	0.653394	-2.546
112.2	-0.211077	-1.07663	-2.18806	1.76184	0.145649	-2.65637	-3.03904	-1.94315
112.3	-2.04316	0.741793	-1.00854	0.502904	0.740737	0.361692	-4.28556	-2.56232
112.4	-1.43228	-2.93429	0.16859	0.464525	1.33221	0.934677	-3.09097	-1.35237
112.5	0.39711	1.32045	1.34353	-0.184848	-1.73843	-3.37145	1.14971	-1.36553
112.6	2.22297	1.90519	0.68722	0.995082	-0.537148	-1.57146	-3.76433	-0.769956
112.7	-1.44253	-0.562952	4.30095	-1.4869	0.65935	-0.994327	-1.35173	-3.2251
112.8	-2.66195	0.629323	-3.06715	-6.40388	0.0218981	-1.0278	-2.60244	-0.798003
112.9	-0.220765	6.08455	-4.93199	-0.336461	4.87117	-0.451056	-0.192156	-0.815121
113	-4.49209	-0.668738	1.13467	0.840246	-1.87649	-2.31399	0.994036	1.60664
113.1	-0.219086	-1.3138	-3.17507	1.4043	0.533508	1.92469	-0.260788	-4.51263
113.2	0.386228	-1.96005	-0.157771	0.137558	-1.94105	1.88725	0.316498	0.356285
113.3	0.379723	-4.43646	-2.02273	-1.12694	-1.36365	-1.80803	1.50284	3.99699
113.4	-3.28622	-4.47099	3.43485	1.26952	-0.179156	-1.22722	0.248455	1.53424
113.5	-0.848458	-2.67807	-0.872316	1.83224	2.22104	1.79199	0.826504	1.51681
113.6	-1.46541	-1.50009	2.14813	1.17487	0.346851	2.36691	3.23341	1.50108
113.7	3.40523	-2.15503	-2.15213	-0.0901079	-1.52491	-1.32678	-0.461046	-0.342017
113.8	1.55754	0.238927	-2.17322	1.69721	-3.39412	0.475407	-5.3666	1.47914
113.9	-2.1173	-3.47028	2.07644	2.26271	-2.82165	-0.773794	3.76302	-1.57894
114	-0.908555	0.753758	-1.60655	-1.43967	-2.25115	-4.45853	0.681023	0.859266
114.1	-0.923472	-1.12871	-1.62123	-0.864746	-1.6825	-0.817996	3.70419	-1.5827
114.2	-3.98891	0.0408578	2.63483	0.930634	0.103918	1.59687	-2.42307	0.251172
114.3	-0.342896	2.42745	0.787382	1.50539	-0.552663	4.61772	4.26841	1.47456
114.4	-1.58396	1.15087	-2.2735	0.252423	-2.42773	1.53612	-1.24627	0.259522
114.5	2.05349	-1.95222	-2.27719	-2.8244	1.79829	-3.97724	-0.0405487	1.48887
114.6	4.46234	-0.170731	1.37995	-7.11144	1.74782	-0.332241	-8.59072	0.88958
114.7	1.98665	6.4858	3.81259	4.4668	-4.39974	3.91653	1.17097	0.904348
114.8	-2.31512	2.15451	1.36463	-2.26679	-0.169035	0.841262	-1.27911	-0.297288
114.9	-1.12236	-3.99641	-2.29578	0.162844	1.61476	-1.00696	2.98547	-2.71305
115	-1.76292	-0.987819	-0.459102	1.37192	-0.872583	1.41824	-1.29223	-2.68216
115.1	1.25453	2.01596	1.98568	0.14342	0.91392	-2.25722	-0.0710033	2.22945
115.2	-0.613706	-2.91165	1.37878	3.79916	-0.351092	-0.435909	-3.11755	2.25603
115.3	-2.47993	1.31816	-1.05436	0.134539	0.826183	-5.32353	-1.2771	-0.153961
115.4	-0.075865	0.66323	0.787198	-5.34816	0.172779	-1.66301	-0.0470487	-0.117886
115.5	-1.94628	2.45026	-1.6417	-1.66993	-2.91725	-2.27589	-0.0359171	1.13969
115.6	-1.37536	1.79645	1.42313	3.22431	-0.512258	2.6023	-2.46084	-4.31056
115.7	1.63215	-1.29326	-2.22429	0.795669	1.88925	0.15608	1.2194	0.61732
115.8	0.364249	-1.32635	0.843645	-1.01466	-1.20044	0.765674	3.67575	1.26852
115.9	-0.902265	-3.18692	3.90623	-0.988459	5.47323	-0.453019	0.642379	0.0901979
116	-2.16721	-0.773869	1.47562	-2.17818	-0.669569	-2.88657	0.666551	-2.30461
116.1	-0.991445	0.416658	-0.949614	-2.75237	-0.0914067	0.784441	-1.13588	-1.64565
116.2	-1.03807	-1.44206	-0.930557	1.55566	1.70669	-0.427522	2.55554	1.45094
116.3	1.35406	2.19251	3.96677	-2.0687	-3.81407	0.804155	-1.68467	-1.55636
116.4	-0.52688	0.334039	-1.51112	2.85315	1.0435	2.64533	4.45143	0.319717
116.5	-0.574724	-2.73829	-3.92937	-0.768926	2.23465	0.216827	-0.398025	-1.46719
116.6	-1.84164	-2.14407	-1.46498	1.71566	-1.45292	-2.81445	-1.57734	0.406846
116.7	2.99191	2.71918	-2.66425	0.538571	-1.47308	-1.56943	0.296386	-1.38265
116.8	-3.15878	0.25778	-1.4226	-0.0249795	-0.272114	-0.324992	0.33903	-0.731156
116.9	-1.97928	-0.977296	-3.84234	1.24295	-0.291438	-1.52031	-0.226498	-1.30227
117	1.02829	-4.64695	-0.160389	1.89946	-3.3579	0.336979	-2.61874	1.17449
117.1	-2.06618	0.22908	-0.144941	-1.10323	2.11967	0.362752	-0.736884	-3.06295
117.2	0.944535	-0.390324	-0.130401	2.60751	0.880641	0.389791	2.3616	3.07151
117.3	2.1218	-0.396831	-2.55585	0.213426	-1.57397	1.63745	0.576535	1.87455
117.4	2.07906	-0.401469	-1.31904	-0.34681	-0.363864	-0.165048	0.014786	-0.541905
117.5	-1.62016	-1.62385	-3.13444	-0.296476	-1.59384	-1.96298	-3.59455	0.0927546
117.6	2.61667	3.86508	-0.0692934	-2.07595	0.228607	1.12146	0.120047	-2.93471
117.7	-1.68927	0.808315	1.15952	0.415615	0.219391	-0.677524	-1.66083	2.57789
117.8	0.11297	0.807918	2.38498	1.07205	-0.398426	-0.643182	-3.43885	-5.3372
117.9	0.08458	0.199291	-1.27083	0.506478	-2.23353	1.8305	-1.55578	-1.65364
118	0.0584261	-1.62609	-2.48138	-0.66911	-1.62504	0.641124	-1.50676	-8.34514
118.1	-1.185	-1.00736	1.79724	1.81461	0.202613	-1.76516	2.80917	-1.00112
118.2	0.0151455	-4.65665	-0.0309587	-2.41542	-2.24081	1.93095	-2.031	-1.6002
118.3	-1.83369	4.50731	0.58269	-2.37055	0.199274	3.79056	-0.765572	2.67814
118.4	-4.28646	-0.979566	1.80423	-1.71786	3.24476	-1.06077	4.15427	-1.58995
118.5	1.19448	-2.79593	-0.63564	-1.06834	1.40666	-2.24423	-0.0834754	3.29536
118.6	-0.0405657	-2.16867	-5.51004	-4.69025	0.182248	-1.59648	-0.0462614	-0.366564
118.7	0.558165	1.50701	0.600406	2.05883	-1.03956	-3.99917	-3.05953	-0.363633
118.8	-1.28113	0.298318	1.8206	-4.01201	-2.86866	-0.90993	-3.62958	-1.58092
118.9	1.76339	1.53183	0.59926	-0.316676	-1.03576	2.1724	2.50679	3.30112
119	2.36498	-0.894818	-0.619646	-5.16684	0.7933	-0.240066	0.0924911	1.46585
119.1	-0.0813654	-0.876959	1.82252	-4.52135	2.00866	3.44857	0.11994	0.853401
119.2	-2.52097	-0.248664	0.601684	0.389409	-1.65677	0.421371	-2.2936	0.242033
119.3	-0.685802	4.0376	-1.22599	4.06926	-2.87636	-2.60124	-1.65551	0.241653
119.4	1.14727	-3.26901	2.43839	2.25244	-4.7036	-5.61928	-2.84984	0.851171
119.5	-4.94865	0.415121	-1.22057	-3.22084	0.179762	-0.0963327	-1.60472	0.240152
119.6	1.77341	-0.785275	1.22619	-0.148406	0.785075	-3.12236	2.68466	-2.80848
119.7	-0.662894	1.06619	-2.42825	-1.35196	3.21843	-1.26609	-0.963328	-0.363175
119.8	0.565164	0.475802	-2.4157	-0.725516	-0.450436	-3.07364	2.71067	2.07748
119.9	3.62087	2.32646	2.47615	2.3371	1.98556	1.2182	2.10697	-0.364459
120	0.573695	0.515741	1.26215	2.3434	0.758513	-3.64633	-2.15609	-1.58191
120.1	0.581751	-1.29075	-0.557888	1.73856	-1.0755	0.64325	-2.75425	-0.357927
120.2	2.41931	-3.70284	-0.543666	-1.91504	1.36277	1.87378	1.52476	-2.18511
120.3	-3.06355	-4.89014	1.91104	-1.904	-1.69101	-0.558416	2.74453	-0.959942
120.4	-3.65747	3.6813	0.704014	0.545076	-2.29918	-1.15837	-0.308365	0.262695
120.5	0.017977	-3.61725	0.720501	-0.670085	0.143223	2.50926	-0.918156	-0.346538
120.6	-1.192	-0.535249	-1.70039	1.77473	-0.467318	-1.75887	-0.918794	0.264601
120.7	3.08784	-1.11748	-1.67586	1.77486	0.753222	5.565	-0.921117	2.0935
120.8	-0.567857	1.96014	-1.64976	-0.664741	-3.51568	-1.76108	-3.36402	0.25957
120.9	-1.77768	-2.89498	-0.402672	-2.49046	-2.28765	-1.75701	0.293904	-0.961838
121	-0.546563	-1.64313	-5.86371	3.00375	1.37769	-1.75424	-0.32503	2.08637
121.1	-2.9768	-2.83303	0.272836	0.559756	-2.28042	2.51549	0.885241	-0.360396
121.2	-1.74419	3.29602	-0.308485	-1.87994	-2.27201	-1.15106	-1.56647	-0.364717
121.3	-1.12426	-1.56301	0.941982	2.39197	-0.433573	0.676433	3.30267	-1.59004
121.4	0.713514	2.73321	-2.07695	-0.661958	1.40198	-1.76874	-2.20438	-2.20484
121.5	-1.11125	-3.34542	2.83798	-0.661363	2.01511	0.0585068	-4.04279	3.27723
121.6	-2.93272	2.78223	-0.182547	-3.70962	-0.420947	0.662204	-2.82949	-2.83861
121.7	-3.53138	0.97023	-3.80597	0.565096	0.807054	0.0449011	-0.399742	-0.407742
121.8	3.79761	1.60002	-0.104557	0.563191	-2.23484	1.25779	-1.63386	2.01643
121.9	-1.08306	-1.43063	0.541328	-0.0483134	1.43729	-5.45861	3.23144	-2.27328
122	-1.07631	-0.18776	2.40582	1.17083	0.22499	0.642931	0.159957	-2.89784
122.1	-4.11851	0.442092	2.43758	-0.051129	0.23545	0.0252013	0.142854	-2.30343
122.2	2.60109	-0.149706	-1.7988	-2.4898	1.46628	-0.591147	2.5643	-2.32167
122.3	0.770783	0.478241	-1.14877	-3.09406	1.47611	-2.4255	-3.55591	0.0974814
122.4	-1.05592	0.494284	-0.500148	-3.08705	-2.17162	0.0123651	1.31112	-1.75783
122.5	1.99908	-2.53936	1.3664	2.40798	-0.933242	-2.43216	-2.36818	-1.78154
122.6	0.170278	0.529513	-1.6492	0.575314	-4.57439	3.05524	2.496	1.85203
122.7	-1.0448	-0.676748	-1.61073	1.79506	4.59723	-2.44328	4.30151	-2.44952
122.8	0.791782	-3.10079	0.865861	-2.47537	-0.27265	-1.83302	-3.65277	-1.86563
122.9	0.186381	-0.0329453	3.33665	-1.24973	-2.69301	0.605708	0.603433	-1.89357
123	0.192709	-3.06922	-5.17389	0.583008	1.59944	-2.44761	-0.026993	2.9557
123.1	1.41941	-3.05121	2.18471	1.19228	-5.09135	-0.616325	-0.0465693	0.477624
123.2	-0.404076	-0.594675	-4.49676	-0.639108	2.86558	3.0411	-1.89538	1.05252
123.3	-1.00335	-3.63115	1.02856	0.581252	-1.38775	-0.625182	-1.30156	-1.42288
123.4	-2.81974	1.26475	2.27323	-3.07959	-0.144503	3.64298	-0.0992061	0.374733
123.5	0.246683	1.27269	0.465122	0.582812	4.14546	-1.2431	-4.38694	-0.270124
123.6	-2.17935	1.28036	-1.34106	-4.29956	-0.718838	-1.8509	0.480077	-0.913378
123.7	-3.37965	0.0682422	2.34227	-0.636943	1.13412	2.42073	-0.759924	-0.945026
123.8	0.911571	2.51674	0.528598	-3.69002	-3.72344	3.02554	3.49036	-1.58559
123.9	2.14694	0.0822444	-1.28352	-0.0311251	-0.644429	-0.639064	-0.804137	1.43455
124	-2.10641	0.0914879	-3.70384	-1.25882	1.81882	-1.2477	-1.43149	-1.03787
124.1	3.40615	-2.33829	0.585731	0.563288	-0.600763	0.58378	-6.93539	-3.50402
124.2	-2.06617	-1.71451	-2.45234	2.38033	-1.79598	-0.027408	0.986249	-1.69553
124.3	5.27849	-0.482239	-3.04763	1.7533	-6.64722	-2.46667	-0.253806	3.76945
124.4	0.415074	1.96708	-1.20503	-0.703112	-1.73289	-1.85248	0.947833	3.73757
124.5	-0.778793	-1.07616	0.0218264	1.72206	-1.7064	0.589426	3.9766	3.70752
124.6	-0.749466	-2.28409	1.24385	-0.127006	-1.0704	-2.46159	0.292409	-1.80838
124.7	0.500596	-1.05061	1.85121	2.90444	1.3934	-0.628925	-0.945173	-2.43353
124.8	-0.0798016	-1.64877	1.84505	-0.778375	-2.24531	-3.67817	0.259068	0.60284
124.9	-0.657843	3.24194	3.66554	-0.186603	0.220498	1.20502	-1.58732	-0.023469
125	-1.84328	-0.413539	-2.44684	-2.03571	3.29102	2.41972	0.838756	0.5728
125.1	1.243	1.42587	-3.67161	-0.832933	-1.57137	-1.85603	-0.397785	-1.26932
125.2	-5.43172	-4.6652	-4.28666	-0.852425	2.11219	-1.85543	3.24672	1.16213
125.3	-1.72655	0.840781	-0.634657	-2.70134	0.300585	-1.24542	-0.43235	-0.67788
125.4	-0.466894	-0.981426	-1.26048	1.55083	0.931429	-0.0272101	-2.27422	0.535996
125.5	0.790923	-0.971092	-0.0580714	2.13623	0.341378	-2.47027	-2.28256	1.13917
125.6	0.217515	-0.351363	-1.29921	1.50134	2.19126	0.578848	-1.07082	0.523036
125.7	-2.18357	3.31547	-0.101025	0.258486	-2.06022	-1.25639	1.96822	1.73863
125.8	0.908193	0.267441	1.70239	-0.37144	1.6232	-1.86882	1.34315	0.514087
125.9	-1.49354	0.883617	-1.98754	-2.82853	2.25031	6.05608	0.109901	0.512677
126	-3.89028	-0.330959	-3.23309	0.817618	-0.782672	-1.88852	-4.16938	-1.31691
126.1	1.64459	-0.323946	0.399942	-4.07892	-1.37101	-3.72018	-2.34252	0.516492
126.2	-1.36799	0.902209	-0.244257	0.791282	-2.5683	1.15876	-1.73863	-2.53101
126.3	0.503183	0.296434	1.55015	0.77494	1.11432	0.540108	1.30313	2.9645
126.4	-0.0687127	-2.13757	-0.928663	-5.33763	-1.91805	-1.90672	1.29022	-3.13578
126.5	-2.46922	-3.95713	-0.964775	-0.461403	-0.0668717	-4.34885	-1.16155	-3.12646
126.6	1.23182	0.934026	-2.83106	-1.69107	-2.48797	2.35988	0.65977	-3.727
126.7	-0.563027	-3.94051	2.01274	-1.69763	-3.68516	2.34797	-3.01033	-2.49733
126.8	3.74214	-2.70788	-2.90969	0.735873	-0.612142	-1.93218	0.643673	-1.27047
126.9	1.33038	-0.86786	1.93308	-1.10256	-4.25281	0.503436	0.0220595	-1.26606
127	0.751379	3.40761	0.668477	-2.93624	-1.17943	-0.724223	2.45032	-1.87206
127.1	0.781921	1.57727	-1.81319	0.11268	-0.551529	1.70907	-0.00419902	-0.038694
127.2	0.201224	-0.859034	0.588243	3.15646	1.29414	-1.95978	-0.014876	-1.25865
127.3	-0.989591	-0.241632	-0.0634196	-2.34144	0.0868304	1.08611	-2.46458	-1.86746
127.4	-2.17963	2.20387	1.72578	1.31843	0.710474	1.6873	-2.47053	0.572644
127.5	-2.75917	-2.67237	1.68296	4.36179	-1.71665	1.67797	3.0111	1.78737
127.6	-1.50992	-3.88043	1.64118	-0.527151	0.738086	-1.37955	-0.66457	2.9986
127.7	-4.53295	-2.03732	-0.838403	0.0817518	0.138104	-0.162154	-0.0649645	-3.72029
127.8	-1.45411	1.6314	0.956375	0.689809	-0.461926	-2.6049	-3.12524	-1.89033
127.9	-0.821945	-3.85327	-2.12904	0.0773821	0.767166	-3.21278	0.527511	1.76436
128	1.02688	-2.00998	0.280846	1.29542	4.43133	-0.160155	-2.53455	1.75248
128.1	-2.00754	-0.170255	-0.361218	0.681639	2.59891	-0.161468	1.11621	1.13014
128.2	-0.769316	0.446359	-2.21993	1.28828	-1.67056	2.27707	3.53962	-4.36952
128.3	1.07458	1.06176	-1.63439	1.28352	-2.88464	0.443446	-1.35948	0.50689
128.4	-3.18429	0.456457	2.00028	-1.77057	-1.04944	-0.775824	4.11599	3.54396
128.5	0.490289	-0.757301	-4.12652	-2.38031	0.78021	-2.60142	-3.22498	-3.18122
128.6	3.54605	4.73872	0.126296	0.0590979	-2.88337	-1.3737	-2.62566	1.69195
128.7	3.54521	-1.97091	3.76267	-1.16579	-0.444075	2.29146	-0.199383	-1.3713
128.8	-0.116009	-0.740326	-2.9721	1.26905	0.769043	-0.147301	-2.65698	-0.160169
128.9	-1.94272	-1.95097	-1.1553	-0.570555	1.97789	0.468332	2.20619	-0.170792
129	-0.109304	1.10914	-0.5599	-4.23732	-2.30527	-3.18475	-0.258282	0.428577
129.1	1.71852	-1.32446	1.2554	4.90616	-4.75253	-0.732496	-0.889674	-0.192413
129.2	-2.55663	2.95399	-1.19959	0.00556686	-0.489491	-3.16251	-1.52101	0.407779
129.3	-2.55699	1.1264	0.620022	-0.00914247	-1.72439	2.94931	-2.76212	-0.821885
129.4	0.489486	-3.74644	-1.22105	-1.24516	2.52901	-1.92598	0.266205	1.61006
129.5	-1.34993	0.536385	3.04028	-2.48062	-1.76439	-0.693864	0.848301	-1.44964
129.6	-2.57778	-2.50652	1.1969	-1.27659	0.656028	-4.95174	1.42811	-1.4534
129.7	2.29246	2.99262	-1.86112	-0.0768911	0.630835	-1.27442	-4.09169	1.59286
129.8	-2.60465	-0.0561183	-2.47296	-2.53992	-1.83501	1.78572	0.15452	-2.68255
129.9	-0.786507	1.77856	-0.033777	-5.60957	-2.4683	0.571295	-3.5351	0.368798
130	0.416601	-1.26906	-0.647081	2.91034	-0.0530319	1.79788	-1.73022	-0.243009
130.1	-1.43305	-1.26267	-2.4776	-0.783264	-1.91197	2.41182	3.11943	0.367306
130.2	0.987602	-1.25708	1.18413	-4.47114	-0.719481	0.58492	-0.577214	-0.241634
130.3	-3.9151	-2.47181	-1.25813	-3.88499	-3.79831	1.19981	1.22118	-1.45764
130.4	-0.273248	1.19301	0.573355	-2.6917	1.05514	3.03201	0.577193	-2.66977
130.5	-0.298662	-1.24777	-1.86637	0.936917	1.63032	-3.67693	1.76401	2.21936
130.6	-2.15479	0.583607	3.01636	-0.930453	-0.844654	1.21147	1.11966	-2.04603
130.7	-3.39895	-2.46759	1.18281	1.47324	-1.48567	0.601271	-2.57153	-5.08203
130.8	-0.983592	-3.07471	-3.08547	1.43255	1.53294	-0.00895783	1.06239	2.25513
130.9	-1.62311	0.58659	-0.637477	-1.04738	0.277323	-3.05823	-0.187901	0.432983
131	-0.433345	-0.0286237	0.586676	1.96525	-1.58544	-5.49296	1.00444	2.88407
131.1	1.97237	-1.25343	3.02835	2.53314	0.823935	1.22209	-1.46276	1.06334
131.2	2.543	-0.647663	-1.24162	-2.38732	0.180069	-1.22368	-0.874981	-1.9721
131.3	1.28231	-0.653951	-3.67348	-0.590084	-0.462198	0.602298	-3.9454	5.36529
131.4	1.85247	-0.661324	-1.22218	0.594869	-1.71253	0.594152	0.308845	-1.94471
131.5	1.20116	-1.27955	1.83435	-1.26998	-1.13064	-0.634621	-0.931249	-1.31253
131.6	-2.4984	-0.0685469	0.616881	4.79711	1.27988	-1.25233	-0.947427	-3.72946
131.7	3.5646	-1.90991	-1.81743	-1.34089	-3.021	-2.47964	0.258064	1.17612
131.8	1.68822	0.519372	-0.588206	-2.58654	-2.43478	-1.26639	-2.19499	2.41412
131.9	-1.40444	-2.54509	0.638804	0.440967	-0.629597	2.38273	-1.59193	-3.6668
132	-4.49131	1.1026	-0.575378	4.68472	1.17269	-3.12222	-3.42632	1.24017
132.1	-1.47492	-0.745662	-4.22588	-3.27185	3.58185	-0.690071	4.50175	-1.17924
132.2	2.75471	2.2869	0.66754	0.375778	1.71872	-2.53138	1.44168	-3.59359
132.3	-1.56073	1.65427	-3.59475	-0.858308	0.469825	-2.54017	-3.4384	-0.515188
132.4	-3.42885	-0.807	0.0783697	-0.257039	-0.166	1.1092	2.06005	0.728056
132.5	-3.46432	-1.43474	1.30549	-0.87269	-1.40937	-2.56592	0.843533	-0.470026
132.6	-0.451342	-0.232539	-0.518299	-4.53195	4.05789	-0.136486	-0.977123	-0.446178
132.7	-2.32268	-5.13071	-1.11868	2.79545	-1.46016	-0.760779	-0.351944	-4.69056
132.8	-1.75164	-1.48326	3.7702	0.35626	-0.259075	1.66474	-0.94425	2.65862
132.9	0.0375176	-0.89229	-2.93537	2.19399	1.55038	0.426859	2.12626	-0.372612
133	1.21323	0.306776	1.95797	0.373388	-2.74015	-0.198931	2.14506	0.870202
133.1	-1.27189	2.72248	1.35431	-0.220354	0.295922	1.61545	3.38638	0.890809
133.2	-0.0935623	-0.964514	1.97173	1.62969	0.278435	0.987371	-0.859515	1.52082
133.3	0.472764	-0.376316	-1.67994	-2.61796	-4.00602	-2.68792	-0.216069	-2.72878
133.4	0.428344	-4.66749	-1.66559	-5.02465	0.25563	2.18098	-2.01	-0.263146
133.5	0.993917	3.85441	-2.26064	0.503174	-2.807	0.333581	1.08038	-0.241751
133.6	-0.88038	0.164433	2.63352	2.36433	-3.42345	0.319726	0.508755	-1.4403
133.7	5.78579	-0.46944	-1.62792	3.0048	-0.379114	-0.912881	-2.49836	1.02154
133.8	-0.365545	1.94678	-0.392763	2.42674	-2.82746	0.296834	0.600061	1.03902
133.9	-0.406761	1.9193	0.84035	1.8518	2.0471	0.285719	-1.79355	2.88514
134	-4.10588	-2.37632	-0.977436	-0.549507	-2.84282	-1.55342	0.697156	-1.98023
134.1	1.34912	-0.565911	-2.18172	-0.505592	-2.23418	-5.8266	5.01351	-4.39752
134.2	-0.523026	0.0214915	-1.55424	0.149252	3.86201	-2.77301	-1.04332	1.72595
134.3	2.48711	-0.611676	2.1209	0.803882	2.63018	3.32466	1.44911	1.12958
134.4	-3.65436	-0.0240344	0.910882	-0.98096	0.792088	0.875292	0.27856	-3.1246
134.5	-3.68558	1.78192	-1.51617	-0.322788	0.788025	-1.56762	-2.10899	-2.49289
134.6	-1.27719	-0.074275	0.9396	-2.10473	-1.04411	1.48371	-2.05293	-4.30192
134.7	-3.75099	-3.14639	0.95159	-3.27352	0.787003	0.872205	-5.65577	5.4772
134.8	1.09771	1.71422	-2.0851	-4.44039	-2.8721	-0.346169	-3.15462	-1.22678
134.9	-0.769712	1.68722	-2.67674	1.10159	-2.86435	-0.340834	-2.48865	0.618423
135	-1.41317	-1.99816	-3.26721	-0.685353	-1.02636	1.49561	-0.605773	-0.589335
135.1	-0.225244	-3.23721	3.46039	-0.0309486	-3.45929	4.54979	0.662035	-0.575777
135.2	2.18071	-5.69333	-3.84957	0.620847	-3.44747	-2.15612	-1.73296	-0.562763
135.3	-0.904836	-0.217928	-0.169638	0.0503856	1.4431	-0.310348	0.752813	1.88875
135.4	-0.324724	-0.241189	-1.98479	-0.520595	2.66612	-0.295595	0.792587	1.89593
135.5	3.91384	-0.264507	-1.96715	-1.70191	1.44831	-3.32776	-1.60891	-3.58509
135.6	-1.001	2.15109	1.09911	1.9953	2.67249	-0.254746	-2.78849	-2.95813
135.7	-1.02687	-0.925965	-0.10898	-5.29209	-1.59286	-2.06425	3.95852	-2.33263
135.8	-1.05141	0.880922	2.34382	-2.81093	1.46785	-0.210253	1.5433	-1.09887
135.9	-2.90378	-0.974439	-0.086215	-3.38521	-2.79381	0.421859	-2.69914	1.35172
136	-0.48281	-0.387324	-0.682232	-1.52115	0.880432	-1.9949	2.21019	1.96803
136.1	-1.11376	-1.02102	0.552142	1.55691	-2.15907	-0.137795	1.61918	-2.90469
136.2	0.0876649	-1.65356	1.78407	0.358906	0.905666	0.496813	1.63614	-3.49946
136.3	3.11805	-1.0654	-0.644937	0.381068	-2.7421	-4.35701	-3.22785	2.61421
136.4	0.656981	0.741132	-0.0204779	-0.818002	-0.284366	-3.71311	1.06102	-2.8693
136.5	0.0324489	0.714957	0.602618	-2.01632	1.55958	1.80771	-1.36884	-0.415107
136.6	-1.8078	-1.75	0.00483173	-1.38459	-0.257713	-0.609077	-3.79685	-2.23397
136.7	0.626442	0.058342	-1.81143	0.463899	-0.851005	-4.85044	-1.95474	3.87742
136.8	-3.0389	-4.23412	-0.575491	-0.131678	0.387012	0.672278	-4.38735	2.65966
136.9	0.0130415	0.0187038	-0.561652	-0.727495	-2.03503	1.9153	-0.720383	-1.60446
137	0.62275	-0.614429	0.0618082	0.505632	4.08509	-1.11302	1.1075	1.45683
137.1	-1.20498	-4.90418	0.683991	0.515384	-0.781435	1.96139	-2.55836	-2.80493
137.2	-0.587407	1.79076	-1.13411	0.523711	2.28937	3.80931	0.488159	-0.350992
137.3	3.08046	3.59528	-3.55837	1.75013	-2.57161	1.38434	2.30738	-0.950619
137.4	-0.573085	-1.31004	2.55867	2.36302	-1.32454	2.0118	-1.36622	3.32897
137.5	0.661361	0.502627	0.127218	-0.0753322	0.530707	0.197834	1.06371	0.283175
137.6	-1.15265	-0.735935	-2.90898	2.36789	-0.0558995	0.215412	-1.99973	1.5117
137.7	-6.00904	4.12662	-4.71939	1.7563	0.578929	0.231586	-0.789417	-3.35966
137.8	-1.09711	-0.775108	-1.03819	-0.684537	-3.05494	-2.19265	1.6377	-0.294714
137.9	-1.07021	-0.177981	-2.24185	-1.90218	-2.41262	1.48402	-3.86671	2.1543
138	0.178691	1.63902	3.26453	-1.89899	0.668083	-3.99412	1.61552	-0.889383
138.1	-0.401635	-1.42381	-1.60528	2.37139	-2.35422	-2.75552	-0.839278	0.95072
138.2	3.89958	1.00907	4.5104	-1.2944	-2.3213	-0.910984	-1.45924	-3.31064
138.3	-0.341824	-4.48745	-4.62933	-0.075891	-0.458861	-2.72995	-2.68683	-3.90559
138.4	0.305459	-1.43428	0.273495	-1.90941	-1.64865	-0.888218	1.57677	-0.231814
138.5	-2.09505	0.395765	1.50823	-1.91094	0.822459	0.948455	-0.8741	0.994808
138.6	4.65754	-0.214319	-2.13749	0.525603	-2.19907	-2.09783	0.339728	-1.44051
138.7	-1.40587	-0.210773	-2.72738	-0.0923094	-0.336812	-2.09068	2.16238	1.00576
138.8	-0.138286	1.01505	4.00064	-3.14876	-0.307766	-2.08488	0.934307	1.00683
138.9	-4.35898	1.63158	4.61753	-0.712103	-2.10837	-0.25121	-2.11892	-0.822794
139	-3.08178	-3.23782	2.79383	-4.98811	0.362466	-0.251793	3.98176	-5.69904
139.1	3.07247	-0.777533	-4.51441	-0.719808	-0.220721	0.355963	-3.34237	-1.42109
139.2	1.89901	1.68092	-2.66249	-2.55814	-0.193498	-2.08771	2.15447	0.407474
139.3	-1.10001	1.08883	4.67283	2.92334	-2.60587	1.56936	-0.284531	3.44985
139.4	0.176383	-0.108804	-2.64098	-0.143352	-1.35549	-0.270088	0.331803	-2.05242
139.5	3.89027	-1.30102	0.424703	-0.156138	2.94058	-4.54635	-0.880559	1.60013
139.6	-5.20707	-0.0488571	-4.44318	1.04965	1.12998	4.59883	-2.08885	-0.244804
139.7	1.56765	-6.72288	-0.156063	-0.796602	-0.677885	-1.51923	3.41393	-0.869313
139.8	-3.25582	0.0336284	-3.1953	0.408622	1.78509	-3.96808	-0.23917	-0.88564
139.9	-1.36224	-1.14722	2.9167	-0.828469	1.80307	2.73268	-0.225515	1.53421
140	0.527672	0.725711	-1.95994	0.374973	-0.00952912	0.272565	1.61822	-0.931649
140.1	-0.0252361	0.768265	-2.55987	-2.69302	0.0092672	0.864772	-0.199394	-2.78586
140.2	-0.577259	-2.23563	2.32786	-0.877699	4.90444	-1.59411	-4.45172	-0.371115
140.3	-1.73825	0.256241	-1.94159	-1.50558	3.08108	-1.00054	-2.59765	2.64565
140.4	-0.458392	1.52552	0.503354	-2.7424	-4.22806	1.41998	0.472631	-4.10238
140.5	2.03783	0.354962	-0.716289	2.73013	0.670575	-0.433555	-0.731102	-4.13255
140.6	1.47966	1.01743	-0.105549	0.874683	-4.80779	0.154595	-0.103036	-1.11663
140.7	-2.12697	-1.36889	-2.54608	-1.58684	-2.95985	-0.478797	1.7433	1.28092
140.8	0.369947	1.12855	1.11434	-0.994659	-1.11714	-1.11168	-0.682351	1.84189
140.9	-0.79785	0.573169	-0.111841	1.42569	-4.76741	-0.524432	-2.49361	2.3993
141	-5.62329	-0.59021	-1.33696	-0.426834	1.95357	0.670917	0.576398	-3.75381
141.1	-3.73363	-1.75086	1.09739	-0.44617	-2.31594	-1.79496	-1.23812	-0.750522
141.2	-0.630058	0.139685	1.08643	-0.465017	0.128471	0.621774	-0.61063	-0.803775
141.3	1.24588	-4.07107	-1.97475	-1.09292	-2.92137	-0.0150842	-0.594852	-0.248964
141.4	-1.15217	3.31139	0.456347	-1.10898	-2.91809	-1.26039	3.07842	3.35188
141.5	1.33036	0.312989	2.88102	-1.12401	-1.08726	2.37487	-0.573732	-0.372704
141.6	-3.51123	1.58809	-2.01768	1.91087	1.34804	-3.75271	0.657898	-1.04234
141.7	1.41041	-0.188878	-2.64004	-1.15646	-0.491331	-0.721394	0.665936	-1.10196
141.8	1.44195	-1.96333	-0.214052	2.49091	-1.10916	3.52408	-3.59609	-0.552532
141.9	-2.18741	-1.90629	-4.50169	3.69356	-1.72727	-2.60377	-0.534676	-6.10211
142	3.33412	-2.46058	0.363794	0.0174785	1.31287	-3.84054	-1.7496	1.16378
142.1	-3.3528	1.25276	-0.879308	-1.82029	1.29687	1.63344	-4.18363	-4.99911
142.2	-2.10232	1.90812	-3.34078	-1.2135	0.669936	-3.87764	-1.73693	-2.0033
142.3	0.972314	0.12116	-1.53042	-0.605927	0.0431211	0.379564	0.0931025	-1.4519
142.4	-0.83977	0.774633	0.884921	-2.43656	-0.583475	0.97142	-4.78971	1.53818
142.5	-2.65093	-1.01437	-2.19328	-0.603119	0.009742	-0.265463	0.0911508	0.255145
142.6	-0.192955	-2.80214	0.831244	0.618849	-1.22825	-0.278725	-1.13704	1.41492
142.7	-1.40111	-2.75955	-1.63872	0.620697	-4.9034	-2.72929	0.684049	-1.0846
142.8	3.4877	-0.890356	-1.6655	1.23397	-0.645074	-2.12458	-1.15885	-1.13853
142.9	3.48589	-2.68602	1.96568	-2.4206	1.16541	0.309766	0.0488316	3.07762
143	1.04214	-0.212781	2.54046	1.25047	-1.90595	-1.52737	4.30119	1.7996
143.1	-2.61917	-0.18649	0.674861	-1.18205	1.12613	3.34784	3.05584	2.96514
143.2	-0.788396	-4.43171	2.47137	-2.99902	1.71322	-2.15092	-0.627449	2.30136
143.3	-1.40301	-3.79392	1.82545	-1.15309	-0.749387	0.898987	-1.256	-0.797711
143.4	0.419915	4.15599	-0.0383399	-1.13941	-0.767734	-1.54366	-4.32347	-0.229675
143.5	-4.47052	0.501257	2.98002	3.1429	-1.39518	-1.54139	1.76029	0.339873
143.6	0.402248	-3.15002	-3.1532	0.709727	1.63797	0.900863	-1.92482	-0.918114
143.7	-2.0539	-0.0908005	-0.127328	-2.93806	-2.65074	-0.92903	-2.55455	-0.951126
143.8	-1.45862	-0.0904095	-1.98464	-1.09105	-0.222396	1.51372	5.96268	-1.59063
143.9	-2.69586	-1.31357	-0.788666	1.36163	-3.28503	1.51326	-3.82963	-3.44501
144	-0.274149	-1.92857	-2.64275	-1.6789	-0.852199	0.29386	1.64105	3.24419
144.1	-2.73718	1.7219	-0.833506	5.0417	3.40684	-0.312902	-0.215964	-2.27131
144.2	-0.319224	-1.34604	-1.46562	0.772524	-0.877034	2.74038	-0.239742	-0.455407
144.3	-0.956453	1.68573	-2.09529	0.169088	-1.49173	-0.30963	-3.92146	1.36046
144.4	-0.374429	-5.04813	1.54574	0.785019	0.336073	0.305098	-0.888034	-1.70157
144.5	0.814814	2.25202	-1.52645	-3.47963	3.99182	-0.910454	0.310853	5.0021
144.6	-1.0482	-1.44111	-0.932874	-2.85932	1.54535	0.925172	3.33741	-0.498819
144.7	-1.07929	0.35761	-0.339348	-2.2418	-2.7229	2.14737	-0.348397	0.112262
144.8	1.32779	-0.289243	-0.355665	0.202066	2.16615	-0.29141	1.46178	-0.493838
144.9	1.90014	-2.76688	-0.370912	-0.409364	-0.878634	-3.3353	-4.04753	1.34359
145	-1.79742	0.245514	-0.385148	-0.411599	0.96312	-2.71497	-1.61806	-2.91693
145.1	-2.43929	1.42031	0.821028	-0.41564	-4.51327	2.17198	5.07597	-4.11727
145.2	1.7979	0.761475	0.196331	-3.47024	-0.830292	-2.09743	-4.09551	-1.04419
145.3	-3.11949	0.711965	-5.91411	-2.25241	2.23783	-2.09073	-0.442937	-1.02329
145.4	1.11919	-0.558328	-1.03633	-1.03881	-2.62475	-2.08476	-2.28416	-0.999952
145.5	-0.747826	2.44105	2.61287	-1.65861	-3.81732	-1.46985	-0.462047	-2.80365
145.6	1.04757	-1.27349	2.59682	0.160178	-0.127989	-2.68627	-1.691	0.885897
145.7	1.62021	-1.32267	1.36171	0.754367	1.11631	-2.07195	0.74226	0.301573
145.8	-0.246936	-1.98167	1.34887	2.56552	1.13956	-1.45985	-1.70593	-2.71909
145.9	0.328996	-1.41976	0.11682	0.713403	-0.0560994	2.19867	-1.09919	-0.244684
146	-0.315185	-0.858513	1.32641	-1.13606	1.18988	-0.85846	1.33685	1.00655
146.1	-1.56732	0.312056	1.92402	0.0660191	-3.05438	-2.08152	-1.1087	2.86602
146.2	0.23228	-1.56753	-2.3574	-3.61291	-1.19306	0.355058	1.93948	3.50304
146.3	-1.0198	-2.83252	1.29648	1.25145	-1.775	-0.873004	1.32421	-4.39713
146.4	-1.0491	0.174569	1.28467	-3.65002	3.13106	-0.880518	2.54039	1.13321
146.5	-1.07742	-4.74941	-2.3856	0.604406	0.0995244	-0.889471	3.14539	3.6042
146.6	-4.15345	-2.95458	-0.560854	-1.24685	1.9505	-3.94857	-3.56681	3.63158
146.7	-2.95416	2.49721	-1.78849	-0.654978	-1.69159	2.75284	0.100864	-3.65797
146.8	-1.75624	0.0136704	-0.57484	1.7656	-2.27959	0.293201	-2.3354	-3.00645
146.9	4.92809	-0.0236485	-2.41248	-1.91522	1.39972	2.10516	-2.93692	-0.527277
147	-0.594635	0.551246	-4.24664	-4.97787	-1.02794	-0.965967	-1.09779	-0.492527
147.1	-4.27599	-1.31151	0.629928	0.503316	-1.62391	0.235625	1.34777	-2.28777
147.2	3.63635	-0.729039	-3.0397	1.09705	0.217818	-2.83497	-2.91863	-1.64127
147.3	1.77819	-0.145074	-1.21442	4.7398	-2.21489	-1.63275	1.35979	-0.996953
147.4	-1.90439	-1.3888	-1.83177	-1.37903	-0.986935	2.00462	-2.90685	1.47435
147.5	1.73833	-0.188359	-0.00887267	2.88168	-2.20312	1.3652	1.3712	0.890995
147.6	2.9358	-0.207099	1.20077	1.64804	0.848515	-0.493676	1.98198	-0.301956
147.7	-1.96563	2.21583	-1.85998	0.418699	0.842483	-1.74023	0.761941	0.335669
147.8	-0.149198	2.19754	-0.0363622	-6.29401	-2.82498	0.0633715	-2.89511	2.19044
147.9	1.66454	0.962265	1.784	4.08142	-1.00043	-0.576545	-3.49667	-0.227772
148	-1.40238	3.99996	-1.88655	1.63349	1.4274	-0.606259	1.3902	-0.812952
148.1	0.415574	-0.892922	1.76765	-1.4175	-2.2497	-0.636573	0.779239	-3.22711
148.2	-2.03767	1.54286	-3.12126	-2.63136	-2.26346	-2.49651	-2.26986	-1.97885
148.3	-2.65637	-2.7316	-3.12186	-2.01173	-0.450163	4.18339	2.00368	-1.95337
148.4	-2.05403	-0.288789	2.36593	1.04748	-3.52046	-0.735295	-1.65839	-3.75803
148.5	-1.45264	4.58961	1.13627	-2.60479	-2.92805	-0.76628	-0.435641	0.5375
148.6	-1.4621	1.53299	-0.0901645	1.06902	-0.509209	-0.797104	-0.435183	-3.10309
148.7	1.57711	-1.51638	1.12568	1.6887	-2.36474	1.6114	-1.65458	-2.46917
148.8	-2.0971	0.319308	1.12045	-0.130008	1.27004	-0.862448	0.176801	-0.617947
148.9	-1.49606	-5.1647	0.506311	-0.723863	1.84802	-2.11136	-1.65424	-0.600549
149	3.37168	-0.881123	-3.15445	-1.92455	1.20484	-0.308382	-1.65264	0.0256465
149.1	-0.916769	-1.48346	-0.709544	1.75675	-4.92498	1.49191	-1.65117	0.649741
149.2	-0.928847	-2.08421	-0.707464	1.16411	-1.89627	-2.198	-1.03999	-1.77692
149.3	-1.55106	-2.68349	1.73461	-0.645243	2.34637	-4.65981	3.83826	1.28818
149.4	-0.343255	-1.45215	-0.0952521	-0.620307	-0.735628	-0.408066	-2.26847	0.688106
149.5	-2.18697	-0.833008	-0.700698	-1.81364	-3.20081	-0.431457	3.83202	1.30815
149.6	-0.978629	-1.43476	-0.0840872	2.48414	1.65704	0.156531	-2.27421	-1.12229
149.7	-3.43145	-3.25516	-1.90631	-1.15255	0.409202	-2.30373	1.99782	1.93936
149.8	0.827513	1.63471	0.544788	-1.73281	3.43358	0.120598	-2.88419	4.38475
149.9	-2.23921	1.02648	2.99253	1.34678	-1.4731	0.102912	-1.04855	1.3371
150	0.187644	1.02838	1.16872	-1.06744	0.948672	1.30649	3.22327	-1.70497
150.1	-2.87822	-3.84861	-0.649912	-1.64778	-0.291007	0.0704428	-1.65866	-1.69277
150.2	1.37881	-2.00968	-1.24383	1.43119	0.302832	-0.551547	-2.87129	-2.29097
150.3	0.749373	-2.00467	-0.61541	-4.03289	-1.54168	0.0491395	-1.64125	1.98931
150.4	6.21863	2.26742	-0.596321	-1.56008	-0.941625	0.0408489	-1.63181	0.162973
150.5	0.701639	0.432341	1.86334	0.907035	0.268929	-2.40443	-2.2308	-0.440852
150.6	2.51264	0.428865	-2.38737	-0.899901	0.869218	-1.18436	1.44096	2.00469
150.7	0.0519397	-1.40512	-1.7499	-2.70427	0.250679	0.645094	-3.42966	-2.8721
150.8	-4.2329	-2.62703	0.107578	-0.847711	-1.5843	0.643723	3.90572	-2.25196
150.9	-3.02133	0.420342	-2.30504	1.00393	4.51287	-1.1848	-0.966925	-1.0237
151	1.84648	0.411502	-0.442889	-0.807883	-0.375674	0.650875	0.26903	0.81153
151.1	-3.66092	1.01102	-0.411981	-2.00774	-0.984473	-2.39294	0.284527	-0.405882
151.2	-3.05984	-1.44067	-1.59897	-0.15798	-0.370844	1.88838	0.911198	-1.6211
151.3	-3.6794	-2.66926	0.876366	-1.97199	-1.5861	1.28539	-0.900964	-6.49251
151.4	3.01922	0.371621	-1.52985	-1.95485	2.08047	0.076011	-1.48872	-2.2082
151.5	0.558339	-0.25309	-1.49111	-0.720009	0.863115	-2.34833	-0.244859	0.238095
151.6	-0.678231	-0.877515	2.20698	1.12035	-2.17981	3.16086	-1.44135	2.06948
151.7	1.13624	0.327672	-1.41849	1.73582	1.49164	-1.7047	0.414222	-0.371322
151.8	-1.93107	-0.299395	-0.158329	-0.0906264	-4.59915	-1.07111	1.65712	1.4605
151.9	-1.94377	-2.14504	-4.3881	-1.30524	0.298325	3.83114	0.459148	0.849051
152	-0.127311	0.281082	-0.0728862	1.74936	-0.910861	-1.64041	1.09317	0.238047
152.1	-1.97299	0.263472	-0.0345561	0.528324	-0.897842	-0.392468	4.77482	-2.20176
152.2	-0.15666	-1.58308	1.83265	0.527892	0.944489	-3.41398	-3.74577	-1.5888
152.3	2.87544	0.232941	-3.62117	-1.91268	-2.09491	0.888498	-1.27423	1.46101
152.4	1.02347	0.216732	3.13017	-3.12983	-0.250575	-0.914234	-1.24697	0.845328
152.5	-2.04437	-1.62788	-1.71784	1.75216	0.979903	-1.4933	-1.22033	-2.8188
152.6	-2.05741	-2.24831	-1.06944	2.96542	0.378095	0.977962	3.07373	4.49888
152.7	-1.46064	-1.03701	0.796103	0.517388	-0.223213	-0.823574	1.26088	-2.22303
152.8	0.964236	3.22209	2.04706	0.512944	-2.65326	-1.40186	-2.98839	-2.22529
152.9	-0.274113	1.98675	3.29428	1.11808	-3.85974	0.459948	-2.35243	-2.22843
153	3.36819	-1.07344	-0.950017	1.72195	-5.0646	-2.56016	-1.10933	-1.62272
153.1	0.906042	3.80126	1.51983	-4.99221	-1.99964	-0.086992	0.739596	0.810096
153.2	0.887938	-1.69725	0.934445	-5.59529	-0.161092	0.551456	-1.0751	1.40787
153.3	-4.00788	-1.08528	2.17767	2.33968	1.67288	-0.0316093	-0.448794	-1.04525
153.4	-2.79629	-0.472529	-2.07123	-4.98424	-0.15626	1.21484	-5.31309	0.163948
153.5	3.29109	0.140902	-6.92339	-2.53702	-4.42178	-2.42017	0.196287	0.759908
153.6	-0.998988	-3.51328	0.427063	-0.70363	1.07607	-0.561401	1.42478	0.134125
153.7	-1.01193	-1.67077	1.05381	1.12703	-1.9744	2.51184	0.21008	-2.93038
153.8	-2.85358	-0.440108	-2.59078	-4.97159	-0.141697	0.0898437	0.215482	-1.72151
153.9	-1.64227	-2.25925	-1.35201	1.74772	-5.02057	-2.32882	-2.21987	-0.51589
154	-2.87168	2.63357	-4.38575	0.528246	-0.134433	-3.52466	-2.82287	-1.14263
154.1	0.17044	-1.62858	1.73088	-3.73622	0.473328	-2.89038	-0.377626	0.0605199
154.2	1.37833	-4.05227	-0.0931694	-0.0641839	0.469783	-1.64904	-2.20714	-2.39766
154.3	-1.07345	0.846372	-6.18356	1.77277	0.46592	-1.02138	0.843305	-3.02209
154.4	-3.51905	-0.971527	-1.28807	2.38806	4.1203	2.65227	-1.60157	3.0617
154.5	-0.470614	2.70216	4.20585	-0.045133	-0.769141	0.219662	-0.384574	0.596844
154.6	-1.08509	2.10044	-1.89789	3.01566	4.10698	0.229444	-0.39082	-1.25333
154.7	1.35216	-0.329364	-1.2838	2.41335	0.437004	-1.59133	-1.61773	2.38802
154.8	1.34749	0.294184	2.3764	1.20386	-0.176796	3.29756	-1.01404	1.14437
154.9	-0.484357	-2.7423	0.540326	-1.22149	0.430415	-2.18993	-2.24169	-1.9257
155	-3.52979	0.324355	-0.683504	-1.81161	1.03679	-2.78932	0.190755	2.32778
155.1	-2.29847	-2.10314	-1.29615	-0.570227	1.03263	-3.99785	-4.69926	1.69542
155.2	0.152497	0.35171	-3.12793	-1.7693	-2.0198	-0.936097	0.175797	-3.20334
155.3	-1.66688	2.80108	0.530847	-2.96507	-3.23643	-0.319619	1.38216	-0.165082
155.4	0.788564	-0.242854	-1.91577	0.720339	1.03757	-0.314129	3.19542	-5.0589
155.5	1.41311	-2.06202	-2.5289	0.740626	-2.01335	-3.96693	1.95605	-0.186373
155.6	-1.00891	-1.43937	2.95613	-1.67755	0.430058	2.14383	-2.32976	-0.200742
155.7	0.8456	-2.64805	-1.9358	3.22646	1.03999	-0.903182	0.709884	-1.43378
155.8	2.7	3.46169	-2.55007	1.4138	-2.61883	-0.894718	-2.35386	-2.66351
155.9	0.285996	-0.197653	2.3244	-1.6147	-3.83072	3.38281	0.68622	-2.06068
156	2.14837	-3.85078	-2.56682	0.240662	-2.60046	-2.71276	-0.547492	2.81007
156.1	-1.47738	-0.790477	0.478347	-0.346955	1.06706	-2.6975	1.88029	-0.254622
156.2	1.61444	1.04323	1.68833	2.11479	-0.149952	0.367813	1.86495	-2.09277
156.3	-1.39439	-2.00567	-0.152667	-2.74602	-0.144347	-1.44946	1.85046	2.78095
156.4	-0.736012	-2.00083	1.66872	1.54805	-0.138146	1.00667	0.617413	3.37776
156.5	1.14324	-0.167827	1.0478	-3.31371	-1.35093	3.45953	0.607208	0.315911
156.6	-0.027378	-1.38821	0.428372	0.369334	-1.34129	1.03114	-3.06052	0.919702
156.7	-0.583491	-3.21696	2.24949	-3.27331	0.498029	-0.171299	-0.0127936	0.304022
156.8	-3.57519	-1.99439	-5.6885	-5.08106	1.11465	-0.150218	-1.84812	2.12982
156.9	0.148288	1.05394	-0.805637	-0.179697	2.34011	1.09186	-0.630141	-2.75392
157	2.03688	0.436712	1.0192	-0.167818	-1.3146	1.72325	1.19605	-5.18758
157.1	-0.954778	-0.180271	-2.64692	2.89083	0.525856	-0.0841087	-0.0293136	0.311678
157.2	1.54837	-0.187097	-2.03718	-1.98534	-1.29565	-0.0572986	-0.641782	0.313634
157.3	-0.830563	-0.194597	4.0594	-1.976	-1.28411	0.580349	-0.642679	-0.902644
157.4	-1.98473	-2.03194	0.388249	-0.139695	-1.27237	0.607984	-1.25287	-3.94451
157.5	-0.697365	-3.86616	0.992796	-0.748402	-0.650727	-2.41229	1.79691	0.337831
157.6	-1.24182	-0.209422	-1.45247	1.08068	-4.2984	-4.81614	-0.646907	0.34453
157.7	1.87295	-2.04795	-2.06362	-1.3644	-1.84127	-0.507523	-1.86623	-2.08678
157.8	-7.21406	-2.05378	-0.234626	-1.36789	-3.65718	2.5733	-3.08307	1.58507
157.9	-2.86957	-2.05962	1.59061	1.6751	0.0182346	0.160333	-1.24885	0.982106
158	5.12346	1.59314	0.363295	-0.777975	-1.19173	-2.24804	-1.8575	-2.05821
158.1	2.73341	4.01934	2.18677	-3.83823	2.47847	-0.993646	-1.85551	-0.21428
158.2	-5.14144	4.00203	1.56713	-0.797309	1.26317	0.257489	2.41431	-0.812875
158.3	1.63113	0.936437	-2.10067	-0.20389	1.26955	0.285637	-3.08073	2.85795
158.4	-0.148687	0.926128	-3.32299	-0.223834	0.0562301	0.922274	-0.638751	1.03367
158.5	-3.14726	2.74565	-2.1048	-1.46562	-1.76456	-0.882731	-0.0315858	-2.00676
158.6	1.17403	-0.315749	-3.32908	0.341377	-2.97215	0.972624	1.18326	-1.38306
158.7	-0.613958	0.897833	-0.893725	0.922981	-1.12869	-0.836221	-1.26371	-1.37087
158.8	1.86638	-2.15849	-0.293754	-1.54746	0.711068	-4.47302	-3.09706	1.68932
158.9	-3.58855	-0.939746	-0.915853	-1.57597	0.10818	-3.22716	-0.0498178	-3.79389
159	-1.71953	-0.942063	0.291054	2.05229	-1.71303	-2.59627	1.16111	1.09845
159.1	-1.68741	-1.55321	-3.3839	-1.64511	-1.09171	1.07906	-0.680223	1.10197
159.2	-1.65935	-0.332945	-0.955564	-0.458524	3.79658	-0.134137	2.96862	-1.94446
159.3	0.80364	-3.99212	-0.362664	-1.10468	-0.470977	0.480876	-0.707961	1.11126
159.4	-2.22999	-1.5456	2.66666	1.29821	1.97721	0.481365	0.499517	-0.108789
159.5	-1.60312	0.897094	0.200918	-3.62138	-1.06707	-1.96072	-2.56479	-2.54738
159.6	-1.59121	-1.54192	-1.04159	1.83396	-0.446715	-0.743038	-1.35587	2.94409
159.7	1.46551	0.903076	-3.50205	3.01002	-0.437227	-2.58007	-0.760116	-0.113382
159.8	-2.80454	-2.14334	1.35851	-0.0844495	-1.03737	-2.58778	-3.2152	-1.33714
159.9	-3.41119	-3.35336	-1.10817	-3.78227	2.02226	-0.769747	1.65068	-3.16974
160	-0.971306	-3.34042	-1.13141	1.67379	-1.63127	-1.39773	0.408605	0.487467
160.1	2.67994	0.941686	-0.545203	-4.46567	1.4298	0.41115	2.217	-0.132336
160.2	-4.04484	1.55769	-1.78961	-0.83639	-2.22225	0.383962	-0.24711	-0.752393
160.3	-2.83245	-0.875518	0.626797	-1.48187	0.230564	-1.47547	-2.09716	-0.153169
160.4	0.204159	0.965014	1.8189	-0.29607	-0.97989	-1.50482	-1.50498	-0.166275
160.5	-2.25532	-1.46573	-1.25949	0.278468	-2.79769	-2.14657	-2.13374	-0.790505
160.6	-0.443774	2.20623	-3.1121	-0.9764	-1.56327	0.868885	1.50682	-0.805131
160.7	-1.07661	-0.836044	0.52696	2.04049	-0.941218	1.43707	-0.957385	-4.47948
160.8	3.16829	-0.213639	-1.93826	2.00378	-2.75963	-1.04661	-1.58741	0.388686
160.9	0.08665	-2.03134	1.0896	-0.470584	1.52267	-4.13683	-1.60624	-0.851354
161	1.88824	0.422805	-0.765947	3.15871	0.308201	0.0946077	2.03376	1.56856
161.1	0.636983	-1.39627	-0.178095	-2.36407	-3.95327	1.26772	-2.86951	-2.72436
161.2	2.43667	-1.38279	0.409443	2.49114	-0.28033	-0.611179	-1.05538	-0.911951
161.3	-1.86465	2.28883	-1.44219	-0.588589	3.99427	1.78126	0.755719	-2.15244
161.4	-4.32794	-1.97387	4.02789	-3.66077	-0.886641	0.510187	1.95409	-0.951925
161.5	2.36029	2.30792	0.951815	1.20121	-2.10031	0.461135	-2.33698	-2.19309
161.6	-3.15901	1.09297	-3.94614	0.5671	-2.09313	-3.24593	0.0883733	-0.383351
161.7	-0.739745	1.09935	-0.906374	-0.0645527	-1.47733	0.981757	0.68033	2.03228
161.8	2.28557	-0.114427	0.909211	-3.74253	2.18481	0.933755	3.10098	-1.04474
161.9	-0.791333	-0.106999	-0.936015	-1.31469	-1.4785	-2.77148	-0.58004	-1.67667
162	1.62696	-3.14896	0.272365	3.54826	-1.47733	-0.980294	3.06368	0.741471
162.1	-1.44567	-6.18549	2.08931	-2.57291	-1.47751	1.41864	-0.00664988	1.32565
162.2	2.19679	1.75876	-2.19363	-1.36399	-4.52784	-0.453678	-2.46074	-1.13995
162.3	0.346128	-0.0694341	2.06944	0.453234	-0.866455	-2.32041	-0.0316212	0.667747
162.4	-1.49902	-0.0655259	2.05684	-1.3907	2.17625	0.0867818	-0.655783	-0.576594
162.5	-3.94844	-3.11114	-0.393738	-4.44955	0.942901	-1.16715	-4.32724	2.45009
162.6	-0.903503	-1.27355	-2.22886	-2.01368	1.53935	1.8518	-1.89381	0.593186
162.7	-0.911589	0.559528	0.818285	-2.63042	-2.13561	-0.620859	1.75441	-0.649852
162.8	1.52108	-1.2704	-1.01809	3.46222	1.51161	-1.25727	-1.92148	2.98803
162.9	-2.14689	2.99985	2.63727	2.83642	-0.338259	1.76823	-3.15112	2.35101
163	1.51085	-0.665945	0.188189	-1.44572	-0.96712	-0.0881075	-1.32971	-2.55231
163.1	-0.324961	-0.666763	-1.03645	1.59845	-0.37734	1.71974	-1.95108	0.481577
163.2	0.89301	-1.27797	1.39976	0.978881	-0.400494	-1.96183	1.69677	-3.80664
163.3	-0.329136	-2.49819	-3.48602	-2.07771	0.793934	-3.80508	-0.15058	1.67056
163.4	-2.15745	-1.88717	-2.26501	1.57966	-1.67441	1.67393	1.66393	-1.39855
163.5	0.28714	0.551465	-1.65677	0.962245	-0.481241	1.6558	-0.183922	-2.02147
163.6	-0.93069	-0.0638015	0.168902	-0.872714	-4.17023	4.68771	2.23984	1.01651
163.7	-1.53559	-1.89763	-1.05881	-1.4838	1.29249	-0.821791	-0.219463	-0.828245
163.8	0.30033	-0.0695685	-1.06573	-5.14157	-1.18411	-2.05122	-3.8936	-1.44851
163.9	-0.915631	-0.684312	-1.07384	0.354966	3.0497	-0.228815	-0.243704	0.372886
164	-2.73863	0.531175	-3.52218	-1.4755	-0.653153	-0.238788	1.56949	-1.46625
164.1	0.31999	0.52447	-1.08896	-0.252627	-1.30137	-2.07763	0.330168	-1.47087
164.2	-0.286098	-1.92156	-1.71058	2.18841	1.09907	0.355632	-0.297092	2.79447
164.3	-1.50098	-0.0949409	-0.503011	3.40634	-1.3844	-1.484	-1.53294	-3.31256
164.4	0.334963	-1.93093	-0.51857	-1.47432	1.62376	-1.49067	-0.937167	-2.69842
164.5	-0.881913	-1.32486	-4.19367	-3.29523	-0.252863	-3.32658	-4.00112	3.40407
164.6	0.342047	-0.110804	-1.15523	-2.67215	-2.1265	0.938549	1.47738	0.959867
164.7	-2.09557	2.31979	-0.562582	-0.219609	-1.55809	-2.12186	-3.42069	-3.91656
164.8	0.348918	-1.35252	1.24769	-0.209346	-2.21084	-0.908166	2.66647	-1.46436
164.9	0.958543	-0.749978	-1.21442	1.63176	-4.69197	-0.306936	-1.01418	-1.45403
165	-0.872942	0.460399	1.81568	-3.23639	-2.29049	-3.3657	0.190876	1.60698
165.1	-1.48226	1.66759	1.18111	2.27242	-3.55246	-3.36991	0.784437	-3.26278
165.2	-1.48154	-0.17714	-0.671654	-0.154717	-0.543779	-0.935258	-2.28078	-1.41364
165.3	0.347455	0.419982	1.13798	-0.136401	-1.80924	1.49451	0.148952	-2.00517
165.4	-0.267225	-0.204345	1.11526	0.493313	4.24492	3.9195	0.745945	2.28443
165.5	1.5572	1.61082	1.70308	-1.31543	-1.29786	-0.977183	2.56276	-1.35919
165.6	-2.72055	-2.67579	0.461521	1.75924	0.487628	-0.986025	-3.54899	1.71368
165.7	-0.283695	-3.9058	-0.166568	-1.26773	1.05045	-0.994598	-3.54922	-1.31495
165.8	-2.12099	0.963572	-0.182181	-0.628311	0.393109	-1.00274	-2.32783	-3.11608
165.9	0.31261	-0.884416	-0.196009	-1.20776	1.56678	3.25796	-1.10658	1.79548
166	-2.13747	0.319499	-5.08576	0.0449581	-0.310043	-1.6353	2.55367	-0.617756
166.1	-1.53467	-0.918448	1.0119	-0.532344	-2.79217	-0.42062	0.111768	1.85365
166.2	-1.54344	-5.20313	-1.43648	-3.54587	0.828862	-6.52437	0.116381	-0.556011
166.3	1.49592	-0.94331	-0.218781	0.765033	-2.26368	3.23841	1.34326	2.52853
166.4	-0.959056	-0.350766	-0.220078	3.23956	3.18729	-2.26065	-2.91714	3.77934
166.5	-0.361084	2.06954	-1.43774	0.222679	-0.517756	-0.430491	1.37033	3.2
166.6	-2.20388	-2.22241	-0.820401	0.261572	-2.9949	-0.431677	-1.66458	-1.03518
166.7	-2.21433	-0.408566	-0.200817	-2.74738	0.0216415	0.17859	-0.422118	-3.43135
166.8	0.823442	-1.03744	0.421034	2.17717	0.594309	0.789488	0.821013	-3.99219
166.9	-0.413556	-4.10413	-2.00357	-0.834086	0.557263	-1.0378	5.11356	2.15656
167	-4.08754	2.59121	-0.761414	-1.39991	-1.30776	0.189448	0.254558	-3.90068
167.1	0.172024	3.78561	0.481696	0.474717	-0.728917	-2.24187	-6.42091	4.0793
167.2	4.42266	-0.509997	1.11591	-1.31261	2.89865	2.0413	3.38302	-1.97976
167.3	1.34746	0.690763	1.14229	-1.87689	-2.01631	-3.43741	-0.853847	-0.708917
167.4	-0.502514	-2.98863	-0.657592	0.608474	2.22583	-1.58569	0.408075	-1.269
167.5	1.30933	0.0467775	3.64644	-4.83822	-0.246449	1.48445	-0.768991	2.44096
167.6	-2.98021	1.24728	1.23739	1.92011	-2.10275	2.72186	-4.38045	0.656429
167.7	0.0554335	1.22631	-2.99371	0.737362	-0.295444	-3.96729	1.77322	0.0953975
167.8	0.645781	-2.45262	-2.946	-0.44424	0.290262	0.944558	-0.0101821	0.755285
167.9	-0.594508	-2.46518	4.42052	0.204378	-2.17242	3.41016	0.0408471	-4.68343
168	2.43572	-0.647799	-0.420824	1.45997	-2.18966	0.995333	0.093141	0.254323
168.1	-3.68638	-2.49167	2.06581	0.272468	-0.376029	1.63638	0.146432	-5.79339
168.2	0.569311	-0.67242	-2.76831	-0.914457	1.43563	-0.770306	-0.409264	4.63361
168.3	-2.50041	1.14425	0.944468	3.38682	0.806345	2.31768	1.47584	-0.204399
168.4	-0.686015	-1.9196	0.991869	-5.12706	-3.47847	1.74307	-3.95919	-1.98493
168.5	-1.92387	-1.31775	1.64897	2.22723	0.783442	-0.0480345	2.81179	-1.324
168.6	-0.110427	-2.54509	-3.18328	-3.84973	-2.27826	0.605167	0.423198	-4.32416
168.7	-1.34915	-3.15888	-0.689635	-1.38056	1.98483	-3.00948	-4.39978	1.21662
168.8	1.68303	-0.72132	-0.0311594	1.08116	-1.68546	0.0917111	1.15214	-3.62089
168.9	-0.168484	1.10307	-1.81428	-2.56208	-3.51729	-5.34852	1.20465	-1.74342
169	2.25221	2.92535	-1.15646	-1.93262	0.754053	-0.411431	1.25606	0.738084
169.1	-3.25827	1.69686	-2.3311	-6.18521	-1.68812	-2.19079	-1.13289	0.163748
169.2	-5.099	1.0822	1.37238	-0.0665431	-0.464734	0.301765	2.57877	0.197925
169.3	-0.228608	-0.13926	-2.86058	1.76895	-2.29018	-0.25957	0.793441	0.229551
169.4	-0.245601	-0.137001	-0.380445	1.15913	0.768349	-2.03983	0.83872	1.47801
169.5	-1.48182	-1.96215	-3.39554	-1.89108	-0.444988	-2.59795	-0.947765	0.282283
169.6	-0.27639	0.486326	-2.74891	-0.669589	0.785558	-0.107417	-3.95291	-2.13335
169.7	-2.12184	4.15115	1.55201	0.546965	-0.422843	1.15723	-0.857607	-0.88854
169.8	0.914553	-1.94555	0.963455	1.14894	-2.2361	-0.0213212	-5.69831	0.960586
169.9	1.50607	-0.101809	-2.67565	0.527993	1.44444	-1.80921	-3.82548	-3.29443
170	-3.39119	-1.30896	-0.822811	-3.75223	0.242144	-4.81514	0.479302	-0.227032
170.1	-0.961661	2.97539	-2.02528	-0.70887	-2.17485	-0.50046	-4.98382	1.00213
170.2	2.68261	-0.674154	1.04007	1.10729	-1.53595	-1.07484	-1.90313	0.396733
170.3	0.83194	-2.48604	-1.39101	-3.78874	0.32353	0.178541	-1.27106	-0.820043
170.4	-0.405318	-0.634857	-0.771052	-1.96905	0.352404	1.42668	-1.8632	-2.64691
170.5	-0.420651	-0.00597703	-2.59363	-1.9832	-0.226196	0.230536	-1.84778	-3.86308
170.6	2.61281	-6.69463	0.463229	-0.168836	1.63768	0.253366	3.04227	1.62788
170.7	-4.72529	-1.17467	-1.97569	2.86092	-0.158354	-1.55609	-1.22685	-0.82105
170.8	1.97552	1.2857	-0.753063	2.22594	2.31963	-3.36503	-1.22248	1.61074
170.9	-5.36086	0.082575	-0.753907	2.20196	-1.91232	3.36298	1.8275	-0.842219
171	-2.92637	0.710719	-1.3658	-0.260765	-1.25577	-0.291105	1.81975	-0.243326
171.1	2.55238	0.117605	-0.758034	-0.888976	-0.598525	1.54677	0.589854	2.18206
171.2	1.31339	-2.3042	-0.152263	-2.7348	1.88846	0.939032	-2.46922	-2.10598
171.3	1.29676	-1.06356	-0.157905	-0.307867	0.713679	-2.10943	3.62179	0.320416
171.4	-2.37771	0.783288	-0.773407	0.895885	-1.67675	-0.886476	-1.88638	-2.74685
171.5	0.663109	0.795968	-2.60701	-2.77927	0.207137	-3.93686	-3.72683	2.11763
171.6	-3.0084	-1.63177	-1.9975	-1.56746	-0.35048	-3.93496	1.14215	0.264327
171.7	1.86483	1.43143	3.48945	-0.96598	-2.12546	0.942622	1.1223	-2.80561
171.8	1.85147	-1.61062	2.25923	-2.19302	2.20136	-1.50853	-1.33739	-0.992331
171.9	-1.81916	-5.2581	1.64239	0.852676	-0.796688	-6.39566	-1.35379	2.03606
172	2.44552	-0.363634	1.02814	-1.59316	2.91888	1.52993	1.67835	-2.25918
172.1	-0.00400992	-2.1878	2.85562	-2.20259	-1.29941	-0.317555	0.436349	-2.88792
172.2	-2.44708	3.91674	-0.196843	3.89872	-1.2411	0.276414	-0.193054	-2.29625
172.3	-2.44455	-0.967858	-0.192847	0.234265	-1.18308	1.47795	-2.64975	-1.70589
172.4	-0.610889	-0.356598	-0.796859	2.06706	0.0939089	0.23735	0.996917	0.712469
172.5	-4.87633	-0.967534	1.0411	0.849696	-3.51025	2.0474	-0.850029	0.0774154
172.6	1.23449	0.860297	-1.391	0.856295	-2.23013	0.804831	-1.47222	0.0537048
172.7	0.628133	0.244183	-4.42623	-0.354682	0.875607	-1.04505	-1.4817	-1.79873
172.8	-1.80403	-0.98165	0.47299	2.70682	-0.29437	0.157621	0.949687	1.84075
172.9	-0.57056	0.23279	0.486106	-2.77246	-2.07324	-2.30031	-0.889908	0.595646
173	-0.556668	-5.26348	-1.93831	-0.312563	-0.801443	1.9543	0.934839	-0.646321
173.1	-0.540459	-2.21341	-2.52736	-0.295065	-0.14374	-3.55477	-3.3392	-1.88505
173.2	-0.522019	3.87846	-0.0653699	-4.54456	0.510593	-3.56435	-3.33414	-0.681516
173.3	-1.11116	-2.84715	3.61207	-0.857851	-3.10683	-0.52421	0.941561	-0.698954
173.4	-2.30676	-1.0235	-0.64394	2.21264	-2.45119	0.0719948	1.55273	2.33342
173.5	1.38001	-1.64284	1.81603	1.00939	1.85911	-3.60004	-1.49344	-0.736585
173.6	-3.475	-1.04171	-1.82621	1.02837	0.06077	1.88259	0.346652	-1.97017
173.7	0.21801	2.60684	2.46533	-2.61107	-1.12693	-0.571157	-2.69266	0.458283
173.8	-2.80164	-0.458986	-2.39828	-1.36548	-6.58318	3.07865	2.81258	1.66362
173.9	3.33273	-4.73793	0.673772	3.53582	0.163639	-1.2043	0.382104	-0.790682
174	-2.12851	1.96753	0.080308	1.10996	-0.422646	3.05887	3.44592	2.24885
174.1	4.61761	-2.31504	-1.12294	-3.141	-2.83975	3.04652	2.84672	-0.204059
174.2	1.5958	-4.14923	-1.10579	-0.677174	0.232945	1.20615	-0.188956	-0.211697
174.3	-0.199336	-1.71053	-3.52938	-2.48748	-0.361607	-0.629411	-1.38828	-2.04713
174.4	2.27829	-0.494962	-2.9014	-0.02705	-0.347859	-1.24071	0.46433	-0.828755
174.5	-3.17484	3.76825	3.2108	-3.06032	0.273052	-2.45945	0.484573	1.6081
174.6	0.52974	1.31724	0.772045	0.00874771	-0.329215	-1.23576	1.11477	0.383005
174.7	0.569029	-0.517623	0.16481	-0.587951	-1.54232	-0.62328	-1.30509	0.381071
174.8	2.43789	1.31126	1.38537	-1.79446	0.293594	-2.45009	-3.72056	-3.27823
174.9	-0.574587	1.30889	-1.66741	-0.560893	0.294643	-1.83345	-1.2541	-3.88052
175	-1.75155	-1.13091	-3.49742	0.0591545	-0.315895	0.611899	-0.0132737	1.00697
175.1	0.732475	0.0942007	-1.05845	-2.37216	-0.317137	-3.04453	0.613797	-2.04119
175.2	-1.05666	1.31855	-2.89546	-0.531913	1.5093	-0.595768	-2.42074	0.40505
175.3	1.42586	-1.72601	0.146186	1.91291	0.89172	3.06804	-6.06122	-0.20173
175.4	-1.5845	-0.494657	-3.52832	-1.74617	0.274093	1.23718	1.88831	0.412643
175.5	-4.58922	3.17479	3.77704	-1.13146	-1.56295	-1.19958	1.28298	-4.46165
175.6	-4.53971	0.13123	-2.95903	-1.12942	2.09031	1.24662	-0.543504	-0.180033
175.7	-0.222659	0.143716	-2.97717	-1.73877	-4.02051	-1.79967	-1.14986	-2.61426
175.8	-3.84163	1.98649	-1.16851	0.0905022	-0.363972	-1.79117	-0.53857	-0.165997
175.9	0.472397	-2.27088	-3.02422	1.30492	-0.373739	-0.563317	-2.9804	-1.99131
176	3.55731	-2.86042	-3.6589	-0.533226	0.83553	-1.16732	-1.15238	2.89353
176.1	1.14713	-3.4479	-0.635798	-2.36911	-1.00676	-1.16059	0.0590482	3.49953
176.2	-3.08885	0.234769	-3.10818	-3.59302	-1.01651	-1.15415	1.26483	-0.16497
176.3	-6.09828	2.6913	-1.30893	-1.76725	-1.63632	-0.538314	-1.19356	2.88382
176.4	-0.566688	0.875233	-0.124258	-1.77587	0.183881	-2.36302	1.22763	4.09601
176.5	-0.535345	2.11184	-0.162405	0.653018	-2.87764	-2.96494	-1.84684	-1.4028
176.6	0.713747	-0.312272	2.84756	4.29511	0.16433	-1.127	0.569492	1.64422
176.7	1.34886	-2.73152	-0.856066	-1.82737	-2.28736	1.92639	-3.72903	-2.63335
176.8	-2.28727	-6.36562	0.935294	-2.45131	-0.465812	-1.12414	-0.7047	-2.0261
176.9	-0.430182	-3.28558	0.284415	-0.636284	1.96203	-1.72991	1.0917	-3.25099
177	-4.06617	-1.43166	0.855018	-0.0455733	-1.10242	-0.50549	-5.65408	-2.64592
177.1	1.44957	0.417918	4.47425	3.59151	0.107729	1.93579	-2.02271	-2.65352
177.2	0.245428	-0.785703	5.03888	1.12274	-1.73294	0.103907	-3.27812	-0.223842
177.3	1.4809	-1.37806	-3.54218	-1.95192	1.30829	-2.33407	-1.48367	-0.849427
177.4	-2.77564	-2.5799	0.700307	3.51508	0.685214	-1.10863	-1.52325	-5.13389
177.5	-2.14764	-0.121888	1.88764	1.65348	-2.37542	1.33406	0.265503	-0.874922
177.6	1.52599	-0.108886	-2.41294	-0.205081	0.667592	-0.496044	3.26946	3.98391
177.7	-5.17515	-1.31664	-1.8247	-0.23126	-1.78315	1.33635	1.38901	-0.314441
177.8	0.939963	2.96436	-1.23529	-0.2578	-3.61934	3.16559	-3.53666	0.882196
177.9	0.334052	-0.691266	3.62346	-2.72359	-1.79347	-2.32522	3.74246	-3.41243
178	3.99587	-0.0728712	-1.28105	0.912721	3.07737	-1.09738	-1.18742	-2.2119
178.1	-0.887647	-2.50594	1.14345	1.49293	3.67001	0.12854	-0.619249	0.814496
178.2	0.944237	-0.0577726	2.34595	-2.80598	-1.22669	-2.30596	1.16803	-0.434264
178.3	0.332187	-0.0549895	-0.719954	2.04986	-0.0167652	0.752479	-0.705754	-2.29109
178.4	-2.10905	0.556056	-2.55807	-2.85978	-0.639118	0.756462	2.91311	3.17207
178.5	-2.10748	0.554725	-1.95137	-0.442532	-1.26097	0.151056	-0.180933	-1.13206
178.6	-0.887304	-1.88696	-3.17302	0.141031	-3.10184	-2.28206	-3.26709	-2.98907
178.7	-2.71903	-3.10564	1.09736	-4.15406	-1.89107	-1.05165	0.362023	-0.574485
178.8	0.939981	1.16465	-3.1755	-2.95242	-0.683477	-1.04299	-0.892003	-0.603889
178.9	0.323	-0.672024	-0.731147	-0.533202	0.520799	-3.47322	2.73652	-0.0235801
179	2.75562	1.76218	0.490175	-2.38645	-1.93678	-1.63036	-0.34718	-2.49315
179.1	-0.304507	1.14186	-1.33855	-2.40613	0.487539	-1.01066	-1.59325	-1.29923
179.2	-0.30988	-1.30731	0.495656	1.23334	-0.752399	2.65647	2.0434	2.33158
179.3	-0.315169	-2.53293	3.54623	-3.67024	0.448186	-1.00078	-1.64191	-0.751558
179.4	-2.75932	-1.31795	-3.77475	-0.0269868	-0.18375	-0.992573	0.16993	1.65975
179.5	2.1185	-1.93532	-1.9351	-3.70725	-0.815301	0.234617	-2.89775	0.408523
179.6	-3.37878	-0.113054	-0.709108	-0.0625388	-2.66587	0.239166	-1.07941	2.20938
179.7	-1.54794	2.31491	-1.31528	1.74642	-2.68419	1.46229	1.9567	-0.870211
179.8	-5.20821	3.51819	0.517951	-0.105983	1.56521	0.242938	1.33004	0.32582
179.9	0.285241	-1.9884	1.12703	-0.124766	-1.51125	3.29295	0.706165	-1.52788
180	-2.15867	-3.82576	-0.705341	1.07673	0.905756	-4.03019	0.0848708	-0.327621
180.1	2.10958	-5.04984	1.73269	-0.162384	0.268951	-2.19407	3.73422	-0.957324
180.2	-0.337813	-0.783794	-0.713701	1.65047	-2.19605	0.246539	-2.98831	-2.19382
180.3	0.878078	1.64456	-0.108281	2.24103	2.05091	2.68056	-2.98952	-0.377362
180.4	-2.78651	-0.809811	-1.94496	0.392315	2.02117	0.229998	3.71699	1.4374
180.5	-0.346587	1.61874	-1.34104	-2.0615	0.772013	-0.998033	0.65455	0.201845
180.6	-0.350855	2.21338	-0.740395	-0.850955	-3.52334	-2.22555	-3.62111	2.01955
180.7	1.47358	0.368056	-2.58201	-1.47099	-1.10286	-1.01363	-0.571258	1.39676
180.8	-2.80377	0.96557	2.28507	2.17955	0.0934667	-0.415856	-0.576304	0.16759
180.9	0.853258	-5.14511	-0.786384	0.336355	-0.541644	0.788448	-1.19134	1.9917
181	1.45338	-1.4877	0.414323	-0.892113	0.653998	-2.27989	-1.80554	0.765555
181.1	-1.60712	-0.276759	1.00083	2.76121	0.0183216	0.753312	1.8492	-1.67556
181.2	-1.00405	-2.7271	-3.29371	1.53074	1.21347	-1.09946	0.00832602	-3.49993
181.3	0.206507	2.14387	1.56474	0.30414	-3.69089	-5.9992	-3.0491	-3.48932
181.4	2.6329	0.907245	-2.73421	-1.52831	-1.26824	-3.57407	-4.88167	-1.64742
181.5	-0.434609	-2.15667	-2.75774	-2.13613	-4.33778	-1.76519	-4.27231	2.63185
181.6	-2.88771	3.93108	-0.343314	-1.52172	-4.35212	2.47748	-1.22587	-3.46106
181.7	-1.0692	-0.969367	-0.373445	-3.34586	1.73145	-1.82621	-0.625162	-2.83278
181.8	-4.74354	-2.20238	-3.45275	2.76203	1.09611	-4.9031	-2.46524	-0.374738
181.9	-1.09521	-0.994889	-3.47742	-0.89645	-3.19608	0.561545	-1.8632	0.250736
182	2.54421	-0.400583	0.156538	3.99043	1.05707	-0.0830595	-0.043187	-2.17242
182.1	0.0771863	-1.63778	-1.09436	-0.88668	-0.795273	-0.117465	-2.49522	-2.15065
182.2	0.0521677	0.175146	-1.73241	-3.3135	1.62472	1.06709	5.42319	-0.298656
182.3	3.07404	-2.28482	-0.538995	0.363587	-2.0571	-0.190075	2.96019	-2.10796
182.4	-3.66782	-0.472724	1.87271	-2.06251	2.19558	-0.225446	-3.15623	-0.254471
182.5	-1.86159	2.5542	0.0127464	-0.214033	-2.09611	-0.260782	2.93485	1.59587
182.6	-0.0607448	-1.13315	-3.06146	-4.46515	3.98682	-2.12515	-3.18037	1.61367
182.7	-0.0945039	1.89298	6.06715	-0.169911	-2.74662	-2.76594	0.473559	-0.197463
182.8	1.08954	-2.40478	2.37498	-0.150044	-1.53966	0.863336	-3.19532	4.09272
182.9	2.87937	-3.03633	-0.697923	-0.738706	2.71393	1.43741	2.90059	-0.771698
183	-3.26251	-1.838	-0.103836	-5.59328	3.30085	0.181945	2.88867	1.08064
183.1	-4.51549	-0.642525	-1.33756	-0.0714631	2.6674	3.19809	-1.38944	0.490034
183.2	-2.71839	1.15992	3.53131	0.562457	-1.01313	-1.71741	-3.2179	-3.14859
183.3	-2.75509	-4.96825	-3.80159	-0.0234597	-2.85674	0.69492	-1.38192	-0.68314
183.4	-0.963346	-1.32854	-0.141604	1.22185	-1.03788	-2.99377	-0.156876	2.99613
183.5	0.824043	2.30383	-0.754097	-3.63199	-2.27109	3.08219	-3.19987	-0.0399103
183.6	-3.4903	-3.21721	4.12535	3.10965	-2.89194	0.611217	1.08287	-0.0220112
183.7	1.34953	-2.6297	-0.148138	0.692258	1.36647	1.80533	3.53064	-0.00504989
183.8	-0.527891	0.395899	-4.41018	1.93855	-0.481055	-1.26925	2.92762	1.23042
183.9	-0.572616	2.19642	1.09516	-1.69531	-1.10549	-0.0673829	-1.32983	0.633192
184	-0.617311	-0.884056	-0.724438	1.38552	-0.509228	-1.30464	1.74098	-1.1834
184.1	-0.0520179	0.920271	1.12097	0.802036	-2.35309	-1.31756	2.36962	-4.82672
184.2	1.12224	0.892691	2.96557	-1.60931	-1.14451	-1.93765	-0.0488534	-2.97623
184.3	1.07517	1.47599	-0.67842	-0.357245	2.50075	1.71444	-1.24022	-2.9597
184.4	-3.23938	-0.989439	-4.31238	-1.54657	-2.39764	-0.735285	-1.81673	1.3241
184.5	-3.88606	0.209816	-0.00973016	0.315257	-2.40828	1.09104	-2.38947	-1.71832
184.6	4.00594	0.188745	2.45773	-0.265591	-4.24806	-1.96115	-0.519638	-6.5846
184.7	-1.53108	-0.440282	2.4838	4.64232	-0.596364	0.483601	-1.09025	3.19208
184.8	-1.56828	-1.67574	-2.36574	-3.26434	-0.00059337	1.09751	0.171586	-4.12402
184.9	2.66401	0.142308	-0.496162	-0.180081	-0.625381	-4.9937	-1.00619	-4.10904
185	-0.427748	-4.74792	-5.33538	1.06856	-0.0292267	-0.0940399	-1.57026	4.44202
185.1	0.146576	0.130127	-1.0169	-1.34409	1.7855	-0.0787061	3.35585	3.82962
185.2	-2.32736	-1.09632	0.246124	-0.0938996	-0.671242	-0.669857	1.56612	-2.26955
185.3	0.693048	-0.488451	0.288872	-3.11488	-0.683694	0.572651	-2.04842	-1.03991
185.4	-1.77842	-2.31797	-0.886399	-1.8621	0.523941	0.596368	1.66164	-1.03242
185.5	0.0251517	0.127353	0.381025	-0.612249	-0.0993176	0.0133794	-1.95246	-1.02502
185.6	0.607631	-1.69727	-1.40168	-1.19463	-0.110758	-1.78491	-1.29123	0.811611
185.7	-0.0284135	0.753204	1.69803	-1.77641	-1.95049	-2.35722	1.80726	1.42522
185.8	0.55856	0.153411	-1.30511	-2.35764	-1.95628	-1.70613	-3.02779	0.818381
185.9	-1.29226	8.09463	-0.0334924	0.110417	0.478063	0.165765	-0.537213	1.43253
186	1.13118	2.60904	-4.25171	0.74375	1.07965	-1.62206	-1.10154	0.216579
186.1	-2.54518	-1.03305	-0.534617	-1.67356	-1.36717	0.864177	5.04094	-0.996526
186.2	-0.724112	-2.83527	-1.09302	-0.428275	2.29002	-2.74989	-3.46443	0.232232
186.3	0.485951	-4.02076	0.788584	-0.40567	-0.155608	-0.867209	-2.80863	-0.979967
186.4	-0.133316	3.33587	0.836923	1.44533	-1.37486	-1.42565	-2.15622	-1.57959
186.5	-0.749006	-0.904008	-2.77377	-0.366764	-3.1993	1.067	0.931588	-2.17762
186.6	2.29741	-0.864104	3.37788	-1.56656	1.07959	-0.712547	-2.08671	-3.38378
186.7	-1.3671	-2.04073	-2.67861	0.283607	1.08407	-3.09756	-3.88213	2.12009
186.8	-0.753935	-1.38286	-0.797575	0.299584	1.70071	1.83963	-3.2376	-2.14254
186.9	1.07964	-0.113821	0.468593	-0.295572	-0.730006	5.54778	-1.37753	3.35955
187	1.08239	-1.28376	2.34042	2.76753	-2.54348	-0.507377	-1.35305	-3.95362
187.1	2.91634	-0.61985	-1.28085	-0.274369	-1.30189	-0.453217	1.10778	-1.49604
187.2	-3.17806	0.654493	0.591007	-0.262999	-1.27946	-1.00927	2.9515	2.17637
187.3	-4.99015	-1.12071	-1.81096	-1.47275	-2.47365	-0.955038	-3.74718	-0.865493
187.4	-1.30899	0.767539	1.27755	-0.852587	3.65444	1.53727	-1.28846	0.976902
187.5	2.36667	2.65322	-1.73956	-1.45495	-0.592334	0.36512	-1.88529	-1.45234
187.6	1.15874	-1.56141	-5.36241	-1.44827	1.87949	-2.63519	-3.09249	-1.43759
187.7	-5.53294	-2.71835	-0.443682	-0.224075	-2.35781	2.29561	1.7985	2.23577
187.8	-3.06367	-1.43386	-1.02446	-0.223811	-1.70573	1.72708	3.01979	2.24344
187.9	-1.20769	-3.81066	-0.38661	-1.44503	-1.05205	2.37716	-0.030906	0.42197
188	1.25564	-0.085973	1.46739	-3.27554	-1.00657	-0.634636	-1.85715	0.433389
188.1	-2.38217	2.41073	1.48636	-1.44593	-0.958383	-1.20376	1.19743	2.27397
188.2	0.695476	0.0230726	0.283704	2.81704	0.921643	1.27455	0.586966	0.452334
188.3	-0.500335	1.29691	-2.13814	-5.12534	-0.248324	-1.74232	1.80663	-0.756096
188.4	2.57519	1.34665	-3.94754	-0.249167	2.24471	-4.75579	-3.68348	-5.62095
188.5	-1.67177	0.174292	4.0004	1.56682	1.07631	0.77053	1.20299	-0.720668
188.6	-1.64158	-3.43754	0.954908	-0.890716	-0.697749	-5.91168	-0.0174815	-1.92815
188.7	-0.39156	-2.16738	-2.08671	2.75247	0.581958	-4.65654	-2.45464	-1.3047
188.8	-1.58271	2.14551	-0.856171	-4.5885	-0.578536	-2.79671	3.04034	1.75568
188.9	0.277477	0.348659	-0.239915	-3.37981	-4.17458	-0.333423	-3.05988	0.540789
189	-1.52428	-0.838747	0.982724	-0.345638	-2.27488	-1.53613	-2.43973	-1.89227
189.1	0.945978	-2.02776	-0.23818	0.242183	-0.988082	-0.909856	0.619303	1.7757
189.2	-0.246881	0.440002	-0.239245	3.26643	3.34524	-1.50696	0.0149894	-6.76004
189.3	-1.43709	1.06947	-2.68128	-0.423923	2.18234	1.55297	-1.8064	-2.47593
189.4	-2.62459	-6.84293	-1.46186	-2.27913	-2.02711	-1.49317	0.0354228	-4.29974
189.5	2.89774	-0.109966	-2.07597	1.96541	-0.131115	0.342261	0.655098	4.24371
189.6	2.31178	-4.37013	-2.08095	3.76112	-0.678515	-1.48676	0.664727	-3.08537
189.7	-1.32164	-3.74824	-1.47789	1.28362	1.2132	0.344131	0.67521	1.18289
189.8	-0.0697199	0.526515	1.56136	-0.580575	-1.77801	-0.269683	1.29618	-4.3157
189.9	-1.25914	-1.309	3.98327	-1.22291	0.113255	-2.10375	2.52629	2.99885
190	-0.616799	0.513387	-2.74733	3.01266	-1.04961	-1.49711	-2.95278	1.15024
190.1	0.634141	4.15724	-4.58808	-1.29783	0.836738	-0.893451	-0.49399	1.13213
190.2	0.663182	2.30208	-1.5487	-2.55213	-2.77037	0.926887	-1.0887	1.11177
190.3	-0.527287	-4.4312	-0.346061	-3.80494	-2.10426	2.74211	3.19569	-1.34969
190.4	-0.495956	-1.39876	-0.976403	-2.00747	-0.832059	-2.15476	-1.06513	-2.58888
190.5	-2.9038	-2.6439	4.49073	-2.65347	1.65461	-3.99431	-2.879	2.26984
190.6	-2.25835	0.37858	-5.90757	-2.07943	-4.40267	-0.343479	0.797654	-4.46819
190.7	-3.44363	0.343549	0.786552	-1.5071	-0.694647	0.250596	-5.29001	1.00034
190.8	1.47069	-3.96211	0.149486	-2.7656	-0.0455059	0.233144	2.04755	0.359012
190.9	-1.55165	-0.944419	0.122638	0.856016	-3.66878	-2.22367	0.222868	-1.50187
191	2.13898	-3.42224	-2.34382	-0.407688	-2.40988	1.42162	0.229347	-0.921191
191.1	0.944028	-1.62832	-1.14756	-0.449302	-2.37595	0.791362	0.233908	-2.17184
191.2	1.58032	-1.05845	0.655388	0.72893	0.0938829	-1.05704	-2.20264	-0.981763
191.3	-0.833789	1.94853	0.015182	1.90528	-1.71246	1.36672	-4.02689	0.815153
191.4	-5.07279	1.29058	-0.0145093	0.0312388	-0.46949	1.3471	3.29613	0.778934
191.5	-1.98688	-1.19546	5.44313	-2.4479	-0.451447	2.54753	-1.59304	-0.476827
191.6	2.31197	-0.017861	0.523813	1.17646	1.39284	-1.13174	-2.20717	0.0991935
191.7	-1.32479	-1.28101	-0.727628	-0.692805	-0.427932	0.0750718	0.22557	1.28402
191.8	-3.12551	-1.93099	-0.147624	1.71128	0.800822	-1.15869	1.43078	0.637663
191.9	0.564574	-0.749126	-2.61775	-1.9853	0.80492	-0.559915	-3.46713	-2.44577
192	1.80787	1.65154	-0.814897	2.25384	1.41608	-2.40041	-0.431917	2.40446
192.1	-4.87847	1.00058	0.374603	-2.05004	-2.2448	1.2513	-1.6742	-1.9001
192.2	-1.79608	-0.256766	0.342276	0.363768	-1.6327	-0.591179	-1.08792	-2.53659
192.3	2.49911	-2.11906	0.310085	-0.883643	0.195356	1.22914	0.103903	-3.78036
192.4	-2.36113	-0.926376	-2.16092	2.7515	-0.421334	-0.00233549	-1.75835	2.29658
192.5	1.93367	2.09598	-4.01711	-2.15486	0.790505	-0.621179	1.25816	1.6556
192.6	-1.70755	0.847116	0.837835	-0.951842	-4.0992	3.02982	-1.22182	0.407538
192.7	0.755111	5.70134	-0.414092	-1.57827	-0.444133	-1.25287	-1.26064	-2.05616
192.8	0.163246	0.18344	1.99517	-0.372	-1.06568	-2.47818	-1.9117	-2.07455
192.9	-1.03818	-1.66184	-0.47805	-1.60481	-0.467441	-1.26208	-1.95403	0.957332
193	-2.84797	-1.06126	-2.94601	-1.00354	-0.480925	1.78064	-3.21784	-2.11276
193.1	0.832538	-0.458705	-2.35993	0.818398	1.94401	-0.67078	-3.26151	-5.78506
193.2	-2.2025	-3.51269	0.0546361	1.41946	1.315	-4.3374	1.57119	2.1365
193.3	2.69407	1.97897	1.24536	-2.24672	-2.36167	-4.339	0.905178	0.897521
193.4	2.70175	3.80431	0.60493	-2.85471	-1.76279	-2.51226	-0.370371	2.10131
193.5	-2.16975	0.141272	-0.643575	0.808793	-1.1649	-2.51949	-1.0345	-1.57401
193.6	0.284134	0.75656	-0.0599664	-1.02071	-1.78729	-1.91818	0.741038	-0.972615
193.7	1.51233	-1.67555	-3.74527	-1.01547	-1.7982	-0.0999407	-0.536041	0.848196
193.8	-3.36074	-0.442115	-0.715552	1.43047	0.630403	-0.116062	-3.03025	-0.382312
193.9	-1.51826	-2.86759	3.52821	0.824347	-0.603739	2.91491	-0.641419	0.21981
194	-5.77818	-4.67674	-1.99174	3.87912	0.604074	-2.59833	2.35283	1.43138
194.1	0.334768	-0.383326	1.03644	2.66061	-1.23879	2.87298	1.07355	2.03159
194.2	-3.32159	-0.365449	-3.86731	0.225846	-0.638594	-3.25357	1.62685	2.63133
194.3	-0.874355	-2.78566	-1.44353	-0.983874	1.79013	0.386166	4.00933	-2.86693
194.4	1.56695	2.1165	0.366594	0.2484	-2.49263	1.57797	-1.53845	2.01193
194.5	4.00239	0.911727	-1.48439	0.868908	1.16031	-3.94143	-3.4154	1.39378
194.6	-3.3239	0.928738	-0.28194	1.48844	-0.0715295	-0.305274	0.200597	0.777181
194.7	-0.88056	-1.49364	-0.300312	-2.16134	-0.0811161	1.49292	0.152601	-0.447597
194.8	-1.49164	-3.30212	1.51171	0.903301	0.519296	1.45688	1.32598	-5.32805
194.9	-0.273043	-1.44942	-2.16631	-3.3553	1.11859	-0.40959	0.0599253	-1.05224
195	2.1619	2.2278	0.26191	-3.94742	-1.33213	-2.88326	0.0178524	1.99593
195.1	-1.50614	-1.42044	3.29666	-2.10009	-0.119734	1.96389	1.80715	-2.27855
195.2	0.320181	-2.014	1.44901	-1.47683	-0.739303	0.0933314	-1.89271	-2.88575
195.3	2.14231	-1.99802	-4.66154	1.583	-0.138556	-3.60346	-0.095342	-0.442727
195.4	-0.307906	-0.764102	1.43664	-1.46209	-0.149248	4.2918	-0.128548	-1.05304
195.5	0.294983	0.465688	1.42694	-4.50274	-5.03847	-3.68227	2.88931	0.167278
195.6	-3.98179	0.47173	-2.84924	0.997261	1.05682	-3.10424	-2.63305	-5.32189
195.7	-0.933667	-0.743591	-2.84698	-0.222816	-0.177626	-2.5273	-3.26424	1.39486
195.8	-3.37983	2.30984	-2.23329	0.386668	-0.190895	-1.34144	-2.06264	-3.4868
195.9	0.275799	2.9163	-0.39967	-2.66575	0.404873	0.45234	-1.47083	0.787548
196	2.09445	-6.23626	4.48062	-2.05588	-3.26947	0.414021	0.341671	-1.65361
196.1	-2.79809	-1.34829	1.42597	0.989472	3.42848	-1.45262	3.37242	-1.65069
196.2	0.245458	-1.34965	-2.23104	-1.46121	-1.47269	-3.31453	-4.57596	-1.0378
196.3	0.233963	0.476722	0.827654	-2.07996	-2.09648	0.925865	0.908112	-2.2551
196.4	-4.04595	-1.36034	2.66192	-0.870322	-2.10979	2.11041	-0.933439	-0.420911
196.5	-3.43965	-3.8046	0.225327	0.944637	0.31547	-4.02285	2.10886	0.190583
196.6	0.213876	0.462296	-0.986033	-0.294702	0.296527	1.44289	0.879125	0.191612
196.7	0.811111	-6.25539	-2.80395	0.905527	-0.94217	2.63124	-4.00446	0.193186
196.8	-0.422345	-3.20428	0.870081	0.882167	2.08961	-1.05906	-1.5592	0.195394
196.9	-2.26337	2.27942	-3.99915	-0.362166	-0.372467	6.23508	-0.945856	-2.85037
197	1.38673	4.70333	-0.321944	0.223861	-0.390711	-0.507679	-3.38034	5.69593
197.1	-1.67786	0.415236	0.299467	-0.411949	-3.45758	-0.528073	-0.320289	0.202041
197.2	3.19007	-0.205669	-0.909463	-2.87673	-4.07919	0.0630938	3.34536	0.81756
197.3	-1.70794	-3.26396	0.323016	0.760031	-1.04083	0.0451052	-2.14061	3.26218
197.4	-1.71855	-2.04749	-2.71526	-1.70845	0.162664	-2.41011	-0.296937	-1.0042
197.5	0.709605	1.60605	-0.869751	1.92514	-3.51366	-2.41978	1.5448	2.66568
197.6	0.693733	-2.064	-0.857542	-2.37522	-4.13326	-1.81802	3.38452	-0.377737
197.7	-0.541819	2.81041	2.20287	-1.17918	-1.09232	1.22316	-2.70456	-1.58463
197.8	-2.38488	-0.250717	-1.45051	-4.25348	0.724054	1.82098	-1.4632	0.26083
197.9	0.653535	-2.0853	-0.828949	-4.27248	1.31836	1.19971	0.996406	-0.335201
198	-1.80196	5.23089	2.83951	3.02613	-1.13619	-1.85785	-1.42581	1.51007
198.1	3.67389	-2.71019	2.84151	6.65261	0.683486	-1.24946	1.64541	-1.52519
198.2	2.43141	-0.878661	-2.645	-3.14138	-1.7674	-3.07989	-4.43483	-2.72413
198.3	0.581386	0.950074	0.414998	-3.76838	1.27564	1.192	-0.136515	-2.0904
198.4	-0.6555	-2.71175	1.02909	4.14383	0.0457718	-5.51896	-1.33368	-5.72504
198.5	0.54875	2.78064	0.421651	-0.762649	-1.79012	0.58896	-0.0887525	-0.205092
198.6	-1.29846	0.945868	-1.4049	1.65951	4.30558	-3.68015	1.15441	-0.182677
198.7	-0.703395	0.944555	-3.22868	1.64004	2.46366	1.20606	0.56653	1.66996
198.8	-5.59756	-0.275817	-5.0497	1.62291	-1.20269	3.03437	-3.67807	-0.138654
198.9	-0.726417	-0.274	0.449005	0.998506	1.84656	0.591297	-1.8163	-0.113557
199	-0.743345	-1.49157	-1.38088	-0.231826	1.84215	1.20215	1.87137	1.7415
199.1	-3.1998	-2.09708	-0.768775	-0.847207	-1.20993	-1.84643	1.28382	-4.33313
199.2	-1.99355	0.956786	-1.37791	-3.28769	-1.81603	-0.620528	1.30749	-0.639184
199.3	-2.6196	0.955453	-1.98627	-2.67169	-0.590864	-3.05536	3.16054	-0.610593
199.4	-0.196349	-0.265948	-1.37426	-2.05399	-1.19664	1.83168	-1.0874	3.07665
199.5	-0.217528	-1.4856	-1.37339	-0.215114	1.85788	-1.82733	-0.448895	0.0493646
199.6	2.80948	-1.48405	2.28591	0.403448	0.638637	1.83789	2.01743	-3.58177
199.7	-2.70653	-0.263731	-2.5984	-2.63497	-0.577716	-2.43091	-1.00921	-2.93772
[truncated: 38,002 more rows]

## Sheet: Figure 3S2B-D
Color Map Source Data					Cumulative Histograms					PD Rose Plot
X Position	Y Position	PD	DSI		Wild Type		vGAT			vGAT
-0.00538783	-0.00264073	11.4131	0.0582558		DSI (x scale)	Probability	DSI (x scale)	Probability		-1.36153
-0.00537861	-0.00264188	8.2264	0.0511399		0.005	0.00566572	0	0		-18.3394
-0.00537412	-0.00263979	-59.2218	0.0375435		0.015	0.00566572	0.01	0.015873		-3.7503
-0.00537412	-0.00262637	135.219	0.0703161		0.025	0.00566572	0.02	0.0396825		-96.1588
-0.00537609	-0.00261734	55.816	0.0421483		0.035	0.0141643	0.03	0.119048		45.3119
-0.00536955	-0.00263999	12.3314	0.13439		0.045	0.0169972	0.04	0.206349		50.0335
-0.00536963	-0.00262908	2.0302	0.0936882		0.055	0.0254958	0.05	0.34127		-25.9638
-0.00536979	-0.00261956	-33.0064	0.0957638		0.065	0.0424929	0.06	0.452381		-0.916435
-0.00536514	-0.00263084	41.1584	0.108779		0.075	0.0651558	0.07	0.611111		-61.219
-0.00536514	-0.00262637	-45.0165	0.0558148		0.085	0.0934844	0.08	0.746032		-13.7903
-0.00536514	-0.0026219	26.53	0.140198		0.095	0.104816	0.09	0.849206		24.6609
-0.0053623	-0.00263979	-8.18459	0.103419		0.105	0.150142	0.1	0.912698		-75.3629
-0.00536222	-0.00263532	-45.8378	0.0601686		0.115	0.186969	0.11	0.928571		-44.8351
-0.00536065	-0.00261964	-27.1578	0.0237781		0.125	0.223796	0.12	0.960317		3.52787
-0.00535698	-0.00263952	-39.0932	0.0688603		0.135	0.288952	0.13	0.984127		-10.4006
-0.00535778	-0.00263437	-53.992	0.132936		0.145	0.322946	0.14	0.992063		64.2613
-0.00535603	-0.00261579	-121.124	0.00689296		0.155	0.385269	0.15	1		0.213539
-0.00535031	-0.00264405	40.2795	0.0195591		0.165	0.436261	0.16	1		-0.537498
-0.00535316	-0.00263455	60.159	0.0702758		0.175	0.475921	0.17	1		-163.021
-0.00535472	-0.00262941	-82.4303	0.0542821		0.185	0.518414	0.18	1		12.1586
-0.00535209	-0.00262469	-89.4356	0.0194859		0.195	0.560907	0.19	1		-14.1572
-0.00535168	-0.00261742	24.9102	0.0568523		0.205	0.592068	0.2	1		-4.89859
-0.00534284	-0.00264435	-6.79555	0.0275992		0.215	0.640227	0.21	1		4.89645
-0.00534588	-0.00263979	-24.4862	0.069851		0.225	0.696884	0.22	1		-62.4899
-0.00534954	-0.0026361	35.6879	0.0749688		0.235	0.725212	0.23	1		6.76603
-0.00534746	-0.00261919	-20.0189	0.067328		0.245	0.76204	0.24	1		-17.444
-0.00533359	-0.00264414	-18.3039	0.0571038		0.255	0.793201	0.25	1		9.52564
-0.00534377	-0.002629	-121.386	0.0410697		0.265	0.827195	0.26	1		2.55964
-0.00534783	-0.00263119	-160.061	0.0485566		0.275	0.852691	0.27	1		-43.2969
-0.00533822	-0.00264426	164.527	0.0354171		0.285	0.878187	0.28	1		22.9511
-0.00533754	-0.00262935	168.543	0.0557644		0.295	0.889518	0.29	1		30.7751
-0.00534106	-0.0026255	96.6024	0.00535165		0.305	0.903683	0.3	1		-11.952
-0.00534034	-0.00262108	-32.6232	0.0542202		0.315	0.929178	0.31	1		22.4858
-0.0053392	-0.00261649	-3.97186	0.0431075		0.325	0.949009	0.32	1		74.6296
-0.00533386	-0.0026318	-40.6478	0.125821		0.335	0.966006	0.33	1		-27.1514
					0.345	0.968839	0.34	1		-73.9612
					0.355	0.98017	0.35	1		-57.0749
					0.365	0.991501	0.36	1		-2.98059
					0.375	0.994334	0.37	1		14.7518
					0.385	0.997167	0.38	1		4.70873
					0.395	0.997167	0.39	1		-36.8928
					0.405	0.997167	0.4	1		7.45775
					0.415	0.997167	0.41	1		-14.0646
					0.425	0.997167	0.42	1		15.9979
					0.435	1	0.43	1		-22.061
					0.445	1	0.44	1		35.494
					0.455	1	0.45	1		-49.1364
					0.465	1	0.46	1		-29.3941
					0.475	1	0.47	1		-65.9829
					0.485	1	0.48	1		-8.87844
					0.495	1	0.49	1		21.0753
					0.505	1	0.5	1		24.3132
					0.515	1	0.51	1		-58.3681
					0.525	1	0.52	1		-2.815
					0.535	1	0.53	1		-10.1752
					0.545	1	0.54	1		7.12419
					0.555	1	0.55	1		-21.7302
					0.565	1	0.56	1		-3.22121
					0.575	1	0.57	1		20.7078
					0.585	1	0.58	1		21.6171
					0.595	1	0.59	1		-24.9845
					0.605	1	0.6	1		-38.3463
					0.615	1				8.81857
					0.625	1				-39.7144
					0.635	1				-49.3361
					0.645	1				-170.262
					0.655	1				-2.64528
					0.665	1				27.0092
					0.675	1				20.4103
					0.685	1				9.57241
					0.695	1				52.5806
					0.705	1				6.83708
					0.715	1				-16.8149
					0.725	1				12.8079
					0.735	1				67.4051
					0.745	1				-26.7744
					0.755	1				-39.6012
					0.765	1				61.3761
					0.775	1				58.185
					0.785	1				-30.2054
					0.795	1				28.1472
					0.805	1				21.8822
					0.815	1				156.74
					0.825	1				32.4393
					0.835	1				-2.1455
					0.845	1				30.9037
					0.855	1				32.0449
					0.865	1				-23.8867
					0.875	1				-7.02812
					0.885	1				-69.9685
					0.895	1				13.1955
					0.905	1				68.0464
					0.915	1				154.835
					0.925	1				48.63
					0.935	1				35.3625
					0.945	1				-36.7376
					0.955	1				-65.0158
					0.965	1				107.645
					0.975	1				-171.059
					0.985	1				41.8622
					0.995	1				58.346
										0.268246
										8.41851
										68.5975
										95.1779
										70.6479
										24.2025
										46.5629
										24.3721
										147.784
										-18.6449
										23.9856
										51.1531
										-22.6467
										115.025
										42.1872
										-37.7726
										-12.0293
										84.9726
										-3.99701
										26.6547
										-2.86697
										-12.0962
										-13.4778
										-47.0962
