# Supplementary material for: The functional organization of excitation and inhibition in the dendrites of mouse direction-selective ganglion cells
Source: eLife. 2020 Feb 25;9:e52949. doi: 10.7554/eLife.52949 (PMC7069718; doi:10.7554/eLife.52949)
Supplement: Figure 3—source data 1. [file elife-52949-fig3-data1.xlsx]

## Sheet: Figure 3A-B
ROI Positions					Full Image							ROI 1							ROI 2							ROI 3							ROI 4
ROI	X	Y		Time	Trial 1	Trial 2	Trial 3	Trial 4	Trial 5	Trial 6		Trial 1	Trial 2	Trial 3	Trial 4	Trial 5	Trial 6		Trial 1	Trial 2	Trial 3	Trial 4	Trial 5	Trial 6		Trial 1	Trial 2	Trial 3	Trial 4	Trial 5	Trial 6		Trial 1	Trial 2	Trial 3	Trial 4	Trial 5	Trial 6
1	0.00369177	0.00182872		0.0006799	-0.0559495	0.0370116	0.00897162	-0.0214117	-0.0261157	0.0429998		0.0176318	0.103254	-0.121801	0.123603	0.0477819	0.0608548		-0.117962	-0.237025	-0.0108248	-0.186799	0.14452	0.130368		0.143128	-0.0530463	-0.235841	-0.200472	0.0842287	0.39415		0.0334594	0.0353208	0.297512	-0.15435	0.212387	0.161324
2	0.00368753	0.00182644		0.0615559	-0.0556337	0.0324131	0.0157691	-0.0273075	-0.0289688	0.0423732		0.0053809	0.125247	-0.0558978	0.0664803	0.0338448	0.0859574		-0.118352	-0.213679	-0.0123431	-0.188617	0.11733	0.121335		0.119686	-0.0722124	-0.18514	-0.205898	0.03605	0.383547		-0.0165163	0.0441948	0.329316	-0.201083	0.175241	0.181331
3	0.0036833	0.00182222		0.122432	-0.046154	0.0347909	0.0239293	-0.0235112	-0.0306535	0.0432934		0.0185131	0.0703541	-0.0184572	0.0846294	0.0707206	0.141452		-0.0955951	-0.169247	-0.00234325	-0.17269	0.0859608	0.069137		0.149449	-0.0600306	-0.143634	-0.175908	0.023399	0.334092		-0.0221887	0.00929743	0.341975	-0.201715	0.284291	0.205375
4	0.00366213	0.00182222		0.183308	-0.0425167	0.033499	0.0197323	-0.0125194	-0.0250335	0.0354308		0.0102652	0.0582868	-0.0157759	0.0872228	0.106177	0.195324		-0.126658	-0.119217	-0.0120766	-0.172991	0.054303	0.0498652		0.2381	-0.0969328	-0.0966896	-0.176016	-0.0402944	0.297599		-0.0863113	0.120035	0.25851	-0.278002	0.23725	0.180499
				0.244184	-0.0434052	0.0309297	0.0221801	-0.0110905	-0.0213597	0.0315765		0.000997084	0.0151056	0.0688063	0.0945565	0.11029	0.241101		-0.145001	-0.0766751	-0.0156441	-0.195007	0.00748759	0.028532		0.216195	-0.0510822	-0.0284467	-0.172223	-0.0475176	0.148245		-0.0659927	0.0775937	0.248454	-0.284248	0.207733	0.112298
				0.30506	-0.0320266	0.0207399	0.030555	-0.00635847	-0.0215199	0.0399946		-0.0460715	-0.0260446	0.0610876	0.0637295	0.116963	0.270482		-0.110464	-0.0610515	0.00295017	-0.174742	-0.0317153	0.0537682		0.24913	-0.0428287	0.0939757	-0.128837	-0.0936081	0.108302		-0.0629555	0.0675536	0.211293	-0.252389	0.185197	0.138829
				0.365936	-0.0225373	0.0135656	0.0323322	0.00310462	-0.0212175	0.0327862		-0.111956	-0.0196977	0.0630535	0.0548447	0.070249	0.236595		-0.0846728	-0.023955	0.0159355	-0.116358	-0.0405518	0.0273616		0.238936	-0.0465561	0.118133	-0.100952	-0.128759	0.0396308		0.00554092	0.0959636	0.157083	-0.296278	0.227781	0.153358
				0.426812	-0.0120111	0.0113576	0.0335333	0.00515597	-0.0213542	0.0319889		-0.116017	-0.070856	0.0529272	0.0648267	0.16347	0.258015		-0.0875777	0.0109551	0.0490167	-0.0882522	-0.0349887	-0.0179223		0.247204	-0.0808433	0.140008	-0.057134	-0.156516	0.00637729		-0.00567052	0.158119	0.103727	-0.232308	0.187973	0.109909
				0.487688	-0.00705468	0.0115978	0.0424947	-0.00340598	-0.0226854	0.0330391		-0.125618	-0.110027	0.077387	0.0746146	0.209126	0.21589		-0.0900417	0.00863522	0.0784997	-0.0880087	-0.145062	-0.0604373		0.249198	-0.0998364	0.185445	-0.0643878	-0.17822	-0.0025339		-0.00469047	0.197903	0.00648349	-0.26543	0.12565	0.137512
				0.548564	-0.00170843	0.0126902	0.0463981	-0.00446295	-0.0190256	0.0294573		-0.131723	-0.148002	0.0334321	0.101926	0.242622	0.211141		-0.108139	0.0293087	0.0631619	-0.0333236	-0.107383	-0.149151		0.271447	-0.0753246	0.182841	-0.0332661	-0.140814	0.0309191		-0.0354937	0.214228	-0.0321997	-0.286544	0.140874	0.134876
				0.60944	-0.0151638	-2.03874e-05	0.0366783	-0.00164171	-0.0080645	0.0311466		-0.177604	-0.135618	0.0221555	0.0865547	0.199469	0.232747		-0.121347	0.0518279	0.0621721	-0.0414476	-0.126488	-0.155321		0.222841	-0.0677397	0.211193	0.0258577	-0.144797	-0.00996636		0.0222719	0.234	-0.108344	-0.202362	0.163971	0.138268
				0.670316	-0.0167313	-0.0037487	0.0284533	-0.00162138	0.000637981	0.030621		-0.173923	-0.131402	0.00622351	0.0547828	0.174944	0.228625		-0.13969	0.104569	0.0327774	-0.00554613	-0.106083	-0.183553		0.221221	-0.0440268	0.196088	-0.0155456	-0.0684135	-0.0194564		-0.0402302	0.228383	-0.0793034	-0.12474	0.127444	0.127114
				0.731192	-0.0211287	0.00381708	0.0246624	-0.00512349	0.0100765	0.0413979		-0.148677	-0.130468	0.0222502	0.0826202	0.174032	0.193974		-0.155691	0.131137	0.0409175	-0.01826	-0.0895798	-0.147845		0.232711	-0.0145298	0.133732	-0.0161495	-0.0431222	0.018738		-0.0388567	0.189277	-0.060533	-0.109146	0.162082	0.109496
				0.792068	-0.0268358	0.00177319	0.0200937	-0.00493491	0.00974659	0.0384079		-0.0982168	-0.153547	0.0337021	0.0765608	0.160122	0.178175		-0.176257	0.144899	0.0029384	0.0107807	-0.102104	-0.15684		0.20133	-0.00392683	0.113943	0.0334833	0.00446354	0.0394169		-0.0230857	0.165141	0.00838471	-0.00967723	0.0636282	0.07711
				0.852944	-0.0260172	-0.00414225	0.0145329	-0.0024734	0.00534971	0.0268728		-0.107971	-0.138354	0.0114188	0.0799061	0.0594124	0.13916		-0.178534	0.124015	-0.0410777	0.0283966	-0.0490941	-0.142873		0.168122	0.0152834	0.0374749	0.0811759	0.00735976	0.078116		0.00464753	0.154227	0.049848	0.0187761	0.0620282	0.121168
				0.91382	-0.0214028	-0.0125106	0.0138394	0.00195046	0.00825538	0.0309504		-0.108951	-0.153996	-0.0801469	0.0649518	0.074613	0.101691		-0.121187	0.137235	-0.021502	0.0684712	0.00419239	-0.0786891		0.129557	-0.00130417	0.0396834	0.110584	-0.00302386	0.122239		0.0328718	0.0910234	0.0515898	0.11463	0.0823837	0.163271
				0.974696	-0.010691	-0.00782282	0.00420012	-0.00387398	0.00995588	0.0346956		-0.104898	-0.115968	-0.046114	0.0426834	0.0189619	0.0551483		-0.0838412	0.104937	-0.030397	0.107828	0.0140111	0.00212563		0.0367718	0.0424369	-0.0292873	0.145585	0.0603608	0.128181		0.0371035	0.0144397	0.100305	0.184491	0.0998515	0.230072
				1.03557	-0.00760068	-0.0127395	-0.00518175	-0.00893884	0.0119539	0.034862		-0.0665547	-0.0698454	-0.0671163	0.0053505	-0.0340404	0.032294		-0.0874114	0.0822396	-0.0339243	0.0741261	0.00620319	0.0434838		0.0243495	0.0303701	-0.0616202	0.0976974	0.0484732	0.183629		0.0702152	-0.00407774	0.0854439	0.169949	0.0465065	0.217327
				1.09645	-0.0042251	-0.00549401	0.000786139	-0.0145134	0.0154596	0.0326153		-0.0687514	-0.0758636	-0.0903246	0.0179611	-0.0869186	0.0795066		-0.101758	0.0479273	-0.0352108	0.122554	0.0350854	0.0555683		-0.0503128	0.021157	-0.0557146	0.0768424	0.0758231	0.136083		0.122026	-0.0603219	0.109457	0.165264	0.120166	0.184492
				1.15732	-0.00463639	-0.0085165	-0.00290403	-0.0129425	0.0157924	0.0253209		-0.088572	-0.051647	-0.0634561	-0.0280102	-0.084529	0.117675		-0.135513	0.0439947	-0.0673613	0.151641	0.0107612	0.0641933		-0.0807844	0.00426803	-0.0485242	0.0615016	-0.00403992	0.0885084		0.0986743	-0.0779959	0.0813371	0.135062	0.17403	0.179245
				1.2182	0.00410769	-0.0121207	-0.00991811	-0.00473762	0.0122384	0.00908114		-0.0423338	-0.083164	-0.112698	0.010079	-0.0601374	0.13442		-0.109492	0.0904706	-0.0886661	0.126331	-0.0583458	0.0583247		-0.0296815	0.0222858	-0.0400867	0.0619635	-0.0254586	0.062377		0.137613	-0.102127	0.0924712	0.0488548	0.220106	0.14879
				1.27908	-0.00785996	-0.00776811	-0.015803	-0.00282229	0.00968331	0.0145348		-0.00972263	-0.0904533	-0.115588	0.000995312	-0.0584677	0.160032		-0.113082	0.13028	-0.102979	0.123655	-0.0540227	0.102327		-0.067721	0.00375066	-0.0780933	0.0280026	-0.0556813	0.0406497		0.10165	-0.133811	0.125547	-0.00641601	0.209042	0.125763
				1.33995	-0.0099725	-0.0180689	-0.00415769	-0.00537941	-0.00183484	0.00655729		0.0222495	-0.0747477	-0.086682	-0.0177537	-0.0851085	0.0970772		-0.075178	0.120147	-0.087697	0.0912819	-0.0958963	0.0433355		-0.133924	0.0212954	-0.0424703	0.02684	-0.0605858	-0.0218679		0.111814	-0.190854	0.199323	-0.0198083	0.238023	0.0977603
				1.40083	-0.00201096	-0.0116652	-0.00100949	-0.00146397	-0.0105347	0.0121635		0.0194172	-0.0151448	-0.078902	-0.045547	-0.120151	0.0573566		-0.0438892	0.121715	-0.0744092	0.054737	-0.127383	0.029734		-0.120164	-0.0333435	-0.0454084	0.032837	-0.0705455	-0.0351575		0.135957	-0.130712	0.184839	-0.0395066	0.262415	0.117808
				1.4617	-0.00132334	-0.00467671	0.000264216	-0.000871566	-0.0210871	0.00514927		0.00973819	0.00265202	-0.0502325	-0.0215158	-0.121007	0.000211375		-0.0181731	0.143472	-0.0539449	0.0612826	-0.168814	-0.0333655		-0.106636	-0.066429	-0.0542328	-0.00632714	-0.0638553	-0.0512841		0.191327	-0.0786739	0.165549	-0.138881	0.240425	0.0924995
				1.52258	-0.000184882	0.000807753	0.00201715	-0.00984527	-0.0160266	1.78089e-05		0.0370247	-0.00875455	-0.0675233	-0.0112847	-0.0175652	-0.0450952		-0.0219639	0.107435	-0.022933	0.0449388	-0.209585	-0.11322		-0.0990066	-0.144936	-0.0391028	-0.0338278	-0.0338409	-0.098662		0.105844	0.0116711	0.0493771	-0.10897	0.152449	0.0885297
				1.58346	0.00398856	-0.00397451	0.0141997	-0.0139472	-0.00904922	-1.78089e-05		0.0255254	-0.000923245	-0.0474242	0.0143233	-0.0104769	-0.114364		0.0132995	0.0800639	-0.010899	0.00271645	-0.249042	-0.161776		-0.0819691	-0.15989	-0.0235083	-0.0638153	0.000550055	-0.091654		0.0612434	0.0548574	-0.00726532	-0.174104	0.0857072	0.0507897
				1.64433	0.00570094	0.0019368	0.0142533	-0.00969789	-0.00569204	-0.012649		0.00412376	-0.000289145	-0.0615745	0.0431738	-0.00130187	-0.0950108		0.0238975	0.0530205	-0.00775512	0.0175981	-0.17354	-0.203681		-0.0892188	-0.119629	-0.030145	-0.0736253	-0.0197004	-0.123398		0.0470314	0.154014	0.00726532	-0.133176	0.0763596	0.041677
				1.70521	0.0037404	-0.00152363	0.0123887	-0.00677577	0.00102622	-0.0166402		-0.0210013	0.0590604	0.00466717	0.00375779	-0.0341103	-0.0845974		-0.0023165	0.0434268	-0.00732311	-0.0509738	-0.156516	-0.186437		-0.105233	-0.141212	0.00464757	-0.0969304	0.00630275	-0.0851933		0.034872	0.224487	0.0348579	-0.0481715	0.0289041	-0.0348198
				1.76608	0.0114834	0.00517246	0.0141198	-0.00325226	-0.00227962	-0.0194509		-0.0106219	0.0826882	0.0361607	-0.000995517	-0.0371616	-0.0451928		-0.0167748	0.0295575	0.00105309	-0.0766878	-0.131429	-0.200849		-0.00787977	-0.103025	0.0233144	-0.135961	0.017897	-0.055466		-0.0158847	0.25769	0.0506026	-0.0702584	-0.0446549	-0.0895454
				1.82696	0.0103373	0.00748939	0.0105514	0.00611866	-0.00128115	-0.0232409		0.0023092	0.0602957	0.067071	-0.00112467	-0.0503401	-0.0672503		-0.0480278	0.0093463	0.0250297	-0.103095	-0.0762596	-0.189014		0.0836645	-0.0560119	0.00543735	-0.106136	0.0258615	-0.0192245		0.0480919	0.209386	0.0107725	-0.0153368	-0.0334743	-0.173579
				1.88784	0.0184499	0.00582485	0.00907678	0.00556376	-0.00331413	-0.0272267		0.011967	0.0318527	0.0603936	-0.00680626	-0.0774324	-0.1301		-0.0310989	-0.0123089	-0.00105291	-0.0869781	-0.0846754	-0.186411		0.128218	-0.0398584	0.0391672	-0.0918375	0.0210442	-0.0349641		0.0387432	0.164661	0.00906841	0.00441043	-0.130855	-0.16588
				1.94871	0.0211173	0.00739391	0.0102713	0.00979588	-0.000119816	-0.0201833		-0.00470539	0.0980285	0.0502788	-0.0185651	-0.0644607	-0.0572968		-0.0240595	-0.0121532	0.0243926	-0.0980114	0.0186286	-0.100337		0.181245	0.0148183	0.023379	-0.0608055	-0.0020603	0.00480198		0.00376976	0.130206	0.0105351	-0.0412931	-0.104331	-0.11391
				2.00959	0.0296842	0.0116014	0.0143387	0.00928482	0.00165771	-0.0133625		-0.00490021	0.0728356	0.0417017	-0.0794591	-0.0212813	-0.0409231		0.01113	0.018557	0.0748962	-0.0838049	0.0260091	-0.0283786		0.210309	0.0564762	0.0320992	-0.0285243	-0.00661848	-0.0054142		-0.0284962	0.125537	-0.0121637	0.00378202	-0.104285	-0.0742537
				2.07046	0.0254321	0.00881147	0.0132004	0.00926475	0.00333695	-0.0129841		-0.0578989	0.08128	0.114839	-0.0689835	0.0174935	-0.0281771		0.0394748	-0.0093463	0.0810283	-0.0843232	0.0462396	-0.00939657		0.223547	0.0943693	0.0117562	0.0249577	-0.00893069	0.0814645		-0.133436	0.0483084	0.0141676	0.0322253	-0.12811	-0.049929
				2.13134	0.0227239	0.00406793	0.00825888	0.0105584	0.00326693	-0.0128739		-0.0148382	0.0475502	0.11207	-0.100696	0.00130204	0.0355419		0.0558472	-0.0438527	0.033786	-0.0407595	0.0779653	-0.00856423		0.265824	0.0488745	0.0377553	0.00898823	-0.0288138	0.0434534		-0.0803012	0.0111187	-0.0144173	0.0464179	-0.177318	-0.0823091
				2.19222	0.0147518	0.00353914	0.0103354	0.0168999	0.0120988	-0.0234042		-0.0447818	0.0403546	0.0952887	-0.0630653	0.0234359	0.0486913		0.00233775	-0.0561094	0.0111103	0.00157202	0.0821745	-0.0166422		0.281632	0.0767101	0.0559647	0.0313505	0.0153235	0.0147055		-0.128866	-0.0214422	-0.0576823	0.0538183	-0.102735	-0.11328
				2.25309	0.0139944	-0.000600008	0.00115526	0.0198648	0.00989883	-0.0270625		-0.0178317	0.00932001	0.0686917	-0.0447653	0.0762887	0.0158968		-0.0229553	-0.0665211	0.0333042	-0.00201494	0.0432934	0.00505713		0.272638	0.0624729	0.0422412	0.0149647	-0.0127069	-0.0015885		-0.112414	-0.00583342	-0.0891508	0.0276465	-0.0147521	-0.0786199
				2.31397	0.0102506	0.000600008	0.000248337	0.0155155	0.00534504	-0.0196579		0.0600395	0.000289145	0.0660054	-0.0247904	0.0936482	0.0325115		-0.000851576	-0.0480124	0.088299	-0.000701939	0.0414836	0.0479022		0.26436	0.0509499	0.0572661	0.0230731	-0.0261002	-0.0190754		-0.073655	-0.0235876	-0.0611886	0.00949849	0.00364934	-0.104612
				2.37484	0.000185129	-0.00356185	-0.00355897	0.0116705	0.00819599	-0.00748502		0.0984714	0.00485325	0.0924257	-0.0331748	0.106698	0.024458		0.027923	-0.0870282	0.12435	0.00902667	0.0450369	-0.00796592		0.202279	0.00945409	0.0168306	-0.0509308	0.00621798	0.0259594		-0.114349	-0.0969645	-0.0953551	0.068382	0.0406259	-0.0740463
				2.43572	0.000445892	-0.00832708	-0.000248597	0.0173893	0.00844081	-0.00645628		0.0940247	0.0462687	0.106143	-0.0198538	0.100674	0.0228727		0.0579814	-0.0855096	0.105056	0.0300546	0.00453236	-0.0391186		0.158701	-0.0289351	0.0529573	0.017845	0.00183849	0.0015885		-0.111465	-0.104557	-0.0950101	0.0514799	0.0763519	7.47094e-05
				2.4966	-0.00388376	0.00486587	-0.00481081	0.0114751	-0.00415129	0.00853602		0.073102	0.0270887	0.125571	0.00806336	0.0896859	0.0326127		0.0711527	-0.057753	0.116231	0.000701727	-0.0126737	0.00824723		0.13528	-0.0481221	0.0457864	0.00632692	-0.0467311	-0.0180862		-0.0980682	-0.0501601	-0.125782	0.101875	0.0420901	0.00346967
				2.55747	-0.00376091	-0.00305785	-0.00572528	0.00750154	-0.00481572	0.00637864		0.0270017	0.00423599	0.0740132	0.0340801	0.125735	-0.00497989		0.108766	-0.109764	0.100668	-0.00492337	0.0132149	-0.00212563		0.126076	-0.0480163	0.053427	0.0311903	-0.000550296	-0.0291451		-0.0739983	-0.0194436	-0.120702	0.0692633	-0.00364934	0.0137289
				2.61835	-0.00863606	-0.00370121	-0.0043373	0.00713892	0.00396845	0.00881623		0.0390956	0.00324635	0.0595316	0.0700946	0.170004	-0.0765045		0.132782	-0.128569	0.0622058	0.0101988	0.021374	0.0350734		0.0547921	-0.108046	0.0452459	0.0208438	0.033785	-0.0340782		-0.133156	-0.0361108	-0.119959	0.0729721	-0.0622489	0.0369994
				2.67922	-0.00460895	-0.00327359	-0.00560684	0.0100634	0.000119816	0.0052244		0.0142944	-0.00069969	0.0124522	0.0904469	0.165128	-0.0711386		0.122899	-0.101816	0.065756	-0.00716923	0.00951721	0.0666955		-0.00268364	-0.117734	-0.00464757	-0.0117867	0.0140187	-0.00362163		-0.154303	-0.0176808	-0.109188	-0.0130443	-0.109031	0.0206155
				2.7401	-0.00247564	0.00859676	-0.0129533	0.00443733	-0.0141904	-0.00153212		0.0377078	-0.0145439	-0.00466717	0.0792701	0.136186	-0.0752293		0.0734881	-0.07522	0.0445342	-0.0304435	-0.00608346	0.0319403		-0.040567	-0.0745455	-0.0441379	-0.0640268	0.0392591	0.0462932		-0.0684495	0.0489385	-0.104313	-0.00378202	-0.130653	-7.47094e-05
				2.80098	-0.00372483	0.0128146	-0.0127659	0.000871566	-0.00604345	-0.000268525		0.0337333	-0.0290982	-0.0226157	0.0474695	0.121693	-0.0481645		0.0522323	-0.0634978	0.0180534	-0.0283091	0.00326477	0.0305423		-0.0569789	-0.06985	0.0160514	-0.0646742	0.0728033	0.173701		-0.0524998	0.0680295	-0.0662898	-0.0298015	-0.114198	-0.0795149
				2.86185	-0.00098373	0.0209156	-0.0191123	-0.00108444	-0.0102915	0.00886465		-0.00230938	-0.0521897	-0.0716399	0.0832118	0.092039	-0.000546118		0.0296888	-0.0492448	-0.0161409	-0.0414036	-0.00326457	-0.013228		0.000361975	-0.00375046	-0.014193	-0.0880254	0.0637199	0.193821		-0.00377002	0.0561064	-0.0586403	-0.101342	-0.128521	-0.0682285
				2.92273	-0.00379725	0.0240775	-0.0197868	-0.0104849	-0.011791	0.0142254		-0.0253383	-0.100593	-0.0711503	0.110945	0.0444696	-0.000211375		0.000851576	-0.0495643	-0.0425061	-0.0139568	-0.0291263	0.0111073		-0.000362212	0.0253752	-0.0270147	-0.129193	0.0229646	0.153718		0.0223305	0.00407807	-0.0817296	-0.0619044	-0.114022	-0.0988834
				2.9836	0.00342971	0.0228504	-0.0141586	-0.024351	-0.00533052	0.0272968		-0.0420911	-0.109202	-0.0947261	0.123565	0.0598134	0.0136814		0.0110442	0.0190419	-0.104769	-0.00722904	-0.0140576	0.0169942		-0.0141146	0.017886	-0.0658734	-0.156748	-0.0074662	0.133796		-0.0341118	0.0213671	-0.0424018	-0.156555	-0.146429	-0.105382
				3.04448	-0.000605563	0.0200441	-0.0104106	-0.0287939	-0.00715291	0.029925		-0.0415158	-0.0783142	-0.0812573	0.0938396	0.015787	0.0863533		0.000169044	0.0143632	-0.0976996	0.0367861	0.011517	0.0960781		0.0106459	0.0191164	-0.0790257	-0.154717	-0.0384015	0.124778		-0.131495	0.0768314	-0.0091508	-0.155327	-0.229729	-0.0432487
				3.10536	0.00072717	0.0121682	-0.00749904	-0.0287353	-0.00839801	0.0321659		-0.030369	-0.124296	-0.0321088	0.0616452	-0.0508056	0.09943		0.0311711	0.0324143	-0.137714	0.0655673	-0.0270104	0.139008		0.0544541	-0.0189873	-0.0938599	-0.114352	-0.0496728	0.104909		-0.158284	0.131399	-0.0343707	-0.103272	-0.27559	-0.00866752
				3.16623	-0.00902165	-0.00996736	-0.0104736	-0.0228662	-0.00448325	0.0259459		-0.0156841	-0.126252	-0.0286742	0.105319	-0.00156969	0.0892493		0.042577	0.015475	-0.124768	0.108098	-0.00128681	0.138935		0.0409141	-0.0635805	-0.110818	-0.0778395	-0.0502573	0.129468		-0.218436	0.134359	-0.00705191	-0.0755323	-0.250631	-0.0383963
				3.22711	-0.0123377	-0.00469348	-0.0118983	-0.033279	-0.000814075	0.0174168		0.0247219	-0.102164	-0.0213525	0.0829474	-0.0436529	0.124539		0.0508247	0.0282557	-0.136817	0.158019	-0.0477743	0.121233		0.078228	-0.0861091	-0.105789	-0.118105	-0.0313238	0.0813275		-0.246855	0.219042	-0.0188039	-0.0794006	-0.250062	-0.0123897
				3.28798	-0.024029	-0.00946568	-0.0122828	-0.0374377	0.00552554	0.00830868		0.0225942	-0.098874	-0.0175768	0.0796059	0.0304094	0.081506		0.0130783	0.0263323	-0.118695	0.131154	-0.0855664	0.130711		0.106872	-0.0638833	-0.0593854	-0.124253	-0.0116771	0.145031		-0.323834	0.157377	-0.00954558	-0.0780756	-0.129242	-0.0108282
				3.34886	-0.0256059	-0.0293578	-0.0138577	-0.0400321	-0.00286988	0.00543644		0.0408523	-0.105873	-0.0317659	0.0587788	0.0476166	0.0925857		0.0449743	-0.039676	-0.078873	0.160248	-0.144781	0.135901		0.0878143	-0.125741	-0.00960151	-0.172404	-0.099716	0.111074		-0.280446	0.159803	0.0301618	-0.113069	-0.123924	-0.0198215
				3.40974	-0.032691	-0.0318169	-0.0188155	-0.0421714	0.00168235	-0.00302556		0.0266674	-0.0658612	0.0151492	0.0045524	0.0517317	0.105758		0.0256715	-0.0676859	-0.0531483	0.183052	-0.127133	0.0973014		0.128066	-0.0949231	0.0441008	-0.168533	-0.158214	0.0598212		-0.260287	0.149121	-0.00836869	-0.0881909	-0.0297326	-0.029421
				3.47061	-0.0344548	-0.0184854	-0.02089	-0.0451271	0.00123888	-0.0139104		0.0258117	-0.0282994	0.0158851	0.0216021	0.0611495	0.10779		0.0472857	-0.094326	-0.00923784	0.166387	-0.134605	0.0372487		0.128486	-0.0908082	0.0214441	-0.220307	-0.124857	0.0948602		-0.251769	0.120673	-0.0254794	-0.0550603	0.061991	-0.0385325
				3.53149	-0.0263061	0.00572653	-0.00294282	-0.0268464	0.00814334	-0.00649495		0.0198186	0.00150314	0.0407628	0.0326706	0.0824613	0.140537		0.0668171	-0.0509029	-0.0138331	0.150017	-0.176306	0.0827765		0.169055	-0.0608836	0.117094	-0.14686	-0.156764	0.0648761		-0.229074	0.143236	0.00362651	-0.0444799	0.114855	0.00364471
				3.59236	-0.00290621	0.0383961	0.0196475	0.000913032	0.0191991	0.0129788		-0.00710228	0.0390564	0.0576604	0.120822	0.139041	0.182857		0.102262	-0.0802194	0.056246	0.0938939	-0.12506	0.125705		0.208712	0.00151712	0.162391	-0.0783922	-0.181562	0.0722658		-0.159234	0.145028	0.00280062	0.0766237	0.124667	-0.00525528
				3.65324	0.0350789	0.0820571	0.0614657	0.0567495	0.0478144	0.043285		0.00575374	0.0806624	0.0754125	0.226302	0.188544	0.226971		0.110153	-0.0264358	0.0900105	0.0956949	-0.105567	0.182954		0.253076	0.0402959	0.228669	0.0210894	-0.118129	0.179767		-0.0267342	0.115189	0.00215926	0.0851286	0.167513	-0.00825168
				3.71412	0.0786127	0.151526	0.105351	0.122426	0.0947187	0.0899919		0.0640034	0.125307	0.110759	0.315616	0.21129	0.248204		0.108869	0.0305421	0.146218	0.117974	-0.114198	0.232563		0.307875	0.116122	0.288018	0.0847615	-0.0529948	0.242502		0.0732584	0.107827	0.050116	0.0990627	0.268826	0.114075
				3.77499	0.138277	0.223347	0.151619	0.195083	0.159522	0.147284		0.128055	0.184182	0.162344	0.378291	0.250572	0.364109		0.0891289	0.145527	0.212438	0.162319	-0.0902597	0.291721		0.331258	0.208842	0.297228	0.171501	-0.0217103	0.335555		0.167573	0.108756	0.113942	0.116503	0.358974	0.174297
				3.83587	0.208526	0.281404	0.20943	0.262663	0.225597	0.206381		0.1797	0.223827	0.237021	0.501543	0.278247	0.359386		0.087485	0.18777	0.247874	0.224154	-0.0460568	0.356411		0.403404	0.302304	0.349186	0.301559	0.0956788	0.449952		0.359893	0.0951582	0.223299	0.209691	0.48719	0.226653
				3.89674	0.279956	0.339326	0.269491	0.342907	0.29821	0.273186		0.215149	0.28115	0.289845	0.633643	0.304846	0.500255		0.150929	0.197075	0.22847	0.275248	0.056307	0.421996		0.477801	0.366228	0.451647	0.469124	0.174617	0.495278		0.406358	0.112377	0.280957	0.292932	0.652121	0.264029
				3.95762	0.360955	0.395964	0.322548	0.405608	0.348065	0.337951		0.227526	0.319426	0.348685	0.79792	0.263775	0.571387		0.206833	0.22875	0.219326	0.361001	0.0887829	0.482625		0.6248	0.414062	0.470423	0.593977	0.219566	0.453308		0.527259	0.114642	0.314066	0.31072	0.676518	0.295444
				4.0185	0.432068	0.447348	0.37864	0.457123	0.398495	0.400676		0.302437	0.316384	0.421615	0.936721	0.264251	0.613746		0.219531	0.225521	0.191671	0.46736	0.0857408	0.573865		0.707175	0.468931	0.512597	0.689561	0.216648	0.492172		0.541963	0.223142	0.316697	0.334427	0.741482	0.281199
				4.07937	0.494743	0.488398	0.438074	0.514112	0.458667	0.455869		0.376322	0.361431	0.438862	1.01388	0.254846	0.682396		0.211842	0.300453	0.229538	0.526042	0.177211	0.615459		0.813795	0.525591	0.542407	0.788723	0.293159	0.552335		0.49155	0.313117	0.369831	0.321012	0.731434	0.303323
				4.14025	0.540116	0.521375	0.481451	0.556412	0.502865	0.491314		0.41352	0.408236	0.451941	1.06589	0.192824	0.73038		0.225946	0.309519	0.275927	0.620103	0.205364	0.685731		0.91724	0.557808	0.548554	0.88136	0.337612	0.59075		0.525762	0.372322	0.328596	0.370563	0.692566	0.33613
				4.20112	0.58494	0.531141	0.513566	0.589275	0.545008	0.52713		0.454097	0.383332	0.482755	1.05547	0.177054	0.83275		0.267337	0.330326	0.280842	0.749275	0.270139	0.737499		0.998643	0.547208	0.590306	0.916214	0.353045	0.682319		0.547389	0.391222	0.290158	0.404802	0.737269	0.370871
				4.262	0.624019	0.532237	0.539113	0.614398	0.565335	0.549626		0.504139	0.391802	0.474523	1.07235	0.224281	0.840218		0.290609	0.349178	0.331807	0.857659	0.282045	0.721435		1.00638	0.553775	0.592951	0.94185	0.330576	0.734603		0.516412	0.452651	0.274998	0.353939	0.697268	0.350039
				4.32288	0.642001	0.534741	0.546766	0.612548	0.57654	0.562576		0.492958	0.387428	0.472165	1.07962	0.193714	0.907418		0.305687	0.369739	0.300958	0.86458	0.250176	0.698808		1.04386	0.562443	0.587865	0.93161	0.354445	0.777406		0.488884	0.396703	0.203004	0.340654	0.645939	0.416879
				4.38375	0.651235	0.503342	0.552217	0.602097	0.567181	0.570061		0.471976	0.376322	0.472741	1.0053	0.221705	0.866039		0.298751	0.340668	0.270544	0.867118	0.245103	0.706258		0.995694	0.571965	0.647578	0.880276	0.363011	0.868561		0.435144	0.295133	0.226172	0.362029	0.583883	0.392995
				4.44463	0.647216	0.466862	0.546089	0.580602	0.54774	0.559877		0.471404	0.371723	0.422519	0.950694	0.22415	0.965071		0.326911	0.301823	0.294951	0.845127	0.188112	0.693251		0.982384	0.560364	0.68799	0.798876	0.36931	0.823714		0.37529	0.326557	0.223219	0.393825	0.513695	0.375072
				4.5055	0.625802	0.454039	0.522056	0.537554	0.529508	0.520953		0.440935	0.376258	0.384318	0.834342	0.25492	0.954974		0.258898	0.304963	0.333433	0.800811	0.209208	0.618341		0.957331	0.572422	0.648391	0.739801	0.35892	0.791844		0.363131	0.337132	0.20628	0.363596	0.550194	0.316206
				4.56638	0.596346	0.430674	0.503704	0.507604	0.499901	0.4997		0.438381	0.366818	0.386548	0.78593	0.331317	0.98614		0.229834	0.296925	0.344427	0.725617	0.213266	0.658667		0.902275	0.505687	0.593789	0.685321	0.38181	0.773414		0.347998	0.301839	0.186103	0.457685	0.516758	0.246842
				4.62726	0.574714	0.41036	0.483696	0.49117	0.473072	0.480019		0.388703	0.342893	0.377146	0.755173	0.352167	0.984531		0.261009	0.252647	0.311112	0.719641	0.174651	0.592272		0.85913	0.515354	0.671998	0.700936	0.413046	0.799947		0.266514	0.323187	0.144088	0.505473	0.471688	0.291039
				4.68813	0.544344	0.387292	0.470492	0.479566	0.455027	0.470095		0.370377	0.391658	0.396269	0.77985	0.43086	0.944558		0.272797	0.24823	0.389333	0.681694	0.233863	0.592819		0.763078	0.502503	0.634404	0.744366	0.425641	0.852527		0.277919	0.293985	0.116632	0.524157	0.461566	0.294453
				4.74901	0.519167	0.378574	0.456811	0.473947	0.438451	0.454806		0.345402	0.356466	0.401373	0.79245	0.449086	0.956343		0.272095	0.3146	0.361837	0.659795	0.210258	0.591709		0.747251	0.463371	0.629359	0.718118	0.518407	0.837009		0.334748	0.273206	0.120272	0.503119	0.428007	0.281724
				4.80988	0.487494	0.360752	0.440215	0.46176	0.428276	0.435759		0.309794	0.385767	0.375414	0.783817	0.44913	0.926762		0.275836	0.27318	0.366658	0.658094	0.281103	0.565062		0.677926	0.420701	0.623548	0.667612	0.593795	0.743631		0.270007	0.271916	0.171724	0.5	0.474237	0.303146
				4.87076	0.461013	0.340267	0.433514	0.451484	0.410112	0.41848		0.339911	0.373442	0.396961	0.791337	0.434689	0.902288		0.273752	0.309967	0.33232	0.629711	0.353796	0.576095		0.55535	0.381897	0.567529	0.64995	0.547847	0.724345		0.255337	0.200423	0.24669	0.495216	0.481689	0.267613
				4.93164	0.436225	0.311891	0.416187	0.437564	0.382013	0.395339		0.314435	0.355063	0.378255	0.838205	0.445512	0.829637		0.264468	0.271003	0.284564	0.591328	0.373191	0.551415		0.506502	0.288574	0.559185	0.637324	0.577162	0.65886		0.284024	0.186676	0.279718	0.507914	0.472664	0.270926
				4.99251	0.41764	0.310353	0.395171	0.418736	0.361091	0.388874		0.270239	0.329722	0.354385	0.853721	0.427931	0.83764		0.292084	0.199948	0.245134	0.597243	0.444771	0.550465		0.520347	0.268249	0.483989	0.603559	0.568302	0.627431		0.233235	0.248807	0.224194	0.449985	0.482427	0.273727
				5.05339	0.406417	0.304473	0.378049	0.3935	0.348628	0.370808		0.225913	0.258143	0.300218	0.808514	0.375737	0.762733		0.279568	0.184795	0.292667	0.628639	0.444729	0.505806		0.518552	0.239227	0.463973	0.535779	0.486851	0.567936		0.293255	0.283022	0.257029	0.363363	0.454626	0.206027
				5.11426	0.386789	0.291372	0.363464	0.368603	0.338406	0.363939		0.239269	0.229935	0.283522	0.788212	0.348104	0.679395		0.236865	0.149352	0.270716	0.59123	0.432749	0.466103		0.548942	0.251699	0.440212	0.521171	0.461627	0.508785		0.255006	0.326054	0.278214	0.370375	0.474964	0.189359
				5.17514	0.370754	0.286266	0.353326	0.354303	0.346972	0.346573		0.192727	0.225618	0.2401	0.759297	0.284159	0.682213		0.228754	0.15611	0.269077	0.53303	0.500248	0.387949		0.565802	0.236798	0.425042	0.458159	0.447202	0.462266		0.216639	0.33681	0.250338	0.346378	0.460796	0.223946
				5.23602	0.355704	0.274861	0.340161	0.336281	0.335797	0.329362		0.155353	0.164579	0.217059	0.769388	0.219786	0.661981		0.246609	0.186301	0.258618	0.536606	0.502036	0.323839		0.593773	0.19838	0.402522	0.419942	0.373871	0.385941		0.227801	0.336819	0.213137	0.327432	0.481507	0.232462
				5.29689	0.356937	0.261939	0.31842	0.318508	0.330268	0.322397		0.18798	0.122421	0.209989	0.722391	0.179966	0.610075		0.241669	0.223148	0.26206	0.456804	0.492576	0.252904		0.573747	0.149161	0.375438	0.34748	0.277852	0.343024		0.194174	0.336768	0.18656	0.303908	0.402995	0.276043
				5.35777	0.358703	0.257552	0.308875	0.3062	0.318787	0.313462		0.181352	0.119002	0.192923	0.730486	0.108801	0.57942		0.197438	0.259341	0.260942	0.425019	0.419843	0.222865		0.597637	0.164967	0.321293	0.28583	0.216854	0.268671		0.25366	0.311461	0.18407	0.266692	0.394292	0.250658
				5.41864	0.344784	0.250754	0.292274	0.284323	0.315339	0.30144		0.17282	0.0892034	0.198905	0.725939	0.0821242	0.554084		0.183268	0.294119	0.249005	0.308905	0.381344	0.227951		0.579204	0.205747	0.284279	0.222961	0.209932	0.302144		0.269722	0.230348	0.14688	0.222095	0.386589	0.231268
				5.47952	0.338205	0.24361	0.290002	0.271132	0.308418	0.299846		0.219849	0.0730148	0.265455	0.674503	0.0432702	0.571023		0.19243	0.311316	0.234667	0.257128	0.30021	0.237834		0.586267	0.236894	0.338659	0.183808	0.185071	0.251926		0.196795	0.242498	0.165067	0.237061	0.368169	0.194033
				5.5404	0.322313	0.241815	0.275878	0.25709	0.299653	0.280911		0.282524	0.0522984	0.239349	0.662647	0.0183339	0.617217		0.174124	0.313448	0.261691	0.207943	0.222864	0.274		0.577535	0.21441	0.337993	0.196937	0.172111	0.200155		0.161881	0.285386	0.136253	0.336006	0.433099	0.208968
				5.60127	0.323454	0.238462	0.257738	0.245977	0.291658	0.266733		0.343386	0.0641401	0.284621	0.564587	-0.0240342	0.664541		0.10907	0.303784	0.275533	0.172693	0.205979	0.247733		0.588745	0.209176	0.285514	0.197142	0.121116	0.229976		0.190614	0.245928	0.0838376	0.291977	0.422003	0.169459
				5.66215	0.317759	0.22615	0.252772	0.240794	0.278276	0.254352		0.37424	0.0730343	0.353984	0.509864	-0.0101859	0.662368		0.123692	0.318078	0.252692	0.0738984	0.162872	0.274507		0.603017	0.197294	0.282448	0.201821	0.099473	0.266896		0.166724	0.190053	0.080609	0.381972	0.447312	0.195797
				5.72302	0.307911	0.226162	0.237973	0.24217	0.256783	0.240873		0.367212	0.0804958	0.365745	0.506116	-0.0638191	0.618035		0.155642	0.323595	0.220364	0.144152	0.110998	0.223937		0.581833	0.256525	0.310414	0.239469	0.101031	0.343838		0.114075	0.210242	0.0267936	0.371094	0.456023	0.229489
				5.7839	0.288166	0.215973	0.239046	0.243552	0.255014	0.228691		0.38964	0.0894313	0.362977	0.504569	-0.101407	0.608751		0.140041	0.328346	0.242309	0.138853	0.105294	0.256626		0.592103	0.291021	0.297751	0.234174	0.128927	0.331683		0.142453	0.204552	-0.0136721	0.344899	0.369996	0.17268
				5.84478	0.283769	0.214266	0.237694	0.246229	0.24191	0.209508		0.373024	0.0651597	0.346604	0.504611	-0.159844	0.6157		0.14721	0.316822	0.206147	0.160358	0.0988105	0.277946		0.547262	0.326346	0.353719	0.228375	0.177506	0.320637		0.173168	0.22338	-0.0248909	0.349466	0.335356	0.121204
				5.90565	0.269871	0.207614	0.241424	0.248693	0.22098	0.184242		0.391982	0.100011	0.343182	0.475965	-0.190855	0.512174		0.167699	0.29299	0.204974	0.221708	0.0809824	0.242471		0.494394	0.319471	0.37545	0.21716	0.136889	0.292458		0.120067	0.291007	-0.077803	0.345019	0.353482	0.0400084
				5.96653	0.254498	0.206878	0.247722	0.249978	0.201215	0.171943		0.390407	0.0734883	0.321534	0.445336	-0.200979	0.512404		0.161404	0.290129	0.153672	0.25594	0.0435496	0.178684		0.45577	0.332919	0.342582	0.222605	0.100104	0.252585		0.0997881	0.318517	-0.10444	0.30996	0.31769	0.0339409
				6.0274	0.245609	0.202561	0.234355	0.249495	0.186358	0.162541		0.354228	0.0459066	0.278351	0.423814	-0.113811	0.496039		0.151236	0.271405	0.141134	0.334228	0.0380987	0.186444		0.434365	0.336146	0.307973	0.206753	0.0822055	0.225304		0.0628376	0.344815	-0.105429	0.319726	0.313178	0.0589365
				6.08828	0.236911	0.204067	0.227861	0.233669	0.181421	0.157198		0.278239	0.0673002	0.258181	0.411407	-0.0441147	0.480876		0.122676	0.208285	0.129944	0.388733	0.0679345	0.176134		0.497428	0.317814	0.24202	0.228049	0.0982099	0.270103		0.0279123	0.333407	-0.135897	0.232649	0.281972	0.0116787
				6.14916	0.232131	0.193409	0.225061	0.233272	0.174823	0.15313		0.263718	0.0347411	0.193717	0.377885	-0.00693257	0.423194		0.121158	0.209695	0.157298	0.405129	0.0888901	0.147873		0.463248	0.334833	0.254602	0.229689	0.0500499	0.164135		0.0343148	0.350777	-0.0959166	0.264827	0.31083	-0.00580078
				6.21003	0.214558	0.181357	0.223805	0.217494	0.164794	0.152881		0.210753	0.0552138	0.174486	0.370662	-0.0109729	0.370652		0.116306	0.167497	0.0838367	0.41946	0.0852417	0.116016		0.469486	0.278373	0.241369	0.286445	0.111556	0.0559741		-0.0305807	0.37139	-0.138118	0.254391	0.239362	-0.00709801
				6.27091	0.206695	0.180273	0.218885	0.205681	0.164629	0.139627		0.150231	0.0713014	0.144983	0.408053	0.0346964	0.288325		0.122031	0.159185	0.101894	0.398205	0.110772	0.0840471		0.438867	0.211864	0.242201	0.27989	0.110793	0.0773929		-0.0494407	0.398788	-0.163316	0.197272	0.238345	-0.0139524
				6.33178	0.194835	0.16992	0.218077	0.191671	0.145217	0.141274		0.118433	0.0374234	0.120664	0.456553	0.0538917	0.252282		0.0659691	0.156959	0.147395	0.362915	0.157197	0.108519		0.378887	0.173948	0.22568	0.317379	0.128761	0.0701356		-0.0651123	0.350458	-0.160587	0.13968	0.19206	-0.0345445
				6.39266	0.180645	0.163828	0.204054	0.172385	0.137927	0.136578		0.0843945	0.0251055	0.0925681	0.462631	0.107963	0.212559		0.0137637	0.140427	0.145078	0.330662	0.154051	0.0963731		0.399492	0.110149	0.126522	0.295625	0.136135	0.0169272		-0.0643183	0.309997	-0.154815	0.110467	0.0441419	-0.0669677
				6.45354	0.171068	0.158149	0.202116	0.161048	0.12154	0.135155		0.0357391	0.00587528	0.129465	0.476687	0.161576	0.219231		-0.00877867	0.160434	0.101566	0.374956	0.162192	0.120932		0.416323	0.0403392	0.105716	0.277989	0.108045	0.00284464		-0.0796685	0.267145	-0.134223	0.0496922	0.122188	-0.0995984
				6.51441	0.159291	0.156693	0.200584	0.144764	0.115876	0.131348		0.0569793	0.00808806	0.148125	0.492586	0.241159	0.177007		0.0243413	0.172465	0.119124	0.264491	0.186211	0.101583		0.377737	-0.0211797	0.0761346	0.284357	0.0942533	-0.0260136		-0.137613	0.246001	-0.144209	-0.0239887	0.11242	-0.127804
				6.57529	0.157883	0.15514	0.198707	0.142815	0.114189	0.139584		0.0955014	0.000511577	0.177203	0.528923	0.216675	0.2639		0.0135693	0.143893	0.112887	0.319819	0.150898	0.0940337		0.408404	-0.0595033	0.0822731	0.313922	0.137375	-0.10699		-0.156057	0.253938	-0.202963	-0.00375683	0.0739771	-0.133783
				6.63616	0.141892	0.15134	0.197677	0.139007	0.110024	0.131536		0.0689089	-0.000739301	0.121738	0.577168	0.231637	0.197227		-0.00805983	0.134351	0.130181	0.334882	0.134387	0.114647		0.340295	-0.101772	0.050127	0.34898	0.158611	-0.1279		-0.155539	0.271479	-0.223512	0.0865218	0.0947498	-0.101684

## Sheet: Figure 3C
ROI Cross Correlations
	ROI 1 vs ROI 2					ROI 1 vs ROI 3					ROI 1 vs ROI 4
	Matched		Shuffled			Matched		Shuffled			Matched		Shuffled
Lag (s)	Average	SEM	Average	SEM		Average	SEM	Average	SEM		Average	SEM	Average	SEM
-1.88648	0.00996881	0.00830014	-0.00705719	0.00697867		0.0044224	0.00406689	0.0106849	0.00790236		0.0114294	0.0109981	0.00139694	0.00256069
-1.8256	0.0137261	0.00975877	-0.00798024	0.0083526		-0.0105671	0.0074727	0.00132298	0.00930672		0.00987191	0.0085115	-0.00292181	0.00613548
-1.76472	0.0221096	0.0141977	-0.0180736	0.0113382		-0.0131197	0.0104783	0.00222239	0.0151913		0.0108985	0.0116542	-0.00305721	0.00975665
-1.70385	0.0311118	0.0173195	-0.0242049	0.0132795		-0.0131804	0.0132132	-0.000318532	0.0205893		0.0122978	0.0156452	-5.83379e-05	0.0134686
-1.64297	0.0358321	0.0211361	-0.026639	0.0152847		-0.012469	0.0164474	-0.00163893	0.0250382		0.0108997	0.0187355	0.00320073	0.0167732
-1.58209	0.031938	0.0240124	-0.0247765	0.0174446		-0.00998037	0.0201737	-0.00877471	0.029604		0.0125502	0.0217292	0.00421348	0.0207532
-1.52122	0.0248952	0.0274006	-0.0230109	0.0199934		-0.00411452	0.0237642	-0.0175265	0.0321684		0.00965004	0.024983	0.00845815	0.0229923
-1.46034	0.0151064	0.0308003	-0.0228513	0.0233409		0.00282521	0.027297	-0.0254007	0.0340714		-0.00081643	0.0284542	0.00807306	0.0257124
-1.39946	0.00495159	0.0343598	-0.0215748	0.0278456		0.0107011	0.0298079	-0.0341958	0.0348632		-0.0113617	0.0323821	0.00553565	0.0283309
-1.33859	-0.00312732	0.0383181	-0.0214893	0.0328986		0.0196465	0.0316748	-0.0449195	0.0356052		-0.0222623	0.0364495	-0.000288958	0.0305738
-1.27771	-0.00874998	0.0419152	-0.0182432	0.037226		0.0262328	0.0331279	-0.0563302	0.0367308		-0.0302391	0.0386814	-0.00847311	0.0319205
-1.21683	-0.0134524	0.0450918	-0.0179481	0.041976		0.0260825	0.0349503	-0.0650745	0.0377996		-0.0360401	0.0405614	-0.0198343	0.0336135
-1.15596	-0.0194766	0.0478137	-0.0215086	0.0458886		0.0232517	0.0375444	-0.0686804	0.0391955		-0.0365531	0.0414711	-0.0372728	0.0349673
-1.09508	-0.0238669	0.0504814	-0.0230765	0.048742		0.0166548	0.0413112	-0.0649826	0.0419743		-0.0333393	0.0422204	-0.0604671	0.0356205
-1.0342	-0.0223197	0.0527985	-0.0344164	0.0515162		0.00570709	0.0461435	-0.0582951	0.0454053		-0.0283689	0.0428129	-0.0795285	0.0370129
-0.973325	-0.0180953	0.0543797	-0.0444385	0.0541617		-0.00530506	0.050655	-0.046134	0.0488503		-0.0281214	0.0431519	-0.0949864	0.03839
-0.912448	-0.0106199	0.0547255	-0.0564714	0.0561709		-0.017779	0.0539802	-0.0298634	0.0520657		-0.0262757	0.0439312	-0.105236	0.041108
-0.851571	-0.00529012	0.0548663	-0.0667466	0.0581594		-0.0330499	0.0572502	-0.0177353	0.0551013		-0.0160153	0.0446535	-0.111496	0.0445819
-0.790694	0.00500483	0.0539186	-0.0695297	0.0607461		-0.0446205	0.0603742	-0.0104275	0.0577782		0.002686	0.046326	-0.108558	0.0475303
-0.729817	0.0202992	0.0539143	-0.0701862	0.0635222		-0.0522009	0.0617327	-0.007903	0.0599908		0.0190783	0.0492108	-0.100483	0.0504978
-0.66894	0.0408684	0.0540374	-0.069302	0.0668265		-0.0554244	0.062155	-0.00962108	0.062542		0.0374844	0.0530526	-0.0945067	0.0535335
-0.608063	0.0684348	0.0552813	-0.0628861	0.0702223		-0.0516227	0.0635613	-0.0150923	0.0650571		0.0518386	0.0566457	-0.0855749	0.0563954
-0.547187	0.0994578	0.0584356	-0.0543071	0.0736779		-0.0385642	0.0650554	-0.015375	0.0673443		0.0609305	0.0586958	-0.0723086	0.05906
-0.48631	0.128002	0.0629594	-0.0391969	0.076993		-0.0174026	0.0668437	-0.0166338	0.0701315		0.0671488	0.0606909	-0.0584511	0.0620773
-0.425433	0.15817	0.0676261	-0.0265966	0.0791096		0.0111556	0.0699399	-0.0181159	0.0729325		0.0638293	0.0631003	-0.0440882	0.0651949
-0.364556	0.188636	0.0708404	-0.0120334	0.0806694		0.0446165	0.0726112	-0.0216451	0.0757174		0.0496984	0.0659228	-0.0315696	0.0672687
-0.303679	0.221223	0.0730651	0.00138084	0.0820724		0.0821351	0.0736403	-0.0283678	0.0780461		0.0355822	0.0688635	-0.0218107	0.0689916
-0.242802	0.248902	0.0749002	0.0196261	0.0834488		0.118321	0.0750234	-0.0375978	0.0797666		0.0295126	0.0727541	-0.0151213	0.0718711
-0.181926	0.267656	0.0754974	0.0375958	0.0842163		0.143599	0.0752564	-0.0427141	0.0824353		0.0280796	0.0766577	-0.0127872	0.0744321
-0.121049	0.277838	0.074945	0.0463056	0.0844018		0.161552	0.0749157	-0.044428	0.085221		0.0337107	0.0800536	-0.00819936	0.0769801
-0.0601719	0.281427	0.074547	0.0486071	0.0844182		0.174493	0.0746879	-0.0438978	0.0862148		0.0408297	0.0817836	-0.0141787	0.0787054
0.0007049	0.283675	0.0743971	0.0395773	0.0848026		0.17976	0.07433	-0.040343	0.0871104		0.0495375	0.0815949	-0.0200336	0.0794831
0.0615817	0.26385	0.073863	0.0213059	0.0840823		0.181694	0.0718361	-0.0437795	0.0842046		0.0445014	0.0803594	-0.014769	0.0790259
0.122459	0.239141	0.073537	-0.00518654	0.0836152		0.178011	0.0694907	-0.0453163	0.0807113		0.0395138	0.0790668	-0.0164151	0.0790236
0.183335	0.211586	0.0737271	-0.030026	0.0825432		0.17143	0.0679578	-0.0489041	0.0768216		0.0423682	0.0788841	-0.0138259	0.0791654
0.244212	0.184634	0.0745411	-0.0450634	0.0814839		0.158666	0.0677638	-0.0539572	0.0737943		0.0489031	0.079031	-0.0113515	0.078731
0.305089	0.159532	0.0746431	-0.0537909	0.0794823		0.145403	0.0681732	-0.0564268	0.0712734		0.0576464	0.0784955	-0.00316027	0.0782599
0.365966	0.137922	0.0738278	-0.0566079	0.076949		0.129154	0.0680824	-0.0594401	0.0692504		0.061206	0.0765843	0.00250718	0.0766973
0.426843	0.120398	0.073269	-0.0594241	0.0749149		0.106975	0.0667151	-0.0514672	0.067584		0.0665847	0.0735564	-1.93316e-05	0.0747738
0.48772	0.108901	0.0714156	-0.0629695	0.0720751		0.0853997	0.0646226	-0.0368415	0.0654335		0.0653819	0.0703661	-0.0112953	0.0732178
0.548596	0.102595	0.0692132	-0.0639132	0.0679226		0.0668139	0.0626469	-0.0208328	0.0617356		0.0624457	0.0669728	-0.0243148	0.0699723
0.609473	0.0948655	0.0669266	-0.0621842	0.062815		0.0528566	0.0601939	-0.00918304	0.0574904		0.056674	0.0629341	-0.0465909	0.0653696
0.67035	0.0842264	0.063412	-0.0602651	0.0572871		0.0378872	0.0570449	-0.000389232	0.0525158		0.0464256	0.058551	-0.0670904	0.0608997
0.731227	0.0786593	0.0581653	-0.0551002	0.0523496		0.0283002	0.0537649	-0.000117987	0.0471544		0.0306769	0.0535803	-0.0830805	0.0584535
0.792104	0.0759341	0.0523553	-0.0480017	0.0492245		0.0211187	0.0499262	-0.00326252	0.0419284		0.0198359	0.0501655	-0.0958118	0.0567175
0.852981	0.0762921	0.0477441	-0.041857	0.0477589		0.0110472	0.0467188	-0.0125653	0.0382974		0.0114186	0.048404	-0.100106	0.054992
0.913857	0.0769678	0.0447913	-0.0372784	0.0471223		0.00330187	0.0433386	-0.0250483	0.0368333		0.00491468	0.0485588	-0.0951176	0.0535837
0.974734	0.0762931	0.0444923	-0.0361554	0.0467044		0.00290864	0.0410393	-0.0398174	0.035832		-0.000704542	0.0496511	-0.0871559	0.052172
1.03561	0.0775492	0.0435929	-0.0378789	0.0459235		0.00444973	0.0400701	-0.0551488	0.0349388		-0.00530767	0.0499415	-0.0819943	0.0495962
1.09649	0.0759392	0.0423018	-0.0383646	0.0448037		0.00582914	0.0402209	-0.0670605	0.0345997		-0.0117759	0.050139	-0.0694431	0.0475248
1.15736	0.0741551	0.0397306	-0.0375011	0.0435077		0.00758661	0.0403699	-0.0755021	0.0346079		-0.0117071	0.048889	-0.058231	0.0449039
1.21824	0.0711154	0.0368368	-0.035912	0.0425391		0.00689819	0.0404083	-0.0779261	0.0344627		-0.010171	0.046723	-0.0484228	0.041929
1.27912	0.0658395	0.0334229	-0.0335156	0.0409204		0.0078819	0.0394407	-0.0780929	0.0340797		-0.00550781	0.0436938	-0.0331957	0.0383952
1.34	0.0631787	0.0293203	-0.0306699	0.0385657		0.00527476	0.0385752	-0.073814	0.0335572		-0.00458294	0.0401429	-0.0197468	0.0348463
1.40087	0.060962	0.0253828	-0.0281255	0.0352318		0.0037424	0.0374898	-0.0656285	0.0327454		-0.00620582	0.0364488	-0.0090892	0.0323245
1.46175	0.0604351	0.0225673	-0.0272011	0.0309819		-9.64358e-05	0.0349912	-0.0553128	0.031145		-0.00685692	0.0321455	0.000844884	0.0312098
1.52263	0.0576571	0.0195008	-0.0260658	0.0259648		-0.00497868	0.0322101	-0.0389007	0.0276414		-0.00521725	0.0275988	0.00387616	0.029326
1.5835	0.0520291	0.0163634	-0.0242057	0.0209553		-0.00875982	0.0279311	-0.0241451	0.0241077		-0.00473325	0.0227834	0.000620236	0.0259929
1.64438	0.045375	0.0135899	-0.0225201	0.0158473		-0.0102713	0.0230417	-0.0128699	0.0200004		-0.00316673	0.0176376	-0.00371265	0.0211833
1.70526	0.0351722	0.0108561	-0.0179111	0.0111971		-0.0126228	0.017992	-0.00575123	0.0160358		-0.00376225	0.0131521	-0.00604158	0.0164735
1.76613	0.0223216	0.00793765	-0.0137787	0.00732975		-0.0127454	0.0127118	-0.00249522	0.0121106		-0.00231285	0.00953938	-0.00815425	0.0123764
1.82701	0.0112785	0.00509022	-0.0075354	0.00438995		-0.00857933	0.00785211	-0.00181412	0.00813503		-0.00194024	0.00696929	-0.00707624	0.00906922

## Sheet: Figure 3D-E
Single Cell Correlation vs Distance
Matched				Shuffled					Population Correlation vs Distance
Raw Data		Binned Average		Raw Data		Binned Average			Cell 1			Cell 2			Cell 3			Cell 4			Cell 5			Cell 6			Average
Distance	Correlation	Distance	Correlation	Distance	Correlation	Distance	Correlation		Distance (µm)	Matched	Shuffled	Distance (µm)	Matched	Shuffled	Distance (µm)	Matched	Shuffle	Distance (µm)	Matched	Shuffled	Distance (µm)	Matched	Shuffled	Distance (µm)	Matched	Shuffled	Distance (µm)	Matched	Shuffle
0		3.34242e-06	0.211162	0		3.34242e-06	-0.00234193		3.34242	0.199367	-0.00142009	3.49865	0.157812	-0.0188941	5.26598	0.223832	-0.0628503	3.74552	0.107736	-0.110958	3.34242	0.199367	-0.00142009	2.66392	0.169924	0.000827966	2.66392	0.169924	0.000827966
7.89512e-06	0.172385	4.76782e-06	0.127566	7.89512e-06	-0.0251774	4.76782e-06	-0.0256326		4.76782	0.12041	-0.0154258	5.02536	0.140881	-0.0431049	6.8398	0.142219	-0.0044512	5.23355	0.0782832	-0.018795	4.76782	0.12041	-0.0154258	4.34294	0.0927487	-0.00875366	3.65673	0.161065	-0.0088139
1.28038e-05	-0.0713286	7.00885e-06	0.0880647	1.28038e-05	-0.0707058	7.00885e-06	-0.00487994		7.00885	0.0931028	-0.00132782	6.94968	0.0174049	-0.0200871	8.91952	0.0205181	-0.0149979	7.03094	0.0303435	-0.0131913	7.00885	0.0931028	-0.00132782	7.48154	0.0419988	-0.00759011	4.64954	0.115321	-0.0258557
1.63126e-05	0.0394417	8.99908e-06	0.0673876	1.63126e-05	-0.0954342	8.99908e-06	2.71311e-06		8.99908	0.0594792	0.0035994	9.05458	0.0675707	-0.0316453	11.0704	0.0485392	-0.0108973	9.00041	-0.00480138	-0.000667056	8.99908	0.0594792	0.0035994	10.5215	0.067359	0.00125235	5.64235	0.110705	-0.0217083
2.04844e-05	0.0261682	1.10345e-05	0.0635449	2.04844e-05	-0.0795011	1.10345e-05	0.00269651		11.0344	0.0529135	0.0060818	10.9456	0.00102259	-0.0354805	13.0128	0.0525795	-0.00105175	11.13	0.0304841	0.000109552	11.0344	0.0529135	0.0060818	13.5495	0.0278592	0.00160085	6.63516	0.0803855	-0.01093
2.4791e-05	0.156743	1.31283e-05	0.0482798	2.4791e-05	-0.107396	1.31283e-05	-0.0133157		13.1283	0.0460999	-0.0128102	13.0189	0.0239109	-0.000273149	15.1005	0.0823672	-0.00160677	12.8252	0.0485304	0.00604112	13.1283	0.0460999	-0.0128102	16.5043	0.0273156	-0.00649539	7.62798	0.0596439	-0.00806814
2.94247e-05	-0.0165852	1.4833e-05	0.0382885	2.94247e-05	0.0316785	1.4833e-05	-0.00227518		14.833	0.0297457	0.000683269	15.0953	0.034009	-0.0117255	16.912	0.090006	0.00780983	15.1516	-0.000780323	-0.00454189	14.833	0.0297457	0.000683269	19.466	0.0446685	-0.000745091	8.62079	0.0467413	-0.007463
3.14392e-05	-0.171693	1.70331e-05	0.0432828	3.14392e-05	0.0433818	1.70331e-05	-0.0106037		17.0331	0.0405455	-0.0136612	17.0274	0.0186972	-0.0171098	19.1009	0.0990737	-0.00746994	16.931	-0.00393646	-0.00444244	17.0331	0.0405455	-0.0136612	22.4765	0.0322951	0.00493363	9.6136	0.0429327	-0.00659796
3.41978e-05	0.0543183	1.90477e-05	0.0240261	3.41978e-05	0.0300978	1.90477e-05	-0.0216425		19.0477	0.0276086	-0.0219171	19.0843	0.0447519	-0.0222552	20.8639	0.0768491	0.0016606	18.9249	0.024887	0.00280847	19.0477	0.0276086	-0.0219171	25.4704	0.030637	0.0015407	10.6064	0.0420169	-0.00571237
3.86852e-05	0.0558246	2.0933e-05	0.0507383	3.86852e-05	0.0400226	2.0933e-05	-0.0185378		20.933	0.0432788	-0.0175227	20.9489	0.0153224	-0.019429	22.9517	-0.00492068	0.0240521	21.0189	-0.0082263	-0.0174422	20.933	0.0432788	-0.0175227	28.5278	0.0364273	-0.00893346	11.5992	0.0414679	-0.00458312
4.17939e-05	-0.0702819	2.31065e-05	0.0252823	4.17939e-05	-0.0164249	2.31065e-05	-0.0188982		23.1065	0.0222041	-0.0244454	22.8312	0.0181012	-0.0351366	24.8515	0.053798	-0.00970856	22.9174	0.00607201	-0.00748962	23.1065	0.0222041	-0.0244454	31.3992	0.0282571	0.000622599	12.592	0.0421649	-0.00332237
4.80797e-05	0.0730444	2.5121e-05	0.0539327	4.80797e-05	-0.127174	2.5121e-05	-0.0126025		25.121	0.0555297	-0.0163046	25.0143	0.00953386	-0.0186036	26.9744	-0.00317439	-0.0171162	24.9472	0.013905	0.0178967	25.121	0.0555297	-0.0163046	34.4452	0.0220833	-0.000915702	13.5848	0.0385212	-0.00315031
5.14265e-05	0.117402	2.69175e-05	0.0393238	5.14265e-05	-0.0204835	2.69175e-05	-0.0193394		26.9175	0.0352028	-0.0209373	26.8689	-0.0141683	-0.00173713	29.1146	-0.0151569	0.0205945	26.9944	0.00569057	-0.0107122	26.9175	0.0352028	-0.0209373	37.4172	0.0175996	0.00558816	14.5777	0.034974	-0.0026935
5.64845e-05	0.162168	2.91252e-05	0.0330152	5.64845e-05	-0.0188654	2.91252e-05	-0.0234704		29.1252	0.0331385	-0.0239236	28.9957	0.0301188	0.00394924	31.1725	0.0749391	-0.0401966	29.0037	-0.003353	0.000906103	29.1252	0.0331385	-0.0239236	40.4398	0.0255467	0.00259144	15.5705	0.0345481	-0.00481979
5.97056e-05	-0.0301131	3.09662e-05	0.0606548	5.97056e-05	-0.0627215	3.09662e-05	-0.0158563		30.9662	0.0616057	-0.0169843	30.8932	0.00318719	0.00986828	32.7331	0.0298727	0.0160009	31.1892	-0.0248703	-0.00858325	30.9662	0.0616057	-0.0169843	43.4436	0.0180408	0.00137051	16.5633	0.0352945	-0.00697657
6.54665e-05	0.0200723	3.31428e-05	0.0360274	6.54665e-05	0.0873831	3.31428e-05	-0.00760875		33.1428	0.0277371	-0.00761539	33.0741	0.0342501	-0.00271278	34.9463	0.0290945	-0.0156241	33.0301	0.0115466	-0.000813771	33.1428	0.0277371	-0.00761539	46.4946	0.0231291	0.00329916	17.5561	0.0385033	-0.00889174
6.89494e-05	-0.00232258	3.48527e-05	0.0538231	6.89494e-05	0.0718499	3.48527e-05	-0.0135847		34.8527	0.051453	-0.0251983	34.878	0.000187832	0.0231884	37.0284	-0.0283306	-0.000435178	34.8974	0.0259525	-0.0324042	34.8527	0.051453	-0.0251983	49.4663	0.00425646	0.012637	18.5489	0.0425211	-0.0108939
2.02457e-05	0.0817829	3.69665e-05	0.0520794	2.02457e-05	-0.0397198	3.69665e-05	-0.0233947		36.9665	0.0396393	-0.0245987	36.9367	-0.0212086	0.00382399	38.7721	0.0280925	-0.03437	37.132	0.00998282	-0.0145741	36.9665	0.0396393	-0.0245987	52.4458	0.0171513	-0.00137042	19.5417	0.0423281	-0.0120065
3.23511e-05	0.0549741	3.89696e-05	0.0546312	3.23511e-05	-0.0222513	3.89696e-05	-0.016806		38.9696	0.0512474	-0.0145679	39.0245	-0.0329662	0.0106727	41.1243	0.0379505	-0.00158313	38.9881	-0.00492263	-0.021033	38.9696	0.0512474	-0.0145679	55.4242	0.00416585	0.00890556	20.5345	0.0370844	-0.0114155
3.46042e-05	0.0763959	4.1055e-05	0.0358884	3.46042e-05	0.123575	4.1055e-05	-0.01848		41.055	0.0245151	-0.0145608	40.8969	-0.00882338	0.00176566	42.9735	0.0535151	-0.0179395	41.213	0.0051433	-0.0269286	41.055	0.0245151	-0.0145608	58.4399	0.0125611	0.0232461	21.5273	0.0289789	-0.0109909
3.77594e-05	0.0154726	4.27917e-05	0.0555269	3.77594e-05	0.0687192	4.27917e-05	-0.00732317		42.7917	0.0526348	-0.0063579	42.9975	-0.038467	0.0148941	45.0525	0.0355243	-0.0248907	43.0775	0.0169626	0.00706192	42.7917	0.0526348	-0.0063579	61.5677	-0.0698284	0.00894571	22.5202	0.0201256	-0.0104935
4.21258e-05	-0.0428499	4.50401e-05	0.0751809	4.21258e-05	0.0867149	4.50401e-05	-0.00759815		45.0401	0.069412	-0.00257431	44.9606	-0.0153639	0.00405423	46.9825	0.00348307	-0.0298626	44.9806	0.0126439	0.0077041	45.0401	0.069412	-0.00257431	64.5653	0.0200219	0.022764	23.513	0.0209668	-0.00963037
4.65032e-05	0.0593598	4.68153e-05	0.0865713	4.65032e-05	-0.0813921	4.68153e-05	-0.00852633		46.8153	0.0734986	-0.00880858	47.0663	0.0194357	0.021824	49.1187	0.0478733	-0.00217524	47.0676	0.0232222	0.00304836	46.8153	0.0734986	-0.00880858	67.6898	0.0216569	0.0311752	24.5058	0.0314531	-0.00809836
5.14484e-05	0.044853	4.91394e-05	0.0622127	5.14484e-05	0.00990592	4.91394e-05	-0.0126296		49.1394	0.0604417	-0.0104253	48.9397	0.0143812	0.0451552	51.1338	-0.0230623	0.00810488	49.0154	-0.00699004	-0.0107853	49.1394	0.0604417	-0.0104253	70.5399	0.0246483	-0.00501679	25.4986	0.030779	-0.00818113
5.52406e-05	-0.0428862	5.10439e-05	0.0486692	5.52406e-05	0.0502958	5.10439e-05	-0.0151033		51.0439	0.0368264	-0.0207021	51.201	0.0516412	-0.026851	53.0304	0.0393729	-0.0289604	50.9309	-0.0593047	0.0527348	51.0439	0.0368264	-0.0207021	73.5162	0.0315585	-0.0180939	26.4914	0.0201286	-0.0109862
5.87402e-05	0.0299491	5.30259e-05	0.0253109	5.87402e-05	0.0835546	5.30259e-05	-0.0262804		53.0259	0.023777	-0.0235786	52.6029	0.0976022	-0.0205153	54.7666	0.00867308	-0.0184415	52.9435	0.00341436	-0.00691988	53.0259	0.023777	-0.0235786	76.4343	-0.0281741	-0.00987445	27.4842	0.0166499	-0.0108119
6.33612e-05	0.0325085	5.50433e-05	0.0513327	6.33612e-05	-0.00582387	5.50433e-05	-0.0044083		55.0433	0.0465662	-0.00834978	55.148	0.00947444	0.00316851	56.8752	-0.00960262	-0.017092	54.8459	-0.0174721	0.0411383	55.0433	0.0465662	-0.00834978	79.4539	-0.0480879	-0.0281033	28.477	0.0184281	-0.0075117
6.69144e-05	0.00913015	5.67723e-05	0.0182622	6.69144e-05	0.00855607	5.67723e-05	-0.00401446		56.7723	0.0116313	-0.00543792	56.8429	0.0598812	-0.0184141	59.005	0.00863808	-0.00901476	56.906	-0.0268099	0.0118854	56.7723	0.0116313	-0.00543792	82.6467	-0.0781649	0.0514101	29.4698	0.0210874	-0.00610599
7.06894e-05	-0.0341873	5.91131e-05	0.0159911	7.06894e-05	-0.0684966	5.91131e-05	-0.0134803		59.1131	0.0157245	-0.0129767	59.0236	0.0898456	0.0274848	61.2845	0.0920469	-0.0150059	59.1048	0.0203859	0.0201611	59.1131	0.0157245	-0.0129767	85.2264	0.013322	0.00274236	30.4626	0.0290007	-0.00939833
6.85861e-05	-0.214929	6.10702e-05	0.0364529	6.85861e-05	-0.189888	6.10702e-05	0.0173306		61.0702	0.0343493	0.0218476	61.109	-0.0325747	0.0333515	63.0246	0.0252519	-0.00816306	60.7059	-0.00549712	0.000791558	61.0702	0.0343493	0.0218476	88.8515	-0.0140155	0.0456543	31.4555	0.0324145	-0.0100006
7.40662e-05	-0.0489433	6.31426e-05	0.0487948	7.40662e-05	0.0253861	6.31426e-05	-0.0255917		63.1426	0.0547731	-0.0217806	62.9472	0.0266264	-0.00926351	65.07	-0.0224657	-0.00105894	62.9523	-0.0536869	0.021748	63.1426	0.0547731	-0.0217806	91.7792	0.0452935	-0.00217048	32.4483	0.0277815	-0.00295744
7.67182e-05	0.0322152	6.50983e-05	0.01944	7.67182e-05	-0.0152792	6.50983e-05	-0.00397221		65.0983	0.0196926	-0.0067141	64.9026	0.013594	-0.043938	67.1074	-0.00386169	-0.0178037	65.0962	0.014868	-0.0456906	65.0983	0.0196926	-0.0067141	93.7719	-0.0538323	0.0602762	33.4411	0.0265884	-0.00351675
8.11264e-05	-0.0273405	6.71634e-05	0.0395937	8.11264e-05	0.0628802	6.71634e-05	-0.00370852		67.1634	0.0247614	-0.00663244	67.1694	0.0795316	-0.0504578	69.1349	0.0185582	-0.00618983	67.025	0.0114569	-0.0107298	67.1634	0.0247614	-0.00663244	97.3935	-0.137394	0.0448573	34.4339	0.0289367	-0.00979106
8.56194e-05	0.0875448	6.89272e-05	0.0304922	8.56194e-05	0.0476735	6.89272e-05	-0.0406212		68.9272	0.0238147	-0.0389729	68.7869	-0.023807	0.0137726	70.8018	0.0583001	0.036738	68.9443	0.029644	0.0182421	68.9272	0.0238147	-0.0389729				35.4267	0.0249322	-0.011852
8.98634e-05	-0.0961559	7.10708e-05	0.00443287	8.98634e-05	0.00402026	7.10708e-05	0.00818129		71.0708	-0.00191588	0.0095143	71.2925	0.0221223	0.0744503	73.2276	0.0256238	-0.000873178	70.9231	0.032145	0.014256	71.0708	-0.00191588	0.0095143				36.4195	0.0153669	-0.010425
9.21663e-05	0.000681907	7.29253e-05	0.0581392	9.21663e-05	-0.0049202	7.29253e-05	0.00698871		72.9253	0.0624578	0.0150584	72.7286	0.0508693	-0.0834865	75.2522	0.0537076	0.0522711	72.7476	0.0718574	-0.047671	72.9253	0.0624578	0.0150584				37.4123	0.0116649	-0.00953779
9.02863e-05	0.038335	7.51303e-05	0.0466169	9.02863e-05	0.00568813	7.51303e-05	-0.0171894		75.1303	0.0535799	-0.0167956	74.9249	-0.00958861	-0.0509741	76.6717	0.0472243	0.0387174	75.1782	0.045352	0.0252154	75.1303	0.0535799	-0.0167956				38.4051	0.0171079	-0.0112953
8.85465e-05	0.15812	7.69865e-05	0.0345726	8.85465e-05	-0.0360975	7.69865e-05	-0.00342444		76.9865	0.0287567	-0.00079906	77.2517	0.0218838	-4.19e-05	79.1914	-0.0205613	-0.0153949	76.8443	-0.0247288	-0.112155	76.9865	0.0287567	-0.00079906				39.3979	0.0189695	-0.0107297
8.82759e-05	0.0364648	7.89946e-05	0.0359868	8.82759e-05	-0.0651814	7.89946e-05	0.00188275		78.9946	0.0231854	0.00410437				81.0585	0.0303239	81.0585	78.8274	0.0174039	-0.0540798	78.9946	0.0231854	0.00410437				40.3908	0.018738	-0.00981171
8.80701e-05	-2.85965e-05	8.10117e-05	0.0350343	8.80701e-05	-0.0705346	8.10117e-05	0.0229954		81.0117	0.0301539	0.0108214				82.8188	0.00500553	82.8188	81.2084	-0.0393842	0.0344831	81.0117	0.0301539	0.0108214				41.3836	0.0189207	-0.0077829
8.97324e-05	0.117347	8.30461e-05	0.0543512	8.97324e-05	-0.0058721	8.30461e-05	-0.0111734		83.0461	0.0231198	-0.00452454				84.9753	-0.138584	84.9753	83.3969	0.0196129	0.02839	83.0461	0.0231198	-0.00452454				42.3764	0.0239721	-0.00369994
9.17161e-05	-0.00158742	8.52617e-05	0.0482744	9.17161e-05	-0.192738	8.52617e-05	0.0094832		85.2617	0.0537393	0.00295156				86.8811	0.0137899	86.8811	84.4684	-0.0420442	0.00450128	85.2617	0.0537393	0.00295156				43.3692	0.0274024	-0.00143868
9.33973e-05	0.0600661	8.70594e-05	0.0671364	9.33973e-05	-0.037788	8.70594e-05	-0.0129276		87.0594	0.0760508	-0.0200647				89.1359	0.0862013	89.1359	87.3898	-0.19691	0.03066	87.0594	0.0760508	-0.0200647				44.362	0.030236	-0.00220114
9.72624e-05	-0.0987668	8.90447e-05	0.0283178	9.72624e-05	-0.139287	8.90447e-05	0.014958		89.0447	0.0470038	0.00227178				90.8752	-0.0305653	90.8752				89.0447	0.0470038	0.00227178				45.3548	0.0329497	-0.00269995
7.99583e-05	0.0212299	9.09443e-05	0.0142335	7.99583e-05	0.0349225	9.09443e-05	0.0190283		90.9443	0.00488821	0.0224907				92.6434	-0.221666	92.6434				90.9443	0.00488821	0.0224907				46.3476	0.0348136	-0.00315658
7.76094e-05	0.0215922	9.2724e-05	0.0190528	7.76094e-05	0.0291943	9.2724e-05	0.018844		92.724	0.0282248	0.0308755				95.1607	0.0773377	95.1607				92.724	0.0282248	0.0308755				47.3404	0.0345772	-0.00187753
7.14119e-05	-0.04511	9.4794e-05	0.0306574	7.14119e-05	0.129786	9.4794e-05	-0.0245066		94.794	0.0535039	-0.0194844				96.8336	-0.04508	96.8336				94.794	0.0535039	-0.0194844				48.3333	0.0320925	0.00144235
0.000100104	0.137076	9.71662e-05	0.0097381	0.000100104	0.0222236	9.71662e-05	-0.0294363		97.1662	0.0235874	-0.0172991				98.705	-0.0501029	98.705				97.1662	0.0235874	-0.0172991				49.3261	0.0278744	0.00343087
9.97914e-05	0.15173	9.88979e-05	0.0466727	9.97914e-05	-0.0556578	9.88979e-05	0.00432386		98.8979	0.042796	-0.0178186				101.419	-0.223667	101.419				98.8979	0.042796	-0.0178186				50.3189	0.01662	0.0021127
9.86095e-05	0.0913811	0.000100897	0.0763282	9.86095e-05	-0.0468683	0.000100897	0.0181625		100.897	0.0734866	0.0302746				102.914	-0.0361498	102.914				100.897	0.0734866	0.0302746				51.3117	0.012166	-0.00308249
0.000102568	0.0102976	0.000102695	-0.00272324	0.000102568	0.0390303	0.000102695	0.012832		102.695	-0.0107071	0.0096322				105.056	-0.0915964	105.056				102.695	-0.0107071	0.0096322				52.3045	0.0267316	-0.0117312
0.000104669	0.0230772	0.000105158	0.0394038	0.000104669	0.156979	0.000105158	0.037757		105.158	0.0688195	0.0235282				106.405	0.0772825	106.405				105.158	0.0688195	0.0235282				53.2973	0.0291444	-0.0134783
0.000105536	0.148927	0.000107183	0.0360599	0.000105536	0.0512383	0.000107183	-0.0262827		107.183	0.0919379	-0.0531258				108.341	-0.171473	108.341				107.183	0.0919379	-0.0531258				54.2901	0.021689	-0.00368686
0.000106891	0.0875965	0.000109885	0.0365543	0.000106891	-0.0812335	0.000109885	-0.0259245		109.885	0.0478505	-0.0379597										109.885	0.0478505	-0.0379597				55.2829	0.0144105	0.00179941
0.000107307	0.0231702	0.00011088	-0.0119693	0.000107307	-0.0286755	0.00011088	-0.0332422		110.88	-0.0389672	0.0131869										110.88	-0.0389672	0.0131869				56.2757	0.010753	-0.00123789
0.000109885	0.0365543			0.000109885	0.0394372																						57.2686	0.0124613	-0.00136688
0.000113306	-0.0515786			0.000113306	0.0298124																						58.2614	0.0207431	0.00308722
7.89512e-06	0.172385			7.89512e-06	0.139876																						59.2542	0.0228807	0.00590117
0				0																							60.247	0.0153375	0.00906208
5.83789e-06	-0.0546254			5.83789e-06	-0.100467																						61.2398	0.00932451	0.0113674
1.02022e-05	0.0941118			1.02022e-05	-0.0913182																						62.2326	0.0104546	0.00297081
1.43174e-05	0.0371155			1.43174e-05	-0.115736																						63.2254	0.0144703	-0.00570078
1.88028e-05	0.0382439			1.88028e-05	0.0112994																						64.2182	0.0138218	-0.00995306
2.34056e-05	-0.170236			2.34056e-05	0.0241996																						65.2111	0.0127255	-0.0132615
2.67474e-05	0.0252668			2.67474e-05	-0.0212333																						66.2039	0.0196558	-0.0116396
2.99813e-05	-0.0124004			2.99813e-05	0.0490412																						67.1967	0.0264806	-0.00990731
3.48112e-05	0.134838			3.48112e-05	0.169545																						68.1895	0.0192594	-0.00679525
3.77358e-05	0.069884			3.77358e-05	-0.0961614																						69.1823	0.0163002	-0.0030066
4.41079e-05	0.0863781			4.41079e-05	0.0365943																						70.1751	0.0196889	0.0103129
4.7546e-05	0.277186			4.7546e-05	-0.0112445																						71.1679	0.0232834	0.0200461
5.27686e-05	0.0498225			5.27686e-05	0.0396413																						72.1607	0.0398048	-0.00328477
5.59846e-05	-0.0754678			5.59846e-05	0.0796093																						73.1535	0.0478365	-0.0175664
6.14647e-05	0.129423			6.14647e-05	0.0944371																						74.1464	0.0400926	-0.0110777
6.46763e-05	0.135738			6.46763e-05	-0.0210335																						75.1392	0.0327476	-0.00331605
1.91714e-05	0.022166			1.91714e-05	-0.0744626																						76.132	0.0200076	-0.0101928
3.29846e-05	0.0690265			3.29846e-05	-0.0444104																						77.1248	0.0100755	-0.0154562
3.43126e-05	0.143693			3.43126e-05	0.153166																						78.1176	0.00452263	-0.0166619
3.62626e-05	0.0416443			3.62626e-05	-0.00235187																						79.1104	-0.00127598	-0.0148513
4.01789e-05	0.106444			4.01789e-05	0.106431																						80.1032	-0.00178202	-0.000232807
4.47385e-05	0.0463346			4.47385e-05	-0.04129																						81.096	-0.00215051	0.0164503
4.99508e-05	0.00975136			4.99508e-05	0.00503865																						82.0889	-0.00403912	0.0132957
5.36322e-05	-0.0517175			5.36322e-05	0.0956718																						83.0817	-0.00337907	0.0079999
5.69987e-05	-0.0118514			5.69987e-05	0.121945																						84.0745	-0.0101687	0.00604941
6.14274e-05	0.0140573			6.14274e-05	0.0565321																						85.0673	-0.0190478	0.00662304
6.47177e-05	-0.0588924			6.47177e-05	-0.00971248																						86.0601	-0.00878852	0.00972064
6.78893e-05	-0.145426			6.78893e-05	0.0272603																						87.0529	-0.00165111	0.0103094
6.56069e-05	-0.161506			6.56069e-05	-0.109646																						88.0457	0.0416227	0.0030455
7.09479e-05	-0.0545642			7.09479e-05	0.0866361																						89.0385	0.0417589	-0.0011246
7.32113e-05	0.0895755			7.32113e-05	0.0959972																						90.0313	0.0215584	0.00934457
7.74421e-05	0.152108			7.74421e-05	-0.0112833																						91.0242	-0.00119786	0.0196156
8.18034e-05	0.139921			8.18034e-05	0.0828142																						92.017	-0.0206469	0.0175348
8.59716e-05	-0.0356947			8.59716e-05	-0.0650847																						93.0098	-0.0326592	0.018448
8.83657e-05	0.0141459			8.83657e-05	0.00115088																						94.0026	-0.00792417	0.0038717
8.68388e-05	0.105147			8.68388e-05	-0.0773563																						94.9954	0.0193932	-0.0149445
8.54388e-05	0.196784			8.54388e-05	0.0752552																						95.9882	-0.00282532	-0.00382928
8.54665e-05	0.043873			8.54665e-05	-0.0268531																						96.981	-0.0303767	0.0100512
8.56834e-05	0.0493717			8.56834e-05	-0.0580462																						97.9738	0.00565028	0.00781988
8.76164e-05	0.123104			8.76164e-05	0.0165871																						98.9666	0.00695629	0.0141579
8.9982e-05	0.12694			8.9982e-05	-0.0012588																						99.9595	-0.00404441	0.0226926
9.10505e-05	0.048036			9.10505e-05	0.0274775																						100.952	-0.0173198	0.0299274
9.50259e-05	0.0782966			9.50259e-05	-0.103599																						101.945	-0.0362934	0.0197673
7.81702e-05	0.0535416			7.81702e-05	-0.0154191																						102.938	-0.014165	0.016619
7.61805e-05	0.0320247			7.61805e-05	0.00662175																						103.931	-0.00135691	0.0198727
7.01956e-05	0.131325			7.01956e-05	0.100518																						104.924	0.0114512	0.0231264
9.7194e-05	0.0525771			9.7194e-05	0.00312038																						105.916	0.057003	-0.00198402
9.66635e-05	0.0413965			9.66635e-05	-0.0591368																						106.909	0.0633937	-0.0205475
9.48994e-05	0.0293128			9.48994e-05	-0.11704																						107.902	0.0151291	-0.00436711
9.8821e-05	-0.0113602			9.8821e-05	-0.00314911																						108.895	0.0640114	-0.0435191
0.000101075	0.032807			0.000101075	0.01437																						109.888	0.0476604	-0.0378477
0.000102113	0.0479419			0.000102113	0.145461																						110.88	-0.0389672	0.0131869
0.000103742	-0.113038			0.000103742	0.0909442
0.0001045	-0.0381633			0.0001045	0.0055673
0.000107351	-0.00258709			0.000107351	0.0651205
0.00011088	-0.0119693			0.00011088	-0.171706
1.28038e-05	-0.0713287			1.28038e-05	0.0849576
5.83789e-06	-0.0546254			5.83789e-06	-0.042405
0				0
4.52454e-06	0.184827			4.52454e-06	-0.0233237
8.51326e-06	0.109921			8.51326e-06	0.080479
1.29981e-05	0.0788563			1.29981e-05	0.0553551
1.75808e-05	-0.0458504			1.75808e-05	0.0173835
2.124e-05	0.075769			2.124e-05	-0.0620292
2.46201e-05	-0.0105594			2.46201e-05	0.0585031
2.95365e-05	-0.112242			2.95365e-05	-0.00420267
3.23612e-05	-0.0357454			3.23612e-05	-0.0258048
3.87241e-05	-0.0534334			3.87241e-05	-0.0215311
4.2178e-05	-0.0253621			4.2178e-05	0.0946206
4.74382e-05	0.00797466			4.74382e-05	0.0200299
5.06398e-05	0.0348262			5.06398e-05	-0.117767
5.60055e-05	-0.0122835			5.60055e-05	0.0593366
5.91254e-05	0.0439162			5.91254e-05	-0.0456052
1.61369e-05	0.0332667			1.61369e-05	0.0332263
3.03533e-05	0.07458			3.03533e-05	0.152019
3.10228e-05	0.010694			3.10228e-05	-0.0791356
3.21809e-05	0.0414423			3.21809e-05	-0.102291
3.57752e-05	0.0373632			3.57752e-05	-0.013029
4.03738e-05	-0.108751			4.03738e-05	0.00814123
4.5675e-05	-0.0869871			4.5675e-05	0.00445862
4.92638e-05	-0.0132236			4.92638e-05	-0.140076
5.25349e-05	-0.102715			5.25349e-05	0.0419149
5.68384e-05	-0.0681308			5.68384e-05	0.107782
5.99836e-05	-0.14265			5.99836e-05	0.00854627
6.28691e-05	-0.131266			6.28691e-05	0.0247467
6.05189e-05	-0.0226539			6.05189e-05	-0.0511808
6.57863e-05	-0.0719904			6.57863e-05	0.0429913
6.78959e-05	0.0436018			6.78959e-05	-0.00941189
7.20556e-05	0.0924329			7.20556e-05	0.0228411
7.6366e-05	0.0516959			7.6366e-05	0.0140523
8.05042e-05	-0.00968711			8.05042e-05	0.0662307
8.29243e-05	0.0864628			8.29243e-05	-0.0132431
8.15195e-05	0.0733506			8.15195e-05	-0.0983075
8.02483e-05	-0.0175819			8.02483e-05	-0.0958517
8.0395e-05	-0.00685653			8.0395e-05	-0.0239194
8.07918e-05	0.0336611			8.07918e-05	-0.0322339
8.28423e-05	0.144198			8.28423e-05	0.00858104
8.53822e-05	0.0331107			8.53822e-05	0.029988
8.61645e-05	0.00356716			8.61645e-05	-0.0405291
9.01807e-05	-0.0388274			9.01807e-05	-0.0181417
7.35795e-05	0.0840581			7.35795e-05	-0.0675584
7.17773e-05	-0.0882956			7.17773e-05	-0.0796246
6.59302e-05	-0.0735739			6.59302e-05	-0.0652405
9.20608e-05	-0.0276683			9.20608e-05	-0.0811728
9.14471e-05	0.0434345			9.14471e-05	0.0454743
8.94796e-05	-0.0509558			8.94796e-05	0.027776
9.33849e-05	0.0336937			9.33849e-05	0.0207122
9.56875e-05	0.0485123			9.56875e-05	0.0386102
9.67824e-05	-0.0877283			9.67824e-05	-0.0644241
9.85085e-05	0.0408126			9.85085e-05	-0.062945
9.93969e-05	-0.00240524			9.93969e-05	0.0344186
0.000102356	0.0439056			0.000102356	-0.0221651
0.000105926	0.023774			0.000105926	0.0891904
1.63126e-05	0.0394417			1.63126e-05	0.00673725
1.02022e-05	0.0941118			1.02022e-05	0.140612
4.52454e-06	0.184827			4.52454e-06	-0.000630041
0				0
4.20588e-06	0.0579766			4.20588e-06	-0.00534719
8.64908e-06	0.0230998			8.64908e-06	-0.0438649
1.32876e-05	-0.0300856			1.32876e-05	-0.344606
1.67174e-05	0.0185562			1.67174e-05	-0.095678
2.01213e-05	0.00453474			2.01213e-05	-0.0137189
2.5056e-05	0.00655745			2.5056e-05	0.0459924
2.78534e-05	0.126448			2.78534e-05	-0.0139564
3.42122e-05	-0.0958547			3.42122e-05	0.00458833
3.76678e-05	-0.0359758			3.76678e-05	0.0348176
4.29337e-05	0.106889			4.29337e-05	-0.00617088
4.61318e-05	0.133925			4.61318e-05	0.176231
5.14825e-05	-0.0297379			5.14825e-05	0.154096
5.46024e-05	0.0558164			5.46024e-05	0.00525917
1.34531e-05	0.10128			1.34531e-05	0.0529114
2.75118e-05	0.0780404			2.75118e-05	0.00782647
2.76929e-05	0.108084			2.76929e-05	0.0789385
2.83046e-05	0.0550698			2.83046e-05	0.0160289
3.16834e-05	0.0264215			3.16834e-05	0.0190619
3.62854e-05	-0.0803884			3.62854e-05	0.110338
4.16185e-05	-0.0573151			4.16185e-05	-0.120962
4.51478e-05	0.00502475			4.51478e-05	-0.190969
4.8363e-05	0.00342163			4.8363e-05	0.030066
5.25985e-05	0.0535243			5.25985e-05	-0.0425561
5.56743e-05	-0.0431171			5.56743e-05	-0.0868965
5.84455e-05	-0.0196526			5.84455e-05	-0.151203
5.60738e-05	-0.00533977			5.60738e-05	-0.132538
6.13173e-05	-0.149282			6.13173e-05	-0.0374434
6.33904e-05	0.143071			6.33904e-05	0.124067
6.75387e-05	0.0345654			6.75387e-05	0.0327747
7.18438e-05	0.0412015			7.18438e-05	0.0987031
7.59802e-05	0.0362708			7.59802e-05	0.151778
7.84017e-05	0.109983			7.84017e-05	0.119953
7.70119e-05	-0.147633			7.70119e-05	0.0443168
7.57685e-05	0.139128			7.57685e-05	0.0762594
7.59486e-05	0.0662861			7.59486e-05	-0.122232
7.64065e-05	0.0326142			7.64065e-05	0.0874233
7.85016e-05	0.0221989			7.85016e-05	-0.0294012
8.11137e-05	-0.0480598			8.11137e-05	-0.0361709
8.17794e-05	-0.0379669			8.17794e-05	0.0208334
8.58095e-05	0.0357222			8.58095e-05	-0.0248986
6.93224e-05	0.074423			6.93224e-05	-0.0204153
6.76099e-05	-0.0415524			6.76099e-05	0.0194439
6.18387e-05	0.0386188			6.18387e-05	0.0829259
8.75942e-05	0.153189			8.75942e-05	-0.0993825
8.69595e-05	0.200225			8.69595e-05	-0.130186
8.49584e-05	-0.0423884			8.49584e-05	-0.0325564
8.88624e-05	0.0184697			8.88624e-05	0.0116271
9.11693e-05	0.118775			9.11693e-05	0.0224831
9.22719e-05	0.056876			9.22719e-05	-0.0776178
9.40164e-05	-0.0154149			9.40164e-05	-0.0633754
9.49377e-05	0.19179			9.49377e-05	-0.110685
9.79288e-05	0.141212			9.79288e-05	-0.118112
0.000101512	0.0591019			0.000101512	0.051628
2.04844e-05	0.0261682			2.04844e-05	0.100277
1.43174e-05	0.0371155			1.43174e-05	0.105112
8.51326e-06	0.109921			8.51326e-06	-0.0257872
4.20588e-06	0.0579766			4.20588e-06	-0.12066
0				0
4.48642e-06	0.233362			4.48642e-06	-0.0689459
9.09953e-06	0.0270702			9.09953e-06	0.0550738
1.31321e-05	0.105571			1.31321e-05	-0.139944
1.67226e-05	0.205197			1.67226e-05	0.00173586
2.1712e-05	0.0452089			2.1712e-05	-0.00949592
2.43426e-05	0.099336			2.43426e-05	-0.0265505
3.06494e-05	0.144647			3.06494e-05	-0.00140189
3.41092e-05	0.168375			3.41092e-05	0.123347
3.94002e-05	-0.0472617			3.94002e-05	-0.00393117
4.25719e-05	-0.0167217			4.25719e-05	-0.09645
4.77803e-05	0.102377			4.77803e-05	0.066039
5.07911e-05	0.154129			5.07911e-05	0.0992408
1.38602e-05	0.146082			1.38602e-05	0.0329894
2.71221e-05	0.10188			2.71221e-05	0.024934
2.66455e-05	-0.100112			2.66455e-05	-0.0623345
2.63834e-05	-0.0977097			2.63834e-05	-0.0641817
2.9319e-05	0.114064			2.9319e-05	-0.0854507
3.38887e-05	0.0535243			3.38887e-05	0.0795705
3.92482e-05	0.0562072			3.92482e-05	-0.0280124
4.26465e-05	0.0650731			4.26465e-05	-0.0728543
4.57384e-05	0.037474			4.57384e-05	-0.00826613
4.98197e-05	0.106359			4.98197e-05	0.0124125
5.27335e-05	0.0663813			5.27335e-05	-0.148301
5.52019e-05	-0.0409278			5.52019e-05	-0.112443
5.27664e-05	-0.0640162			5.27664e-05	0.00118578
5.79198e-05	-0.107718			5.79198e-05	-0.0330735
5.98274e-05	-0.0996094			5.98274e-05	0.0197799
6.3895e-05	0.179591			6.3895e-05	0.00108109
6.81417e-05	0.106719			6.81417e-05	-0.0757267
7.22433e-05	0.145807			7.22433e-05	0.0186443
7.46905e-05	0.0826802			7.46905e-05	-0.0799628
7.34283e-05	0.073002			7.34283e-05	0.0573618
7.23169e-05	0.102889			7.23169e-05	0.0112567
7.26155e-05	0.0445339			7.26155e-05	-0.181625
7.32491e-05	0.0238051			7.32491e-05	-0.109947
7.5453e-05	0.0743107			7.5453e-05	0.0568743
7.82243e-05	0.102884			7.82243e-05	0.0417914
7.86176e-05	-0.03486			7.86176e-05	0.00254309
8.268e-05	-0.0201405			8.268e-05	-0.0104588
6.64724e-05	0.0382476			6.64724e-05	-0.0178791
6.49447e-05	0.0376154			6.49447e-05	-0.00565389
5.93289e-05	-0.165042			5.93289e-05	-0.0976402
8.41855e-05	-0.00962085			8.41855e-05	-0.00626434
8.34696e-05	0.0114588			8.34696e-05	0.00962275
8.12653e-05	0.116657			8.12653e-05	0.13104
8.51503e-05	0.115621			8.51503e-05	0.0774624
8.75049e-05	-0.00603075			8.75049e-05	-0.0252078
8.86644e-05	-0.0447354			8.86644e-05	0.00632671
9.05036e-05	0.0445855			9.05036e-05	0.00193624
9.1551e-05	0.133889			9.1551e-05	-0.0556106
9.46419e-05	-0.00704109			9.46419e-05	0.00980093
9.82604e-05	0.00987809			9.82604e-05	0.0562233
2.4791e-05	0.156743			2.4791e-05	0.0666839
1.88028e-05	0.0382439			1.88028e-05	-0.0133966
1.29981e-05	0.0788563			1.29981e-05	-0.107729
8.64908e-06	0.0230998			8.64908e-06	-0.0169377
4.48642e-06	0.233362			4.48642e-06	-0.108696
0				0
4.64748e-06	0.0475253			4.64748e-06	0.032572
9.24327e-06	0.161819			9.24327e-06	-0.0929103
1.29678e-05	0.225379			1.29678e-05	-0.0550665
1.79273e-05	0.025875			1.79273e-05	0.0448165
2.03496e-05	0.119882			2.03496e-05	0.0518448
2.6567e-05	0.0842306			2.6567e-05	0.0140701
3.00171e-05	0.0851853			3.00171e-05	-0.0552435
3.53151e-05	0.12674			3.53151e-05	0.10227
3.84559e-05	0.00362543			3.84559e-05	-0.0322126
4.35373e-05	0.136839			4.35373e-05	0.0352203
4.64625e-05	0.16877			4.64625e-05	-0.00761177
1.47802e-05	0.116866			1.47802e-05	-0.0584105
2.65277e-05	0.127934			2.65277e-05	-0.0939483
2.53461e-05	-0.0963215			2.53461e-05	-0.050867
2.41186e-05	-0.044507			2.41186e-05	-0.132164
2.65076e-05	0.0650568			2.65076e-05	-0.0183867
3.0984e-05	0.0185407			3.0984e-05	-0.0420202
3.63219e-05	0.0667296			3.63219e-05	-0.00112816
3.95605e-05	0.169577			3.95605e-05	-0.139286
4.25094e-05	-0.00795707			4.25094e-05	0.0490786
4.64192e-05	-0.0191025			4.64192e-05	0.058466
4.91653e-05	0.112			4.91653e-05	-0.0108218
5.13434e-05	-0.100097			5.13434e-05	0.0153344
4.88547e-05	-0.0124924			4.88547e-05	-0.0137393
5.39192e-05	-0.035301			5.39192e-05	-0.109646
5.56841e-05	0.0893815			5.56841e-05	0.0159828
5.96835e-05	0.0841777			5.96835e-05	0.0205862
6.38828e-05	0.126433			6.38828e-05	-0.105313
6.79567e-05	0.024359			6.79567e-05	-0.11555
7.04216e-05	0.11139			7.04216e-05	-0.111567
6.92577e-05	0.0627757			6.92577e-05	-0.0868072
6.82547e-05	0.0731647			6.82547e-05	-0.111358
6.86538e-05	0.0302841			6.86538e-05	-0.0212159
6.94412e-05	-0.0289514			6.94412e-05	-0.0686909
7.17408e-05	0.0935926			7.17408e-05	-0.00871657
7.46549e-05	0.0501251			7.46549e-05	-0.14443
7.48001e-05	0.179354			7.48001e-05	0.0353882
7.88872e-05	0.0158148			7.88872e-05	0.0488314
6.29585e-05	-0.044015			6.29585e-05	0.100112
6.16106e-05	0.105039			6.16106e-05	0.0438307
5.61618e-05	0.0383185			5.61618e-05	-0.0286688
8.01506e-05	-0.0575023			8.01506e-05	0.0255519
7.93684e-05	0.0626492			7.93684e-05	-0.155685
7.70072e-05	0.0794254			7.70072e-05	0.00685309
8.08769e-05	0.00452415			8.08769e-05	0.137961
8.32658e-05	-0.0187846			8.32658e-05	0.128328
8.44678e-05	0.0605485			8.44678e-05	0.02788
8.63805e-05	0.0436398			8.63805e-05	0.0848453
8.75301e-05	0.00759899			8.75301e-05	0.0180608
9.07032e-05	-0.0409404			9.07032e-05	0.106404
9.43494e-05	-0.110854			9.43494e-05	0.126694
2.94247e-05	-0.0165852			2.94247e-05	-0.128386
2.34056e-05	-0.170236			2.34056e-05	-0.123225
1.75808e-05	-0.0458504			1.75808e-05	0.058252
1.32876e-05	-0.0300856			1.32876e-05	0.04483
9.09953e-06	0.0270702			9.09953e-06	-0.00305666
4.64748e-06	0.0475253			4.64748e-06	0.117101
0				0
6.89678e-06	0.0747258			6.89678e-06	0.0346843
1.04616e-05	0.0790485			1.04616e-05	0.00495537
1.50807e-05	-0.021794			1.50807e-05	-0.0102554
1.70421e-05	-0.00658601			1.70421e-05	0.149517
2.29912e-05	-0.0410123			2.29912e-05	-0.0209969
2.63907e-05	-0.0505361			2.63907e-05	-0.137235
3.16641e-05	0.0297955			3.16641e-05	0.0281031
3.47353e-05	-0.187434			3.47353e-05	0.0828832
3.95738e-05	-0.144511			3.95738e-05	-0.0399667
4.23305e-05	-0.0305588			4.23305e-05	-0.0210438
1.75982e-05	-0.0349945			1.75982e-05	-0.0203931
2.74927e-05	0.0614571			2.74927e-05	-0.0532822
2.56012e-05	0.011723			2.56012e-05	-0.0674971
2.32807e-05	0.109893			2.32807e-05	0.0773684
2.48888e-05	0.204992			2.48888e-05	-0.0570077
2.91456e-05	-0.0703025			2.91456e-05	0.0723788
3.43756e-05	0.0853343			3.43756e-05	-0.0835671
3.7365e-05	0.0629349			3.7365e-05	0.152235
4.00944e-05	0.119071			4.00944e-05	-0.0500053
4.37411e-05	0.0700815			4.37411e-05	-0.0450879
4.62375e-05	0.091549			4.62375e-05	0.0220188
4.79836e-05	0.26853			4.79836e-05	-0.0109913
4.54228e-05	0.0668569			4.54228e-05	0.0659888
5.03338e-05	0.175432			5.03338e-05	-0.127243
5.18657e-05	-0.199098			5.18657e-05	-0.0157131
5.5744e-05	-0.0356954			5.5744e-05	0.0359578
5.9856e-05	0.0473271			5.9856e-05	-0.0218579
6.38767e-05	-0.0217116			6.38767e-05	-0.0145582
6.6371e-05	0.0352544			6.6371e-05	0.059683
6.53742e-05	-0.140679			6.53742e-05	0.034798
6.45452e-05	-0.016322			6.45452e-05	-0.175142
6.50971e-05	0.00505518			6.50971e-05	0.0561737
6.61087e-05	-0.00499508			6.61087e-05	-0.0160876
6.85397e-05	-0.0862938			6.85397e-05	-0.00102712
7.1645e-05	0.0286793			7.1645e-05	-0.00499121
7.14442e-05	-0.0609317			7.14442e-05	0.0539919
7.55602e-05	-0.01727			7.55602e-05	-0.0259173
6.00534e-05	-0.0366565			6.00534e-05	0.0186057
5.89527e-05	0.00835116			5.89527e-05	-0.0224544
5.37464e-05	-0.0301705			5.37464e-05	0.0680946
7.64679e-05	0.0939939			7.64679e-05	-0.0527643
7.55847e-05	0.0863038			7.55847e-05	-0.0837559
7.29698e-05	-0.0580806			7.29698e-05	0.0586521
7.68104e-05	-0.048903			7.68104e-05	0.136261
7.92563e-05	-0.0763063			7.92563e-05	0.0721778
8.05279e-05	0.17885			8.05279e-05	-0.0283978
8.25563e-05	0.175591			8.25563e-05	-0.0625203
8.38612e-05	0.0936984			8.38612e-05	-0.0285324
8.71525e-05	0.0878545			8.71525e-05	0.0351696
9.08355e-05	-0.203365			9.08355e-05	0.129666
3.14392e-05	-0.171693			3.14392e-05	0.0476129
2.67474e-05	0.0252668			2.67474e-05	-0.0395095
2.124e-05	0.075769			2.124e-05	0.0230348
1.67174e-05	0.0185562			1.67174e-05	0.122804
1.31321e-05	0.105571			1.31321e-05	0.0908792
9.24327e-06	0.161819			9.24327e-06	-0.0129635
6.89678e-06	0.0747258			6.89678e-06	0.0786192
0				0
3.74443e-06	0.142186			3.74443e-06	0.0218293
8.68403e-06	-0.00882685			8.68403e-06	0.0673308
1.12105e-05	0.0509762			1.12105e-05	0.0481131
1.75299e-05	-0.0663619			1.75299e-05	0.0672306
2.09899e-05	0.152841			2.09899e-05	-0.0154783
2.62754e-05	-0.0867748			2.62754e-05	0.0628158
2.94561e-05	-0.0318868			2.94561e-05	0.0132236
3.47655e-05	0.0163691			3.47655e-05	0.0578923
3.79288e-05	0.123513			3.79288e-05	0.0025446
1.51591e-05	0.0301471			1.51591e-05	0.150377
2.19087e-05	-0.0766059			2.19087e-05	-0.0236458
1.94445e-05	-0.151679			1.94445e-05	-0.0573219
1.65293e-05	0.000735046			1.65293e-05	-0.0872428
1.79928e-05	0.0746884			1.79928e-05	0.0103974
2.22762e-05	-0.0273741			2.22762e-05	-0.00267446
2.75357e-05	0.0116191			2.75357e-05	-0.0516043
3.06065e-05	0.164337			3.06065e-05	-0.130256
3.34374e-05	0.143701			3.34374e-05	-0.0795799
3.72442e-05	0.0281928			3.72442e-05	-0.0365963
3.99339e-05	0.118683			3.99339e-05	0.0772017
4.21321e-05	0.0904977			4.21321e-05	-0.00331877
3.96671e-05	0.0191666			3.96671e-05	-0.0104861
4.4792e-05	0.0658156			4.4792e-05	-0.0217096
4.67166e-05	-0.0910027			4.67166e-05	0.0405957
5.08293e-05	-0.0240247			5.08293e-05	0.0593992
5.51263e-05	0.0264803			5.51263e-05	0.0711503
5.92657e-05	0.053633			5.92657e-05	0.0275206
6.16844e-05	0.0596132			6.16844e-05	0.230828
6.03281e-05	-0.011697			6.03281e-05	-0.0306822
5.91849e-05	0.00623606			5.91849e-05	-0.00732978
5.94993e-05	0.0606231			5.94993e-05	-0.0206476
6.02162e-05	0.0796325			6.02162e-05	0.00183404
6.24995e-05	0.045678			6.24995e-05	0.0210793
6.54185e-05	0.050139			6.54185e-05	0.0409834
6.55784e-05	-0.0194624			6.55784e-05	-0.025039
6.96593e-05	0.0649603			6.96593e-05	0.0152106
5.37348e-05	0.0714182			5.37348e-05	-0.112433
5.24514e-05	-0.0240877			5.24514e-05	-0.0534722
4.71014e-05	0.0110247			4.71014e-05	-0.178583
7.10544e-05	-0.0280521			7.10544e-05	0.0272707
7.03416e-05	-0.0340322			7.03416e-05	-0.0589162
6.82415e-05	0.112903			6.82415e-05	-0.041686
7.2145e-05	0.0625284			7.2145e-05	0.00553216
7.44565e-05	0.0441102			7.44565e-05	0.019242
7.55778e-05	0.103538			7.55778e-05	-0.0277447
7.73803e-05	-0.00183043			7.73803e-05	0.0667563
7.84218e-05	0.00992725			7.84218e-05	0.0122287
8.15359e-05	0.134974			8.15359e-05	-0.00920833
8.5167e-05	0.012197			8.5167e-05	0.00406624
3.41978e-05	0.0543183			3.41978e-05	-0.00432531
2.99813e-05	-0.0124004			2.99813e-05	-0.0291995
2.46201e-05	-0.0105594			2.46201e-05	-0.103218
2.01213e-05	0.00453475			2.01213e-05	0.0375222
1.67226e-05	0.205197			1.67226e-05	-0.0937878
1.29678e-05	0.225379			1.29678e-05	-0.176671
1.04616e-05	0.0790485			1.04616e-05	-0.000241059
3.74443e-06	0.142186			3.74443e-06	-0.0689068
0				0
4.99154e-06	-0.0392483			4.99154e-06	-0.0509276
7.75525e-06	-0.0539795			7.75525e-06	0.0214137
1.41274e-05	-0.0744151			1.41274e-05	0.0280876
1.75711e-05	0.0157218			1.75711e-05	-0.078232
2.28194e-05	0.166864			2.28194e-05	-0.03922
2.60251e-05	0.104692			2.60251e-05	0.046303
3.14968e-05	0.0426142			3.14968e-05	0.0602916
3.48158e-05	0.135417			3.48158e-05	0.00864407
1.64234e-05	0.202965			1.64234e-05	0.0114631
2.04838e-05	0.111891			2.04838e-05	-0.00277645
1.74574e-05	-0.105432			1.74574e-05	0.060957
1.36833e-05	0.0179625			1.36833e-05	-0.0677898
1.4561e-05	0.0248789			1.4561e-05	-0.111848
1.87107e-05	0.00214893			1.87107e-05	-0.00100689
2.39171e-05	0.0350686			2.39171e-05	-0.119251
2.6919e-05	0.124174			2.6919e-05	-0.0999905
2.97121e-05	0.080663			2.97121e-05	-0.0677626
3.35001e-05	0.0994721			3.35001e-05	-0.0551499
3.61985e-05	0.0804454			3.61985e-05	0.0483287
3.84815e-05	0.123267			3.84815e-05	0.0651169
3.60452e-05	0.0522971			3.60452e-05	0.013574
4.12255e-05	0.000139067			4.12255e-05	0.0342578
4.3277e-05	0.0286391			4.3277e-05	0.0265083
4.74659e-05	0.108276			4.74659e-05	-0.0220274
5.18233e-05	0.0710603			5.18233e-05	-0.101892
5.59999e-05	0.0713462			5.59999e-05	0.0436422
5.83858e-05	0.111973			5.83858e-05	-0.0276647
5.69021e-05	-0.125168			5.69021e-05	-0.0119967
5.5657e-05	0.0466742			5.5657e-05	0.0361288
5.5901e-05	-0.0773299			5.5901e-05	-0.127513
5.65436e-05	0.0329036			5.65436e-05	-0.0676959
5.87964e-05	0.0659954			5.87964e-05	-0.146339
6.16871e-05	0.021194			6.16871e-05	-0.168307
6.19095e-05	0.0918818			6.19095e-05	-0.041944
6.59814e-05	0.0365423			6.59814e-05	0.0396591
4.99958e-05	0.080297			4.99958e-05	0.0135454
4.87081e-05	0.0307196			4.87081e-05	-0.0357187
4.33755e-05	0.0215659			4.33755e-05	-0.074929
6.75008e-05	0.0982729			6.75008e-05	-0.0295199
6.68404e-05	0.117313			6.68404e-05	0.0212783
6.49182e-05	0.0488202			6.49182e-05	0.00107087
6.884e-05	0.00431011			6.884e-05	0.0952247
7.11006e-05	0.0388858			7.11006e-05	0.138228
7.21686e-05	0.0855879			7.21686e-05	0.0146178
7.38953e-05	-0.0610126			7.38953e-05	-0.0200114
7.48565e-05	0.0708754			7.48565e-05	-0.00613407
7.7921e-05	0.0394415			7.7921e-05	0.0786555
8.15378e-05	0.048571			8.15378e-05	0.0298097
3.86852e-05	0.0558246			3.86852e-05	0.0137758
3.48112e-05	0.134838			3.48112e-05	0.00726988
2.95365e-05	-0.112242			2.95365e-05	0.0411749
2.5056e-05	0.00655744			2.5056e-05	0.0426816
2.1712e-05	0.0452089			2.1712e-05	-0.0346467
1.79273e-05	0.025875			1.79273e-05	-0.00961471
1.50807e-05	-0.021794			1.50807e-05	0.0326058
8.68403e-06	-0.00882685			8.68403e-06	-0.155991
4.99154e-06	-0.0392483			4.99154e-06	0.0157261
0				0
3.19899e-06	0.140026			3.19899e-06	0.0501626
9.3966e-06	0.142479			9.3966e-06	-0.104564
1.27798e-05	0.147136			1.27798e-05	-0.0431571
1.79612e-05	-0.0389897			1.79612e-05	0.0690322
2.11813e-05	-0.077039			2.11813e-05	0.0693567
2.68e-05	0.110052			2.68e-05	0.0375427
3.02763e-05	0.0715053			3.02763e-05	-0.0573415
1.9926e-05	0.0779804			1.9926e-05	-0.0802989
2.06591e-05	0.0783837			2.06591e-05	0.0413349
1.69263e-05	0.179271			1.69263e-05	0.188424
1.18238e-05	0.10048			1.18238e-05	0.0463952
1.11346e-05	0.0735587			1.11346e-05	0.0210738
1.47226e-05	0.0828371			1.47226e-05	0.0283849
1.96825e-05	0.222026			1.96825e-05	0.0345508
2.24217e-05	0.0383659			2.24217e-05	-0.0698389
2.50379e-05	0.147273			2.50379e-05	-0.00919801
2.867e-05	0.15518			2.867e-05	0.09848
3.12699e-05	0.148717			3.12699e-05	-0.0852277
3.34905e-05	0.0657369			3.34905e-05	-0.0727057
3.10605e-05	-0.00348776			3.10605e-05	-0.016039
3.62639e-05	-0.0676407			3.62639e-05	-0.0665966
3.84007e-05	0.0102714			3.84007e-05	-0.0106173
4.26497e-05	0.0205206			4.26497e-05	-0.0632557
4.70567e-05	0.207472			4.70567e-05	-0.0276131
5.12636e-05	0.0913362			5.12636e-05	-0.0866963
5.36178e-05	0.107198			5.36178e-05	-0.0473453
5.20284e-05	0.116221			5.20284e-05	0.0193803
5.07133e-05	0.0277158			5.07133e-05	0.0278221
5.09225e-05	0.0841528			5.09225e-05	-0.0920893
5.1553e-05	0.0605442			5.1553e-05	-0.0268095
5.38171e-05	0.188905			5.38171e-05	0.0476285
5.67445e-05	0.0779082			5.67445e-05	-0.0453219
5.69185e-05	0.130889			5.69185e-05	-0.0642659
6.09917e-05	0.0823646			6.09917e-05	-0.0432534
4.50792e-05	0.0106154			4.50792e-05	-0.0801245
4.3884e-05	0.228092			4.3884e-05	-0.0224916
3.86768e-05	0.0618321			3.86768e-05	0.00307965
6.25411e-05	0.124028			6.25411e-05	-0.0177386
6.19109e-05	0.0514845			6.19109e-05	-0.00537325
6.01244e-05	-0.00386477			6.01244e-05	-0.046139
6.40599e-05	0.153954			6.40599e-05	0.0058144
6.62766e-05	0.174496			6.62766e-05	0.0753893
6.73021e-05	0.205887			6.73021e-05	0.0371125
6.89748e-05	0.0880519			6.89748e-05	-0.0318957
6.98904e-05	-0.0565738			6.98904e-05	-0.0171013
7.2936e-05	0.0275952			7.2936e-05	0.101556
7.65493e-05	0.0294163			7.65493e-05	-0.0319828
4.17939e-05	-0.0702819			4.17939e-05	-0.0248091
3.77358e-05	0.069884			3.77358e-05	0.0471142
3.23612e-05	-0.0357454			3.23612e-05	0.0332653
2.78534e-05	0.126448			2.78534e-05	-0.0890865
2.43426e-05	0.099336			2.43426e-05	0.0945065
2.03496e-05	0.119882			2.03496e-05	-0.0543012
1.70421e-05	-0.00658601			1.70421e-05	0.0252555
1.12105e-05	0.0509762			1.12105e-05	-0.0814068
7.75525e-06	-0.0539795			7.75525e-06	0.0804293
3.19899e-06	0.140026			3.19899e-06	0.0342754
0				0
6.37219e-06	0.122673			6.37219e-06	0.103416
9.81824e-06	-0.0293735			9.81824e-06	0.016652
1.50817e-05	-0.0193821			1.50817e-05	-0.0111396
1.82788e-05	0.0123393			1.82788e-05	0.160261
2.37587e-05	0.0894017			2.37587e-05	-0.0356054
2.71557e-05	0.0165582			2.71557e-05	0.0542999
2.3124e-05	0.122392			2.3124e-05	-0.0454108
2.31173e-05	0.0138276			2.31173e-05	-0.00597703
1.91684e-05	0.0783088			1.91684e-05	-0.0139143
1.36001e-05	-0.0484646			1.36001e-05	0.0990244
1.17917e-05	0.12226			1.17917e-05	0.131849
1.45668e-05	-0.000650099			1.45668e-05	0.192633
1.90573e-05	-0.0697896			1.90573e-05	0.167307
2.13675e-05	0.032345			2.13675e-05	0.0042994
2.36508e-05	-0.138861			2.36508e-05	0.122219
2.69297e-05	0.0185973			2.69297e-05	0.0785887
2.92395e-05	0.0112261			2.92395e-05	-0.0816736
3.10156e-05	0.0248124			3.10156e-05	0.0698858
2.85077e-05	0.00869214			2.85077e-05	0.0276745
3.35876e-05	-0.129982			3.35876e-05	-0.0934609
3.55371e-05	0.0660711			3.55371e-05	0.0109674
3.9711e-05	0.0177001			3.9711e-05	-0.106803
4.40714e-05	0.0801006			4.40714e-05	0.00319155
4.82546e-05	-0.0315094			4.82546e-05	0.0687459
5.0634e-05	-0.0508487			5.0634e-05	0.034576
4.91588e-05	0.0692736			4.91588e-05	0.105702
4.79746e-05	-0.10139			4.79746e-05	0.0151907
4.83088e-05	0.0114367			4.83088e-05	-0.0344945
4.91313e-05	0.00819025			4.91313e-05	0.00594811
5.15117e-05	0.0267614			5.15117e-05	0.029426
5.46075e-05	0.0589552			5.46075e-05	0.0578725
5.44816e-05	0.101544			5.44816e-05	0.0147426
5.85822e-05	0.0446876			5.85822e-05	0.0662367
4.3047e-05	-0.0613849			4.3047e-05	0.200267
4.20925e-05	0.0880672			4.20925e-05	-0.0361375
3.71519e-05	0.0973443			3.71519e-05	0.0314859
5.9845e-05	0.0100689			5.9845e-05	0.00690705
5.91361e-05	-0.0470176			5.91361e-05	-0.0596645
5.71636e-05	-0.021014			5.71636e-05	-0.029912
6.10869e-05	0.0370335			6.10869e-05	0.109089
6.33457e-05	0.118149			6.33457e-05	0.0390713
6.44214e-05	-0.00551159			6.44214e-05	0.0509637
6.61804e-05	0.0298203			6.61804e-05	0.0684049
6.72144e-05	0.0866986			6.72144e-05	0.0505348
7.0355e-05	-0.00407378			7.0355e-05	0.115844
7.39999e-05	-0.0264018			7.39999e-05	0.0765558
4.80797e-05	0.0730444			4.80797e-05	0.0244327
4.41079e-05	0.0863781			4.41079e-05	0.0965526
3.87241e-05	-0.0534334			3.87241e-05	-0.0338557
3.42122e-05	-0.0958547			3.42122e-05	-0.0909053
3.06494e-05	0.144647			3.06494e-05	0.0594206
2.6567e-05	0.0842306			2.6567e-05	-0.0377932
2.29912e-05	-0.0410123			2.29912e-05	0.152363
1.75299e-05	-0.0663619			1.75299e-05	-0.027139
1.41274e-05	-0.0744151			1.41274e-05	-0.0737319
9.3966e-06	0.142479			9.3966e-06	0.0371373
6.37219e-06	0.122673			6.37219e-06	-0.0225417
0				0
3.46012e-06	0.173288			3.46012e-06	0.0933015
8.75312e-06	-0.0262172			8.75312e-06	0.0216808
1.19263e-05	-0.0326224			1.19263e-05	-0.0667272
1.7408e-05	0.0405462			1.7408e-05	-0.0175899
2.09051e-05	0.0602656			2.09051e-05	-0.00497668
2.90389e-05	-0.00606894			2.90389e-05	-0.161352
2.68406e-05	0.0243028			2.68406e-05	-0.0723749
2.25911e-05	0.0713507			2.25911e-05	-0.00255998
1.65585e-05	-0.073367			1.65585e-05	-0.0153018
1.30407e-05	0.0815263			1.30407e-05	0.125345
1.3785e-05	0.120574			1.3785e-05	-0.0325671
1.68209e-05	-0.00803015			1.68209e-05	-0.0701901
1.81022e-05	-0.0690903			1.81022e-05	-0.0865789
1.96204e-05	-0.114671			1.96204e-05	0.0186704
2.21424e-05	-0.0490557			2.21424e-05	-0.0251785
2.39159e-05	0.111554			2.39159e-05	-0.0446125
2.50286e-05	-0.0748647			2.50286e-05	-0.0628525
2.24398e-05	-0.0229545			2.24398e-05	-0.0623509
2.7371e-05	-0.0261533			2.7371e-05	-0.0265185
2.91872e-05	0.104742			2.91872e-05	-0.0861083
3.33398e-05	0.0340406			3.33398e-05	-0.0477486
3.77016e-05	0.214942			3.77016e-05	0.0550218
4.1891e-05	-0.093037			4.1891e-05	-0.00334537
4.42642e-05	-0.00442813			4.42642e-05	-0.0459102
4.28027e-05	0.194813			4.28027e-05	-0.0193887
4.16896e-05	0.0573242			4.16896e-05	-0.0699728
4.21255e-05	0.0774593			4.21255e-05	-0.00285878
4.31461e-05	0.0351377			4.31461e-05	-0.00528471
4.56593e-05	0.0820085			4.56593e-05	-0.015515
4.89637e-05	-0.00447551			4.89637e-05	0.0881223
4.84694e-05	-0.00466349			4.84694e-05	-0.05898
5.25941e-05	-0.101438			5.25941e-05	-0.064868
3.75968e-05	0.0236349			3.75968e-05	0.0617314
3.70156e-05	0.0269828			3.70156e-05	-0.0551811
3.25644e-05	-0.00766118			3.25644e-05	0.0373712
5.35838e-05	-0.0462362			5.35838e-05	0.122847
5.28227e-05	-0.0814057			5.28227e-05	-0.0073167
5.07915e-05	-0.0866552			5.07915e-05	0.0776659
5.47158e-05	-0.00742137			5.47158e-05	0.076798
5.69745e-05	-0.0228913			5.69745e-05	-0.0576644
5.80598e-05	0.0363208			5.80598e-05	0.15828
5.98542e-05	0.00387187			5.98542e-05	0.0495136
6.09648e-05	-0.01488			6.09648e-05	0.0655599
6.41825e-05	-0.0626546			6.41825e-05	0.0876406
6.7854e-05	0.0215053			6.7854e-05	-0.140669
5.14265e-05	0.117402			5.14265e-05	0.169729
4.7546e-05	0.277186			4.7546e-05	-0.0210626
4.2178e-05	-0.0253621			4.2178e-05	-0.00678552
3.76678e-05	-0.0359758			3.76678e-05	-0.127666
3.41092e-05	0.168375			3.41092e-05	0.0396938
3.00171e-05	0.0851853			3.00171e-05	-0.038457
2.63907e-05	-0.0505361			2.63907e-05	0.0653787
2.09899e-05	0.152841			2.09899e-05	-0.218798
1.75711e-05	0.0157218			1.75711e-05	0.0125812
1.27798e-05	0.147136			1.27798e-05	0.111882
9.81824e-06	-0.0293736			9.81824e-06	-0.0383554
3.46012e-06	0.173288			3.46012e-06	0.0146448
0				0
5.298e-06	0.0967052			5.298e-06	0.0958632
8.46671e-06	-0.061709			8.46671e-06	0.00944954
1.40406e-05	0.116523			1.40406e-05	-0.00498071
1.76746e-05	0.210671			1.76746e-05	0.07265
3.21897e-05	-0.0213004			3.21897e-05	0.0368677
2.89674e-05	0.142121			2.89674e-05	0.109374
2.46555e-05	0.0626305			2.46555e-05	0.123559
1.8604e-05	-0.0316365			1.8604e-05	-0.0241803
1.45455e-05	0.155447			1.45455e-05	0.107241
1.41893e-05	0.0960277			1.41893e-05	0.00423169
1.61474e-05	0.0275649			1.61474e-05	0.0165825
1.6706e-05	-0.110039			1.6706e-05	0.0411252
1.7661e-05	0.000261731			1.7661e-05	-0.016581
1.9621e-05	0.0778194			1.9621e-05	-0.0312987
2.10223e-05	0.0310781			2.10223e-05	0.0516767
2.17228e-05	-0.112694			2.17228e-05	-0.0143995
1.90956e-05	-0.159137			1.90956e-05	-0.0896677
2.39461e-05	0.0110659			2.39461e-05	-0.0548578
2.57279e-05	0.0322613			2.57279e-05	-0.0586267
2.98963e-05	-0.00710847			2.98963e-05	0.0635609
3.42797e-05	0.0530396			3.42797e-05	0.0351945
3.84837e-05	0.0193927			3.84837e-05	-0.119172
4.08416e-05	-0.10016			4.08416e-05	-0.0730084
3.9345e-05	0.0703068			3.9345e-05	-0.0712312
3.82376e-05	0.148168			3.82376e-05	0.0514777
3.87075e-05	0.0800506			3.87075e-05	-0.0518903
3.98148e-05	0.0178672			3.98148e-05	-0.0396089
4.23904e-05	0.182428			4.23904e-05	0.0891724
4.57968e-05	0.0777268			4.57968e-05	0.0833641
4.5122e-05	-0.0467841			4.5122e-05	0.151463
4.92555e-05	0.0167399			4.92555e-05	-0.185789
3.45561e-05	0.0900038			3.45561e-05	-0.0274876
3.41889e-05	0.00556395			3.41889e-05	0.0648952
3.00517e-05	0.0312265			3.00517e-05	0.0508106
5.01372e-05	0.00382278			5.01372e-05	-0.0510928
4.93644e-05	-0.000511579			4.93644e-05	-0.0621094
4.73581e-05	0.121605			4.73581e-05	-0.0780536
5.1288e-05	-0.033188			5.1288e-05	0.0991124
5.35306e-05	-0.00154888			5.35306e-05	0.0152992
5.46045e-05	0.119014			5.46045e-05	0.0669957
5.63944e-05	-0.0610573			5.63944e-05	0.0752402
5.7521e-05	-0.138563			5.7521e-05	0.0324266
6.0764e-05	-0.0453172			6.0764e-05	0.0199496
6.44448e-05	0.0535068			6.44448e-05	-0.09494
5.64845e-05	0.162168			5.64845e-05	0.0728933
5.27686e-05	0.0498225			5.27686e-05	-0.0307464
4.74382e-05	0.00797466			4.74382e-05	0.00998493
4.29337e-05	0.106889			4.29337e-05	0.0183373
3.94002e-05	-0.0472617			3.94002e-05	-0.148005
3.53151e-05	0.12674			3.53151e-05	-0.11409
3.16641e-05	0.0297955			3.16641e-05	-0.0234307
2.62754e-05	-0.0867748			2.62754e-05	-0.168402
2.28194e-05	0.166864			2.28194e-05	-0.105832
1.79612e-05	-0.0389897			1.79612e-05	0.0788111
1.50817e-05	-0.0193821			1.50817e-05	-0.00508118
8.75312e-06	-0.0262172			8.75312e-06	-0.0149614
5.298e-06	0.0967052			5.298e-06	-0.0734941
0				0
3.22505e-06	0.245671			3.22505e-06	0.16982
9.18505e-06	0.159687			9.18505e-06	0.116659
1.31684e-05	0.0787839			1.31684e-05	0.0346614
3.69861e-05	0.125605			3.69861e-05	-0.102319
3.24143e-05	-0.0078073			3.24143e-05	0.0135911
2.80962e-05	0.0194616			2.80962e-05	0.13579
2.2181e-05	0.102607			2.2181e-05	0.0663549
1.76724e-05	0.104583			1.76724e-05	0.0668702
1.59649e-05	0.0588262			1.59649e-05	0.0551727
1.61679e-05	-0.112718			1.61679e-05	0.0262425
1.54792e-05	-0.024686			1.54792e-05	0.0733607
1.53454e-05	-0.0230635			1.53454e-05	0.0608603
1.61261e-05	-0.0375484			1.61261e-05	-0.0283458
1.67534e-05	-0.0786121			1.67534e-05	-0.0705542
1.6647e-05	-0.209499			1.6647e-05	0.0274919
1.39619e-05	-0.20254			1.39619e-05	-0.0271002
1.86719e-05	-0.0582906			1.86719e-05	-0.0120387
2.04577e-05	0.145707			2.04577e-05	0.128946
2.46942e-05	0.117128			2.46942e-05	0.001971
2.91396e-05	0.0793327			2.91396e-05	0.137001
3.3379e-05	-0.0523681			3.3379e-05	0.0647408
3.56934e-05	-0.0056421			3.56934e-05	-0.0611976
3.40829e-05	0.0598668			3.40829e-05	3.70731e-05
3.29396e-05	-0.0152145			3.29396e-05	-0.0347952
3.34364e-05	-0.0589067			3.34364e-05	-0.00569548
3.46587e-05	-0.0313062			3.46587e-05	-0.00871283
3.73243e-05	0.0215162			3.73243e-05	-0.101143
4.08819e-05	-0.0563485			4.08819e-05	-0.140559
3.99392e-05	0.0581428			3.99392e-05	0.109
4.40825e-05	-0.00279702			4.40825e-05	-0.0115126
2.9879e-05	0.0390021			2.9879e-05	0.112339
2.98795e-05	-0.104719			2.98795e-05	0.0889966
2.63323e-05	0.0887648			2.63323e-05	0.204542
4.48407e-05	0.137369			4.48407e-05	0.0769026
4.40701e-05	0.0933213			4.40701e-05	-0.102987
4.21764e-05	0.0359872			4.21764e-05	0.0243901
4.61202e-05	-0.0448665			4.61202e-05	-0.00243752
4.83162e-05	0.216403			4.83162e-05	0.0955676
4.93514e-05	0.0895526			4.93514e-05	0.0597513
5.11049e-05	0.00990217			5.11049e-05	0.129084
5.22258e-05	-0.121166			5.22258e-05	-0.131074
5.54897e-05	0.0233154			5.54897e-05	0.00914134
5.91799e-05	-0.00179952			5.91799e-05	-0.0446937
5.97056e-05	-0.0301131			5.97056e-05	0.00589159
5.59846e-05	-0.0754678			5.59846e-05	0.0716799
5.06398e-05	0.0348262			5.06398e-05	-0.00417468
4.61318e-05	0.133925			4.61318e-05	0.0656659
4.25719e-05	-0.0167217			4.25719e-05	-0.0305384
3.84559e-05	0.00362544			3.84559e-05	-0.0365397
3.47353e-05	-0.187434			3.47353e-05	-0.0266515
2.94561e-05	-0.0318868			2.94561e-05	-0.0370654
2.60251e-05	0.104692			2.60251e-05	-0.107203
2.11813e-05	-0.0770389			2.11813e-05	-0.0975977
1.82788e-05	0.0123393			1.82788e-05	-0.0325013
1.19263e-05	-0.0326224			1.19263e-05	0.0186076
8.46671e-06	-0.061709			8.46671e-06	0.0583772
3.22505e-06	0.245671			3.22505e-06	0.0134176
0				0
6.14746e-06	0.226881			6.14746e-06	-0.0432011
1.0299e-05	0.134732			1.0299e-05	-0.0885496
4.01684e-05	-0.00784758			4.01684e-05	-0.0437045
3.51864e-05	-0.0647631			3.51864e-05	0.0283799
3.08877e-05	0.00857609			3.08877e-05	0.0394
2.50586e-05	0.179319			2.50586e-05	0.00073139
2.04543e-05	0.0548675			2.04543e-05	0.0981836
1.82966e-05	0.109641			1.82966e-05	0.0165371
1.76908e-05	-0.0972259			1.76908e-05	-0.18276
1.63297e-05	0.137996			1.63297e-05	-0.298491
1.54752e-05	0.0489346			1.54752e-05	0.050634
1.52735e-05	-0.0190827			1.52735e-05	-0.151355
1.51347e-05	-0.0324974			1.51347e-05	-0.0557779
1.40411e-05	-0.100865			1.40411e-05	-0.0180046
1.12979e-05	-0.0303587			1.12979e-05	0.00223962
1.56745e-05	-0.00166462			1.56745e-05	-0.0552253
1.72612e-05	0.188283			1.72612e-05	0.0959007
2.14705e-05	0.0589596			2.14705e-05	-0.102308
2.5916e-05	0.120083			2.5916e-05	0.00744143
3.01592e-05	0.239494			3.01592e-05	-0.0265617
3.24689e-05	0.0361834			3.24689e-05	0.0384556
3.08802e-05	0.0340163			3.08802e-05	-0.0452094
2.9817e-05	0.0858909			2.9817e-05	-0.0189636
3.04221e-05	0.0515056			3.04221e-05	-0.0771746
3.18431e-05	0.148069			3.18431e-05	0.0264575
3.46237e-05	0.0876571			3.46237e-05	-0.137712
3.83505e-05	0.0801143			3.83505e-05	-0.0999042
3.70763e-05	0.174129			3.70763e-05	-0.0903333
4.12292e-05	0.131638			4.12292e-05	-0.0494438
2.76462e-05	0.056978			2.76462e-05	-0.0206321
2.80103e-05	0.0639948			2.80103e-05	-0.164125
2.50323e-05	0.127661			2.50323e-05	-0.094764
4.17342e-05	0.0734246			4.17342e-05	-0.0489939
4.09129e-05	-0.00810754			4.09129e-05	-0.147676
3.89517e-05	0.145525			3.89517e-05	-0.0889912
4.28952e-05	0.120431			4.28952e-05	-0.198921
4.50954e-05	0.162609			4.50954e-05	-0.145035
4.61436e-05	0.119537			4.61436e-05	-0.0344766
4.79341e-05	0.102998			4.79341e-05	-0.0102283
4.91263e-05	0.0343962			4.91263e-05	-0.142933
5.24561e-05	0.0250174			5.24561e-05	-0.0418631
5.6166e-05	0.111897			5.6166e-05	-0.117197
6.54665e-05	0.0200723			6.54665e-05	0.109665
6.14647e-05	0.129423			6.14647e-05	0.0161662
5.60055e-05	-0.0122835			5.60055e-05	0.0351124
5.14825e-05	-0.0297379			5.14825e-05	0.0191253
4.77803e-05	0.102377			4.77803e-05	-0.0906874
4.35373e-05	0.136839			4.35373e-05	-0.0676005
3.95738e-05	-0.144511			3.95738e-05	0.0345968
3.47655e-05	0.0163691			3.47655e-05	-0.197617
3.14968e-05	0.0426142			3.14968e-05	-0.110594
2.68e-05	0.110052			2.68e-05	0.0227263
2.37587e-05	0.0894017			2.37587e-05	-0.0197826
1.7408e-05	0.0405462			1.7408e-05	0.0649151
1.40406e-05	0.116523			1.40406e-05	-0.00933374
9.18505e-06	0.159687			9.18505e-06	0.0513108
6.14746e-06	0.226881			6.14746e-06	-0.119321
0				0
4.25842e-06	0.311472			4.25842e-06	0.00108765
4.61285e-05	0.1117			4.61285e-05	0.0147015
4.13124e-05	0.0947237			4.13124e-05	0.0238867
3.70204e-05	-0.0546951			3.70204e-05	0.104982
3.12054e-05	0.0388555			3.12054e-05	-0.113668
2.65911e-05	0.0563313			2.65911e-05	-0.0773397
2.42672e-05	0.165678			2.42672e-05	-0.017837
2.30936e-05	-0.0475313			2.30936e-05	-0.0316107
2.11292e-05	-0.077354			2.11292e-05	-0.131251
1.94789e-05	0.0627754			1.94789e-05	-0.0554926
1.78451e-05	0.00825064			1.78451e-05	-0.0312301
1.62563e-05	0.00822612			1.62563e-05	-0.0485338
1.26189e-05	-0.129753			1.26189e-05	-0.0725476
1.01023e-05	-0.12202			1.01023e-05	-0.116445
1.24223e-05	0.081361			1.24223e-05	0.0272052
1.25186e-05	0.115864			1.25186e-05	0.00499047
1.61704e-05	0.147325			1.61704e-05	-0.220778
2.03642e-05	0.0717471			2.03642e-05	0.100504
2.45071e-05	0.243576			2.45071e-05	-0.0647223
2.69196e-05	0.061626			2.69196e-05	-0.135746
2.58234e-05	0.0955914			2.58234e-05	0.0282565
2.53694e-05	0.0576714			2.53694e-05	0.0449282
2.65281e-05	-0.0457916			2.65281e-05	-0.050507
2.87368e-05	-0.00808367			2.87368e-05	-0.059137
3.18704e-05	0.0456694			3.18704e-05	-0.0961862
3.60746e-05	0.0759744			3.60746e-05	-0.112199
3.37092e-05	0.10889			3.37092e-05	-0.151329
3.78481e-05	0.174694			3.78481e-05	-0.241972
2.64802e-05	0.0102825			2.64802e-05	0.00638654
2.77651e-05	-0.0940037			2.77651e-05	-0.0318085
2.61632e-05	-0.0275301			2.61632e-05	0.0694497
3.72625e-05	0.0518765			3.72625e-05	0.0643317
3.61496e-05	0.036374			3.61496e-05	0.038681
3.34858e-05	0.102425			3.34858e-05	-0.160627
3.73806e-05	0.0985774			3.73806e-05	-0.140428
3.97296e-05	0.226977			3.97296e-05	0.0255922
4.09552e-05	0.0632568			4.09552e-05	-0.00135834
4.30459e-05	0.0244577			4.30459e-05	-0.00457778
4.46483e-05	0.00458956			4.46483e-05	-0.0782889
4.82731e-05	-0.0138614			4.82731e-05	0.145935
5.20507e-05	0.0924261			5.20507e-05	-0.154301
6.89494e-05	-0.00232257			6.89494e-05	-0.0339874
6.46763e-05	0.135738			6.46763e-05	-0.00573456
5.91254e-05	0.0439162			5.91254e-05	0.12043
5.46024e-05	0.0558164			5.46024e-05	0.0310827
5.07911e-05	0.154129			5.07911e-05	-0.145914
4.64625e-05	0.16877			4.64625e-05	-0.00905191
4.23305e-05	-0.0305588			4.23305e-05	0.0475398
3.79288e-05	0.123513			3.79288e-05	-0.102122
3.48158e-05	0.135417			3.48158e-05	0.0424009
3.02763e-05	0.0715053			3.02763e-05	-0.0812207
2.71557e-05	0.0165582			2.71557e-05	0.0404751
2.09051e-05	0.0602656			2.09051e-05	0.0346333
1.76746e-05	0.210671			1.76746e-05	-0.0795091
1.31684e-05	0.0787839			1.31684e-05	0.0586591
1.0299e-05	0.134732			1.0299e-05	0.0103481
4.25842e-06	0.311472			4.25842e-06	0.103183
0				0
4.98643e-05	0.171389			4.98643e-05	-0.0567582
4.54821e-05	0.190447			4.54821e-05	0.127417
4.11794e-05	-0.0654242			4.11794e-05	0.00339131
3.53191e-05	0.0652119			3.53191e-05	-0.0969655
3.0744e-05	0.107692			3.0744e-05	0.0024281
2.8513e-05	0.107856			2.8513e-05	-0.0411462
2.7318e-05	0.00565383			2.7318e-05	-0.21549
2.52429e-05	0.0433944			2.52429e-05	-0.117197
2.33979e-05	0.0121115			2.33979e-05	-0.0778069
2.13158e-05	0.0665864			2.13158e-05	-0.124458
1.91808e-05	0.115262			1.91808e-05	-0.0862702
1.44292e-05	0.0145556			1.44292e-05	-0.0682521
1.23659e-05	-0.0839541			1.23659e-05	-0.110968
1.28604e-05	0.033574			1.28604e-05	-0.0135787
1.13548e-05	0.0757434			1.13548e-05	0.077187
1.39775e-05	0.114491			1.39775e-05	0.0315252
1.76514e-05	0.129073			1.76514e-05	0.0285336
2.15634e-05	0.243425			2.15634e-05	0.0515695
2.40905e-05	0.130188			2.40905e-05	0.103227
2.3645e-05	0.0302679			2.3645e-05	0.00310498
2.38818e-05	0.146124			2.38818e-05	-0.0898587
2.55633e-05	0.0610913			2.55633e-05	-0.123841
2.84229e-05	-0.0459508			2.84229e-05	-0.0962219
3.17801e-05	0.173111			3.17801e-05	-0.105704
3.62848e-05	0.00756117			3.62848e-05	0.0454528
3.30705e-05	0.146629			3.30705e-05	0.0210163
3.71342e-05	-0.00107369			3.71342e-05	-0.30073
2.76984e-05	0.0773609			2.76984e-05	-0.0448506
2.95445e-05	0.00386643			2.95445e-05	-0.0972971
2.87631e-05	0.0806798			2.87631e-05	0.0813668
3.55461e-05	0.0332194			3.55461e-05	0.0709258
3.41459e-05	0.123668			3.41459e-05	-0.0378607
3.06965e-05	0.101314			3.06965e-05	-0.163336
3.44985e-05	0.206965			3.44985e-05	-0.149473
3.70168e-05	0.227778			3.70168e-05	0.0517311
3.84421e-05	0.0374673			3.84421e-05	-0.066219
4.08476e-05	0.0681755			4.08476e-05	-0.00933755
4.28557e-05	0.0890136			4.28557e-05	0.0463726
4.67353e-05	0.138735			4.67353e-05	0.0749212
5.05502e-05	0.1242			5.05502e-05	-0.0807161
2.02457e-05	0.0817829			2.02457e-05	0.00926381
1.91714e-05	0.022166			1.91714e-05	-0.0608513
1.61369e-05	0.0332667			1.61369e-05	0.0317535
1.34531e-05	0.10128			1.34531e-05	0.0140849
1.38602e-05	0.146082			1.38602e-05	-0.0246446
1.47802e-05	0.116866			1.47802e-05	-0.00513314
1.75982e-05	-0.0349945			1.75982e-05	0.114308
1.51591e-05	0.0301471			1.51591e-05	-0.0451215
1.64234e-05	0.202965			1.64234e-05	0.0767853
1.9926e-05	0.0779805			1.9926e-05	-0.0714245
2.3124e-05	0.122392			2.3124e-05	0.0206331
2.90389e-05	-0.00606894			2.90389e-05	-0.0432495
3.21897e-05	-0.0213004			3.21897e-05	-0.174405
3.69861e-05	0.125605			3.69861e-05	0.0701372
4.01684e-05	-0.00784759			4.01684e-05	0.090111
4.61285e-05	0.1117			4.61285e-05	0.0603442
4.98643e-05	0.171389			4.98643e-05	-0.00859143
0				0
1.42202e-05	0.142015			1.42202e-05	-0.13006
1.51443e-05	-0.00822922			1.51443e-05	0.0277962
1.75469e-05	0.0252234			1.75469e-05	0.140201
2.18812e-05	-0.0161953			2.18812e-05	0.0385296
2.62683e-05	0.00587943			2.62683e-05	-0.0195566
3.12771e-05	-0.0112103			3.12771e-05	-0.0307969
3.50484e-05	0.0374777			3.50484e-05	-0.0491187
3.85259e-05	0.0492847			3.85259e-05	-0.0877607
4.3125e-05	-0.027115			4.3125e-05	-0.00605632
4.66691e-05	-0.00147664			4.66691e-05	0.0600378
5.05382e-05	0.0907292			5.05382e-05	-0.0571127
4.85052e-05	0.0414306			4.85052e-05	-0.0795606
5.40271e-05	-0.0674083			5.40271e-05	0.0404722
5.68832e-05	-0.0432467			5.68832e-05	0.0863582
6.13922e-05	0.126628			6.13922e-05	-0.037031
6.5963e-05	0.0458617			6.5963e-05	0.0255903
7.02477e-05	0.0399161			7.02477e-05	0.110294
7.24702e-05	-0.00136691			7.24702e-05	0.0887061
7.0365e-05	0.0351273			7.0365e-05	0.0823149
6.84661e-05	0.155402			6.84661e-05	0.0271102
6.80989e-05	-0.0101515			6.80989e-05	-0.182992
6.78281e-05	-0.0132489			6.78281e-05	-0.0615685
6.94917e-05	0.019428			6.94917e-05	-0.0540074
7.15339e-05	-0.0575629			7.15339e-05	-0.0334876
7.31526e-05	0.0646895			7.31526e-05	-0.0363028
7.70174e-05	0.0449594			7.70174e-05	-0.016998
5.97563e-05	0.0206118			5.97563e-05	-0.0574194
5.7504e-05	-0.0132547			5.7504e-05	-0.0270595
5.13829e-05	0.0319299			5.13829e-05	-0.0422464
7.99417e-05	0.0768847			7.99417e-05	-0.00770317
7.97001e-05	0.164245			7.97001e-05	0.0511457
7.88271e-05	-0.0376664			7.88271e-05	-0.0377499
8.28004e-05	-0.0184217			8.28004e-05	0.0840655
8.47966e-05	0.116811			8.47966e-05	0.0943768
8.55667e-05	0.0119612			8.55667e-05	-0.0711401
8.6798e-05	-0.022415			8.6798e-05	-0.0931116
8.71137e-05	0.0426213			8.71137e-05	0.0405407
8.96491e-05	0.0318847			8.96491e-05	0.0891255
9.30626e-05	-0.0093324			9.30626e-05	-0.0570974
3.23511e-05	0.0549741			3.23511e-05	0.0609122
3.29846e-05	0.0690265			3.29846e-05	0.172446
3.03533e-05	0.07458			3.03533e-05	-0.0321615
2.75118e-05	0.0780404			2.75118e-05	-0.0052719
2.71221e-05	0.10188			2.71221e-05	-0.0448897
2.65277e-05	0.127934			2.65277e-05	0.0458036
2.74927e-05	0.061457			2.74927e-05	-0.0757169
2.19087e-05	-0.0766059			2.19087e-05	-0.0705878
2.04838e-05	0.111891			2.04838e-05	0.0360639
2.06591e-05	0.0783837			2.06591e-05	-0.0451863
2.31173e-05	0.0138276			2.31173e-05	0.0398339
2.68406e-05	0.0243028			2.68406e-05	-0.00869808
2.89674e-05	0.142121			2.89674e-05	0.0713941
3.24143e-05	-0.00780731			3.24143e-05	0.170479
3.51864e-05	-0.0647631			3.51864e-05	0.0342204
4.13124e-05	0.0947237			4.13124e-05	0.0306394
4.54821e-05	0.190447			4.54821e-05	0.0279615
1.42202e-05	0.142015			1.42202e-05	0.00218702
0				0
4.32608e-06	0.0226454			4.32608e-06	0.0772633
1.03635e-05	-0.0291362			1.03635e-05	0.0107797
1.47455e-05	0.0383919			1.47455e-05	0.055798
1.75426e-05	0.161919			1.75426e-05	-0.0840054
2.11948e-05	0.0946264			2.11948e-05	-0.103431
2.4938e-05	0.00750597			2.4938e-05	0.0258517
2.84991e-05	0.0823409			2.84991e-05	-0.0575919
3.32757e-05	0.0520835			3.32757e-05	-0.0151863
3.72236e-05	0.195395			3.72236e-05	0.0320554
4.22671e-05	0.157557			4.22671e-05	-0.150104
4.07803e-05	0.0860914			4.07803e-05	-0.113985
4.63257e-05	0.00783433			4.63257e-05	-0.0711748
4.99755e-05	-0.061095			4.99755e-05	0.0250403
5.4698e-05	0.0812832			5.4698e-05	0.0615793
5.93895e-05	0.119225			5.93895e-05	-0.0659683
6.36901e-05	0.0126143			6.36901e-05	-0.101319
6.56165e-05	0.185532			6.56165e-05	-0.037071
6.27663e-05	-0.0436571			6.27663e-05	0.0615794
6.0177e-05	0.131037			6.0177e-05	0.0659153
5.91926e-05	0.120046			5.91926e-05	-0.146952
5.80926e-05	-0.0519204			5.80926e-05	-0.0957946
5.9225e-05	0.166924			5.9225e-05	-0.0183514
6.05863e-05	-0.0085543			6.05863e-05	-0.00227048
6.32384e-05	0.200648			6.32384e-05	-0.074398
6.68431e-05	-0.0530418			6.68431e-05	-0.11
4.90883e-05	0.0110779			4.90883e-05	-0.0177749
4.62589e-05	0.0537796			4.62589e-05	-0.0912262
3.98901e-05	0.0814917			3.98901e-05	0.121966
7.09719e-05	0.0535713			7.09719e-05	-0.0235919
7.11713e-05	0.0967563			7.11713e-05	-0.0359309
7.15728e-05	-0.138558			7.15728e-05	-0.0830767
7.55277e-05	-0.0734255			7.55277e-05	-0.0157559
7.71383e-05	0.0176128			7.71383e-05	0.062382
7.75277e-05	0.0297967			7.75277e-05	-0.170946
7.8174e-05	0.0487819			7.8174e-05	-0.197619
7.78246e-05	0.176149			7.78246e-05	-0.0845347
7.98288e-05	0.0285407			7.98288e-05	-0.0045398
8.30147e-05	0.0350978			8.30147e-05	-0.105075
3.46042e-05	0.0763959			3.46042e-05	-0.0818773
3.43126e-05	0.143693			3.43126e-05	0.108407
3.10228e-05	0.010694			3.10228e-05	-0.100807
2.76929e-05	0.108084			2.76929e-05	0.0500848
2.66455e-05	-0.100112			2.66455e-05	-0.128648
2.53461e-05	-0.0963215			2.53461e-05	-0.0452495
2.56012e-05	0.011723			2.56012e-05	-0.0575854
1.94445e-05	-0.151679			1.94445e-05	0.0625912
1.74574e-05	-0.105432			1.74574e-05	-0.0712276
1.69263e-05	0.179271			1.69263e-05	0.13841
1.91684e-05	0.0783088			1.91684e-05	-0.032746
2.25911e-05	0.0713507			2.25911e-05	-0.170142
2.46555e-05	0.0626305			2.46555e-05	0.0201537
2.80962e-05	0.0194617			2.80962e-05	-0.0407964
3.08877e-05	0.0085761			3.08877e-05	0.0863789
3.70204e-05	-0.0546951			3.70204e-05	-0.0439446
4.11794e-05	-0.0654242			4.11794e-05	-0.0516153
1.51443e-05	-0.00822922			1.51443e-05	-0.145386
4.32608e-06	0.0226454			4.32608e-06	0.0796283
0				0
6.05786e-06	0.176814			6.05786e-06	0.187395
1.04357e-05	0.174715			1.04357e-05	0.0402858
1.34718e-05	0.0629214			1.34718e-05	-0.0141779
1.75329e-05	0.0385526			1.75329e-05	0.0942779
2.13385e-05	-0.0398399			2.13385e-05	0.114106
2.49134e-05	0.101542			2.49134e-05	0.102963
2.96791e-05	0.0704666			2.96791e-05	0.0681827
3.35452e-05	-0.0150012			3.35452e-05	0.0147863
3.83599e-05	-0.0555814			3.83599e-05	0.0459998
3.67722e-05	-0.0762862			3.67722e-05	0.00464297
4.23377e-05	-0.0175725			4.23377e-05	-0.0232999
4.58864e-05	0.118165			4.58864e-05	0.0359975
5.05954e-05	0.049452			5.05954e-05	-0.0495317
5.52832e-05	0.201706			5.52832e-05	-0.0159126
5.95905e-05	-0.0586725			5.95905e-05	0.0091447
6.15576e-05	0.0362921			6.15576e-05	0.13548
5.88096e-05	-0.010283			5.88096e-05	-0.109772
5.63349e-05	0.113793			5.63349e-05	-0.0419775
5.54751e-05	0.0496576			5.54751e-05	0.00149775
5.45761e-05	0.118316			5.45761e-05	-0.023766
5.58657e-05	0.00591337			5.58657e-05	-0.0043537
5.74604e-05	-0.0894952			5.74604e-05	0.0895317
5.97843e-05	-0.0826512			5.97843e-05	0.048683
6.34728e-05	0.0273407			6.34728e-05	0.00282414
4.58307e-05	0.00940145			4.58307e-05	-0.175609
4.32086e-05	0.0131641			4.32086e-05	0.057078
3.69208e-05	0.147298			3.69208e-05	0.275784
6.72948e-05	0.0543733			6.72948e-05	-0.0185797
6.74e-05	0.00399482			6.74e-05	-0.105534
6.75801e-05	-0.10545			6.75801e-05	-0.0422034
7.1544e-05	0.0134477			7.1544e-05	0.00326377
7.32175e-05	0.0675081			7.32175e-05	-0.019726
7.36733e-05	0.197198			7.36733e-05	0.0677062
7.44342e-05	0.000759063			7.44342e-05	-0.100061
7.42341e-05	-0.069151			7.42341e-05	0.036977
7.6379e-05	-0.0123714			7.6379e-05	0.0411077
7.96338e-05	0.00794088			7.96338e-05	-0.00406635
3.77594e-05	0.0154726			3.77594e-05	-0.0890421
3.62626e-05	0.0416443			3.62626e-05	-0.147784
3.21809e-05	0.0414423			3.21809e-05	-0.0597634
2.83046e-05	0.0550698			2.83046e-05	0.00427068
2.63834e-05	-0.0977096			2.63834e-05	-0.124078
2.41186e-05	-0.044507			2.41186e-05	0.145935
2.32807e-05	0.109893			2.32807e-05	-0.0136412
1.65293e-05	0.000735046			1.65293e-05	0.0438179
1.36833e-05	0.0179625			1.36833e-05	0.0573586
1.18238e-05	0.10048			1.18238e-05	0.00825598
1.36001e-05	-0.0484646			1.36001e-05	0.0534318
1.65585e-05	-0.073367			1.65585e-05	-0.0706129
1.8604e-05	-0.0316365			1.8604e-05	-0.0333811
2.2181e-05	0.102607			2.2181e-05	0.0886977
2.50586e-05	0.179319			2.50586e-05	-0.0821764
3.12054e-05	0.0388555			3.12054e-05	-0.0944904
3.53191e-05	0.0652119			3.53191e-05	-0.175221
1.75469e-05	0.0252234			1.75469e-05	-0.0186466
1.03635e-05	-0.0291362			1.03635e-05	0.00520687
6.05786e-06	0.176814			6.05786e-06	-0.0195264
0				0
4.74489e-06	0.188904			4.74489e-06	-0.0493516
8.76473e-06	0.105633			8.76473e-06	0.0794399
1.37438e-05	0.0984046			1.37438e-05	-0.0415121
1.75025e-05	0.108665			1.75025e-05	-0.0746111
2.09828e-05	0.152286			2.09828e-05	-0.0476479
2.56106e-05	0.0048939			2.56106e-05	-0.225722
2.92407e-05	-0.036483			2.92407e-05	-0.0854202
3.35144e-05	0.0783278			3.35144e-05	-0.00969811
3.17107e-05	0.0178972			3.17107e-05	-0.0715638
3.72889e-05	0.0286015			3.72889e-05	-0.0926178
4.0594e-05	0.0988719			4.0594e-05	0.0469027
4.5258e-05	0.0837979			4.5258e-05	-0.108181
4.99266e-05	0.141718			4.99266e-05	-0.181654
5.42405e-05	0.143888			5.42405e-05	-0.040869
5.62931e-05	0.0831948			5.62931e-05	0.0920757
5.37675e-05	0.068162			5.37675e-05	-0.0178112
5.15339e-05	0.160768			5.15339e-05	-0.0887081
5.09234e-05	-0.0566529			5.09234e-05	-0.190042
5.04125e-05	0.125959			5.04125e-05	-0.097485
5.19852e-05	0.153477			5.19852e-05	-0.20435
5.39874e-05	0.0342128			5.39874e-05	-0.0891643
5.57102e-05	0.15421			5.57102e-05	-0.100581
5.95341e-05	0.0900562			5.95341e-05	-0.128278
4.22102e-05	-0.00566551			4.22102e-05	-0.186127
3.99926e-05	-0.131468			3.99926e-05	0.0454683
3.3941e-05	0.137484			3.3941e-05	0.0473386
6.27785e-05	0.0818402			6.27785e-05	0.0592317
6.27045e-05	0.105897			6.27045e-05	-0.137378
6.24443e-05	0.0221954			6.24443e-05	-0.122771
6.64199e-05	0.0539741			6.64199e-05	-0.208042
6.82172e-05	0.0547246			6.82172e-05	-0.0313116
6.88025e-05	0.175317			6.88025e-05	0.0211261
6.97815e-05	0.0334579			6.97815e-05	-0.101273
6.98595e-05	-0.0163642			6.98595e-05	-0.178968
7.22528e-05	0.0902971			7.22528e-05	-0.157277
7.56209e-05	0.0675364			7.56209e-05	-0.175855
4.21258e-05	-0.0428499			4.21258e-05	0.0427775
4.01789e-05	0.106444			4.01789e-05	-0.0678174
3.57752e-05	0.0373632			3.57752e-05	-0.0724964
3.16834e-05	0.0264215			3.16834e-05	-0.0966186
2.9319e-05	0.114064			2.9319e-05	-0.0223546
2.65076e-05	0.0650569			2.65076e-05	0.0186779
2.48888e-05	0.204992			2.48888e-05	0.0650057
1.79928e-05	0.0746884			1.79928e-05	-0.15907
1.4561e-05	0.0248789			1.4561e-05	-0.124957
1.11346e-05	0.0735587			1.11346e-05	-0.0136296
1.17917e-05	0.12226			1.17917e-05	0.000482166
1.30407e-05	0.0815263			1.30407e-05	0.0158684
1.45455e-05	0.155447			1.45455e-05	-0.0460349
1.76724e-05	0.104583			1.76724e-05	-0.00102248
2.04543e-05	0.0548675			2.04543e-05	-0.0620067
2.65911e-05	0.0563313			2.65911e-05	-0.142628
3.0744e-05	0.107692			3.0744e-05	-0.0532946
2.18812e-05	-0.0161953			2.18812e-05	-0.136118
1.47455e-05	0.0383919			1.47455e-05	0.0548039
1.04357e-05	0.174715			1.04357e-05	0.0706788
4.74489e-06	0.188904			4.74489e-06	0.0194995
0				0
4.60247e-06	0.0934274			4.60247e-06	0.12764
9.94454e-06	0.0607844			9.94454e-06	-0.00819666
1.34899e-05	0.0691409			1.34899e-05	-0.00499795
1.68198e-05	0.18654			1.68198e-05	0.0281384
2.1303e-05	0.0316709			2.1303e-05	-0.0717992
2.47889e-05	-0.0444843			2.47889e-05	-0.056766
2.88484e-05	0.104421			2.88484e-05	-0.0104329
2.69968e-05	0.00663243			2.69968e-05	0.0210285
3.25723e-05	0.0425115			3.25723e-05	-0.128944
3.58498e-05	0.0987884			3.58498e-05	-0.00231548
4.05131e-05	0.0997801			4.05131e-05	-0.0793435
4.51821e-05	0.207455			4.51821e-05	-0.115737
4.9496e-05	0.0372505			4.9496e-05	-0.0452238
5.15489e-05	0.0445764			5.15489e-05	0.0399967
4.90443e-05	0.0103552			4.90443e-05	-0.0536955
4.68592e-05	0.0115967			4.68592e-05	-0.0915247
4.63188e-05	0.0902104			4.63188e-05	-0.0804464
4.59476e-05	0.068406			4.59476e-05	-0.0716259
4.7636e-05	0.173188			4.7636e-05	-0.000735414
4.98238e-05	0.0536823			4.98238e-05	-0.0246717
5.12716e-05	0.0398955			5.12716e-05	0.0615547
5.51448e-05	0.113084			5.51448e-05	-0.175287
3.80163e-05	0.00354101			3.80163e-05	-0.104217
3.60255e-05	-0.0338627			3.60255e-05	-0.00598361
3.01617e-05	0.0646557			3.01617e-05	-0.00187878
5.81736e-05	0.00612179			5.81736e-05	0.0153092
5.8049e-05	-0.0439635			5.8049e-05	-0.12128
5.77078e-05	0.0665582			5.77078e-05	-0.0730629
6.16841e-05	0.123407			6.16841e-05	0.0375616
6.34965e-05	0.0433489			6.34965e-05	-0.164179
6.41044e-05	0.146579			6.41044e-05	-0.0320052
6.51336e-05	0.222218			6.51336e-05	0.045594
6.52941e-05	-0.0839206			6.52941e-05	-0.056231
6.77731e-05	0.145002			6.77731e-05	-0.120812
7.11814e-05	-0.0410032			7.11814e-05	-0.0674473
4.65032e-05	0.0593598			4.65032e-05	0.0767995
4.47385e-05	0.0463346			4.47385e-05	-0.00761382
4.03738e-05	-0.108751			4.03738e-05	-0.0302618
3.62854e-05	-0.0803884			3.62854e-05	0.0243745
3.38887e-05	0.0535243			3.38887e-05	0.0961396
3.0984e-05	0.0185407			3.0984e-05	0.0172281
2.91456e-05	-0.0703025			2.91456e-05	0.0432473
2.22762e-05	-0.0273741			2.22762e-05	-0.0692052
1.87107e-05	0.00214893			1.87107e-05	0.0193204
1.47226e-05	0.0828371			1.47226e-05	0.0026553
1.45668e-05	-0.000650097			1.45668e-05	-0.0581985
1.3785e-05	0.120574			1.3785e-05	0.0263974
1.41893e-05	0.0960277			1.41893e-05	0.122216
1.59649e-05	0.0588262			1.59649e-05	-0.00488286
1.82966e-05	0.109641			1.82966e-05	-0.0389411
2.42672e-05	0.165678			2.42672e-05	-0.108697
2.8513e-05	0.107856			2.8513e-05	-0.0459354
2.62683e-05	0.00587943			2.62683e-05	-0.131833
1.75426e-05	0.161919			1.75426e-05	0.0106295
1.34718e-05	0.0629214			1.34718e-05	0.113741
8.76473e-06	0.105633			8.76473e-06	0.0134556
4.60247e-06	0.0934274			4.60247e-06	0.018423
0				0
5.35964e-06	0.0802639			5.35964e-06	-0.0619861
8.89963e-06	-0.0961358			8.89963e-06	0.0189517
1.22841e-05	-0.0208631			1.22841e-05	0.0355906
1.6858e-05	0.0296796			1.6858e-05	0.0362129
2.04799e-05	0.0942384			2.04799e-05	0.0454833
2.49407e-05	-0.00670232			2.49407e-05	-0.014633
2.33017e-05	0.0424286			2.33017e-05	-0.0400164
2.88703e-05	-0.00822952			2.88703e-05	-0.0936434
3.24369e-05	0.0259697			3.24369e-05	-0.0920816
3.71565e-05	0.0180109			3.71565e-05	-0.0398713
4.18476e-05	0.0976742			4.18476e-05	-0.0721551
4.61495e-05	0.0494909			4.61495e-05	0.0428
4.80939e-05	0.122953			4.80939e-05	0.00766947
4.53484e-05	0.129044			4.53484e-05	-0.0221938
4.29495e-05	0.0458426			4.29495e-05	0.148699
4.22311e-05	0.0312052			4.22311e-05	0.0106173
4.165e-05	0.154014			4.165e-05	-0.0387981
4.32304e-05	0.119533			4.32304e-05	-0.0371211
4.531e-05	0.0848166			4.531e-05	-0.0735742
4.69456e-05	0.188467			4.69456e-05	-0.101207
5.07726e-05	0.117319			5.07726e-05	-0.149111
3.35128e-05	-0.0012974			3.35128e-05	0.0119531
3.14464e-05	0.0520142			3.14464e-05	0.0297198
2.55598e-05	-0.0724962			2.55598e-05	0.114428
5.40811e-05	0.0382593			5.40811e-05	0.116542
5.40735e-05	0.0655548			5.40735e-05	0.00193092
5.41094e-05	0.0779184			5.41094e-05	-0.075623
5.80744e-05	0.0593004			5.80744e-05	-0.0849859
5.97685e-05	0.0921997			5.97685e-05	-0.146708
6.02659e-05	0.117736			6.02659e-05	0.0762475
6.1135e-05	0.0507331			6.1135e-05	-0.0466771
6.1129e-05	-0.0554928			6.1129e-05	-0.00984057
6.34911e-05	-0.133524			6.34911e-05	-0.0788359
6.68561e-05	0.137468			6.68561e-05	-0.0705311
5.14484e-05	0.044853			5.14484e-05	-0.0101874
4.99508e-05	0.00975136			4.99508e-05	-0.0141318
4.5675e-05	-0.0869871			4.5675e-05	-0.0731549
4.16185e-05	-0.057315			4.16185e-05	0.0703197
3.92482e-05	0.0562072			3.92482e-05	-0.0632563
3.63219e-05	0.0667296			3.63219e-05	0.014354
3.43756e-05	0.0853343			3.43756e-05	0.0173213
2.75357e-05	0.0116191			2.75357e-05	-0.0647171
2.39171e-05	0.0350686			2.39171e-05	0.0449228
1.96825e-05	0.222026			1.96825e-05	-0.0369047
1.90573e-05	-0.0697896			1.90573e-05	0.147696
1.68209e-05	-0.00803016			1.68209e-05	-0.0570568
1.61474e-05	0.0275649			1.61474e-05	-0.0901904
1.61679e-05	-0.112718			1.61679e-05	0.0813625
1.76908e-05	-0.0972259			1.76908e-05	-0.0449275
2.30936e-05	-0.0475313			2.30936e-05	0.0769939
2.7318e-05	0.00565382			2.7318e-05	-0.00274756
3.12771e-05	-0.0112103			3.12771e-05	0.0757981
2.11948e-05	0.0946264			2.11948e-05	0.127425
1.75329e-05	0.0385526			1.75329e-05	0.0445911
1.37438e-05	0.0984045			1.37438e-05	-0.0268369
9.94454e-06	0.0607844			9.94454e-06	0.00766781
5.35964e-06	0.0802639			5.35964e-06	0.0438067
0				0
3.82149e-06	0.339148			3.82149e-06	0.0414702
7.38859e-06	0.148691			7.38859e-06	-0.0129721
1.21465e-05	0.188293			1.21465e-05	0.0609188
1.6037e-05	0.0985024			1.6037e-05	0.0924593
2.12194e-05	0.21874			2.12194e-05	-0.0432392
2.00079e-05	0.193206			2.00079e-05	-0.0318576
2.54342e-05	0.162167			2.54342e-05	-0.131163
2.94113e-05	-0.0156553			2.94113e-05	-0.0455828
3.41493e-05	-0.0352565			3.41493e-05	-0.0330852
3.88207e-05	-0.0448099			3.88207e-05	-0.224259
4.30661e-05	0.0458896			4.30661e-05	-0.0752619
4.4834e-05	0.0102134			4.4834e-05	0.0582018
4.17388e-05	-0.0366892			4.17388e-05	-0.0898481
3.90134e-05	0.114506			3.90134e-05	-0.00980702
3.80007e-05	0.0899271			3.80007e-05	0.0085315
3.70486e-05	0.0267747			3.70486e-05	-0.0998748
3.84178e-05	0.0608405			3.84178e-05	-0.00962664
4.02682e-05	0.043843			4.02682e-05	-0.138723
4.22749e-05	0.126108			4.22749e-05	0.0585723
4.60072e-05	0.20645			4.60072e-05	-0.0172919
2.85171e-05	0.106793			2.85171e-05	-0.107252
2.62519e-05	0.25339			2.62519e-05	-0.00186311
2.02629e-05	0.0512848			2.02629e-05	-0.00589153
4.97946e-05	0.0208102			4.97946e-05	0.0893384
4.99773e-05	0.104626			4.99773e-05	0.132546
5.05982e-05	0.13883			5.05982e-05	-0.0894528
5.45281e-05	0.164551			5.45281e-05	0.0133324
5.60373e-05	0.0919975			5.60373e-05	0.0372434
5.63638e-05	0.168703			5.63638e-05	0.0677075
5.69801e-05	0.0891899			5.69801e-05	-0.00234917
5.67042e-05	0.0273102			5.67042e-05	0.125054
5.88648e-05	0.0159241			5.88648e-05	0.0164657
6.21503e-05	0.0867267			6.21503e-05	-0.0248189
5.52406e-05	-0.0428862			5.52406e-05	0.00162699
5.36322e-05	-0.0517175			5.36322e-05	-0.0314468
4.92638e-05	-0.0132236			4.92638e-05	-0.0122338
4.51478e-05	0.00502474			4.51478e-05	0.115535
4.26465e-05	0.0650731			4.26465e-05	0.0127986
3.95605e-05	0.169577			3.95605e-05	0.0620712
3.7365e-05	0.0629349			3.7365e-05	-0.0168887
3.06065e-05	0.164337			3.06065e-05	0.0303657
2.6919e-05	0.124174			2.6919e-05	0.0227702
2.24217e-05	0.0383659			2.24217e-05	0.0166936
2.13675e-05	0.032345			2.13675e-05	0.203211
1.81022e-05	-0.0690903			1.81022e-05	0.0737288
1.6706e-05	-0.110039			1.6706e-05	-0.0779224
1.54792e-05	-0.024686			1.54792e-05	-0.0462398
1.63297e-05	0.137996			1.63297e-05	-0.0796454
2.11292e-05	-0.077354			2.11292e-05	0.0909281
2.52429e-05	0.0433944			2.52429e-05	-0.0425615
3.50484e-05	0.0374777			3.50484e-05	0.0262785
2.4938e-05	0.00750597			2.4938e-05	-0.00588636
2.13385e-05	-0.0398399			2.13385e-05	0.0141303
1.75025e-05	0.108665			1.75025e-05	-0.173334
1.34899e-05	0.0691409			1.34899e-05	-0.0135939
8.89963e-06	-0.0961359			8.89963e-06	-0.000600374
3.82149e-06	0.339148			3.82149e-06	-0.141712
0				0
3.575e-06	0.212187			3.575e-06	7.46958e-05
8.34749e-06	0.169735			8.34749e-06	-0.0223809
1.22942e-05	0.127453			1.22942e-05	0.0204883
1.77389e-05	0.178581			1.77389e-05	-0.0467105
1.67699e-05	0.148308			1.67699e-05	0.0844914
2.20548e-05	0.102386			2.20548e-05	-0.213096
2.62086e-05	0.0387456			2.62086e-05	0.143769
3.0923e-05	0.141597			3.0923e-05	-0.0776246
3.55609e-05	0.081524			3.55609e-05	-0.0908553
3.97628e-05	0.0634796			3.97628e-05	-0.15092
4.1444e-05	0.111489			4.1444e-05	0.123734
3.82078e-05	-0.06663			3.82078e-05	0.0377714
3.53657e-05	0.0937366			3.53657e-05	-0.146329
3.42633e-05	0.141959			3.42633e-05	-0.0151918
3.32377e-05	-0.046155			3.32377e-05	-0.117004
3.4597e-05	0.0788131			3.4597e-05	-0.0641098
3.64856e-05	0.0714606			3.64856e-05	-0.0432066
3.84566e-05	0.171835			3.84566e-05	0.0839361
4.21858e-05	0.0176518			4.21858e-05	0.130369
2.47179e-05	0.0937203			2.47179e-05	-0.120835
2.25488e-05	0.172856			2.25488e-05	0.0943603
1.66961e-05	0.185127			1.66961e-05	-0.147509
4.60339e-05	0.0151804			4.60339e-05	0.0461312
4.62656e-05	0.0342175			4.62656e-05	-0.045809
4.70892e-05	0.118244			4.70892e-05	-0.0975619
5.09993e-05	0.0959795			5.09993e-05	0.0326092
5.24376e-05	-0.0185523			5.24376e-05	0.00282075
5.27057e-05	0.135455			5.27057e-05	-0.164799
5.32477e-05	0.196653			5.32477e-05	-0.0313662
5.29132e-05	0.131044			5.29132e-05	-0.0434355
5.5048e-05	0.156703			5.5048e-05	0.0312347
5.83293e-05	0.031514			5.83293e-05	0.0317412
5.87402e-05	0.0299491			5.87402e-05	-0.0363793
5.69987e-05	-0.0118514			5.69987e-05	-0.086155
5.25349e-05	-0.102715			5.25349e-05	-0.0274636
4.8363e-05	0.00342162			4.8363e-05	0.00740152
4.57384e-05	0.037474			4.57384e-05	-0.0438606
4.25094e-05	-0.00795706			4.25094e-05	0.0313955
4.00944e-05	0.119071			4.00944e-05	-0.0351092
3.34374e-05	0.143701			3.34374e-05	0.0395108
2.97121e-05	0.080663			2.97121e-05	-0.0448589
2.50379e-05	0.147273			2.50379e-05	-0.0563229
2.36508e-05	-0.138861			2.36508e-05	0.0149334
1.96204e-05	-0.114671			1.96204e-05	-0.0667809
1.7661e-05	0.000261723			1.7661e-05	0.0403716
1.53454e-05	-0.0230635			1.53454e-05	-0.0231715
1.54752e-05	0.0489346			1.54752e-05	-0.0248334
1.94789e-05	0.0627754			1.94789e-05	0.0195481
2.33979e-05	0.0121115			2.33979e-05	-0.032985
3.85259e-05	0.0492847			3.85259e-05	-0.079818
2.84991e-05	0.0823409			2.84991e-05	-0.0694267
2.49134e-05	0.101542			2.49134e-05	0.150698
2.09828e-05	0.152286			2.09828e-05	-0.0163326
1.68198e-05	0.18654			1.68198e-05	0.00498687
1.22841e-05	-0.0208631			1.22841e-05	0.0350329
7.38859e-06	0.148691			7.38859e-06	-0.0177937
3.575e-06	0.212187			3.575e-06	-0.0263773
0				0
4.77709e-06	0.275413			4.77709e-06	-0.0588948
8.76848e-06	0.100255			8.76848e-06	0.0691298
1.44728e-05	0.284745			1.44728e-05	-0.11837
1.3794e-05	0.165993			1.3794e-05	-0.0643679
1.88682e-05	0.0501912			1.88682e-05	0.0293522
2.31807e-05	-0.0914805			2.31807e-05	0.00636731
2.78489e-05	0.0561311			2.78489e-05	-0.104002
3.24392e-05	0.0516328			3.24392e-05	-0.141048
3.65904e-05	0.0298586			3.65904e-05	-0.0116585
3.81892e-05	0.131719			3.81892e-05	0.0800742
3.48308e-05	-0.118642			3.48308e-05	0.106742
3.18915e-05	0.0435935			3.18915e-05	-0.0151353
3.07215e-05	0.052395			3.07215e-05	-0.00952098
2.96631e-05	-0.000286071			2.96631e-05	-0.0622171
3.10473e-05	0.0916872			3.10473e-05	0.0529477
3.30263e-05	-0.0277789			3.30263e-05	0.0236031
3.48864e-05	0.0460988			3.48864e-05	-0.0723545
3.86284e-05	0.204933			3.86284e-05	0.0705313
2.12332e-05	0.133448			2.12332e-05	-0.144386
1.92474e-05	0.0448138			1.92474e-05	-0.0544493
1.36641e-05	0.0723629			1.36641e-05	-0.160317
4.24758e-05	0.118491			4.24758e-05	-0.0641547
4.27384e-05	0.0414539			4.27384e-05	-0.029064
4.37231e-05	0.0879349			4.37231e-05	0.0811317
4.76137e-05	0.13598			4.76137e-05	0.027569
4.89932e-05	0.104609			4.89932e-05	-0.0666991
4.9216e-05	0.323221			4.9216e-05	-0.104406
4.97058e-05	0.359682			4.97058e-05	-0.0748007
4.9341e-05	0.0171016			4.9341e-05	-0.143643
5.14762e-05	0.143288			5.14762e-05	-0.0465596
5.47653e-05	0.017996			5.47653e-05	-0.100445
6.33612e-05	0.0325085			6.33612e-05	-0.0402931
6.14274e-05	0.0140573			6.14274e-05	-0.0203332
5.68384e-05	-0.0681308			5.68384e-05	0.0229993
5.25985e-05	0.0535243			5.25985e-05	0.0456654
4.98197e-05	0.106359			4.98197e-05	-0.00465588
4.64192e-05	-0.0191025			4.64192e-05	-0.0912704
4.37411e-05	0.0700815			4.37411e-05	-0.127407
3.72442e-05	0.0281928			3.72442e-05	0.0620489
3.35001e-05	0.0994721			3.35001e-05	-0.0492296
2.867e-05	0.15518			2.867e-05	-0.0914958
2.69297e-05	0.0185974			2.69297e-05	-0.0172701
2.21424e-05	-0.0490557			2.21424e-05	0.0491682
1.9621e-05	0.0778194			1.9621e-05	0.000776725
1.61261e-05	-0.0375484			1.61261e-05	-0.0857511
1.52735e-05	-0.0190827			1.52735e-05	0.00418709
1.78451e-05	0.00825063			1.78451e-05	0.0115484
2.13158e-05	0.0665864			2.13158e-05	0.0158566
4.3125e-05	-0.027115			4.3125e-05	-0.0323049
3.32757e-05	0.0520835			3.32757e-05	0.0371192
2.96791e-05	0.0704666			2.96791e-05	-0.0803095
2.56106e-05	0.00489389			2.56106e-05	-0.0129132
2.1303e-05	0.0316709			2.1303e-05	-0.0227455
1.6858e-05	0.0296796			1.6858e-05	0.0853855
1.21465e-05	0.188293			1.21465e-05	-0.0625177
8.34749e-06	0.169735			8.34749e-06	-0.0370397
4.77709e-06	0.275413			4.77709e-06	-0.0159734
0				0
4.07893e-06	0.304549			4.07893e-06	-0.055578
1.02415e-05	0.230556			1.02415e-05	0.00720124
1.01726e-05	0.1921			1.01726e-05	-0.074312
1.47001e-05	0.165786			1.47001e-05	-0.119411
1.92208e-05	-0.110935			1.92208e-05	-0.0495038
2.37688e-05	-0.00949282			2.37688e-05	-0.0464694
2.82585e-05	-0.0299927			2.82585e-05	-0.140328
3.23189e-05	0.0388534			3.23189e-05	-0.0272469
3.37959e-05	0.0788808			3.37959e-05	0.0582913
3.02744e-05	-0.0674948			3.02744e-05	0.0759587
2.72091e-05	0.0102431			2.72091e-05	-0.0379871
2.59612e-05	0.0663191			2.59612e-05	-0.0829788
2.49053e-05	-0.00591108			2.49053e-05	-0.0376083
2.63746e-05	0.109382			2.63746e-05	0.16218
2.85589e-05	0.0877523			2.85589e-05	0.0179556
3.01502e-05	0.074542			3.01502e-05	-0.00101146
3.39307e-05	0.172373			3.39307e-05	-0.0863213
1.6748e-05	0.121132			1.6748e-05	-0.0497756
1.52142e-05	0.13534			1.52142e-05	-0.122073
1.0438e-05	0.0429187			1.0438e-05	-0.135809
3.77019e-05	-0.0628397			3.77019e-05	-0.0395467
3.79901e-05	0.236012			3.79901e-05	0.0020506
3.91693e-05	0.0545262			3.91693e-05	-0.10401
4.30311e-05	0.117756			4.30311e-05	0.0361096
4.43364e-05	0.0792702			4.43364e-05	0.0163222
4.4506e-05	0.0949979			4.4506e-05	-0.150366
4.49431e-05	0.156908			4.49431e-05	-0.0493283
4.45657e-05	0.296018			4.45657e-05	0.0269273
4.67316e-05	0.186582			4.67316e-05	0.018674
5.00453e-05	0.0653857			5.00453e-05	0.045484
6.69144e-05	0.00913014			6.69144e-05	-0.043719
6.47177e-05	-0.0588924			6.47177e-05	0.0389208
5.99836e-05	-0.14265			5.99836e-05	-0.0931899
5.56743e-05	-0.0431171			5.56743e-05	0.0503422
5.27335e-05	0.0663813			5.27335e-05	0.0399713
4.91653e-05	0.112			4.91653e-05	0.00220041
4.62375e-05	0.091549			4.62375e-05	-0.073783
3.99339e-05	0.118683			3.99339e-05	-0.0131602
3.61985e-05	0.0804454			3.61985e-05	-0.0664991
3.12699e-05	0.148717			3.12699e-05	-0.0645264
2.92395e-05	0.0112261			2.92395e-05	0.162193
2.39159e-05	0.111554			2.39159e-05	0.0588339
2.10223e-05	0.0310781			2.10223e-05	-0.00581959
1.67534e-05	-0.0786121			1.67534e-05	0.015361
1.51347e-05	-0.0324974			1.51347e-05	0.0623092
1.62563e-05	0.00822612			1.62563e-05	0.0276007
1.91808e-05	0.115262			1.91808e-05	0.0503873
4.66691e-05	-0.00147663			4.66691e-05	0.039812
3.72236e-05	0.195395			3.72236e-05	-0.0863552
3.35452e-05	-0.0150012			3.35452e-05	-0.0845054
2.92407e-05	-0.036483			2.92407e-05	-0.0413069
2.47889e-05	-0.0444843			2.47889e-05	0.0976936
2.04799e-05	0.0942384			2.04799e-05	-0.0945277
1.6037e-05	0.0985024			1.6037e-05	-0.00388735
1.22942e-05	0.127453			1.22942e-05	-0.0078755
8.76848e-06	0.100255			8.76848e-06	-0.085158
4.07893e-06	0.304549			4.07893e-06	0.0605912
0				0
6.45707e-06	0.107702			6.45707e-06	-0.0441993
7.08895e-06	0.0920945			7.08895e-06	0.0272189
1.08746e-05	0.101158			1.08746e-05	-0.0709912
1.55023e-05	-0.121794			1.55023e-05	0.0587717
1.99305e-05	-0.0556018			1.99305e-05	-0.015956
2.4342e-05	0.0201195			2.4342e-05	-0.0085108
2.83463e-05	0.0482467			2.83463e-05	-0.00170842
2.97678e-05	0.188966			2.97678e-05	0.049513
2.62003e-05	-0.0374188			2.62003e-05	0.11558
2.31407e-05	0.0728028			2.31407e-05	0.021201
2.19703e-05	0.0606561			2.19703e-05	-0.0657652
2.11727e-05	0.0835496			2.11727e-05	-0.0126453
2.2901e-05	0.0191161			2.2901e-05	0.0752494
2.54963e-05	0.0116911			2.54963e-05	0.033374
2.64842e-05	0.0907947			2.64842e-05	0.046268
3.03655e-05	0.00305698			3.03655e-05	-0.0228198
1.38164e-05	-0.0293444			1.38164e-05	-0.0570053
1.31768e-05	0.176812			1.31768e-05	-0.0508567
1.00171e-05	0.0850392			1.00171e-05	-0.0104252
3.3758e-05	-0.0290803			3.3758e-05	-0.054403
3.39738e-05	0.105222			3.39738e-05	-0.0843573
3.50945e-05	-0.052567			3.50945e-05	-0.00537426
3.8953e-05	0.00734795			3.8953e-05	0.0722639
4.02622e-05	0.0831512			4.02622e-05	-0.0237399
4.04522e-05	0.0719265			4.04522e-05	-0.18167
4.09541e-05	0.00629294			4.09541e-05	-0.0783209
4.07018e-05	0.197175			4.07018e-05	-0.00708781
4.30122e-05	0.0674795			4.30122e-05	0.133573
4.63956e-05	-0.0144088			4.63956e-05	0.0886969
7.06894e-05	-0.0341873			7.06894e-05	-0.0387765
6.78893e-05	-0.145426			6.78893e-05	-0.101391
6.28691e-05	-0.131266			6.28691e-05	-0.00280711
5.84455e-05	-0.0196526			5.84455e-05	0.0591864
5.52019e-05	-0.0409278			5.52019e-05	-0.0126792
5.13434e-05	-0.100097			5.13434e-05	0.0351235
4.79836e-05	0.26853			4.79836e-05	0.0103372
4.21321e-05	0.0904977			4.21321e-05	0.0556006
3.84815e-05	0.123267			3.84815e-05	0.045135
3.34905e-05	0.0657369			3.34905e-05	-0.16192
3.10156e-05	0.0248124			3.10156e-05	0.119691
2.50286e-05	-0.0748647			2.50286e-05	0.000322831
2.17228e-05	-0.112694			2.17228e-05	-0.0907052
1.6647e-05	-0.209499			1.6647e-05	-0.0932583
1.40411e-05	-0.100865			1.40411e-05	-0.0108126
1.26189e-05	-0.129753			1.26189e-05	-0.0934226
1.44292e-05	0.0145556			1.44292e-05	0.00353635
5.05382e-05	0.0907292			5.05382e-05	-0.0265951
4.22671e-05	0.157557			4.22671e-05	-0.0492629
3.83599e-05	-0.0555814			3.83599e-05	-0.0559951
3.35144e-05	0.0783278			3.35144e-05	0.0624644
2.88484e-05	0.104421			2.88484e-05	-0.0774279
2.49407e-05	-0.00670232			2.49407e-05	0.099156
2.12194e-05	0.21874			2.12194e-05	-0.148062
1.77389e-05	0.178581			1.77389e-05	0.031218
1.44728e-05	0.284745			1.44728e-05	-0.180741
1.02415e-05	0.230556			1.02415e-05	-0.029084
6.45707e-06	0.107702			6.45707e-06	0.125434
0				0
2.75453e-06	0.33704			2.75453e-06	0.0407194
4.45877e-06	0.21035			4.45877e-06	-0.0292901
9.04606e-06	-0.171578			9.04606e-06	-0.0608031
1.35295e-05	0.0428005			1.35295e-05	-0.0149617
1.80281e-05	0.0214603			1.80281e-05	-0.121624
2.2132e-05	-0.0578274			2.2132e-05	0.0240924
2.37215e-05	0.0243413			2.37215e-05	0.132087
2.05227e-05	-0.164388			2.05227e-05	0.138102
1.80208e-05	0.0425843			1.80208e-05	-0.053692
1.76021e-05	0.0649882			1.76021e-05	-0.056794
1.81251e-05	-0.0504712			1.81251e-05	-0.0280542
2.06812e-05	0.00512902			2.06812e-05	0.023028
2.43095e-05	-0.0181264			2.43095e-05	0.0605949
2.34671e-05	0.0280297			2.34671e-05	-0.0343735
2.75767e-05	0.14719			2.75767e-05	-0.0259457
1.39326e-05	0.0784044			1.39326e-05	-0.0798981
1.52051e-05	-0.0929549			1.52051e-05	-0.0577001
1.46113e-05	0.0120744			1.46113e-05	-0.10921
2.94152e-05	0.00897076			2.94152e-05	-0.0790035
2.92013e-05	0.00782127			2.92013e-05	0.0479835
2.93793e-05	-0.0379665			2.93793e-05	-0.0392328
3.33095e-05	0.0484997			3.33095e-05	0.007117
3.48716e-05	0.00534793			3.48716e-05	-0.0710484
3.53252e-05	0.182121			3.53252e-05	-0.137936
3.62893e-05	0.203318			3.62893e-05	-0.0882025
3.66483e-05	0.150044			3.66483e-05	0.0317881
3.94865e-05	0.156783			3.94865e-05	-0.044381
4.30701e-05	-0.0370818			4.30701e-05	0.0225956
6.85861e-05	-0.214929			6.85861e-05	-0.0895264
6.56069e-05	-0.161506			6.56069e-05	-0.109338
6.05189e-05	-0.0226539			6.05189e-05	0.00242754
5.60738e-05	-0.00533977			5.60738e-05	0.0113453
5.27664e-05	-0.0640162			5.27664e-05	0.0570123
4.88547e-05	-0.0124924			4.88547e-05	0.109706
4.54228e-05	0.0668569			4.54228e-05	0.0056342
3.96671e-05	0.0191666			3.96671e-05	0.112255
3.60452e-05	0.0522971			3.60452e-05	0.0625582
3.10605e-05	-0.00348776			3.10605e-05	-0.167883
2.85077e-05	0.00869215			2.85077e-05	0.0180085
2.24398e-05	-0.0229545			2.24398e-05	-0.0442031
1.90956e-05	-0.159137			1.90956e-05	-0.0336482
1.39619e-05	-0.20254			1.39619e-05	-0.0537686
1.12979e-05	-0.0303587			1.12979e-05	0.00988838
1.01023e-05	-0.12202			1.01023e-05	-0.0486484
1.23659e-05	-0.0839541			1.23659e-05	0.0201931
4.85052e-05	0.0414306			4.85052e-05	-0.00305636
4.07803e-05	0.0860914			4.07803e-05	-0.0434541
3.67722e-05	-0.0762862			3.67722e-05	-0.166164
3.17107e-05	0.0178972			3.17107e-05	-0.0587772
2.69968e-05	0.00663243			2.69968e-05	-0.111458
2.33017e-05	0.0424286			2.33017e-05	-0.00278787
2.00079e-05	0.193206			2.00079e-05	-0.0963139
1.67699e-05	0.148308			1.67699e-05	-0.0125441
1.3794e-05	0.165993			1.3794e-05	-0.097168
1.01726e-05	0.1921			1.01726e-05	0.111738
7.08895e-06	0.0920945			7.08895e-06	0.107683
2.75453e-06	0.337041			2.75453e-06	-0.00929196
0				0
5.57931e-06	0.0801146			5.57931e-06	-0.117766
9.43873e-06	-0.0675566			9.43873e-06	-0.12671
1.41603e-05	-0.0112423			1.41603e-05	-0.0639568
1.8818e-05	-0.0320576			1.8818e-05	-0.219986
2.30584e-05	-0.0213615			2.30584e-05	0.0768913
2.48663e-05	0.0344768			2.48663e-05	0.0831599
2.20646e-05	-0.140225			2.20646e-05	-0.0028701
1.99644e-05	0.0225097			1.99644e-05	-0.102759
1.98761e-05	0.0646442			1.98761e-05	-0.00336595
2.07195e-05	-0.0500017			2.07195e-05	0.0313784
2.33689e-05	-0.0219546			2.33689e-05	-0.0428125
2.70555e-05	0.00337825			2.70555e-05	0.0765447
2.60308e-05	0.132069			2.60308e-05	-0.0615606
3.01607e-05	0.226609			3.01607e-05	0.112566
1.66291e-05	0.0523755			1.66291e-05	-0.0022466
1.76689e-05	0.0963673			1.76689e-05	-0.0987201
1.63972e-05	-0.0216876			1.63972e-05	-0.0706677
3.1594e-05	-0.237245			3.1594e-05	-0.0560375
3.12063e-05	-0.0255319			3.12063e-05	0.105135
3.0808e-05	0.121111			3.0808e-05	0.0504764
3.47727e-05	0.0967724			3.47727e-05	-0.0109273
3.65082e-05	-0.163178			3.65082e-05	-0.0973134
3.71186e-05	0.0428635			3.71186e-05	-0.159918
3.83058e-05	0.115388			3.83058e-05	-0.0901744
3.88938e-05	0.0693494			3.88938e-05	0.0788447
4.18759e-05	0.0355308			4.18759e-05	-0.0332008
4.55e-05	0.0616195			4.55e-05	-0.0202306
7.40662e-05	-0.0489433			7.40662e-05	0.00393871
7.09479e-05	-0.0545642			7.09479e-05	-0.110969
6.57863e-05	-0.0719904			6.57863e-05	0.0334812
6.13173e-05	-0.149282			6.13173e-05	0.134773
5.79198e-05	-0.107718			5.79198e-05	-0.05416
5.39192e-05	-0.035301			5.39192e-05	-0.0103489
5.03338e-05	0.175432			5.03338e-05	0.111271
4.4792e-05	0.0658156			4.4792e-05	0.0181646
4.12255e-05	0.000139067			4.12255e-05	-0.124688
3.62639e-05	-0.0676406			3.62639e-05	-0.0877882
3.35876e-05	-0.129982			3.35876e-05	0.155961
2.7371e-05	-0.0261533			2.7371e-05	9.25398e-05
2.39461e-05	0.0110659			2.39461e-05	-0.157609
1.86719e-05	-0.0582906			1.86719e-05	-0.0560162
1.56745e-05	-0.00166462			1.56745e-05	-0.0177877
1.24223e-05	0.081361			1.24223e-05	-0.175476
1.28604e-05	0.033574			1.28604e-05	-0.0986755
5.40271e-05	-0.0674083			5.40271e-05	0.123909
4.63257e-05	0.00783433			4.63257e-05	0.00667819
4.23377e-05	-0.0175725			4.23377e-05	0.0019876
3.72889e-05	0.0286015			3.72889e-05	-0.0033588
3.25723e-05	0.0425115			3.25723e-05	-0.032038
2.88703e-05	-0.00822954			2.88703e-05	-0.128673
2.54342e-05	0.162167			2.54342e-05	-0.0211461
2.20548e-05	0.102386			2.20548e-05	0.150607
1.88682e-05	0.0501912			1.88682e-05	-0.00167552
1.47001e-05	0.165786			1.47001e-05	-0.169482
1.08746e-05	0.101158			1.08746e-05	-0.00386217
4.45877e-06	0.21035			4.45877e-06	0.0584486
5.57931e-06	0.0801146			5.57931e-06	-0.0280359
0				0
4.6931e-06	0.108045			4.6931e-06	-0.114448
9.07166e-06	-0.00342546			9.07166e-06	0.0601484
1.35834e-05	-0.0241183			1.35834e-05	-0.0183328
1.77243e-05	0.0884494			1.77243e-05	-0.0948521
1.94029e-05	-0.00320815			1.94029e-05	-0.0469132
1.64859e-05	-0.128462			1.64859e-05	-0.0370753
1.45012e-05	0.0451547			1.45012e-05	-0.031445
1.47645e-05	-0.00951696			1.47645e-05	0.180396
1.63864e-05	0.0826202			1.63864e-05	-0.047493
1.94528e-05	0.00113063			1.94528e-05	-0.0994073
2.36833e-05	0.135813			2.36833e-05	-0.00275304
2.1497e-05	0.0273578			2.1497e-05	0.0117022
2.56536e-05	0.0557192			2.56536e-05	-0.0718615
1.49452e-05	-0.0375271			1.49452e-05	-0.0306078
1.72615e-05	-0.0175484			1.72615e-05	0.0127201
1.80422e-05	-0.0853801			1.80422e-05	-0.0192318
2.62772e-05	-0.0413141			2.62772e-05	0.0349283
2.57444e-05	0.0622058			2.57444e-05	0.0157151
2.52481e-05	0.0392571			2.52481e-05	-0.0705982
2.92077e-05	-0.0664904			2.92077e-05	-0.074826
3.09291e-05	-0.0525808			3.09291e-05	-0.0316084
3.15592e-05	0.086668			3.15592e-05	0.0169333
3.28396e-05	0.0712128			3.28396e-05	0.0790037
3.36321e-05	-0.0155094			3.36321e-05	0.101734
3.68187e-05	-0.0417444			3.68187e-05	0.0181483
4.05092e-05	-0.0984301			4.05092e-05	0.0424272
7.67182e-05	0.0322153			7.67182e-05	0.0836194
7.32113e-05	0.0895755			7.32113e-05	-0.0559503
6.78959e-05	0.0436018			6.78959e-05	-0.123813
6.33904e-05	0.143071			6.33904e-05	-0.0749585
5.98274e-05	-0.0996094			5.98274e-05	-0.222309
5.56841e-05	0.0893815			5.56841e-05	-0.070954
5.18657e-05	-0.199098			5.18657e-05	0.0244671
4.67166e-05	-0.0910028			4.67166e-05	-0.123412
4.3277e-05	0.0286391			4.3277e-05	-0.207164
3.84007e-05	0.0102714			3.84007e-05	-0.0389848
3.55371e-05	0.0660711			3.55371e-05	-0.0712658
2.91872e-05	0.104742			2.91872e-05	-0.0478632
2.57279e-05	0.0322613			2.57279e-05	-0.145153
2.04577e-05	0.145707			2.04577e-05	-0.0625412
1.72612e-05	0.188283			1.72612e-05	0.0192197
1.25186e-05	0.115864			1.25186e-05	-0.0706213
1.13548e-05	0.0757434			1.13548e-05	-0.125781
5.68832e-05	-0.0432468			5.68832e-05	0.0447327
4.99755e-05	-0.0610951			4.99755e-05	-0.010275
4.58864e-05	0.118165			4.58864e-05	0.0351949
4.0594e-05	0.0988719			4.0594e-05	-0.0352854
3.58498e-05	0.0987884			3.58498e-05	-0.0173075
3.24369e-05	0.0259697			3.24369e-05	-0.0242502
2.94113e-05	-0.0156553			2.94113e-05	-0.0864971
2.62086e-05	0.0387456			2.62086e-05	-0.111629
2.31807e-05	-0.0914805			2.31807e-05	0.129393
1.92208e-05	-0.110935			1.92208e-05	-0.0841163
1.55023e-05	-0.121794			1.55023e-05	-0.103336
9.04606e-06	-0.171578			9.04606e-06	-0.0218136
9.43873e-06	-0.0675566			9.43873e-06	-0.0315232
4.6931e-06	0.108045			4.6931e-06	-0.12862
0				0
4.74134e-06	0.0785975			4.74134e-06	-0.164881
9.42858e-06	0.126805			9.42858e-06	0.0413093
1.37165e-05	0.0271849			1.37165e-05	0.0345169
1.56991e-05	0.029293			1.56991e-05	-0.0392747
1.36278e-05	-0.0473276			1.36278e-05	-0.0258114
1.28516e-05	-0.040069			1.28516e-05	-0.0251435
1.42322e-05	-0.000585509			1.42322e-05	0.0775263
1.71638e-05	0.0749584			1.71638e-05	0.0315841
2.06118e-05	0.121861			2.06118e-05	-0.0998175
2.52841e-05	0.0237091			2.52841e-05	-0.098002
2.17172e-05	0.123789			2.17172e-05	-0.0201317
2.57806e-05	0.0276269			2.57806e-05	-0.034277
1.82704e-05	-0.0799851			1.82704e-05	0.0507219
2.11457e-05	0.045927			2.11457e-05	0.0431331
2.25627e-05	0.0758143			2.25627e-05	0.0870407
2.47487e-05	0.00848878			2.47487e-05	0.0726202
2.37215e-05	-0.0416188			2.37215e-05	-0.00359024
2.19469e-05	0.0658651			2.19469e-05	-0.055343
2.59228e-05	0.0437935			2.59228e-05	-0.118259
2.79509e-05	0.0739462			2.79509e-05	0.00777332
2.8902e-05	-0.050353			2.8902e-05	0.0318491
3.06998e-05	0.000723637			3.06998e-05	0.128556
3.21392e-05	-0.158129			3.21392e-05	0.0353769
3.57644e-05	0.056466			3.57644e-05	0.0682092
3.955e-05	0.105729			3.955e-05	-0.133082
8.11264e-05	-0.0273405			8.11264e-05	0.158569
7.74421e-05	0.152108			7.74421e-05	0.0304655
7.20556e-05	0.0924329			7.20556e-05	-0.0048325
6.75387e-05	0.0345655			6.75387e-05	-0.00529647
6.3895e-05	0.179591			6.3895e-05	-0.0442659
5.96835e-05	0.0841777			5.96835e-05	0.0700034
5.5744e-05	-0.0356954			5.5744e-05	0.0571074
5.08293e-05	-0.0240247			5.08293e-05	-0.155541
4.74659e-05	0.108276			4.74659e-05	0.0146081
4.26497e-05	0.0205206			4.26497e-05	0.00844136
3.9711e-05	0.0177001			3.9711e-05	0.0571389
3.33398e-05	0.0340406			3.33398e-05	0.0194143
2.98963e-05	-0.00710848			2.98963e-05	-0.0246811
2.46942e-05	0.117128			2.46942e-05	0.08497
2.14705e-05	0.0589596			2.14705e-05	-0.0755326
1.61704e-05	0.147325			1.61704e-05	0.045577
1.39775e-05	0.114491			1.39775e-05	-0.0377388
6.13922e-05	0.126628			6.13922e-05	-0.00238463
5.4698e-05	0.0812832			5.4698e-05	-0.018413
5.05954e-05	0.049452			5.05954e-05	0.0219273
4.5258e-05	0.083798			4.5258e-05	0.0164881
4.05131e-05	0.0997801			4.05131e-05	-0.119415
3.71565e-05	0.0180109			3.71565e-05	-0.0179789
3.41493e-05	-0.0352565			3.41493e-05	0.0138916
3.0923e-05	0.141597			3.0923e-05	0.0670543
2.78489e-05	0.0561311			2.78489e-05	0.0270621
2.37688e-05	-0.00949283			2.37688e-05	0.0702721
1.99305e-05	-0.0556018			1.99305e-05	0.00508277
1.35295e-05	0.0428005			1.35295e-05	0.0306178
1.41603e-05	-0.0112423			1.41603e-05	0.063499
9.07166e-06	-0.00342546			9.07166e-06	0.0110361
4.74134e-06	0.0785975			4.74134e-06	0.134141
0				0
4.6923e-06	0.165625			4.6923e-06	-0.0101879
8.99509e-06	0.00901628			8.99509e-06	0.0277734
1.10818e-05	0.112814			1.10818e-05	0.122975
9.70428e-06	-0.00756046			9.70428e-06	-0.00646706
1.02302e-05	0.124984			1.02302e-05	-0.0443211
1.26291e-05	0.160226			1.26291e-05	-0.074261
1.66223e-05	0.122354			1.66223e-05	-0.22923
2.02363e-05	0.0713099			2.02363e-05	-0.167897
2.51628e-05	0.0837084			2.51628e-05	-0.0589031
2.034e-05	0.0780121			2.034e-05	0.0252166
2.41538e-05	0.0617551			2.41538e-05	-0.155567
2.02934e-05	0.0665604			2.02934e-05	-0.0840295
2.37258e-05	0.0772559			2.37258e-05	0.0647236
2.60916e-05	0.0392745			2.60916e-05	-0.016207
2.16023e-05	0.0310487			2.16023e-05	0.00764625
2.01735e-05	-0.0392069			2.01735e-05	0.0849978
1.74871e-05	-0.0240164			1.74871e-05	0.057929
2.14421e-05	0.0837109			2.14421e-05	-0.117904
2.36348e-05	0.0411457			2.36348e-05	-0.00507386
2.47881e-05	-0.0315093			2.47881e-05	-0.0284466
2.69441e-05	0.0379749			2.69441e-05	0.077083
2.88845e-05	0.096875			2.88845e-05	0.0710202
3.2834e-05	-0.028173			3.2834e-05	0.042274
3.66576e-05	0.0731062			3.66576e-05	-0.223837
8.56194e-05	0.0875448			8.56194e-05	-0.0861212
8.18034e-05	0.139921			8.18034e-05	0.00502173
7.6366e-05	0.0516959			7.6366e-05	0.0108212
7.18438e-05	0.0412015			7.18438e-05	-0.103227
6.81417e-05	0.106719			6.81417e-05	-0.127837
6.38828e-05	0.126433			6.38828e-05	-0.0671957
5.9856e-05	0.0473271			5.9856e-05	0.163961
5.51263e-05	0.0264803			5.51263e-05	-0.145443
5.18233e-05	0.0710603			5.18233e-05	-0.0943086
4.70567e-05	0.207472			4.70567e-05	0.0183866
4.40714e-05	0.0801006			4.40714e-05	0.0911187
3.77016e-05	0.214942			3.77016e-05	0.0367238
3.42797e-05	0.0530396			3.42797e-05	-0.0513207
2.91396e-05	0.0793327			2.91396e-05	-0.0862779
2.5916e-05	0.120083			2.5916e-05	-0.0397663
2.03642e-05	0.0717471			2.03642e-05	0.0715218
1.76514e-05	0.129073			1.76514e-05	-0.213388
6.5963e-05	0.0458617			6.5963e-05	-0.184385
5.93895e-05	0.119225			5.93895e-05	-0.0657095
5.52832e-05	0.201706			5.52832e-05	0.0916338
4.99266e-05	0.141718			4.99266e-05	0.0178008
4.51821e-05	0.207455			4.51821e-05	-0.0342835
4.18476e-05	0.0976742			4.18476e-05	-0.0472752
3.88207e-05	-0.0448099			3.88207e-05	-0.0942121
3.55609e-05	0.081524			3.55609e-05	-0.136253
3.24392e-05	0.0516328			3.24392e-05	-0.0423065
2.82585e-05	-0.0299927			2.82585e-05	-0.0359614
2.4342e-05	0.0201195			2.4342e-05	-0.130326
1.80281e-05	0.0214603			1.80281e-05	-0.0430894
1.8818e-05	-0.0320576			1.8818e-05	-0.0420719
1.35834e-05	-0.0241183			1.35834e-05	0.0406879
9.42858e-06	0.126805			9.42858e-06	0.129623
4.6923e-06	0.165625			4.6923e-06	0.0383572
0				0
4.31396e-06	0.0427849			4.31396e-06	-0.151199
6.56265e-06	0.146753			6.56265e-06	-0.0440286
6.63689e-06	0.0689242			6.63689e-06	0.0720911
9.12893e-06	0.163752			9.12893e-06	-0.180143
1.23913e-05	0.110977			1.23913e-05	-0.0441276
1.70952e-05	0.148591			1.70952e-05	-0.00703288
2.06434e-05	0.194072			2.06434e-05	-0.0528996
2.56109e-05	0.0477851			2.56109e-05	0.0715035
1.97092e-05	0.049811			1.97092e-05	-0.0166263
2.3088e-05	0.0360074			2.3088e-05	-0.0549024
2.28572e-05	0.0729236			2.28572e-05	-0.189643
2.66451e-05	-0.0114629			2.66451e-05	-0.0953158
2.97424e-05	0.0560278			2.97424e-05	0.0686914
1.8875e-05	0.0189927			1.8875e-05	0.0184857
1.69852e-05	-0.0786402			1.69852e-05	-0.196411
1.31247e-05	0.0400408			1.31247e-05	-0.191715
1.70196e-05	0.0138111			1.70196e-05	-0.0798212
1.94014e-05	0.100062			1.94014e-05	-0.163562
2.07937e-05	0.0595164			2.07937e-05	-0.0600794
2.33589e-05	0.119783			2.33589e-05	0.00272701
2.58613e-05	0.0151051			2.58613e-05	-0.067193
3.01205e-05	0.177257			3.01205e-05	-0.0784804
3.39383e-05	0.0672461			3.39383e-05	-0.0900518
8.98634e-05	-0.0961559			8.98634e-05	-0.00161367
8.59716e-05	-0.0356947			8.59716e-05	0.149579
8.05042e-05	-0.00968712			8.05042e-05	0.154141
7.59802e-05	0.0362708			7.59802e-05	0.0494201
7.22433e-05	0.145807			7.22433e-05	0.0504783
6.79567e-05	0.024359			6.79567e-05	0.0733169
6.38767e-05	-0.0217115			6.38767e-05	-0.190407
5.92657e-05	0.053633			5.92657e-05	-0.0415846
5.59999e-05	0.0713463			5.59999e-05	-0.0391488
5.12636e-05	0.0913362			5.12636e-05	0.0541579
4.82546e-05	-0.0315094			4.82546e-05	0.0700417
4.1891e-05	-0.093037			4.1891e-05	0.0128749
3.84837e-05	0.0193927			3.84837e-05	-0.0132257
3.3379e-05	-0.0523681			3.3379e-05	0.0206103
3.01592e-05	0.239494			3.01592e-05	-0.0732513
2.45071e-05	0.243576			2.45071e-05	0.144604
2.15634e-05	0.243425			2.15634e-05	-0.0520722
7.02477e-05	0.0399161			7.02477e-05	0.0659522
6.36901e-05	0.0126143			6.36901e-05	0.0315466
5.95905e-05	-0.0586725			5.95905e-05	-0.0304995
5.42405e-05	0.143888			5.42405e-05	-0.0562333
4.9496e-05	0.0372505			4.9496e-05	-0.0649811
4.61495e-05	0.0494909			4.61495e-05	-0.00644317
4.30661e-05	0.0458896			4.30661e-05	-0.0522809
3.97628e-05	0.0634796			3.97628e-05	-0.0797066
3.65904e-05	0.0298586			3.65904e-05	-0.0106669
3.23189e-05	0.0388534			3.23189e-05	-0.135821
2.83463e-05	0.0482467			2.83463e-05	-0.155007
2.2132e-05	-0.0578274			2.2132e-05	-0.146068
2.30584e-05	-0.0213615			2.30584e-05	-0.0898455
1.77243e-05	0.0884494			1.77243e-05	-0.106754
1.37165e-05	0.0271849			1.37165e-05	0.0665819
8.99509e-06	0.00901627			8.99509e-06	0.0109392
4.31396e-06	0.0427849			4.31396e-06	0.0439349
0				0
2.62886e-06	0.301899			2.62886e-06	-0.0276478
5.64444e-06	0.0512682			5.64444e-06	0.0991795
9.73384e-06	0.115182			9.73384e-06	0.0417516
1.32783e-05	0.0359272			1.32783e-05	-0.0803509
1.82022e-05	-0.00292601			1.82022e-05	-0.0366655
2.15117e-05	-0.106876			2.15117e-05	0.0540807
2.63415e-05	0.0577887			2.63415e-05	0.0427536
1.96766e-05	-0.0247444			1.96766e-05	0.0178438
2.24965e-05	0.034656			2.24965e-05	-0.0495488
2.54358e-05	-0.0413697			2.54358e-05	-0.0842342
2.94343e-05	0.00587107			2.94343e-05	-0.127593
3.30881e-05	-0.0538212			3.30881e-05	-0.152048
1.67326e-05	0.0591097			1.67326e-05	-0.00712522
1.43964e-05	0.147167			1.43964e-05	-0.13452
9.16846e-06	0.131073			9.16846e-06	-0.0325869
1.29358e-05	0.190502			1.29358e-05	-0.0674085
1.55105e-05	0.192248			1.55105e-05	-0.00217286
1.71568e-05	0.119473			1.71568e-05	-0.0323968
2.01378e-05	0.0543514			2.01378e-05	-0.0318125
2.32001e-05	0.155533			2.32001e-05	-0.127477
2.7708e-05	0.0416853			2.7708e-05	0.0239908
3.1469e-05	0.114723			3.1469e-05	-0.0135815
9.21663e-05	0.000681907			9.21663e-05	0.000522248
[truncated: 1,253 more rows]

## Sheet: Figure 3F-G
Light-Evoked Calcium (∆F/F)						Current Injection Evoked Calcium (∆F/F)					Population Data: Coefficient of Variation
Time	Trial 1	Trial 2	Trial 3	Average		Trial 1	Trial 2	Trial 3	Average		PD	Ortho	Injection	vGAT
-1.41e-05	0.0507643	-0.193265	-0.148823	-0.097108		-0.0547257	-0.0400506	-0.00202372	-0.0322667		0.37988	0.727537	0.33979	0.218918
0.0711619	0.0269084	-0.193387	-0.181236	-0.115905		-0.0674126	-0.0372842	-0.0196724	-0.0414564		0.265965	0.374573	0.423654	0.348
0.142338	0.129407	-0.140487	-0.219963	-0.0770143		-0.0643503	-0.0241808	-0.0545206	-0.0476839		0.440369	0.811174	0.185996	0.339752
0.213514	0.180399	-0.102949	-0.214391	-0.0456468		-0.0609406	-0.0435927	-0.0326815	-0.0457383		0.698454	0.853811	0.237477	0.396515
0.28469	0.21323	-0.118192	-0.144956	-0.0166392		-0.133022	0.0161948	-0.0138881	-0.0435719		0.360187	0.445999	0.283699
0.355866	0.257172	-0.0419495	-0.0973194	0.0393009		-0.155982	0.0233154	-0.0225566	-0.0517412		0.47	0.69	0.369336
0.427042	0.251333	0.0107825	-0.0682743	0.0646137		-0.121782	0.0482542	-0.027104	-0.0335439		0.5	0.66
0.498218	0.231264	0.0937384	0.0216703	0.115557		-0.0621048	0.079397	-0.0322872	-0.00499834		0.41	0.67
0.569394	0.0987179	0.096206	0.00661607	0.06718		-0.0194409	0.0367002	-0.0273556	-0.00336542
0.64057	0.0604353	0.0805188	0.0522699	0.064408		-0.00449301	0.0758565	-0.0359735	0.0117966
0.711746	0.0477121	0.0705881	0.0973958	0.0718987		-0.00598366	0.0731611	-0.0398538	0.00910788
0.782922	-0.0200867	0.0606951	0.18565	0.0754196		-0.00920852	0.0758186	-0.0281698	0.0128134
0.854098	-0.0288161	0.113792	0.153251	0.0794091		0.014055	0.0198453	-0.0311778	0.000907512
0.925274	-0.0439949	0.170384	0.135504	0.0872976		0.00637345	-0.015115	-0.0241466	-0.0109627
0.99645	-0.0331768	0.108341	0.146458	0.0738739		0.0087837	-0.059191	-0.00810553	-0.0195043
1.06763	-0.0585896	0.0628203	0.156386	0.0535388		0.0297947	-0.0377095	0.00455413	-0.00112024
1.1388	-0.138416	-0.0123024	0.176104	0.00846187		0.0166829	-0.0308471	0.00908574	-0.00169282
1.20998	-0.109633	0.0313517	0.127489	0.0164024		0.0274885	-0.0428073	0.0347275	0.00646956
1.28115	-0.10135	0.0441819	0.110508	0.0177799		0.0151388	-0.0055893	-0.00328371	0.00208859
1.35233	-0.0706659	0.0741453	0.0748007	0.0260933		0.055653	0.00296588	0.0156012	0.02474
1.42351	-0.0602552	0.0460768	0.0165394	0.00078701		0.0502917	0.000256405	0.0561564	0.0355682
1.49468	-0.0500899	-0.0302794	-0.0404775	-0.0402823		0.021594	0.0206452	0.0427925	0.0283439
1.56586	0.00981022	-0.0204149	-0.109758	-0.040121		0.0344809	0.0495745	0.00349616	0.0291839
1.63703	-0.0226451	0.00906562	-0.102761	-0.0387802		-0.0219347	0.0465754	0.0375982	0.0207463
1.70821	0.0283489	0.0709609	-0.127709	-0.00946634		-0.0628374	0.0723168	-0.0113582	-0.000626262
1.77939	0.0584325	0.115208	-0.11493	0.01957		-0.0513305	0.0300544	-0.0828773	-0.0347178
1.85056	0.035024	0.0473485	-0.130755	-0.0161276		0.0133189	-0.000604548	-0.0468312	-0.0113723
1.92174	0.0239294	0.0207737	-0.108366	-0.021221		0.0724077	-0.0365747	-0.0725934	-0.0122535
1.99291	0.0290678	-0.0360071	-0.0799814	-0.0289736		0.0719615	-0.0577917	-0.0704331	-0.0187544
2.06409	0.05274	0.0278651	-0.131756	-0.0170504		0.0889736	-0.0773331	-0.00492165	0.00223963
2.13527	0.0685435	0.0271173	-0.0519741	0.0145622		0.0929456	-0.050405	0.065562	0.0360342
2.20644	0.0509465	0.0434991	-0.00798821	0.0288191		0.127321	-0.0664718	0.188335	0.0830615
2.27762	0.0553033	-0.0187468	0.054156	0.0302375		0.148284	-0.0453831	0.233906	0.112269
2.34879	0.0153101	-0.127585	-0.016013	-0.0427626		0.246296	0.0197245	0.403745	0.223255
2.41997	0.0432907	-0.14872	-0.00132084	-0.0355832		0.364609	0.138176	0.525752	0.342845
2.49115	0.013408	-0.136581	0.0233946	-0.0332593		0.498174	0.31394	0.661629	0.491248
2.56232	0.0564435	-0.132137	0.00766982	-0.0226745		0.593438	0.377501	0.705746	0.558895
2.6335	0.00295434	-0.037833	0.00263603	-0.0107475		0.722392	0.496375	0.759606	0.659458
2.70467	0.0193395	-0.0967486	-0.0678479	-0.048419		0.777006	0.646338	0.844468	0.755937
2.77585	-0.00757836	-0.0731702	-0.0274772	-0.0360753		0.785727	0.732856	1.02391	0.847496
2.84703	0.00666967	-0.0387796	0.0207684	-0.00378049		0.845041	0.776901	1.1021	0.908015
2.9182	0.0106299	0.073079	0.0504013	0.0447034		0.841134	0.852093	1.06021	0.917811
2.98938	0.0722094	0.10747	0.151805	0.110495		0.872761	0.859386	1.06424	0.932129
3.06055	0.0623685	0.108813	0.185598	0.118927		0.821508	0.872332	1.03914	0.910994
3.13173	0.0907056	0.0798331	0.202329	0.124289		0.792172	0.867649	0.966476	0.875432
3.20291	0.104424	0.0528275	0.172264	0.109839		0.780747	0.837406	0.945158	0.854437
3.27408	0.176956	0.0179836	0.198102	0.131014		0.761824	0.75074	0.921862	0.811475
3.34526	0.184662	-0.000869105	0.168908	0.117567		0.675236	0.717479	0.826805	0.73984
3.41643	0.0681267	-0.0384156	0.130992	0.0535678		0.64142	0.680127	0.790566	0.704038
3.48761	0.104154	0.0700447	0.088595	0.0875979		0.610683	0.620561	0.742475	0.657906
3.55879	0.217139	0.0367938	0.0445595	0.0994974		0.53596	0.573184	0.667904	0.592349
3.62996	0.350588	0.180089	0.0699927	0.200223		0.506267	0.518405	0.698473	0.574381
3.70114	0.552591	0.389329	0.156644	0.366188		0.514	0.475656	0.654854	0.54817
3.77231	0.660237	0.673816	0.264201	0.532751		0.526901	0.490303	0.737018	0.584741
3.84349	0.827298	0.944483	0.319931	0.697237		0.545715	0.496017	0.681478	0.574404
3.91467	0.923602	1.10743	0.389166	0.806734		0.589065	0.516127	0.612347	0.572513
3.98584	0.969886	1.17516	0.400478	0.848508		0.622318	0.465978	0.496088	0.528128
4.05702	0.904625	1.27577	0.456619	0.879004		0.580521	0.455604	0.497435	0.511187
4.12819	0.962227	1.22164	0.526573	0.90348		0.537853	0.407422	0.535289	0.493522
4.19937	0.799977	1.14836	0.494698	0.814344		0.468597	0.37901	0.472017	0.439875
4.27055	0.641714	1.0099	0.461155	0.704256		0.491964	0.343001	0.407677	0.414214
4.34172	0.632182	0.902706	0.370978	0.635289		0.449159	0.316228	0.315349	0.360245
4.4129	0.574135	0.733337	0.382101	0.563191		0.425343	0.290868	0.275588	0.3306
4.48407	0.550283	0.614186	0.268071	0.477513		0.390797	0.3282	0.202618	0.307205
4.55525	0.495332	0.56718	0.317395	0.459969		0.372608	0.360685	0.225548	0.319614
4.62643	0.492482	0.533894	0.304062	0.443479		0.342424	0.371032	0.276808	0.330088
4.6976	0.553921	0.480624	0.296288	0.443611		0.271558	0.351546	0.23294	0.285348
4.76878	0.472419	0.410168	0.206553	0.363047		0.244245	0.396629	0.210512	0.283795
4.83995	0.514218	0.325517	0.18897	0.342902		0.227982	0.4082	0.228217	0.288133
4.91113	0.461348	0.344311	0.183163	0.329607		0.198386	0.361142	0.227196	0.262241
4.98231	0.500084	0.286171	0.2227	0.336318		0.155232	0.338681	0.285882	0.259932
5.05348	0.477337	0.331261	0.211667	0.340088		0.194366	0.349011	0.312734	0.28537
5.12466	0.508386	0.302677	0.186741	0.332601		0.195814	0.305818	0.319927	0.273853
5.19583	0.469973	0.360806	0.196163	0.342314		0.185335	0.319498	0.381765	0.295533
5.26701	0.390039	0.378055	0.27971	0.349268		0.269864	0.310824	0.343123	0.307937
5.33819	0.299047	0.401842	0.227098	0.309329		0.348253	0.264197	0.260625	0.291025
5.40936	0.364224	0.431383	0.261257	0.352288		0.376068	0.207577	0.228822	0.270823
5.48054	0.415777	0.451517	0.280467	0.382587		0.374744	0.13799	0.235726	0.249487
5.55171	0.414928	0.394891	0.310258	0.373359		0.364549	0.129447	0.248234	0.24741
5.62289	0.344402	0.437241	0.265652	0.349098		0.32699	0.164513	0.209801	0.233768
5.69407	0.369913	0.399482	0.247805	0.339067
5.76524	0.30095	0.343403	0.155524	0.266626
5.83642	0.291064	0.290697	0.165078	0.248946
5.90759	0.369799	0.274173	0.169125	0.271032
5.97877	0.361736	0.221612	0.100541	0.227963
6.04995	0.304051	0.221292	0.146568	0.22397
6.12112	0.24725	0.179515	0.129195	0.18532
6.1923	0.21253	0.168998	0.0618528	0.147794
6.26347	0.288213	0.163633	0.0136131	0.155153
6.33465	0.222174	0.16754	0.0372364	0.142317
6.40583	0.180038	0.090077	0.0723627	0.114159
6.477	0.136048	0.122621	0.0582831	0.105651
6.54818	0.0774323	0.035313	0.0532397	0.0553284
6.61935	0.0422413	-0.00468967	0.0909111	0.0428209
6.69053	0.0728879	-0.0662861	0.149938	0.0521798
6.76171	0.113811	-0.0278536	0.161865	0.0826077
6.83288	0.0879299	-0.030006	0.179453	0.0791257
6.90406	0.0796579	-0.0207386	0.220119	0.0930126
6.97523	0.0899328	-0.0194299	0.198212	0.0895715
7.04641	0.0958727	-0.0365868	0.205464	0.0882501
