# Supplementary material for: The functional organization of excitation and inhibition in the dendrites of mouse direction-selective ganglion cells
Source: eLife. 2020 Feb 25;9:e52949. doi: 10.7554/eLife.52949 (PMC7069718; doi:10.7554/eLife.52949)
Supplement: Figure 4—source data 1. [file elife-52949-fig4-data1.xlsx]

## Sheet: Figure 4A
	Direction (deg)								Tuning
Time	0	45	90	135	180	225	270	315	Direction (deg)	Calcium	Spikes
-1.54e-05	-0.0103623	-0.00251653	0.0199369	-0.00415642	0.00528774	-0.00342731	-0.0308872	-0.0192942	0	0.142102	44.5
0.0711606	-0.00920827	-0.00618535	0.0196337	-0.00136912	0.00481533	-0.00376322	-0.0308425	-0.0156245	45	0.28632	72
0.142337	-0.00236354	-0.00633304	0.0207606	-0.00250841	0.000732659	-0.00390359	-0.0228521	-0.00886452	90	0.299861	79.5
0.213513	-0.00647717	-0.00666763	0.0157359	-0.000163574	0.0039915	-0.00302161	-0.00982271	-0.00466197	135	0.212104	67.5
0.284689	-0.00507477	-0.00518742	0.0152113	0.00164474	0.00464791	-0.00224106	-0.00113511	-0.00239668	180	0.127161	40
0.355865	-0.00146697	-0.0015795	0.0168867	0.00903094	0.00538389	0.00513609	0.00652188	-0.00137827	225	0.0881855	28.5
0.427041	-0.00151664	0.00437138	0.0207053	0.00776569	0.0137912	0.00399447	0.011584	-0.000275002	270	0.0905522	30
0.498217	0.0069656	0.0167838	0.0279176	0.00733058	0.0159387	0.00371292	0.0159952	-0.000275002	315	0.121591	35
0.569393	0.00597466	0.0180588	0.0310992	0.00430364	0.0125936	0.00237331	0.0165081	-0.00125668
0.640569	0.00918012	0.0218628	0.0275277	0.0127343	0.0171048	0.00164631	0.0153587	-0.000544291
0.711745	0.0116587	0.0154721	0.0276764	0.0193836	0.0137722	-0.00162846	0.010626	-0.000422703
0.782921	0.0100717	0.0125701	0.0271725	0.0203863	0.0103434	-0.00531703	0.00660963	-0.0065674
0.854097	0.0128989	0.00742943	0.0246956	0.0211469	0.00253613	-0.00192299	0.00855518	-0.00692482
0.925273	0.0149859	-0.000158535	0.0191529	0.02336	-0.00529438	-0.00643513	0.00724937	-0.0082476
0.996449	0.0109137	-0.00523915	0.00839215	0.0219369	-0.0126798	-0.00790374	0.00819702	-0.00629893
1.06762	-0.000539764	-0.0071157	-0.00340874	0.0239285	-0.0105821	0.000766763	0.0125205	-0.00845732
1.1388	-0.00787376	-0.00581905	0	0.0182688	-0.0122994	0.00788589	0.00794655	-0.0114791
1.20998	-0.00642501	-0.00758713	0.00182416	0.0147977	-0.00741693	0.00674264	0.00652906	-0.0142079
1.28115	-0.00381394	-0.00387575	0.00248675	0.00956174	0.00244993	0.00760758	0.00422056	-0.00922684
1.35233	-0.00289751	0.00488287	0.00481074	0.00476001	0.00522641	0.00560508	0.00342447	-0.00798811
1.4235	0.000496715	-0.00311896	0.00839463	0.00430936	0.00566402	0	-0.00329285	-0.00314579
1.49468	0.00591174	-0.00237969	0.00950003	0.00273987	0.012064	-0.00715483	-0.00639186	0.00255172
1.56586	0.00506236	-0.00319823	0.0155641	-0.00431918	0.00855322	-0.0104174	-0.00793778	0.00204905
1.63703	0.0103135	0.00209015	0.0211786	-0.0119237	0.00883418	-0.0152355	-0.00831349	0
1.70821	0.0220227	0.00351613	0.0204277	-0.0139586	0.00799378	-0.0167252	-0.00525675	-0.000428415
1.77938	0.019886	0.00728675	0.0145371	-0.015165	0.00405283	-0.0191788	-0.00612703	-0.00314334
1.85056	0.00882911	0.00463922	0.00908117	-0.0122779	0.000858637	-0.0127469	-0.00450773	-0.000830717
1.92174	0.00477012	0.00661173	0.0031105	-0.00897205	0	-0.00795648	0.00190408	-0.0016696
1.99291	-0.00235195	0.000841902	0.00326582	-0.00800533	0.000116861	-0.0026216	0.000505733	-0.000672408
2.06409	-0.00295049	-0.00237134	-0.00302706	-0.00651189	0.000523802	-0.00318389	0.00349307	0.00164675
2.13526	-0.00460538	-0.00542856	-0.0093191	-0.00365425	-0.00320083	0.00725544	-0.000993917	0.00182546
2.20644	-0.00454743	-0.00326665	-0.00998747	0.00238491	-0.00294473	0.010088	-0.00286688	0.00430945
2.27762	0.00363927	-0.00818706	-0.00562864	0.0051117	-0.00675887	0.0133482	-0.00362548	0.0100804
2.34879	0.00436861	-0.00600512	-0.00800716	0.00379492	-0.0101702	0.011159	-0.00254781	0.0125652
2.41997	0	-0.000395502	-0.00268255	0.0037573	-0.00820098	0.011826	-0.00187456	0.00502511
2.49114	0.00814116	0.00825465	-0.00176881	0.00503891	-0.00991659	0.008763	0	0.00703743
2.56232	0.0115246	0.0108596	6.93976e-05	0.00284047	-0.00929831	0.00843033	-0.000237711	0.00785509
2.6335	0.000736794	0.0144275	-0.00368551	0	-0.00617207	0.00736417	-0.000733871	0.00904976
2.70467	-0.00497626	0.01313	-0.00796585	-0.00235465	-0.005272	0.00533488	0.00269857	0.00881882
2.77585	-0.00121612	0.0136949	-0.0138308	-0.00959854	-0.00348345	-0.00734956	0.0104489	0.00287487
2.84702	-0.00649372	0.00887961	-0.0117703	-0.0148427	0.00174131	-0.00629638	0.0160534	0.000654455
2.9182	-0.00984738	0.00668265	-0.0127237	-0.0179874	0.00467692	-0.00644405	0.0174055	-0.00057122
2.98938	-0.0172004	0	-0.00733053	-0.0231212	0.0076548	-0.0023652	0.0184281	-0.00546576
3.06055	-0.0149578	0.00336511	-0.00550389	-0.0239816	0.00863941	-0.000774065	0.0208619	-0.000555716
3.13173	-0.01663	0.00295959	-0.00934636	-0.0291219	0.012621	0.00567242	0.0210214	0.00381412
3.2029	-0.0171607	0.00559961	-0.0112746	-0.0299063	0.0194486	0.00522048	0.0215431	0.0066792
3.27408	-0.0145794	0.0145218	-9.91394e-06	-0.0178991	0.0291124	0.01599	0.0233443	0.0112343
3.34526	-0.00519233	0.0221748	0.00723717	-0.00410571	0.0279919	0.0269592	0.0243566	0.0244066
3.41643	0.00168966	0.025615	0.0165315	0.000673926	0.0347093	0.0397678	0.0276478	0.037623
3.48761	0.00935066	0.0413091	0.0295204	0.0115622	0.0447701	0.0516303	0.0261801	0.0414494
3.55878	0.0207486	0.0618852	0.0607617	0.0333994	0.0550796	0.0579981	0.0294075	0.044241
3.62996	0.0455364	0.0970832	0.106162	0.0613518	0.0684141	0.0623885	0.0361168	0.0486027
3.70114	0.061803	0.139816	0.157601	0.100075	0.0836624	0.0766974	0.0423524	0.0595016
3.77231	0.079207	0.190541	0.19796	0.13149	0.0978962	0.084778	0.0486788	0.0653745
3.84349	0.0953072	0.233053	0.248578	0.155041	0.102775	0.0836137	0.0606345	0.0747368
3.91466	0.115602	0.267573	0.281609	0.177141	0.110246	0.0877233	0.0663468	0.0922406
3.98584	0.130249	0.282277	0.296171	0.196343	0.120372	0.0856137	0.0745031	0.103057
4.05702	0.141232	0.287762	0.300602	0.204484	0.125852	0.0812111	0.0832226	0.112355
4.12819	0.143512	0.283144	0.292282	0.211089	0.118379	0.0749107	0.0871369	0.117636
4.19937	0.142107	0.258869	0.270815	0.198463	0.0985128	0.0734234	0.0904002	0.121686
4.27054	0.134881	0.227814	0.239315	0.179372	0.0826786	0.0715994	0.092589	0.11937
4.34172	0.119704	0.202185	0.208681	0.155281	0.0671817	0.0695791	0.0882728	0.106679
4.4129	0.100358	0.173776	0.19067	0.138659	0.0532537	0.0597953	0.0837156	0.0931293
4.48407	0.08896	0.159751	0.171194	0.12574	0.0430081	0.0574366	0.0796482	0.0820884
4.55525	0.0705526	0.151916	0.155299	0.116436	0.0347707	0.0487969	0.0722002	0.0707799
4.62642	0.0572183	0.145265	0.141223	0.101935	0.0298103	0.0409216	0.0650529	0.0645764
4.6976	0.048813	0.134842	0.13877	0.089148	0.0249759	0.03254	0.0666196	0.0665667
4.76878	0.0452416	0.120466	0.132642	0.0851044	0.0252925	0.032075	0.0584497	0.066641
4.83995	0.0441406	0.111166	0.1202	0.0865193	0.0269526	0.0245843	0.0552158	0.0625502
4.91113	0.046178	0.112338	0.108877	0.0762984	0.0312507	0.028784	0.0498355	0.0650171
4.9823	0.0491011	0.106293	0.102828	0.0773109	0.031138	0.0301983	0.0416703	0.0647454
5.05348	0.0535914	0.0983232	0.100336	0.0710125	0.0250488	0.0360606	0.0399051	0.0678512
5.12466	0.0536908	0.0958709	0.0949714	0.0682685	0.0242043	0.0381791	0.0410856	0.0705506
5.19583	0.0531146	0.0922363	0.0869411	0.0631266	0.0186497	0.0361709	0.0395916	0.0647323
5.26701	0.0488238	0.0790153	0.0852789	0.0541431	0.0153278	0.0296352	0.0309526	0.0559176
5.33818	0.0396966	0.0718454	0.0789529	0.0446558	0.0186314	0.0274858	0.0306567	0.0465291
5.40936	0.03151	0.0656634	0.0764199	0.0411896	0.0143996	0.0154781	0.0230898	0.0407207
5.48054	0.025532	0.0554437	0.0749122	0.0381619	0.0121245	0.0182368	0.021776	0.0366658
5.55171	0.0254426	0.0515755	0.0675899	0.0381521	0.00976161	0.0174716	0.0240502	0.0302078
5.62289	0.0237686	0.0465449	0.0588285	0.0366905	0.0136387	0.0176071	0.0182622	0.0234094
5.69406	0.0223108	0.0460201	0.0505958	0.0418987	0.0143697	0.0210896	0.0141541	0.0204831
5.76524	0.021555	0.0469955	0.0434817	0.0437152	0.0144385	0.0305723	0.0147851	0.0198801
5.83642	0.0169132	0.0427209	0.0378142	0.0522554	0.0173261	0.0344605	0.00984106	0.0172394
5.90759	0.0105643	0.0482229	0.034888	0.0496415	0.012122	0.0357985	0.0152167	0.0186218
5.97877	0.0043951	0.04861	0.0321278	0.0530357	0.00938782	0.0315419	0.0152534	0.0244947
6.04994	0.00110519	0.0455712	0.032155	0.0532892	0.00349505	0.0258265	0.0149686	0.018572
6.12112	-0.00430569	0.0380349	0.0282803	0.0377448	0.00018648	0.0216227	0.0131403	0.023584
6.1923	-0.00360698	0.0343945	0.0242768	0.0230893	-0.00218223	0.0196965	0.0172117	0.0254829
6.26347	-0.00399773	0.0296643	0.0200154	0.0183465	-0.0102398	0.0148663	0.0170306	0.0261668
6.33465	0.00509133	0.0216567	0.0180648	0.0102398	-0.0121809	0.0156452	0.0197252	0.0224302
6.40582	0.0191061	0.0185778	0.0129658	0.00569566	-0.00787111	0.0171365	0.0195218	0.0181224
6.477	0.0253515	0.0104049	0.0116894	-0.00169545	0.000131779	0.0186263	0.0100724	0.017543
6.54818	0.0313146	0.00799515	0.00993129	-0.00217554	-0.00449624	0.0233575	0.00265789	0.0128459
6.61935	0.028605	0.00398673	0.00608881	0.000197107	-0.00468935	0.0272116	0.0014478	0.0060174
6.69053	0.0282101	0.011316	0.00338974	0.000559424	-0.0029928	0.0307857	-0.00610469	0.00270269
6.7617	0.0242041	0.0159119	0.00300227	0.000512805	-0.00483771	0.0323095	-0.00760115	0.00437065
6.83288	0.0189083	0.0201431	0.000710499	0.00528018	-0.00819186	0.0324118	-0.00835178	0.00574729
6.90406	0.0120619	0.023907	-0.00136399	0.00450974	-0.0151894	0.0286177	-0.0085145	0.00553757
6.97523	0.00236023	0.0290853	-0.00877466	0.00124071	-0.0204664	0.0319931	-0.0107584	0.0124706
7.04641	0.00729178	0.0290819	-0.0065969	-0.00336718	-0.0214179	0.0332215	-0.0112147	0.013391

## Sheet: Figure 4B-C
Direction (deg)	PSP	Calcium	Spikes		Dispersion
0	0.45254	0.316863	0.19214		PSP	Calcium	Spikes
45	0.537084	0.355245	0.242847		2.58411	1.36179	1.55807
90	0.719018	0.439371	0.465088		2.60061	1.37056	1.76735
135	0.937473	0.747334	0.748341		3.46452	2.40581	1.1351
180	1	0.999182	0.999695		2.19195	1.57373	1.32377
225	0.871501	0.783873	0.83253		2.17418	1.31445	0.831266
270	0.661008	0.534736	0.541439
315	0.523836	0.320215	0.290366	AVG	2.60307	1.60527	1.32311
360	0.45254	0.316863	0.19214	SEM	0.234033	0.205036	0.162759

## Sheet: Figure 4D
	ROI 1									ROI 2									ROI 3									ROI 4
	Direction									Direction									Direction									Direction
Time	0	45	90	135	180	225	270	315		0	45	90	135	180	225	270	315		0	45	90	135	180	225	270	315		0	45	90	135	180	225	270	315
-1.41e-05	0.414925	0.0928952	-0.087393	-0.259561	-0.218223	-0.223089	-0.147741	0.0207723		0.0923084	0.318705	0.213293	-0.271229	-0.12998	-0.147936	-0.134213	0.258543		-0.170682	-0.00796255	0.0862459	0.10341	0.0279003	0.00549785	0.27293	0.00464324		0.0222278	-0.029097	0.216682	-0.198564	-0.0493527	0.0695536	0.00270087	-0.0124448
0.0711619	0.349718	0.00456694	-0.106957	-0.256041	-0.259349	-0.2426	-0.130219	0.0978344		0.161608	0.322047	0.211481	-0.199188	-0.102029	-0.11521	-0.0574546	0.242086		-0.160767	-0.0342972	0.112583	0.0840477	-0.00326678	-0.0402304	0.272885	-0.0177941		0.0345976	-0.0301727	0.213835	-0.198112	-0.0734571	0.0334747	-0.0411363	0.0460319
0.142338	0.374102	-0.0541279	-0.0888026	-0.223201	-0.303593	-0.31025	-0.0188655	0.0682417		0.167334	0.276729	0.185829	-0.166154	-0.0239486	-0.030391	-0.0401586	0.232133		-0.169966	-0.0362087	0.138103	0.158644	-0.0472998	-0.0814565	0.217267	-0.0332225		0.0407402	0.0154566	0.173605	-0.1747	-0.0479308	-0.0516888	-0.0750227	0.0759742
0.213514	0.354133	0.0736561	-0.0961061	-0.159989	-0.291669	-0.269101	0.0319104	0.0918954		0.153941	0.232838	0.168643	-0.19283	0.029972	-0.0318442	-0.0519534	0.214491		-0.0994878	-0.0574986	0.0851435	0.133127	-0.0317041	-0.116221	0.202972	0.00450378		-0.0195665	0.0178338	0.155767	-0.220688	-0.0262005	-0.0314823	-0.0617909	0.0717569
0.28469	0.288113	0.105124	-0.0706044	-0.163087	-0.251082	-0.245196	0.104931	0.0234177		0.242114	0.203297	0.155346	-0.132829	0.0698437	-0.0198501	-0.0290525	0.231902		-0.0762364	-0.0117	0.094023	0.198648	-0.0241021	-0.0753935	0.127613	0.0645778		-0.0353447	0.0164575	0.125907	-0.213017	-0.0167552	-0.0467848	-0.122497	0.0749699
0.355866	0.233888	0.075326	-0.000413053	-0.199297	-0.297525	-0.265562	0.15872	0.063892		0.187646	0.201062	0.108697	-0.106693	0.181432	0.00740474	-0.0843353	0.165987		-0.0371623	-0.0136896	0.05949	0.221863	-0.0221669	-0.0305778	0.125669	0.095474		-0.0458762	0.0205848	0.0699611	-0.165843	-0.0166372	0.00157409	-0.163055	0.110899
0.427042	0.244679	0.0649877	0.0326891	-0.181454	-0.35445	-0.195758	0.198298	0.0987041		0.207106	0.100476	0.138564	-0.0584312	0.176177	0.0152108	-0.111489	0.109307		-0.00939762	-0.0194649	0.0423778	0.203442	0.0695187	-0.0521039	0.122721	0.0616825		-0.0557699	0.0175842	-0.000334783	-0.109988	0.0406758	-0.0330677	-0.14274	0.152574
0.498218	0.250789	0.0538265	0.0709945	-0.189078	-0.317155	-0.209961	0.227332	0.152032		0.192519	-0.0288388	0.152265	-0.0357916	0.248032	0.0092911	-0.0605486	0.117217		0.0782596	-0.0449306	0.0846271	0.15625	0.0864923	-0.0320218	0.153537	0.0564582		-0.0639686	0.0921948	0.000803263	-0.0629318	0.0927241	-0.0208475	-0.171913	0.137995
0.569394	0.280799	0.0952421	0.0624006	-0.161423	-0.32813	-0.213436	0.269578	0.156628		0.175243	-0.105028	0.0802271	-0.10045	0.2642	0.0389426	-0.0358966	0.0389958		0.102582	0.0202762	0.0830346	0.163563	0.141197	-0.0402821	0.170578	0.0470404		-0.0775486	0.110541	0.00383787	-0.0729233	0.141552	-0.000919215	-0.15224	0.115672
0.64057	0.20014	0.136525	0.062153	-0.14102	-0.32398	-0.236707	0.242892	0.188024		0.181125	-0.15584	0.0541336	-0.0832418	0.251771	0.00534926	0.0240838	0.0215452		0.0919355	0.0712269	0.0897721	0.145654	0.163621	-0.0693369	0.174926	-0.00449562		-0.0851043	0.127238	-0.0446601	-0.107574	0.146856	0.0146449	-0.165468	0.127622
0.711746	0.156259	0.151363	0.0835132	-0.161752	-0.313056	-0.257228	0.155594	0.180952		0.122563	-0.11967	0.0772233	-0.112425	0.221686	0.0452148	-0.036172	0.0837473		0.0949714	0.0256087	0.0952659	0.230574	0.183477	-0.0917711	0.118506	-0.0243714		-0.10623	0.102865	-0.0803464	-0.0272828	0.156158	0.0227406	-0.14175	0.122027
0.782922	-0.00075945	0.0992542	0.0961929	-0.165178	-0.242866	-0.310265	0.120097	0.201112		0.106692	-0.0152092	0.0490478	-0.0728697	0.201134	0.0173711	0.0210533	0.0911882		0.074992	0.0914539	0.114369	0.295653	0.127291	-0.158426	0.0623686	-0.00343087		-0.114362	0.0946718	-0.0749723	-0.0051866	0.118722	0.022809	-0.134451	0.095207
0.854098	0.0428403	0.0477696	0.0526418	-0.137001	-0.177112	-0.272521	0.112612	0.207449		0.139603	0.0119086	0.015194	-0.0463768	0.113901	0.0556167	0.011326	0.0956117		0.0832237	0.13402	0.0844636	0.317387	0.108395	-0.188865	0.0481089	-0.00419172		-0.130325	0.0339989	-0.11549	-0.00408068	0.113768	0.0859758	-0.0725103	0.0698977
0.925274	0.014568	0.0909375	0.0272247	-0.134127	-0.132347	-0.237066	0.0307295	0.224632		0.19193	0.000956644	0.0499592	-0.0366201	0.0669972	0.0855443	0.0160441	0.195113		0.0702613	0.0907051	0.0937595	0.303973	0.0649131	-0.125243	0.0219508	0.0207507		-0.14105	0.0446297	-0.083501	-0.0380796	0.0947987	0.0642983	-0.0632283	0.0648259
0.99645	0.0377737	0.142711	-0.0158826	-0.172009	-0.052033	-0.161432	-0.0179486	0.211488		0.312599	0.00955433	0.057073	-0.0656569	-0.0556781	0.0751062	0.0616216	0.26497		-0.0340824	0.125361	0.126934	0.286723	0.0247732	-0.148854	0.0286264	0.00780706		-0.180532	-0.0220731	-0.0295504	-0.0414662	0.083557	0.0739349	0.0172566	0.0416026
1.06763	-0.00966086	0.148053	-0.0345889	-0.193481	0.00543162	-0.104522	-0.131224	0.208591		0.309323	0.0828364	0.0595105	-0.0464263	-0.14123	0.106293	0.060584	0.237754		-0.0238165	0.076357	0.121246	0.223955	0.0511647	-0.11346	0.0475622	-0.0234815		-0.210506	-0.00483352	-0.0647068	-0.0225482	0.088441	0.0860578	0.0559259	0.0536356
1.1388	-0.0496427	0.154105	-0.0332078	-0.19756	0.0931174	-0.0449803	-0.230893	0.173709		0.403806	0.0601959	0.0554893	-0.0622601	-0.234758	0.0756627	0.00796676	0.262337		-0.01915	0.109924	0.107561	0.227498	0.0476103	-0.0960371	0.0190907	0.0365757		-0.233719	-0.0707249	-0.0564447	0.0124522	0.0564016	0.0953499	0.0327255	0.0251928
1.20998	-0.0695857	0.202223	-0.119239	-0.158963	0.122424	-0.0173434	-0.220235	0.113064		0.423325	0.0238217	0.000211859	-0.0569006	-0.322241	0.0356153	-0.011985	0.285568		0.0152323	0.145752	0.0858136	0.119166	0.0131786	-0.0247121	0.0421199	0.0722209		-0.242749	-0.126988	-0.037409	0.00112822	0.0319269	0.0900563	0.0413019	-0.0224962
1.28115	-0.0640081	0.208914	-0.118007	-0.135545	0.110677	0.00777662	-0.197073	0.0940508		0.437825	-0.0315897	0.00575335	-0.010362	-0.343206	0.0326824	-0.0359566	0.315833		0.0300477	0.124647	0.0555936	0.103276	-0.00112145	0.0139333	0.0338232	0.119068		-0.281976	-0.107629	-0.013316	-0.00426054	0.0221316	0.0488913	0.0526639	-0.0869654
1.35233	-0.0673738	0.130233	-0.135892	-0.0805	0.140926	0.0254453	-0.176495	0.101603		0.528216	-0.0462484	-0.0586444	0.0567071	-0.288412	0.0250697	0.0049425	0.312798		0.0137802	0.0913171	0.0759838	0.0538582	-0.0452635	-0.00103831	0.0240492	0.0913582		-0.282184	-0.114204	-0.0077487	-0.0563526	-0.0279342	0.0305853	0.00921589	-0.0441692
1.42351	-0.0687116	0.117401	-0.103035	-0.0491959	0.124982	0.0160903	-0.0688901	0.0292398		0.551716	-0.0476703	-0.108045	0.0585562	-0.243367	0.0726459	-0.0286369	0.355421		0.0643749	0.140741	0.0529811	0.0576777	-0.0642927	-0.0280808	-0.01752	0.0526265		-0.286119	-0.0891585	0.011631	-0.0585676	0.0143658	0.024152	0.0187881	-0.035621
1.49468	-0.0992066	0.061368	-0.0942075	-0.00285584	0.14702	0.0712115	-0.0684677	0.0421253		0.560876	-0.116571	-0.104912	0.0102256	-0.166865	0.055044	-0.0598548	0.401012		0.11996	0.121268	0.0206405	-0.00787697	-0.0170272	0.0114269	0.0435335	0.10922		-0.287538	-0.0863392	0.00334495	-0.134661	-0.0115563	0.0467342	0.030224	-8.25924e-05
1.56586	-0.0820362	0.0360411	-0.0661866	-0.0413807	0.117355	0.0629397	0.0157871	0.00384818		0.506608	-0.108603	-0.0668212	0.103908	-0.125992	0.0261142	-0.0618692	0.396129		0.0926727	0.102353	0.0649205	0	0.0156414	0.0597137	0.0436479	0.142145		-0.266266	-0.0932859	0.0100284	-0.136116	0.00218965	0.0146167	-0.000920159	0.0184674
1.63703	-0.0458928	-0.0146592	-0.0253227	-0.103605	0	-0.0288126	0.103914	0.0470441		0.422264	-0.164819	-0.119837	0.07348	-0.0359068	-0.0144424	-0.118717	0.343649		0.100696	0.116549	0.0341828	-0.0277797	0.0226657	-0.0111081	0.0635749	0.120412		-0.239896	-0.131187	0.0478676	-0.109849	0.0299495	0.018312	-0.0597721	0
1.70821	-0.00737899	0.00490049	-0.00798108	-0.0462625	-0.0472342	0	0.111004	0.0235838		0.382543	-0.205665	-0.0384464	0.114145	-0.0546779	-0.0530648	-0.120961	0.293824		0.174127	0.0709271	0.0518694	-0.0499004	0.0279121	-0.0357813	0.0144361	0.120294		-0.197312	-0.0727566	0.0368261	-0.0884834	0.0125628	-0.00133244	-0.037026	0.0530321
1.77939	0.0133693	0.00866011	-0.00680547	-0.0374575	-0.0608122	-0.0841668	0.130917	0.00670229		0.281573	-0.19782	-0.0602373	0.074159	0.0281559	-0.0458557	-0.0763332	0.221242		0.184854	0.0536779	0.0840673	-0.0655993	0.0332193	-0.0468321	0.088818	0.0763664		-0.151633	-0.0158572	0.0464404	-0.073171	0.0543024	0.0429083	-0.0735292	-0.0198729
1.85056	-0.0648805	0	-0.077016	0.0213532	-0.19462	-0.120248	0.143353	-0.0393261		0.115471	-0.166534	-0.0660633	0	0.0409974	-0.0215454	-0.0661731	0.126864		0.0903814	0.0683674	0.0322165	-0.0223726	0.074308	-0.0851268	0.0986978	0.048485		-0.100373	0	0.0330655	-0.0767614	0.0418828	0.0135682	-0.0485664	-0.0257536
1.92174	-0.033257	0.0011876	-0.0212743	0.0115373	-0.235509	-0.151703	0.105756	-0.0234524		-0.00977154	-0.173518	0	0.00985818	0.0617158	0.00813502	-0.0856024	0.0497735		0.0755646	0.0587814	0.0236151	-0.00997801	0.0968121	-0.145963	0.0832181	0		-0.0713028	0.0160398	-0.0352898	-0.073176	0.013709	0	-0.0657948	-0.0115195
1.99291	0.0345489	-0.0599715	0.00309019	0.0214569	-0.213576	-0.173614	0.0803558	-0.00592817		-0.100419	-0.0819787	0.0421248	-0.0278767	0.143467	-0.0143098	-0.107711	0.00447071		0.0617978	0.0300735	-0.0106533	0.113626	0.0827206	-0.129914	0.0795512	0.0291833		-0.0620905	0.0464824	-0.0214412	0.0208775	0.0487045	0.0352894	-0.0430444	0.0309127
2.06409	0	-0.096735	0.0455154	0.0234863	-0.100754	-0.120696	0.097493	0.0412462		-0.119188	-0.0103273	0.0291631	-0.00702696	0.180673	-0.0195285	-0.0364841	-0.0583131		0.0520763	0.0398717	0	0.109986	0.046619	-0.125818	0	0.0307545		-0.046598	0.0627623	-0.0377745	0.0351391	0.0081955	0.00654558	-0.0128865	0.0117308
2.13527	0.0588514	-0.13086	0.0428704	0.034495	-0.106397	-0.0223769	0.0797923	-0.0492817		-0.0837464	0	0.093143	-0.0587855	0.103137	-0.0351015	0	-0.0628876		0	0	-0.0263524	0.0886298	0.0293727	-0.0615004	-0.0195904	-0.028056		0.00600527	0.0357955	-0.073539	0.0781351	-0.0136448	0.0319214	0.0248856	0.0355877
2.20644	-0.00912369	-0.0734812	0.0247882	-0.00410448	-0.052027	0.00114554	0	-0.030713		-0.0095174	0.049095	0.127406	-0.0595205	0.118707	0.0108198	0.0530077	-0.107603		-0.060039	-0.0307597	0.0138723	0.100491	0	-0.0388664	-0.0531344	-0.0242639		0.0274061	0.0180632	-0.0503784	0.0776509	0	-0.0178467	-0.00106815	0.0170723
2.27762	0.00354733	0.0396462	0	-0.0486249	-0.00748231	0.0316825	-0.00208519	-0.0409191		0.00988691	0.115829	0.138518	-0.0483163	0.0621913	0.0201955	0.109684	-0.116213		-0.0960027	-0.00335729	0.0244447	0.0844807	-0.0577308	0	-0.0666269	-0.0301914		0.0474408	-0.0115947	-0.0111355	0.0822166	-0.00826695	-0.0158443	0.0137719	-0.0146804
2.34879	0.0124549	0.0759839	-0.0064978	0	0.0979556	0.052985	-0.0624284	-0.0444615		-0.0586625	0.14839	0.149328	-0.0716325	0.0602331	0.01505	0.0816121	-0.168813		-0.0875998	-0.0399902	-0.0251204	0.0709235	-0.0481688	0.0541422	-0.0758719	-0.0688638		0.0505025	-0.018889	-0.013674	0.0830714	0.0168133	-0.0104559	0	-0.0155672
2.41997	0.0114035	0.0605947	0.00392951	0.054021	0.122283	0.0516898	-0.0873472	-0.0305894		-0.0136565	0.115702	0.138848	-0.0868552	0	-0.012389	0.0797043	-0.142346		-0.0553556	-0.0807652	-0.0405022	0.0980017	-0.141001	0.0854833	-0.0560707	0.00501588		0.11059	-0.0437275	-0.010607	0.125881	-0.0268085	-0.0260854	0.000707563	0.00357129
2.49115	0.0143922	0.0118776	0.00174124	0.0456336	0.181784	0.0351786	-0.0608623	0		0.0192201	0.0768417	0.112359	-0.0283136	-0.0248148	0	0.107225	-0.150666		-0.0679181	-0.0468917	-0.0260709	0.00767707	-0.199904	0.128005	-0.0609556	-0.0295921		0.0966925	-0.023528	-0.0116328	0.104643	-0.0326462	-0.0363843	0.0389442	-0.0279196
2.56232	0.0391742	-0.00800478	0.0456837	0.0065535	0.212197	0.0469154	-0.105285	0.0281624		0.0094765	0.0696825	0.0673231	0.0112983	-0.0687472	-0.0278326	0.174019	-0.138168		-0.0883545	-0.077644	-0.0734951	0.0260486	-0.225354	0.11909	-0.044531	-0.0504073		0.0853665	0.0297702	0.00315213	0.0483257	-0.0384186	-0.0177667	0.0477813	-0.0625738
2.6335	0.0122459	-0.0334633	0.00517999	0.0171711	0.318079	0.032701	-0.115745	0.032017		0	0.0601531	-0.021534	0.0291834	-0.0290376	0.00691287	0.177228	-0.110711		-0.13519	-0.0959187	-0.0548813	-0.00138411	-0.293651	0.0993534	-0.0736519	-0.0811798		0.0758715	0.0433521	0	0	-0.0721063	0.011348	0.0191569	-0.0241168
2.70467	-0.0174659	-0.0836707	0.00918343	-0.0495274	0.327623	-0.0141757	-0.0474976	-0.0234961		-0.0565484	0.0532101	-0.00695356	0.00624452	-0.0510929	0.045524	0.180914	0		-0.107371	-0.0199814	-0.0595794	-0.0362409	-0.278683	0.0429102	-0.00492408	-0.0593379		0.0475819	0.0778328	0.0524272	-0.00834154	-0.0550807	-0.0381565	0.0406508	0.000706507
2.77585	-0.0341788	-0.157023	-0.0203969	-0.141637	0.338872	-0.0319919	-0.11809	0.0264731		-0.012522	0.00961736	-0.0110406	-0.0243067	-0.0702243	0.044498	0.185033	0.0581546		-0.131594	-0.00708542	-0.0385103	-0.0679236	-0.267687	0.0375882	0.0465485	-0.0218485		0	0.0872402	0.00359995	-0.101181	-0.0606	-0.0487006	0.0353816	0.0473402
2.84703	-0.0442557	-0.0507546	-0.0492414	-0.221274	0.321831	-0.101877	-0.020391	0.0120587		-0.0308313	0.0223875	-0.0194561	0.0330947	-0.0997316	0.0325216	0.158524	0.0720305		-0.147888	-0.0481174	-0.0561579	-0.060278	-0.229212	-0.0627409	0.0609641	-0.0321518		-0.0453144	0.0876069	0.0203432	-0.0864339	-0.0229729	-0.0735494	0.0218716	0.0532565
2.9182	-0.030545	-0.0649562	-0.0682985	-0.275045	0.242438	-0.0884972	0.0327908	0.0374552		-0.0457459	-0.0346893	-0.0395708	-0.0343841	-0.188664	0.0282083	0.158447	0.0500668		-0.15898	-0.0174031	-0.117313	-0.0565656	-0.287539	-0.106236	0.0795477	-0.00335471		-0.064476	0.0698458	0.00754528	-0.132797	0.00242416	-0.099495	-0.0313674	0.0548684
2.98938	0.0231504	-0.068031	-0.122762	-0.228494	0.240626	-0.0529481	0.024562	0.0330764		-0.0460026	-0.00269273	0.00395098	-0.0808694	-0.224508	0.0594065	0.147551	0.0640274		-0.167985	-0.0488006	-0.152039	-0.0830094	-0.30022	-0.0962608	0.032967	0.0233819		-0.0801739	0.12348	-0.122994	-0.176112	-0.0381133	-0.0959892	-0.0152542	0.057117
3.06055	-0.00141658	-0.0361107	-0.128989	-0.169633	0.181607	-0.0726753	0.0760381	0.049617		-0.00403222	-0.0075677	-0.0434845	-0.061094	-0.325151	0.0808738	0.133214	0.113689		-0.244719	-0.0827474	-0.186668	-0.0679794	-0.248137	-0.105548	0.122047	-0.031655		-0.0822302	0.137752	-0.130195	-0.133202	0.0222932	-0.0848175	-0.0312577	0.00294895
3.13173	-0.0408724	-0.111053	-0.175286	-0.059284	0.154931	-0.0266116	0.0776009	0.0365433		0.0173717	0.0139219	-0.0182806	-0.0386282	-0.330222	0.064616	0.0928149	0.166648		-0.271482	-0.0257361	-0.189054	-0.0482162	-0.172051	-0.149639	0.104758	-0.0187911		-0.090746	0.102885	-0.0917921	-0.150553	0.0325765	-0.0942205	-0.0135888	0.0128397
3.20291	0.0851178	-0.0943487	-0.0726461	-0.033011	0.136975	0.00667317	0.0715213	0.038614		0.0823072	0.0363754	0.0449704	-0.0390604	-0.292348	-0.0204577	0.0732512	0.160248		-0.236644	0.0182422	-0.220376	-0.0594954	-0.164485	-0.163531	0.123846	-0.00668767		-0.109356	0.0904647	-0.044601	-0.165482	0.0212316	-0.071321	-0.0255648	-0.0179859
3.27408	0.161262	-0.0461584	-0.0763931	0.00906617	0.129364	0.0747762	0.121527	0.0739111		0.189604	-0.0298872	0.067617	-0.0674168	-0.213908	-0.0527517	0.114821	0.183254		-0.235093	-0.0346678	-0.179991	0.0387573	-0.0986456	-0.0963726	0.109567	-0.0266941		-0.158828	0.0368113	-0.0441002	-0.107886	0.01892	-0.0324883	-0.0358817	-0.0486413
3.34526	0.210985	-0.0426141	-0.122082	0.0718183	0.135664	0.150504	0.128714	0.130314		0.206133	0.00217146	0.0760568	-0.10018	-0.218095	-0.119899	0.165427	0.198998		-0.238189	-0.0737375	-0.056587	0.0399181	-0.0545955	-0.103405	0.0603956	-0.074071		-0.187451	0.0780147	0.0227158	-0.0395073	-0.00265655	-0.0349392	-0.0372042	-0.113265
3.41643	0.253681	0.0165641	-0.140582	0.0959047	0.0764484	0.133751	0.0906851	0.167126		0.267495	0.00155867	0.184849	0.0489435	-0.179779	-0.0736435	0.192935	0.219111		-0.197954	-0.0153247	0.0533932	0.134395	-0.0328234	-0.0815248	0.0576231	-0.166531		-0.174964	0.0326704	0.180992	0.0585778	0.0279698	-0.100302	-0.0315075	-0.14908
3.48761	0.325553	-0.00166328	-0.0778647	0.197271	0.109617	0.145338	0.0179316	0.277409		0.296325	0.0677497	0.21109	0.207548	-0.0364534	-0.00948701	0.146798	0.241053		-0.0715257	0.0259921	0.237716	0.194766	0.0359992	-0.0809356	0.0467795	-0.136649		-0.151145	0.125939	0.293045	0.0711747	0.0824156	-0.0686132	-0.032178	-0.183502
3.55879	0.49962	0.102917	0.00292849	0.229775	0.0916243	0.124181	0.0740173	0.370215		0.346864	0.138174	0.248472	0.397983	0.0229052	0.0176934	0.17999	0.264692		0.0214835	0.179821	0.311654	0.31929	0.0853014	0.0434994	0.112156	-0.134818		-0.110873	0.155146	0.535471	0.112775	0.0610988	0.00933549	-0.0155628	-0.15343
3.62996	0.454547	0.174262	0.152468	0.371301	0.12616	0.133721	0.111815	0.414716		0.429449	0.125607	0.359401	0.475674	0.0824639	0.0448579	0.191825	0.303242		0.0742869	0.32945	0.486789	0.469059	0.181639	0.0573368	0.106827	-0.0919093		-0.0560297	0.27633	0.693123	0.252101	0.0557991	0.0782838	0.0361562	-0.121778
3.70114	0.506728	0.219633	0.300536	0.390193	0.0873051	0.110208	0.131697	0.506818		0.427514	0.143721	0.446352	0.564581	0.149204	0.104069	0.250744	0.343902		0.175681	0.385705	0.609191	0.647371	0.234378	0.163501	0.111728	-0.0111865		0.0354882	0.451921	0.819391	0.3742	0.0545211	0.116028	0.0638953	-0.0875741
3.77231	0.564677	0.323978	0.390006	0.403429	0.0580963	0.0895082	0.210228	0.587186		0.502637	0.104525	0.552495	0.759422	0.23302	0.144387	0.290056	0.37581		0.168691	0.50462	0.774903	0.76918	0.282098	0.220734	0.103048	0.0691845		0.106728	0.578381	1.0155	0.404193	0.0774861	0.167432	0.132035	-0.0704584
3.84349	0.613013	0.363564	0.490928	0.465516	0.00947638	0.0951452	0.282089	0.65567		0.545283	0.127805	0.622578	0.87946	0.25817	0.203096	0.31276	0.388196		0.190427	0.604439	0.870304	0.907531	0.193085	0.249584	0.146556	0.154473		0.201982	0.737731	1.16503	0.492465	0.123518	0.248129	0.153443	-0.00488523
3.91467	0.651853	0.493401	0.534446	0.531448	0.0119305	0.0714342	0.348489	0.752805		0.536801	0.130581	0.650023	0.948585	0.312325	0.259407	0.34028	0.488967		0.31933	0.717356	0.979821	0.955974	0.255169	0.248011	0.175831	0.253775		0.294658	0.813201	1.23603	0.530636	0.112593	0.294852	0.173393	0.0544715
3.98584	0.671972	0.619475	0.555142	0.469504	-0.0472247	-0.0559119	0.324918	0.76213		0.54797	0.23886	0.698808	0.991702	0.389843	0.239505	0.405741	0.530554		0.323319	0.80008	1.07715	0.963973	0.330566	0.266607	0.239507	0.305221		0.39448	0.900458	1.32798	0.558542	0.126374	0.287399	0.281727	0.152091
4.05702	0.59821	0.701055	0.59378	0.445576	-0.0477066	-0.0928588	0.355152	0.812878		0.614964	0.247242	0.690671	0.994638	0.420063	0.266227	0.38269	0.482483		0.366849	0.843338	1.09437	0.97133	0.350314	0.272068	0.24987	0.32362		0.46682	0.938092	1.33015	0.54598	0.201927	0.32822	0.316484	0.243404
4.12819	0.597685	0.77764	0.67309	0.451621	0.00201304	-0.170174	0.5199	0.729793		0.58266	0.320649	0.66674	0.972717	0.357573	0.243751	0.403726	0.455188		0.382445	0.795981	1.04738	0.909705	0.419119	0.261353	0.320668	0.370226		0.553083	0.957073	1.27672	0.563521	0.272073	0.344334	0.355969	0.294973
4.19937	0.600933	0.817022	0.655597	0.440966	0.0672416	-0.142982	0.568982	0.769891		0.54432	0.379935	0.617705	0.812737	0.33498	0.159386	0.433297	0.396767		0.335011	0.823583	0.940496	0.866829	0.397924	0.314997	0.284824	0.38939		0.587148	0.956435	1.18683	0.496388	0.304621	0.318051	0.379349	0.346033
4.27055	0.556319	0.802023	0.615696	0.458755	0.113044	-0.234064	0.647538	0.707301		0.506692	0.439097	0.574656	0.706021	0.291242	0.129923	0.432539	0.44817		0.308817	0.782687	0.840529	0.791876	0.359592	0.27392	0.252936	0.363567		0.638274	1.00994	1.09185	0.473453	0.30637	0.33545	0.438739	0.367682
4.34172	0.499109	0.819541	0.599976	0.484003	0.13834	-0.212946	0.638939	0.617265		0.489691	0.369428	0.555538	0.677646	0.218702	0.0435179	0.436619	0.456451		0.236636	0.663639	0.768883	0.717993	0.352057	0.255789	0.289327	0.335141		0.632883	0.975139	1.05551	0.449204	0.321946	0.298066	0.457781	0.38143
4.4129	0.444611	0.755231	0.518896	0.443279	0.18731	-0.224773	0.617073	0.584779		0.38737	0.436348	0.518376	0.524806	0.276577	-0.036727	0.407051	0.44951		0.198386	0.639403	0.677626	0.596262	0.369816	0.184184	0.327366	0.271573		0.583177	0.898351	0.954791	0.365193	0.361504	0.280156	0.476515	0.374644
4.48407	0.385351	0.708359	0.537145	0.418367	0.178174	-0.229453	0.580486	0.533406		0.328645	0.454271	0.485871	0.366356	0.246301	-0.074564	0.434892	0.383525		0.136906	0.572694	0.512743	0.518792	0.322537	0.130272	0.424149	0.25905		0.517928	0.842515	0.867164	0.32245	0.353207	0.257803	0.445916	0.336071
4.55525	0.291304	0.690013	0.433205	0.354973	0.172761	-0.216358	0.475243	0.538503		0.17246	0.431437	0.45094	0.212607	0.222826	-0.0742849	0.426341	0.310003		0.105759	0.422248	0.414702	0.453292	0.280818	0.00983138	0.458026	0.196603		0.423042	0.798528	0.750024	0.334468	0.326681	0.232842	0.374143	0.357981
4.62643	0.326783	0.578264	0.328993	0.304059	0.160908	-0.252376	0.390063	0.502572		0.0795689	0.489103	0.402064	0.172739	0.172064	-0.134477	0.42875	0.275938		0.0822405	0.381754	0.441705	0.345475	0.221637	-0.0262368	0.480931	0.145673		0.312145	0.807896	0.681536	0.367465	0.370681	0.190569	0.396297	0.356475
4.6976	0.33054	0.538235	0.280036	0.290482	0.189526	-0.284009	0.29559	0.450156		0.117125	0.497856	0.34531	0.206107	0.19738	-0.090338	0.369769	0.326795		0.0673014	0.408142	0.398707	0.241668	0.135531	-0.0584142	0.431102	0.137121		0.284488	0.772512	0.674338	0.338103	0.352679	0.109965	0.397133	0.369776
4.76878	0.33629	0.378118	0.322162	0.316118	0.212654	-0.236025	0.256812	0.493593		0.103348	0.517299	0.178358	0.22522	0.174205	-0.0955664	0.320624	0.302748		0.0539916	0.439841	0.370778	0.226453	0.154923	-0.0581179	0.397322	0.155186		0.270323	0.808552	0.604892	0.319365	0.312744	0.126942	0.354626	0.359274
4.83995	0.251231	0.2877	0.319947	0.224544	0.176249	-0.257287	0.285164	0.5264		0.160623	0.455473	0.15998	0.30915	0.0821491	-0.0725006	0.335269	0.33233		-0.00519953	0.48367	0.330901	0.221039	0.105819	-0.0714723	0.383151	0.110318		0.254931	0.729097	0.641674	0.327981	0.283953	0.127047	0.340761	0.35977
4.91113	0.10621	0.219295	0.373289	0.225283	0.152083	-0.159858	0.213629	0.487691		0.19239	0.329996	0.231238	0.272889	0.0298774	-0.0305549	0.268757	0.372744		-0.0711781	0.448747	0.403701	0.166206	0.082299	-0.138878	0.3148	0.112174		0.251909	0.77035	0.623207	0.388701	0.308468	0.057751	0.330749	0.33955
4.98231	0.160121	0.122458	0.367416	0.171037	0.122038	-0.0931098	0.173166	0.5038		0.25092	0.300924	0.262764	0.258266	0.05846	-0.0271827	0.189732	0.3517		-0.126432	0.399865	0.372605	0.228053	0.0585999	-0.018111	0.294279	0.186879		0.241593	0.752918	0.618324	0.414568	0.311761	0.0776336	0.270407	0.324493
5.05348	0.15845	0.123574	0.305018	0.189484	0.0363505	-0.0213064	0.133676	0.563763		0.329106	0.153168	0.274285	0.397959	0.0612195	0.00993474	0.199021	0.313878		-0.183294	0.384667	0.464138	0.211548	0.0310287	-0.0550296	0.302673	0.292052		0.265533	0.672584	0.64173	0.426168	0.261115	0.076417	0.267349	0.322224
5.12466	0.167526	-0.0106464	0.259952	0.198714	0.00641501	-0.00126869	0.0209062	0.618928		0.371068	0.105276	0.255483	0.476071	-0.00702935	0.073461	0.201251	0.275331		-0.201559	0.37985	0.419697	0.165878	-0.0726471	-0.0763522	0.336825	0.306959		0.294825	0.60896	0.648721	0.424944	0.293676	0.0820144	0.212004	0.351324
5.19583	0.115849	0.0682284	0.215649	0.16151	0.0258577	-0.010949	-0.0546267	0.672101		0.392987	0.0942482	0.169597	0.508375	-0.00930156	0.0916664	0.269947	0.28057		-0.159057	0.318835	0.445192	0.174505	0.0103528	-0.0389094	0.350757	0.352537		0.308368	0.451146	0.602621	0.398213	0.272373	0.0660956	0.187006	0.345449
5.26701	0.0106285	0.0430592	0.164577	0.0643945	0.0867108	-0.0832203	-0.187751	0.63603		0.497245	0.166418	0.155972	0.559005	0.0155019	0.0884525	0.244598	0.151918		-0.155372	0.311698	0.506105	0.158775	0.000855394	-0.0445301	0.306711	0.307282		0.349038	0.369723	0.55372	0.3724	0.297697	0.0926362	0.16085	0.395094
5.33819	-0.0343978	0.0148744	0.171604	0.0738131	0.183331	-0.038775	-0.154628	0.60239		0.555031	0.0963656	0.114948	0.522208	-0.0362221	0.116041	0.165503	0.0944479		-0.0842327	0.288469	0.480572	0.11994	-0.000192451	-0.049161	0.30545	0.320778		0.358197	0.292435	0.462656	0.314754	0.309775	0.0978147	0.123023	0.383432
5.40936	0.0302604	0.10901	0.127339	0.0578416	0.255815	-0.0947615	-0.0707074	0.559308		0.521943	0.0867933	0.0694935	0.492435	-0.0394845	0.0910528	0.183847	0.0971743		-0.129151	0.247951	0.462088	0.10794	0.0287868	-0.0353634	0.287105	0.316909		0.340992	0.23779	0.423727	0.289912	0.312191	0.140372	0.118818	0.354415
5.48054	0.0236732	0.162422	0.0681773	0.0949989	0.315099	-0.0970304	-0.0675448	0.58692		0.464156	0.0126351	0.024816	0.372577	-0.028965	0.0930251	0.15537	0.0611506		-0.0964755	0.254165	0.427898	0.155023	0.0445788	-0.0244512	0.210862	0.275142		0.323343	0.141116	0.436385	0.252943	0.266402	0.112008	0.134621	0.323224
5.55171	0.0265502	0.172663	0.0514828	0.0600134	0.297584	-0.135492	-0.0440796	0.555364		0.442399	0.0205446	0.0346153	0.317627	-0.0179647	0.0979948	0.1722	0.0810552		-0.111945	0.199727	0.395417	0.22374	0.0165127	-0.0738554	0.219594	0.244345		0.322443	0.126374	0.385749	0.2162	0.274801	0.0916045	0.0880276	0.291431
5.62289	0.0425104	0.221563	0.0162094	0.00102663	0.312808	-0.153833	-0.0270526	0.506753		0.378133	-0.000574435	0.0492669	0.254874	0.0295548	0.0905468	0.158393	0.0926165		-0.0602284	0.180807	0.404591	0.252403	0.064658	-0.0817473	0.229416	0.233918		0.258839	0.0904318	0.320073	0.133994	0.296296	0.0375584	0.00800251	0.274549
5.69407	0.0369376	0.277705	0.00694892	0.0121266	0.29477	-0.225494	0.0124324	0.526224		0.25618	0.124355	0.0137134	0.168362	0.0505121	0.0534515	0.12967	0.102079		-0.0209833	0.23939	0.350473	0.282338	0.0599387	-0.0875372	0.237801	0.16591		0.180838	0.0840845	0.306995	0.100027	0.353394	0.0726702	-0.029555	0.267683
5.76524	0.0415046	0.324506	0.0153707	0.0368148	0.278194	-0.266774	0.0435178	0.500877		0.254568	0.180482	0.0528693	0.0685516	0.0559763	0.0956119	0.145387	0.0870656		0.0128559	0.221216	0.260467	0.275051	0.0595391	-0.0713024	0.230714	0.201592		0.164429	0.14308	0.325178	0.072561	0.339252	0.104268	-0.102197	0.247043
5.83642	0.121863	0.430913	-0.0672141	-0.000418439	0.247471	-0.291522	0.00387352	0.448702		0.152985	0.219931	0.0621259	-0.0319308	0.0400555	0.0784316	0.0864712	0.0371004		0.0564689	0.24997	0.203822	0.285588	0.0643502	-0.0537776	0.180354	0.175144		0.113275	0.168872	0.275495	0.0900249	0.282714	0.148572	-0.112215	0.23857
5.90759	0.183869	0.48702	-0.0750136	-0.0469404	0.193854	-0.352816	0.133657	0.348997		0.201244	0.250231	0.0128745	-0.0578778	0.0467122	0.0698988	0.094058	0.0566332		0.092704	0.316914	0.257542	0.26608	0.0610516	0.0376031	0.106204	0.187067		0.0711053	0.154802	0.213503	0.0776106	0.263364	0.156772	-0.0804396	0.17068
5.97877	0.203331	0.508508	-0.113127	-0.00705447	0.145676	-0.304746	0.143876	0.380596		0.14915	0.260327	0.00715283	-0.0922335	0.0333382	0.0605982	-0.00838292	0.132931		0.0991748	0.326535	0.220623	0.26307	0.0263641	0.0255951	0.0469915	0.165547		0.0932749	0.2231	0.283032	0.00373848	0.223183	0.112671	-0.0813138	0.14049
6.04995	0.142569	0.425013	-0.124415	-5.40483e-05	0.121471	-0.290241	0.126438	0.406502		0.0918221	0.23662	-0.0231267	-0.0465055	0.0139332	0.0978196	0.0180268	0.188692		0.104367	0.278908	0.192289	0.327724	0.090829	-0.0320508	-0.0170297	0.101328		0.0917427	0.235774	0.259627	0.00931762	0.203259	0.0588161	-0.0674593	0.114853
6.12112	0.164281	0.360541	-0.15206	0.0388404	0.0760677	-0.261251	0.140914	0.374489		0.0579517	0.131609	0.0710157	-0.0620562	0.00382331	0.108795	0.0227841	0.203426		0.102716	0.240669	0.280841	0.27325	0.0415003	-0.0387879	-0.0596626	0.0197559		0.114058	0.2364	0.291874	0.000530496	0.194211	0.0530005	-0.051112	0.0799116
6.1923	0.169396	0.361686	-0.140454	0.0704895	0.0341875	-0.195537	0.0782692	0.329281		0.0303862	0.0531156	0.137238	-0.125247	0.0467552	0.124712	0.0384832	0.162521		0.0995125	0.193881	0.295846	0.216141	0.0550245	-0.0336729	-0.0438357	0.0299368		0.118929	0.260911	0.300174	0.0273284	0.12107	0.00939414	-0.0732072	0.0746017
6.26347	0.185099	0.328046	-0.168718	0.114797	0.0203275	-0.121702	0.0483437	0.354555		0.0761787	0.0301409	0.145967	-0.158396	0.0384981	0.132276	0.0761203	0.153672		0.118102	0.19917	0.289708	0.263872	0.212023	-0.0231813	-0.0589576	0.0676872		0.0975092	0.24307	0.253596	0.0225697	0.0270752	0.0443423	-0.0705976	0.0916515
6.33465	0.131531	0.287676	-0.196332	0.146881	0.00399677	-0.0952138	-0.055128	0.34513		-0.0208626	-0.0753685	0.176878	-0.0788798	0.0434554	0.151946	0.133149	0.151071		0.0842854	0.158302	0.275161	0.223216	0.297528	-0.098498	0.0162513	0.0519881		0.144925	0.258489	0.25626	0.0127893	0.000574428	0.0235327	-0.0564595	0.114043
6.40583	0.0494772	0.162087	-0.163337	0.258334	0.0351513	-0.0629041	-0.189386	0.338591		0.017315	-0.121383	0.224782	-0.0198239	0.0405991	0.19876	0.121158	0.197806		0.0395823	0.103414	0.213795	0.210927	0.326012	-0.0963272	0.0523699	0.00426442		0.096483	0.283679	0.286218	0.00177421	0.0422594	-0.00180633	-0.0342542	0.201878
6.477	0.00523677	0.114078	-0.136248	0.245952	0.0998983	-0.0150479	-0.208554	0.290074		-0.0264612	-0.138806	0.255855	-0.0140776	0.0360579	0.168221	0.158193	0.167847		0.0277592	0.0894325	0.230175	0.200868	0.367081	-0.0891219	0.112435	0.00582766		0.11184	0.255203	0.223287	0.00379281	0.00570431	0.036211	-0.0326227	0.202607
6.54818	0.0143552	0.0435088	-0.163792	0.277856	0.0968128	0.0147457	-0.266946	0.285509		0.0332067	-0.146609	0.245722	-0.0128642	0.0442097	0.14824	0.17529	0.137303		0.0871186	0.0807969	0.241502	0.139817	0.358529	-0.137246	0.110462	-0.0436081		0.112265	0.237478	0.175017	-0.0270082	-0.0680372	0.0709571	-0.0236199	0.238386
6.61935	0.0767565	0.0203962	-0.153911	0.325509	0.0413002	0.0807089	-0.27224	0.271878		0.00879698	-0.226179	0.24027	-0.0158281	0.0911333	0.114167	0.190001	0.145882		0.0304967	-0.0197896	0.201819	0.0625543	0.283464	-0.0904303	0.170384	-0.0239575		0.105772	0.223413	0.174692	-0.00171161	-0.118861	0.0501143	0.0405173	0.258507
6.69053	0.162057	0.00278601	-0.190078	0.393816	0.0337225	0.132754	-0.231226	0.252645		-0.0266437	-0.251164	0.258827	0.031551	0.136735	0.0652766	0.216883	0.15452		-0.0556908	-0.0132782	0.191839	0.0700982	0.240356	-0.0859825	0.198541	-0.0454542		0.0753284	0.197438	0.245515	0.0364719	-0.0728883	0.0865141	0.0580079	0.263954
6.76171	0.118704	-0.115099	-0.181179	0.409579	0.0179162	0.179156	-0.312786	0.203935		-0.0117963	-0.215227	0.269083	0.0713621	0.135725	0.0581657	0.218769	0.224794		-0.0777031	-0.0698899	0.0972433	0.0787469	0.25251	-0.138764	0.222279	-0.0399374		0.036079	0.169503	0.244023	0.0328047	-0.0624404	0.0617258	0.0900385	0.28717
6.83288	0.168611	-0.153224	-0.153079	0.367218	-0.0262376	0.218896	-0.303644	0.21433		-0.00328614	-0.134281	0.278937	0.0920279	0.178072	-0.02348	0.185063	0.275784		-0.143749	-0.0754389	0.0447139	0.0714128	0.211587	-0.131571	0.279849	-0.0216925		0.0182248	0.231867	0.228616	0.00259083	-0.0229159	0.067712	0.046807	0.345902
6.90406	0.142355	-0.130629	-0.0999428	0.357784	-0.011338	0.190815	-0.244115	0.166253		-0.0119317	-0.134242	0.24526	0.112456	0.213972	-0.053105	0.175498	0.255395		-0.104766	-0.0337728	0.0305474	0.00873951	0.206243	-0.0807651	0.26895	0.00668124		-0.0362392	0.204326	0.208937	0.0132791	-0.0199815	0.103591	0.0454811	0.354695
6.97523	0.174896	-0.132682	-0.102753	0.449808	0.0084542	0.212424	-0.288339	0.182231		-0.0232721	-0.10295	0.243402	0.0973883	0.215486	-0.123365	0.174279	0.217817		-0.14477	-0.0450224	-0.0193059	-0.0178829	0.231505	-0.0369933	0.245002	-0.0329107		-0.0568024	0.202587	0.214266	0.0462806	-0.0250193	0.164107	0.0721952	0.37244
7.04641	0.207854	-0.157195	-0.10113	0.400069	0.0592461	0.206922	-0.253345	0.216299		0.0416107	-0.0905658	0.26665	0.0539109	0.224831	-0.0950288	0.226558	0.240241		-0.164625	-0.100353	-0.0610205	-0.0693407	0.256119	-0.0403238	0.25529	-0.0189273		-0.0117434	0.248553	0.223842	0.0472436	-0.0199433	0.18531	0.0578291	0.380958

## Sheet: Figure 4E
ROI 1						ROI 2						ROI 3						ROI 4
Direction (deg)	Set 1	Set 2	Set 3	Average		Direction (deg)	Set 1	Set 2	Set 3	Average		Direction (deg)	Set 1	Set 2	Set 3	Average		Direction (deg)	Set 1	Set 2	Set 3	Average
0	0.739044	0.610634	0.169468	0.506382		0	0.511027	1.38436	0.26995	0.721777		0	0.477795	0.517922	0.471432	0.48905		0	0.960437	0.648929	0.526082	0.711816
45	0.951073	0.903009	0.96064	0.938241		45	0.55894	0.697536	0.581894	0.61279		45	1.03442	1.34505	0.502255	0.960575		45	1.20491	0.912594	1.04862	1.05537
90	1.06048	1.10727	0.919976	1.02924		90	0.817905	0.650274	0.965002	0.811061		90	1.28152	1.64463	1.01048	1.31221		90	1.44651	0.964139	0.921595	1.11075
135	0.810191	1.16514	0.471017	0.815449		135	1.12974	1.03207	0.49681	0.886206		135	1.16969	0.838465	0.572765	0.860308		135	0.666388	0.860677	0.561606	0.696224
180	0.315028	1.2181	0.34194	0.625021		180	0.601904	0.361419	0.263514	0.408946		180	0.586647	0.490872	0.18048	0.419333		180	0.411966	0.544692	0.41499	0.457216
225	0.193236	0.839437	0.595935	0.542869		225	0.280667	0.78767	0.261635	0.443324		225	0.465871	0.551837	0.228712	0.415473		225	0.445723	0.449569	0.339275	0.411522
270	0.825668	0.396496	0.335362	0.519175		270	0.547547	0.505037	0.378679	0.477088		270	0.552666	0.586385	0.178244	0.439098		270	0.553545	0.530837	0.471113	0.518499
315	0.921153	0.828806	0.355915	0.701958		315	0.489476	0.418546	0.587553	0.498525		315	0.460707	0.465414	0.198157	0.374759		315	0.441746	0.600005	0.595692	0.545814
360	0.739044	0.610634	0.169468	0.506382		360	0.511027	1.38436	0.26995	0.721777		360	0.477795	0.517922	0.471432	0.48905		360	0.960437	0.648929	0.526082	0.711816
PD	33.6898	128.853	89.7504	84.0976		PD	110.66	44.4468	68.3563	74.4876		PD	97.2677	80.2321	80.3478	85.9492		PD	59.7504	75.3341	55.5417	63.5421
