# Supplementary material for: The functional organization of excitation and inhibition in the dendrites of mouse direction-selective ganglion cells
Source: eLife. 2020 Feb 25;9:e52949. doi: 10.7554/eLife.52949 (PMC7069718; doi:10.7554/eLife.52949)
Supplement: Figure 5—source data 1. [file elife-52949-fig5-data1.xlsx]

## Sheet: Figure 5
	Preferred Angle			DSI			Population Data (384 ROIs, 7 cells)					DSI Range Tuning Curves
	Single Set	Average		Single Set	Average		Histogram Source Data		Nearest Neighbor Differences			0 - 0.1		0.1 - 0.2		0.2 - 0.3		0.3 - 0.4
	76.0618	87.106		0.174558	0.210444		PD	DSI	PD	DSI		Average	Standard Dev.	Average	Standard Dev.	Average	Standard Dev.	Average	Standard Dev.
	130.969	134.145		0.14556	0.133274		-33.641	0.100173	7.52425	0.0357098		0.494175	0.0769486	0.45656	0.135952	0.34174	0.0830148	0.30526	0.0540819
	53.8237	97.6408		0.263756	0.209066		16.9502	0.316107	15.835	0.0581124		0.517002	0.0849878	0.433417	0.115132	0.379054	0.09041	0.328248	0.0539452
	71.3544	56.7352		0.250618	0.226496		27.9625	0.215646	38.159	0.0987533		0.503639	0.0827301	0.46871	0.124319	0.437929	0.111786	0.46244	0.0742922
	49.4543	66.344		0.189016	0.190555		-25.3302	0.122575	27.4482	0.0651996		0.528602	0.0805972	0.547281	0.148008	0.640977	0.155382	0.750302	0.112286
	87.2442	90.8621		0.264361	0.170533		-41.1652	0.0644629	11.6834	0.116679		0.603075	0.0865043	0.683747	0.173728	0.847162	0.143969	1.01678	0.119583
	60.1075	75.0589		0.210583	0.231189		7.45043	0.185764	12.0527	0.0335851		0.577448	0.0879469	0.638583	0.15102	0.73494	0.160872	0.874261	0.103722
	146.894	102.783		0.231717	0.184864		22.9887	0.237793	11.6834	0.116679		0.529336	0.0796946	0.4957	0.123723	0.51347	0.137895	0.510666	0.0975522
	61.5121	118.59		0.169147	0.151676		19.1338	0.302443	17.402	0.000359431		0.503328	0.0852579	0.443838	0.135545	0.386338	0.112088	0.338245	0.0501581
	117.287	86.9914		0.174756	0.194187		12.8289	0.221329	9.66277	0.117212
	56.642	110.044		0.302031	0.203031		1.2408	0.244274	6.53323	0.018673
	69.246	98.7762		0.17709	0.12859		5.58669	0.238153	17.5532	0.0592281
	66.9638	165.563		0.205617	0.140746		9.83988	0.251473	36.9476	0.169974
	55.532	86.4782		0.157612	0.241011		3.30664	0.270146	8.6671	0.0310425
	5.8426	66.2245		0.0787156	0.195529		-6.19276	0.165372	9.66277	0.117212
	109.327	92.0677		0.317003	0.288229		17.6394	0.271738	33.8399	0.0371331
	87.7965	81.6226		0.384323	0.385763		11.3605	0.2246	4.0607	0.00920135
	67.4629	67.0916		0.296325	0.233205		-6.97422	0.18415	4.34589	0.00612174
	99.2336	98.4432		0.239844	0.233181		7.97661	0.154526	0.781464	0.0187778
	73.4593	69.5673		0.170787	0.192834		6.01041	0.231789	33.6812	0.0995407
	75.9432	77.7583		0.24679	0.246987		-2.65669	0.262832	106.73	0.193594
	96.7833	138.491		0.0932693	0.115614		9.04136	0.265277	4.25319	0.0133206
	83.2538	96.1687		0.330333	0.314535		-25.7046	0.254067	0.0243225	0.0328541
	122.45	95.2877		0.344533	0.28034		-1.73387	0.316811	30.3768	0.0014627
	87.9962	93.2646		0.122945	0.177692		-6.71739	0.272033	16.1318	0.0413678
	66.1795	77.4777		0.248628	0.193891		-115.486	0.00452274	15.5383	0.0520288
	21.4207	76.7728		0.0862082	0.120993		-16.8706	0.135528	117.029	0.266096
	117.023	93.9702		0.182678	0.206651		-14.7061	0.26531	52.5257	0.160137
	193.899	115.052		0.0809301	0.171425		-2.08442	0.368819	61.6035	0.115473
	99.962	86.3667		0.234153	0.224132		-5.1927	0.336247	9.71048	0.162285
	68.8047	100.582		0.212708	0.13909		15.6707	0.266773	61.9376	0.115564
	128.82	118.947		0.249684	0.161139		-38.6247	0.0946029	12.8552	0.00482377
	91.0582	100.518		0.160929	0.211007		20.7724	0.180027	2.05066	0.0259755
	68.4767	81.6321		0.282323	0.243838		-8.75595	0.198117	6.91449	0.0541833
	88.8626	87.0192		0.288259	0.283798		-6.21708	0.198226	19.6069	0.0532757
	112.722	89.7965		0.163793	0.196631		-15.4962	0.260225	39.8593	0.102266
	49.5818	71.3666		0.193701	0.166333		-3.89936	0.17965	3.46312	0.0356704
	84.2417	64.0658		0.307729	0.24973		14.398	0.275443	22.6827	0.110784
	110.931	68.3843		0.384668	0.207397		1.54276	0.270619	22.9466	0.0744607
	61.2276	166.906		0.147515	0.155878		-13.1316	0.25241	29.2058	0.0395668
	70.1632	72.5333		0.345663	0.258853		12.4409	0.226285	22.9466	0.0744607
	56.7946	77.0487		0.200886	0.136599		3.53603	0.212177	29.2058	0.0395668
	68.6271	98.2259		0.248566	0.302526		-52.2045	0.0811441	154.223	0.0961626
	55.7905	76.3035		0.237004	0.253485		153.572	0.177307	103.17	0.0437678
	46.8019	69.3308		0.247791	0.272856		-1.84828	0.146428	67.5106	0.0631525
	62.2327	65.9004		0.185097	0.136798		50.4025	0.133539	86.783	0.0916391
	77.8289	57.6338		0.269085	0.134431		-8.85937	0.169362	62.6175	0.0665741
	58.1875	84.6173		0.290192	0.232674		27.9208	0.0860113	162.432	0.00794521
	74.2938	77.0245		0.158892	0.223237		15.3061	0.144297	93.7539	0.125164
	25.565	72.6004		0.0558242	0.205098		77.9236	0.0777225	61.7628	0.0776953
	96.775	87.4362		0.208624	0.210413		-9.70695	0.124535	28.1683	0.0287893
	92.6906	93.5922		0.349503	0.258869		2.96828	0.18227	17.7851	0.040566
	88.836	88.544		0.239987	0.261913		-2.24098	0.233978	111.766	0.0859841
	171.964	119.979		0.173666	0.168514		-33.8421	0.163707	43.3451	0.0882174
	78.2141	67.7765		0.178288	0.174418		-15.8303	0.202887	60.1095	0.00900423
	82.9009	83.1131		0.189073	0.236531		6.45346	0.155505	8.19331	0.0783176
	86.9899	104.024		0.11308	0.156535		10.9333	0.117287	61.7628	0.0776953
	26.6741	150.883		0.0824722	0.176208		-8.39276	0.195179	77.152	0.0572205
	71.8675	93.9032		0.301507	0.205676		-1.73985	0.233822	13.1742	0.116691
	73.0146	91.6288		0.318914	0.210485		-40.9957	0.163096	93.7539	0.125164
	70.0345	75.918		0.186976	0.187559		18.4614	0.153324	22.4024	0.034171
	80.2222	92.5454		0.263375	0.171215		45.9301	0.125189	32.1363	0.00626504
	65.3697	81.5336		0.312704	0.323735		0.206029	0.209471	27.1884	0.0956132
	68.5816	76.4187		0.182551	0.222901		16.2847	0.157612	14.3299	0.0858402
	87.8438	79.2007		0.367241	0.224691		1.95476	0.243453	98.0452	0.0919645
	107.476	98.4799		0.253111	0.192613		22.9838	0.22007	13.982	0.0564588
	81.8443	93.8037		0.27581	0.295273		-44.3201	0.0768974	126.52	0.103037
	91.2288	120.3		0.241652	0.162625		28.0001	0.16771	26.7208	0.0437175
	172.074	100.384		0.154804	0.164362		49.325	0.0667459	24.7414	0.0711061
	32.9942	80.8371		0.228974	0.219792		-118.551	0.283797	43.7511	0.116875
	16.8215	69.399		0.254976	0.256261		-13.7216	0.257354	24.6548	0.140067
	39.4995	88.6595		0.154343	0.13516		24.9475	0.138365	162.107	0.100409
	100.457	84.5716		0.231546	0.25548		7.96943	0.18076	26.8292	0.043677
	106.372	79.2987		0.208584	0.193546		-20.1216	0.169687	35.4276	0.0253904
	90.3384	77.963		0.284355	0.327549		24.9809	0.190105	8.30174	0.00907685
	39.0673	73.7937		0.161543	0.251753		19.4857	0.0806928	49.1481	0.01941
	152.96	82.2686		0.078251	0.160083		43.8508	0.311166	14.8462	0.0396739
	88.3967	84.2077		0.297111	0.337983		-26.5352	0.158781	30.379	0.037778
	51.9137	75.2598		0.180435	0.191781		3.84374	0.196559	30.379	0.037778
	91.2067	84.9643		0.205989	0.231632		-7.48941	0.219764	25.7225	0.00463288
	64.725	86.492		0.220719	0.281294		18.2331	0.215131	39.3954	0.000489801
	69.3529	85.1449		0.131163	0.187477		27.5702	0.0764129	37.2688	0.0577583
	53.1248	83.7395		0.262506	0.177042		-22.2913	0.114826	4.15707	0.0372455
	62.1216	67.6583		0.362515	0.279631		3.93412	0.139054	65.3986	0.124362
							38.8634	0.283143	21.6073	0.106528
							46.5033	0.25484	34.5361	0.0750235
							-11.1007	0.043426	4.73453	0.0596743
							-30.345	0.136339	26.2255	0.0242283
							39.8404	0.108602	65.0327	0.0924863
							-37.947	0.254222	48.5781	0.0787915
							64.4849	0.296624	36.1641	0.0795076
							55.5019	0.157372	91.0201	0.137843
							40.0982	0.218562	52.2258	0.101085
							14.5	0.224081	28.2582	0.136629
							49.1975	0.195587	9.15117	0.102612
							8.00081	0.233805	9.93933	0.0801124
							53.932	0.135912	13.0717	0.0507764
							43.2391	0.196069	10.3314	0.0822932
							57.8808	0.136736	71.9854	0.00639237
							-0.864742	0.107187	49.9696	0.0833554
							29.7122	0.180531	14.0712	0.100477
							35.6251	0.177483	37.1456	0.0233936
							54.6741	0.128383	4.03851	0.126078
							42.4155	0.2622	31.8291	0.18246
							53.6567	0.105503	60.4689	0.13268
							14.2788	0.153137	45.5843	0.0939048
							14.1751	0.114266	4.37576	0.0870736
							47.12	0.135316	42.3062	0.1597
							-96.6315	0.00966813	6.47894	0.0115223
							40.8604	0.186689	9.70174	0.0190066
							26.3572	0.0909955	32.0474	0.0177539
							-20.2574	0.0971752	65.3723	0.152048
							24.4393	0.143969	10.6471	0.0144657
							-18.0534	0.12952	30.0312	0.040697
							-51.065	0.166835	29.4803	0.0291523
							10.3681	0.244446	132.179	0.218726
							-18.6672	0.162661	10.2124	0.070503
							-11.4403	0.287961	20.7199	0.0304958
							-6.71295	0.15352	29.4927	0.0080568
							10.2403	0.279215	33.2977	0.0588289
							-9.28016	0.151814	9.78378	0.0275039
							8.08472	0.122923	25.6705	0.0515943
							35.548	0.228394	44.7677	0.0666419
							-45.964	0.138602	30.4764	0.0409367
							63.8173	0.121226	48.6549	0.118135
							-3.64781	0.200756	26.5816	0.033552
							-4.62608	0.24641	26.668	0.0711439
							18.5643	0.317962	66.3756	0.0501789
							47.8176	0.144614	95.8278	0.117486
							17.7865	0.103917	36.2471	0.044813
							23.4556	0.176849	4.91522	0.0366033
							-21.9427	0.101868	18.2949	0.098888
							41.1199	0.267398	0.446609	0.111214
							6.80059	0.159733	60.4039	0.179152
							15.9885	0.327073	43.7057	0.0224704
							-27.7346	0.183719	7.15347	0.149337
							-32.8337	0.255565	52.2206	0.223972
							-13.1919	0.165042	27.1035	0.0239075
							0.996297	0.166751	43.7057	0.0224704
							-35.2603	0.172943	7.15347	0.149337
							6.89136	0.0358864	16.7609	0.130662
							37.5543	0.161561	50.1511	0.0540832
							17.0095	0.0652511	11.0952	0.112821
							-26.0067	0.101536	14.1782	0.0905899
							5.91423	0.178072	40.7946	0.0408828
							20.0924	0.0874826	14.1782	0.0905899
							14.788	0.142419	67.2837	0.0215604
							-50.2742	0.0868115	25.9433	0.036169
							31.8575	0.214242	11.6472	0.0119736
							-0.41711	0.122491	3.60394	0.0633311
							-10.1239	0.144078	12.8265	0.0159442
							16.9139	0.0722736	1.37192	0.0198692
							-6.51991	0.0807473	11.2838	0.0477884
							3.14077	0.130445	67.1881	0.0145379
							-181.347	0.0535659	12.8265	0.0159442
							-1.78903	0.102622	24.2176	0.00108545
							35.5367	0.115481	19.26	0.00586024
							22.7102	0.131425	40.7946	0.0408828
							46.8205	0.0676921	3.86728	0.00307357
							3.45017	0.125564	2.12598	0.0701455
							6.14159	0.127025	35.9538	0.00701036
							67.4246	0.182444	97.1992	0.0696041
							24.3592	0.0786408	20.2521	0.0684611
							33.1708	0.199621	66.3356	0.0917925
							52.6141	0.221391	36.4915	0.04793
							17.6526	0.157735	66.3356	0.0917925
							42.1745	0.143645	70.6635	0.0932023
							-1.73396	0.109764	5.62585	0.0838222
							71.2727	0.190303	66.2549	0.207637
							23.198	0.140699	66.3356	0.0917925
							12.5238	0.0877023	27.4808	0.213513
							0.482838	0.152019	39.6176	0.0212917
							18.1525	0.137383	36.0535	0.022092
							39.3978	0.150431	52.9964	0.139317
							30.1285	0.084256	95.2296	0.0241881
							0.905141	0.100253	45.3184	0.0474186
							-31.6157	0.112314	3.30418	0.0532403
							-114.155	0.103638	21.0404	0.0258099
							62.0082	0.100156	7.25873	0.142705
							4.03225	0.0608059	27.114	0.037728
							-0.871318	0.183283	69.9427	0.0502848
							-35.1058	0.167447	31.251	0.0638078
							-13.1857	0.179047	159.947	0.10486
							-32.6558	0.118361	69.6801	0.0150025
							-149.26	0.135379	3.30418	0.0532403
							-9.67652	0.078111	162.504	0.0385426
							27.1915	0.137657	46.3351	0.0558123
							2.83408	0.0686426	0.832825	0.0482955
							17.5848	0.132655	63.2333	0.157802
							26.6313	0.0743942	56.3007	0.218772
							13.2003	0.265067	37.0014	0.0938464
							9.09285	0.237126	51.2837	0.0253294
							-6.19345	0.31181	61.9858	0.0524971
							9.32143	0.163412	27.0975	0.155596
							7.03692	0.214334	31.8882	0.0870006
							7.7329	0.257836	15.8212	0.102099
							14.2862	0.225837	70.2429	0.165489
							26.1093	0.183909	154.208	0.0311288
							20.7581	0.291776	45.0239	0.0150598
							21.0105	0.110457	4.80676	0.0704422
							13.0144	0.245294	33.2438	0.028309
							-1.25737	0.132102	111.627	0.129101
							17.5111	0.237871	26.7753	0.0172823
							26.692	0.207171	52.9964	0.139317
							13.4673	0.221348	59.8549	0.0271697
							3.8992	0.144106	59.8549	0.0271697
							7.52024	0.220961	56.5977	0.0630094
							-0.00889148	0.169649	0.996674	0.0287961
							-34.637	0.117985	1.62315	0.189739
							-3.57685	0.113341	22.1054	0.00712773
							-34.1044	0.0336349	2.59059	0.155449
							5.39727	0.146764	20.0369	0.240555
							-24.3656	0.191282	12.8314	0.122101
							9.21651	0.109025	8.06856	0.014252
							22.5971	0.136826	4.99361	0.136868
							95.9945	0.128599	0.146561	0.101853
							19.0473	0.129742	14.0564	0.0740509
							-1.20472	0.198203	20.8902	0.0338601
							-57.4371	0.11039	9.29913	0.0974121
							-7.67067	0.242826	29.4614	0.149177
							-13.1683	0.160179	52.8942	0.0709042
							58.6649	0.151034	26.9153	0.00333793
							-17.4441	0.081812	24.9018	0.117452
							20.1923	0.220646	21.9867	0.138312
							-17.9751	0.0897372	0.0662003	0.0192677
							25.3309	0.221801	23.2775	0.183085
							-135.16	0.0986132	10.778	0.0118492
							8.81786	0.318027	55.8365	0.0995438
							-9.01707	0.217451	2.88706	0.0814275
							34.0087	0.181096	71.4699	0.124835
							29.8434	0.246005	33.9418	0.0109666
							-2.04481	0.159004	0.236046	0.0666831
							-11.0152	0.166036	32.8573	0.169651
							0.764866	0.152787	8.22443	0.13783
							24.639	0.215928	15.0675	0.00314078
							-17.5581	0.111252	7.87355	0.0898277
							22.7475	0.258339	16.7374	0.202578
							27.3433	0.137156	1.89391	0.254471
							79.0482	0.0395666	12.5253	0.0414858
							24.7866	0.203473	2.45751	0.0572025
							-8.50349	0.194531	32.9047	0.211238
							22.5847	0.1033	0.565216	0.0371815
							26.0518	0.178884	21.3952	0.035896
							9.50571	0.30325	22.9566	0.151322
							-38.5943	0.0581257	44.9876	0.108742
							28.0564	0.176432	19.9016	0.246593
							-26.1429	0.276458	31.7165	0.0397548
							-11.4968	0.213722	7.83791	0.0142978
							1.96518	0.205326	31.8348	0.316912
							0.793629	0.104499	8.87098	0.097723
							19.4433	0.205098	10.0179	0.0719321
							34.5231	0.223366	28.0875	0.187785
							-23.0852	0.133194	59.8049	0.112785
							27.5402	0.135505	58.6362	0.0569726
							27.972	0.135047	10.6721	0.133643
							-32.5784	0.168667	20.6872	0.1676
							52.0486	0.178116	19.9163	0.162347
							90.4352	0.0551568	1.89415	0.0781964
							13.5228	0.121574	17.7316	0.148508
							-12.84	0.30328	3.41996	0.176313
							-20.2931	0.257243	5.5503	0.063538
							36.6828	0.219688	8.25925	0.170777
							-0.145122	0.218817	8.47583	0.112344
							-17.73	0.168195	39.6206	0.0878489
							-43.8022	0.201563	24.3373	0.012989
							-27.7757	0.320081	8.57155	0.0221406
							-29.0194	0.177756	1.92126	0.0494099
							-14.2619	0.199215	12.8075	0.240931
							-15.9922	0.272243	1.92689	0.113962
							-5.51612	0.210752	22.1651	0.105262
							-26.4935	0.172834	16.327	0.0228399
							-45.1585	0.17083	59.0753	0.0993275
							-18.2592	0.202293	15.2468	0.157485
							-33.836	0.359095	32.6855	0.175404
							-7.58386	0.213274	8.11506	0.206683
							-35.6218	0.215411	43.7576	0.129481
							-6.14128	0.28495	32.3081	0.118084
							-13.1254	0.254934	8.92513	0.137325
							-2.8529	0.372383	16.5468	0.0291227
							-16.9854	0.431196	4.71767	0.0651339
							-30.3448	0.332296	20.0162	0.0211661
							-6.11756	0.342259	37.013	0.225373
							-34.5081	0.33631	10.5293	0.0020919
							-15.623	0.314815	13.3856	0.118356
							44.168	0.151973	21.9459	0.0456776
							-1.45896	0.361131	13.3856	0.118356
							-3.77583	0.36254	21.9459	0.0456776
							-11.6932	0.199978	13.3856	0.118356
							-28.716	0.223831
							-40.3345	0.153244
							-10.3922	0.242431
							-3.01197	0.22185
							-11.0176	0.260485
							-1.98265	0.148224
							10.883	0.276845
							-7.53787	0.262617
							-24.9391	0.311888
							-16.253	0.328105
							-11.3127	0.223221
							-59.7326	0.119932
							-26.8291	0.242936
							6.81162	0.230718
							-31.0975	0.102472
							-21.3056	0.317214
							-26.7359	0.175323
							-3.27061	0.382469
							-26.2925	0.281936
							-35.2449	0.323412
							-25.328	0.214514
							-36.9093	0.145904
							-24.9744	0.359096
							-29.6429	0.264933
							8.46366	0.159394
							-15.6594	0.238286
							-6.45201	0.331848
							-8.69088	0.308223
							40.106	0.0734762
							23.23	0.111936
							-45.6451	0.217857
							-27.501	0.200729
							-13.0685	0.286927
							-1.26055	0.186494
							-55.9665	0.152464
							-4.05775	0.224361
							-2.97071	0.288975
							-9.99932	0.241478
							9.51096	0.193837
							-17.5292	0.369122
							-27.6742	0.35033
							-20.5934	0.207508
							8.31136	0.265615
							1.2939	0.292792
							-14.0486	0.186989
							-30.9476	0.1528
							-36.5546	0.296337
							-29.6905	0.226513
							-4.12109	0.134862
							-13.2402	0.248707
							-16.4886	0.227304
							-23.1764	0.356946
							-18.3926	0.333166
							-39.189	0.133094
							-15.65	0.339751
							-31.4345	0.181285
							-24.2614	0.225333
							-11.0585	0.287085
							-23.1654	0.243396
							-29.4881	0.153531
							-29.3626	0.327514
							-34.4138	0.302662
							-29.0602	0.244665
							-1.60257	0.326642
							-15.3703	0.323932
							-9.06262	0.285387
