# Supplementary material for: The functional organization of excitation and inhibition in the dendrites of mouse direction-selective ganglion cells
Source: eLife. 2020 Feb 25;9:e52949. doi: 10.7554/eLife.52949 (PMC7069718; doi:10.7554/eLife.52949)
Supplement: Figure 6—source data 1. [file elife-52949-fig6-data1.xlsx]

## Sheet: Figure 6
	Control				AP5					Color Map Source Data			Cumulative Histograms
	Preferred Direction		Null Direction		Preferred Direction		Null Direction			PD	DSI		Preferred Direction			DSI
Time	Average	SEM	Average	SEM	Average	SEM	Average	SEM		287.807	0.32386		Direction (x scale)	Control	AP5	DSI (x scale)	Control	DSI (x scale)	AP5
0	0.120051	0.0690987	0.129518	0.057204	0.0613262	0.00958948	0.0467477	0.0189047		259.242	0.219279		-180.603	0	0.0017762	0.005	0	0.0121369	0.00178253
0.078125	0.127735	0.0727864	0.130968	0.0594585	0.0615389	0.0101672	0.0484255	0.0185466		283.16	0.408271		-179.608	0	0.0017762	0.015	0.0031679	0.0134934	0.00178253
0.15625	0.127283	0.0645253	0.133482	0.0565009	0.0648941	0.0131987	0.0497179	0.0162569		279.873	0.190802		-178.614	0.00211193	0.0017762	0.025	0.0095037	0.0148499	0.00178253
0.234375	0.125223	0.0625922	0.13044	0.0488863	0.0676404	0.0116979	0.0538503	0.0124687		281.438	0.290738		-177.619	0.00211193	0.0035524	0.035	0.0147835	0.0162064	0.00178253
0.3125	0.113923	0.0592712	0.124711	0.0470882	0.0725643	0.0120614	0.0474457	0.0138664		263.199	0.148708		-176.625	0.00211193	0.0035524	0.045	0.0200634	0.0175629	0.00178253
0.390625	0.108921	0.0572554	0.121875	0.0427895	0.0730112	0.0111164	0.0503515	0.0141547		304.788	0.146903		-175.631	0.0031679	0.0035524	0.055	0.0348469	0.0189194	0.00178253
0.46875	0.106295	0.0484891	0.111893	0.040555	0.0661442	0.00741145	0.0453892	0.015027		278.792	0.123375		-174.636	0.0031679	0.0053286	0.065	0.0496304	0.0202759	0.00534759
0.546875	0.0978286	0.0400239	0.115669	0.0407141	0.0622628	0.00699054	0.0436914	0.0146002		291.874	0.281123		-173.642	0.00422387	0.0071048	0.075	0.0591341	0.0216324	0.00534759
0.625	0.0935718	0.0359982	0.108597	0.0352892	0.0610217	0.00661085	0.0416569	0.0162408		273.492	0.233654		-172.647	0.00527983	0.0071048	0.085	0.0644139	0.0229889	0.00534759
0.703125	0.0888262	0.037863	0.107302	0.0340222	0.0633131	0.00792994	0.0379626	0.0163204		309.095	0.274161		-171.653	0.0063358	0.0071048	0.095	0.0823654	0.0243453	0.00534759
0.78125	0.0852089	0.0365699	0.0950465	0.0302422	0.070843	0.00823112	0.0339477	0.0168769		245.937	0.102036		-170.658	0.0063358	0.0071048	0.105	0.104541	0.0257018	0.00534759
0.859375	0.0675543	0.0331806	0.0778892	0.0207935	0.059	0.00877159	0.0226252	0.0126526		290.481	0.282417		-169.664	0.00739176	0.0071048	0.115	0.13094	0.0270583	0.00891266
0.9375	0.0588393	0.0288187	0.0627459	0.0179278	0.0534329	0.0147523	0.0145198	0.011048		253.347	0.124405		-168.669	0.00844773	0.0071048	0.125	0.164731	0.0284148	0.00891266
1.01562	0.0582794	0.0284053	0.0559212	0.0133339	0.0575008	0.0167815	0.00861442	0.0111593		281.239	0.302213		-167.675	0.00844773	0.0071048	0.135	0.182682	0.0297713	0.00891266
1.09375	0.050982	0.0283487	0.0421063	0.0120029	0.0538598	0.0181903	0.00733335	0.0107674		309.653	0.211182		-166.681	0.00844773	0.0071048	0.145	0.204857	0.0311278	0.0106952
1.17188	0.0453308	0.0250852	0.0396805	0.0125678	0.048104	0.0226282	0.00805493	0.00825378		266.615	0.213634		-165.686	0.00844773	0.0071048	0.155	0.239704	0.0324843	0.0106952
1.25	0.0425418	0.0200585	0.0366943	0.00741112	0.0415505	0.0232625	-0.00107383	0.00886573		297.013	0.279888		-164.692	0.00844773	0.0071048	0.165	0.279831	0.0338408	0.0106952
1.32812	0.0448009	0.0183578	0.0354807	0.00163439	0.0332273	0.0225254	-0.00122348	0.0112075		301.298	0.27381		-163.697	0.0095037	0.0071048	0.175	0.32735	0.0351973	0.0124777
1.40625	0.0329628	0.0141438	0.0360705	0.00533723	0.020225	0.0212934	-0.0048183	0.00928495		262.041	0.202489		-162.703	0.0105597	0.0071048	0.185	0.355861	0.0365537	0.0142602
1.48438	0.0347424	0.0150326	0.0298308	0.00802536	0.0171049	0.0182452	0.000680283	0.0103917		284.392	0.102666		-161.708	0.0126716	0.0071048	0.195	0.394931	0.0379102	0.0142602
1.5625	0.0271272	0.0101035	0.0270003	0.00937734	0.0122534	0.0169967	0.0106053	0.00788915		282.543	0.244803		-160.714	0.0126716	0.0071048	0.205	0.43717	0.0392667	0.0142602
1.64062	0.0265022	0.0132306	0.029611	0.0129704	0.00865194	0.0116744	0.0153329	0.00756134		298.638	0.179152		-159.719	0.0147835	0.0071048	0.215	0.477297	0.0406232	0.0142602
1.71875	0.0246929	0.00771019	0.034432	0.00912525	0.0068984	0.0119204	0.0174857	0.00826968		313.38	0.145927		-158.725	0.0147835	0.0071048	0.225	0.514256	0.0419797	0.0160428
1.79688	0.0217746	0.00701728	0.0251147	0.0101856	0.00318479	0.00838073	0.0172251	0.0104874		260.344	0.337264		-157.73	0.0168955	0.0071048	0.235	0.545935	0.0433362	0.0160428
1.875	0.0207335	0.00685979	0.0208472	0.0116154	0.00639223	0.00527721	0.0178212	0.0110263		299.424	0.297957		-156.736	0.0168955	0.0071048	0.245	0.588173	0.0446927	0.0160428
1.95312	0.0185533	0.0106137	0.0220744	0.0127164	0.00494585	0.00531252	0.0198807	0.00872529		262.958	0.4073		-155.742	0.0168955	0.0071048	0.255	0.614572	0.0460492	0.0178253
2.03125	0.022023	0.0066188	0.0114457	0.00987376	0.00342166	0.00441027	0.0181105	0.00680973		301.369	0.220866		-154.747	0.0168955	0.0071048	0.265	0.649419	0.0474057	0.0178253
2.10938	0.0153108	0.00723475	0.00653339	0.0113835	0.00654355	0.0062273	0.015339	0.00760224		262.907	0.211287		-153.753	0.0179514	0.0071048	0.275	0.67793	0.0487621	0.0178253
2.1875	0.0187056	0.00636853	0.00473876	0.00816251	0.00634535	0.00551904	0.0121506	0.00597382		303.798	0.305258		-152.758	0.0190074	0.0071048	0.285	0.712777	0.0501186	0.0178253
2.26562	-0.0029561	0.00437572	0.00128193	0.00663436	0.00246197	0.00131059	0.00691009	0.00331173		248.81	0.314282		-151.764	0.0190074	0.0071048	0.295	0.746568	0.0514751	0.0196078
2.34375	-0.0203908	0.000981449	-0.0071844	0.00384964	-0.00472039	0.00408051	-0.00158901	0.00041737		278.529	0.337369		-150.769	0.0200634	0.0071048	0.305	0.767687	0.0528316	0.0213904
2.42188	-0.0409888	0.00598586	-0.0131765	0.00380386	-0.0195094	0.00704905	-0.0114051	0.00475884		301.113	0.336909		-149.775	0.0200634	0.0071048	0.315	0.788807	0.0541881	0.0213904
2.5	-0.037097	0.012598	-0.0136304	0.00769745	-0.0208117	0.00554664	-0.0183404	0.00683737		270.864	0.095096		-148.78	0.0211193	0.0071048	0.325	0.805702	0.0555446	0.0249554
2.57812	-0.0241615	0.0148195	-0.0147026	0.0119314	-0.00718073	0.00333603	-0.016185	0.00493103		301.761	0.297705		-147.786	0.0211193	0.0071048	0.335	0.831045	0.0569011	0.0285205
2.65625	-0.00208196	0.00592913	-0.00481723	0.0154058	0.00202887	0.00364884	-0.013512	0.00746489		283.479	0.331453		-146.792	0.0211193	0.0071048	0.345	0.848997	0.0582576	0.0285205
2.73438	0.0530834	0.00931692	0.00743704	0.00750886	0.026475	0.00378028	-0.0113595	0.00824461		305.039	0.329847		-145.797	0.0221753	0.00888099	0.355	0.861668	0.0596141	0.0285205
2.8125	0.125886	0.0207921	0.0279569	0.00252418	0.0611624	0.00280035	-0.00892029	0.00688658		279.961	0.3051		-144.803	0.0221753	0.00888099	0.365	0.876452	0.0609705	0.0320856
2.89062	0.216307	0.0350077	0.0454712	0.00947015	0.0972871	0.0055473	-0.00219934	0.00803724		299.8	0.244568		-143.808	0.0232313	0.00888099	0.375	0.893347	0.062327	0.0320856
2.96875	0.301949	0.0548066	0.0647027	0.011886	0.142444	0.00783742	0.010825	0.00993953		279.408	0.294468		-142.814	0.0232313	0.00888099	0.385	0.902851	0.0636835	0.0338681
3.04688	0.398486	0.0812716	0.0756657	0.0165199	0.191169	0.0147391	0.0209777	0.00658091		302.512	0.227522		-141.819	0.0232313	0.00888099	0.395	0.917635	0.06504	0.0374332
3.125	0.485945	0.103665	0.0965511	0.0227706	0.236714	0.0182108	0.033595	0.00425419		281.69	0.387646		-140.825	0.0232313	0.00888099	0.405	0.92925	0.0663965	0.0374332
3.20312	0.567801	0.125491	0.119653	0.0277771	0.283198	0.0259571	0.0368095	0.00611038		312.134	0.177644		-139.83	0.0232313	0.00888099	0.415	0.93453	0.067753	0.0374332
3.28125	0.638123	0.141483	0.139871	0.0375343	0.321879	0.0305059	0.042352	0.00709616		279.676	0.343133		-138.836	0.0232313	0.00888099	0.425	0.94509	0.0691095	0.0374332
3.35938	0.697025	0.16105	0.146023	0.0461081	0.360258	0.0335889	0.0492005	0.00563325		289.331	0.365217		-137.842	0.0242872	0.00888099	0.435	0.951426	0.070466	0.0427807
3.4375	0.734592	0.173133	0.159524	0.0500511	0.391885	0.0329395	0.0585757	0.00356994		287.893	0.411891		-136.847	0.0253432	0.00888099	0.445	0.958817	0.0718225	0.0427807
3.51562	0.752999	0.185854	0.163221	0.0562584	0.404962	0.0346013	0.058148	0.00136682		286.834	0.347086		-135.853	0.0253432	0.00888099	0.455	0.966209	0.0731789	0.0445633
3.59375	0.747098	0.190956	0.156492	0.0568039	0.409828	0.0350174	0.0580012	0.000723515		289.762	0.332158		-134.858	0.0263992	0.00888099	0.465	0.966209	0.0745354	0.0481283
3.67188	0.71517	0.188279	0.144407	0.0524953	0.40665	0.0354198	0.0581128	0.00143714		284.183	0.432735		-133.864	0.0263992	0.00888099	0.475	0.970433	0.0758919	0.0499109
3.75	0.65605	0.180938	0.140425	0.0494793	0.387922	0.0371112	0.0524593	0.00486421		280.094	0.398073		-132.869	0.0263992	0.0106572	0.485	0.975713	0.0772484	0.0534759
3.82812	0.575988	0.166384	0.118999	0.0422109	0.354855	0.0316155	0.0396587	0.00228849		276.854	0.397634		-131.875	0.0263992	0.0106572	0.495	0.977825	0.0786049	0.0534759
3.90625	0.493679	0.150049	0.0979149	0.0303233	0.320179	0.0289528	0.0303094	0.00209181		273.754	0.345016		-130.88	0.0263992	0.0106572	0.505	0.979937	0.0799614	0.0552585
3.98438	0.413199	0.135213	0.0769686	0.026522	0.283256	0.0267729	0.023508	0.0012853		258.952	0.439356		-129.886	0.0263992	0.0106572	0.515	0.979937	0.0813179	0.057041
4.0625	0.345235	0.120902	0.068114	0.0243492	0.25617	0.024023	0.0187701	0.00295235		290.356	0.356936		-128.892	0.0274551	0.0106572	0.525	0.982049	0.0826744	0.0588235
4.14062	0.282688	0.112043	0.0533385	0.0189319	0.219016	0.0182077	0.0213689	0.00381155		289.26	0.313477		-127.897	0.0274551	0.0106572	0.535	0.982049	0.0840309	0.0606061
4.21875	0.267242	0.125556	0.0467293	0.0159408	0.19345	0.0234404	0.0169823	0.00719834		289.353	0.363029		-126.903	0.0285111	0.0106572	0.545	0.98416	0.0853873	0.0606061
4.29688	0.227171	0.0981046	0.037249	0.0145065	0.185912	0.0172227	0.0120401	0.00694282					-125.908	0.0295671	0.0106572	0.555	0.986272	0.0867438	0.0623886
4.375	0.168903	0.0743508	0.0313843	0.027371	0.155198	0.0128376	0.0110421	0.00336555					-124.914	0.0295671	0.0106572	0.565	0.988384	0.0881003	0.0659537
4.45312	0.128905	0.055383	0.00250734	0.0298663	0.125905	0.00884992	-0.0093304	0.00168685					-123.919	0.0295671	0.0106572	0.575	0.991552	0.0894568	0.0695187
4.53125	0.0904894	0.0413665	-0.0140199	0.0343246	0.105114	0.0124591	-0.0217944	0.00672676					-122.925	0.030623	0.0106572	0.585	0.992608	0.0908133	0.0713012
4.60938	0.0672032	0.0282271	-0.0355307	0.0411913	0.0794651	0.0134467	-0.038448	0.0103497					-121.93	0.030623	0.0106572	0.595	0.992608	0.0921698	0.0748663
4.6875	0.0424755	0.0144874	-0.0412743	0.0462382	0.0687302	0.0149233	-0.0458862	0.0129828					-120.936	0.031679	0.0124334	0.605	0.99472	0.0935263	0.0766488
4.76562	0.0250869	0.00558187	-0.0541294	0.0515981	0.0595562	0.015382	-0.0540408	0.0149278					-119.941	0.032735	0.0142096	0.615	0.997888	0.0948828	0.0784314
4.84375	0.00926642	0.00514751	-0.057431	0.0628127	0.0495067	0.0158824	-0.0574476	0.0176761					-118.947	0.0337909	0.0142096	0.625	0.998944	0.0962393	0.0802139
4.92188	0.00846021	0.0053847	-0.0607705	0.0653641	0.0463372	0.0201472	-0.0585844	0.0200095					-117.953	0.0337909	0.0142096	0.635	0.998944	0.0975957	0.0802139
5	0.00549417	0.0133209	-0.0603047	0.0662989	0.0450832	0.021504	-0.057925	0.0215559					-116.958	0.0337909	0.0142096	0.645	0.998944	0.0989522	0.083779
													-115.964	0.0359029	0.0142096	0.655	0.998944	0.100309	0.087344
													-114.969	0.0369588	0.0159858	0.665	0.998944	0.101665	0.0909091
													-113.975	0.0380148	0.0159858	0.675	0.998944	0.103022	0.0926916
													-112.98	0.0390708	0.017762	0.685	0.998944	0.104378	0.0926916
													-111.986	0.0390708	0.017762	0.695	0.998944	0.105735	0.0962567
													-110.991	0.0411827	0.017762	0.705	0.998944	0.107091	0.0962567
													-109.997	0.0411827	0.017762	0.715	0.998944	0.108448	0.0998217
													-109.003	0.0422386	0.017762	0.725	0.998944	0.109804	0.0998217
													-108.008	0.0422386	0.0213144	0.735	0.998944	0.111161	0.0998217
													-107.014	0.0422386	0.0213144	0.745	1	0.112517	0.101604
													-106.019	0.0432946	0.0230906	0.755	1	0.113874	0.106952
													-105.025	0.0432946	0.0248668	0.765	1	0.11523	0.106952
													-104.03	0.0454065	0.0248668	0.775	1	0.116587	0.110517
													-103.036	0.0454065	0.0248668	0.785	1	0.117943	0.112299
													-102.041	0.0464625	0.0248668	0.795	1	0.1193	0.114082
													-101.047	0.0464625	0.026643	0.805	1	0.120656	0.117647
													-100.053	0.0485744	0.0284192	0.815	1	0.122013	0.117647
													-99.0581	0.0485744	0.0284192	0.825	1	0.123369	0.122995
													-98.0637	0.0485744	0.0301954	0.835	1	0.124726	0.122995
													-97.0692	0.0506864	0.0319716	0.845	1	0.126082	0.122995
													-96.0748	0.0506864	0.0337478	0.855	1	0.127439	0.122995
													-95.0803	0.0506864	0.0337478	0.865	1	0.128795	0.128342
													-94.0859	0.0506864	0.0337478	0.875	1	0.130151	0.130125
													-93.0914	0.0506864	0.035524	0.885	1	0.131508	0.137255
													-92.097	0.0517423	0.0390764	0.895	1	0.132864	0.14082
													-91.1025	0.0517423	0.0390764	0.905	1	0.134221	0.144385
													-90.1081	0.0517423	0.0390764	0.915	1	0.135577	0.144385
													-89.1136	0.0527983	0.0408526	0.925	1	0.136934	0.14795
													-88.1192	0.0538543	0.0408526	0.935	1	0.13829	0.153298
													-87.1247	0.0538543	0.044405	0.945	1	0.139647	0.15508
													-86.1303	0.0549102	0.0461812	0.955	1	0.141003	0.16221
													-85.1358	0.0559662	0.0461812	0.965	1	0.14236	0.167558
													-84.1414	0.0570222	0.0461812	0.975	1	0.143716	0.16934
													-83.1469	0.0570222	0.0461812	0.985	1	0.145073	0.180036
													-82.1525	0.0580781	0.0497336	0.995	1	0.146429	0.185383
													-81.1581	0.0591341	0.0497336			0.147786	0.188948
													-80.1636	0.0591341	0.0497336			0.149142	0.188948
													-79.1692	0.0591341	0.0515098			0.150499	0.188948
													-78.1747	0.0601901	0.0515098			0.151855	0.190731
													-77.1803	0.0601901	0.0515098			0.153212	0.196078
													-76.1858	0.061246	0.0515098			0.154568	0.201426
													-75.1914	0.0644139	0.053286			0.155925	0.201426
													-74.1969	0.0644139	0.053286			0.157281	0.203209
													-73.2025	0.0675818	0.053286			0.158638	0.206774
													-72.208	0.0707497	0.053286			0.159994	0.215686
													-71.2136	0.0739176	0.0550622			0.161351	0.219251
													-70.2191	0.0739176	0.0586146			0.162707	0.221034
													-69.2247	0.0760296	0.0586146			0.164064	0.222816
													-68.2302	0.0781415	0.0603908			0.16542	0.229947
													-67.2358	0.0791975	0.0639432			0.166777	0.231729
													-66.2413	0.0791975	0.0639432			0.168133	0.237077
													-65.2469	0.0813094	0.0657194			0.16949	0.237077
													-64.2525	0.0823654	0.071048			0.170846	0.244207
													-63.258	0.0823654	0.071048			0.172203	0.256684
													-62.2636	0.0876452	0.071048			0.173559	0.258467
													-61.2691	0.0918691	0.0746004			0.174916	0.26025
													-60.2747	0.093981	0.0763766			0.176272	0.26025
													-59.2802	0.0971489	0.0799289			0.177629	0.26738
													-58.2858	0.0982049	0.0852576			0.178985	0.26738
													-57.2913	0.0992608	0.0905861			0.180342	0.272727
													-56.2969	0.102429	0.0923623			0.181698	0.279857
													-55.3024	0.102429	0.0923623			0.183055	0.283422
													-54.308	0.104541	0.0941385			0.184411	0.290553
													-53.3135	0.106653	0.0941385			0.185768	0.294118
													-52.3191	0.108765	0.0959147			0.187124	0.299465
													-51.3246	0.112988	0.0959147			0.188481	0.304813
													-50.3302	0.118268	0.0976909			0.189837	0.306595
													-49.3357	0.119324	0.0994671			0.191193	0.31016
													-48.3413	0.12566	0.104796			0.19255	0.320856
													-47.3468	0.129884	0.106572			0.193906	0.326203
													-46.3524	0.138332	0.110124			0.195263	0.333333
													-45.358	0.140443	0.111901			0.196619	0.336898
													-44.3635	0.144667	0.115453			0.197976	0.340463
													-43.3691	0.151003	0.115453			0.199332	0.342246
													-42.3746	0.159451	0.122558			0.200689	0.351159
													-41.3802	0.166843	0.12611			0.202045	0.363636
													-40.3857	0.173178	0.129663			0.203402	0.368984
													-39.3913	0.17529	0.136767			0.204758	0.370766
													-38.3968	0.178458	0.145648			0.206115	0.376114
													-37.4024	0.179514	0.150977			0.207471	0.379679
													-36.4079	0.184794	0.159858			0.208828	0.386809
													-35.4135	0.192186	0.166963			0.210184	0.392157
													-34.419	0.197466	0.168739			0.211541	0.40107
													-33.4246	0.202746	0.174067			0.212897	0.40107
													-32.4301	0.205913	0.181172			0.214254	0.4082
													-31.4357	0.218585	0.188277			0.21561	0.411765
													-30.4412	0.224921	0.193606			0.216967	0.413547
													-29.4468	0.231257	0.197158			0.218323	0.417112
													-28.4524	0.239704	0.204263			0.21968	0.42246
													-27.4579	0.242872	0.209591			0.221036	0.426025
													-26.4635	0.249208	0.218472			0.222393	0.434938
													-25.469	0.255544	0.222025			0.223749	0.44385
													-24.4746	0.258712	0.227353			0.225106	0.445633
													-23.4801	0.265048	0.230906			0.226462	0.449198
													-22.4857	0.274551	0.241563			0.227819	0.456328
													-21.4912	0.282999	0.259325			0.229175	0.459893
													-20.4968	0.290391	0.275311			0.230532	0.470588
													-19.5023	0.297782	0.287744			0.231888	0.477718
													-18.5079	0.312566	0.305506			0.233245	0.486631
													-17.5134	0.324182	0.312611			0.234601	0.490196
													-16.519	0.335797	0.321492			0.235958	0.491979
													-15.5245	0.349525	0.326821			0.237314	0.495544
													-14.5301	0.364308	0.330373			0.238671	0.499109
													-13.5356	0.370644	0.342806			0.240027	0.504456
													-12.5412	0.384372	0.349911			0.241384	0.508021
													-11.5467	0.398099	0.35524			0.24274	0.515151
													-10.5523	0.405491	0.364121			0.244097	0.518717
													-9.55785	0.421331	0.37833			0.245453	0.520499
													-8.56341	0.435058	0.390764			0.24681	0.525847
													-7.56896	0.450898	0.399645			0.248166	0.532977
													-6.57451	0.468849	0.412078			0.249523	0.545455
													-5.58007	0.482577	0.422735			0.250879	0.54902
													-4.58562	0.496304	0.442274			0.252235	0.55615
													-3.59117	0.506864	0.458259			0.253592	0.557932
													-2.59672	0.515312	0.476021			0.254948	0.559715
													-1.60228	0.530095	0.488455			0.256305	0.566845
													-0.607829	0.542767	0.497336			0.257661	0.57041
													0.386618	0.544879	0.506217			0.259018	0.573975
													1.38107	0.56283	0.51865			0.260374	0.581105
													2.37551	0.574446	0.538188			0.261731	0.586453
													3.36996	0.585005	0.55595			0.263087	0.593583
													4.36441	0.596621	0.573712			0.264444	0.597148
													5.35885	0.606125	0.587922			0.2658	0.604278
													6.3533	0.616684	0.602131			0.267157	0.606061
													7.34775	0.629356	0.611012			0.268513	0.609626
													8.3422	0.639916	0.619893			0.26987	0.613191
													9.33664	0.648363	0.630551			0.271226	0.616756
													10.3311	0.664203	0.64476			0.272583	0.616756
													11.3255	0.673706	0.65897			0.273939	0.618538
													12.32	0.684266	0.673179			0.275296	0.627451
													13.3144	0.695882	0.687389			0.276652	0.629234
													14.3089	0.706441	0.694494			0.278009	0.634581
													15.3033	0.720169	0.699822			0.279365	0.639929
													16.2978	0.724393	0.708703			0.280722	0.645276
													17.2922	0.736008	0.726465			0.282078	0.650624
													18.2867	0.749736	0.737123			0.283435	0.655971
													19.2811	0.758184	0.746004			0.284791	0.655971
													20.2756	0.761352	0.756661			0.286148	0.657754
													21.27	0.769799	0.767318			0.287504	0.666667
													22.2645	0.772967	0.776199			0.288861	0.670232
													23.2589	0.777191	0.78508			0.290217	0.677362
													24.2534	0.782471	0.793961			0.291574	0.679144
													25.2478	0.788807	0.797513			0.29293	0.682709
													26.2422	0.800422	0.79929			0.294287	0.691622
													27.2367	0.807814	0.808171			0.295643	0.695187
													28.2311	0.81415	0.811723			0.297	0.700535
													29.2256	0.820486	0.82238			0.298356	0.705882
													30.22	0.825766	0.831261			0.299713	0.709447
													31.2145	0.832101	0.83659			0.301069	0.716578
													32.2089	0.837381	0.840142			0.302426	0.716578
													33.2034	0.841605	0.841918			0.303782	0.720143
													34.1978	0.843717	0.849023			0.305139	0.721925
													35.1923	0.846885	0.852575			0.306495	0.730838
													36.1867	0.851109	0.85968			0.307852	0.73262
													37.1812	0.858501	0.868561			0.309208	0.736185
													38.1756	0.86378	0.877442			0.310565	0.73975
													39.1701	0.865892	0.879218			0.311921	0.745098
													40.1645	0.86906	0.884547			0.313277	0.746881
													41.159	0.873284	0.888099			0.314634	0.746881
													42.1534	0.876452	0.888099			0.31599	0.750446
													43.1478	0.878564	0.888099			0.317347	0.750446
													44.1423	0.881732	0.891652			0.318703	0.755793
													45.1367	0.883844	0.895204			0.32006	0.755793
													46.1312	0.885956	0.902309			0.321416	0.757576
													47.1256	0.889124	0.905861			0.322773	0.764706
													48.1201	0.889124	0.907638			0.324129	0.766488
													49.1145	0.892291	0.909414			0.325486	0.766488
													50.109	0.895459	0.909414			0.326842	0.766488
													51.1034	0.896515	0.912966			0.328199	0.770053
													52.0979	0.897571	0.918295			0.329555	0.771836
													53.0923	0.897571	0.920071			0.330912	0.773619
													54.0868	0.899683	0.921847			0.332268	0.773619
													55.0812	0.904963	0.927176			0.333625	0.778966
													56.0757	0.904963	0.928952			0.334981	0.782531
													57.0701	0.907075	0.934281			0.336338	0.784314
													58.0646	0.911299	0.936057			0.337694	0.786096
													59.059	0.912355	0.937833			0.339051	0.791444
													60.0535	0.913411	0.937833			0.340407	0.793226
													61.0479	0.913411	0.939609			0.341764	0.798574
													62.0423	0.916579	0.941385			0.34312	0.800357
													63.0368	0.916579	0.944938			0.344477	0.800357
													64.0312	0.916579	0.944938			0.345833	0.802139
													65.0257	0.920803	0.946714			0.34719	0.805704
													66.0201	0.925026	0.946714			0.348546	0.807487
													67.0146	0.926082	0.946714			0.349903	0.809269
													68.009	0.927138	0.94849			0.351259	0.811052
													69.0035	0.927138	0.950266			0.352616	0.814617
													69.9979	0.928194	0.952043			0.353972	0.816399
													70.9924	0.928194	0.952043			0.355329	0.818182
													71.9868	0.930306	0.952043			0.356685	0.821747
													72.9813	0.933474	0.953819			0.358042	0.821747
													73.9757	0.935586	0.953819			0.359398	0.823529
													74.9702	0.937698	0.953819			0.360755	0.827094
													75.9646	0.93981	0.953819			0.362111	0.832442
													76.9591	0.940866	0.953819			0.363468	0.834225
													77.9535	0.940866	0.953819			0.364824	0.83779
													78.9479	0.941922	0.953819			0.366181	0.841355
													79.9424	0.942978	0.953819			0.367537	0.843137
													80.9368	0.942978	0.953819			0.368894	0.853832
													81.9313	0.944034	0.953819			0.37025	0.853832
													82.9257	0.94509	0.953819			0.371607	0.853832
													83.9202	0.946146	0.953819			0.372963	0.85918
													84.9146	0.948258	0.959147			0.374319	0.85918
													85.9091	0.948258	0.959147			0.375676	0.862745
													86.9035	0.95037	0.959147			0.377032	0.868093
													87.898	0.951426	0.960924			0.378389	0.868093
													88.8924	0.952482	0.960924			0.379745	0.868093
													89.8869	0.955649	0.960924			0.381102	0.869875
													90.8813	0.956705	0.9627			0.382458	0.869875
													91.8758	0.957761	0.964476			0.383815	0.871658
													92.8702	0.957761	0.964476			0.385171	0.871658
													93.8647	0.957761	0.964476			0.386528	0.87344
													94.8591	0.958817	0.966252			0.387884	0.875223
													95.8536	0.958817	0.966252			0.389241	0.877005
													96.848	0.960929	0.966252			0.390597	0.878788
													97.8424	0.961985	0.966252			0.391954	0.88057
													98.8369	0.961985	0.966252			0.39331	0.88057
													99.8313	0.963041	0.968028			0.394667	0.882353
													100.826	0.963041	0.968028			0.396023	0.882353
													101.82	0.963041	0.968028			0.39738	0.887701
													102.815	0.963041	0.968028			0.398736	0.887701
													103.809	0.964097	0.968028			0.400093	0.887701
													104.804	0.964097	0.968028			0.401449	0.891266
													105.798	0.964097	0.968028			0.402806	0.891266
													106.792	0.964097	0.968028			0.404162	0.893048
													107.787	0.964097	0.969805			0.405519	0.893048
													108.781	0.964097	0.971581			0.406875	0.894831
													109.776	0.965153	0.971581			0.408232	0.896613
													110.77	0.965153	0.971581			0.409588	0.896613
													111.765	0.967265	0.971581			0.410945	0.900178
													112.759	0.967265	0.971581			0.412301	0.901961
													113.754	0.967265	0.971581			0.413658	0.901961
													114.748	0.968321	0.971581			0.415014	0.907308
													115.742	0.969377	0.971581			0.416371	0.910873
													116.737	0.971489	0.971581			0.417727	0.912656
													117.731	0.972545	0.971581			0.419084	0.916221
													118.726	0.972545	0.971581			0.42044	0.916221
													119.72	0.972545	0.971581			0.421797	0.919786
													120.715	0.973601	0.971581			0.423153	0.921569
													121.709	0.973601	0.971581			0.42451	0.921569
													122.704	0.973601	0.971581			0.425866	0.921569
													123.698	0.973601	0.976909			0.427223	0.921569
													124.693	0.974657	0.976909			0.428579	0.923351
													125.687	0.975713	0.976909			0.429936	0.923351
													126.681	0.977825	0.978686			0.431292	0.923351
													127.676	0.979937	0.978686			0.432649	0.930481
													128.67	0.979937	0.978686			0.434005	0.930481
													129.665	0.980993	0.978686			0.435361	0.930481
													130.659	0.980993	0.978686			0.436718	0.930481
													131.654	0.982049	0.978686			0.438074	0.934046
													132.648	0.982049	0.978686			0.439431	0.934046
													133.643	0.982049	0.980462			0.440787	0.934046
													134.637	0.982049	0.982238			0.442144	0.934046
													135.631	0.982049	0.984014			0.4435	0.934046
													136.626	0.983105	0.984014			0.444857	0.934046
													137.62	0.983105	0.984014			0.446213	0.937611
													138.615	0.983105	0.984014			0.44757	0.937611
													139.609	0.983105	0.984014			0.448926	0.937611
													140.604	0.98416	0.98579			0.450283	0.939394
													141.598	0.985217	0.98579			0.451639	0.939394
													142.593	0.987328	0.987567			0.452996	0.942959
													143.587	0.988384	0.987567			0.454352	0.944742
													144.581	0.988384	0.987567			0.455709	0.944742
													145.576	0.988384	0.987567			0.457065	0.948307
													146.57	0.988384	0.991119			0.458422	0.948307
													147.565	0.988384	0.991119			0.459778	0.948307
													148.559	0.98944	0.991119			0.461135	0.948307
													149.554	0.98944	0.991119			0.462491	0.948307
													150.548	0.98944	0.991119			0.463848	0.948307
													151.543	0.990496	0.991119			0.465204	0.950089
													152.537	0.990496	0.991119			0.466561	0.950089
													153.531	0.991552	0.991119			0.467917	0.951872
													154.526	0.991552	0.991119			0.469274	0.951872
													155.52	0.992608	0.991119			0.47063	0.955437
													156.515	0.992608	0.991119			0.471987	0.957219
													157.509	0.992608	0.991119			0.473343	0.957219
													158.504	0.993664	0.991119			0.4747	0.957219
													159.498	0.99472	0.991119			0.476056	0.959002
													160.493	0.995776	0.991119			0.477413	0.959002
													161.487	0.995776	0.991119			0.478769	0.959002
													162.482	0.995776	0.992895			0.480126	0.960784
													163.476	0.995776	0.992895			0.481482	0.960784
													164.47	0.995776	0.992895			0.482839	0.962567
													165.465	0.996832	0.992895			0.484195	0.964349
													166.459	0.996832	0.992895			0.485552	0.964349
													167.454	0.996832	0.994671			0.486908	0.964349
													168.448	0.996832	0.994671			0.488265	0.966132
													169.443	0.997888	0.994671			0.489621	0.966132
													170.437	0.997888	0.994671			0.490978	0.966132
													171.432	0.997888	0.996448			0.492334	0.966132
													172.426	0.998944	0.996448			0.493691	0.966132
													173.42	0.998944	0.996448			0.495047	0.966132
													174.415	0.998944	0.996448			0.496403	0.966132
													175.409	0.998944	0.996448			0.49776	0.966132
													176.404	0.998944	1			0.499116	0.966132
																		0.500473	0.966132
																		0.501829	0.966132
																		0.503186	0.966132
																		0.504542	0.966132
																		0.505899	0.967914
																		0.507255	0.967914
																		0.508612	0.969697
																		0.509968	0.969697
																		0.511325	0.969697
																		0.512681	0.969697
																		0.514038	0.969697
																		0.515394	0.969697
																		0.516751	0.969697
																		0.518107	0.969697
																		0.519464	0.971479
																		0.52082	0.971479
																		0.522177	0.971479
																		0.523533	0.973262
																		0.52489	0.973262
																		0.526246	0.973262
																		0.527603	0.973262
																		0.528959	0.973262
																		0.530316	0.973262
																		0.531672	0.973262
																		0.533029	0.973262
																		0.534385	0.973262
																		0.535742	0.973262
																		0.537098	0.973262
																		0.538455	0.975045
																		0.539811	0.975045
																		0.541168	0.975045
																		0.542524	0.975045
																		0.543881	0.976827
																		0.545237	0.976827
																		0.546594	0.976827
																		0.54795	0.976827
																		0.549307	0.97861
																		0.550663	0.97861
																		0.55202	0.97861
																		0.553376	0.97861
																		0.554733	0.980392
																		0.556089	0.980392
																		0.557446	0.982175
																		0.558802	0.982175
																		0.560158	0.982175
																		0.561515	0.982175
																		0.562871	0.982175
																		0.564228	0.982175
																		0.565584	0.982175
																		0.566941	0.982175
																		0.568297	0.982175
																		0.569654	0.982175
																		0.57101	0.982175
																		0.572367	0.982175
																		0.573723	0.982175
																		0.57508	0.982175
																		0.576436	0.982175
																		0.577793	0.982175
																		0.579149	0.982175
																		0.580506	0.982175
																		0.581862	0.983957
																		0.583219	0.983957
																		0.584575	0.983957
																		0.585932	0.983957
																		0.587288	0.983957
																		0.588645	0.983957
																		0.590001	0.983957
																		0.591358	0.98574
																		0.592714	0.98574
																		0.594071	0.98574
																		0.595427	0.98574
																		0.596784	0.98574
																		0.59814	0.98574
																		0.599497	0.98574
																		0.600853	0.987522
																		0.60221	0.989305
																		0.603566	0.989305
																		0.604923	0.989305
																		0.606279	0.989305
																		0.607636	0.989305
																		0.608992	0.991087
																		0.610349	0.991087
																		0.611705	0.99287
																		0.613062	0.99287
																		0.614418	0.99287
																		0.615775	0.99287
																		0.617131	0.99287
																		0.618488	0.99287
																		0.619844	0.99287
																		0.6212	0.99287
																		0.622557	0.99287
																		0.623913	0.99287
																		0.62527	0.99287
																		0.626626	0.99287
																		0.627983	0.99287
																		0.629339	0.994652
																		0.630696	0.994652
																		0.632052	0.994652
																		0.633409	0.994652
																		0.634765	0.994652
																		0.636122	0.994652
																		0.637478	0.994652
																		0.638835	0.994652
																		0.640191	0.994652
																		0.641548	0.994652
																		0.642904	0.994652
																		0.644261	0.994652
																		0.645617	0.994652
																		0.646974	0.996435
																		0.64833	0.996435
																		0.649687	0.996435
																		0.651043	0.996435
																		0.6524	0.996435
																		0.653756	0.996435
																		0.655113	0.996435
																		0.656469	0.996435
																		0.657826	0.996435
																		0.659182	0.996435
																		0.660539	0.996435
																		0.661895	0.996435
																		0.663252	0.996435
																		0.664608	0.996435
																		0.665965	0.996435
																		0.667321	0.996435
																		0.668678	0.996435
																		0.670034	0.996435
																		0.671391	0.996435
																		0.672747	0.996435
																		0.674104	0.996435
																		0.67546	0.996435
																		0.676817	0.996435
																		0.678173	0.996435
																		0.67953	0.996435
																		0.680886	0.996435
																		0.682242	0.996435
																		0.683599	0.996435
																		0.684955	0.996435
																		0.686312	0.996435
																		0.687668	0.996435
																		0.689025	0.996435
																		0.690381	0.996435
																		0.691738	0.996435
																		0.693094	0.996435
																		0.694451	0.996435
																		0.695807	0.996435
																		0.697164	0.996435
																		0.69852	0.996435
																		0.699877	0.996435
																		0.701233	0.996435
																		0.70259	0.996435
																		0.703946	0.996435
																		0.705303	0.996435
																		0.706659	0.996435
																		0.708016	0.996435
																		0.709372	0.996435
																		0.710729	0.996435
																		0.712085	0.996435
																		0.713442	0.996435
																		0.714798	0.996435
																		0.716155	0.996435
																		0.717511	0.996435
																		0.718868	0.998217
																		0.720224	0.998217
																		0.721581	0.998217
																		0.722937	0.998217
																		0.724294	0.998217
																		0.72565	0.998217
																		0.727007	0.998217
																		0.728363	0.998217
																		0.72972	0.998217
																		0.731076	0.998217
																		0.732433	0.998217
																		0.733789	0.998217
																		0.735146	0.998217
																		0.736502	0.998217
																		0.737859	0.998217
																		0.739215	0.998217
																		0.740572	0.998217
																		0.741928	0.998217
																		0.743284	0.998217
																		0.744641	0.998217
																		0.745997	0.998217
																		0.747354	0.998217
																		0.74871	0.998217
																		0.750067	0.998217
																		0.751423	0.998217
																		0.75278	0.998217
																		0.754136	0.998217
																		0.755493	0.998217
																		0.756849	0.998217
																		0.758206	0.998217
																		0.759562	0.998217
																		0.760919	0.998217
																		0.762275	0.998217
																		0.763632	0.998217
																		0.764988	0.998217
																		0.766345	0.998217
																		0.767701	0.998217
																		0.769058	0.998217
																		0.770414	0.998217
																		0.771771	1
