# Supplementary material for: The functional organization of excitation and inhibition in the dendrites of mouse direction-selective ganglion cells
Source: eLife. 2020 Feb 25;9:e52949. doi: 10.7554/eLife.52949 (PMC7069718; doi:10.7554/eLife.52949)
Supplement: Figure 7—source data 1. [file elife-52949-fig7-data1.xlsx]

## Sheet: Figure 7A,C
Synapse Locations		Color Map Source Data: Figure 7A)		Color Map Source Data (PD): Figure 7C				Tuning Curves
X (µm)	Y (µm)	PD (threshold = 55 mV)		PD (threshold = 55 mV)	PD (threshold = 50 mV)	PD (threshold = 48 mV)			> -55 mV			> -50 mV			> -48 mV
109.424	127.881	99.5903		99.5903				Direction (deg)	Site 1	Site 2	Site 3	Site 1	Site 2	Site 3	Site 1	Site 2	Site 3
114.697	131.836	109.221		109.221				0	0.042075	0.031205	0.034368	0	0	0	0	0	0
116.895	126.562	77.9906		77.9906				45	0.179102	0.097389	0.025644	0.040005	0.002508	0	0.015153	0	0
136.889	106.348	123.525		123.525	135	135		90	0.168126	0.149989	0.114482	0.019899	0.005401	0.017839	0.003817	0	0.003173
150.293	127.441	149.825		149.825	149.016	180		135	0.152373	0.220397	0.195502	0.021	0.044219	0.022961	0.00767899	0.024993	0.005784
156.665	117.773	155.076		155.076	156.799	157.634		180	0.185938	0.150114	0.126913	0.028272	0.020625	0.023164	0.007731	0.009299	0.012397
147.437	120.191	121.082		121.082	152.424	180		225	0.104433	0.096061	0.096278	0.008724	0.001119	0.009166	0.000108002	0	2.99988e-05
161.719	129.639	143.246		143.246	142.573	135		270	0.082598	0.071746	0.019404	0	0	0	0	0	0
155.127	135.572	144.81		144.81	135			315	0.064102	0.036846	0.021516	0	0	0	0	0	0
165.894	132.275	153.64		153.64	157.224
94.4824	150.293	139.287		139.287	45
106.128	149.854	144.429		144.429	75.0559	48.7413
101.074	154.908	147.919		147.919	108.877	114.184
103.931	159.961	154.56		154.56	110.653	90.8666
103.491	164.575	157.94		157.94	134.796	137.263
104.37	169.409	157.589		157.589	137.227	141.702
105.469	181.494	152.199		152.199	134.303	139.475
119.971	167.432	160.237		160.237	154.384	160.24
124.146	182.154	156.668		156.668	151.248	164.296
96.2402	155.786	126.118		126.118	180
125.903	150.512	127.283		127.283	90
134.693	135.132	129.049		129.049	215.537
164.135	109.863	113.865		113.865	90	90
170.728	119.092	111.42		111.42	99.2389	92.1821
160.62	141.943	171.317		171.317	56.4738	90
156.445	154.468	123.21		123.21	95.3437	90
169.629	152.93	128.009		128.009	104.046	91.8535
113.598	141.064	167.063		167.063
107.666	145.898	214.498		214.498
111.621	161.719	159.721		159.721	270
117.773	164.795	168.653		168.653	268.42	270
112.5	170.508	168.754		168.754	324.297	360
124.365	176.66	154.299		154.299	159.692	168.687
111.841	172.705	164.979		164.979	312.229	360
115.137	181.494	167.166		167.166	175.935	172.425
124.365	180.615	169.22		169.22	171.256	125.324
130.298	183.911	172.639		172.639	183.644	306.817
117.114	152.49	173.427		173.427
120.41	160.84	163.575		163.575	135
161.06	183.471	140.939		140.939	167.247	177.657
146.557	190.943	157.064		157.064	165.032	167.978
140.844	157.324	203.892		203.892	194.932	180.086
146.997	173.365	132.452		132.452	170.069	177.638
153.149	158.863	157.169		157.169	180	180
166.772	169.848	165.997		165.997	181.676	180.521
142.603	162.378	146.538		146.538	178.126	180
188.305	126.782	98.6462		98.6462	108.912	84.2244
196.436	131.396	81.9531		81.9531	38.7702	24.1895
92.0655	151.172	137.596		137.596	90
88.1104	153.149	136.492		136.492	90
92.9444	168.091	150.203		150.203	120.169
86.3526	175.122	145.969		145.969	124.426
100.415	168.091	157.13		157.13	172.914	180
81.7383	188.525	132.15		132.15	151.323	160.503
74.2676	196.216	130.214		130.214	147.25	135.013
70.3125	195.117	135.116		135.116	146.537	143.935
82.8369	212.256	135.206		135.206	204.319	218.64
75.8056	216.65	132.662		132.662	185.139	205.867
36.0352	220.166	146.081		146.081	155.342	150.243
43.9453	223.242	145.144		145.144	151.818	148.462
50.3174	221.484	146.799		146.799	158.578	159.683
83.4961	187.207	138.439		138.439	152.73	144.235
90.3076	179.516	144.768		144.768	130.227	135
75.5859	187.646	144.725		144.725	114.987	135
97.5586	188.086	147.572		147.572	102.555	90
88.7695	195.117	140.365		140.365	98.0674	90
106.568	198.853	149.167		149.167	140.41	175.431
123.926	197.534	167.218		167.218	174.03	180
126.562	203.906	171.068		171.068	175.832	180
132.275	209.839	175.063		175.063	182.851	183.602
81.5185	178.199	109.641		109.641	124.114	148.057
74.707	163.477	121.579		121.579	45	45
46.1426	191.162	136.055		136.055	151.735	165.273
51.416	199.951	133.398		133.398	143.626	157.204
38.0127	200.171	132.704		132.704	145.248	157.245
41.748	208.96	134.878		134.878	141.152	136.251
39.9902	152.93	154.771		154.771	154.558	141.32
14.2822	156.445	142.015		142.015	135.059	131.825
11.6455	163.257	143.085		143.085	137.705	134.894
39.7705	158.423	153.969		153.969	154.918	146.207
48.3398	160.84	153.603		153.603	144.475	135
29.2236	170.508	154.723		154.723	130.563	128.747
60.2051	182.373	190.466		190.466	185.982	179.574
79.1016	145.459	154.934		154.934
37.5732	136.889	83.4913		83.4913	60.8014	64.0205
45.7031	149.854	91.5956		91.5956	92.7876	91.3036
56.4697	140.186	86.4944		86.4944	73.8724	88.4516
63.2812	133.154	102.29		102.29	61.3142
59.3262	125.684	118.606		118.606	122.814
64.3799	124.146	117.577		117.577	132.107	135
50.0977	114.697	129.132		129.132	103.352	93.9809
24.3897	120.191	157.062		157.062	180.898	191.372
9.88768	139.746	158.935		158.935	172.274	177.453
21.0938	148.975	155.826		155.826	170.155	173.705
13.623	146.338	153.758		153.758	166.667	169.783
36.4746	125.464	151.305		151.305	167.234	171.85
41.748	125.684	147.29		147.29	157.511	156.171
32.0801	113.818	152.566		152.566	174.385	189.252
31.8604	108.325	152.799		152.799	169.938	186.252
26.3672	108.984	156.177		156.177	180.22	196.881
34.2773	103.711	139.396		139.396	135.455	138.543
49.6582	106.348	139.964		139.964	137.075	138.522
45.7031	104.59	139.48		139.48	134.804	133.229
87.2315	117.554	150.843		150.843	161.311	180
100.415	112.72	156.734		156.734	132.887	135
104.15	114.258	162.56		162.56	141.257	135
107.227	125.025	150.627		150.627	156.587	159.651
115.137	94.4824	146.427		146.427	143.803	152.372
107.227	96.8994	148.424		148.424	143.109	144.681
112.5	104.15	156.244		156.244	139.734	135
109.644	95.8008	130.354		130.354	179.168	176.277
127.661	103.052	157.825		157.825	199.97	194.531
124.365	110.962	156.329		156.329	191.916	186.617
115.576	90.9668	136.908		136.908	211.096	282.707
119.312	90.9668	138.758		138.758	213.421	262.5
126.342	92.5049	140.317		140.317	193.768	226.2
126.562	83.4961	136.329		136.329	188.258	258.001
82.1777	135.572	144.542		144.542
75.5859	140.186	144.344		144.344	135
54.0527	157.104	123.158		123.158	92.1708	90
67.456	160.84	139.143		139.143	134.516	135
68.3349	166.553	135.884		135.884	128.217	116.235
80.2002	172.486	140.74		140.74	146.203	139.152
50.7569	146.338	147.766		147.766	145.077	137.971
51.8555	163.916	140.435		140.435	135.806	135
30.9815	135.572	104.385		104.385	97.0681	72.797
37.5732	151.831	134.221		134.221	149.117	149.279
70.5322	153.809	137.738		137.738	124.817	133.039
60.6445	158.643	134.55		134.55	121.474	124.934
52.9541	175.781	133.327		133.327	123.753	120.756
49.2188	172.046	130.167		130.167	119.736	116.115
36.6944	182.373	138.367		138.367	124.614	121.625
41.0889	184.57	136.076		136.076	123.243	123.619
32.0801	193.359	138.987		138.987	128.631	126.951
33.6181	206.324	138.376		138.376	124.595	124.128
16.0401	213.794	145.3		145.3	139.013	135.796
16.2598	209.619	143.749		143.749	136.24	132.46
48.7793	177.979	131.314		131.314	120.672	117.242
47.4609	153.589	138.749		138.749	123.362	113.197
42.4072	132.715	141.116		141.116	130.115	134.728
125.684	93.1641	250.019		250.019	225.272	225
131.176	98.6572	230.948		230.948
176.221	79.9805	239.51		239.51	136.852	135
173.145	76.6845	230.598		230.598	137.223	135
118.432	74.4873	147.653		147.653	148.977	156.314
126.562	71.6309	145.783		145.783	145.951	158.306
123.047	59.7656	142.744		142.744	151.353	158.962
124.805	45.4834	139.854		139.854	143.515	146.766
136.23	49.2188	141.756		141.756	143.967	145.234
132.275	32.959	138.94		138.94	123.102	134.413
137.549	29.8828	133.607		133.607	113.271	111.416
145.898	24.1699	127.4		127.4	110.27	97.2294
172.046	31.8604	123.111		123.111	110.33	90.87
107.666	65.0391	161.577		161.577	163.386	168.284
106.787	50.3174	158.104		158.104	152.44	158.34
91.4062	53.6133	174.385		174.385	167.777	178.353
95.3613	40.2099	155.656		155.656	166.186	170.631
86.792	62.4023	152.532		152.532	157.925	159.46
75.5859	77.3438	144.464		144.464	180.552	180
69.6533	52.2949	190.635		190.635	205.287	202.679
73.169	48.1201	190.166		190.166	205.258	201.509
90.9668	77.3438	171.682		171.682	263.817	270.84
87.0117	72.9492	175.549		175.549	261.641	270
79.7607	68.7744	164.341		164.341	180
54.7119	89.209	143.063		143.063	153.408	151.797
41.9678	86.3526	133.856		133.856	137.586	140.357
27.9052	80.6396	128.048		128.048	117.522	111.562
27.6855	77.3438	129.89		129.89	121.322	115.322
52.9541	105.469	170.454		170.454	188.947	180
80.4199	99.7559	162.728		162.728	177.394	160.016
65.0391	93.1641	160.536		160.536	172.912	180
68.9941	88.5498	147.517		147.517	140.316	150.921
79.7607	92.5049	129.515		129.515	96.6117	86.2022
47.9004	134.033	151.196		151.196	139.78	118.577
25.9277	129.419	131.966		131.966	107.956	99.6462
23.291	119.971	140.062		140.062	126.267	146.508
101.075	111.841	360		360

## Sheet: Figure 7B
Somatic Vm									Somatic Excitatory Currents									Somatic Inhibitory Currents
Time (ms)	0°	45°	90°	135°	180°	225°	270°	315°	Time (ms)	0°	45°	90°	135°	180°	225°	270°	315°	Time (ms)	0°	45°	90°	135°	180°	225°	270°	315°
0	-60	-60	-60	-60	-60	-60	-60	-60	15	0	0	-0.011	0	-0.008	0	0	-0.005	15	0.073	0.073	0.073	0.073	0.073	0.073	0.085	0.101
0.5	-60.191	-60.191	-60.191	-60.191	-60.191	-60.191	-60.191	-60.191	15.5	0	0	-0.011	0	-0.009	0	0	-0.008	15.5	0.068	0.068	0.068	0.068	0.068	0.068	0.087	0.102
1	-60.067	-60.692	-60.21	-59.96	-60.519	-60.112	-60.229	-60.092	16	0	0	-0.012	0	-0.009	0	0	-0.01	16	0.064	0.064	0.064	0.064	0.064	0.064	0.09	0.103
1.5	-60.482	-60.654	-60.467	-60.323	-60.68	-60.77	-60.203	-60.349	16.5	0	-0.001	-0.012	0	-0.01	0	0	-0.013	16.5	0.059	0.059	0.059	0.059	0.059	0.059	0.094	0.104
2	-60.6	-60.372	-61.149	-60.388	-60.533	-60.694	-60.814	-60.577	17	0	-0.002	-0.012	0	-0.01	0	0	-0.015	17	0.055	0.055	0.055	0.055	0.055	0.055	0.096	0.104
2.5	-60.447	-60.643	-60.794	-60.551	-60.598	-60.538	-60.904	-60.869	17.5	0	-0.003	-0.012	0	-0.011	0	0	-0.017	17.5	0.052	0.052	0.052	0.052	0.052	0.052	0.098	0.104
3	-60.409	-60.615	-60.681	-60.335	-60.64	-60.696	-60.886	-60.697	18	0	-0.005	-0.012	0	-0.011	0	0	-0.018	18	0.048	0.048	0.048	0.048	0.048	0.048	0.099	0.104
3.5	-60.452	-61.229	-61.023	-60.602	-61.022	-60.661	-60.871	-60.618	18.5	0	-0.006	-0.012	0	-0.011	0	0	-0.02	18.5	0.045	0.045	0.045	0.045	0.045	0.045	0.1	0.104
4	-60.624	-61.256	-60.832	-60.358	-60.74	-60.579	-60.907	-60.659	19	0	-0.007	-0.014	0	-0.011	0	0	-0.021	19	0.042	0.042	0.042	0.042	0.042	0.042	0.1	0.103
4.5	-60.255	-61.499	-60.978	-60.294	-60.65	-60.791	-60.789	-60.991	19.5	0	-0.008	-0.016	0	-0.011	0	0	-0.021	19.5	0.039	0.039	0.039	0.039	0.039	0.039	0.1	0.103
5	-60.854	-61.371	-61.059	-60.647	-60.592	-60.7	-60.889	-60.855	20	-0.001	-0.009	-0.019	0	-0.011	0	0	-0.022	20	0.037	0.037	0.037	0.037	0.038	0.037	0.1	0.102
5.5	-60.87	-60.928	-60.938	-60.941	-60.943	-60.95	-60.883	-61.335	20.5	-0.002	-0.009	-0.021	0	-0.011	0	0	-0.025	20.5	0.035	0.034	0.034	0.034	0.037	0.034	0.099	0.104
6	-61.02	-60.967	-61.152	-60.717	-61.033	-61.126	-61.113	-61.102	21	-0.003	-0.01	-0.023	0	-0.01	0	0	-0.029	21	0.035	0.032	0.032	0.032	0.038	0.032	0.098	0.107
6.5	-61.101	-61.205	-61.38	-60.578	-61.242	-61.154	-61.134	-60.931	21.5	-0.005	-0.01	-0.025	0	-0.01	0	0	-0.032	21.5	0.037	0.03	0.03	0.03	0.038	0.03	0.098	0.11
7	-60.721	-61.077	-61.054	-61.088	-61.365	-61.343	-61.125	-61.886	22	-0.006	-0.01	-0.027	0	-0.01	0	0	-0.034	22	0.04	0.028	0.028	0.028	0.039	0.028	0.097	0.112
7.5	-60.802	-61.649	-61.254	-61.149	-61.635	-61.955	-61.777	-61.523	22.5	-0.012	-0.011	-0.028	0	-0.01	0	0	-0.035	22.5	0.052	0.026	0.026	0.026	0.04	0.026	0.096	0.114
8	-60.746	-61.599	-61.382	-61.556	-61.563	-61.599	-61.429	-61.369	23	-0.018	-0.011	-0.029	0	-0.009	0	0	-0.036	23	0.065	0.025	0.025	0.025	0.04	0.025	0.096	0.115
8.5	-61.053	-61.788	-61.47	-61.33	-61.349	-61.686	-61.394	-61.353	23.5	-0.024	-0.011	-0.029	0	-0.011	0	0	-0.036	23.5	0.077	0.023	0.023	0.023	0.041	0.023	0.096	0.117
9	-61.054	-61.434	-61.14	-61.202	-61.333	-61.652	-61.147	-61.759	24	-0.028	-0.011	-0.03	-0.001	-0.013	0	0	-0.036	24	0.086	0.022	0.022	0.022	0.041	0.022	0.097	0.12
9.5	-61.258	-61.687	-60.931	-61.004	-61.385	-61.344	-61.536	-61.567	24.5	-0.032	-0.011	-0.03	-0.002	-0.014	0	0	-0.037	24.5	0.092	0.02	0.02	0.02	0.041	0.02	0.098	0.122
10	-61.289	-61.894	-61.305	-61.433	-61.592	-61.479	-62.12	-61.314	25	-0.034	-0.01	-0.03	-0.003	-0.016	0	0	-0.039	25	0.097	0.019	0.019	0.019	0.041	0.019	0.099	0.125
10.5	-61.077	-61.546	-61.491	-61.465	-61.445	-61.541	-61.586	-61.472	25.5	-0.035	-0.01	-0.029	-0.004	-0.017	0	0	-0.04	25.5	0.1	0.018	0.018	0.018	0.041	0.018	0.099	0.127
11	-61.472	-61.691	-61.783	-61.874	-61.584	-61.485	-61.473	-61.492	26	-0.036	-0.01	-0.029	-0.005	-0.019	0	0	-0.041	26	0.103	0.017	0.017	0.017	0.041	0.017	0.099	0.129
11.5	-61.448	-61.345	-61.185	-62.049	-61.732	-61.441	-61.404	-61.411	26.5	-0.036	-0.01	-0.028	-0.007	-0.021	0	0	-0.041	26.5	0.109	0.016	0.016	0.016	0.041	0.016	0.099	0.131
12	-61.928	-61.698	-61.515	-61.853	-61.641	-61.193	-61.678	-60.885	27	-0.036	-0.009	-0.028	-0.008	-0.022	0	0	-0.042	27	0.115	0.015	0.015	0.015	0.041	0.015	0.099	0.132
12.5	-61.696	-61.675	-61.267	-62.265	-61.376	-61.935	-61.679	-61.329	27.5	-0.035	-0.009	-0.027	-0.009	-0.024	0	0	-0.043	27.5	0.12	0.014	0.014	0.014	0.041	0.014	0.101	0.132
13	-61.631	-61.405	-61.27	-61.927	-61.163	-61.708	-61.425	-61.495	28	-0.035	-0.009	-0.026	-0.009	-0.025	0	-0.001	-0.044	28	0.123	0.013	0.013	0.013	0.041	0.013	0.104	0.133
13.5	-61.832	-61.807	-61.065	-61.792	-61.509	-61.947	-61.72	-61.895	28.5	-0.034	-0.009	-0.026	-0.01	-0.025	0	-0.003	-0.044	28.5	0.126	0.012	0.012	0.012	0.04	0.012	0.107	0.133
14	-61.684	-61.991	-60.923	-61.667	-61.422	-61.393	-61.906	-61.385	29	-0.033	-0.008	-0.025	-0.011	-0.027	0	-0.005	-0.044	29	0.128	0.011	0.011	0.011	0.04	0.011	0.11	0.133
14.5	-61.253	-61.571	-61.241	-61.811	-61.193	-61.259	-61.921	-61.449	29.5	-0.032	-0.008	-0.024	-0.011	-0.029	0	-0.006	-0.043	29.5	0.129	0.011	0.011	0.011	0.04	0.011	0.113	0.133
15	-61.659	-61.924	-61.044	-61.713	-60.978	-61.689	-61.962	-61.324	30	-0.031	-0.008	-0.023	-0.011	-0.031	0	-0.007	-0.043	30	0.129	0.011	0.01	0.01	0.04	0.01	0.115	0.133
15.5	-61.6	-61.563	-60.803	-61.808	-61.144	-61.582	-62.011	-61.292	30.5	-0.029	-0.007	-0.022	-0.011	-0.033	0	-0.009	-0.042	30.5	0.13	0.012	0.009	0.009	0.039	0.009	0.128	0.133
16	-61.773	-61.064	-60.946	-61.933	-61.147	-61.865	-61.58	-61.021	31	-0.029	-0.007	-0.021	-0.011	-0.035	0	-0.01	-0.041	31	0.13	0.014	0.009	0.009	0.039	0.014	0.143	0.133
16.5	-61.432	-61.174	-61.235	-61.446	-61.334	-61.45	-61.687	-61.281	31.5	-0.029	-0.007	-0.02	-0.011	-0.037	0	-0.012	-0.04	31.5	0.13	0.016	0.008	0.008	0.039	0.02	0.155	0.132
17	-61.482	-61.563	-60.861	-61.444	-60.964	-61.879	-62.058	-60.7	32	-0.029	-0.006	-0.02	-0.011	-0.039	0	-0.014	-0.039	32	0.129	0.018	0.008	0.008	0.038	0.031	0.166	0.132
17.5	-61.368	-61.461	-60.594	-61.641	-59.986	-61.62	-62.003	-60.786	32.5	-0.029	-0.006	-0.019	-0.011	-0.04	0	-0.016	-0.039	32.5	0.134	0.02	0.007	0.007	0.038	0.043	0.176	0.131
18	-61.094	-60.882	-60.239	-61.689	-58.811	-61.554	-61.228	-60.621	33	-0.029	-0.006	-0.02	-0.011	-0.041	-0.004	-0.017	-0.038	33	0.14	0.022	0.007	0.007	0.037	0.055	0.187	0.132
18.5	-61.623	-61.181	-59.51	-61.7	-57.828	-61.581	-61.629	-60.878	33.5	-0.029	-0.006	-0.021	-0.011	-0.041	-0.007	-0.018	-0.039	33.5	0.146	0.024	0.007	0.007	0.038	0.072	0.197	0.134
19	-61.993	-61.204	-59.158	-62.159	-57.416	-61.537	-61.475	-60.732	34	-0.029	-0.005	-0.022	-0.012	-0.041	-0.013	-0.019	-0.041	34	0.151	0.026	0.006	0.006	0.04	0.091	0.204	0.139
19.5	-61.694	-61.289	-58.859	-61.68	-58.013	-61.68	-61.398	-60.746	34.5	-0.028	-0.005	-0.024	-0.016	-0.046	-0.018	-0.02	-0.042	34.5	0.158	0.027	0.006	0.006	0.042	0.106	0.21	0.144
20	-61.575	-60.932	-59.344	-61.721	-58.884	-61.83	-61.318	-60.477	35	-0.031	-0.005	-0.026	-0.02	-0.051	-0.022	-0.02	-0.043	35	0.165	0.037	0.005	0.005	0.043	0.118	0.213	0.149
20.5	-61.344	-60.623	-58.934	-61.633	-58.86	-61.383	-61.513	-60.415	35.5	-0.035	-0.005	-0.028	-0.023	-0.056	-0.025	-0.02	-0.044	35.5	0.172	0.049	0.005	0.005	0.045	0.126	0.215	0.155
21	-61.37	-60.431	-58.946	-61.382	-59.32	-60.952	-61.473	-59.273	36	-0.039	-0.004	-0.033	-0.026	-0.059	-0.028	-0.02	-0.045	36	0.179	0.059	0.005	0.005	0.046	0.133	0.217	0.161
21.5	-61.422	-60.154	-59.073	-61.321	-59.522	-61.407	-61.74	-58.491	36.5	-0.043	-0.004	-0.038	-0.028	-0.061	-0.031	-0.02	-0.045	36.5	0.188	0.066	0.005	0.005	0.047	0.138	0.217	0.166
22	-61.475	-59.49	-58.498	-61.439	-60.303	-61.308	-61.551	-57.657	37	-0.045	-0.004	-0.042	-0.029	-0.062	-0.033	-0.02	-0.045	37	0.196	0.072	0.004	0.004	0.048	0.141	0.218	0.171
22.5	-61.531	-58.288	-57.885	-61.512	-60.578	-60.977	-61.428	-57.267	37.5	-0.051	-0.009	-0.045	-0.03	-0.062	-0.035	-0.025	-0.044	37.5	0.202	0.076	0.004	0.004	0.049	0.144	0.217	0.174
23	-60.962	-58.217	-56.763	-61.793	-60.138	-61.128	-61.678	-58.017	38	-0.059	-0.015	-0.048	-0.031	-0.062	-0.036	-0.035	-0.044	38	0.208	0.079	0.004	0.004	0.049	0.145	0.217	0.177
23.5	-61.287	-58.174	-55.118	-61.73	-60.385	-61.587	-61.607	-58.37	38.5	-0.067	-0.021	-0.05	-0.033	-0.061	-0.037	-0.043	-0.043	38.5	0.213	0.081	0.004	0.004	0.05	0.146	0.216	0.179
24	-61.114	-58.652	-52.93	-61.454	-59.984	-61.767	-61.536	-58.6	39	-0.073	-0.024	-0.052	-0.035	-0.06	-0.04	-0.05	-0.042	39	0.217	0.082	0.003	0.003	0.05	0.147	0.215	0.181
24.5	-61.171	-58.848	-50.842	-61.066	-60.17	-61.825	-61.683	-59.023	39.5	-0.077	-0.027	-0.053	-0.036	-0.059	-0.043	-0.055	-0.042	39.5	0.22	0.087	0.003	0.003	0.05	0.147	0.215	0.182
25	-61.014	-59.195	-51.01	-61.752	-60.171	-61.77	-61.424	-59.327	40	-0.08	-0.029	-0.053	-0.037	-0.057	-0.045	-0.058	-0.042	40	0.222	0.093	0.004	0.003	0.05	0.146	0.215	0.183
25.5	-60.458	-59.811	-51.825	-61.569	-60.088	-61.414	-61.768	-59.152	40.5	-0.081	-0.031	-0.059	-0.037	-0.055	-0.047	-0.061	-0.042	40.5	0.224	0.098	0.006	0.003	0.05	0.146	0.216	0.183
26	-60.728	-59.741	-53.183	-61.409	-60.292	-61.424	-61.791	-59.502	41	-0.084	-0.031	-0.065	-0.04	-0.053	-0.049	-0.062	-0.042	41	0.226	0.103	0.009	0.006	0.05	0.145	0.216	0.186
26.5	-60.742	-60.091	-54.472	-61.31	-59.97	-61.575	-61.586	-59.094	41.5	-0.087	-0.031	-0.07	-0.042	-0.051	-0.05	-0.064	-0.044	41.5	0.235	0.106	0.012	0.011	0.05	0.144	0.216	0.19
27	-60.727	-60.114	-54.874	-61.232	-59.853	-61.912	-61.431	-59.22	42	-0.091	-0.032	-0.073	-0.045	-0.052	-0.051	-0.065	-0.045	42	0.244	0.109	0.015	0.018	0.05	0.142	0.216	0.195
27.5	-61.124	-60.3	-55.971	-60.441	-59.303	-61.658	-61.646	-59.388	42.5	-0.094	-0.034	-0.075	-0.047	-0.054	-0.052	-0.065	-0.047	42.5	0.251	0.111	0.018	0.026	0.053	0.141	0.216	0.198
28	-61.103	-60.275	-56.636	-61.019	-58.687	-61.772	-61.618	-59.455	43	-0.097	-0.035	-0.075	-0.05	-0.055	-0.057	-0.065	-0.048	43	0.256	0.115	0.021	0.033	0.057	0.139	0.215	0.201
28.5	-60.919	-60.188	-57.144	-60.173	-58.085	-61.808	-61.44	-58.88	43.5	-0.098	-0.035	-0.078	-0.052	-0.056	-0.062	-0.065	-0.05	43.5	0.259	0.119	0.023	0.04	0.06	0.138	0.214	0.202
29	-61.135	-60.299	-57.471	-59.296	-57.621	-61.79	-61.444	-59.314	44	-0.098	-0.036	-0.079	-0.053	-0.057	-0.066	-0.065	-0.054	44	0.265	0.123	0.026	0.046	0.064	0.136	0.213	0.203
29.5	-61.008	-60.683	-57.612	-57.77	-57.725	-61.719	-61.337	-59.429	44.5	-0.097	-0.036	-0.08	-0.058	-0.059	-0.069	-0.065	-0.057	44.5	0.269	0.126	0.027	0.052	0.066	0.134	0.211	0.203
30	-61.142	-60.277	-58.008	-57.024	-57.716	-61.463	-61.175	-59.697	45	-0.096	-0.036	-0.08	-0.063	-0.06	-0.074	-0.065	-0.059	45	0.272	0.129	0.029	0.057	0.068	0.132	0.21	0.203
30.5	-60.996	-60.936	-58.686	-57.395	-56.64	-61.449	-61.03	-60.236	45.5	-0.094	-0.039	-0.079	-0.068	-0.062	-0.078	-0.065	-0.06	45.5	0.275	0.132	0.031	0.061	0.07	0.13	0.208	0.202
31	-60.876	-60.666	-58.96	-58.004	-55.049	-61.566	-61.125	-60.286	46	-0.092	-0.042	-0.077	-0.071	-0.068	-0.081	-0.067	-0.06	46	0.276	0.134	0.032	0.064	0.071	0.129	0.206	0.201
31.5	-60.974	-61.077	-59.027	-58.486	-54.811	-61.206	-61.46	-59.966	46.5	-0.091	-0.045	-0.075	-0.074	-0.074	-0.083	-0.068	-0.06	46.5	0.279	0.135	0.033	0.068	0.072	0.129	0.204	0.2
32	-60.797	-60.783	-59.135	-59.254	-55.105	-61.471	-61.212	-60.118	47	-0.089	-0.046	-0.073	-0.075	-0.078	-0.083	-0.069	-0.06	47	0.283	0.136	0.034	0.07	0.072	0.129	0.202	0.198
32.5	-60.743	-60.663	-59.709	-59.533	-55.744	-61.392	-60.947	-60.216	47.5	-0.088	-0.054	-0.071	-0.075	-0.086	-0.083	-0.069	-0.059	47.5	0.285	0.136	0.036	0.073	0.073	0.13	0.203	0.197
33	-60.666	-60.956	-59.536	-59.922	-56.011	-61.599	-60.755	-60.007	48	-0.087	-0.063	-0.068	-0.08	-0.092	-0.082	-0.069	-0.059	48	0.287	0.137	0.038	0.075	0.073	0.136	0.21	0.195
33.5	-60.569	-60.679	-59.591	-60.193	-55.664	-61.54	-60.977	-60.093	48.5	-0.086	-0.07	-0.066	-0.087	-0.098	-0.08	-0.068	-0.061	48.5	0.289	0.137	0.041	0.076	0.073	0.147	0.217	0.193
34	-60.774	-61.194	-59.823	-59.716	-54.98	-61.131	-60.741	-60.566	49	-0.085	-0.074	-0.063	-0.092	-0.103	-0.081	-0.067	-0.062	49	0.293	0.136	0.043	0.078	0.073	0.16	0.223	0.191
34.5	-60.441	-60.858	-59.674	-60.246	-54.122	-60.77	-61.039	-60.423	49.5	-0.084	-0.077	-0.06	-0.099	-0.105	-0.081	-0.066	-0.063	49.5	0.297	0.136	0.045	0.079	0.073	0.171	0.228	0.19
35	-60.447	-60.824	-59.812	-60.01	-54.495	-61.07	-61.121	-60.125	50	-0.084	-0.079	-0.057	-0.103	-0.106	-0.08	-0.064	-0.065	50	0.3	0.135	0.047	0.079	0.079	0.181	0.232	0.188
35.5	-60.513	-61.063	-59.823	-59.909	-55.006	-60.697	-61.025	-60.258	50.5	-0.084	-0.079	-0.055	-0.105	-0.106	-0.079	-0.063	-0.065	50.5	0.301	0.134	0.049	0.08	0.087	0.188	0.236	0.186
36	-60.536	-61.139	-59.949	-59.464	-55.657	-60.863	-60.982	-60.353	51	-0.085	-0.078	-0.052	-0.106	-0.104	-0.077	-0.061	-0.065	51	0.301	0.133	0.05	0.08	0.095	0.194	0.239	0.192
36.5	-60.151	-61.085	-59.783	-60.341	-55.248	-60.626	-61.139	-60.621	51.5	-0.084	-0.077	-0.049	-0.105	-0.102	-0.076	-0.058	-0.069	51.5	0.303	0.132	0.051	0.081	0.104	0.198	0.241	0.2
37	-60.443	-61.33	-59.6	-60.369	-54.165	-60.676	-61.619	-60.395	52	-0.084	-0.075	-0.047	-0.104	-0.1	-0.078	-0.056	-0.074	52	0.305	0.131	0.052	0.081	0.112	0.201	0.242	0.208
37.5	-60.36	-61.072	-59.235	-59.998	-53.111	-60.685	-61.559	-60.871	52.5	-0.083	-0.073	-0.044	-0.101	-0.097	-0.082	-0.054	-0.077	52.5	0.307	0.129	0.053	0.081	0.119	0.203	0.242	0.213
38	-59.635	-61.086	-59.259	-60.24	-52.267	-60.443	-60.544	-60.779	53	-0.086	-0.071	-0.042	-0.099	-0.095	-0.085	-0.052	-0.078	53	0.308	0.129	0.053	0.083	0.125	0.205	0.247	0.217
38.5	-59.221	-60.649	-58.859	-60.522	-53.041	-59.938	-60.526	-60.697	53.5	-0.088	-0.068	-0.04	-0.097	-0.093	-0.087	-0.05	-0.079	53.5	0.308	0.13	0.054	0.087	0.13	0.206	0.255	0.219
39	-59.21	-60.819	-58.956	-59.947	-54.651	-59.67	-60.246	-60.506	54	-0.089	-0.065	-0.038	-0.095	-0.09	-0.088	-0.048	-0.078	54	0.308	0.13	0.054	0.089	0.134	0.207	0.262	0.223
39.5	-59.105	-60.621	-58.956	-59.727	-55.37	-59.054	-59.817	-60.582	54.5	-0.09	-0.064	-0.036	-0.094	-0.087	-0.089	-0.046	-0.077	54.5	0.307	0.13	0.054	0.092	0.137	0.207	0.267	0.227
40	-58.852	-60.287	-58.676	-59.216	-56.324	-58.525	-59.81	-60.806	55	-0.089	-0.063	-0.034	-0.092	-0.086	-0.089	-0.044	-0.075	55	0.305	0.13	0.054	0.093	0.139	0.207	0.271	0.23
40.5	-58.92	-60.451	-58.214	-58.459	-56.945	-57.479	-59.588	-60.511	55.5	-0.096	-0.061	-0.032	-0.089	-0.086	-0.089	-0.046	-0.073	55.5	0.303	0.129	0.054	0.094	0.141	0.209	0.274	0.232
41	-58.68	-60.144	-57.45	-57.999	-57.311	-55.877	-59.201	-60.798	56	-0.103	-0.06	-0.03	-0.092	-0.085	-0.089	-0.049	-0.071	56	0.305	0.129	0.054	0.095	0.143	0.211	0.275	0.234
41.5	-58.368	-60.133	-56.564	-58.47	-57.896	-55.411	-59.817	-60.703	56.5	-0.109	-0.058	-0.028	-0.093	-0.084	-0.089	-0.051	-0.07	56.5	0.306	0.128	0.054	0.096	0.146	0.214	0.275	0.245
42	-58.674	-60.352	-54.149	-58.595	-57.986	-56.414	-59.673	-61.394	57	-0.113	-0.057	-0.028	-0.093	-0.083	-0.089	-0.052	-0.069	57	0.308	0.127	0.054	0.096	0.149	0.217	0.275	0.255
42.5	-58.155	-60.139	-53.317	-58.497	-58.047	-56.6	-59.697	-61.221	57.5	-0.116	-0.056	-0.028	-0.092	-0.081	-0.09	-0.053	-0.067	57.5	0.308	0.126	0.053	0.096	0.151	0.22	0.275	0.262
43	-57.063	-60.276	-53.399	-58.251	-58.653	-57.747	-59.871	-61.244	58	-0.12	-0.055	-0.029	-0.09	-0.079	-0.091	-0.053	-0.065	58	0.307	0.124	0.053	0.096	0.153	0.222	0.274	0.266
43.5	-57.167	-60.022	-52.696	-57.822	-58.721	-57.602	-59.452	-61.065	58.5	-0.122	-0.055	-0.029	-0.088	-0.077	-0.094	-0.053	-0.063	58.5	0.306	0.123	0.053	0.097	0.155	0.223	0.272	0.269
44	-57.149	-60.915	-51.444	-56.691	-58.893	-57.478	-59.14	-60.716	59	-0.123	-0.058	-0.029	-0.086	-0.075	-0.097	-0.063	-0.064	59	0.305	0.122	0.052	0.1	0.156	0.223	0.27	0.272
44.5	-56.519	-60.569	-51.304	-56.57	-58.881	-57.293	-59.265	-60.63	59.5	-0.124	-0.061	-0.03	-0.091	-0.072	-0.098	-0.065	-0.064	59.5	0.304	0.12	0.054	0.102	0.156	0.223	0.271	0.276
45	-55.811	-60.614	-51.694	-56.506	-59.303	-56.033	-59.588	-60.13	60	-0.124	-0.068	-0.031	-0.094	-0.07	-0.1	-0.065	-0.064	60	0.303	0.124	0.058	0.104	0.156	0.223	0.273	0.278
45.5	-55.935	-60.42	-51.526	-56.52	-58.641	-55.027	-59.323	-60.458	60.5	-0.124	-0.072	-0.032	-0.095	-0.069	-0.101	-0.064	-0.064	60.5	0.302	0.131	0.062	0.106	0.156	0.222	0.275	0.282
46	-56.044	-60.115	-50.45	-56.841	-58.387	-54.274	-58.726	-60.685	61	-0.123	-0.074	-0.033	-0.095	-0.069	-0.102	-0.066	-0.063	61	0.3	0.136	0.065	0.108	0.156	0.22	0.276	0.285
46.5	-56.579	-60.04	-46.624	-57.34	-58.335	-53.25	-58.314	-60.861	61.5	-0.122	-0.076	-0.033	-0.096	-0.068	-0.102	-0.067	-0.062	61.5	0.298	0.14	0.067	0.109	0.156	0.219	0.276	0.289
47	-56.974	-60.237	-32.548	-57.278	-58.108	-52.774	-57.339	-60.41	62	-0.12	-0.076	-0.034	-0.101	-0.066	-0.103	-0.067	-0.06	62	0.296	0.143	0.069	0.11	0.155	0.217	0.277	0.292
47.5	-56.581	-59.941	12.5	-57.62	-57.889	-50.72	-55.97	-60.52	62.5	-0.118	-0.076	-0.034	-0.107	-0.067	-0.103	-0.067	-0.059	62.5	0.294	0.145	0.071	0.111	0.154	0.215	0.278	0.293
48	-56.296	-59.634	21.198	-57.328	-56.855	-45.772	-55.397	-60.339	63	-0.121	-0.075	-0.033	-0.112	-0.069	-0.103	-0.069	-0.058	63	0.292	0.158	0.074	0.111	0.153	0.213	0.282	0.294
48.5	-55.916	-59.54	-26.191	-57.394	-54.97	-29.246	-55.66	-60.686	63.5	-0.128	-0.074	-0.035	-0.115	-0.071	-0.103	-0.072	-0.058	63.5	0.29	0.171	0.079	0.111	0.152	0.211	0.285	0.295
49	-56.805	-59.436	-44.846	-57.45	-52.831	23.434	-56.925	-60.232	64	-0.134	-0.072	-0.036	-0.117	-0.074	-0.102	-0.077	-0.06	64	0.288	0.183	0.084	0.112	0.151	0.209	0.287	0.297
49.5	-57.175	-59.242	-54.052	-56.869	-50.496	19.677	-56.967	-60.289	64.5	-0.137	-0.07	-0.037	-0.121	-0.076	-0.1	-0.08	-0.063	64.5	0.287	0.195	0.088	0.114	0.153	0.208	0.288	0.297
50	-57.756	-59.2	-56.77	-56.671	-47.878	-29.007	-57.926	-60.09	65	-0.138	-0.071	-0.044	-0.123	-0.077	-0.103	-0.082	-0.065	65	0.285	0.205	0.092	0.115	0.157	0.207	0.288	0.298
50.5	-57.888	-59.028	-57.137	-55.668	-42.587	-47.752	-58.368	-59.88	65.5	-0.138	-0.074	-0.052	-0.123	-0.081	-0.106	-0.086	-0.066	65.5	0.287	0.213	0.095	0.117	0.16	0.207	0.288	0.298
51	-57.925	-59.011	-56.785	-54.259	-22.67	-55.389	-58.75	-59.438	66	-0.136	-0.075	-0.059	-0.123	-0.088	-0.108	-0.089	-0.067	66	0.298	0.229	0.097	0.118	0.164	0.207	0.288	0.297
51.5	-58.239	-58.951	-56.534	-52.89	36.475	-57.537	-59.225	-59.005	66.5	-0.133	-0.076	-0.065	-0.122	-0.093	-0.109	-0.09	-0.069	66.5	0.309	0.244	0.099	0.119	0.166	0.208	0.289	0.296
52	-58.408	-58.833	-56.677	-52.567	13.768	-58.018	-58.977	-59.17	67	-0.13	-0.076	-0.069	-0.12	-0.097	-0.108	-0.09	-0.071	67	0.322	0.256	0.101	0.12	0.174	0.209	0.29	0.295
52.5	-58.764	-58.998	-57.135	-52.887	-34.643	-57.224	-59.142	-59.254	67.5	-0.126	-0.084	-0.072	-0.117	-0.099	-0.113	-0.091	-0.072	67.5	0.332	0.265	0.102	0.121	0.182	0.215	0.291	0.294
53	-58.815	-58.963	-57.875	-53.641	-54.653	-57.439	-59.325	-59.115	68	-0.122	-0.091	-0.074	-0.115	-0.101	-0.118	-0.094	-0.073	68	0.338	0.271	0.103	0.121	0.187	0.222	0.293	0.293
53.5	-58.914	-59.213	-58.301	-54.063	-58.971	-57.456	-59.406	-59.105	68.5	-0.117	-0.096	-0.075	-0.111	-0.109	-0.12	-0.096	-0.073	68.5	0.343	0.274	0.107	0.121	0.191	0.229	0.294	0.292
54	-59.004	-59.332	-58.889	-54.254	-58.542	-57.892	-60.147	-59.286	69	-0.115	-0.1	-0.077	-0.108	-0.115	-0.121	-0.097	-0.073	69	0.349	0.277	0.111	0.121	0.194	0.234	0.295	0.29
54.5	-59.163	-60.119	-58.732	-54.591	-58.181	-58.139	-59.937	-59.71	69.5	-0.112	-0.103	-0.078	-0.104	-0.119	-0.121	-0.097	-0.072	69.5	0.353	0.277	0.115	0.121	0.196	0.239	0.294	0.289
55	-59.172	-59.473	-59.121	-54.634	-58.518	-58.465	-59.67	-60.013	70	-0.116	-0.105	-0.079	-0.101	-0.121	-0.12	-0.1	-0.071	70	0.355	0.277	0.117	0.121	0.197	0.242	0.293	0.287
55.5	-59.254	-59.566	-59.898	-54.736	-58.993	-58.565	-59.702	-59.584	70.5	-0.118	-0.109	-0.084	-0.097	-0.122	-0.118	-0.101	-0.07	70.5	0.356	0.277	0.118	0.12	0.198	0.244	0.292	0.284
56	-59.167	-59.642	-60.244	-54.681	-58.81	-58.595	-60.084	-59.364	71	-0.123	-0.111	-0.093	-0.093	-0.127	-0.115	-0.1	-0.068	71	0.358	0.278	0.119	0.119	0.198	0.246	0.29	0.282
56.5	-59.279	-59.886	-60.587	-54.539	-58.76	-59.141	-60.401	-59.493	71.5	-0.127	-0.112	-0.099	-0.09	-0.131	-0.112	-0.099	-0.067	71.5	0.359	0.283	0.12	0.141	0.202	0.248	0.288	0.279
57	-58.787	-59.825	-60.996	-54.639	-59.319	-59.137	-60.13	-59.484	72	-0.128	-0.115	-0.103	-0.088	-0.134	-0.109	-0.097	-0.065	72	0.358	0.288	0.12	0.162	0.206	0.251	0.286	0.279
57.5	-58.8	-59.957	-61.063	-55.426	-59.182	-59.489	-60.257	-60.25	72.5	-0.127	-0.118	-0.105	-0.088	-0.139	-0.107	-0.095	-0.063	72.5	0.358	0.293	0.12	0.178	0.21	0.256	0.284	0.28
58	-58.698	-59.711	-61.264	-56.181	-59.282	-59.139	-60.176	-60.421	73	-0.125	-0.119	-0.106	-0.089	-0.141	-0.105	-0.097	-0.061	73	0.357	0.299	0.12	0.189	0.214	0.26	0.282	0.279
58.5	-58.008	-59.768	-61.297	-56.276	-60.02	-59.614	-60.713	-60.206	73.5	-0.123	-0.119	-0.106	-0.088	-0.145	-0.104	-0.097	-0.059	73.5	0.356	0.304	0.125	0.197	0.217	0.264	0.281	0.278
59	-57.776	-60.011	-61.169	-56.833	-60.219	-59.634	-60.307	-60.068	74	-0.119	-0.118	-0.105	-0.087	-0.156	-0.103	-0.098	-0.057	74	0.354	0.307	0.13	0.202	0.218	0.267	0.281	0.277
59.5	-57.311	-60.023	-61.367	-57.457	-60.631	-60.068	-60.182	-60.12	74.5	-0.119	-0.117	-0.104	-0.086	-0.16	-0.101	-0.1	-0.055	74.5	0.353	0.309	0.133	0.206	0.219	0.272	0.289	0.275
60	-56.659	-59.499	-61.265	-57.326	-60.777	-60.019	-59.914	-60.02	75	-0.118	-0.116	-0.104	-0.086	-0.161	-0.099	-0.103	-0.053	75	0.353	0.317	0.135	0.209	0.219	0.285	0.298	0.273
60.5	-56.963	-59.17	-61.413	-57.532	-60.918	-59.664	-59.8	-59.851	75.5	-0.117	-0.115	-0.104	-0.086	-0.163	-0.097	-0.105	-0.052	75.5	0.352	0.325	0.136	0.21	0.219	0.297	0.305	0.271
61	-56.897	-59.005	-61.633	-57.427	-60.846	-59.642	-59.438	-60.453	76	-0.125	-0.112	-0.104	-0.086	-0.165	-0.094	-0.107	-0.052	76	0.351	0.329	0.136	0.21	0.218	0.306	0.322	0.275
61.5	-57.644	-59.119	-61.756	-57.593	-61.12	-59.593	-59.205	-60.157	76.5	-0.132	-0.11	-0.112	-0.085	-0.165	-0.099	-0.11	-0.054	76.5	0.35	0.332	0.136	0.21	0.217	0.311	0.338	0.28
62	-58.002	-58.779	-61.607	-57.197	-61.165	-59.941	-59.213	-60.365	77	-0.136	-0.107	-0.114	-0.083	-0.163	-0.102	-0.113	-0.056	77	0.348	0.333	0.138	0.21	0.22	0.316	0.35	0.284
62.5	-58.437	-58.237	-61.583	-56.966	-61.309	-60.033	-59.366	-60.438	77.5	-0.137	-0.105	-0.114	-0.082	-0.161	-0.105	-0.122	-0.057	77.5	0.347	0.336	0.146	0.209	0.224	0.319	0.359	0.286
63	-58.355	-57.45	-61.78	-56.495	-61.175	-60.025	-59.839	-60.329	78	-0.137	-0.102	-0.113	-0.08	-0.165	-0.108	-0.131	-0.058	78	0.345	0.339	0.154	0.207	0.227	0.321	0.366	0.288
63.5	-58.123	-56.68	-61.859	-54.77	-61.227	-60.293	-59.435	-60.702	78.5	-0.136	-0.099	-0.112	-0.077	-0.166	-0.112	-0.137	-0.058	78.5	0.343	0.34	0.161	0.206	0.229	0.322	0.371	0.289
64	-58.124	-56.126	-61.816	-52.96	-61.367	-60.254	-59.473	-60.496	79	-0.134	-0.103	-0.11	-0.075	-0.165	-0.114	-0.141	-0.058	79	0.341	0.344	0.166	0.204	0.23	0.323	0.374	0.291
64.5	-57.806	-55.713	-62.221	-52.052	-60.989	-60.426	-59.378	-60.442	79.5	-0.131	-0.106	-0.108	-0.072	-0.162	-0.116	-0.143	-0.057	79.5	0.339	0.347	0.17	0.202	0.23	0.322	0.376	0.292
65	-57.698	-56.138	-62.08	-50.617	-60.485	-60.648	-59.482	-60.508	80	-0.128	-0.106	-0.106	-0.071	-0.158	-0.116	-0.143	-0.056	80	0.336	0.349	0.173	0.2	0.23	0.323	0.377	0.295
65.5	-57.529	-56.604	-61.668	-48.379	-60.014	-60.3	-59.267	-60.283	80.5	-0.124	-0.105	-0.104	-0.07	-0.154	-0.125	-0.142	-0.057	80.5	0.337	0.349	0.175	0.198	0.232	0.323	0.378	0.296
66	-57.426	-57.364	-61.445	-39.721	-59.7	-60.248	-58.783	-59.956	81	-0.12	-0.103	-0.105	-0.068	-0.15	-0.133	-0.14	-0.059	81	0.339	0.348	0.177	0.195	0.249	0.323	0.378	0.297
66.5	-57.719	-57.654	-61.282	-14.616	-58.93	-60.168	-58.709	-59.623	81.5	-0.116	-0.1	-0.105	-0.073	-0.154	-0.138	-0.139	-0.059	81.5	0.339	0.35	0.178	0.193	0.265	0.322	0.377	0.297
67	-57.982	-58.228	-60.898	38.641	-58.228	-60.444	-58.536	-59.74	82	-0.111	-0.097	-0.105	-0.077	-0.166	-0.141	-0.137	-0.063	82	0.344	0.351	0.178	0.19	0.277	0.322	0.375	0.306
67.5	-57.956	-58.327	-61.002	6.379	-57.361	-60.8	-58.2	-59.912	82.5	-0.107	-0.094	-0.104	-0.083	-0.179	-0.141	-0.135	-0.072	82.5	0.348	0.352	0.178	0.187	0.285	0.326	0.374	0.318
68	-58.39	-57.943	-60.655	-37.663	-57.218	-60.464	-57.564	-60.342	83	-0.107	-0.09	-0.105	-0.096	-0.193	-0.14	-0.132	-0.079	83	0.35	0.353	0.178	0.184	0.29	0.33	0.38	0.33
68.5	-58.917	-57.951	-59.496	-55.225	-57.787	-59.847	-57.502	-59.752	83.5	-0.106	-0.086	-0.105	-0.101	-0.2	-0.138	-0.129	-0.084	83.5	0.35	0.354	0.178	0.182	0.293	0.333	0.383	0.343
69	-58.565	-57.93	-58.481	-57.6	-57.653	-60.4	-56.631	-59.652	84	-0.105	-0.089	-0.104	-0.102	-0.205	-0.136	-0.125	-0.087	84	0.349	0.354	0.177	0.179	0.295	0.335	0.384	0.353
69.5	-58.669	-58.209	-56.966	-57.459	-57.265	-60.032	-56.278	-59.738	84.5	-0.103	-0.095	-0.111	-0.102	-0.206	-0.136	-0.127	-0.089	84.5	0.348	0.353	0.176	0.176	0.31	0.336	0.383	0.36
70	-58.961	-58.107	-56.833	-57.248	-57.113	-59.851	-56.496	-60.232	85	-0.1	-0.099	-0.115	-0.1	-0.204	-0.136	-0.129	-0.089	85	0.346	0.352	0.175	0.173	0.325	0.336	0.382	0.364
70.5	-58.84	-57.64	-57.512	-58.54	-57.273	-60.266	-56.102	-60.67	85.5	-0.097	-0.1	-0.117	-0.098	-0.201	-0.136	-0.131	-0.096	85.5	0.343	0.35	0.174	0.17	0.337	0.336	0.381	0.366
71	-59.281	-57.201	-57.719	-58.737	-57.213	-60.369	-56.782	-60.278	86	-0.094	-0.102	-0.117	-0.096	-0.199	-0.135	-0.139	-0.101	86	0.34	0.348	0.172	0.17	0.344	0.335	0.379	0.369
71.5	-59.496	-56.225	-58.217	-59.176	-57.408	-60.433	-57.43	-60.587	86.5	-0.091	-0.122	-0.116	-0.093	-0.196	-0.133	-0.141	-0.104	86.5	0.337	0.346	0.171	0.171	0.355	0.339	0.383	0.37
72	-59.504	-54.532	-58.485	-59.282	-57.185	-60.249	-57.723	-60.481	87	-0.088	-0.134	-0.118	-0.09	-0.193	-0.13	-0.14	-0.105	87	0.334	0.343	0.174	0.171	0.363	0.343	0.387	0.37
72.5	-59.566	-54.72	-59.004	-59.405	-55.882	-60.621	-57.866	-60.082	87.5	-0.085	-0.14	-0.118	-0.086	-0.19	-0.127	-0.138	-0.104	87.5	0.338	0.34	0.177	0.171	0.368	0.345	0.389	0.371
73	-59.495	-55.437	-58.721	-59.786	-54.219	-60.138	-57.495	-60.399	88	-0.081	-0.142	-0.116	-0.083	-0.185	-0.126	-0.135	-0.103	88	0.343	0.337	0.178	0.17	0.378	0.345	0.389	0.371
73.5	-59.218	-56.33	-58.973	-59.804	-53.492	-60.283	-57.184	-60.53	88.5	-0.078	-0.142	-0.114	-0.079	-0.186	-0.124	-0.136	-0.101	88.5	0.352	0.334	0.179	0.169	0.387	0.344	0.388	0.371
74	-59.699	-57.296	-59.113	-60.053	-53.269	-60.806	-57.544	-60.582	89	-0.075	-0.14	-0.11	-0.076	-0.185	-0.13	-0.136	-0.098	89	0.358	0.331	0.178	0.167	0.393	0.344	0.387	0.37
74.5	-59.79	-57.188	-58.981	-59.716	-52.439	-60.68	-57.427	-60.612	89.5	-0.071	-0.136	-0.107	-0.078	-0.186	-0.13	-0.135	-0.095	89.5	0.364	0.327	0.178	0.166	0.395	0.344	0.384	0.369
75	-59.68	-57.525	-59.578	-60.005	-50.691	-60.796	-58.383	-60.78	90	-0.068	-0.132	-0.103	-0.098	-0.184	-0.128	-0.133	-0.092	90	0.368	0.323	0.177	0.164	0.396	0.343	0.381	0.367
75.5	-59.202	-57.533	-59.422	-60.226	-46.805	-60.898	-58.173	-61.013	90.5	-0.065	-0.132	-0.104	-0.105	-0.185	-0.125	-0.13	-0.088	90.5	0.371	0.319	0.176	0.162	0.401	0.342	0.378	0.365
76	-59.232	-58.068	-59.169	-59.914	-31.958	-60.809	-58.773	-60.541	91	-0.066	-0.132	-0.107	-0.106	-0.183	-0.125	-0.129	-0.085	91	0.372	0.316	0.175	0.159	0.407	0.341	0.374	0.362
76.5	-59.159	-58.382	-58.59	-60.431	16.054	-61.04	-58.826	-60.544	91.5	-0.068	-0.13	-0.11	-0.104	-0.18	-0.13	-0.127	-0.081	91.5	0.371	0.314	0.187	0.162	0.41	0.339	0.371	0.36
77	-59.19	-58.659	-58.561	-60.412	21.194	-60.708	-58.619	-61.045	92	-0.068	-0.128	-0.111	-0.102	-0.175	-0.136	-0.125	-0.086	92	0.37	0.313	0.2	0.167	0.411	0.336	0.367	0.357
77.5	-59.151	-58.736	-58.116	-60.887	-27.023	-60.726	-58.657	-60.492	92.5	-0.069	-0.124	-0.11	-0.098	-0.17	-0.145	-0.122	-0.085	92.5	0.369	0.312	0.209	0.171	0.411	0.343	0.363	0.367
78	-58.92	-59.418	-57.881	-61.201	-46.437	-60.543	-58.937	-60.701	93	-0.07	-0.12	-0.109	-0.094	-0.164	-0.153	-0.118	-0.09	93	0.367	0.31	0.217	0.174	0.41	0.351	0.359	0.374
78.5	-59.369	-59.234	-57.822	-60.721	-54.809	-60.173	-58.971	-60.652	93.5	-0.07	-0.116	-0.106	-0.09	-0.158	-0.159	-0.12	-0.093	93.5	0.376	0.307	0.224	0.176	0.408	0.367	0.355	0.378
79	-58.716	-59.28	-57.865	-60.298	-57.101	-60.218	-58.754	-60.577	94	-0.07	-0.112	-0.103	-0.085	-0.152	-0.167	-0.121	-0.095	94	0.38	0.304	0.229	0.177	0.405	0.376	0.35	0.38
79.5	-59.008	-59.161	-57.823	-60.46	-58.462	-60.681	-58.5	-60.474	94.5	-0.069	-0.107	-0.1	-0.081	-0.145	-0.172	-0.12	-0.104	94.5	0.381	0.301	0.232	0.178	0.402	0.381	0.346	0.379
80	-59.525	-59.426	-58.15	-60.645	-58.813	-60.533	-58.573	-60.386	95	-0.068	-0.102	-0.096	-0.077	-0.139	-0.174	-0.118	-0.109	95	0.38	0.298	0.234	0.179	0.398	0.384	0.342	0.38
80.5	-59.543	-59.478	-58.356	-59.93	-59.063	-60.26	-58.454	-60.38	95.5	-0.066	-0.097	-0.092	-0.072	-0.132	-0.185	-0.115	-0.112	95.5	0.377	0.294	0.234	0.18	0.394	0.386	0.337	0.38
81	-59.484	-59.693	-58.67	-60.004	-58.869	-60.187	-58.863	-60.221	96	-0.078	-0.093	-0.088	-0.068	-0.126	-0.191	-0.111	-0.113	96	0.375	0.29	0.234	0.181	0.39	0.387	0.333	0.378
81.5	-59.477	-59.688	-58.717	-60.221	-59.09	-59.997	-58.654	-60.744	96.5	-0.095	-0.088	-0.093	-0.067	-0.12	-0.192	-0.107	-0.115	96.5	0.371	0.286	0.234	0.181	0.386	0.387	0.328	0.388
82	-59.634	-59.816	-59.016	-60.544	-58.617	-59.772	-58.459	-60.749	97	-0.104	-0.084	-0.094	-0.066	-0.121	-0.195	-0.103	-0.12	97	0.369	0.282	0.232	0.18	0.39	0.386	0.324	0.398
82.5	-59.686	-60.085	-59.022	-60.569	-58.299	-59.492	-58.773	-60.167	97.5	-0.109	-0.079	-0.093	-0.065	-0.126	-0.198	-0.102	-0.123	97.5	0.366	0.278	0.231	0.179	0.395	0.394	0.319	0.405
83	-59.377	-60.145	-58.415	-60.324	-58.048	-59.324	-58.826	-59.588	98	-0.111	-0.075	-0.102	-0.064	-0.128	-0.199	-0.1	-0.124	98	0.364	0.274	0.229	0.178	0.397	0.398	0.316	0.409
83.5	-60.079	-60.056	-57.577	-59.393	-57.619	-59.262	-58.975	-59.704	98.5	-0.121	-0.071	-0.107	-0.09	-0.127	-0.198	-0.097	-0.124	98.5	0.361	0.27	0.227	0.177	0.397	0.398	0.316	0.411
84	-59.761	-59.846	-57.243	-59.278	-57.881	-59.536	-58.904	-59.385	99	-0.123	-0.067	-0.112	-0.106	-0.125	-0.195	-0.094	-0.122	99	0.358	0.266	0.232	0.176	0.395	0.397	0.317	0.411
84.5	-60.438	-59.818	-56.418	-59.581	-57.649	-59.467	-59.231	-59.343	99.5	-0.121	-0.063	-0.113	-0.114	-0.122	-0.19	-0.09	-0.12	99.5	0.354	0.262	0.235	0.174	0.392	0.409	0.316	0.41
85	-59.976	-59.416	-56.849	-59.73	-57.711	-59.457	-59.147	-59.811	100	-0.118	-0.059	-0.113	-0.119	-0.118	-0.185	-0.087	-0.117	100	0.35	0.257	0.241	0.172	0.389	0.423	0.314	0.408
85.5	-60.285	-58.957	-57.431	-59.38	-57.228	-58.798	-59.177	-59.676	100.5	-0.114	-0.056	-0.111	-0.122	-0.113	-0.187	-0.086	-0.114	100.5	0.349	0.253	0.246	0.17	0.384	0.432	0.312	0.405
86	-60.035	-58.683	-57.765	-59.626	-57.285	-58.769	-58.938	-59.696	101	-0.115	-0.055	-0.108	-0.126	-0.108	-0.184	-0.085	-0.115	101	0.369	0.249	0.249	0.168	0.379	0.437	0.309	0.402
86.5	-60.043	-58.507	-58.203	-60.323	-56.766	-59.17	-59.146	-59.452	101.5	-0.114	-0.054	-0.105	-0.129	-0.107	-0.178	-0.084	-0.116	101.5	0.392	0.244	0.251	0.166	0.374	0.439	0.306	0.398
87	-60.571	-57.934	-58.313	-60.267	-56.994	-59.157	-59.06	-59.141	102	-0.112	-0.054	-0.108	-0.129	-0.105	-0.172	-0.083	-0.115	102	0.405	0.24	0.252	0.164	0.369	0.439	0.324	0.394
87.5	-60.346	-57.363	-58.619	-60.209	-56.878	-59.547	-58.9	-59.268	102.5	-0.109	-0.053	-0.107	-0.131	-0.101	-0.165	-0.08	-0.112	102.5	0.427	0.235	0.265	0.162	0.364	0.45	0.339	0.392
88	-60.221	-56.944	-58.067	-59.852	-57.425	-59.649	-59.514	-58.885	103	-0.105	-0.052	-0.104	-0.131	-0.097	-0.158	-0.089	-0.11	103	0.462	0.231	0.273	0.159	0.358	0.459	0.348	0.391
88.5	-59.869	-56.604	-58.384	-60.13	-57.09	-59.887	-59.175	-59.453	103.5	-0.102	-0.052	-0.1	-0.129	-0.112	-0.151	-0.094	-0.106	103.5	0.49	0.227	0.277	0.157	0.352	0.462	0.354	0.39
89	-59.991	-56.096	-58.67	-60.142	-56.929	-59.134	-58.815	-59.433	104	-0.098	-0.053	-0.096	-0.127	-0.114	-0.145	-0.095	-0.102	104	0.507	0.232	0.278	0.155	0.347	0.463	0.358	0.388
89.5	-60.41	-55.822	-58.657	-60.463	-56.702	-59.09	-58.876	-59.272	104.5	-0.094	-0.052	-0.103	-0.127	-0.116	-0.138	-0.094	-0.098	104.5	0.518	0.238	0.278	0.152	0.341	0.462	0.358	0.386
90	-60.465	-55.262	-58.799	-60.406	-56.469	-59.205	-59.069	-59.295	105	-0.09	-0.052	-0.103	-0.127	-0.119	-0.131	-0.091	-0.098	105	0.524	0.243	0.278	0.15	0.335	0.459	0.357	0.383
90.5	-60.39	-55.218	-59.122	-59.704	-57.398	-58.866	-59.277	-59.355	105.5	-0.086	-0.055	-0.101	-0.125	-0.12	-0.125	-0.088	-0.096	105.5	0.526	0.245	0.276	0.147	0.329	0.456	0.355	0.379
91	-60.506	-54.031	-58.996	-59.438	-57.759	-59.357	-58.897	-59.421	106	-0.085	-0.056	-0.098	-0.123	-0.119	-0.119	-0.084	-0.093	106	0.526	0.247	0.275	0.145	0.323	0.452	0.352	0.375
91.5	-60.46	-53.831	-58.992	-59.232	-58.179	-59.142	-58.608	-59.892	106.5	-0.097	-0.057	-0.095	-0.12	-0.116	-0.113	-0.08	-0.09	106.5	0.524	0.256	0.272	0.142	0.317	0.447	0.363	0.371
92	-60.466	-53.204	-59.136	-59.337	-58.929	-59.298	-58.623	-59.58	107	-0.102	-0.058	-0.092	-0.116	-0.113	-0.107	-0.076	-0.086	107	0.527	0.265	0.27	0.14	0.311	0.441	0.374	0.373
92.5	-60.301	-52.853	-59.011	-59.055	-59.27	-58.689	-58.745	-59.476	107.5	-0.104	-0.057	-0.102	-0.134	-0.109	-0.101	-0.074	-0.083	107.5	0.526	0.272	0.267	0.137	0.305	0.435	0.388	0.375
93	-60.001	-53.038	-59.048	-59.047	-59.295	-58.06	-59.152	-59.561	108	-0.104	-0.057	-0.106	-0.147	-0.105	-0.096	-0.076	-0.079	108	0.523	0.279	0.264	0.135	0.299	0.429	0.4	0.376
93.5	-60.283	-53.929	-58.702	-59.284	-59.311	-57.874	-58.927	-59.285	108.5	-0.112	-0.061	-0.106	-0.151	-0.1	-0.091	-0.076	-0.075	108.5	0.519	0.284	0.261	0.132	0.293	0.423	0.408	0.375
94	-60.251	-54.896	-58.509	-59.389	-59.391	-57.495	-58.563	-59.468	109	-0.115	-0.063	-0.104	-0.194	-0.095	-0.086	-0.079	-0.072	109	0.533	0.287	0.258	0.13	0.287	0.416	0.413	0.405
94.5	-60.433	-55.454	-57.335	-59.224	-60.089	-57.44	-58.19	-59.394	109.5	-0.129	-0.065	-0.12	-0.193	-0.091	-0.081	-0.079	-0.068	109.5	0.542	0.288	0.255	0.127	0.281	0.41	0.436	0.438
95	-60.104	-56.194	-56.982	-59.562	-60.491	-57.328	-57.582	-58.836	110	-0.134	-0.068	-0.126	-0.185	-0.09	-0.085	-0.078	-0.065	110	0.55	0.287	0.251	0.125	0.275	0.403	0.455	0.487
95.5	-60.114	-56.443	-55.785	-60.199	-60.553	-56.806	-57.127	-58.867	110.5	-0.134	-0.07	-0.133	-0.177	-0.089	-0.089	-0.077	-0.065	110.5	0.554	0.286	0.274	0.122	0.269	0.405	0.466	0.521
96	-59.592	-57.007	-54.366	-60.042	-60.763	-56.483	-57.269	-58.277	111	-0.141	-0.073	-0.137	-0.175	-0.131	-0.091	-0.075	-0.064	111	0.554	0.284	0.292	0.12	0.264	0.406	0.481	0.542
96.5	-59.002	-57.155	-53.033	-60.446	-61.185	-56.23	-57.344	-58.939	111.5	-0.143	-0.12	-0.138	-0.171	-0.13	-0.092	-0.073	-0.064	111.5	0.551	0.282	0.302	0.117	0.258	0.404	0.526	0.555
97	-58.755	-57.602	-52.88	-60.525	-61.01	-55.718	-57.24	-58.962	112	-0.143	-0.122	-0.14	-0.171	-0.125	-0.092	-0.09	-0.063	112	0.546	0.371	0.307	0.115	0.252	0.401	0.555	0.561
97.5	-58.375	-58.082	-53.969	-60.434	-60.713	-54.974	-58.132	-58.6	112.5	-0.142	-0.119	-0.14	-0.171	-0.118	-0.1	-0.094	-0.062	112.5	0.541	0.406	0.309	0.112	0.246	0.397	0.603	0.564
98	-57.741	-58.427	-53.551	-60.344	-60.925	-54.749	-58.048	-58.697	113	-0.139	-0.119	-0.146	-0.17	-0.115	-0.103	-0.095	-0.08	113	0.534	0.416	0.308	0.11	0.241	0.392	0.636	0.564
98.5	-57.322	-58.568	-52.311	-59.435	-61.014	-54.081	-58.217	-58.41	113.5	-0.135	-0.124	-0.15	-0.167	-0.159	-0.103	-0.094	-0.085	113.5	0.528	0.418	0.306	0.108	0.323	0.386	0.652	0.562
99	-56.989	-58.989	-52.382	-58.969	-61.017	-54.59	-58.258	-58.599	114	-0.137	-0.126	-0.151	-0.18	-0.163	-0.102	-0.092	-0.087	114	0.526	0.416	0.303	0.126	0.355	0.381	0.738	0.583
99.5	-56.024	-58.96	-53.259	-58.85	-60.728	-54.512	-58.608	-58.459	114.5	-0.134	-0.127	-0.161	-0.193	-0.16	-0.107	-0.089	-0.096	114.5	0.531	0.411	0.3	0.142	0.379	0.379	0.771	0.592
100	-53.604	-59.51	-53.966	-58.312	-60.865	-54.643	-59.106	-58.58	115	-0.129	-0.126	-0.164	-0.196	-0.154	-0.108	-0.086	-0.102	115	0.535	0.405	0.296	0.158	0.39	0.377	0.806	0.598
100.5	-50.516	-59.381	-54.014	-58.336	-61.085	-54.79	-59.301	-58.999	115.5	-0.124	-0.123	-0.17	-0.193	-0.147	-0.117	-0.083	-0.105	115.5	0.537	0.398	0.291	0.17	0.393	0.374	0.915	0.623
101	-47.876	-59.467	-53.907	-57.731	-61.265	-55.234	-59.461	-58.902	116	-0.127	-0.12	-0.214	-0.203	-0.145	-0.122	-0.08	-0.115	116	0.616	0.391	0.299	0.179	0.392	0.371	0.96	0.636
101.5	-46.805	-59.811	-52.663	-57.347	-61.046	-55.878	-59.34	-58.735	116.5	-0.169	-0.115	-0.217	-0.213	-0.151	-0.123	-0.087	-0.139	116.5	0.648	0.383	0.341	0.188	0.388	0.385	0.972	0.639
102	-46.139	-60.277	-49.317	-57.13	-61.139	-56.494	-59.35	-59.316	117	-0.167	-0.111	-0.214	-0.216	-0.151	-0.121	-0.101	-0.146	117	0.677	0.375	0.367	0.196	0.382	0.399	0.976	0.663
102.5	-45.382	-59.862	-46.369	-57.19	-61.051	-56.75	-59.269	-59.151	117.5	-0.16	-0.106	-0.207	-0.216	-0.148	-0.119	-0.158	-0.147	117.5	0.711	0.397	0.38	0.202	0.375	0.439	0.972	0.678
103	-44.896	-59.816	-44.638	-57.046	-61.247	-57.212	-59.201	-58.783	118	-0.153	-0.101	-0.2	-0.213	-0.142	-0.115	-0.188	-0.145	118	0.731	0.43	0.386	0.206	0.374	0.47	0.964	0.683
103.5	-43.057	-59.652	-41.68	-56.769	-60.746	-56.966	-59.176	-59.003	118.5	-0.152	-0.1	-0.191	-0.225	-0.136	-0.11	-0.201	-0.142	118.5	0.74	0.449	0.388	0.209	0.375	0.489	0.953	0.683
104	-37.074	-59.67	-31.927	-56.251	-60.413	-57.924	-58.979	-59.525	119	-0.15	-0.098	-0.187	-0.223	-0.129	-0.11	-0.223	-0.137	119	0.742	0.458	0.388	0.21	0.375	0.499	0.945	0.678
104.5	-8.716	-59.619	14.422	-56.238	-59.846	-58.294	-58.99	-59.493	119.5	-0.145	-0.097	-0.184	-0.216	-0.166	-0.111	-0.231	-0.132	119.5	0.74	0.462	0.386	0.211	0.372	0.504	0.958	0.672
105	37.447	-59.718	21.38	-55.919	-59.698	-58.562	-59.14	-59.084	120	-0.139	-0.096	-0.179	-0.208	-0.159	-0.117	-0.235	-0.139	120	0.735	0.461	0.383	0.21	0.367	0.505	0.962	0.664
105.5	-4.042	-60.111	-29.065	-54.692	-59.675	-58.683	-59.187	-59.239	120.5	-0.132	-0.094	-0.172	-0.199	-0.173	-0.123	-0.234	-0.14	120.5	0.729	0.459	0.395	0.209	0.361	0.503	0.958	0.655
106	-36.405	-59.799	-46.727	-53.631	-59.383	-58.797	-59.225	-59.283	121	-0.13	-0.1	-0.165	-0.189	-0.175	-0.129	-0.229	-0.137	121	0.721	0.462	0.404	0.208	0.354	0.5	0.95	0.656
106.5	-52.375	-59.895	-53.111	-53.103	-59.145	-59.045	-58.957	-59.164	121.5	-0.134	-0.111	-0.16	-0.18	-0.171	-0.136	-0.222	-0.135	121.5	0.713	0.463	0.408	0.206	0.347	0.495	0.939	0.659
107	-54.949	-59.779	-54.611	-52.284	-59.139	-59.16	-59.166	-59.027	122	-0.139	-0.119	-0.161	-0.17	-0.164	-0.184	-0.229	-0.139	122	0.704	0.461	0.408	0.204	0.356	0.49	0.927	0.66
107.5	-54.133	-59.6	-55.242	-49.469	-59.242	-59.536	-59.523	-59.443	122.5	-0.141	-0.126	-0.17	-0.16	-0.166	-0.186	-0.229	-0.14	122.5	0.694	0.538	0.405	0.201	0.365	0.484	0.914	0.665
108	-55.467	-59.558	-56.036	-41.833	-59.155	-59.911	-59.207	-59.602	123	-0.14	-0.145	-0.185	-0.15	-0.163	-0.181	-0.225	-0.138	123	0.684	0.569	0.402	0.206	0.369	0.478	0.904	0.668
108.5	-56.651	-59.513	-56.741	-18.417	-58.918	-60.172	-59.087	-59.305	123.5	-0.137	-0.156	-0.192	-0.141	-0.158	-0.175	-0.232	-0.134	123.5	0.68	0.579	0.397	0.213	0.37	0.476	0.895	0.667
109	-57.5	-59.637	-57.046	38.036	-59.467	-60.308	-59.275	-59.144	124	-0.145	-0.162	-0.193	-0.132	-0.151	-0.167	-0.247	-0.129	124	0.675	0.58	0.391	0.218	0.367	0.473	0.883	0.663
109.5	-58.033	-59.624	-57.333	10.395	-59.529	-60.542	-59.005	-59.54	124.5	-0.149	-0.164	-0.207	-0.125	-0.143	-0.159	-0.248	-0.125	124.5	0.668	0.582	0.385	0.222	0.363	0.473	0.87	0.669
110	-58.165	-59.495	-57.424	-35.386	-59.65	-60.077	-59.065	-60.013	125	-0.149	-0.162	-0.212	-0.119	-0.135	-0.151	-0.242	-0.128	125	0.672	0.583	0.378	0.224	0.358	0.471	0.856	0.67
110.5	-58.452	-59.195	-57.644	-54.059	-59.435	-59.771	-58.866	-60.203	125.5	-0.151	-0.166	-0.211	-0.115	-0.127	-0.161	-0.276	-0.143	125.5	0.675	0.582	0.371	0.225	0.352	0.468	0.847	0.666
111	-58.208	-59.329	-57.253	-58.06	-58.725	-60.194	-59.202	-60.627	126	-0.15	-0.166	-0.207	-0.111	-0.118	-0.159	-0.266	-0.164	126	0.677	0.578	0.364	0.224	0.348	0.463	0.837	0.675
111.5	-58.252	-58.365	-57.542	-57.917	-58.105	-59.597	-59.491	-59.961	126.5	-0.15	-0.163	-0.217	-0.112	-0.11	-0.153	-0.252	-0.17	126.5	0.676	0.573	0.357	0.223	0.345	0.458	0.826	0.68
112	-58.27	-57.593	-56.979	-58.259	-58.224	-59.616	-59.12	-60.34	127	-0.149	-0.176	-0.215	-0.113	-0.103	-0.154	-0.237	-0.182	127	0.698	0.602	0.357	0.221	0.341	0.453	0.813	0.687
112.5	-57.97	-57.605	-56.796	-57.782	-58.268	-59.348	-58.98	-60.312	127.5	-0.146	-0.182	-0.209	-0.119	-0.106	-0.153	-0.231	-0.187	127.5	0.708	0.623	0.358	0.219	0.338	0.447	0.803	0.692
113	-58.265	-57.457	-55.412	-57.776	-58.263	-59.367	-58.748	-59.613	128	-0.15	-0.181	-0.202	-0.125	-0.111	-0.15	-0.223	-0.187	128	0.795	0.632	0.365	0.216	0.333	0.442	0.793	0.692
113.5	-58.17	-57.677	-53.051	-57.318	-56.893	-59.29	-58.501	-59.507	128.5	-0.156	-0.179	-0.193	-0.131	-0.112	-0.145	-0.214	-0.183	128.5	0.829	0.632	0.372	0.213	0.336	0.436	0.784	0.69
114	-58.462	-57.478	-51.831	-56.597	-56.672	-59.201	-58.613	-58.858	129	-0.176	-0.179	-0.184	-0.134	-0.11	-0.144	-0.204	-0.178	129	0.837	0.632	0.377	0.21	0.339	0.429	0.774	0.69
114.5	-58.557	-57.169	-52.306	-56.316	-56.32	-58.744	-58.733	-58.491	129.5	-0.181	-0.177	-0.174	-0.134	-0.107	-0.146	-0.193	-0.179	129.5	0.835	0.63	0.378	0.207	0.339	0.423	0.763	0.69
115	-58.61	-56.756	-52.011	-55.484	-56.648	-58.219	-58.806	-58.524	130	-0.181	-0.173	-0.164	-0.133	-0.119	-0.165	-0.182	-0.182	130	0.828	0.626	0.378	0.203	0.337	0.416	0.751	0.688
115.5	-58.739	-55.973	-52.349	-55.38	-56.171	-57.154	-59.353	-58.628	130.5	-0.178	-0.168	-0.155	-0.13	-0.119	-0.172	-0.17	-0.185	130.5	0.818	0.619	0.384	0.2	0.334	0.41	0.739	0.684
116	-59.06	-54.856	-50.952	-54.631	-55.446	-56.111	-59.614	-58.309	131	-0.174	-0.161	-0.145	-0.127	-0.116	-0.172	-0.159	-0.185	131	0.807	0.68	0.39	0.196	0.331	0.403	0.726	0.679
116.5	-58.402	-52.496	-49.645	-54.295	-53.659	-55.953	-59.415	-57.633	131.5	-0.175	-0.164	-0.136	-0.126	-0.112	-0.168	-0.149	-0.183	131.5	0.796	0.701	0.394	0.193	0.326	0.396	0.713	0.672
117	-58.15	-51.842	-50.222	-53.915	-51.635	-56.213	-58.943	-57.716	132	-0.173	-0.162	-0.13	-0.125	-0.108	-0.162	-0.138	-0.179	132	0.787	0.703	0.395	0.189	0.321	0.389	0.7	0.665
117.5	-58.27	-53.229	-51.342	-53.283	-51.002	-57.366	-58.295	-57.472	132.5	-0.168	-0.202	-0.129	-0.122	-0.104	-0.17	-0.131	-0.174	132.5	0.779	0.697	0.394	0.185	0.316	0.383	0.686	0.657
118	-58.283	-54.643	-52.661	-51.926	-51.117	-58.195	-57.559	-57.727	133	-0.163	-0.21	-0.129	-0.124	-0.099	-0.181	-0.125	-0.167	133	0.77	0.687	0.391	0.182	0.311	0.436	0.673	0.648
118.5	-58.809	-55.799	-53.881	-49.844	-52.4	-58.501	-56.772	-57.448	133.5	-0.156	-0.208	-0.128	-0.124	-0.094	-0.181	-0.125	-0.171	133.5	0.76	0.675	0.386	0.178	0.306	0.472	0.675	0.64
119	-58.778	-57.448	-54.75	-47.451	-53.468	-58.555	-56.267	-57.66	134	-0.15	-0.242	-0.164	-0.123	-0.089	-0.176	-0.126	-0.169	134	0.749	0.662	0.381	0.174	0.3	0.491	0.673	0.63
119.5	-59.119	-57.755	-55.382	-44.013	-53.568	-58.606	-56.139	-58.106	134.5	-0.142	-0.237	-0.163	-0.121	-0.084	-0.169	-0.126	-0.165	134.5	0.738	0.652	0.384	0.17	0.294	0.499	0.668	0.621
120	-59.233	-58.014	-56.404	-35.005	-53.479	-58.531	-56.156	-57.696	135	-0.183	-0.227	-0.17	-0.136	-0.079	-0.16	-0.123	-0.16	135	0.727	0.643	0.388	0.167	0.289	0.502	0.662	0.612
120.5	-59.255	-58.292	-56.76	-0.142	-53.41	-58.805	-55.983	-57.603	135.5	-0.184	-0.214	-0.178	-0.142	-0.074	-0.151	-0.126	-0.155	135.5	0.715	0.634	0.388	0.163	0.283	0.501	0.653	0.602
121	-59.749	-58.338	-56.894	26.456	-53.356	-58.648	-55.874	-57.81	136	-0.181	-0.202	-0.181	-0.142	-0.07	-0.142	-0.127	-0.155	136	0.703	0.625	0.388	0.159	0.277	0.498	0.646	0.593
121.5	-59.636	-58.087	-57.095	-21.958	-53.586	-58.568	-56.237	-57.794	136.5	-0.181	-0.189	-0.18	-0.138	-0.066	-0.133	-0.126	-0.155	136.5	0.691	0.615	0.386	0.156	0.271	0.503	0.645	0.59
122	-59.526	-58.216	-57.207	-41.667	-53.497	-57.075	-55.342	-57.408	137	-0.178	-0.177	-0.177	-0.133	-0.061	-0.14	-0.126	-0.153	137	0.681	0.604	0.391	0.152	0.265	0.507	0.644	0.589
122.5	-58.992	-57.768	-57.329	-54.148	-54.082	-56.088	-54.338	-57.621	137.5	-0.173	-0.165	-0.179	-0.126	-0.057	-0.138	-0.125	-0.162	137.5	0.673	0.593	0.395	0.148	0.26	0.508	0.641	0.587
123	-58.772	-57.327	-56.96	-55.447	-54.245	-56.228	-53.772	-57.939	138	-0.168	-0.153	-0.179	-0.119	-0.054	-0.132	-0.128	-0.163	138	0.663	0.582	0.475	0.145	0.254	0.516	0.636	0.583
123.5	-58.654	-56.949	-56.474	-55.476	-54.276	-55.955	-52.491	-57.979	138.5	-0.163	-0.142	-0.185	-0.156	-0.05	-0.125	-0.129	-0.16	138.5	0.653	0.57	0.509	0.175	0.248	0.52	0.63	0.578
124	-58.635	-56.816	-56.051	-55.341	-55.007	-56.472	-51.288	-58.033	139	-0.158	-0.135	-0.185	-0.15	-0.047	-0.129	-0.142	-0.158	139	0.643	0.559	0.521	0.198	0.242	0.52	0.623	0.571
124.5	-58.921	-55.722	-55.031	-56.198	-55.456	-56.648	-48.794	-58.333	139.5	-0.152	-0.129	-0.182	-0.144	-0.043	-0.131	-0.145	-0.155	139.5	0.631	0.547	0.523	0.209	0.237	0.517	0.614	0.569
125	-59.08	-53.683	-53.279	-56.864	-55.61	-56.988	-46.4	-58.203	140	-0.145	-0.123	-0.177	-0.153	-0.04	-0.13	-0.148	-0.151	140	0.62	0.535	0.519	0.214	0.231	0.512	0.606	0.566
125.5	-59.15	-50.931	-51.406	-57.479	-56.243	-56.863	-42.082	-58.321	140.5	-0.139	-0.117	-0.171	-0.153	-0.038	-0.127	-0.148	-0.146	140.5	0.609	0.524	0.513	0.214	0.225	0.507	0.597	0.572
126	-59.016	-49.332	-48.158	-57.559	-56.591	-56.58	-29.441	-57.504	141	-0.132	-0.11	-0.164	-0.162	-0.036	-0.123	-0.146	-0.14	141	0.598	0.512	0.505	0.212	0.22	0.5	0.591	0.575
126.5	-59.207	-49.692	-44.867	-57.54	-56.978	-56.94	22.519	-57.056	141.5	-0.125	-0.103	-0.157	-0.16	-0.035	-0.118	-0.146	-0.143	141.5	0.586	0.5	0.497	0.208	0.215	0.493	0.586	0.574
127	-58.857	-50.543	-38.451	-57.446	-57.452	-56.907	17.784	-57.045	142	-0.123	-0.1	-0.153	-0.155	-0.041	-0.113	-0.145	-0.142	142	0.575	0.489	0.488	0.204	0.209	0.486	0.579	0.57
127.5	-59.415	-51.92	-12.281	-57.099	-58.146	-57.003	-31.875	-57.211	142.5	-0.12	-0.097	-0.15	-0.147	-0.047	-0.107	-0.143	-0.138	142.5	0.564	0.478	0.479	0.2	0.204	0.478	0.572	0.565
128	-59.26	-53.125	38.544	-57.6	-58.455	-57.057	-49.291	-57.091	143	-0.117	-0.102	-0.146	-0.139	-0.051	-0.101	-0.139	-0.133	143	0.553	0.466	0.469	0.195	0.199	0.47	0.564	0.559
128.5	-59.431	-54.371	1.358	-57.552	-58.202	-57.245	-53.48	-56.786	143.5	-0.113	-0.105	-0.14	-0.133	-0.056	-0.095	-0.136	-0.127	143.5	0.542	0.455	0.459	0.191	0.194	0.462	0.556	0.552
129	-59.133	-55.079	-38.698	-58.148	-58.131	-57.421	-54.234	-57.347	144	-0.109	-0.107	-0.134	-0.127	-0.061	-0.089	-0.134	-0.12	144	0.531	0.444	0.45	0.186	0.189	0.454	0.549	0.546
129.5	-58.744	-55.211	-55.329	-58.082	-58.558	-57.42	-54.086	-57.161	144.5	-0.106	-0.106	-0.128	-0.121	-0.064	-0.083	-0.13	-0.114	144.5	0.523	0.433	0.44	0.181	0.184	0.446	0.541	0.538
130	-58.511	-55.547	-57.437	-58.38	-58.564	-57.027	-53.437	-57.376	145	-0.102	-0.105	-0.122	-0.115	-0.066	-0.078	-0.127	-0.107	145	0.516	0.422	0.43	0.184	0.179	0.437	0.533	0.531
130.5	-58.79	-56.253	-57.698	-57.692	-58.043	-56.7	-54.179	-57.018	145.5	-0.098	-0.122	-0.119	-0.109	-0.069	-0.072	-0.124	-0.101	145.5	0.514	0.412	0.421	0.188	0.174	0.429	0.54	0.523
131	-58.544	-56.663	-57.344	-56.808	-58.414	-56.477	-55.237	-56.926	146	-0.094	-0.128	-0.117	-0.118	-0.074	-0.071	-0.121	-0.095	146	0.513	0.402	0.411	0.19	0.202	0.42	0.544	0.516
131.5	-58.767	-56.675	-57.787	-54.895	-58.542	-56.618	-56.301	-57.499	146.5	-0.09	-0.128	-0.113	-0.122	-0.079	-0.086	-0.117	-0.089	146.5	0.51	0.394	0.407	0.192	0.223	0.415	0.544	0.532
132	-58.455	-57.224	-58.333	-51.333	-58.538	-56.417	-57.171	-57.825	147	-0.09	-0.125	-0.109	-0.15	-0.101	-0.092	-0.113	-0.083	147	0.507	0.386	0.405	0.192	0.233	0.411	0.542	0.546
132.5	-58.322	-56.145	-58.709	-45.842	-58.745	-56.259	-57.731	-57.499	147.5	-0.09	-0.12	-0.104	-0.16	-0.113	-0.092	-0.109	-0.091	147.5	0.531	0.378	0.401	0.191	0.244	0.406	0.538	0.552
133	-58.588	-55.732	-59.527	-40.737	-59.063	-55.766	-58.001	-57.984	148	-0.089	-0.114	-0.114	-0.163	-0.118	-0.091	-0.104	-0.112	148	0.55	0.37	0.397	0.189	0.252	0.4	0.533	0.577
133.5	-58.663	-55.474	-59.276	-26.449	-59.2	-55.655	-58.167	-58.29	148.5	-0.087	-0.107	-0.119	-0.161	-0.119	-0.088	-0.099	-0.12	148.5	0.558	0.362	0.391	0.186	0.257	0.394	0.526	0.59
134	-58.485	-54.369	-58.511	29.389	-59.126	-56.102	-58.724	-58.181	149	-0.084	-0.101	-0.118	-0.158	-0.121	-0.084	-0.094	-0.12	149	0.559	0.355	0.385	0.184	0.26	0.387	0.519	0.592
134.5	-58.895	-53.998	-58.125	16.289	-59.031	-56.298	-58.625	-58.02	149.5	-0.081	-0.094	-0.13	-0.152	-0.121	-0.079	-0.09	-0.126	149.5	0.555	0.349	0.378	0.181	0.26	0.38	0.512	0.588
135	-57.947	-54.01	-57.864	-33.977	-59.317	-56.613	-58.343	-57.813	150	-0.078	-0.088	-0.132	-0.147	-0.12	-0.075	-0.085	-0.126	150	0.549	0.343	0.371	0.179	0.258	0.373	0.504	0.581
135.5	-57.526	-54.57	-57.913	-52.727	-59.1	-56.952	-58.616	-57.637	150.5	-0.074	-0.082	-0.13	-0.141	-0.117	-0.07	-0.08	-0.124	150.5	0.541	0.368	0.364	0.178	0.256	0.365	0.496	0.589
136	-57.681	-54.705	-58.268	-57.378	-59.68	-56.976	-59.012	-58.016	151	-0.071	-0.076	-0.124	-0.135	-0.114	-0.073	-0.076	-0.122	151	0.533	0.385	0.356	0.178	0.252	0.358	0.489	0.596
136.5	-57.67	-55.228	-57.821	-58.074	-59.714	-57.035	-58.6	-58.506	151.5	-0.067	-0.075	-0.117	-0.129	-0.11	-0.077	-0.073	-0.118	151.5	0.524	0.393	0.348	0.178	0.248	0.357	0.487	0.597
137	-57.402	-55.768	-57.66	-57.666	-60.345	-57.177	-58.813	-58.155	152	-0.063	-0.076	-0.109	-0.122	-0.106	-0.085	-0.08	-0.113	152	0.515	0.394	0.341	0.177	0.249	0.359	0.486	0.594
137.5	-57.563	-56.31	-57.741	-56.323	-60.609	-57.416	-59.123	-57.995	152.5	-0.06	-0.077	-0.101	-0.116	-0.101	-0.09	-0.085	-0.107	152.5	0.505	0.393	0.333	0.176	0.252	0.359	0.483	0.589
138	-57.478	-56.881	-58.138	-55.178	-60.443	-57.689	-59.257	-58.42	153	-0.056	-0.083	-0.094	-0.11	-0.114	-0.094	-0.087	-0.102	153	0.495	0.389	0.325	0.175	0.254	0.357	0.478	0.581
138.5	-57.661	-56.812	-57.853	-54.242	-60.483	-57.936	-59.575	-58.221	153.5	-0.074	-0.089	-0.087	-0.107	-0.119	-0.097	-0.088	-0.103	153.5	0.486	0.384	0.318	0.173	0.255	0.353	0.472	0.573
139	-57.913	-56.879	-58.121	-54.412	-60.715	-57.787	-59.23	-58.351	154	-0.089	-0.093	-0.08	-0.104	-0.117	-0.098	-0.092	-0.103	154	0.476	0.379	0.31	0.171	0.283	0.349	0.465	0.57
139.5	-58.323	-57.476	-58.128	-55.054	-60.463	-57.882	-59.643	-58.263	154.5	-0.097	-0.098	-0.074	-0.102	-0.113	-0.098	-0.096	-0.1	154.5	0.467	0.373	0.303	0.169	0.302	0.343	0.459	0.567
140	-58.692	-57.639	-57.42	-55.963	-61.128	-57.824	-59.887	-58.469	155	-0.1	-0.108	-0.068	-0.098	-0.108	-0.097	-0.097	-0.097	155	0.457	0.382	0.296	0.167	0.312	0.338	0.451	0.561
140.5	-59.087	-57.783	-57.766	-56.204	-61.234	-58.008	-59.496	-58.29	155.5	-0.101	-0.115	-0.069	-0.095	-0.101	-0.095	-0.097	-0.092	155.5	0.465	0.387	0.288	0.165	0.316	0.332	0.444	0.554
141	-58.805	-57.864	-57.822	-56.468	-61.534	-57.842	-59.331	-58.185	156	-0.1	-0.119	-0.071	-0.09	-0.095	-0.092	-0.095	-0.095	156	0.471	0.388	0.281	0.162	0.315	0.325	0.436	0.546
141.5	-59.137	-58.369	-58.255	-56.785	-61.357	-58.523	-59.245	-58.562	156.5	-0.097	-0.121	-0.073	-0.086	-0.088	-0.089	-0.093	-0.097	156.5	0.471	0.385	0.274	0.159	0.313	0.319	0.429	0.538
142	-58.942	-58.522	-57.983	-56.827	-61.389	-58.718	-59.358	-58.619	157	-0.093	-0.136	-0.073	-0.082	-0.082	-0.088	-0.09	-0.097	157	0.467	0.392	0.267	0.157	0.309	0.318	0.421	0.529
142.5	-59.118	-58.437	-57.943	-57.192	-60.971	-58.539	-59.65	-58.26	157.5	-0.09	-0.149	-0.073	-0.077	-0.081	-0.088	-0.094	-0.097	157.5	0.46	0.4	0.26	0.154	0.305	0.322	0.413	0.519
143	-59.125	-58.444	-58.039	-57.747	-60.552	-58.5	-59.729	-58.708	158	-0.087	-0.155	-0.072	-0.073	-0.08	-0.101	-0.096	-0.1	158	0.452	0.404	0.253	0.151	0.3	0.327	0.406	0.51
143.5	-59.186	-57.852	-58.62	-58.034	-60.373	-58.538	-59.923	-58.226	158.5	-0.084	-0.155	-0.07	-0.072	-0.078	-0.109	-0.095	-0.101	158.5	0.443	0.404	0.247	0.148	0.295	0.33	0.399	0.501
144	-59.099	-57.915	-59.1	-58.541	-59.967	-58.641	-59.436	-58.448	159	-0.081	-0.152	-0.076	-0.075	-0.075	-0.111	-0.094	-0.101	159	0.434	0.402	0.24	0.145	0.289	0.331	0.391	0.491
144.5	-59.383	-58.556	-59.925	-58.578	-59.277	-59.191	-59.799	-58.342	159.5	-0.077	-0.147	-0.079	-0.078	-0.073	-0.11	-0.091	-0.1	159.5	0.425	0.399	0.234	0.142	0.283	0.354	0.384	0.487
145	-59.756	-58.273	-59.867	-58.984	-58.327	-59.335	-59.822	-59.25	160	-0.074	-0.14	-0.08	-0.079	-0.071	-0.107	-0.087	-0.097	160	0.416	0.408	0.228	0.139	0.278	0.397	0.377	0.483
145.5	-60.288	-57.676	-60.166	-59.044	-57.258	-59.166	-60.15	-58.982	160.5	-0.071	-0.133	-0.08	-0.079	-0.069	-0.102	-0.083	-0.094	160.5	0.407	0.415	0.221	0.136	0.272	0.425	0.37	0.479
146	-60.207	-57.259	-60.222	-59.389	-56.79	-59.38	-60.441	-59.451	161	-0.067	-0.126	-0.078	-0.078	-0.067	-0.097	-0.079	-0.09	161	0.398	0.415	0.215	0.133	0.266	0.447	0.363	0.474
146.5	-60.415	-56.991	-60.233	-59.266	-56.887	-59.302	-60.072	-59.375	161.5	-0.069	-0.118	-0.075	-0.076	-0.065	-0.092	-0.075	-0.09	161.5	0.389	0.413	0.209	0.13	0.26	0.457	0.356	0.468
147	-60.2	-56.499	-60.422	-58.966	-56.877	-59.115	-60.233	-59.611	162	-0.072	-0.111	-0.072	-0.076	-0.062	-0.086	-0.071	-0.09	162	0.391	0.408	0.203	0.127	0.254	0.459	0.349	0.462
147.5	-60.324	-56.545	-60.047	-58.453	-56.636	-58.993	-60.442	-59.225	162.5	-0.073	-0.104	-0.069	-0.077	-0.06	-0.08	-0.066	-0.089	162.5	0.407	0.409	0.198	0.124	0.248	0.456	0.342	0.456
148	-60.099	-56.333	-60.237	-58.033	-55.585	-59.037	-60.485	-59.115	163	-0.072	-0.111	-0.068	-0.076	-0.058	-0.09	-0.062	-0.086	163	0.421	0.41	0.206	0.121	0.243	0.453	0.335	0.45
148.5	-60.476	-55.766	-59.978	-57.214	-54.227	-58.88	-60.655	-58.494	163.5	-0.071	-0.113	-0.068	-0.075	-0.055	-0.096	-0.059	-0.083	163.5	0.429	0.408	0.214	0.119	0.237	0.449	0.328	0.444
149	-60.694	-53.414	-59.971	-57.023	-52.719	-59.397	-60.884	-58.402	164	-0.069	-0.116	-0.067	-0.073	-0.053	-0.098	-0.056	-0.08	164	0.432	0.405	0.219	0.116	0.231	0.445	0.321	0.437
149.5	-60.477	-50.204	-59.701	-56.868	-50.215	-59.48	-60.694	-58.3	164.5	-0.066	-0.116	-0.065	-0.071	-0.05	-0.11	-0.054	-0.076	164.5	0.431	0.4	0.222	0.113	0.225	0.441	0.314	0.43
150	-60.496	-48.439	-59.062	-55.174	-46.223	-59.255	-60.922	-57.832	165	-0.08	-0.114	-0.064	-0.068	-0.048	-0.114	-0.052	-0.072	165	0.428	0.395	0.222	0.11	0.22	0.438	0.321	0.427
150.5	-60.579	-48.038	-59.123	-51.836	-39.165	-59.452	-61.185	-57.964	165.5	-0.09	-0.109	-0.061	-0.065	-0.045	-0.135	-0.059	-0.068	165.5	0.423	0.389	0.22	0.107	0.214	0.437	0.332	0.425
151	-60.835	-48.79	-59.128	-49.762	-16.835	-59.33	-61.668	-58.205	166	-0.095	-0.104	-0.059	-0.062	-0.043	-0.147	-0.08	-0.064	166	0.418	0.383	0.218	0.105	0.208	0.434	0.337	0.425
151.5	-61.297	-51.072	-58.875	-48.582	39.539	-58.946	-61.795	-58.395	166.5	-0.095	-0.098	-0.058	-0.059	-0.051	-0.152	-0.091	-0.06	166.5	0.411	0.376	0.215	0.102	0.203	0.43	0.339	0.424
152	-61.13	-52.628	-58.806	-48.7	8.87	-58.926	-61.36	-57.946	167	-0.094	-0.092	-0.057	-0.056	-0.056	-0.152	-0.095	-0.056	167	0.404	0.37	0.211	0.1	0.197	0.425	0.339	0.42
152.5	-60.561	-54.105	-58.515	-50	-37.02	-58.95	-60.957	-58.335	167.5	-0.091	-0.086	-0.055	-0.053	-0.059	-0.149	-0.094	-0.056	167.5	0.397	0.363	0.207	0.097	0.192	0.42	0.338	0.415
153	-60.937	-54.746	-58.8	-50.632	-54.562	-58.378	-60.766	-58.631	168	-0.087	-0.08	-0.054	-0.051	-0.064	-0.144	-0.091	-0.057	168	0.39	0.356	0.203	0.094	0.187	0.422	0.337	0.43
153.5	-60.583	-54.551	-58.734	-50.535	-57.193	-57.902	-61.036	-59.103	168.5	-0.089	-0.074	-0.053	-0.05	-0.073	-0.137	-0.087	-0.056	168.5	0.382	0.349	0.198	0.092	0.182	0.423	0.334	0.439
154	-60.125	-54.09	-58.816	-47.564	-57.266	-56.96	-60.646	-59.045	169	-0.091	-0.068	-0.051	-0.048	-0.081	-0.13	-0.082	-0.056	169	0.374	0.342	0.194	0.09	0.177	0.423	0.331	0.442
154.5	-59.801	-53.724	-59.43	-43.329	-56.693	-55.854	-60.23	-58.884	169.5	-0.09	-0.063	-0.049	-0.047	-0.086	-0.123	-0.077	-0.055	169.5	0.367	0.336	0.189	0.087	0.172	0.42	0.328	0.439
155	-59.362	-50.791	-59.908	-34.358	-57.302	-53.481	-60.038	-58.715	170	-0.087	-0.058	-0.047	-0.046	-0.088	-0.115	-0.074	-0.053	170	0.359	0.329	0.185	0.085	0.167	0.415	0.323	0.435
155.5	-59.433	-45.574	-60.022	4.425	-58.369	-50.273	-60.123	-58.804	170.5	-0.084	-0.053	-0.045	-0.044	-0.106	-0.107	-0.072	-0.051	170.5	0.351	0.322	0.18	0.083	0.162	0.41	0.319	0.428
156	-59.334	-36.087	-60.151	24.101	-58.302	-45.514	-60.006	-58.958	171	-0.08	-0.049	-0.043	-0.043	-0.116	-0.1	-0.077	-0.049	171	0.344	0.315	0.175	0.08	0.157	0.404	0.314	0.421
156.5	-59.616	-3.83	-60.228	-24.272	-58.411	-36.764	-60.344	-58.647	171.5	-0.091	-0.045	-0.05	-0.043	-0.118	-0.093	-0.081	-0.047	171.5	0.336	0.308	0.171	0.078	0.153	0.397	0.31	0.414
157	-60.014	31.214	-60.464	-43.141	-58.993	-4.974	-60.701	-58.46	172	-0.093	-0.041	-0.055	-0.042	-0.117	-0.086	-0.082	-0.044	172	0.328	0.302	0.166	0.076	0.148	0.391	0.305	0.407
157.5	-59.236	-12.652	-60.356	-52.588	-59.264	34.196	-60.406	-58.794	172.5	-0.092	-0.037	-0.057	-0.042	-0.115	-0.079	-0.081	-0.042	172.5	0.321	0.295	0.162	0.074	0.144	0.384	0.3	0.399
158	-59.557	-33.801	-59.693	-54.614	-59.519	-10.94	-60.286	-58.56	173	-0.088	-0.034	-0.056	-0.041	-0.114	-0.073	-0.079	-0.044	173	0.314	0.288	0.158	0.072	0.139	0.377	0.294	0.392
158.5	-59.754	-49.725	-58.94	-55.218	-59.498	-34.017	-60.506	-58.782	173.5	-0.083	-0.031	-0.055	-0.041	-0.112	-0.067	-0.076	-0.047	173.5	0.306	0.282	0.153	0.07	0.135	0.37	0.289	0.384
159	-59.189	-54.989	-57.417	-55.646	-59.806	-50.548	-60.388	-58.412	174	-0.078	-0.028	-0.052	-0.04	-0.11	-0.061	-0.073	-0.048	174	0.299	0.275	0.149	0.068	0.131	0.363	0.284	0.377
159.5	-59.616	-55.565	-55.801	-55.627	-59.83	-56.318	-60.461	-58.348	174.5	-0.073	-0.035	-0.05	-0.062	-0.116	-0.056	-0.069	-0.049	174.5	0.292	0.269	0.145	0.066	0.127	0.356	0.279	0.369
160	-59.985	-56.267	-53.635	-55.817	-60.313	-56.278	-60.455	-58.431	175	-0.07	-0.039	-0.047	-0.077	-0.12	-0.051	-0.066	-0.048	175	0.285	0.262	0.141	0.064	0.123	0.349	0.274	0.362
160.5	-59.688	-56.759	-52.321	-56.785	-59.904	-56.715	-60.45	-58.581	175.5	-0.067	-0.041	-0.044	-0.084	-0.12	-0.047	-0.062	-0.064	175.5	0.278	0.256	0.137	0.062	0.144	0.357	0.268	0.354
161	-59.127	-57.237	-50.075	-57.539	-60.681	-57.306	-60.76	-58.745	176	-0.064	-0.041	-0.041	-0.086	-0.118	-0.043	-0.058	-0.072	176	0.271	0.25	0.133	0.06	0.161	0.362	0.263	0.347
161.5	-58.728	-58.041	-46.382	-58.595	-60.765	-57.877	-60.851	-59.166	176.5	-0.061	-0.039	-0.039	-0.085	-0.114	-0.039	-0.055	-0.074	176.5	0.264	0.244	0.129	0.058	0.169	0.363	0.258	0.34
162	-58.09	-58.318	-38.97	-59.187	-60.344	-58.95	-60.928	-59.211	177	-0.058	-0.037	-0.036	-0.083	-0.109	-0.035	-0.051	-0.073	177	0.257	0.238	0.125	0.057	0.172	0.36	0.253	0.332
162.5	-57.172	-58.918	-17.317	-59.369	-60.325	-59.204	-60.934	-58.507	177.5	-0.056	-0.035	-0.034	-0.086	-0.104	-0.032	-0.048	-0.069	177.5	0.277	0.232	0.121	0.055	0.172	0.355	0.248	0.325
163	-56.914	-58.754	39.185	-59.774	-59.78	-59.437	-61.411	-58.084	178	-0.053	-0.033	-0.031	-0.087	-0.099	-0.029	-0.044	-0.065	178	0.289	0.226	0.118	0.053	0.169	0.349	0.242	0.318
163.5	-56.864	-59.333	8.747	-60.04	-59.558	-59.166	-61.153	-58.109	178.5	-0.05	-0.031	-0.029	-0.086	-0.094	-0.026	-0.041	-0.061	178.5	0.295	0.22	0.114	0.052	0.167	0.343	0.237	0.311
164	-57.545	-59.084	-37.165	-60.396	-58.933	-59.513	-61.097	-57.056	179	-0.048	-0.029	-0.027	-0.083	-0.088	-0.024	-0.038	-0.057	179	0.298	0.214	0.111	0.05	0.163	0.337	0.232	0.304
164.5	-58.085	-58.92	-54.593	-60.894	-58.935	-59.558	-61.318	-56.514	179.5	-0.045	-0.026	-0.025	-0.08	-0.083	-0.022	-0.036	-0.052	179.5	0.299	0.209	0.107	0.048	0.159	0.33	0.227	0.311
165	-57.864	-59.485	-56.23	-61.159	-59.134	-58.979	-61.161	-56.612	180	-0.043	-0.024	-0.023	-0.076	-0.078	-0.02	-0.033	-0.048	180	0.298	0.203	0.104	0.047	0.156	0.323	0.223	0.32
165.5	-58.042	-59.598	-55.493	-61.122	-59.415	-59.019	-61.241	-56.224	180.5	-0.042	-0.023	-0.021	-0.072	-0.073	-0.018	-0.03	-0.044	180.5	0.296	0.197	0.101	0.046	0.152	0.317	0.218	0.325
166	-58.19	-59.912	-54.975	-61.673	-59.968	-59.001	-61.141	-56.025	181	-0.042	-0.021	-0.02	-0.068	-0.068	-0.016	-0.028	-0.04	181	0.292	0.192	0.097	0.044	0.148	0.31	0.213	0.327
166.5	-58.383	-60.266	-56.121	-61.893	-60.515	-58.396	-60.261	-55.891	181.5	-0.043	-0.019	-0.018	-0.064	-0.063	-0.014	-0.026	-0.036	181.5	0.289	0.187	0.094	0.043	0.144	0.304	0.208	0.327
167	-58.332	-60.355	-57.736	-61.91	-60.643	-58.8	-60.096	-56.534	182	-0.043	-0.018	-0.017	-0.06	-0.059	-0.013	-0.024	-0.033	182	0.284	0.182	0.091	0.041	0.14	0.297	0.203	0.328
167.5	-58.692	-60.326	-58.404	-62.616	-60.65	-58.23	-59.672	-57.467	182.5	-0.043	-0.016	-0.015	-0.056	-0.055	-0.012	-0.022	-0.03	182.5	0.28	0.177	0.088	0.04	0.136	0.291	0.199	0.329
168	-59.243	-60.598	-58.79	-62.91	-60.186	-58.883	-59.28	-57.935	183	-0.043	-0.015	-0.014	-0.052	-0.051	-0.011	-0.02	-0.027	183	0.275	0.172	0.086	0.039	0.133	0.284	0.194	0.327
168.5	-59.208	-60.726	-59.28	-62.731	-59.895	-58.896	-59.773	-58.314	183.5	-0.042	-0.014	-0.013	-0.048	-0.047	-0.01	-0.018	-0.025	183.5	0.27	0.167	0.083	0.037	0.129	0.278	0.19	0.325
169	-59.019	-61.224	-59.535	-62.925	-59.999	-59.354	-59.629	-58.88	184	-0.041	-0.012	-0.012	-0.045	-0.044	-0.009	-0.017	-0.022	184	0.265	0.162	0.08	0.036	0.126	0.271	0.185	0.321
169.5	-58.823	-61.494	-60.328	-62.856	-59.937	-60.149	-59.594	-59.286	184.5	-0.04	-0.011	-0.011	-0.041	-0.04	-0.008	-0.015	-0.02	184.5	0.259	0.157	0.077	0.035	0.122	0.265	0.181	0.317
170	-59.109	-61.246	-60.57	-62.997	-59.126	-59.668	-59.675	-59.452	185	-0.039	-0.01	-0.01	-0.038	-0.037	-0.007	-0.014	-0.018	185	0.254	0.152	0.075	0.034	0.119	0.259	0.176	0.312
170.5	-59.159	-61.391	-60.559	-63.108	-57.338	-60.175	-59.953	-59.684	185.5	-0.037	-0.009	-0.009	-0.035	-0.034	-0.006	-0.013	-0.016	185.5	0.248	0.148	0.072	0.033	0.115	0.253	0.172	0.307
171	-59.395	-61.286	-60.664	-62.698	-55.648	-60.464	-60.154	-60.067	186	-0.035	-0.009	-0.009	-0.032	-0.032	-0.006	-0.012	-0.017	186	0.243	0.144	0.07	0.032	0.112	0.247	0.168	0.302
171.5	-59.266	-61.673	-61.192	-62.094	-53.595	-60.414	-59.993	-59.443	186.5	-0.034	-0.008	-0.008	-0.03	-0.029	-0.005	-0.011	-0.018	186.5	0.237	0.139	0.068	0.031	0.109	0.241	0.164	0.297
172	-58.721	-61.659	-61.423	-61.849	-51.878	-60.287	-60.156	-59.296	187	-0.032	-0.009	-0.007	-0.027	-0.027	-0.005	-0.01	-0.02	187	0.232	0.135	0.065	0.03	0.105	0.235	0.16	0.292
172.5	-58.849	-61.908	-61.164	-61.335	-51.968	-60.54	-59.939	-59.858	187.5	-0.03	-0.011	-0.007	-0.025	-0.025	-0.004	-0.009	-0.021	187.5	0.226	0.131	0.063	0.029	0.102	0.229	0.156	0.286
173	-59.304	-61.812	-60.927	-60.738	-52.817	-60.786	-60.14	-60.54	188	-0.028	-0.014	-0.006	-0.023	-0.023	-0.004	-0.008	-0.022	188	0.221	0.127	0.061	0.028	0.099	0.223	0.152	0.281
173.5	-59.367	-62.002	-61.114	-60.72	-53.293	-60.747	-60.299	-60.197	188.5	-0.026	-0.016	-0.006	-0.021	-0.021	-0.003	-0.007	-0.023	188.5	0.225	0.123	0.059	0.027	0.096	0.217	0.148	0.276
174	-58.769	-62.183	-61.43	-61.102	-53.72	-61.146	-60.155	-60.26	189	-0.025	-0.018	-0.005	-0.019	-0.019	-0.003	-0.007	-0.023	189	0.229	0.119	0.057	0.026	0.093	0.211	0.144	0.27
174.5	-59.18	-61.92	-61.582	-60.992	-52.531	-61.052	-60.295	-59.929	189.5	-0.023	-0.019	-0.005	-0.017	-0.018	-0.003	-0.006	-0.023	189.5	0.229	0.115	0.055	0.025	0.09	0.206	0.14	0.265
175	-59.184	-61.699	-61.551	-60.47	-50.069	-60.903	-60.381	-60.274	190	-0.022	-0.02	-0.004	-0.016	-0.016	-0.002	-0.006	-0.023	190	0.227	0.112	0.053	0.024	0.087	0.2	0.136	0.259
175.5	-59.176	-61.663	-61.945	-60.243	-46.4	-61.241	-60.37	-59.665	190.5	-0.02	-0.02	-0.004	-0.014	-0.015	-0.002	-0.005	-0.022	190.5	0.224	0.108	0.051	0.023	0.085	0.195	0.133	0.254
176	-59.039	-61.676	-61.993	-60.598	-39.642	-61.78	-60.527	-59.528	191	-0.019	-0.02	-0.004	-0.013	-0.014	-0.002	-0.005	-0.031	191	0.221	0.105	0.049	0.022	0.082	0.19	0.129	0.249
176.5	-58.867	-61.532	-62.174	-60.14	-20.031	-61.566	-60.695	-59.416	191.5	-0.017	-0.02	-0.003	-0.012	-0.013	-0.002	-0.004	-0.037	191.5	0.217	0.101	0.047	0.022	0.079	0.184	0.125	0.243
177	-59.557	-61.647	-61.937	-60.05	37.685	-61.931	-60.685	-59.436	192	-0.016	-0.02	-0.003	-0.011	-0.012	-0.002	-0.004	-0.04	192	0.212	0.098	0.046	0.021	0.077	0.179	0.122	0.238
177.5	-60.182	-61.482	-62.099	-60.318	11.102	-61.939	-61.1	-59.551	192.5	-0.015	-0.019	-0.003	-0.01	-0.011	-0.001	-0.004	-0.041	192.5	0.208	0.095	0.044	0.02	0.074	0.174	0.119	0.233
178	-60.221	-61.203	-61.982	-60.465	-35.664	-61.69	-61.038	-59.629	193	-0.014	-0.019	-0.003	-0.009	-0.01	-0.001	-0.003	-0.04	193	0.204	0.092	0.043	0.019	0.072	0.169	0.115	0.228
178.5	-59.487	-61.593	-62.681	-60.064	-52.884	-62.073	-61.493	-59.401	193.5	-0.012	-0.018	-0.002	-0.008	-0.009	-0.001	-0.003	-0.039	193.5	0.199	0.089	0.041	0.019	0.069	0.164	0.112	0.222
179	-59.681	-61.786	-63.004	-59.866	-56.341	-62.123	-61.363	-59.164	194	-0.011	-0.017	-0.002	-0.007	-0.008	-0.001	-0.003	-0.037	194	0.195	0.086	0.04	0.018	0.067	0.159	0.109	0.217
179.5	-60.032	-61.709	-62.892	-58.431	-55.784	-62.024	-60.751	-59.446	194.5	-0.011	-0.016	-0.002	-0.007	-0.007	-0.001	-0.002	-0.035	194.5	0.191	0.083	0.038	0.017	0.065	0.155	0.106	0.212
180	-59.815	-61.853	-62.718	-57.052	-56.617	-62.092	-60.96	-59.54	195	-0.01	-0.015	-0.002	-0.006	-0.007	-0.001	-0.002	-0.033	195	0.187	0.08	0.037	0.017	0.063	0.15	0.103	0.207
180.5	-59.832	-61.675	-62.767	-55.891	-57.419	-62.082	-60.565	-60.149	195.5	-0.009	-0.014	-0.002	-0.006	-0.006	-0.001	-0.002	-0.031	195.5	0.182	0.077	0.035	0.016	0.061	0.146	0.1	0.202
181	-60.26	-62.012	-62.951	-54.635	-58.58	-61.954	-60.766	-59.934	196	-0.008	-0.014	-0.002	-0.005	-0.006	-0.001	-0.002	-0.029	196	0.178	0.075	0.034	0.016	0.058	0.141	0.097	0.198
181.5	-60.067	-62.078	-63.319	-54.764	-59.292	-62.012	-60.762	-59.716	196.5	-0.007	-0.013	-0.001	-0.005	-0.005	-0.001	-0.002	-0.027	196.5	0.174	0.072	0.033	0.015	0.056	0.137	0.094	0.193
182	-60.048	-61.813	-63.425	-55.292	-59.429	-62.423	-61.036	-59.917	197	-0.007	-0.012	-0.001	-0.004	-0.005	-0.001	-0.002	-0.032	197	0.17	0.07	0.032	0.015	0.055	0.133	0.091	0.188
182.5	-60.338	-61.848	-63.47	-56.503	-59.86	-62.612	-60.964	-60.016	197.5	-0.006	-0.011	-0.001	-0.004	-0.004	-0.001	-0.001	-0.036	197.5	0.166	0.067	0.03	0.014	0.053	0.128	0.088	0.183
183	-61.26	-62.191	-63.316	-57.498	-60.146	-62.499	-61.005	-60.193	198	-0.006	-0.01	-0.001	-0.003	-0.004	0	-0.001	-0.038	198	0.162	0.065	0.029	0.013	0.051	0.124	0.085	0.179
183.5	-61.045	-62.227	-63.301	-58.81	-60.394	-62.2	-61.225	-60.241	198.5	-0.005	-0.009	-0.001	-0.003	-0.004	0	-0.001	-0.038	198.5	0.158	0.063	0.028	0.013	0.049	0.135	0.083	0.174
184	-60.944	-62.382	-63.064	-59.61	-60.866	-62.481	-61.088	-60.599	199	-0.005	-0.009	-0.001	-0.003	-0.003	0	-0.001	-0.037	199	0.154	0.06	0.027	0.013	0.047	0.146	0.08	0.17
184.5	-60.795	-62.265	-63.063	-60.202	-61.25	-62.206	-61.104	-60.809	199.5	-0.004	-0.008	-0.001	-0.003	-0.003	0	-0.001	-0.035	199.5	0.15	0.058	0.026	0.012	0.046	0.151	0.078	0.165
185	-61.066	-62.379	-63.49	-60.252	-61.443	-62.104	-61.074	-60.689	200	-0.004	-0.007	-0.001	-0.002	-0.003	0	-0.001	-0.033	200	0.146	0.056	0.025	0.012	0.044	0.153	0.075	0.161
185.5	-61.048	-62.321	-63.477	-60.539	-61.566	-62.009	-61.144	-60.685
186	-61.232	-62.385	-63.396	-60.789	-61.821	-62.038	-61.287	-61.1
186.5	-61.157	-62.518	-63.331	-61.355	-61.805	-61.874	-61.312	-61.077
187	-61.732	-62.559	-63.473	-61.571	-62.462	-62.191	-61.841	-60.682
187.5	-61.858	-62.202	-63.386	-61.448	-62.556	-62.155	-61.746	-60.714
188	-61.87	-62.357	-63.558	-61.61	-62.815	-62.471	-61.976	-60.954
188.5	-62.031	-61.847	-63.408	-62.29	-62.605	-62.539	-61.965	-60.898
189	-62.035	-61.847	-63.644	-62.456	-62.612	-62.482	-62.038	-60.863
189.5	-61.557	-61.973	-63.282	-62.259	-62.884	-62.647	-61.7	-61.102
190	-61.503	-62.007	-63.438	-62.24	-63.19	-62.61	-61.977	-61.116
190.5	-61.714	-61.715	-63.662	-62.6	-63.281	-62.282	-61.946	-60.994
191	-61.556	-61.736	-63.469	-62.776	-63.66	-62.328	-62.69	-60.66
191.5	-61.721	-61.584	-63.378	-62.884	-63.935	-62.7	-62.294	-60.934
192	-61.676	-61.584	-63.607	-63.205	-63.422	-62.155	-61.936	-60.658
192.5	-61.529	-61.362	-63.503	-62.891	-63.626	-62.12	-62.024	-60.52
193	-61.532	-61.397	-63.351	-63.053	-63.687	-62.433	-62.356	-60.585
193.5	-61.693	-60.933	-63.441	-63.425	-64.11	-62.332	-62.355	-60.437
194	-61.378	-61.113	-63.315	-63.262	-63.795	-62.186	-61.966	-60.853
194.5	-61.255	-60.974	-63.074	-63.516	-63.785	-62.643	-62.182	-60.629
195	-61.769	-61.121	-63.498	-63.372	-63.885	-62.374	-62.155	-60.43
195.5	-61.763	-61.325	-63.683	-63.427	-64.065	-61.986	-62.097	-61.037
196	-61.736	-61.275	-63.567	-63.397	-63.588	-62.588	-62.593	-60.992
196.5	-61.768	-61.406	-63.494	-63.312	-63.597	-62.16	-62.408	-60.757
197	-61.973	-61.741	-63.456	-63.328	-63.555	-62.128	-62.671	-60.71
197.5	-61.796	-61.893	-63.354	-63.544	-63.59	-62.093	-62.517	-60.672
198	-61.921	-61.513	-63.111	-63.608	-63.886	-62.024	-62.658	-60.228
198.5	-62.1	-62.107	-62.953	-63.455	-64.061	-62.27	-62.392	-60.305
199	-62.009	-61.549	-63.297	-63.513	-64.31	-62.032	-62.283	-60.188
199.5	-62.023	-61.826	-63.524	-63.617	-63.848	-62.116	-62.236	-60.174
200	-61.645	-61.955	-63.589	-63.509	-64.156	-62.409	-62.4	-60.025

## Sheet: Figure 7D
Source Data For PD vs DSI plots
> -55 mV		> -50 mV		> -48 mV			> -55 mV		> -55 mV		> -50 mV		> -50 mV		> -48 mV		> -48 mV
PD	DSI	PD	DSI	PD	DSI		Average DSI	Std. Dev. DSI	Average Angle	Angular Std. Dev.	Average DSI	Std. Dev. DSI	Average Angle	Angular Std. Dev.	Average DSI	Std. Dev. DSI	Average Angle	Angular Std. Dev.
99.5903	0.717129						0.416032	0.148245	145.442	25.4231	0.702547	0.227603	144.817	40.4397	0.800406	0.217386	146.52	44.9752
109.221	0.74885
77.9906	0.713914
123.525	0.483818	135	1	135	1
149.825	0.401251	149.016	0.775063	180	1
155.076	0.412195	156.799	0.892205	157.634	0.923882
121.082	0.452242	152.424	0.741115	180	1
143.246	0.520496	142.573	0.956144	135	1
144.81	0.396893	135	1
153.64	0.407317	157.224	0.92389
139.287	0.302287	45	1
144.429	0.422569	75.0559	0.493245	48.7413	0.940627
147.919	0.421464	108.877	0.715415	114.184	0.775137
154.56	0.49021	110.653	0.62229	90.8666	0.69198
157.94	0.460947	134.796	0.660124	137.263	0.66676
157.589	0.487065	137.227	0.710849	141.702	0.735948
152.199	0.503531	134.303	0.761251	139.475	0.826862
160.237	0.544512	154.384	0.746738	160.24	0.843101
156.668	0.525354	151.248	0.759181	164.296	0.857893
126.118	0.413046	180	1
127.283	0.534698	90	1
129.049	0.450224	215.537	0.722909
113.865	0.45543	90	1	90	1
111.42	0.655302	99.2389	0.94919	92.1821	0.985177
171.317	0.00849371	56.4738	0.276423	90	1
123.21	0.194236	95.3437	0.819343	90	1
128.009	0.112755	104.046	0.824033	91.8535	0.969161
167.063	0.129786
214.498	0.186943
159.721	0.255947	270	1
168.653	0.211124	268.42	0.69392	270	1
168.754	0.192627	324.297	0.374017	360	1
154.299	0.258417	159.692	0.405276	168.687	0.812702
164.979	0.20748	312.229	0.199652	360	1
167.166	0.227905	175.935	0.326248	172.425	0.143297
169.22	0.19592	171.256	0.256546	125.324	0.250342
172.639	0.185104	183.644	0.193582	306.817	0.0912605
173.427	0.477373
163.575	0.517341	135	1
140.939	0.253674	167.247	0.697776	177.657	0.910877
157.064	0.462704	165.032	0.735283	167.978	0.808776
203.892	0.358056	194.932	0.830561	180.086	0.999383
132.452	0.331969	170.069	0.740459	177.638	0.958051
157.169	0.4367	180	1	180	1
165.997	0.341511	181.676	0.621719	180.521	0.784215
146.538	0.53282	178.126	0.987156	180	1
98.6462	0.189237	108.912	0.142351	84.2244	0.20422
81.9531	0.18903	38.7702	0.149	24.1895	0.30543
137.596	0.494079	90	1
136.492	0.485555	90	1
150.203	0.479166	120.169	0.913502
145.969	0.513588	124.426	0.861914
157.13	0.501675	172.914	0.947381	180	1
132.15	0.539346	151.323	0.825213	160.503	0.92515
130.214	0.475347	147.25	0.902428	135.013	0.999909
135.116	0.454253	146.537	0.777775	143.935	0.943303
135.206	0.400322	204.319	0.610136	218.64	0.654357
132.662	0.434612	185.139	0.572467	205.867	0.744887
146.081	0.361848	155.342	0.493428	150.243	0.485043
145.144	0.375358	151.818	0.485712	148.462	0.533924
146.799	0.343485	158.578	0.38313	159.683	0.382229
138.439	0.509421	152.73	0.924711	144.235	0.949203
144.768	0.530013	130.227	0.925093	135	1
144.725	0.572293	114.987	0.905407	135	1
147.572	0.531087	102.555	0.91492	90	1
140.365	0.454008	98.0674	0.923413	90	1
149.167	0.539018	140.41	0.729686	175.431	0.928948
167.218	0.494671	174.03	0.905993	180	1
171.068	0.471317	175.832	0.917414	180	1
175.063	0.4535	182.851	0.731882	183.602	0.789622
109.641	0.423374	124.114	0.585334	148.057	0.741649
121.579	0.403525	45	1	45	1
136.055	0.431276	151.735	0.564053	165.273	0.646428
133.398	0.4286	143.626	0.537302	157.204	0.5923
132.704	0.420502	145.248	0.589066	157.245	0.6869
134.878	0.405158	141.152	0.49903	136.251	0.505246
154.771	0.458421	154.558	0.756248	141.32	0.936709
142.015	0.403308	135.059	0.604028	131.825	0.738088
143.085	0.407735	137.705	0.587485	134.894	0.70471
153.969	0.444306	154.918	0.718068	146.207	0.871699
153.603	0.472439	144.475	0.850262	135	1
154.723	0.311976	130.563	0.634536	128.747	0.870885
190.466	0.50555	185.982	0.678057	179.574	0.727103
154.934	0.779484
83.4913	0.439816	60.8014	0.735614	64.0205	0.925586
91.5956	0.449254	92.7876	0.491896	91.3036	0.751292
86.4944	0.565207	73.8724	0.929623	88.4516	0.989289
102.29	0.645632	61.3142	0.92929
118.606	0.624316	122.814	0.852212
117.577	0.628706	132.107	0.974552	135	1
129.132	0.52494	103.352	0.611431	93.9809	0.650717
157.062	0.400524	180.898	0.861008	191.372	0.941583
158.935	0.384475	172.274	0.750665	177.453	0.927859
155.826	0.341948	170.155	0.556492	173.705	0.681964
153.758	0.361394	166.667	0.645304	169.783	0.761765
151.305	0.51225	167.234	0.797558	171.85	0.858969
147.29	0.52344	157.511	0.679626	156.171	0.643597
152.566	0.466051	174.385	0.634335	189.252	0.864398
152.799	0.446948	169.938	0.524412	186.252	0.62578
156.177	0.453983	180.22	0.567388	196.881	0.732542
139.396	0.529189	135.455	0.679761	138.543	0.748259
139.964	0.533505	137.075	0.697457	138.522	0.745336
139.48	0.527143	134.804	0.666811	133.229	0.717762
150.843	0.430656	161.311	0.788826	180	1
156.734	0.322063	132.887	0.918826	135	1
162.56	0.249792	141.257	0.920528	135	1
150.627	0.208996	156.587	0.717055	159.651	0.921784
146.427	0.258792	143.803	0.559588	152.372	0.523809
148.424	0.246732	143.109	0.770254	144.681	0.887707
156.244	0.279554	139.734	0.960322	135	1
130.354	0.203123	179.168	0.126521	176.277	0.285579
157.825	0.149181	199.97	0.362293	194.531	0.547994
156.329	0.147921	191.916	0.327913	186.617	0.475288
136.908	0.181957	211.096	0.0908142	282.707	0.233979
138.758	0.161214	213.421	0.111627	262.5	0.25415
140.317	0.170906	193.768	0.158047	226.2	0.269155
136.329	0.170505	188.258	0.100646	258.001	0.189178
144.542	0.743438
144.344	0.656862	135	1
123.158	0.380888	92.1708	0.67116	90	1
139.143	0.294156	134.516	0.424542	135	0.968633
135.884	0.360741	128.217	0.50847	116.235	0.659095
140.74	0.325074	146.203	0.417307	139.152	0.526682
147.766	0.509906	145.077	0.910519	137.971	0.980271
140.435	0.599807	135.806	0.98589	135	1
104.385	0.447434	97.0681	0.620648	72.797	0.756975
134.221	0.373909	149.117	0.548532	149.279	0.722032
137.738	0.623097	124.817	0.943516	133.039	0.986593
134.55	0.585739	121.474	0.900548	124.934	0.946071
133.327	0.603031	123.753	0.852366	120.756	0.860294
130.167	0.572425	119.736	0.860591	116.115	0.878988
138.367	0.53288	124.614	0.845437	121.625	0.873142
136.076	0.556457	123.243	0.849025	123.619	0.869754
138.987	0.591904	128.631	0.860071	126.951	0.89098
138.376	0.504754	124.595	0.668739	124.128	0.743134
145.3	0.417767	139.013	0.559605	135.796	0.631599
143.749	0.437439	136.24	0.575653	132.46	0.648962
131.314	0.578857	120.672	0.864694	117.242	0.881452
138.749	0.497803	123.362	0.812072	113.197	0.867499
141.116	0.607265	130.115	0.969328	134.728	0.998048
250.019	0.281065	225.272	0.702427	225	1
230.948	0.299425
239.51	0.142861	136.852	0.676138	135	1
230.598	0.141749	137.223	0.661004	135	1
147.653	0.495639	148.977	0.732116	156.314	0.842997
145.783	0.433198	145.951	0.824395	158.306	0.922135
142.744	0.433043	151.353	0.86651	158.962	0.92418
139.854	0.379645	143.515	0.857161	146.766	0.940333
141.756	0.337234	143.967	0.628339	145.234	0.84039
138.94	0.273266	123.102	0.477596	134.413	0.69702
133.607	0.286936	113.271	0.56571	111.416	0.699419
127.4	0.258182	110.27	0.514178	97.2294	0.581206
123.111	0.287956	110.33	0.602956	90.87	0.736576
161.577	0.43263	163.386	0.768066	168.284	0.856809
158.104	0.282847	152.44	0.58323	158.34	0.66014
174.385	0.204867	167.777	0.400594	178.353	0.526886
155.656	0.304433	166.186	0.610391	170.631	0.7209
152.532	0.379348	157.925	0.748079	159.46	0.793879
144.464	0.354176	180.552	0.941855	180	1
190.635	0.399524	205.287	0.896824	202.679	0.923884
190.166	0.369003	205.258	0.886563	201.509	0.924018
171.682	0.296121	263.817	0.23038	270.84	0.965919
175.549	0.321416	261.641	0.535244	270	1
164.341	0.465193	180	1
143.063	0.609671	153.408	0.925918	151.797	0.928475
133.856	0.505776	137.586	0.822617	140.357	0.88842
128.048	0.456892	117.522	0.660744	111.562	0.719732
129.89	0.461892	121.322	0.664544	115.322	0.729514
170.454	0.563287	188.947	0.950342	180	1
162.728	0.429719	177.394	0.598901	160.016	0.752411
160.536	0.367476	172.912	0.799511	180	1
147.517	0.313089	140.316	0.784979	150.921	0.902547
129.515	0.272938	96.6117	0.640008	86.2022	0.876648
151.196	0.475313	139.78	0.509954	118.577	0.619582
131.966	0.429102	107.956	0.708799	99.6462	0.839362
140.062	0.46346	126.267	0.443876	146.508	0.359004
360	1
