# Supplementary material for: The functional organization of excitation and inhibition in the dendrites of mouse direction-selective ganglion cells
Source: eLife. 2020 Feb 25;9:e52949. doi: 10.7554/eLife.52949 (PMC7069718; doi:10.7554/eLife.52949)
Supplement: Figure 8—source data 1. [file elife-52949-fig8-data1.xlsx]

## Sheet: Figure 8B
Spiking
	Control		SAC Ablation
Time	PD	ND	PD	ND
0	-3.0518	4.8828	-4.8828	-7.9346
0.000100033	-4.8828	-1.8311	-3.6621	-4.2725
0.000200067	4.2725	0.61035	3.6621	0
0.0003001	4.2725	-1.2207	3.6621	4.8828
0.000400133	4.8828	5.4932	-0.61035	-0.61035
0.000500167	-4.8828	1.8311	3.6621	-0.61035
0.0006002	1.8311	-4.2725	3.0518	-1.2207
0.000700233	0	-2.4414	0	2.4414
0.000800267	-6.7139	8.5449	1.2207	-1.8311
0.0009003	1.2207	-0.61035	0	-2.4414
0.00100033	3.6621	-2.4414	1.8311	-3.0518
0.00110037	1.2207	-1.8311	1.8311	-9.1553
0.0012004	-3.6621	-1.2207	6.1035	-4.2725
0.00130043	4.8828	3.0518	3.0518	-0.61035
0.00140047	3.6621	-2.4414	4.2725	4.2725
0.0015005	0.61035	-2.4414	3.6621	-1.2207
0.00160053	1.2207	0	2.4414	-2.4414
0.00170057	0	-1.2207	0	12.207
0.0018006	0	5.4932	-6.7139	-1.2207
0.00190063	4.8828	2.4414	0	1.8311
0.00200067	0.61035	0.61035	-1.8311	4.2725
0.0021007	-1.8311	-3.0518	-1.2207	4.2725
0.00220073	2.4414	3.0518	0	2.4414
0.00230077	-2.4414	6.1035	8.5449	-1.2207
0.0024008	-1.8311	-2.4414	-1.2207	-6.7139
0.00250083	-3.0518	-0.61035	-3.0518	6.1035
0.00260087	-4.2725	-3.6621	-2.4414	3.0518
0.0027009	3.6621	2.4414	3.0518	4.2725
0.00280093	2.4414	1.8311	-1.2207	-4.2725
0.00290097	4.8828	6.1035	5.4932	-6.7139
0.003001	-1.8311	2.4414	1.2207	0.61035
0.00310103	0.61035	-0.61035	-4.8828	9.7656
0.00320107	3.6621	4.2725	3.0518	7.3242
0.0033011	-1.2207	-3.0518	-9.1553	7.3242
0.00340113	0	3.0518	-4.8828	6.1035
0.00350117	4.8828	1.8311	-2.4414	12.817
0.0036012	-2.4414	4.2725	-4.8828	7.9346
0.00370123	-3.0518	8.5449	-3.0518	9.7656
0.00380127	-0.61035	-1.8311	-2.4414	3.0518
0.0039013	1.8311	-3.6621	-4.2725	5.4932
0.00400133	0	1.8311	-3.0518	9.1553
0.00410137	-0.61035	-3.0518	-2.4414	2.4414
0.0042014	-5.4932	-1.2207	0	12.817
0.00430143	-2.4414	0.61035	0	7.3242
0.00440147	0.61035	-4.8828	2.4414	3.6621
0.0045015	-4.8828	1.2207	2.4414	5.4932
0.00460153	7.3242	0.61035	-4.2725	8.5449
0.00470157	-1.2207	1.8311	1.8311	-0.61035
0.0048016	-10.986	-1.2207	-2.4414	3.0518
0.00490163	-0.61035	2.4414	-1.2207	2.4414
0.00500167	-1.8311	1.8311	-4.2725	7.9346
0.0051017	0	-4.2725	-4.8828	2.4414
0.00520173	-1.8311	3.6621	0.61035	3.6621
0.00530177	-4.2725	0.61035	-0.61035	2.4414
0.0054018	-12.207	4.2725	-10.376	-1.8311
0.00550183	-1.8311	4.2725	-9.7656	-3.0518
0.00560187	-1.2207	0.61035	-8.5449	1.2207
0.0057019	2.4414	9.1553	-6.7139	3.0518
0.00580193	0.61035	-4.2725	-3.0518	5.4932
0.00590197	-6.1035	-0.61035	-4.2725	1.8311
0.006002	-1.2207	-8.5449	-3.0518	-2.4414
0.00610203	-6.1035	-1.2207	-4.2725	-2.4414
0.00620207	5.4932	0.61035	4.2725	-3.0518
0.0063021	-3.6621	-9.7656	8.5449	4.8828
0.00640213	0.61035	-5.4932	-1.8311	-7.3242
0.00650217	8.5449	1.8311	3.0518	-3.6621
0.0066022	-3.0518	-0.61035	-0.61035	0.61035
0.00670223	-0.61035	5.4932	-6.1035	-4.2725
0.00680227	1.8311	6.1035	-2.4414	-5.4932
0.0069023	3.6621	-0.61035	-3.6621	-0.61035
0.00700233	3.0518	-7.9346	3.0518	-4.8828
0.00710237	0	-3.0518	1.8311	-2.4414
0.0072024	1.2207	1.2207	-0.61035	-5.4932
0.00730243	0.61035	-6.7139	-2.4414	-1.2207
0.00740247	1.8311	-0.61035	-6.1035	1.8311
0.0075025	-1.2207	-3.6621	-4.8828	-1.8311
0.00760253	2.4414	-3.6621	-6.1035	-4.2725
0.00770257	0	-4.2725	-8.5449	-6.1035
0.0078026	1.2207	-3.6621	2.4414	-3.0518
0.00790263	6.1035	0	-0.61035	1.2207
0.00800267	3.0518	1.8311	4.8828	-10.376
0.0081027	-0.61035	3.6621	9.1553	-3.0518
0.00820273	4.2725	1.2207	-1.8311	1.2207
0.00830277	-3.0518	-4.2725	7.3242	0
0.0084028	2.4414	4.8828	0	-1.2207
0.00850283	3.0518	-6.7139	-1.2207	-11.597
0.00860287	0	1.8311	3.0518	-1.2207
0.0087029	-1.2207	6.1035	0	-5.4932
0.00880293	1.2207	-2.4414	-2.4414	-2.4414
0.00890297	2.4414	-6.1035	8.5449	1.2207
0.009003	3.0518	7.9346	-6.7139	-6.1035
0.00910303	-3.0518	1.8311	0	-0.61035
0.00920307	-6.1035	6.7139	-4.2725	-7.3242
0.0093031	3.6621	3.6621	5.4932	-4.8828
0.00940313	-5.4932	3.0518	6.1035	-0.61035
0.00950317	1.8311	-4.8828	0.61035	-6.1035
0.0096032	2.4414	1.2207	2.4414	0.61035
0.00970323	8.5449	3.6621	5.4932	-3.0518
0.00980327	4.2725	2.4414	3.6621	0.61035
0.0099033	1.8311	4.8828	5.4932	-6.1035
0.0100033	-0.61035	-3.0518	4.8828	-8.5449
0.0101034	0	1.2207	-4.8828	-9.7656
0.0102034	-1.8311	5.4932	3.0518	-4.8828
0.0103034	0	-1.8311	1.8311	-10.376
0.0104035	7.3242	-5.4932	0	-9.7656
0.0105035	-1.8311	3.6621	0	-3.6621
0.0106035	-0.61035	7.9346	-4.2725	-1.8311
0.0107036	7.3242	11.597	-1.2207	-2.4414
0.0108036	-1.2207	-0.61035	-4.8828	-1.2207
0.0109036	6.1035	1.2207	1.2207	-4.2725
0.0110037	-1.8311	-2.4414	1.8311	-3.6621
0.0111037	1.8311	7.9346	-3.0518	-1.2207
0.0112037	1.8311	9.1553	-4.8828	-3.6621
0.0113038	-1.8311	4.2725	2.4414	-1.8311
0.0114038	1.2207	5.4932	1.2207	0.61035
0.0115038	-0.61035	-0.61035	-2.4414	-5.4932
0.0116039	-1.8311	0.61035	-0.61035	-7.3242
0.0117039	2.4414	-0.61035	-13.428	1.8311
0.0118039	3.0518	-0.61035	-4.2725	-7.3242
0.011904	2.4414	-1.8311	-7.3242	-1.8311
0.012004	2.4414	7.3242	-6.7139	-1.2207
0.012104	-1.2207	4.8828	-3.0518	-9.1553
0.0122041	-1.2207	1.8311	-1.2207	-4.8828
0.0123041	3.6621	1.8311	-4.8828	-2.4414
0.0124041	1.8311	2.4414	-10.986	-1.8311
0.0125042	-6.1035	1.8311	-4.2725	1.2207
0.0126042	5.4932	-3.0518	-6.1035	-3.0518
0.0127042	-4.8828	-1.8311	-0.61035	3.0518
0.0128043	-1.2207	3.6621	-1.2207	-0.61035
0.0129043	0	-3.6621	-6.1035	1.8311
0.0130043	1.2207	3.0518	-1.2207	-1.2207
0.0131044	0.61035	-1.8311	1.8311	0
0.0132044	2.4414	-4.2725	-7.3242	-4.8828
0.0133044	0	-2.4414	-4.2725	-4.2725
0.0134045	-3.0518	-1.8311	1.8311	-8.5449
0.0135045	7.3242	-1.8311	-4.8828	-7.3242
0.0136045	-3.0518	-2.4414	3.0518	-8.5449
0.0137046	0.61035	-3.0518	5.4932	-3.6621
0.0138046	-5.4932	0.61035	4.2725	-3.0518
0.0139046	-3.0518	3.6621	0	-1.8311
0.0140047	6.7139	7.3242	0.61035	-3.0518
0.0141047	7.3242	1.2207	-1.2207	-0.61035
0.0142047	4.8828	3.6621	-3.0518	0.61035
0.0143048	0	-3.6621	0.61035	3.6621
0.0144048	1.8311	0	0	3.6621
0.0145048	1.8311	1.2207	-6.7139	3.6621
0.0146049	-3.0518	0.61035	4.8828	-7.9346
0.0147049	-0.61035	5.4932	-4.8828	-4.2725
0.0148049	9.1553	1.8311	4.2725	-9.7656
0.014905	2.4414	-3.6621	3.6621	-2.4414
0.015005	-0.61035	-1.8311	-1.8311	3.0518
0.015105	0	9.7656	-0.61035	-3.0518
0.0152051	0	0.61035	-3.0518	-1.2207
0.0153051	6.1035	0	-1.2207	-2.4414
0.0154051	-5.4932	0	-1.8311	1.8311
0.0155052	1.2207	-1.2207	-1.8311	0
0.0156052	-1.2207	1.2207	-6.7139	-1.8311
0.0157052	4.8828	-5.4932	-14.038	0
0.0158053	-3.0518	0.61035	-9.1553	-1.2207
0.0159053	-1.2207	6.7139	-9.7656	-5.4932
0.0160053	0	1.2207	-11.597	-10.376
0.0161054	-0.61035	7.3242	-8.5449	6.1035
0.0162054	0.61035	-1.2207	-0.61035	-7.9346
0.0163054	5.4932	-1.2207	1.2207	1.8311
0.0164055	-7.9346	-8.5449	4.2725	3.6621
0.0165055	-0.61035	-1.8311	-2.4414	1.8311
0.0166055	-3.6621	1.2207	-2.4414	-7.9346
0.0167056	2.4414	1.8311	-1.2207	-1.2207
0.0168056	1.8311	6.7139	6.1035	-2.4414
0.0169056	2.4414	-1.8311	1.2207	-2.4414
0.0170057	-1.2207	4.2725	-1.8311	-2.4414
0.0171057	0	4.2725	0	-1.2207
0.0172057	3.0518	3.6621	-4.8828	-4.8828
0.0173058	0	-0.61035	-7.3242	-7.3242
0.0174058	-4.2725	6.1035	-7.3242	-7.9346
0.0175058	5.4932	0	-4.2725	-2.4414
0.0176059	4.2725	1.2207	-3.0518	-10.376
0.0177059	3.6621	2.4414	-6.1035	-4.8828
0.0178059	6.1035	0.61035	-5.4932	-6.7139
0.017906	-3.6621	4.2725	3.0518	-8.5449
0.018006	0.61035	-4.8828	0	-7.3242
0.018106	-5.4932	2.4414	-1.8311	-4.8828
0.0182061	0	1.2207	4.2725	-8.5449
0.0183061	-3.0518	-1.8311	2.4414	-14.038
0.0184061	0.61035	-1.2207	1.2207	-9.1553
0.0185062	-3.6621	-1.8311	1.8311	-5.4932
0.0186062	15.259	3.0518	3.0518	-5.4932
0.0187062	1.8311	2.4414	1.8311	2.4414
0.0188063	3.0518	0.61035	1.8311	-1.2207
0.0189063	-1.8311	-3.0518	2.4414	-0.61035
0.0190063	-0.61035	-9.1553	-1.2207	-6.1035
0.0191064	4.8828	9.7656	-1.2207	-9.7656
0.0192064	1.8311	0	5.4932	-4.8828
0.0193064	-1.2207	-3.6621	3.0518	-6.1035
0.0194065	1.8311	0	0	-4.2725
0.0195065	-6.7139	2.4414	-1.2207	-12.207
0.0196065	0.61035	4.8828	-2.4414	0.61035
0.0197066	-4.2725	-0.61035	-10.376	-1.2207
0.0198066	2.4414	-1.2207	-4.2725	-1.2207
0.0199066	-0.61035	1.8311	-10.986	-4.8828
0.0200067	3.6621	3.0518	-12.817	-0.61035
0.0201067	-7.9346	-2.4414	0.61035	-2.4414
0.0202067	1.2207	3.0518	-0.61035	-6.1035
0.0203068	-4.8828	-2.4414	0	-1.2207
0.0204068	-2.4414	-4.8828	0.61035	0
0.0205068	2.4414	-1.8311	1.2207	-4.2725
0.0206069	1.2207	-2.4414	3.0518	-5.4932
0.0207069	6.7139	-5.4932	-4.8828	-4.2725
0.0208069	2.4414	2.4414	2.4414	-9.1553
0.020907	-6.1035	-3.0518	-4.2725	-6.7139
0.021007	1.8311	5.4932	0	-1.8311
0.021107	-3.0518	-2.4414	-0.61035	-3.6621
0.0212071	1.2207	7.9346	0	-3.6621
0.0213071	-2.4414	3.0518	-8.5449	-1.2207
0.0214071	-0.61035	2.4414	-4.8828	-1.8311
0.0215072	-1.8311	4.8828	-3.0518	0.61035
0.0216072	3.6621	-1.8311	-2.4414	-4.2725
0.0217072	1.2207	-0.61035	-4.2725	-6.7139
0.0218073	-3.0518	-1.8311	-0.61035	-9.1553
0.0219073	4.8828	3.0518	0.61035	-0.61035
0.0220073	-6.1035	-6.7139	10.376	0.61035
0.0221074	1.2207	-5.4932	4.8828	-3.0518
0.0222074	0.61035	0	2.4414	-4.8828
0.0223074	-4.2725	-2.4414	0.61035	0
0.0224075	4.8828	7.3242	7.3242	-1.8311
0.0225075	6.7139	-5.4932	4.8828	-2.4414
0.0226075	6.1035	1.8311	12.207	0
0.0227076	4.8828	-2.4414	-0.61035	-7.9346
0.0228076	3.0518	5.4932	-2.4414	-5.4932
0.0229076	4.8828	3.6621	4.2725	-0.61035
0.0230077	-7.3242	-1.8311	10.376	3.6621
0.0231077	1.2207	1.2207	-0.61035	-2.4414
0.0232077	8.5449	-8.5449	2.4414	-4.2725
0.0233078	1.2207	6.1035	-4.8828	-3.6621
0.0234078	-3.0518	-4.8828	3.0518	-3.0518
0.0235078	1.2207	5.4932	4.2725	4.8828
0.0236079	-7.3242	2.4414	6.1035	-3.6621
0.0237079	0.61035	-0.61035	-4.2725	0.61035
0.0238079	-7.9346	-2.4414	4.2725	-6.7139
0.023908	1.8311	-0.61035	-3.6621	-7.3242
0.024008	-3.6621	-3.0518	2.4414	-1.2207
0.024108	-3.0518	0	3.6621	-4.2725
0.0242081	-5.4932	-1.2207	10.376	1.2207
0.0243081	0.61035	5.4932	-4.8828	-1.8311
0.0244081	-4.2725	-3.6621	-3.6621	3.6621
0.0245082	-3.6621	-0.61035	2.4414	3.0518
0.0246082	-1.2207	-4.2725	0	-1.8311
0.0247082	1.2207	-2.4414	8.5449	-3.0518
0.0248083	2.4414	3.0518	1.2207	-4.8828
0.0249083	-4.2725	-4.8828	6.7139	-3.6621
0.0250083	3.0518	4.8828	0.61035	1.8311
0.0251084	0.61035	0	1.8311	-2.4414
0.0252084	1.8311	0.61035	-2.4414	-1.2207
0.0253084	8.5449	1.8311	3.6621	-4.8828
0.0254085	0	8.5449	4.2725	-6.1035
0.0255085	0	-0.61035	-3.0518	-7.3242
0.0256085	4.8828	3.0518	-4.8828	-2.4414
0.0257086	2.4414	5.4932	4.8828	-1.2207
0.0258086	1.8311	-3.0518	0	-3.0518
0.0259086	3.6621	-0.61035	-3.6621	-6.7139
0.0260087	-3.6621	5.4932	2.4414	-0.61035
0.0261087	7.3242	4.2725	3.0518	-1.2207
0.0262087	4.8828	3.0518	7.9346	-4.2725
0.0263088	2.4414	-2.4414	8.5449	-4.2725
0.0264088	3.6621	4.2725	6.7139	-3.0518
0.0265088	1.8311	-3.6621	11.597	0.61035
0.0266089	3.6621	-1.2207	9.1553	-7.3242
0.0267089	-1.8311	-0.61035	4.8828	-9.1553
0.0268089	0.61035	1.8311	5.4932	-9.1553
0.026909	1.8311	-5.4932	15.869	-4.8828
0.027009	-0.61035	-6.1035	9.7656	-14.038
0.027109	1.2207	2.4414	7.3242	-7.3242
0.0272091	-4.2725	-2.4414	10.986	-3.6621
0.0273091	1.2207	-1.2207	3.0518	-3.0518
0.0274091	-3.0518	3.6621	7.9346	-0.61035
0.0275092	2.4414	5.4932	5.4932	-2.4414
0.0276092	1.8311	0.61035	4.2725	1.2207
0.0277092	-0.61035	6.1035	9.1553	1.2207
0.0278093	0.61035	0	3.6621	1.8311
0.0279093	-3.0518	-6.1035	6.1035	3.6621
0.0280093	-1.8311	3.0518	4.8828	4.8828
0.0281094	0.61035	0	11.597	-4.8828
0.0282094	-0.61035	-5.4932	6.7139	0
0.0283094	7.3242	-0.61035	12.817	-4.8828
0.0284095	1.8311	-0.61035	14.648	3.0518
0.0285095	-0.61035	-4.2725	1.8311	-0.61035
0.0286095	0	1.2207	5.4932	0
0.0287096	2.4414	-3.0518	8.5449	-2.4414
0.0288096	1.2207	2.4414	1.8311	9.7656
0.0289096	-2.4414	5.4932	7.3242	-3.6621
0.0290097	-1.8311	4.2725	10.376	-1.2207
0.0291097	-3.0518	1.8311	6.7139	1.8311
0.0292097	0.61035	1.8311	3.0518	0.61035
0.0293098	1.8311	0.61035	10.376	5.4932
0.0294098	4.2725	1.2207	7.9346	-2.4414
0.0295098	-3.6621	-1.8311	8.5449	-0.61035
0.0296099	-4.8828	3.6621	4.2725	1.2207
0.0297099	3.6621	6.1035	3.6621	-0.61035
0.0298099	-1.2207	-3.0518	5.4932	1.8311
0.02991	-1.2207	-2.4414	-0.61035	-1.8311
0.03001	1.8311	1.8311	-3.0518	-0.61035
0.03011	-6.7139	-3.6621	8.5449	0
0.0302101	-8.5449	9.1553	10.376	-1.8311
0.0303101	-3.0518	10.986	1.2207	-6.1035
0.0304101	-2.4414	1.8311	1.8311	-3.6621
0.0305102	0	-3.0518	6.1035	-0.61035
0.0306102	-4.8828	-2.4414	1.8311	-7.9346
0.0307102	-2.4414	6.7139	7.9346	-6.1035
0.0308103	6.1035	0.61035	1.8311	-13.428
0.0309103	1.2207	2.4414	9.1553	-6.7139
0.0310103	4.8828	-2.4414	6.1035	-8.5449
0.0311104	7.9346	1.8311	1.8311	-2.4414
0.0312104	2.4414	-1.2207	4.2725	0.61035
0.0313104	2.4414	-1.8311	-1.8311	-8.5449
0.0314105	-2.4414	-0.61035	5.4932	-3.6621
0.0315105	2.4414	-2.4414	6.7139	-6.7139
0.0316105	0.61035	0.61035	-1.8311	-3.6621
0.0317106	-0.61035	-6.1035	4.2725	-0.61035
0.0318106	3.0518	0.61035	8.5449	-5.4932
0.0319106	-3.6621	-1.2207	5.4932	4.8828
0.0320107	0	4.8828	15.869	4.2725
0.0321107	-1.2207	2.4414	3.6621	-0.61035
0.0322107	3.0518	3.0518	-3.0518	-6.7139
0.0323108	1.2207	2.4414	9.1553	-10.376
0.0324108	-1.8311	2.4414	1.8311	-10.376
0.0325108	-1.2207	-0.61035	-1.2207	-3.6621
0.0326109	-6.7139	3.0518	0.61035	-7.3242
0.0327109	0	6.7139	1.2207	-9.1553
0.0328109	-3.0518	3.6621	-4.2725	-4.2725
0.032911	6.1035	-4.2725	-2.4414	-5.4932
0.033011	2.4414	1.8311	2.4414	-7.3242
0.033111	-3.0518	-0.61035	-0.61035	0
0.0332111	-2.4414	-3.6621	1.8311	-6.1035
0.0333111	1.8311	0	5.4932	-6.7139
0.0334111	2.4414	-1.2207	4.2725	-10.376
0.0335112	0	8.5449	6.7139	-3.0518
0.0336112	3.6621	-0.61035	9.1553	-7.3242
0.0337112	5.4932	-4.2725	4.2725	-6.1035
0.0338113	7.9346	-0.61035	3.0518	-10.376
0.0339113	0.61035	-0.61035	1.8311	-7.9346
0.0340113	2.4414	0	3.6621	-4.2725
0.0341114	0.61035	0.61035	4.8828	-7.9346
0.0342114	-0.61035	-7.3242	1.2207	-7.9346
0.0343114	3.0518	-4.2725	0	-2.4414
0.0344115	-1.2207	4.2725	4.8828	-7.3242
0.0345115	3.6621	0.61035	1.8311	-9.1553
0.0346115	-4.8828	4.8828	5.4932	-10.376
0.0347116	-5.4932	6.1035	-3.0518	-3.0518
0.0348116	3.6621	0.61035	-4.2725	3.6621
0.0349116	3.0518	-1.8311	-0.61035	-5.4932
0.0350117	-2.4414	2.4414	-6.7139	-4.8828
0.0351117	4.2725	3.0518	-4.8828	-4.2725
0.0352117	-2.4414	0	-7.3242	-3.6621
0.0353118	4.8828	1.8311	-6.7139	-8.5449
0.0354118	-1.2207	-1.2207	-4.8828	0
0.0355118	3.0518	3.6621	-4.2725	-8.5449
0.0356119	-0.61035	1.8311	-2.4414	-4.2725
0.0357119	0	-5.4932	-5.4932	-7.9346
0.0358119	-1.2207	1.2207	3.0518	-8.5449
0.035912	-3.0518	-1.2207	-4.2725	-1.8311
0.036012	-2.4414	5.4932	-7.3242	-6.7139
0.036112	1.8311	1.2207	-0.61035	-3.0518
0.0362121	5.4932	3.0518	3.0518	-7.3242
0.0363121	-1.8311	4.8828	-1.2207	-3.6621
0.0364121	2.4414	3.0518	5.4932	-4.8828
0.0365122	-4.8828	2.4414	-4.2725	-0.61035
0.0366122	1.2207	1.2207	-6.7139	-7.9346
0.0367122	-1.2207	-1.2207	2.4414	-4.8828
0.0368123	0	-1.2207	-4.8828	-11.597
0.0369123	-3.0518	-1.8311	1.2207	-5.4932
0.0370123	-1.2207	4.2725	-3.0518	-6.1035
0.0371124	2.4414	4.8828	-5.4932	-1.8311
0.0372124	1.2207	-2.4414	7.3242	-9.1553
0.0373124	-2.4414	0	-1.8311	-8.5449
0.0374125	-0.61035	-5.4932	0.61035	-12.207
0.0375125	4.8828	-1.2207	1.8311	-2.4414
0.0376125	1.8311	3.6621	0	-0.61035
0.0377126	4.2725	1.8311	1.2207	-7.3242
0.0378126	3.6621	0	-0.61035	-2.4414
0.0379126	3.6621	2.4414	-1.2207	-1.8311
0.0380127	-0.61035	-1.8311	-6.1035	-12.207
0.0381127	-4.8828	1.2207	-7.9346	-8.5449
0.0382127	-4.8828	0	-4.2725	-12.207
0.0383128	0.61035	-0.61035	-3.6621	-0.61035
0.0384128	-1.8311	0.61035	4.2725	-4.2725
0.0385128	-3.0518	7.9346	-4.8828	1.8311
0.0386129	1.2207	3.6621	-0.61035	-1.2207
0.0387129	-3.6621	3.0518	-0.61035	0.61035
0.0388129	-1.2207	-0.61035	-4.2725	2.4414
0.038913	1.2207	-1.2207	2.4414	3.6621
0.039013	-1.2207	-1.2207	2.4414	-1.8311
0.039113	-6.7139	-1.2207	-1.8311	1.2207
0.0392131	0	3.0518	-1.2207	-3.0518
0.0393131	-2.4414	0	0.61035	-0.61035
0.0394131	2.4414	1.8311	-4.2725	-3.6621
0.0395132	3.6621	1.8311	-7.9346	-1.2207
0.0396132	0	2.4414	-4.8828	0
0.0397132	1.2207	-0.61035	-4.2725	-3.0518
0.0398133	1.2207	-0.61035	-3.0518	-5.4932
0.0399133	1.8311	0.61035	-3.6621	-3.6621
0.0400133	-1.2207	-1.8311	-9.1553	-3.6621
0.0401134	-1.2207	-6.1035	-5.4932	-0.61035
0.0402134	-0.61035	-3.0518	-5.4932	0.61035
0.0403134	0.61035	-6.7139	-9.1553	-3.0518
0.0404135	1.2207	3.0518	-3.0518	-0.61035
0.0405135	-5.4932	6.1035	-7.9346	0
0.0406135	3.0518	7.9346	-9.7656	-7.3242
0.0407136	-5.4932	0	3.0518	-4.8828
0.0408136	-4.8828	3.6621	-4.8828	-6.1035
0.0409136	1.2207	-1.8311	-3.0518	1.2207
0.0410137	-0.61035	-6.1035	7.9346	-7.3242
0.0411137	0.61035	3.6621	4.2725	1.8311
0.0412137	-4.8828	-3.0518	-1.8311	-1.2207
0.0413138	-0.61035	0.61035	-2.4414	0
0.0414138	0	1.8311	-4.8828	-6.1035
0.0415138	-0.61035	-4.8828	1.2207	-1.8311
0.0416139	-6.1035	-3.6621	-5.4932	-1.8311
0.0417139	-2.4414	-0.61035	-3.6621	1.8311
0.0418139	-1.2207	-0.61035	-3.0518	0.61035
0.041914	-1.2207	2.4414	-4.8828	-2.4414
0.042014	1.2207	-3.0518	1.8311	-6.7139
0.042114	-4.2725	6.1035	-2.4414	-6.1035
0.0422141	-1.8311	1.8311	-6.1035	-0.61035
0.0423141	-2.4414	0	4.8828	-4.8828
0.0424141	-4.2725	-4.2725	-1.2207	-1.8311
0.0425142	-7.3242	0	0.61035	-0.61035
0.0426142	-7.3242	-1.2207	15.869	-2.4414
0.0427142	-3.6621	-1.8311	-1.2207	9.1553
0.0428143	0	-2.4414	5.4932	-1.8311
0.0429143	1.2207	0	5.4932	2.4414
0.0430143	-2.4414	0	9.7656	0.61035
0.0431144	0.61035	0.61035	9.7656	1.2207
0.0432144	4.8828	-0.61035	1.8311	-3.6621
0.0433144	1.8311	-1.8311	0	5.4932
0.0434145	3.0518	4.8828	-3.0518	8.5449
0.0435145	-1.2207	-1.2207	3.0518	8.5449
0.0436145	0	1.2207	1.8311	-4.2725
0.0437146	1.2207	3.6621	4.2725	1.8311
0.0438146	2.4414	3.0518	2.4414	4.8828
0.0439146	-5.4932	1.2207	7.3242	0.61035
0.0440147	-3.0518	0.61035	-5.4932	-1.8311
0.0441147	1.2207	3.0518	4.8828	4.8828
0.0442147	-3.0518	2.4414	-1.2207	2.4414
0.0443148	3.6621	0.61035	2.4414	0
0.0444148	0	-1.8311	0	-3.6621
0.0445148	1.2207	1.2207	-2.4414	-7.3242
0.0446149	-1.8311	-13.428	-3.6621	-6.7139
0.0447149	4.8828	-2.4414	0.61035	-1.2207
0.0448149	-1.2207	-4.8828	-2.4414	-14.648
0.044915	-7.3242	-1.2207	3.6621	-9.1553
0.045015	0.61035	3.6621	0	-9.7656
0.045115	-0.61035	2.4414	-1.2207	-7.3242
0.0452151	-2.4414	-3.0518	-6.1035	-0.61035
0.0453151	3.6621	0.61035	-0.61035	-6.1035
0.0454151	-2.4414	-3.0518	-6.1035	-3.6621
0.0455152	-1.2207	4.2725	-3.6621	3.6621
0.0456152	3.0518	5.4932	-3.6621	-7.3242
0.0457152	-1.8311	3.6621	-1.8311	-5.4932
0.0458153	-1.2207	1.8311	1.8311	-3.6621
0.0459153	3.0518	-0.61035	-3.0518	-1.2207
0.0460153	0.61035	1.8311	4.8828	0.61035
0.0461154	0.61035	-2.4414	-4.8828	-4.8828
0.0462154	0.61035	-6.1035	-3.0518	-5.4932
0.0463154	0	-0.61035	0	-7.9346
0.0464155	-5.4932	-2.4414	0.61035	-7.3242
0.0465155	4.2725	1.2207	1.2207	-4.8828
0.0466155	-3.0518	3.0518	2.4414	-2.4414
0.0467156	1.8311	-3.0518	1.8311	-4.8828
0.0468156	0	-0.61035	-4.2725	1.2207
0.0469156	3.0518	-1.8311	1.8311	1.2207
0.0470157	-1.8311	4.2725	-0.61035	-1.8311
0.0471157	-4.2725	4.2725	3.6621	1.8311
0.0472157	-3.0518	6.7139	1.8311	3.6621
0.0473158	1.2207	5.4932	0	-1.2207
0.0474158	-7.9346	4.2725	-4.2725	-0.61035
0.0475158	3.0518	-0.61035	-1.2207	-7.3242
0.0476159	-4.8828	6.7139	-5.4932	-7.3242
0.0477159	-3.6621	-0.61035	5.4932	-1.2207
0.0478159	-3.0518	0	2.4414	-1.2207
0.047916	-1.8311	9.7656	0.61035	-4.8828
0.048016	4.2725	2.4414	1.8311	-3.6621
0.048116	-1.8311	-0.61035	4.8828	-9.1553
0.0482161	-4.2725	-1.2207	0.61035	-6.1035
0.0483161	0.61035	2.4414	-2.4414	1.2207
0.0484161	-2.4414	-4.2725	-4.2725	-4.2725
0.0485162	-4.2725	-0.61035	-3.0518	-9.7656
0.0486162	-0.61035	0	0.61035	-1.2207
0.0487162	0	-4.2725	0.61035	1.8311
0.0488163	3.0518	0	0	1.2207
0.0489163	-4.8828	-2.4414	0.61035	-1.2207
0.0490163	1.2207	4.2725	0	1.2207
0.0491164	-3.0518	-4.8828	4.2725	-5.4932
0.0492164	1.8311	3.6621	-4.2725	-1.8311
0.0493164	-0.61035	-2.4414	8.5449	-2.4414
0.0494165	6.7139	-1.8311	9.7656	-1.8311
0.0495165	1.8311	3.6621	10.376	2.4414
0.0496165	-2.4414	-1.2207	6.1035	-2.4414
0.0497166	1.8311	2.4414	4.8828	1.8311
0.0498166	-3.6621	0.61035	4.2725	-1.8311
0.0499166	-2.4414	-3.6621	6.1035	0.61035
0.0500167	-3.0518	-0.61035	10.986	-1.8311
0.0501167	0.61035	3.6621	9.7656	-0.61035
0.0502167	1.2207	-4.8828	4.8828	4.8828
0.0503168	-0.61035	0.61035	4.8828	8.5449
0.0504168	3.0518	3.6621	9.7656	-9.7656
0.0505168	1.2207	1.2207	4.2725	-0.61035
0.0506169	4.8828	-3.0518	15.869	1.8311
0.0507169	0	7.9346	14.038	-1.8311
0.0508169	-0.61035	-3.0518	15.259	-3.6621
0.050917	-1.8311	6.7139	8.5449	-4.2725
0.051017	3.0518	4.2725	14.648	-5.4932
0.051117	-1.8311	-1.8311	12.207	-1.2207
0.0512171	1.2207	7.9346	12.817	-0.61035
0.0513171	-1.8311	4.8828	14.038	2.4414
0.0514171	-0.61035	2.4414	11.597	0
0.0515172	1.2207	-2.4414	10.986	-1.8311
0.0516172	0	4.2725	6.1035	-1.8311
0.0517172	3.0518	3.0518	9.1553	-3.6621
0.0518173	0.61035	1.2207	7.3242	-4.2725
0.0519173	1.8311	-2.4414	1.2207	-7.9346
0.0520173	1.2207	3.0518	9.7656	-4.8828
0.0521174	2.4414	-2.4414	1.8311	-4.2725
0.0522174	5.4932	-0.61035	9.1553	3.6621
0.0523174	3.6621	1.2207	6.1035	-2.4414
0.0524175	-3.6621	3.6621	6.1035	-6.7139
0.0525175	3.0518	6.1035	-1.8311	-4.8828
0.0526175	-4.8828	2.4414	1.2207	-4.2725
0.0527176	4.2725	0.61035	3.0518	-6.1035
0.0528176	-0.61035	1.8311	0	-4.8828
0.0529176	-3.6621	5.4932	-0.61035	-10.986
0.0530177	4.8828	-1.2207	2.4414	-8.5449
0.0531177	0	-3.0518	6.1035	-7.3242
0.0532177	-2.4414	0	8.5449	-2.4414
0.0533178	5.4932	0	4.2725	0.61035
0.0534178	-7.9346	2.4414	7.9346	-3.6621
0.0535178	2.4414	-0.61035	7.3242	-4.8828
0.0536179	-1.2207	2.4414	10.376	-5.4932
0.0537179	6.1035	2.4414	3.0518	-3.0518
0.0538179	3.6621	6.7139	10.376	-4.8828
0.053918	-1.8311	1.8311	8.5449	-7.9346
0.054018	4.8828	-0.61035	8.5449	-0.61035
0.054118	1.2207	3.6621	0.61035	-0.61035
0.0542181	4.8828	7.9346	0.61035	4.2725
0.0543181	-2.4414	7.3242	1.2207	0
0.0544181	-5.4932	1.2207	-1.2207	7.9346
0.0545182	-3.0518	6.7139	-3.0518	1.8311
0.0546182	-1.8311	6.1035	-1.8311	0.61035
0.0547182	4.2725	1.2207	7.3242	6.7139
0.0548183	-6.7139	-0.61035	6.7139	-1.8311
0.0549183	1.8311	-3.0518	-2.4414	-3.0518
0.0550183	-0.61035	-1.8311	-0.61035	0
0.0551184	-2.4414	-3.0518	6.1035	1.8311
0.0552184	0	4.8828	0	-0.61035
0.0553184	0	-6.7139	-1.2207	0.61035
0.0554185	1.8311	1.2207	0.61035	0.61035
0.0555185	7.9346	4.8828	0.61035	-5.4932
0.0556185	0	6.1035	3.0518	5.4932
0.0557186	-1.8311	-1.2207	4.8828	2.4414
0.0558186	-7.3242	-0.61035	-2.4414	2.4414
0.0559186	-0.61035	1.8311	6.7139	-1.8311
0.0560187	-0.61035	1.8311	-1.8311	2.4414
0.0561187	1.2207	3.0518	1.8311	1.2207
0.0562187	-3.6621	-3.6621	1.8311	10.376
0.0563188	1.2207	-3.6621	-3.6621	2.4414
0.0564188	3.6621	-4.2725	-3.0518	0
0.0565188	3.0518	-3.6621	-1.2207	-3.6621
0.0566189	-9.1553	-0.61035	5.4932	-7.9346
0.0567189	-1.2207	1.2207	-3.0518	4.8828
0.0568189	-1.2207	-4.2725	0.61035	0
0.056919	-1.8311	-2.4414	-6.7139	-4.2725
0.057019	-1.2207	-1.8311	-6.7139	4.2725
0.057119	1.8311	-1.2207	-4.2725	10.986
0.0572191	-3.0518	-4.8828	-4.2725	0.61035
0.0573191	-7.9346	-1.8311	-1.2207	9.1553
0.0574191	0.61035	0.61035	2.4414	4.2725
0.0575192	-3.0518	4.8828	-1.8311	3.6621
0.0576192	-6.1035	2.4414	-3.0518	5.4932
0.0577192	-3.0518	0	-1.2207	1.8311
0.0578193	-0.61035	1.2207	0	-0.61035
0.0579193	0	10.986	7.9346	-1.2207
0.0580193	-2.4414	-0.61035	6.7139	-2.4414
0.0581194	-5.4932	1.8311	6.1035	0.61035
0.0582194	2.4414	-2.4414	3.0518	1.8311
0.0583194	6.1035	-0.61035	6.7139	0
0.0584195	7.3242	-2.4414	6.7139	-0.61035
0.0585195	1.8311	4.2725	10.986	10.376
0.0586195	2.4414	-1.8311	2.4414	4.8828
0.0587196	6.1035	0.61035	-0.61035	0
0.0588196	-2.4414	2.4414	0	-0.61035
0.0589196	-0.61035	4.2725	-2.4414	3.6621
0.0590197	-3.6621	-4.8828	7.9346	1.8311
0.0591197	3.0518	-1.8311	-0.61035	0
0.0592197	-4.2725	-2.4414	8.5449	-6.1035
0.0593198	-11.597	-3.6621	17.09	-2.4414
0.0594198	2.4414	-3.6621	10.376	0
0.0595198	-4.2725	-1.8311	-2.4414	5.4932
0.0596199	-2.4414	-2.4414	2.4414	0.61035
0.0597199	-2.4414	4.2725	4.2725	5.4932
0.0598199	-1.2207	1.8311	8.5449	4.8828
0.05992	-2.4414	-4.8828	1.2207	-6.1035
0.06002	2.4414	-8.5449	4.8828	-1.8311
0.06012	3.0518	-1.8311	8.5449	3.6621
0.0602201	-3.6621	2.4414	12.207	1.2207
0.0603201	-6.1035	-3.6621	14.648	-5.4932
0.0604201	-3.0518	3.0518	18.921	-0.61035
0.0605202	-1.2207	1.8311	9.1553	-3.6621
0.0606202	0.61035	0	11.597	5.4932
0.0607202	2.4414	4.2725	4.2725	2.4414
0.0608203	0	-4.2725	6.1035	1.8311
0.0609203	-2.4414	3.0518	7.9346	-1.8311
0.0610203	-1.2207	-1.8311	4.2725	1.8311
0.0611204	-4.2725	-2.4414	4.2725	1.8311
0.0612204	-1.2207	2.4414	2.4414	-4.2725
0.0613204	-4.8828	-3.0518	-0.61035	-6.1035
0.0614205	-1.2207	3.6621	-7.3242	-2.4414
0.0615205	1.2207	-3.0518	4.8828	-9.7656
0.0616205	3.0518	1.8311	-0.61035	-4.8828
0.0617206	0	2.4414	1.8311	-0.61035
0.0618206	2.4414	3.0518	-3.6621	0.61035
0.0619206	3.0518	7.3242	1.2207	-0.61035
0.0620207	-0.61035	3.6621	6.1035	4.2725
0.0621207	2.4414	-4.8828	-1.8311	0
0.0622207	-1.8311	-4.8828	-1.8311	-4.2725
0.0623208	0	6.1035	11.597	1.8311
0.0624208	-0.61035	1.2207	1.8311	-2.4414
0.0625208	-2.4414	4.2725	1.2207	0.61035
0.0626209	-1.8311	-4.2725	-7.9346	-0.61035
0.0627209	-1.8311	1.8311	1.2207	2.4414
0.0628209	1.2207	0.61035	6.7139	3.6621
0.062921	4.8828	2.4414	6.1035	1.8311
0.063021	3.6621	1.8311	4.8828	1.8311
0.063121	-7.3242	-1.2207	-0.61035	-1.2207
0.0632211	-0.61035	0.61035	8.5449	1.2207
0.0633211	1.8311	-6.1035	-1.2207	2.4414
0.0634211	4.8828	-1.8311	-0.61035	6.1035
0.0635212	-1.2207	-6.1035	6.7139	-0.61035
0.0636212	1.8311	3.0518	4.8828	1.8311
0.0637212	0	-6.1035	1.8311	-9.7656
0.0638213	-3.6621	-1.2207	-2.4414	-6.7139
0.0639213	2.4414	-1.2207	2.4414	-0.61035
0.0640213	2.4414	3.6621	4.2725	-3.0518
0.0641214	8.5449	-3.0518	-4.2725	-0.61035
0.0642214	-1.8311	-4.8828	3.6621	1.8311
0.0643214	1.8311	-1.8311	-1.8311	-1.2207
0.0644215	0	-3.0518	3.0518	-1.2207
0.0645215	-1.2207	-2.4414	3.0518	1.2207
0.0646215	1.2207	2.4414	0	1.8311
0.0647216	6.7139	9.7656	-1.2207	3.6621
0.0648216	-2.4414	-0.61035	2.4414	10.376
0.0649216	-6.1035	-4.2725	-1.2207	4.2725
0.0650217	6.7139	1.8311	6.7139	3.6621
0.0651217	0	10.376	-4.8828	0.61035
0.0652217	7.9346	7.3242	6.1035	2.4414
0.0653218	1.8311	9.1553	5.4932	-3.6621
0.0654218	-1.2207	2.4414	6.7139	2.4414
0.0655218	4.8828	2.4414	7.3242	-1.2207
0.0656219	-0.61035	-4.8828	10.376	3.0518
0.0657219	-3.6621	-1.2207	13.428	6.1035
0.0658219	-1.2207	4.2725	6.7139	1.2207
0.065922	-1.2207	4.2725	6.1035	6.1035
0.066022	-1.2207	4.8828	3.6621	5.4932
0.066122	-1.8311	-6.7139	6.7139	6.1035
0.0662221	0.61035	6.7139	8.5449	-2.4414
0.0663221	0.61035	-0.61035	4.8828	-2.4414
0.0664221	2.4414	0.61035	4.2725	-2.4414
0.0665222	-1.8311	4.2725	6.7139	-3.0518
0.0666222	4.2725	1.2207	5.4932	-3.0518
0.0667222	1.2207	0	6.7139	9.1553
0.0668223	1.8311	-2.4414	3.6621	-4.8828
0.0669223	1.8311	-5.4932	12.207	-4.2725
0.0670223	-7.3242	3.6621	7.9346	3.0518
0.0671224	3.0518	5.4932	8.5449	3.0518
0.0672224	-6.1035	6.7139	6.1035	-0.61035
0.0673224	-3.6621	1.8311	7.9346	0.61035
0.0674225	10.986	0.61035	4.2725	-6.7139
0.0675225	2.4414	0	4.2725	1.2207
0.0676225	-1.8311	-1.8311	7.3242	0
0.0677226	0.61035	3.0518	6.1035	-2.4414
0.0678226	1.2207	1.2207	5.4932	-3.0518
0.0679226	2.4414	-0.61035	-2.4414	-4.8828
0.0680227	-0.61035	-0.61035	1.2207	-8.5449
0.0681227	-1.8311	3.0518	1.8311	2.4414
0.0682227	-0.61035	-4.2725	3.0518	-2.4414
0.0683228	3.6621	-1.2207	-2.4414	-3.0518
0.0684228	3.0518	1.2207	8.5449	-6.1035
0.0685228	0	4.8828	6.1035	-3.6621
0.0686229	10.376	1.8311	6.7139	-1.8311
0.0687229	3.0518	-0.61035	-1.2207	4.8828
0.0688229	-1.2207	2.4414	9.7656	-7.3242
0.068923	0.61035	-1.2207	-1.2207	-5.4932
0.069023	1.8311	1.8311	9.1553	-5.4932
0.069123	-1.8311	-5.4932	7.3242	0.61035
0.0692231	-3.0518	-3.0518	6.1035	0
0.0693231	-2.4414	-1.2207	4.8828	3.6621
0.0694231	4.2725	1.2207	6.7139	0.61035
0.0695232	-0.61035	3.0518	9.1553	-0.61035
0.0696232	-3.0518	6.7139	10.376	-4.2725
0.0697232	-1.2207	4.2725	6.7139	5.4932
0.0698233	0	13.428	7.3242	3.6621
0.0699233	-0.61035	5.4932	4.8828	2.4414
0.0700233	1.2207	6.1035	7.9346	3.0518
0.0701234	-3.6621	7.3242	11.597	0.61035
0.0702234	-4.8828	6.1035	6.1035	4.8828
0.0703234	3.6621	-2.4414	-3.6621	-5.4932
0.0704235	2.4414	-4.2725	8.5449	-1.8311
0.0705235	0	-3.6621	10.376	0.61035
0.0706235	4.8828	7.9346	13.428	0
0.0707236	1.8311	-5.4932	2.4414	-1.8311
0.0708236	0.61035	1.2207	6.1035	-1.8311
0.0709236	-0.61035	-3.6621	8.5449	-4.2725
0.0710237	4.8828	-3.0518	11.597	-6.7139
0.0711237	3.6621	-1.8311	10.986	1.2207
0.0712237	-1.2207	-1.2207	14.648	-7.3242
0.0713238	2.4414	2.4414	6.1035	-3.0518
0.0714238	2.4414	2.4414	6.7139	-5.4932
0.0715238	-1.2207	-3.6621	14.038	1.8311
0.0716239	-0.61035	4.2725	6.7139	3.0518
0.0717239	1.8311	2.4414	1.2207	-3.6621
0.0718239	-8.5449	-3.6621	7.3242	6.1035
0.071924	1.2207	0.61035	7.9346	0
0.072024	6.7139	-2.4414	5.4932	-2.4414
0.072124	-1.2207	-5.4932	7.3242	-6.1035
0.0722241	1.8311	-0.61035	12.207	-6.1035
0.0723241	3.0518	1.8311	14.038	-1.2207
0.0724241	4.8828	-4.8828	4.8828	-0.61035
0.0725242	7.9346	1.8311	5.4932	-0.61035
0.0726242	1.8311	-0.61035	12.817	4.2725
0.0727242	1.2207	2.4414	11.597	-4.8828
0.0728243	-3.0518	1.8311	18.921	-10.986
0.0729243	5.4932	-3.0518	4.2725	-0.61035
0.0730243	-4.8828	4.2725	7.3242	-4.2725
0.0731244	-0.61035	-2.4414	6.7139	3.6621
0.0732244	12.817	4.2725	4.2725	2.4414
0.0733244	-3.0518	3.0518	-1.2207	3.0518
0.0734245	-0.61035	7.3242	4.8828	0.61035
0.0735245	3.0518	8.5449	4.2725	13.428
0.0736245	5.4932	9.1553	3.0518	-1.2207
0.0737246	-0.61035	3.6621	-3.0518	-4.2725
0.0738246	0	3.0518	-6.1035	-6.1035
0.0739246	0.61035	0	0	0
0.0740247	4.8828	0	10.376	1.2207
0.0741247	-3.0518	-1.2207	-4.2725	0
0.0742247	-1.8311	2.4414	1.8311	0
0.0743248	-2.4414	-0.61035	-7.3242	0.61035
0.0744248	-3.6621	6.7139	-3.6621	-1.8311
0.0745248	9.1553	-0.61035	-5.4932	0.61035
0.0746249	-3.6621	3.6621	-5.4932	2.4414
0.0747249	-7.9346	-5.4932	6.1035	8.5449
0.0748249	-3.0518	-4.2725	-0.61035	0
0.074925	0.61035	2.4414	1.8311	-0.61035
0.075025	-3.0518	-1.2207	-2.4414	-3.0518
0.075125	0	-0.61035	-0.61035	-2.4414
0.0752251	0.61035	0.61035	1.2207	-1.8311
0.0753251	0.61035	3.0518	6.1035	-2.4414
0.0754251	0.61035	-4.2725	7.3242	1.8311
0.0755252	-2.4414	-1.8311	3.0518	-0.61035
0.0756252	0.61035	1.2207	1.8311	4.8828
0.0757252	0	-4.2725	3.6621	4.8828
0.0758253	0.61035	2.4414	0.61035	0
0.0759253	-2.4414	-1.2207	3.6621	-2.4414
0.0760253	2.4414	-0.61035	-6.1035	0.61035
0.0761254	4.8828	-2.4414	-0.61035	11.597
0.0762254	4.2725	1.2207	6.7139	4.8828
0.0763254	1.2207	-1.2207	7.3242	-2.4414
0.0764255	6.1035	0	9.1553	6.1035
0.0765255	-3.6621	1.2207	0	2.4414
0.0766255	1.2207	-1.8311	-1.8311	7.9346
0.0767256	1.8311	-1.2207	4.2725	0
0.0768256	-1.8311	0	2.4414	-0.61035
0.0769256	4.2725	4.2725	4.2725	4.8828
0.0770257	2.4414	0	0.61035	3.6621
0.0771257	-5.4932	5.4932	3.6621	1.8311
0.0772257	-4.2725	-0.61035	0.61035	-2.4414
0.0773258	1.8311	-2.4414	0.61035	0.61035
0.0774258	3.6621	0.61035	4.2725	2.4414
0.0775258	-4.2725	1.8311	-3.6621	-1.8311
0.0776259	2.4414	3.6621	4.8828	-1.2207
0.0777259	2.4414	0	-4.8828	-0.61035
0.0778259	2.4414	1.2207	1.2207	-6.7139
0.077926	-0.61035	-3.0518	4.8828	-1.8311
0.078026	-4.8828	2.4414	0.61035	-7.3242
0.078126	5.4932	-1.2207	7.3242	1.2207
0.0782261	1.2207	-4.2725	2.4414	-4.2725
0.0783261	2.4414	-1.8311	8.5449	-1.2207
0.0784261	-2.4414	-0.61035	-3.6621	-1.2207
0.0785262	0.61035	0	3.6621	-1.2207
0.0786262	-6.1035	0	-0.61035	-3.0518
0.0787262	-0.61035	-1.2207	2.4414	-1.2207
0.0788263	3.6621	6.1035	2.4414	-0.61035
0.0789263	-4.2725	-3.0518	-7.9346	-0.61035
0.0790263	2.4414	-1.8311	0	1.2207
0.0791264	6.1035	3.0518	3.0518	0
0.0792264	1.2207	0.61035	-3.6621	1.2207
0.0793264	0	0.61035	0.61035	-3.6621
0.0794265	-2.4414	-4.2725	3.0518	4.2725
0.0795265	1.2207	3.0518	7.3242	7.3242
0.0796265	2.4414	0	8.5449	-3.6621
0.0797266	4.2725	-1.2207	10.376	3.0518
0.0798266	4.8828	1.2207	1.8311	-0.61035
0.0799266	-0.61035	8.5449	3.6621	4.8828
0.0800267	-0.61035	1.8311	1.2207	1.2207
0.0801267	-2.4414	3.6621	10.986	3.6621
0.0802267	-1.2207	3.0518	5.4932	3.0518
0.0803268	-2.4414	6.7139	7.9346	1.8311
0.0804268	4.8828	0.61035	2.4414	0.61035
0.0805268	-1.8311	-1.2207	-1.2207	0.61035
0.0806269	1.2207	-3.6621	-3.6621	1.8311
0.0807269	5.4932	-3.6621	-2.4414	0
0.0808269	6.7139	4.8828	0.61035	-2.4414
0.080927	2.4414	-1.8311	-1.2207	-6.1035
0.081027	0.61035	1.8311	-0.61035	-7.9346
0.081127	-4.2725	-0.61035	-3.6621	-6.1035
0.0812271	0	2.4414	3.0518	-3.0518
0.0813271	-3.0518	0.61035	6.7139	-7.9346
0.0814271	0.61035	1.8311	1.2207	-3.6621
0.0815272	-3.6621	9.1553	0.61035	-6.7139
0.0816272	2.4414	-4.2725	-3.6621	-1.2207
0.0817272	0	-1.2207	0	-6.7139
0.0818273	6.1035	4.2725	1.2207	-5.4932
0.0819273	3.6621	6.7139	0	-1.8311
0.0820273	1.2207	0	2.4414	3.6621
0.0821274	-2.4414	-3.0518	0.61035	-5.4932
0.0822274	2.4414	6.1035	-2.4414	-6.1035
0.0823274	0	-1.2207	-6.1035	1.2207
0.0824275	8.5449	2.4414	1.8311	0.61035
0.0825275	3.0518	2.4414	5.4932	-10.376
0.0826275	1.8311	0.61035	9.1553	-10.986
0.0827276	3.6621	1.2207	-2.4414	-1.2207
0.0828276	7.3242	0	-2.4414	-0.61035
0.0829276	5.4932	-4.8828	4.8828	-3.6621
0.0830277	4.2725	3.0518	1.8311	1.2207
0.0831277	2.4414	8.5449	-3.0518	0
0.0832277	-0.61035	1.8311	1.2207	-6.1035
0.0833278	1.2207	5.4932	3.0518	0
0.0834278	-1.2207	1.2207	-6.1035	1.8311
0.0835278	-1.8311	-0.61035	-0.61035	-1.8311
0.0836279	5.4932	-0.61035	3.0518	-8.5449
0.0837279	-7.3242	4.2725	3.0518	-9.1553
0.0838279	3.0518	3.0518	6.7139	-3.6621
0.083928	4.8828	0.61035	4.8828	-1.8311
0.084028	-8.5449	7.3242	1.8311	-2.4414
0.084128	-1.2207	5.4932	9.7656	-4.2725
0.0842281	-3.6621	0.61035	0.61035	-1.2207
0.0843281	-0.61035	4.2725	0	-6.1035
0.0844281	0.61035	-2.4414	1.8311	-7.9346
0.0845282	-3.0518	3.0518	-0.61035	-4.2725
0.0846282	2.4414	-0.61035	-2.4414	-6.1035
0.0847282	0.61035	4.2725	1.8311	-7.9346
0.0848283	3.0518	4.2725	0.61035	-3.6621
0.0849283	-0.61035	0.61035	-1.8311	-3.0518
0.0850283	0	-1.8311	-3.6621	-2.4414
0.0851284	-4.2725	5.4932	-2.4414	0
0.0852284	-0.61035	0	1.8311	-0.61035
0.0853284	11.597	-5.4932	-0.61035	7.9346
0.0854285	1.2207	1.8311	3.6621	1.2207
0.0855285	0	1.2207	-10.376	2.4414
0.0856285	7.3242	1.8311	0	3.6621
0.0857286	-1.2207	-2.4414	-4.2725	2.4414
0.0858286	1.2207	4.2725	1.2207	0.61035
0.0859286	-4.8828	3.0518	0	1.2207
0.0860287	-3.6621	-0.61035	4.2725	0
0.0861287	1.2207	-3.6621	6.1035	3.6621
0.0862287	0.61035	0.61035	-3.0518	-3.6621
0.0863288	4.8828	6.7139	1.2207	1.8311
0.0864288	1.8311	3.6621	3.0518	-6.1035
0.0865288	3.6621	-5.4932	-1.8311	-2.4414
0.0866289	-1.8311	0.61035	0.61035	-1.2207
0.0867289	0.61035	1.2207	-1.2207	-1.8311
0.0868289	-1.8311	4.2725	-3.0518	0.61035
0.086929	3.0518	7.3242	7.3242	6.1035
0.087029	-0.61035	3.6621	7.9346	0
0.087129	-8.5449	2.4414	2.4414	-0.61035
0.0872291	-1.8311	-4.2725	4.8828	-3.6621
0.0873291	3.0518	3.6621	3.6621	0
0.0874291	-2.4414	3.0518	-3.6621	-1.8311
0.0875292	-4.2725	7.9346	-2.4414	3.6621
0.0876292	1.8311	1.8311	-3.0518	7.3242
0.0877292	-2.4414	-2.4414	-6.1035	-1.2207
0.0878293	0.61035	-6.1035	-3.0518	3.6621
0.0879293	1.8311	2.4414	6.7139	-0.61035
0.0880293	-4.2725	1.2207	8.5449	1.8311
0.0881294	2.4414	0	1.2207	7.3242
0.0882294	-5.4932	4.8828	1.2207	1.2207
0.0883294	-1.2207	-2.4414	5.4932	6.7139
0.0884295	-0.61035	6.1035	-1.8311	1.2207
0.0885295	5.4932	10.376	-3.0518	0
0.0886295	-3.6621	1.2207	-1.2207	-7.9346
0.0887296	-6.1035	4.2725	-3.0518	-1.2207
0.0888296	2.4414	0.61035	1.2207	-1.8311
0.0889296	-3.6621	-0.61035	-1.8311	7.3242
0.0890297	-4.2725	-6.1035	-0.61035	-4.8828
0.0891297	-3.6621	8.5449	3.0518	0
0.0892297	0	-1.2207	0.61035	2.4414
0.0893298	4.8828	4.2725	-0.61035	-2.4414
0.0894298	-0.61035	-1.8311	1.2207	-3.6621
0.0895298	0.61035	-1.2207	-1.8311	-3.6621
0.0896299	0.61035	-6.1035	-0.61035	-7.9346
0.0897299	-2.4414	-3.6621	7.3242	-5.4932
0.0898299	1.2207	6.7139	-0.61035	-5.4932
0.08993	-4.2725	-1.2207	1.2207	-3.0518
0.09003	1.8311	-3.6621	-6.1035	-3.6621
0.09013	0	-5.4932	-5.4932	1.8311
0.0902301	-10.376	1.2207	3.0518	-6.7139
0.0903301	-5.4932	-1.2207	6.1035	3.0518
0.0904301	-4.2725	0	0	-3.0518
0.0905302	-3.0518	-3.6621	3.6621	-3.6621
0.0906302	-3.0518	4.2725	0	-5.4932
0.0907302	1.2207	4.2725	-1.8311	-4.2725
0.0908303	-1.8311	0.61035	-1.8311	1.8311
0.0909303	0	2.4414	-1.2207	1.8311
0.0910303	0.61035	0.61035	1.2207	-6.7139
0.0911304	3.0518	3.0518	-4.8828	-1.8311
0.0912304	-5.4932	0.61035	-1.8311	0.61035
0.0913304	-2.4414	-3.6621	0.61035	-4.2725
0.0914305	3.6621	0.61035	4.2725	-4.2725
0.0915305	3.0518	-1.2207	2.4414	-5.4932
0.0916305	4.8828	3.6621	6.1035	-4.8828
0.0917306	2.4414	-0.61035	-2.4414	-9.7656
0.0918306	1.2207	-4.8828	6.1035	0
0.0919306	-4.8828	4.8828	-1.2207	-3.0518
0.0920307	-1.2207	4.8828	3.0518	0.61035
0.0921307	3.0518	5.4932	-2.4414	-6.7139
0.0922307	6.7139	0	1.2207	-1.8311
0.0923308	0	1.2207	7.9346	-4.8828
0.0924308	-0.61035	0.61035	-3.6621	2.4414
0.0925308	-3.6621	0	7.3242	4.2725
0.0926309	-0.61035	1.2207	-2.4414	-6.7139
0.0927309	2.4414	-5.4932	-7.3242	-3.0518
0.0928309	-2.4414	3.0518	-9.1553	0
0.092931	-8.5449	0.61035	0	1.2207
0.093031	1.2207	-0.61035	0.61035	-0.61035
0.093131	-0.61035	1.2207	-3.6621	-1.2207
0.0932311	1.8311	1.2207	-2.4414	3.0518
0.0933311	-0.61035	-3.6621	3.0518	-3.0518
0.0934311	5.4932	0.61035	-1.8311	-4.2725
0.0935312	6.1035	3.0518	-3.0518	2.4414
0.0936312	1.8311	-4.2725	-4.2725	-1.2207
0.0937312	1.2207	-3.6621	-1.8311	-5.4932
0.0938313	5.4932	0.61035	0	-1.8311
0.0939313	0.61035	5.4932	-3.0518	-6.1035
0.0940313	-4.2725	6.7139	3.6621	-1.2207
0.0941314	4.8828	0	-0.61035	0.61035
0.0942314	-4.2725	4.8828	4.2725	-0.61035
0.0943314	2.4414	7.3242	-0.61035	0
0.0944315	0	-0.61035	-7.3242	-1.2207
0.0945315	-1.8311	3.6621	1.8311	4.2725
0.0946315	-1.2207	-5.4932	-1.8311	1.2207
0.0947316	-4.2725	0.61035	-1.2207	-9.7656
0.0948316	-3.0518	4.2725	2.4414	4.2725
0.0949316	1.2207	-6.7139	0	-3.6621
0.0950317	4.8828	-3.6621	-3.0518	-3.6621
0.0951317	4.8828	1.2207	0.61035	-4.8828
0.0952317	4.2725	0	-1.8311	-1.8311
0.0953318	3.6621	3.6621	-3.6621	-2.4414
0.0954318	3.6621	3.6621	-2.4414	-3.0518
0.0955318	-3.6621	-1.8311	3.6621	-6.7139
0.0956319	2.4414	1.8311	9.1553	-12.817
0.0957319	-1.8311	-0.61035	-1.2207	-1.2207
0.0958319	-3.0518	-2.4414	-1.2207	0
0.095932	-6.1035	3.0518	-3.0518	-0.61035
0.096032	-2.4414	4.2725	0	-1.8311
0.096132	-0.61035	-2.4414	0.61035	-3.6621
0.0962321	3.6621	3.0518	1.8311	-4.2725
0.0963321	-1.8311	-4.2725	0	-1.2207
0.0964321	0	0.61035	-7.9346	-3.6621
0.0965322	4.2725	0	-6.1035	-2.4414
0.0966322	1.2207	0	-1.2207	-1.8311
0.0967322	3.6621	4.8828	0	-10.986
0.0968323	7.3242	1.8311	4.8828	-6.1035
0.0969323	-2.4414	1.8311	-6.1035	-1.2207
0.0970323	-4.2725	3.0518	-2.4414	-11.597
0.0971324	0.61035	0	-6.7139	-7.3242
0.0972324	-3.6621	-3.0518	4.2725	-4.8828
0.0973324	0	1.8311	0	-2.4414
0.0974325	-3.0518	3.6621	-3.6621	-4.8828
0.0975325	-6.1035	7.9346	-4.8828	-6.7139
0.0976325	3.6621	-3.0518	-0.61035	-1.8311
0.0977326	0	9.1553	4.8828	0
0.0978326	3.6621	0	-5.4932	-5.4932
0.0979326	0.61035	4.2725	-4.8828	-3.6621
0.0980327	1.2207	5.4932	-5.4932	-5.4932
0.0981327	2.4414	2.4414	-3.6621	-15.259
0.0982327	-2.4414	3.6621	-2.4414	-12.207
0.0983328	1.8311	4.2725	3.6621	-7.9346
0.0984328	1.8311	3.0518	6.7139	-2.4414
0.0985328	3.0518	-4.8828	3.0518	-6.1035
0.0986329	0.61035	-6.1035	-3.0518	-1.2207
0.0987329	0.61035	3.0518	4.2725	-0.61035
0.0988329	-4.2725	1.8311	5.4932	-10.376
0.098933	-3.0518	2.4414	0.61035	-2.4414
0.099033	0.61035	3.6621	-2.4414	-4.2725
0.099133	-6.7139	-0.61035	5.4932	-5.4932
0.0992331	0	-5.4932	3.6621	-9.7656
0.0993331	-1.8311	2.4414	-3.6621	-7.3242
0.0994331	6.1035	1.2207	5.4932	-1.2207
0.0995332	6.7139	1.2207	1.2207	-3.0518
0.0996332	3.6621	4.8828	4.8828	-2.4414
0.0997332	-4.2725	-4.8828	-3.6621	-3.6621
0.0998333	-2.4414	-1.2207	0.61035	-10.376
0.0999333	-1.8311	1.2207	-1.2207	-2.4414
0.100033	0.61035	5.4932	0.61035	-1.8311
0.100133	5.4932	-1.2207	4.8828	-5.4932
0.100233	-1.8311	2.4414	3.6621	-1.8311
0.100333	1.2207	-0.61035	1.2207	-4.8828
0.100433	-3.0518	1.8311	2.4414	1.2207
0.100534	-7.3242	3.6621	11.597	-8.5449
0.100634	3.0518	0.61035	4.2725	-3.6621
0.100734	0.61035	-0.61035	11.597	1.8311
0.100834	1.2207	-1.8311	6.7139	-4.2725
0.100934	0.61035	-1.2207	7.9346	1.2207
0.101034	5.4932	3.0518	1.2207	-6.7139
0.101134	6.1035	3.6621	5.4932	-2.4414
0.101234	-1.8311	-2.4414	1.8311	2.4414
0.101334	-4.8828	-8.5449	1.2207	-7.9346
0.101434	0.61035	-3.6621	6.1035	-4.8828
0.101534	3.0518	0.61035	-3.6621	0
0.101634	1.8311	-1.8311	1.8311	-1.2207
0.101734	3.6621	0	0	0.61035
0.101834	3.6621	2.4414	4.8828	-3.0518
0.101934	3.6621	2.4414	1.2207	-1.8311
0.102034	4.2725	2.4414	-0.61035	-1.2207
0.102134	0	-0.61035	2.4414	0
0.102234	-3.6621	-2.4414	-2.4414	-6.7139
0.102334	0.61035	0.61035	0	-7.9346
0.102434	1.8311	-7.9346	-7.3242	-3.6621
0.102534	-0.61035	0	-4.8828	-6.7139
0.102634	0.61035	-4.2725	-2.4414	-6.1035
0.102734	-4.2725	-3.6621	5.4932	-6.7139
0.102834	-7.3242	3.6621	2.4414	-1.2207
0.102934	3.0518	4.2725	-4.2725	-4.2725
0.103034	0	-4.2725	6.7139	-1.8311
0.103134	1.8311	-5.4932	9.1553	0
0.103234	-1.2207	-0.61035	6.7139	6.1035
0.103334	1.8311	0	-1.8311	0
0.103434	-1.2207	-2.4414	5.4932	-4.2725
0.103535	-5.4932	-2.4414	-3.6621	-4.8828
0.103635	3.6621	0.61035	7.3242	-3.6621
0.103735	1.8311	-1.8311	7.3242	-4.2725
0.103835	-4.2725	1.8311	0.61035	1.2207
0.103935	0.61035	-1.2207	6.7139	-3.0518
0.104035	-4.8828	3.0518	6.1035	-2.4414
0.104135	-6.1035	4.2725	7.9346	-1.2207
0.104235	2.4414	0	9.1553	-0.61035
0.104335	-3.0518	2.4414	-0.61035	0
0.104435	1.8311	-1.2207	-6.1035	-6.1035
0.104535	-6.1035	-2.4414	1.2207	4.2725
0.104635	3.6621	3.0518	-2.4414	-8.5449
0.104735	-4.8828	1.8311	1.8311	0
0.104835	-3.6621	7.3242	-0.61035	-7.9346
0.104935	0	-0.61035	2.4414	-1.8311
0.105035	-2.4414	-3.0518	9.1553	3.0518
0.105135	4.2725	-4.8828	-1.8311	-6.7139
0.105235	6.1035	-4.8828	4.8828	0
0.105335	0.61035	-6.1035	-0.61035	-8.5449
0.105435	2.4414	2.4414	3.0518	-0.61035
0.105535	3.6621	3.6621	10.986	-1.8311
0.105635	5.4932	6.1035	3.6621	2.4414
0.105735	-7.9346	-1.8311	3.6621	1.2207
0.105835	-10.376	8.5449	11.597	-5.4932
0.105935	-3.0518	-1.8311	3.0518	-1.8311
0.106035	-3.0518	0.61035	0	-0.61035
0.106135	1.2207	-4.2725	2.4414	0.61035
0.106235	-4.8828	0.61035	3.0518	2.4414
0.106335	-0.61035	0	-4.8828	1.2207
0.106435	4.8828	-5.4932	-4.8828	-6.1035
0.106536	-3.6621	1.2207	-3.6621	-8.5449
0.106636	0.61035	6.1035	0	-4.2725
0.106736	3.0518	-2.4414	-0.61035	-7.3242
0.106836	0.61035	-5.4932	-2.4414	0
0.106936	0	0.61035	0.61035	-1.8311
0.107036	-4.8828	-4.8828	-3.0518	-0.61035
0.107136	4.8828	-0.61035	1.8311	-1.8311
0.107236	-2.4414	-0.61035	6.7139	0.61035
0.107336	1.8311	3.0518	-10.986	1.2207
0.107436	-1.8311	6.1035	-4.8828	-5.4932
0.107536	-1.2207	-3.6621	-4.2725	-5.4932
0.107636	-1.8311	-2.4414	-1.2207	-3.0518
0.107736	1.8311	1.2207	1.8311	-4.8828
0.107836	3.6621	0	1.2207	6.7139
0.107936	2.4414	1.2207	-5.4932	1.2207
0.108036	-4.2725	-1.2207	-0.61035	-1.2207
0.108136	1.2207	-3.6621	4.2725	3.6621
0.108236	-6.7139	1.8311	4.2725	-0.61035
0.108336	-1.2207	-1.8311	-5.4932	-6.7139
0.108436	-3.6621	0.61035	-4.8828	-2.4414
0.108536	-1.2207	-0.61035	-9.7656	-4.8828
0.108636	-0.61035	4.2725	-7.9346	-6.1035
0.108736	-1.2207	1.8311	-7.9346	3.6621
0.108836	0.61035	1.2207	-3.0518	-1.2207
0.108936	9.1553	2.4414	-7.3242	-1.8311
0.109036	7.3242	-0.61035	-3.0518	-6.7139
0.109136	0	5.4932	-2.4414	-9.1553
0.109236	4.2725	7.3242	-8.5449	-7.3242
0.109336	1.2207	10.986	1.8311	-0.61035
0.109436	-8.5449	-1.8311	-3.0518	-5.4932
0.109537	11.597	3.0518	1.8311	3.0518
0.109637	2.4414	-7.3242	1.2207	4.8828
0.109737	7.3242	-0.61035	-7.9346	4.8828
0.109837	5.4932	1.8311	-3.0518	0.61035
0.109937	2.4414	-4.2725	-3.6621	3.0518
0.110037	3.0518	1.2207	-3.0518	-1.8311
0.110137	0	-3.6621	-3.0518	3.0518
0.110237	-3.0518	1.2207	-1.8311	-4.8828
0.110337	-13.428	2.4414	-6.1035	2.4414
0.110437	0.61035	-0.61035	-3.6621	0
0.110537	1.2207	0.61035	-1.8311	-4.8828
0.110637	7.3242	0.61035	-3.6621	-13.428
0.110737	0	7.9346	1.2207	-1.2207
0.110837	4.2725	-1.8311	-0.61035	-7.3242
0.110937	-4.2725	9.1553	-4.8828	-0.61035
0.111037	6.7139	1.8311	-3.6621	3.6621
0.111137	0.61035	1.8311	-4.8828	0.61035
0.111237	4.2725	4.2725	-3.6621	-4.2725
0.111337	-1.2207	-12.207	-6.1035	0.61035
0.111437	3.6621	1.8311	-9.7656	4.8828
0.111537	3.0518	4.2725	-1.8311	-10.376
0.111637	-3.0518	0	-3.0518	-3.0518
0.111737	-0.61035	-2.4414	-1.8311	-2.4414
0.111837	-0.61035	0.61035	-7.9346	-1.2207
0.111937	-6.7139	-2.4414	-8.5449	-5.4932
0.112037	-3.0518	-0.61035	-10.376	1.8311
0.112137	-2.4414	-6.7139	-9.7656	-1.8311
0.112237	5.4932	0	-7.3242	-0.61035
0.112337	7.3242	3.6621	-8.5449	-4.8828
0.112437	-0.61035	-2.4414	2.4414	4.2725
0.112538	8.5449	-3.6621	1.2207	1.8311
0.112638	-2.4414	-1.8311	3.6621	2.4414
0.112738	3.0518	-0.61035	4.8828	1.2207
0.112838	-3.0518	3.6621	-2.4414	-0.61035
0.112938	1.2207	4.2725	1.2207	-7.3242
0.113038	-1.2207	1.2207	1.2207	-6.1035
0.113138	-8.5449	0	2.4414	-8.5449
0.113238	3.0518	0	6.1035	-6.7139
0.113338	3.6621	-3.0518	3.6621	0.61035
0.113438	-4.8828	-8.5449	0	-11.597
0.113538	-1.2207	-2.4414	0	-4.2725
0.113638	1.8311	-3.6621	1.2207	-1.8311
0.113738	-4.8828	-6.7139	5.4932	2.4414
0.113838	-1.8311	-1.2207	9.7656	-4.2725
0.113938	-0.61035	0.61035	1.2207	2.4414
0.114038	-1.8311	0	1.8311	4.8828
0.114138	-2.4414	1.2207	0	0.61035
0.114238	-0.61035	3.0518	2.4414	0
0.114338	-2.4414	0.61035	7.9346	1.2207
0.114438	-4.2725	1.8311	5.4932	-1.8311
0.114538	-0.61035	4.2725	7.3242	-3.6621
0.114638	3.6621	-2.4414	5.4932	-4.2725
0.114738	3.6621	3.0518	8.5449	-2.4414
0.114838	1.2207	-1.2207	6.7139	-5.4932
0.114938	-2.4414	-1.2207	-3.6621	-1.2207
0.115038	0	3.6621	4.2725	-0.61035
0.115138	4.2725	3.6621	5.4932	1.2207
0.115238	0	0	-0.61035	-0.61035
0.115338	4.8828	2.4414	4.8828	-9.7656
0.115438	-1.2207	-4.2725	0	-5.4932
0.115539	3.6621	-0.61035	3.0518	-1.8311
0.115639	-0.61035	-3.0518	0.61035	-6.7139
0.115739	-5.4932	4.8828	6.1035	-6.7139
0.115839	-3.0518	3.6621	6.7139	-2.4414
0.115939	-3.0518	-3.0518	0	-5.4932
0.116039	0.61035	3.6621	7.3242	-4.2725
0.116139	-3.0518	-1.2207	7.3242	-1.8311
0.116239	-1.8311	1.8311	7.3242	-1.8311
0.116339	3.0518	-4.8828	-1.2207	-3.6621
0.116439	6.1035	3.0518	-1.8311	-0.61035
0.116539	2.4414	3.0518	0.61035	-5.4932
0.116639	-4.2725	-1.2207	0.61035	-5.4932
0.116739	-11.597	-3.0518	-2.4414	-0.61035
0.116839	2.4414	-3.0518	-8.5449	-6.1035
0.116939	-3.0518	-2.4414	2.4414	-6.1035
0.117039	-1.8311	-4.2725	0	-3.6621
0.117139	-1.2207	-2.4414	2.4414	-2.4414
0.117239	1.8311	-1.2207	-3.6621	0
0.117339	2.4414	7.9346	8.5449	-4.2725
0.117439	6.7139	-2.4414	-2.4414	-3.0518
0.117539	-4.8828	0.61035	-0.61035	-3.0518
0.117639	0	-6.7139	4.2725	0
0.117739	0.61035	1.2207	0	8.5449
0.117839	-2.4414	6.1035	2.4414	6.7139
0.117939	-1.2207	-4.2725	3.6621	3.0518
0.118039	-1.2207	4.8828	-0.61035	1.8311
0.118139	0	-3.6621	-0.61035	6.1035
0.118239	-4.8828	-3.6621	1.2207	0
0.118339	-1.8311	1.2207	3.0518	2.4414
0.118439	-6.1035	-3.6621	-7.3242	1.2207
0.11854	0.61035	10.376	-4.8828	4.2725
0.11864	6.7139	-3.0518	-4.8828	-1.8311
0.11874	-1.2207	-1.8311	-7.3242	-4.8828
0.11884	2.4414	-5.4932	-2.4414	-7.3242
0.11894	3.0518	1.2207	-9.7656	0
0.11904	-3.0518	-1.2207	-2.4414	-4.8828
0.11914	-4.8828	-4.2725	1.2207	-2.4414
0.11924	1.8311	-3.0518	1.2207	-7.9346
0.11934	-0.61035	-0.61035	1.2207	-9.7656
0.11944	-6.7139	-3.0518	-4.8828	-0.61035
0.11954	1.2207	3.6621	-7.9346	0.61035
0.11964	3.0518	6.1035	-0.61035	1.2207
0.11974	2.4414	2.4414	-0.61035	1.8311
0.11984	-3.0518	1.8311	-4.8828	-7.9346
0.11994	-0.61035	1.2207	6.1035	2.4414
0.12004	0.61035	9.1553	2.4414	0.61035
0.12014	-6.7139	-1.8311	1.2207	3.6621
0.12024	-0.61035	0.61035	-4.2725	-0.61035
0.12034	3.0518	2.4414	1.8311	-1.2207
0.12044	1.2207	3.0518	4.2725	0
0.12054	-3.6621	-1.8311	-1.2207	-4.8828
0.12064	-1.2207	-1.2207	7.3242	2.4414
0.12074	1.2207	5.4932	-5.4932	1.8311
0.12084	3.6621	-2.4414	2.4414	0
0.12094	-3.0518	7.3242	-0.61035	-3.0518
0.12104	-4.8828	3.6621	-3.0518	-3.6621
0.12114	-0.61035	4.2725	-3.6621	3.0518
0.12124	4.2725	-3.0518	4.2725	3.6621
0.12134	-1.2207	4.8828	0	3.0518
0.12144	3.0518	-0.61035	-6.7139	-4.2725
0.121541	0.61035	3.6621	2.4414	-3.0518
0.121641	-1.2207	-1.2207	-1.2207	-7.3242
0.121741	-8.5449	2.4414	-4.8828	-3.6621
0.121841	-3.0518	-4.8828	-1.2207	-2.4414
0.121941	0.61035	2.4414	-1.8311	0
0.122041	-3.0518	-5.4932	-3.6621	-2.4414
0.122141	1.8311	6.7139	-6.1035	4.8828
0.122241	0.61035	-2.4414	-10.986	0
0.122341	2.4414	-5.4932	-6.7139	2.4414
0.122441	1.8311	-2.4414	-4.2725	4.2725
0.122541	-6.1035	-2.4414	-3.6621	3.0518
0.122641	-3.0518	3.6621	-9.7656	-0.61035
0.122741	-7.3242	-3.0518	-5.4932	1.2207
0.122841	-4.8828	0	-4.8828	3.0518
0.122941	4.8828	-4.8828	-6.7139	1.8311
0.123041	-2.4414	-4.8828	-0.61035	2.4414
0.123141	-0.61035	-2.4414	0	0
0.123241	0.61035	-3.6621	-2.4414	1.8311
0.123341	-4.8828	0.61035	-4.2725	3.6621
0.123441	-2.4414	7.3242	-2.4414	0.61035
0.123541	-4.8828	-2.4414	-4.8828	-0.61035
0.123641	-4.8828	-5.4932	-6.1035	-7.9346
0.123741	7.9346	-3.0518	-7.3242	-4.2725
0.123841	0.61035	-9.7656	1.8311	-5.4932
0.123941	-0.61035	6.7139	-5.4932	-4.8828
0.124041	-0.61035	3.0518	-7.3242	-4.2725
0.124141	3.6621	-3.6621	-3.0518	3.0518
0.124241	3.0518	4.8828	0.61035	5.4932
0.124341	-0.61035	-4.2725	-4.2725	1.8311
0.124441	-1.8311	-1.8311	-14.648	3.0518
0.124542	3.0518	1.8311	1.8311	-4.2725
0.124642	4.2725	4.2725	-7.9346	-0.61035
0.124742	3.0518	3.0518	-6.7139	-6.1035
0.124842	-3.0518	0.61035	-0.61035	0
0.124942	-1.2207	-0.61035	-1.8311	-8.5449
0.125042	3.0518	-2.4414	-1.8311	-0.61035
0.125142	4.8828	0.61035	-10.376	-5.4932
0.125242	3.6621	-0.61035	-0.61035	3.0518
0.125342	-2.4414	0.61035	-3.6621	4.8828
0.125442	1.2207	4.8828	1.2207	-1.2207
0.125542	2.4414	-2.4414	-6.1035	-4.8828
0.125642	1.2207	2.4414	-2.4414	-7.3242
0.125742	-4.8828	0	1.2207	1.2207
0.125842	-1.2207	-3.6621	-3.0518	0
0.125942	-7.3242	-1.8311	-3.6621	-3.0518
0.126042	-1.2207	1.2207	1.2207	-3.0518
0.126142	-4.2725	5.4932	4.2725	1.8311
0.126242	-3.0518	0.61035	6.7139	4.2725
0.126342	3.6621	0.61035	6.7139	-0.61035
0.126442	-1.2207	-1.8311	1.2207	2.4414
0.126542	1.8311	5.4932	8.5449	0
0.126642	6.7139	0	-3.6621	4.2725
0.126742	2.4414	7.9346	5.4932	-1.2207
0.126842	0.61035	-1.8311	0	-0.61035
0.126942	-6.7139	-1.2207	-1.8311	1.8311
0.127042	-2.4414	3.6621	3.6621	3.6621
0.127142	-0.61035	-4.8828	5.4932	0.61035
0.127242	-0.61035	4.2725	-3.0518	-1.8311
0.127342	-4.2725	-1.2207	3.6621	-1.8311
0.127442	0	-4.2725	-1.8311	0
0.127543	2.4414	-1.8311	0.61035	4.2725
0.127643	-1.2207	1.2207	-3.0518	9.7656
0.127743	5.4932	2.4414	-2.4414	0
0.127843	-2.4414	-5.4932	-3.6621	2.4414
0.127943	0	-3.0518	-6.7139	6.1035
0.128043	0	0.61035	-8.5449	-3.6621
0.128143	10.986	0	-6.7139	-2.4414
0.128243	-1.8311	1.2207	-4.2725	-10.986
0.128343	-5.4932	6.1035	0.61035	0
0.128443	-3.6621	1.2207	-4.2725	-2.4414
0.128543	-0.61035	1.8311	-3.0518	0.61035
0.128643	-3.6621	3.6621	3.0518	0
0.128743	3.6621	-1.8311	9.7656	-1.2207
0.128843	-4.8828	1.8311	-1.8311	-0.61035
0.128943	0.61035	-1.8311	-8.5449	4.8828
0.129043	2.4414	1.2207	-4.8828	0.61035
0.129143	-1.8311	0.61035	-6.7139	3.6621
0.129243	-6.1035	3.0518	0.61035	-1.8311
0.129343	0.61035	-2.4414	-9.1553	-0.61035
0.129443	1.2207	-6.1035	-5.4932	3.0518
0.129543	-0.61035	1.2207	-7.3242	0
0.129643	2.4414	0.61035	-4.8828	4.2725
0.129743	1.2207	-2.4414	-4.8828	-1.2207
0.129843	-1.2207	1.2207	-5.4932	-3.0518
0.129943	2.4414	-1.8311	-6.1035	3.6621
0.130043	2.4414	0.61035	-4.8828	3.0518
0.130143	6.7139	7.9346	-8.5449	0
0.130243	6.7139	-3.0518	-1.8311	0.61035
0.130343	6.1035	5.4932	-10.986	0
0.130443	0	-6.7139	-3.0518	-1.8311
0.130544	0	-3.0518	-4.8828	-5.4932
0.130644	-7.3242	0	0	-4.8828
0.130744	9.1553	2.4414	-7.9346	3.0518
0.130844	5.4932	-4.8828	4.8828	-7.3242
0.130944	4.8828	-1.8311	3.6621	2.4414
0.131044	4.2725	-1.2207	-1.8311	0
0.131144	-0.61035	-6.1035	-6.7139	-0.61035
0.131244	6.1035	-3.0518	-1.8311	1.2207
0.131344	-2.4414	1.8311	-4.8828	1.2207
0.131444	1.8311	-3.6621	2.4414	2.4414
0.131544	3.0518	1.8311	-3.0518	0.61035
0.131644	7.9346	-4.8828	-1.2207	0
0.131744	-1.2207	1.2207	-9.1553	-6.7139
0.131844	-1.8311	6.1035	-3.0518	6.7139
0.131944	4.8828	2.4414	-2.4414	-3.6621
0.132044	5.4932	9.7656	-1.8311	-0.61035
0.132144	1.2207	3.0518	-4.8828	-9.1553
0.132244	-5.4932	4.2725	-4.2725	-0.61035
0.132344	1.8311	-1.8311	-1.2207	0
0.132444	3.6621	-3.0518	-4.8828	0
0.132544	-2.4414	2.4414	-3.0518	-2.4414
0.132644	1.8311	7.9346	-11.597	-0.61035
0.132744	-1.8311	0.61035	-10.376	4.8828
0.132844	3.0518	-0.61035	-5.4932	-3.0518
0.132944	7.3242	4.2725	-3.0518	0.61035
0.133044	4.8828	-0.61035	-5.4932	7.9346
0.133144	1.2207	-3.6621	1.8311	1.2207
0.133244	-4.2725	-3.0518	1.8311	1.8311
0.133344	-1.8311	1.8311	-3.6621	5.4932
0.133444	9.7656	0.61035	0.61035	-0.61035
0.133545	3.6621	6.1035	-8.5449	7.3242
0.133645	-3.0518	2.4414	-13.428	6.1035
0.133745	-1.2207	1.8311	-1.2207	4.8828
0.133845	-3.0518	-3.6621	4.8828	6.1035
0.133945	0.61035	-1.2207	-3.0518	9.1553
0.134045	-3.0518	-3.6621	-5.4932	8.5449
0.134145	-5.4932	4.2725	-3.6621	10.986
0.134245	-3.0518	0.61035	0.61035	3.0518
0.134345	-1.8311	0	-2.4414	4.2725
0.134445	6.7139	-1.2207	-3.0518	7.9346
0.134545	-4.8828	7.3242	-3.0518	4.2725
0.134645	-0.61035	6.1035	-1.8311	3.0518
0.134745	-6.7139	3.0518	-2.4414	2.4414
0.134845	5.4932	1.8311	-0.61035	-6.7139
0.134945	1.8311	4.8828	-2.4414	1.8311
0.135045	2.4414	1.2207	-4.2725	5.4932
0.135145	0.61035	3.0518	-8.5449	7.3242
0.135245	-3.0518	4.2725	-12.817	7.9346
0.135345	3.0518	-3.0518	-4.8828	0.61035
0.135445	-3.6621	0	-7.3242	1.2207
0.135545	0.61035	3.6621	-3.0518	3.0518
0.135645	-1.2207	0.61035	-4.8828	6.7139
0.135745	-4.8828	-0.61035	-3.6621	3.0518
0.135845	-8.5449	3.0518	4.2725	4.8828
0.135945	1.2207	0.61035	-10.376	-0.61035
0.136045	1.2207	-5.4932	-4.8828	-2.4414
0.136145	-1.2207	1.2207	-12.817	-1.2207
0.136245	-2.4414	-6.1035	-1.2207	-4.8828
0.136345	0.61035	10.986	3.6621	3.6621
0.136445	-4.8828	-4.2725	-4.2725	-0.61035
0.136546	2.4414	12.817	-10.376	7.9346
0.136646	-2.4414	3.0518	-4.8828	-2.4414
0.136746	3.6621	2.4414	-3.0518	7.3242
0.136846	1.8311	-4.2725	6.1035	3.6621
0.136946	0.61035	-0.61035	-4.2725	1.8311
0.137046	4.8828	1.2207	-6.1035	4.8828
0.137146	-0.61035	0.61035	7.3242	14.038
0.137246	-3.0518	4.2725	6.7139	0.61035
0.137346	0	1.2207	-3.6621	9.1553
0.137446	-3.0518	3.0518	-4.2725	4.2725
0.137546	-7.9346	-6.7139	3.0518	3.6621
0.137646	-3.6621	-0.61035	-3.6621	6.1035
0.137746	-6.1035	0.61035	-1.2207	6.1035
0.137846	4.8828	0.61035	3.6621	5.4932
0.137946	-5.4932	0.61035	0	4.8828
0.138046	0.61035	6.1035	1.2207	3.6621
0.138146	4.2725	-1.2207	-3.6621	6.7139
0.138246	0.61035	-4.2725	-0.61035	6.7139
0.138346	0	4.8828	4.2725	6.7139
0.138446	-3.6621	0	-6.7139	7.3242
0.138546	-1.8311	0.61035	-1.8311	7.3242
0.138646	-1.2207	0.61035	3.6621	11.597
0.138746	1.8311	0	-5.4932	6.7139
0.138846	0.61035	1.2207	-6.1035	12.207
0.138946	1.2207	-4.2725	0	11.597
0.139046	3.6621	-6.7139	-9.1553	1.2207
0.139146	3.0518	0.61035	1.2207	4.8828
0.139246	6.1035	2.4414	-4.2725	12.817
0.139346	-6.1035	3.0518	3.6621	16.479
0.139446	-2.4414	-1.2207	0.61035	1.2207
0.139547	1.2207	-0.61035	-1.2207	6.1035
0.139647	0.61035	-0.61035	3.6621	4.2725
0.139747	0	2.4414	3.6621	3.6621
0.139847	-2.4414	-2.4414	-1.8311	-2.4414
0.139947	3.6621	-6.1035	0.61035	0
0.140047	1.8311	4.8828	1.2207	5.4932
0.140147	-3.6621	-0.61035	-4.8828	7.3242
0.140247	-1.2207	-1.2207	5.4932	3.0518
0.140347	10.986	4.8828	1.2207	7.9346
0.140447	-1.8311	2.4414	-4.2725	1.2207
0.140547	3.0518	-3.0518	5.4932	1.2207
0.140647	1.8311	-0.61035	-2.4414	1.2207
0.140747	0	6.7139	9.1553	-1.2207
0.140847	-0.61035	4.2725	1.2207	0
0.140947	-2.4414	2.4414	2.4414	3.0518
0.141047	-5.4932	-0.61035	-7.3242	3.6621
0.141147	0	-4.8828	-9.1553	1.8311
0.141247	0	1.8311	3.0518	3.0518
0.141347	-3.0518	2.4414	1.8311	9.7656
0.141447	-1.2207	6.1035	3.0518	3.0518
0.141547	-0.61035	1.8311	9.1553	6.1035
0.141647	2.4414	2.4414	0.61035	3.0518
0.141747	3.6621	0	11.597	6.7139
0.141847	3.0518	3.6621	-1.2207	7.3242
0.141947	-3.0518	3.0518	-9.7656	7.9346
0.142047	1.8311	1.8311	-3.6621	6.1035
0.142147	3.6621	0.61035	1.2207	1.8311
0.142247	-3.6621	0	-8.5449	1.2207
0.142347	-0.61035	1.8311	-4.2725	-2.4414
0.142447	3.6621	-2.4414	-2.4414	3.0518
0.142548	1.2207	2.4414	-11.597	10.986
0.142648	-1.2207	1.2207	-4.2725	2.4414
0.142748	0.61035	-5.4932	-1.8311	-0.61035
0.142848	2.4414	-7.3242	3.0518	7.9346
0.142948	5.4932	1.2207	2.4414	2.4414
0.143048	-1.8311	-1.2207	4.8828	13.428
0.143148	-7.3242	3.0518	3.0518	4.8828
0.143248	-1.2207	4.8828	-6.1035	0
0.143348	-4.2725	-2.4414	0.61035	-2.4414
0.143448	1.2207	1.8311	1.2207	5.4932
0.143548	-3.0518	-0.61035	4.8828	-4.2725
0.143648	0	-6.1035	1.8311	-4.8828
0.143748	3.0518	8.5449	-1.8311	1.8311
0.143848	0	-4.2725	-2.4414	6.1035
0.143948	4.2725	-7.3242	-0.61035	1.2207
0.144048	-3.0518	0	-3.6621	0
0.144148	-1.2207	1.2207	-3.6621	-1.2207
0.144248	4.2725	-0.61035	3.6621	-2.4414
0.144348	-3.0518	4.2725	7.3242	0.61035
0.144448	-0.61035	0	0.61035	3.0518
0.144548	-5.4932	6.1035	3.0518	-1.2207
0.144648	-1.8311	3.0518	-0.61035	0
0.144748	-4.8828	-4.2725	3.0518	0
0.144848	2.4414	-3.0518	3.0518	-1.2207
0.144948	1.2207	-2.4414	-0.61035	2.4414
0.145048	-1.2207	-4.2725	5.4932	-0.61035
0.145148	-2.4414	-5.4932	-3.6621	-9.1553
0.145248	0	-3.0518	3.6621	-0.61035
0.145348	-1.2207	0.61035	-1.2207	2.4414
0.145448	3.0518	1.2207	-2.4414	0.61035
0.145549	1.8311	2.4414	-4.8828	-0.61035
0.145649	-2.4414	-10.376	-4.8828	5.4932
0.145749	0.61035	-3.6621	2.4414	3.6621
0.145849	-0.61035	2.4414	1.8311	5.4932
0.145949	3.0518	2.4414	1.8311	4.2725
0.146049	3.6621	3.0518	5.4932	0
0.146149	0.61035	0	2.4414	9.1553
0.146249	-3.6621	-5.4932	1.2207	4.2725
0.146349	3.0518	-1.8311	-0.61035	4.8828
0.146449	3.0518	-6.7139	4.2725	6.1035
0.146549	3.6621	6.1035	-5.4932	13.428
0.146649	-0.61035	-0.61035	-3.0518	7.3242
0.146749	5.4932	4.2725	1.2207	5.4932
0.146849	-0.61035	3.6621	-5.4932	12.207
0.146949	7.3242	6.7139	-1.2207	4.2725
0.147049	-1.2207	6.1035	-5.4932	10.376
0.147149	-1.2207	-5.4932	-0.61035	3.0518
0.147249	0	-4.8828	-1.2207	13.428
0.147349	0	0.61035	-0.61035	-1.2207
0.147449	-4.8828	0	-1.2207	2.4414
0.147549	2.4414	6.1035	1.8311	-1.2207
0.147649	0.61035	-0.61035	3.0518	-3.0518
0.147749	0	2.4414	2.4414	-2.4414
0.147849	0.61035	0	0.61035	4.8828
0.147949	6.7139	1.2207	-4.8828	6.1035
0.148049	-5.4932	2.4414	-6.1035	0
0.148149	-0.61035	0	-1.8311	-1.8311
0.148249	-0.61035	0	2.4414	0.61035
0.148349	1.8311	-2.4414	6.1035	8.5449
0.148449	3.6621	-1.8311	-4.2725	6.1035
0.14855	3.0518	0	-7.3242	0.61035
0.14865	4.2725	6.1035	-1.2207	12.207
0.14875	8.5449	0.61035	-4.8828	11.597
0.14885	-6.1035	3.6621	-4.2725	4.8828
0.14895	0	3.0518	1.8311	4.8828
0.14905	-3.0518	3.6621	6.1035	1.2207
0.14915	1.8311	-0.61035	6.1035	-1.8311
0.14925	1.2207	0.61035	0.61035	-4.8828
0.14935	0.61035	2.4414	-3.0518	-3.0518
0.14945	-2.4414	-5.4932	-3.6621	-3.6621
0.14955	-3.0518	-4.8828	-8.5449	-4.8828
0.14965	-6.7139	3.0518	-1.2207	-5.4932
0.14975	3.0518	2.4414	-3.0518	-3.0518
0.14985	-4.2725	0.61035	0.61035	-3.6621
0.14995	4.8828	1.8311	-6.1035	-3.6621
0.15005	-0.61035	6.7139	-0.61035	0.61035
0.15015	-4.8828	-3.6621	-1.8311	-4.8828
0.15025	1.8311	4.2725	-6.7139	-3.0518
0.15035	-1.8311	-1.2207	-1.8311	-1.2207
0.15045	3.0518	2.4414	0.61035	-1.2207
0.15055	2.4414	-1.2207	6.7139	-3.0518
0.15065	4.8828	-1.2207	-0.61035	-0.61035
0.15075	1.2207	-2.4414	-1.8311	-5.4932
0.15085	-2.4414	-0.61035	1.2207	-0.61035
0.15095	1.8311	-3.0518	-1.8311	-5.4932
0.15105	-3.0518	6.1035	-1.8311	-3.6621
0.15115	-4.8828	4.2725	-1.2207	-6.1035
0.15125	1.2207	-9.7656	-5.4932	-7.3242
0.15135	-3.6621	-7.3242	-1.8311	-4.2725
0.15145	-5.4932	1.8311	-4.8828	-4.8828
0.151551	2.4414	-3.0518	-6.7139	-3.0518
0.151651	-1.8311	0.61035	-6.1035	1.2207
0.151751	1.2207	3.0518	-4.8828	-4.8828
0.151851	-6.1035	-1.2207	-4.2725	-1.2207
0.151951	1.2207	1.2207	-4.8828	-1.2207
0.152051	-0.61035	-1.8311	-8.5449	3.0518
0.152151	6.1035	-5.4932	-1.2207	-1.8311
0.152251	3.6621	-6.7139	3.0518	0
0.152351	0	4.2725	-1.2207	0
0.152451	2.4414	-1.2207	1.2207	-1.8311
0.152551	-3.6621	2.4414	1.8311	3.6621
0.152651	6.7139	4.2725	-0.61035	-7.3242
0.152751	-4.2725	4.8828	1.8311	-4.2725
0.152851	1.2207	-2.4414	0.61035	-7.9346
0.152951	-1.2207	3.6621	-1.8311	-7.9346
0.153051	1.2207	4.2725	-2.4414	-6.1035
0.153151	-0.61035	-3.6621	0.61035	-1.2207
0.153251	0.61035	0.61035	-1.8311	3.0518
0.153351	1.2207	1.8311	-3.0518	-0.61035
0.153451	2.4414	1.8311	1.2207	-3.0518
0.153551	1.2207	9.1553	4.8828	0.61035
0.153651	0	-3.6621	1.8311	3.0518
0.153751	0.61035	6.1035	-3.0518	-0.61035
0.153851	4.8828	3.6621	-8.5449	6.7139
0.153951	1.8311	0	0.61035	10.376
0.154051	1.8311	-4.2725	3.6621	-10.376
0.154151	-1.2207	-1.8311	-0.61035	-0.61035
0.154251	3.6621	-2.4414	-3.0518	0
0.154351	1.8311	-1.8311	4.2725	3.6621
0.154451	3.0518	4.8828	7.3242	0.61035
0.154552	3.0518	0.61035	12.207	-1.8311
0.154652	1.8311	3.0518	5.4932	1.8311
0.154752	0	-3.0518	7.3242	0
0.154852	-3.6621	1.8311	4.2725	4.8828
0.154952	-4.8828	8.5449	-0.61035	6.1035
0.155052	1.2207	-2.4414	1.2207	3.0518
0.155152	-3.6621	-3.0518	7.3242	6.7139
0.155252	-6.7139	5.4932	-1.8311	3.6621
0.155352	0	-5.4932	0.61035	0
0.155452	3.0518	3.0518	-1.2207	6.7139
0.155552	-4.8828	-1.8311	0.61035	4.2725
0.155652	-2.4414	-3.0518	-1.2207	-0.61035
0.155752	-1.8311	-1.2207	1.2207	6.1035
0.155852	-4.2725	1.2207	0	-4.2725
0.155952	7.3242	-1.2207	-1.8311	-1.2207
0.156052	-1.2207	-1.2207	2.4414	4.8828
0.156152	-0.61035	0.61035	5.4932	0
0.156252	4.8828	1.8311	8.5449	1.8311
0.156352	1.8311	-3.0518	7.3242	-2.4414
0.156452	4.8828	-6.1035	1.8311	0
0.156552	1.2207	-0.61035	9.7656	-3.6621
0.156652	-1.8311	12.207	-3.0518	0
0.156752	0.61035	-3.0518	-0.61035	-3.6621
0.156852	1.2207	-12.817	-1.8311	-1.2207
0.156952	1.2207	6.7139	7.3242	2.4414
0.157052	-6.7139	6.1035	0	10.376
0.157152	0.61035	-0.61035	4.8828	4.8828
0.157252	1.2207	-0.61035	0.61035	0
0.157352	-0.61035	1.8311	0.61035	1.2207
0.157452	3.6621	-7.3242	1.2207	5.4932
0.157553	-0.61035	-1.8311	3.0518	-1.2207
0.157653	1.8311	-6.1035	-4.2725	-1.2207
0.157753	1.8311	-3.6621	7.9346	-1.2207
0.157853	5.4932	-1.8311	6.1035	3.0518
0.157953	-1.2207	-6.1035	-4.2725	-7.9346
0.158053	-3.6621	-2.4414	3.0518	2.4414
0.158153	0	-2.4414	-5.4932	0.61035
0.158253	-0.61035	4.2725	0	-2.4414
0.158353	-1.2207	-1.8311	-4.8828	-1.8311
0.158453	-4.8828	-2.4414	3.6621	-7.9346
0.158553	0.61035	-8.5449	4.2725	-1.8311
0.158653	1.2207	0.61035	-5.4932	-2.4414
0.158753	1.2207	0	4.8828	-2.4414
0.158853	2.4414	-3.0518	3.6621	0
0.158953	-4.8828	-5.4932	3.0518	2.4414
0.159053	1.2207	-2.4414	7.3242	0.61035
0.159153	4.8828	-1.2207	-2.4414	0.61035
0.159253	6.7139	-0.61035	2.4414	0.61035
0.159353	-3.6621	4.8828	-5.4932	0.61035
0.159453	-0.61035	-5.4932	1.2207	-1.8311
0.159553	1.2207	-1.8311	0	-4.2725
0.159653	3.0518	-1.8311	6.1035	1.8311
0.159753	4.8828	-0.61035	-5.4932	-4.8828
0.159853	0	0.61035	3.0518	-4.2725
0.159953	-2.4414	3.6621	-1.2207	-5.4932
0.160053	-4.2725	1.2207	2.4414	-6.7139
0.160153	-2.4414	0.61035	10.986	1.8311
0.160253	-0.61035	-3.0518	7.3242	1.2207
0.160353	1.2207	1.2207	3.6621	-1.2207
0.160453	1.2207	1.2207	9.1553	-1.8311
0.160554	3.0518	1.8311	-0.61035	-4.2725
0.160654	0	-0.61035	-4.2725	-2.4414
0.160754	3.0518	0	-3.6621	3.0518
0.160854	11.597	4.2725	7.3242	0.61035
0.160954	1.2207	1.2207	6.1035	0
0.161054	6.1035	-3.0518	5.4932	1.8311
0.161154	0.61035	3.0518	5.4932	1.8311
0.161254	-3.6621	1.8311	0	6.1035
0.161354	7.9346	-7.3242	-4.8828	1.2207
0.161454	3.6621	0.61035	-4.8828	-4.2725
0.161554	-4.8828	6.1035	0	-7.9346
0.161654	1.8311	-1.2207	5.4932	-3.0518
0.161754	-4.2725	7.9346	7.3242	0
0.161854	-1.8311	2.4414	7.3242	0
0.161954	-2.4414	3.0518	8.5449	1.2207
0.162054	-5.4932	-3.6621	4.8828	-5.4932
0.162154	1.8311	-1.2207	6.7139	-3.6621
0.162254	-1.8311	3.0518	-0.61035	1.8311
0.162354	-2.4414	-5.4932	1.2207	-1.8311
0.162454	2.4414	3.6621	1.2207	-1.8311
0.162554	0.61035	1.2207	4.8828	-5.4932
0.162654	-1.2207	-4.2725	3.0518	-3.0518
0.162754	2.4414	6.1035	7.3242	1.2207
0.162854	3.6621	0.61035	3.0518	-1.2207
0.162954	1.8311	8.5449	6.1035	-0.61035
0.163054	3.0518	-2.4414	6.7139	-6.7139
0.163154	-3.0518	1.8311	1.8311	-5.4932
0.163254	5.4932	-3.6621	-3.6621	2.4414
0.163354	1.8311	-1.2207	8.5449	-3.0518
0.163454	2.4414	3.6621	9.7656	-3.0518
0.163555	-3.0518	4.2725	1.8311	-1.2207
0.163655	-1.8311	-1.2207	6.1035	-1.2207
0.163755	-3.0518	-1.2207	2.4414	5.4932
0.163855	-1.8311	2.4414	1.2207	3.0518
0.163955	-0.61035	-1.2207	-0.61035	-2.4414
0.164055	4.2725	-2.4414	-3.6621	-0.61035
0.164155	-5.4932	3.6621	-4.2725	-1.8311
0.164255	-9.1553	2.4414	0	-1.2207
0.164355	-7.9346	3.0518	-3.0518	6.1035
0.164455	3.6621	1.2207	-3.6621	1.2207
0.164555	0	4.2725	7.9346	-4.8828
0.164655	-3.0518	2.4414	-2.4414	-5.4932
0.164755	4.8828	-0.61035	-4.8828	-1.8311
0.164855	3.6621	3.0518	-5.4932	-10.986
0.164955	-3.0518	4.8828	4.8828	-7.3242
0.165055	-9.1553	-1.2207	1.2207	-9.1553
0.165155	2.4414	-6.7139	-4.2725	-4.2725
0.165255	-7.9346	-3.6621	-1.8311	-7.3242
0.165355	-4.2725	1.8311	-1.8311	-4.8828
0.165455	6.7139	3.6621	3.6621	-4.2725
0.165555	-3.6621	6.1035	-1.8311	4.2725
0.165655	0	4.8828	-1.2207	-6.1035
0.165755	2.4414	3.6621	-9.1553	-3.6621
0.165855	1.2207	7.9346	-7.9346	2.4414
0.165955	8.5449	-4.8828	-3.6621	0
0.166055	-1.8311	-3.0518	4.2725	0.61035
0.166155	-0.61035	-3.6621	6.1035	-6.1035
0.166255	-1.8311	-1.8311	2.4414	-3.0518
0.166355	4.8828	-4.8828	-4.2725	-5.4932
0.166455	-1.8311	0	-14.038	-1.2207
0.166556	0	-1.2207	4.8828	-2.4414
0.166656	-2.4414	-3.0518	-7.3242	0
0.166756	-1.2207	0	-10.376	-3.0518
0.166856	-2.4414	-2.4414	-5.4932	-9.7656
0.166956	2.4414	3.6621	-3.6621	-1.2207
0.167056	-1.2207	-3.0518	-3.6621	-4.8828
0.167156	-3.6621	3.0518	-3.0518	0
0.167256	-2.4414	4.8828	-7.3242	2.4414
0.167356	0.61035	-1.8311	-4.8828	-1.2207
0.167456	1.2207	2.4414	-3.6621	0
0.167556	1.2207	1.2207	-10.986	1.8311
0.167656	1.8311	-3.0518	-2.4414	1.2207
0.167756	4.8828	1.2207	-6.7139	-7.9346
0.167856	-2.4414	7.9346	-3.0518	-1.8311
0.167956	2.4414	2.4414	-1.2207	3.0518
0.168056	0	2.4414	-3.0518	-4.2725
0.168156	-3.0518	2.4414	-1.2207	-0.61035
0.168256	-2.4414	2.4414	-1.8311	6.1035
0.168356	-3.0518	-0.61035	-5.4932	0.61035
0.168456	2.4414	3.0518	-3.6621	-1.8311
0.168556	-2.4414	-3.0518	5.4932	0
0.168656	-1.8311	4.2725	2.4414	-3.0518
0.168756	-4.2725	-4.8828	7.3242	-0.61035
0.168856	-1.8311	2.4414	-5.4932	-1.2207
0.168956	0.61035	-9.1553	-4.8828	-2.4414
0.169056	0	-3.0518	-6.1035	0
0.169156	2.4414	1.2207	-5.4932	0.61035
0.169256	-2.4414	0.61035	-3.6621	1.8311
0.169356	3.6621	2.4414	3.6621	0
0.169456	-0.61035	-3.6621	-3.6621	2.4414
0.169557	7.9346	6.1035	4.2725	3.6621
0.169657	1.8311	1.8311	-3.6621	-1.2207
0.169757	3.6621	4.2725	1.8311	5.4932
0.169857	1.8311	-2.4414	0.61035	-5.4932
0.169957	-6.1035	2.4414	-1.2207	4.8828
0.170057	4.2725	2.4414	7.3242	3.6621
0.170157	0.61035	6.1035	11.597	3.6621
0.170257	-1.8311	0	3.6621	8.5449
0.170357	-3.0518	-2.4414	1.8311	3.6621
0.170457	1.2207	6.1035	4.2725	9.1553
0.170557	-6.7139	0	7.3242	3.6621
0.170657	3.0518	-1.2207	5.4932	-0.61035
0.170757	-4.2725	-5.4932	-0.61035	6.1035
0.170857	1.2207	0	-1.8311	0
0.170957	1.8311	-1.8311	3.6621	4.2725
0.171057	0.61035	4.8828	-4.2725	-3.0518
0.171157	7.3242	4.2725	-6.1035	-3.0518
0.171257	-1.8311	-3.0518	5.4932	4.2725
0.171357	1.8311	5.4932	6.7139	1.2207
0.171457	-3.6621	0	1.2207	-3.0518
0.171557	2.4414	0.61035	1.8311	-0.61035
0.171657	0.61035	-6.1035	6.1035	-1.8311
0.171757	-6.1035	-3.0518	-2.4414	0
0.171857	-0.61035	-1.8311	4.2725	-0.61035
0.171957	1.8311	-1.2207	7.3242	0.61035
0.172057	3.6621	1.2207	0	-3.6621
0.172157	-3.0518	4.8828	1.2207	-0.61035
0.172257	1.2207	-2.4414	5.4932	-3.6621
0.172357	-0.61035	1.8311	3.6621	1.8311
0.172457	4.8828	0	8.5449	-6.7139
0.172558	-0.61035	6.1035	10.376	4.8828
0.172658	-1.2207	-6.7139	16.479	-0.61035
0.172758	-1.8311	-3.0518	6.1035	1.8311
0.172858	-7.3242	-2.4414	14.648	-0.61035
0.172958	0	-4.8828	12.817	5.4932
0.173058	1.8311	0	7.3242	0
0.173158	-1.2207	-1.8311	4.2725	5.4932
0.173258	-5.4932	3.0518	4.2725	1.8311
0.173358	0	-0.61035	2.4414	-0.61035
0.173458	0	-1.2207	8.5449	8.5449
0.173558	0.61035	-6.7139	7.3242	6.1035
0.173658	-11.597	-9.7656	5.4932	4.2725
0.173758	-4.2725	-3.6621	9.1553	-3.6621
0.173858	5.4932	-3.0518	5.4932	2.4414
0.173958	1.2207	0.61035	2.4414	1.2207
0.174058	1.8311	0.61035	-1.2207	10.986
0.174158	5.4932	3.6621	-3.6621	-1.8311
0.174258	-0.61035	6.1035	2.4414	0
0.174358	-4.2725	2.4414	0.61035	3.0518
0.174458	0.61035	6.1035	4.8828	-1.2207
0.174558	3.6621	-0.61035	3.6621	9.1553
0.174658	-0.61035	2.4414	-4.8828	-0.61035
0.174758	0.61035	2.4414	7.3242	3.0518
0.174858	-1.8311	2.4414	2.4414	-2.4414
0.174958	-2.4414	-1.2207	2.4414	0.61035
0.175058	6.1035	-2.4414	4.8828	0.61035
0.175158	-2.4414	0	1.2207	1.8311
0.175258	4.8828	3.0518	0.61035	3.0518
0.175358	4.2725	3.0518	-2.4414	3.0518
0.175458	-3.6621	-4.2725	0.61035	-3.6621
0.175559	-0.61035	-5.4932	2.4414	3.0518
0.175659	0.61035	-2.4414	5.4932	3.0518
0.175759	3.6621	-1.2207	5.4932	6.1035
0.175859	-6.7139	-1.2207	4.2725	-3.0518
0.175959	-1.8311	-7.9346	4.8828	0
0.176059	-1.8311	-1.2207	2.4414	4.2725
0.176159	-1.2207	3.0518	0	12.817
0.176259	0.61035	-4.2725	-1.2207	-0.61035
0.176359	2.4414	3.0518	-1.8311	0
0.176459	0	-1.8311	-8.5449	-1.8311
0.176559	-6.7139	-0.61035	0.61035	5.4932
0.176659	4.8828	-2.4414	-4.8828	7.3242
0.176759	8.5449	-7.3242	-8.5449	-1.8311
0.176859	3.6621	-0.61035	-1.2207	7.9346
0.176959	-1.2207	10.376	-0.61035	0
0.177059	-4.2725	4.2725	4.8828	6.1035
0.177159	-2.4414	-3.6621	-1.2207	9.1553
0.177259	-1.2207	3.0518	0.61035	-0.61035
0.177359	-0.61035	0.61035	5.4932	-0.61035
0.177459	-1.2207	-0.61035	1.2207	-6.7139
0.177559	6.1035	-2.4414	2.4414	0
0.177659	-1.8311	0.61035	0.61035	1.2207
0.177759	5.4932	-2.4414	-4.2725	-2.4414
0.177859	4.8828	-0.61035	-0.61035	2.4414
0.177959	-5.4932	-3.6621	5.4932	0
0.178059	5.4932	-11.597	2.4414	6.7139
0.178159	-1.2207	-3.0518	1.2207	6.1035
0.178259	-4.8828	-5.4932	4.2725	3.6621
0.178359	-1.2207	4.2725	7.9346	5.4932
0.178459	-3.6621	-4.8828	4.8828	11.597
0.17856	3.6621	-0.61035	5.4932	9.7656
0.17866	-0.61035	1.8311	3.0518	4.8828
0.17876	6.1035	-3.0518	4.2725	3.0518
0.17886	-0.61035	2.4414	-2.4414	7.9346
0.17896	1.8311	7.3242	-4.2725	7.9346
0.17906	-6.1035	0.61035	7.3242	4.8828
0.17916	1.8311	3.0518	1.2207	4.2725
0.17926	-3.0518	-3.6621	4.8828	7.9346
0.17936	3.0518	3.6621	1.8311	-1.2207
0.17946	-0.61035	3.0518	0.61035	8.5449
0.17956	-3.6621	4.8828	-3.6621	4.8828
0.17966	-1.8311	1.2207	3.0518	5.4932
0.17976	6.7139	-1.8311	1.2207	9.1553
0.17986	-3.0518	-1.2207	-1.2207	4.8828
0.17996	5.4932	-0.61035	0	6.1035
0.18006	1.8311	-1.2207	2.4414	3.6621
0.18016	5.4932	-0.61035	5.4932	5.4932
0.18026	0.61035	-6.7139	2.4414	6.1035
0.18036	0	0	0	9.7656
0.18046	-3.0518	3.6621	2.4414	1.8311
0.18056	3.6621	-0.61035	2.4414	3.6621
0.18066	-3.6621	-3.0518	-0.61035	-1.2207
0.18076	4.8828	3.0518	6.7139	6.7139
0.18086	5.4932	-1.2207	2.4414	5.4932
0.18096	2.4414	-2.4414	3.6621	15.869
0.18106	-1.8311	-4.8828	0.61035	0.61035
0.18116	-0.61035	-2.4414	0	3.6621
0.18126	1.2207	-6.1035	-1.8311	8.5449
0.18136	3.0518	-1.2207	4.8828	7.3242
0.18146	-4.8828	0	7.9346	6.1035
0.181561	-1.8311	-1.8311	-2.4414	9.7656
0.181661	0.61035	-3.0518	9.7656	-2.4414
0.181761	-1.2207	2.4414	-3.6621	0
0.181861	9.1553	6.1035	7.3242	3.6621
0.181961	-2.4414	-5.4932	6.1035	6.7139
0.182061	5.4932	-1.8311	-3.0518	5.4932
0.182161	2.4414	0	2.4414	4.8828
0.182261	4.2725	-5.4932	2.4414	-3.0518
0.182361	3.6621	2.4414	2.4414	4.2725
0.182461	-6.1035	3.0518	-0.61035	6.1035
0.182561	6.7139	3.0518	10.986	0.61035
0.182661	-8.5449	0	-2.4414	4.8828
0.182761	3.6621	-4.2725	-1.2207	1.8311
0.182861	4.8828	4.2725	-6.7139	5.4932
0.182961	3.6621	0.61035	-3.6621	1.2207
0.183061	1.8311	4.2725	-1.8311	4.8828
0.183161	3.0518	1.2207	-7.9346	0
0.183261	2.4414	-0.61035	-3.6621	-0.61035
0.183361	0	1.2207	0	2.4414
0.183461	2.4414	0.61035	0	4.2725
0.183561	-6.7139	1.8311	-0.61035	-3.0518
0.183661	4.2725	-1.2207	-0.61035	-0.61035
0.183761	6.1035	4.2725	-4.2725	4.8828
0.183861	5.4932	0	1.2207	2.4414
0.183961	6.7139	1.2207	1.8311	2.4414
0.184061	1.2207	3.0518	1.2207	0.61035
0.184161	-1.2207	-2.4414	-9.1553	-4.8828
0.184261	-0.61035	3.0518	-4.2725	1.2207
0.184361	0.61035	-6.7139	-4.8828	0.61035
0.184461	0	0	-4.2725	1.8311
0.184562	-7.9346	3.6621	-10.986	4.8828
0.184662	-4.2725	6.7139	-4.2725	4.8828
0.184762	-1.8311	1.8311	-4.8828	9.1553
0.184862	2.4414	2.4414	-4.8828	5.4932
0.184962	-3.0518	2.4414	-7.3242	12.817
0.185062	-1.2207	-3.0518	-2.4414	12.207
0.185162	-3.6621	7.3242	-3.0518	10.376
0.185262	-1.8311	-1.2207	4.8828	9.1553
0.185362	7.3242	0	8.5449	19.531
0.185462	-3.6621	3.0518	0.61035	10.986
0.185562	3.0518	-0.61035	3.6621	-3.0518
0.185662	9.7656	3.6621	-3.6621	4.2725
0.185762	1.8311	-3.0518	4.2725	-0.61035
0.185862	0	1.8311	7.3242	12.207
0.185962	2.4414	-3.6621	6.1035	4.2725
0.186062	1.2207	1.2207	4.2725	-1.2207
0.186162	-0.61035	0	4.2725	3.6621
0.186262	-8.5449	-3.0518	4.2725	0.61035
0.186362	-7.3242	4.8828	10.986	-1.8311
0.186462	-1.8311	8.5449	7.9346	3.6621
0.186562	1.2207	-0.61035	6.7139	8.5449
0.186662	0.61035	1.2207	7.3242	2.4414
0.186762	-2.4414	5.4932	-3.0518	1.8311
0.186862	-3.6621	0	6.1035	11.597
0.186962	3.0518	4.8828	3.6621	6.7139
0.187062	1.2207	0.61035	4.8828	0.61035
0.187162	3.0518	1.2207	1.8311	3.0518
0.187262	-4.8828	1.2207	-4.2725	3.0518
0.187362	6.1035	1.2207	5.4932	5.4932
0.187462	1.8311	10.376	0.61035	5.4932
0.187563	-4.2725	2.4414	7.3242	-4.8828
0.187663	1.8311	-0.61035	-3.6621	6.1035
0.187763	-4.2725	4.8828	-0.61035	1.8311
0.187863	1.8311	2.4414	3.0518	-0.61035
0.187963	-4.2725	-3.6621	-3.6621	-4.8828
0.188063	-8.5449	-2.4414	-1.2207	0.61035
0.188163	-1.8311	4.8828	0.61035	0
0.188263	-3.0518	1.8311	2.4414	1.2207
0.188363	0.61035	-2.4414	1.2207	3.0518
0.188463	0.61035	-1.8311	-0.61035	4.8828
0.188563	-1.2207	-9.1553	2.4414	7.3242
0.188663	-1.8311	-3.6621	-1.2207	6.1035
0.188763	4.8828	1.8311	-7.9346	12.817
0.188863	-5.4932	0.61035	6.7139	2.4414
0.188963	1.2207	1.2207	-4.2725	3.6621
0.189063	4.2725	1.8311	-3.6621	6.7139
0.189163	4.2725	4.2725	-3.6621	3.6621
0.189263	1.8311	-1.2207	-1.2207	10.986
0.189363	-1.2207	1.8311	-3.6621	11.597
0.189463	-1.2207	-1.8311	2.4414	1.8311
0.189563	5.4932	-2.4414	1.8311	4.2725
0.189663	0.61035	3.6621	-4.8828	3.0518
0.189763	-1.8311	-1.2207	7.9346	4.2725
0.189863	2.4414	1.8311	2.4414	0
0.189963	1.8311	0.61035	0.61035	4.8828
0.190063	0	-2.4414	-1.8311	3.6621
0.190163	-0.61035	7.3242	-4.2725	9.1553
0.190263	1.8311	3.0518	1.2207	1.8311
0.190363	6.1035	1.2207	3.6621	9.7656
0.190463	-2.4414	1.2207	0.61035	1.8311
0.190564	0.61035	-1.8311	-2.4414	0
0.190664	0	-3.0518	3.6621	2.4414
0.190764	-4.8828	-6.1035	3.0518	0.61035
0.190864	-0.61035	0	4.2725	-2.4414
0.190964	-1.8311	3.0518	11.597	10.376
0.191064	6.7139	4.8828	0	4.2725
0.191164	-1.2207	0	-1.8311	7.3242
0.191264	-3.0518	1.8311	-4.2725	-5.4932
0.191364	0.61035	6.1035	-1.8311	12.207
0.191464	-5.4932	1.8311	6.7139	3.6621
0.191564	-8.5449	-1.2207	-3.0518	3.6621
0.191664	-2.4414	1.2207	2.4414	-2.4414
0.191764	3.0518	0	1.8311	3.6621
0.191864	-1.2207	0.61035	-1.8311	-0.61035
0.191964	-3.0518	3.6621	-2.4414	0
0.192064	-3.0518	1.2207	3.0518	-0.61035
0.192164	-1.8311	0	-4.2725	-0.61035
0.192264	-1.8311	-4.8828	0.61035	1.8311
0.192364	-1.2207	0.61035	-0.61035	0.61035
0.192464	7.9346	4.8828	-4.8828	2.4414
0.192564	2.4414	0	1.2207	2.4414
0.192664	1.8311	7.9346	2.4414	5.4932
0.192764	-0.61035	-0.61035	-4.2725	8.5449
0.192864	-1.8311	2.4414	-2.4414	4.8828
0.192964	5.4932	-3.0518	4.8828	3.0518
0.193064	3.0518	-1.2207	3.6621	1.8311
0.193164	0.61035	-1.2207	-4.2725	-1.2207
0.193264	-3.0518	-3.0518	0	-0.61035
0.193364	-4.2725	1.2207	-2.4414	4.8828
0.193464	4.8828	1.2207	6.1035	7.3242
0.193565	-8.5449	0.61035	7.3242	5.4932
0.193665	-3.6621	1.2207	1.8311	4.8828
0.193765	1.8311	3.6621	3.6621	4.8828
0.193865	-4.8828	-1.2207	-3.6621	9.7656
0.193965	-7.3242	2.4414	0	7.3242
0.194065	3.6621	6.1035	6.7139	4.8828
0.194165	7.3242	6.1035	7.3242	3.6621
0.194265	-1.2207	-0.61035	-1.8311	3.6621
0.194365	-4.8828	0	3.6621	6.7139
0.194465	-3.0518	-4.2725	-4.8828	1.8311
0.194565	1.2207	7.3242	-0.61035	12.207
0.194665	-2.4414	-3.6621	1.2207	-1.8311
0.194765	-1.8311	3.6621	3.0518	6.7139
0.194865	-6.7139	9.7656	7.9346	5.4932
0.194965	-4.8828	-3.6621	2.4414	4.8828
0.195065	-6.7139	-1.8311	5.4932	7.3242
0.195165	-4.2725	-4.8828	-1.2207	1.8311
0.195265	-6.7139	0.61035	5.4932	7.3242
0.195365	0	-1.8311	1.8311	6.1035
0.195465	-4.2725	-3.0518	-3.0518	1.2207
0.195565	7.9346	1.8311	-0.61035	4.2725
0.195665	-3.0518	1.2207	-4.2725	5.4932
0.195765	-4.8828	-6.1035	-3.6621	4.8828
0.195865	-0.61035	3.6621	1.8311	9.7656
0.195965	-6.7139	-0.61035	-5.4932	6.7139
0.196065	1.8311	0	1.8311	5.4932
0.196165	1.2207	0.61035	-5.4932	5.4932
0.196265	6.1035	4.2725	-1.8311	9.7656
0.196365	-6.1035	7.3242	3.0518	4.2725
0.196465	-1.8311	-4.2725	-4.2725	5.4932
0.196566	0.61035	0	3.0518	4.2725
0.196666	1.8311	0	3.6621	1.8311
0.196766	-3.0518	-1.8311	1.2207	-1.8311
0.196866	-1.2207	-2.4414	-3.0518	1.2207
0.196966	3.0518	6.1035	6.7139	4.2725
0.197066	-4.2725	-1.2207	1.2207	4.2725
0.197166	1.8311	-6.7139	1.8311	3.6621
0.197266	1.8311	0	-0.61035	9.7656
0.197366	-1.2207	-1.2207	3.6621	9.1553
0.197466	-1.2207	3.0518	-3.0518	7.9346
0.197566	-0.61035	1.8311	-4.8828	9.1553
0.197666	3.6621	-4.2725	-6.7139	6.7139
0.197766	1.8311	9.7656	2.4414	10.376
0.197866	-3.6621	-2.4414	-1.2207	5.4932
0.197966	6.7139	-0.61035	2.4414	14.648
0.198066	2.4414	4.2725	-3.0518	9.7656
0.198166	1.2207	4.8828	4.2725	7.9346
0.198266	-1.2207	-1.2207	9.1553	3.0518
0.198366	3.6621	-3.0518	-0.61035	6.1035
0.198466	-3.6621	-2.4414	-4.2725	5.4932
0.198566	3.6621	4.2725	-4.8828	6.7139
0.198666	1.8311	4.2725	-0.61035	10.986
0.198766	0	2.4414	-1.2207	6.1035
0.198866	-1.2207	0.61035	-6.1035	1.8311
0.198966	2.4414	-6.7139	4.2725	10.376
0.199066	3.6621	-0.61035	3.6621	3.6621
0.199166	0	0.61035	-4.8828	7.9346
0.199266	-1.8311	4.2725	-4.2725	-0.61035
0.199366	3.6621	0	-8.5449	3.0518
0.199466	-0.61035	-4.8828	-3.0518	11.597
0.199567	4.8828	-8.5449	-6.7139	0.61035
0.199667	-7.3242	-4.8828	-4.8828	6.7139
[truncated: 27,994 more rows]

## Sheet: Figure 8C-D
ROI Positions		Color Map Data		ROI 1 Calcium Imaging (∆F/F)																				ROI 2 Calcium Imaging (∆F/F)
X	Y	DSI			Trial 1		Trial2		Trial 3		Trial 4		Trial 5		Trial 6		Trial 7		Trial 8		Average				Trial 1		Trial2		Trial 3		Trial 4		Trial 5		Trial 6		Trial 7		Trial 8		Average
-0.00151269	-0.00119212	0.203492		Time	PD	ND	PD	ND	PD	ND	PD	ND	PD	ND	PD	ND	PD	ND	PD	ND	PD	ND		Time	PD	ND	PD	ND	PD	ND	PD	ND	PD	ND	PD	ND	PD	ND	PD	ND	PD	ND
-0.00151288	-0.00118783	0.242995		-0.0010901	-0.149304	0.224082	0.146186	0.0471232	0.298687	-0.0934325	0.0305207	0.735538	0.0815577	-0.321348	0.13713	-0.0144445	-0.127179	0.0159213	-0.300937	0.0539749	0.0145826	0.0809268			-0.0330928	0.00139387	0.0587715	0.236405	-0.0644122	-0.102248	-0.290626	-0.0675573	-0.143373	0.0792186	-0.00840056	-0.169532	0.146755	-0.230758	0.379466	-0.153529	0.00563594	-0.0508258
-0.0015084	-0.00119305	0.186213		0.0422299	-0.13565	0.209942	0.0659058	0.0620549	0.308158	-0.202492	-0.0442236	0.770852	0.0191729	-0.211427	0.102029	-0.0496827	-0.0913653	-0.0196032	-0.177404	0.0171245	0.00582777	0.0720961			-0.0351885	0.0827703	0.0351314	0.249862	-0.0342807	-0.051064	-0.300517	-0.0685976	-0.183707	0.150177	-0.00255323	-0.149539	0.165073	-0.28607	0.302418	-0.14066	-0.00670299	-0.0266401
-0.0015029	-0.00120264	0.228627		0.0855499	-0.0590341	0.209883	0.0228267	0.0160755	0.252746	-0.134777	-0.0549538	0.733434	-0.0301205	-0.137009	0.132808	-0.155213	-0.0663372	-0.0368889	-0.183237	-0.00848694	0.00183718	0.0608772			-0.0107343	0.184527	0.0106469	0.257066	-0.0420242	-0.0572684	-0.291844	-0.0624985	-0.184791	0.177389	0.029713	-0.0923929	0.175058	-0.173565	0.26169	-0.144312	-0.00653569	0.0111181
-0.00150417	-0.00119842	0.23584		0.12887	0.0470559	0.160728	-0.025309	-0.0602688	0.245222	-0.0690695	-0.159243	0.665644	-0.15463	-0.069696	0.0391595	-0.175536	-0.0456786	-0.05114	-0.220749	0.0192244	-0.0342716	0.0524858			0.0381349	0.189596	-0.00100354	0.184005	-0.0150414	-0.0141307	-0.270738	-0.0176125	-0.170396	0.183527	0.0385437	-0.0960093	0.0742398	-0.121608	0.235919	-0.142685	-0.00879261	0.0206353
-0.00150417	-0.00119419	0.221094		0.17219	0.10256	0.20749	-0.00359227	-0.00545851	0.226369	-0.055362	-0.212363	0.548036	-0.0611567	0.00801236	-0.000869586	-0.0464497	-0.0568348	-0.165459	-0.304725	-0.0327496	-0.0388265	0.0572576			-0.0283131	0.235426	0.00253267	0.135636	0.0369973	0.0457012	-0.257826	0.00533878	-0.170192	0.149534	0.0158823	-0.0937958	0.0388145	-0.0763239	0.174993	-0.13253	-0.0233889	0.0336233
-0.00150562	-0.00118327	0.273496		0.21551	0.138937	0.19841	0.0404154	0.0338358	0.416052	0.0504461	-0.140041	0.422477	-0.071818	0.0183686	-0.0719268	0.00445483	-0.0354735	-0.20783	-0.288053	-0.0440932	-0.00148842	0.0595087			0.00627338	0.2556	-0.0131006	0.0835948	0.0415065	0.0612286	-0.285642	-0.00862949	-0.169258	0.190424	-0.00805721	-0.0335877	0.0608062	-0.0158271	0.200965	-0.088391	-0.0208133	0.0555515
-0.00150133	-0.00121115	0.296172		0.25883	0.134897	0.133163	0.0338663	0.11957	0.394975	0.12136	-0.0686079	0.275232	0.0377306	0.0608834	-0.134224	-0.047709	-0.0913789	-0.3059	-0.14988	-0.114625	0.0196722	0.0302468			0.0448327	0.217195	0.00685214	0.00512825	0.113393	0.0392077	-0.234046	0.0537957	-0.145698	0.145623	0.0332979	-0.0172246	0.0951279	0.00666341	0.192358	-0.102956	0.0132647	0.0434291
-0.00150139	-0.00120686	0.35742		0.30215	0.181763	0.0142062	0.0535467	0.181922	0.462795	0.072559	0.0144414	-0.0550867	-0.0157076	0.120272	-0.153603	-0.000134184	-0.226737	-0.424749	-0.0538028	-0.20143	0.0328371	-0.0365551			0.0119609	0.224446	0.0724457	0.00432976	0.130635	0.018841	-0.195836	0.105936	-0.127282	0.134471	0.014073	-0.00489892	0.0685933	0.0397967	0.195591	-0.111727	0.0212727	0.0513995
-0.00149994	-0.00118997	0.533759		0.34547	0.217932	0.061061	0.0245225	0.175451	0.505395	0.0831566	0.0576523	-0.285901	0.101467	0.204172	-0.0121883	-0.0343189	-0.263845	-0.371703	-0.0737479	-0.144724	0.0696483	-0.0391008			0.0715536	0.19488	0.0472278	-0.0162175	0.147499	0.0524939	-0.177398	0.109208	-0.064725	0.174367	0.0501951	0.051741	0.0749863	0.0737756	0.159634	-0.0757383	0.0386215	0.0705637
-0.00150152	-0.00118587	0.250465		0.38879	0.21407	0.0804199	0.0312065	0.162432	0.489892	0.0588169	0.0375708	-0.244193	0.162818	0.194888	0.0874816	-0.0131142	-0.216716	-0.312229	-0.0693626	-0.169743	0.0921201	-0.0303402			0.0243349	0.125967	0.101317	-0.131217	0.120175	0.0866843	-0.211188	0.158677	-0.0296285	0.19411	-0.0324774	0.0374836	0.0355197	0.0873634	0.0956016	-0.0459549	0.0129568	0.0641391
-0.0014971	-0.00121109	0.323972		0.43211	0.228957	0.0125781	0.080684	0.177715	0.415238	0.0123972	0.0402429	-0.220101	0.168204	0.266757	0.0766304	0.0513935	-0.1832	-0.326427	-0.0544476	-0.266813	0.0965385	-0.0365625			0.0935063	0.113595	0.149541	-0.147995	0.049585	0.0960945	-0.159358	0.168033	-0.0386232	0.217828	-0.132066	-0.0165889	0.0177242	0.157947	0.0604449	-0.00770323	0.00509433	0.0726513
-0.00149571	-0.00120686	0.213808		0.47543	0.148946	-0.00499267	0.0123293	0.141909	0.359117	0.017923	-0.0357855	-0.00246107	0.21618	0.216595	0.0546642	0.132423	-0.190948	-0.277546	-0.130642	-0.152321	0.0542327	0.00894121			0.0623083	0.11495	0.232629	-0.209188	0.0301002	0.117128	-0.13046	0.143243	-0.0477426	0.208586	-0.167753	-0.0244298	-0.0522919	0.144048	0.127814	-0.00569039	0.00682538	0.0610808
-0.00149571	-0.00120264	0.210697		0.51875	0.152303	0.0462497	0.0125637	0.0532233	0.199161	-0.0590752	-0.00969399	0.0470295	0.192001	0.274172	0.142733	0.142935	-0.249274	-0.083396	-0.154273	-0.0745944	0.03569	0.0433181			0.108221	0.108546	0.217186	-0.216428	0.0550379	0.15163	-0.156402	0.140775	-0.116083	0.187283	-0.109475	0.00124594	-0.0970086	0.167219	0.101676	0.0647023	0.000394022	0.0756216
-0.00149545	-0.00119829	0.314708		0.56207	0.167417	0.0593847	0.0439992	0.0134286	0.145638	-0.11207	0.0442619	0.0337713	0.124212	0.209624	0.183905	0.194088	-0.210381	0.0909158	-0.187139	-0.0448268	0.0389891	0.0555394			0.0893448	0.0846141	0.280479	-0.157919	-0.00037227	0.184914	-0.174473	0.0881313	-0.10252	0.206927	-0.107705	-0.0377164	-0.130459	0.138899	0.0952984	0.0420553	-0.00630082	0.0687382
-0.00149704	-0.001194	0.29517		0.60539	0.136899	0.0351703	-0.0135873	0.0263526	0.140341	-0.19437	0.086773	0.132674	0.182187	0.215185	0.189102	0.153824	-0.279791	0.18559	-0.0947545	-0.035865	0.0433961	0.0648202			0.108371	0.057879	0.354341	-0.122046	-0.0226013	0.218831	-0.108296	0.0867605	-0.0618156	0.151675	0.0575343	-0.0644126	-0.146595	0.122963	0.119716	0.0297957	0.0375817	0.0601807
-0.00149148	-0.00121109	0.452326		0.64871	0.133671	-0.102388	0.040384	-0.0908753	0.172968	-0.187658	0.181425	0.155276	0.195601	0.131265	0.127835	0.0726296	-0.19334	0.160613	-0.0893984	0.0200254	0.0711433	0.019861			0.127121	0.0449656	0.358195	-0.0504554	-0.00220869	0.239628	-0.134476	0.0579665	-0.0155025	0.204722	0.0504872	-0.0572844	-0.152992	0.0910401	0.182693	0.0430431	0.0516645	0.0717032
-0.00149135	-0.00119616	0.462404		0.69203	0.116532	-0.117323	0.110187	-0.0421166	0.0882186	-0.242157	0.125396	0.13987	0.371137	0.102966	0.082221	0.0366003	-0.160627	0.189039	-0.089959	0.0475231	0.0803882	0.0143002			0.129985	0.0819374	0.306942	-0.0357578	0.0548022	0.252438	-0.151171	0.0280812	0.0268965	0.162573	0.113888	-0.104077	-0.113725	0.0191267	0.245387	0.0389773	0.0766255	0.0554124
-0.0014887	-0.00120648	0.455823		0.73535	0.15101	-0.189371	0.127333	-0.0732905	0.109161	-0.279755	0.0842048	0.119355	0.392797	0.117552	0.0666413	0.0481459	-0.121813	0.289845	-0.223032	0.103357	0.0732878	0.0169798			0.12509	0.0281049	0.230608	-0.0022625	0.0571804	0.248709	-0.172471	0.0258247	0.10176	0.13971	0.163759	-0.0589212	-0.0958331	0.0381224	0.284042	-0.000658795	0.0867668	0.0523286
-0.00148699	-0.00120219	0.450299		0.77867	0.0734192	-0.203841	0.0795322	-0.15656	0.0640638	-0.326263	0.0287493	0.0127582	0.42888	0.092087	0.090827	0.0575157	-0.00536985	0.275084	-0.245488	0.0587492	0.0643266	-0.0238087			0.103626	0.0685055	0.147843	0.0497766	-0.0214833	0.245985	-0.174196	-0.00589114	0.184625	0.125774	0.206398	-0.086154	-0.0587551	0.119212	0.312401	-0.0286586	0.0875574	0.0610687
-0.00148718	-0.00119219	0.33704		0.82199	0.0502827	-0.181492	0.00239162	-0.157516	0.0756918	-0.429469	-0.229088	0.0339453	0.359002	0.143635	0.0131196	-0.0672868	0.033957	0.25079	-0.186695	0.0708415	0.0148327	-0.042069			0.099367	0.1393	0.115121	0.107346	0.00439264	0.256069	-0.164864	-0.0198462	0.164726	0.11653	0.229102	-0.0161983	-0.0522006	0.126096	0.317594	-0.0240854	0.0891547	0.0856515
-0.00148403	-0.00118756	0.390736		0.86531	0.11777	-0.0839209	0.0339817	-0.137145	0.0413482	-0.19423	-0.267593	0.00369574	0.33993	0.165736	-0.0487043	-0.103669	-0.00306538	0.290895	-0.197828	0.128789	0.0019798	0.00876881			0.0900274	0.119368	0.107502	0.112099	0.00347644	0.232446	-0.1734	-0.0623157	0.176432	0.0858592	0.261122	0.0521245	-0.0424465	0.183364	0.284512	-0.0301605	0.0884032	0.0865981
-0.0014801	-0.00118339	0.413728		0.90863	0.135153	-0.0712696	-0.0610687	-0.187762	-0.0176889	-0.12299	-0.279055	0.0106003	0.280288	0.146087	-0.133208	-0.0559738	-0.0625859	0.191059	-0.25085	0.149503	-0.0486268	0.00740673			0.0573844	0.127614	0.104216	0.0953694	0.0234548	0.202995	-0.158281	-0.118515	0.169015	0.0513652	0.246205	-0.00939137	-0.0631876	0.16389	0.360361	-0.00469323	0.092396	0.0635792
-0.00147936	-0.00121115	0.230351		0.95195	0.150311	0.0364199	-0.122391	-0.14368	0.0229801	-0.0507346	-0.222644	-0.0189733	0.274031	0.10617	-0.142911	0.0352567	-0.0381133	0.124576	-0.229975	0.155575	-0.0385889	0.0305764			-0.0230474	0.146498	0.097286	0.0974482	0.0494266	0.188283	-0.132603	-0.119637	0.135603	-0.00549715	0.255636	0.044564	-0.0280493	0.216958	0.345283	0.00738396	0.0874418	0.0720002
-0.00148164	-0.00120397	0.316938		0.99527	0.120315	0.0319375	-0.168658	-0.118229	0.0714789	0.0684909	-0.0381997	-0.0107869	0.258134	0.00782652	-0.122142	-0.00144564	-0.0346851	0.151607	-0.092411	0.175144	-0.000771086	0.0380681			0.0370596	0.130176	0.0737864	0.051779	0.0751382	0.15743	-0.0924026	-0.0810552	0.125189	-0.00142049	0.212674	0.0630203	-0.0529515	0.245895	0.316469	0.037105	0.0868703	0.0753662
-0.00148348	-0.00119772	0.292667		1.03859	0.103328	0.0768777	-0.221009	-0.120945	0.00623763	0.0744742	-0.00103286	-0.0654037	0.174325	0.0151849	-0.095452	-0.0155277	-0.0732108	0.0307307	-0.0878309	0.0356908	-0.0243306	0.00388521			0.0195495	0.147135	0.113393	0.0440484	0.144773	0.103773	-0.0603546	-0.045215	0.108247	-0.0630491	0.170199	0.0533937	-0.0344646	0.235935	0.227097	0.0483018	0.0860549	0.0655404
-0.0014791	-0.00119565	0.287		1.08191	0.119384	0.078443	-0.279533	-0.12299	0.0559628	0.0857678	0.055007	-0.128234	0.129709	-0.011991	-0.0523006	0.0434242	-0.153135	-0.0254783	-0.0799679	0.0259701	-0.0256092	-0.00688611			-0.00940693	0.143266	0.0786254	0.0168534	0.0602426	0.105312	-0.0363346	-0.0164954	0.11002	-0.0761671	0.0894184	0.0624045	0	0.241118	0.204463	0.061994	0.0621284	0.0672856
-0.00147507	-0.00121109	0.253483		1.12523	0.0681231	0.141063	-0.323164	-0.122084	0.0596216	-0.00740843	0.0449368	-0.0847527	0.272476	-0.0426056	0.030144	-0.0417699	-0.0503166	-0.012141	-0.201545	-0.0314115	-0.0124656	-0.0251388			0.0270553	0.0848828	0.0100913	-0.0064527	0.0593053	0.0854628	0.00173443	0	0.130211	-0.00294479	0.0363985	0.0410736	0.0736217	0.181424	0.118118	0.0608284	0.057067	0.0555343
-0.00147728	-0.00120353	0.227372		1.16855	0.0416077	0.169403	-0.350918	-0.0816707	0.0530366	-0.0198708	0.0519117	-0.0754312	0.184798	-0.0980792	-0.0106615	0.0231339	-0.129154	-0.157539	-0.21973	-0.103498	-0.0473887	-0.0429439			-0.00554729	0.0211427	0.0186176	-0.0512597	-0.00532111	5.66381e-05	0	0.0844125	0.118533	0	-0.0856139	0.021348	0.106115	0.166591	0.0773295	0.0728856	0.0280141	0.0393971
-0.00147133	-0.0011926	0.370266		1.21187	-0.0709572	0.201333	-0.284929	-0.0608985	0.0310506	-0.0168702	0.089976	-0.0266879	0.139785	-0.0758825	-0.0622019	0.115148	-0.028879	-0.135445	-0.300548	-0.0681577	-0.060838	-0.00843255			0.0357711	-0.0208366	-0.0116069	-0.0539647	-0.0668153	-0.0193352	0.0266502	0.0606831	0.0471598	-0.0193535	-0.151739	0.0293342	0.127026	0.168442	0.0718795	0.0484115	0.00979076	0.0241726
-0.00147557	-0.00119149	0.379586		1.25519	-0.113069	0.196626	-0.266512	0.0464226	0.00145471	0.0367696	0.129871	0	0.126956	-0.0937589	-0.0657473	0.0981148	-0.0456499	-0.0339784	-0.369405	0	-0.0752628	0.0312745			-0.00934017	-0.0605229	-0.00334752	-0.0171088	-0.0253815	-0.038428	0.0463928	0.07928	-0.0291632	-0.0457991	-0.120159	-0.00747105	0.137004	0.0971753	0.058744	0.0468076	0.00684362	0.00674162
-0.00147084	-0.00121109	0.423706		1.29851	-0.0757412	0.261087	-0.182842	0.100067	-0.105891	-0.0740379	0.178756	-0.0208338	0.00508825	0	-0.134522	0.0756041	0.0520471	0.0918552	-0.23678	-0.0133557	-0.0624856	0.0525483			0.0434785	-0.037075	0	0.00209957	0.0300661	-0.0524182	0.0271238	0.0778842	-0.120106	-0.0288913	-0.0915447	0.0141164	0.144209	0.0437823	0	0.0483782	0.00415333	0.00848452
-0.00147299	-0.00120315	0.200558		1.34183	-0.0710256	0.203058	-0.167694	0.0858572	-0.0647003	0	0.177359	0.0342509	-0.0881793	-0.0673543	-0.198165	0.0278914	0.15105	0.105851	-0.206128	0.00915361	-0.0584354	0.0498385			0	-0.0798689	0.0428876	0.0131847	0.00526415	-0.0366728	-0.00611473	0.0361234	-0.0295187	0.00376939	-0.0854829	-0.016075	0.128827	-0.0404272	-0.000850475	0	0.0068765	-0.0149958
-0.00147134	-0.00118819	0.403656		1.38515	-0.076045	0.0825986	-0.117649	0.120349	-0.0412684	-0.00894602	0.198359	0.0865898	-0.0349164	-0.0238541	-0.126604	0.0129771	0.125144	0.0731326	-0.143916	-0.0613018	-0.027112	0.0351932			0.00929829	-0.0412067	0.0426291	-0.0522659	0.0409651	0.0245888	0.0194073	0.0391519	-0.0142148	-0.0320808	0	-0.0628088	0.0895438	-0.0602712	-0.0548404	-0.0185176	0.0165985	-0.0254263
-0.00146648	-0.00120944	0.426842		1.42847	0.0144294	-0.00961315	0.0189613	0.0618704	-0.0297617	0.0447757	0.214298	0.067066	-0.0573163	-0.0836878	-0.134313	-0.0252226	0.158777	0.0702664	-0.132839	0.016263	0.00652932	0.0177147			0.0144389	-0.135498	0.0160229	-0.0963624	0.0390717	0.0280972	-0.010546	0.0425415	-0.00169167	-0.0104708	-0.0576633	-0.0305216	0.0706664	-0.105313	-0.127794	-0.0403621	-0.00718686	-0.0434861
-0.00146813	-0.0012049	0.166779		1.47179	-0.0217478	-0.0667207	-0.00398009	0.107995	0.0946992	-0.0141564	0.128501	0.0372018	-0.0593546	-0.0329045	-0.197533	0.018819	0.194592	0.198857	-0.18365	0.00519435	-0.00605913	0.0317858			0.00441862	-0.160279	-0.0475099	-0.11652	-0.000806106	0.0427081	-0.0230485	-0.0357393	-0.0158833	-0.0397778	-0.0286066	-0.0487936	0.104049	-0.165064	-0.080288	0.00191012	-0.0109594	-0.0651946
-0.00146287	-0.00118607	0.403648		1.51511	-0.0703634	-0.149023	0.0445586	-0.00118128	0.186295	-0.0803691	0.0158203	-0.00309857	-0.13113	0.00383271	-0.274328	0.0295194	0.231116	0.221254	-0.184484	0.098416	-0.0228145	0.0149187			-0.0550625	-0.204077	-0.11111	-0.0551922	-0.0518012	0.0349662	0.000753554	-0.0236556	0.049084	-0.00274682	-0.00220362	-0.0376683	0.0556974	-0.101141	-0.0658251	-0.0412402	-0.0225584	-0.0538443
-0.00146711	-0.00118997	0.301448		1.55843	-0.140356	-0.14279	0.0709393	-0.0300727	0.242605	0.000458342	-0.116026	-0.143315	-0.157375	0.0435257	-0.167657	0.00724122	0.284435	0.0789805	-0.0926074	0.167606	-0.00950518	-0.00229571			-0.087855	-0.161481	-0.101125	0	-0.115112	0.0338484	-0.0100832	-0.0391966	0.000711851	-0.0286911	-0.042242	-0.0629614	0.062376	-0.150857	-0.0369662	-0.0115971	-0.0412869	-0.052617
-0.00146699	-0.00118498	0.390479		1.60175	-0.112519	-0.159487	0.0889692	0.0573014	0.311558	0.0374716	-0.335765	-0.154107	-0.174595	0.055229	-0.0321411	-0.0432419	0.164654	0.0763762	-0.101928	0.202432	-0.023971	0.00899678			-0.0569587	-0.179771	-0.0201383	0.0119366	-0.0739804	-0.0165336	-0.0437167	-0.0243522	-0.0360963	-0.0142933	-0.0840343	-0.0137833	-0.014663	-0.188233	-0.0252303	0.0200541	-0.0443522	-0.050622
-0.00146219	-0.00120693	0.491616		1.64507	-0.078863	-0.124732	0.121909	0.133217	0.249076	0.113349	-0.284916	-0.173504	-0.0766516	0.129989	0.119443	-0.0533422	0.0669997	0.0762885	-0.167887	0.243258	-0.00636142	0.0430653			-0.0836642	-0.193988	-0.000625714	0.0361144	-0.0777991	0	-0.0963724	-0.0362865	-0.0707204	-0.00384094	-0.0472524	0.00549409	-0.0584223	-0.13662	-0.0891816	0.00637277	-0.0655048	-0.0403442
-0.00146124	-0.00120277	0.353922		1.68839	-0.0238522	-0.127603	0.0637582	0.0639893	0.16659	0.117815	-0.291513	-0.0660714	-0.102882	0.15928	0.195714	-0.102268	0.109914	-0.0130415	-0.29508	0.238756	-0.0221687	0.0338571			-0.0686479	-0.160429	0.0207691	0.0792524	-0.0181344	-0.0317793	-0.0553076	-0.0108836	-0.0318014	-0.0284945	-0.0509843	-0.010393	-0.0868134	-0.102027	-0.0579455	-0.0296279	-0.0436082	-0.0367978
-0.00145978	-0.00118327	0.320011		1.73171	0	-0.118965	0.0745676	0.0602463	0.173864	0.150586	-0.381346	-0.178304	-0.165355	0.0361415	0.257952	-0.133956	0.090201	-0.0553499	-0.263912	0.200713	-0.0267535	-0.00486103			-0.0617763	-0.161101	0.00928735	0.0792662	-0.00759098	-0.0322794	-0.046778	0.0783617	-0.0455913	-0.0564359	-0.0436987	-0.0165306	-0.103437	-0.0530754	-0.0373102	-0.0429191	-0.0421119	-0.0255892
-0.00145301	-0.00119699	0.467497		1.77503	0.0471521	-0.210391	0.0586077	0.0110988	0.239514	0.144371	-0.304042	-0.271884	-0.104289	0.0253118	0.313791	-0.108655	0	-0.141113	-0.213795	-0.00971174	0.00461738	-0.0701217			-0.0035499	-0.195803	0.0316034	0.0592112	-0.0369426	0.0230323	-0.0520635	0.0997175	-0.0542984	-0.00703857	-0.0861629	-0.0138301	-0.119159	-0.0380054	-0.0490837	-0.0312965	-0.046207	-0.0130015
-0.00145739	-0.00120007	0.378356		1.81835	0.147655	-0.210074	0.0743471	0	0.215983	0.0622159	-0.279341	-0.205496	-0.155787	0.0300087	0.263741	-0.224015	-0.0841649	-0.179847	-0.227953	-0.0392987	-0.0056899	-0.0958132			0.0259541	-0.127292	0.0257312	0.0392174	-0.0578548	0.00184747	-0.095518	0.0666955	-0.0808037	-0.0129887	-0.101499	0.0129081	-0.0810496	-0.0128501	-0.0452024	-0.00796635	-0.0512802	-0.00505358
-0.00145341	-0.00121083	0.458393		1.86167	0.162169	-0.251219	0.0231104	-0.0694139	0.210652	0.0514459	-0.247741	-0.0996814	-0.0516618	-0.0569444	0.27581	-0.245373	-0.0238806	-0.16382	-0.166027	0.0968347	0.0228039	-0.0922714			0.0338759	-0.137978	0.0149179	0.0360788	-0.101805	0.0223133	-0.106928	0.0640673	-0.0728806	0.0878749	-0.108717	0.0661135	-0.0515307	-0.000478283	-0.0535499	-0.0314959	-0.0558271	0.013312
-0.00145145	-0.00120648	0.333518		1.90499	0.160158	-0.195731	-0.0258545	-0.0880483	0.114928	-0.0132907	-0.236455	-0.00318506	-0.0410463	-0.0114441	0.298757	-0.346485	-0.00881651	-0.146824	-0.176633	0.0517561	0.0106297	-0.0941565			0.073725	-0.119361	0.0447474	0.0754147	-0.0810986	-0.0199249	-0.106803	-0.0125307	0.00457127	0.119092	-0.117738	0.0717666	-0.0532299	-0.0114734	-0.0311014	-0.00296204	-0.0333659	0.0125026
-0.00144859	-0.00119588	0.400082		1.94831	0.198315	-0.0747964	-0.0532789	-0.0532016	0.0774868	-0.00117417	-0.105155	0.110491	-0.0386462	0.000679768	0.21788	-0.264109	-0.0289992	-0.171493	-0.0962297	0.106154	0.0214215	-0.0434312			0.0553973	-0.0693819	0.0923764	0.0744035	-0.0718081	-0.0607387	-0.123153	-0.0463948	0.000812772	0.179237	-0.115907	0.0787578	-0.0309016	-0.00892921	-0.0165603	-0.00722004	-0.026218	0.0174667
-0.00145322	-0.00119273	0.382343		1.99163	0.22944	-0.0177367	0.0294642	-0.0348798	0.0345093	-0.0473265	0	0.309026	-0.0295093	-0.0300744	0.262939	-0.168378	0.0512071	0.0270575	0	0.0748153	0.0722564	0.014063			-0.0177319	-0.0567249	0.0498604	0.052028	-0.0461084	-0.0327214	-0.185165	-0.0862038	-0.0588591	0.182971	-0.104111	0.0867647	0.0396046	0.00857374	-0.0423322	-0.0647853	-0.0456053	0.0112377
-0.00145366	-0.00118851	0.451437		2.03495	0.259392	-0.0406441	0.0552796	-0.0285574	0.00429978	-0.162948	0.0327362	0.388929	-0.0209227	0.0695639	0.25935	-0.124773	-0.00240737	-0.00302262	0.102017	0.0955902	0.0862181	0.0242671			-0.041084	-0.0514281	0.0798753	0.0291303	0.0196544	-0.0546551	-0.182903	-0.03493	-0.0641854	0.186148	-0.0895376	0.0449295	0.0950059	0	-0.0907414	-0.0634932	-0.0342395	0.0069627
-0.00144823	-0.00120226	0.244078		2.07827	0.278977	-0.00206136	0.0420027	-0.00545299	-0.0301778	-0.185916	-0.0517796	0.468677	-0.118044	0.0574765	0.104183	-0.0572556	0.0111214	0	0.208622	0.0916365	0.0556131	0.045888			-0.0144986	0	0.0794469	-0.0108971	0.0627568	-0.0820466	-0.19646	0.000281924	-0.0539092	0.237053	-0.0488666	0.129775	0.121219	-0.00693899	-0.0474077	-0.0648818	-0.0122149	0.0252932
-0.00144918	-0.00118574	0.410585		2.12159	0.21181	0.035441	0.0407207	0.0159738	-0.09143	-0.217589	-0.00976148	0.550279	-0.137577	0.0723462	0.0767592	-0.0221722	0.0526289	-0.0644645	0.241861	-0.055657	0.0481264	0.0392697			-0.0167784	0.0372065	0.0289381	-0.0897541	0.0317095	-0.085846	-0.211552	-0.0182837	0.0428571	0.199702	-0.0157784	0.0578752	0.103869	0.0132397	-0.0467837	-0.083936	-0.0104398	0.00377548
-0.00144432	-0.00119413	0.429567		2.16491	0.181729	0.0464477	0.0517145	0.0138769	-0.0964902	-0.262577	-0.00343554	0.640056	-0.0911949	0.0520616	0.137802	0.0899187	-0.066117	-0.0446577	0.331967	-0.0952903	0.0557468	0.0549795			-0.0523612	0.0415539	0.0420499	-0.174261	0.0350291	-0.0239564	-0.155401	-0.0162239	0.0905643	0.157286	0.0187647	0.00373427	0.123084	0.0490804	-0.122719	-0.0928817	-0.00262377	-0.00695853
-0.00144002	-0.00119394	0.532966		2.20823	0.191851	0.0974522	0.0134307	-0.0571878	0	-0.316231	-0.0498374	0.674478	-0.129603	0.0457755	0.0136794	0.175003	-0.0420273	-0.0536387	0.297484	-0.0159923	0.036872	0.0687073			-0.0324185	0.0235886	0.0120134	-0.225835	0.00402708	-0.035822	-0.108898	-0.0342091	0.014063	0.174348	0.0404452	0.00909859	0.10983	0.092157	-0.170236	-0.00590557	-0.0163966	-0.000322352
				2.25155	0.0264232	0.0512071	-0.0616661	-0.0580714	0.023915	-0.466965	-0.140334	0.662906	-0.0962673	0.0561303	-0.156871	0.177518	-0.0226753	-0.111412	0.370017	-0.0765451	-0.00718225	0.029346			-0.0298743	0.0589643	-0.0381828	-0.245805	0.0413945	-0.0170367	-0.047826	-0.0333558	0.0195541	0.170573	0.0215677	-0.0288767	0.0575196	0.0848322	-0.0716812	0.0761314	-0.00594106	0.00817841
				2.29487	0.00846178	0.0214178	-0.0114203	-0.0877955	-0.141526	-0.351358	-0.131394	0.507227	-0.101028	-0.00817665	-0.179336	0.106583	0.0224707	-0.127243	0.52902	-0.0793001	-0.000593975	-0.00233059			-0.061122	0.0668074	-0.0300578	-0.257737	0.0311315	-0.0294234	0.0186135	0.0175736	0.0550031	0.117389	0.0662072	-0.0421189	0.0205883	0.108661	-0.0204401	0.057975	0.00999046	0.00489077
				2.33819	-0.0739148	0.0666766	-0.00474566	-0.0356014	-0.13088	-0.165847	-0.231745	0.399234	0.00976326	0.0131788	-0.0277812	-0.000456804	-0.0276938	-0.08191	0.523043	-0.0947678	0.00450571	0.0125633			-0.0732546	0.140261	-0.0298015	-0.222294	0.0164246	-0.0869722	0.0225876	-0.00675925	0.0484964	0.000435891	0.0176617	-0.0372704	0.0250833	0.0492076	0.0412995	0.126062	0.00856212	-0.00466601
				2.38151	-0.0598898	0.129228	-0.0298931	0.0774672	-0.135612	-0.135271	-0.216709	0.327769	0.125455	-0.0427526	0	-0.0265091	-0.127684	-0.00242588	0.411191	-0.197183	-0.00414267	0.0162902			-0.0919898	0.144914	-0.00581322	-0.202023	0.0130659	-0.102813	0.0612303	0.0214709	0.101789	0.0106464	0.0183639	-0.0246584	-0.0145595	0.0682035	0.0359943	0.126284	0.0147601	0.00525319
				2.42483	-0.101539	0.163287	-0.00769402	0.095949	-0.227135	-0.0767944	-0.112134	0.175562	0.205289	-0.055923	0.00279137	-0.0408892	-0.185646	0.0524804	0.348401	-0.171902	-0.00970837	0.0177211			-0.0578754	0.135728	-0.0439931	-0.173359	0.0212104	-0.0963397	0.0797267	0.0201849	0.11283	-0.0791176	0.0638028	0	-0.040387	0.140079	0.049823	0.111483	0.0231422	0.00733237
				2.46815	-0.0551983	0.196588	-0.0781665	0.0595977	-0.259966	0.0197808	-0.0998887	0.121196	0.203331	-0.0448354	-0.0981986	0.0196241	-0.0986321	0.0434125	0.327632	-0.212572	-0.0198858	0.025349			0.0223427	0.0925985	-0.0357545	-0.135303	0.043936	-0.0884264	0.10154	0.0355242	0.130997	-0.104997	0.0315836	-0.045759	-0.0395018	0.100566	0.146141	0.083083	0.0501606	-0.00783917
				2.51147	-0.0690198	0.188521	-0.030651	0.057991	-0.187014	0.0280819	0.0103861	-0.0587586	0.255107	-0.0978587	-0.0998695	-0.0103437	-0.159647	-0.0854226	0.352788	-0.243612	0.00900996	-0.0276753			0.0760267	0.087032	-0.0382175	-0.123526	0.0109	-0.0918928	0.097135	0.0193769	0.0696127	-0.0671971	0.0450423	-0.094676	-0.036354	0.0500521	0.192221	0.102508	0.0520458	-0.0147903
				2.55479	-0.113902	0.109189	0.00987875	0.0380807	-0.181367	0.0649599	0.198485	-0.137633	0.342864	-0.055599	-0.205426	0.0210321	-0.138741	-0.127294	0.428851	-0.299367	0.0425803	-0.0483289			0.128505	0.0848546	-0.0201639	-0.0746836	-0.0226981	0.0132411	0.127773	-0.00576817	0.0442752	-0.0578921	0.0150711	-0.0171464	-0.0613354	0.0209987	0.205016	0.0834781	0.0520553	0.00588528
				2.59811	-0.14654	0.0416987	0.0419566	0.0598355	-0.144784	0.0555571	0.302039	-0.0644553	0.241254	-0.0133601	-0.228187	-0.0255824	-0.0560759	0.0697375	0.359003	-0.027049	0.0460831	0.0120478			0.206005	0.133082	-0.0509133	-0.0292342	-0.00576799	-0.000885478	0.100053	-0.0241282	0.0168986	-0.00545106	-0.0374451	0.00358986	-0.112363	-0.00122856	0.232397	0.100773	0.043608	0.0220647
				2.64143	-0.206586	0.0377116	0.0199198	-0.031207	-0.0889416	0.0736256	0.356389	0.0361605	0.27651	-0.0484487	-0.0841275	0.0216546	-0.0674109	0.181138	0.450359	0.061533	0.082014	0.0415209			0.190022	0.0841668	0.0090566	-0.00393597	-0.00348948	0.0540494	0.121744	-0.0312641	-0.0192781	0.0900542	0.0256164	0.0110937	-0.178732	-0.05243	0.209824	0.0576473	0.0443454	0.0261727
				2.68475	-0.149515	-0.0102968	-0.0745052	0.0209796	-0.0847194	0.0749432	0.474295	0.0809879	0.245354	-0.101278	0.0278839	0.00928183	0.0142749	0.198309	0.320393	0.0505519	0.0966827	0.0404349			0.195818	0.0711158	-0.0203475	0.0559492	0.00464369	0.0645822	0.163175	-0.0548623	-0.0007635	0.14853	0.0478493	-0.0289444	-0.143481	-0.0898856	0.179417	0.0167007	0.0532889	0.0228982
				2.72807	-0.0587529	-0.0537537	-0.0658174	-0.0328504	-0.0414668	0.0898329	0.523959	0.0927544	0.287329	-0.142347	-0.0198613	0.0368076	0.0614593	0.212305	0.250562	0.0599839	0.117176	0.0328415			0.163501	0.0666276	-0.0054563	0.0928741	0.0389436	0.107475	0.123827	-0.0181321	-0.0570902	0.266216	0.102702	-0.0291317	-0.0590209	-0.170378	0.147397	-0.0221957	0.0568505	0.0366694
				2.77139	-0.0161069	-0.0727979	-0.0846924	-0.113458	-0.0463247	0.0947887	0.509447	0.139347	0.284358	-0.0952043	0.0056196	0.0705499	0.137693	0.216342	0.20703	0.0323931	0.124628	0.0339951			0.142859	0.0390063	-0.0541523	0.110832	0.0259032	0.165105	0.0858585	0.0545691	-0.0863868	0.203763	0.11973	0.0158317	0.00517767	-0.142681	0.14334	-0.0747292	0.0477912	0.0464622
				2.81471	-0.0329363	-0.0638355	0	-0.0843613	-0.051864	0.0764005	0.343173	0.0428751	0.223366	0.0595299	0.0705632	0.0386858	0.223778	0.143166	0.237162	0.0217234	0.126655	0.029273			0.14057	-0.0034776	-0.0519667	0.0888188	0	0.15848	0.0948151	0.0738596	-0.0698137	0.168872	0.100016	-0.00270003	0.0274476	-0.101774	0.0863325	-0.0498094	0.0409251	0.0415336
				2.85803	0.0383439	0	0.0415506	0.0282751	-0.0164942	0.0756211	0.199777	0.0802975	0.142473	0.0807246	0.0753306	0.0317448	0.178382	0.108373	0.2386	-0.0578479	0.112245	0.0433985			0.132561	0.0286316	-0.0915204	0.0932891	-0.00193577	0.147449	0.111309	0.0649213	-0.0749019	0.150502	0.143133	0.0101023	0.00539347	-0.0467856	0.0820208	-0.0489448	0.0382574	0.0498956
				2.90135	0.0499238	-0.0387233	0.0453482	0.0506411	-0.0520933	-0.0782668	0.189982	-0.0190812	0.112121	0.12793	0.12219	0	0.157495	0.0957754	0.216578	-0.0751169	0.105193	0.00789477			0.0820435	0.060497	-0.0797422	0.0749857	-0.05147	0.145154	0.0789798	0.0301603	0	0.109694	0.111519	-0.00175272	-0.00694635	0.0265576	0.0337073	-0.0779292	0.0210114	0.0459208
				2.94467	0.127429	-0.0757811	0.0231417	0.035808	0.023163	-0.029848	0.129703	-0.0864149	0.0657987	0.120949	0.129348	0.0121952	0.0901969	0.100748	0.350232	-0.0206779	0.117377	0.00712236			-0.00753315	-0.0315492	-0.0120465	0.0506337	-0.0411607	0.218078	0.0535738	0.0535897	0.00044388	0.061728	0.117028	0.0102053	-0.00709952	0.0638363	0.01633	-0.0653548	0.014942	0.0451459
				2.98799	0.203494	-0.0818059	0.0170846	-0.0258412	-0.0239366	-0.0447105	-0.0612319	-0.00313501	0	0.184754	0.128876	-0.0917654	0.0743243	-0.00630264	0.217693	-0.0985606	0.0695379	-0.0209209			-0.0102912	-0.0496055	0.019598	-0.00886392	-0.0498608	0.174603	0.0766107	0.0700443	-0.0833157	0.0519047	0.0816177	-0.0349559	-0.0645972	0.107428	0.00190308	0.0197159	-0.00354192	0.0412837
				3.03131	0.189991	-0.162117	0.013237	-0.00843104	-0.0754392	-0.0694019	-0.15477	0.0254037	-0.0015732	0.158798	0.0977133	-0.219057	0.0143016	-0.026318	0.397582	-0.210699	0.0601302	-0.0639777			-0.0525777	-0.0376642	0.0828992	-0.022824	-0.0293016	0.157729	0.0765644	0.141221	-0.0162773	0.0351676	-0.00397533	0.0149868	-0.0966377	0.134679	-0.03045	0.0369752	-0.0087195	0.0575339
				3.07463	0.279713	-0.10155	0.0419601	0.013584	-0.194484	0.0799099	-0.14059	-0.029632	-0.0169228	0.108207	0.137021	-0.297704	0.0281259	0.0152757	0.578723	-0.210037	0.0891933	-0.0527433			-0.165905	-0.0331664	0.0713171	-0.0311611	-0.00291468	0.1163	0.088351	0.172455	0.0102911	0.0171372	-0.065568	0.0414926	-0.093739	0.150034	0.00993504	0.0127225	-0.018529	0.0557267
				3.11795	0.214745	0.0226196	-0.0049324	0.0493541	-0.129044	-0.0526877	-0.194481	-0.075474	-0.0113343	0.131975	0.146503	-0.380781	-0.0690898	0.0191182	0.574116	-0.206056	0.0658104	-0.0614914			-0.222942	-0.0014175	0.026021	0.012811	0.0187942	0.0588299	0.0674278	0.188484	0.0399343	0.0456944	-0.0873247	0.0578385	-0.0847196	0.157086	0.0022441	0.0740907	-0.0300706	0.0741771
				3.16127	0.304953	0.0495225	-0.06067	0.00265395	-0.12645	-0.0569346	-0.0369141	-0.142125	-0.0434228	0.0996723	0.117917	-0.299929	-0.105622	-0.0152116	0.568668	-0.185518	0.0773074	-0.0684837			-0.293624	0.00168559	0.0549017	0.0315105	0.0594958	0.0349188	0.011808	0.202859	0.0900221	0.107657	-0.147879	0.0358861	-0.0818037	0.137581	0.0282362	0.0707515	-0.0348553	0.0778561
				3.20459	0.230697	0.0137679	-0.0444497	0.016402	-0.147352	-0.0568511	-0.0156184	-0.156192	-0.0660932	0.0489094	0.0830885	-0.299033	-0.165809	-0.043996	0.580083	-0.140779	0.0568184	-0.0772216			-0.217448	-0.0413372	0.0532787	0.025255	0.128906	0.0120483	-0.0417067	0.201093	0.0594957	0.080411	-0.15708	0.0215933	-0.0881517	0.143917	0.0529417	0.0809841	-0.0262205	0.0654956
				3.24791	0.262182	0.13108	-0.108284	0.0982682	-0.107471	-0.0811224	0.0459471	-0.0234693	-0.0811265	0.124499	0.0424271	-0.308576	-0.187933	-0.135778	0.47233	-0.163261	0.042259	-0.044795			-0.201218	-0.0749798	0.108075	0.0763405	0.167845	0.0578136	-0.0462075	0.211179	0.00412891	0.147575	-0.204659	-0.0129739	-0.0792883	0.149929	0.0770772	-0.0133348	-0.0217808	0.0676936
				3.29123	0.168312	0.0860696	-0.0746714	0.11371	-0.04757	-0.117392	0.146749	-0.0273424	-0.104135	0.061719	-0.0477216	-0.293227	-0.24567	-0.229125	0.527043	-0.0891813	0.0402919	-0.0618462			-0.1982	-0.0456998	0.102283	0.0893448	0.190789	0.0692571	-0.0565068	0.145795	0.0296697	0.149317	-0.233015	-0.0622471	-0.0855371	0.160346	0.108141	-0.0293522	-0.0177971	0.059595
				3.33455	0.0814377	0.0477634	-0.0925596	0.126627	-0.05233	-0.237404	0.177335	-0.000532544	-0.224865	0.0665717	-0.0641171	-0.253861	-0.292267	-0.19402	0.594225	-0.114463	0.0158573	-0.0699148			-0.2006	-0.115806	0.092655	0.0900814	0.220518	0.119666	0.00727566	0.0752901	0.0273814	0.127868	-0.274345	-0.0383416	-0.135362	0.158305	0.176111	-0.0979054	-0.0107957	0.0398947
				3.37787	-0.0119798	0.0495353	-0.188986	0.114517	-0.0714705	-0.225104	0.243361	0.0356202	-0.274452	0.0399989	0.0300719	-0.224038	-0.334743	-0.13493	0.427755	-0.0354394	-0.0225553	-0.04748			-0.13594	-0.142547	0.0597298	0.0727232	0.225437	0.0565614	0.0111907	0.0252893	-0.0277254	0.200629	-0.270956	-0.0682212	-0.239213	0.169447	0.204595	-0.112097	-0.0216102	0.025223
				3.42119	-0.0408574	0.0873309	-0.337802	0.123852	-0.162785	-0.29306	0.264383	0.212295	-0.18436	-0.0356076	0.0558295	-0.196973	-0.39419	-0.131854	0.476163	-0.0775485	-0.0404524	-0.0389456			-0.173352	-0.15613	0.0517794	0.0202977	0.179138	0.0642075	0.00586348	-0.0564647	-0.0671015	0.248441	-0.215971	-0.104476	-0.254514	0.124596	0.197378	-0.106414	-0.0345973	0.0042573
				3.46451	-0.017566	0.0869217	-0.470017	0.153925	-0.221169	-0.195527	0.14171	0.269937	-0.112135	-0.0720604	0.0654968	-0.220885	-0.409069	-0.218223	0.308836	-0.102691	-0.0892392	-0.0373253			-0.137653	-0.147552	-0.0673463	0.089227	0.132565	0.063338	-0.0111803	-0.062206	-0.104975	0.290303	-0.168525	-0.101561	-0.266905	0.115982	0.157469	-0.10972	-0.0583189	0.0172264
				3.50783	-0.00994945	0.15557	-0.391207	0.166642	-0.318085	-0.144186	0.0881472	0.217624	-0.079188	-0.0397954	0.0311825	-0.240038	-0.309788	-0.193815	0.138792	-0.0637445	-0.106262	-0.0177179			-0.0879281	-0.0474904	-0.0655101	0.129882	0.092994	0.161762	-0.0713158	-0.060023	-0.0392897	0.313742	-0.064465	-0.0917018	-0.189073	0.0944042	0.220205	-0.0624142	-0.0255479	0.0547701
				3.55115	0.0422948	0.242684	-0.231873	0.269575	-0.33117	-0.0990324	0.00676148	0.291425	0.0394144	0.0732994	0.0829759	-0.186018	-0.315627	-0.172068	0.203392	-0.119145	-0.062979	0.0375899			0.0357703	0.0568738	-0.0542163	0.161252	0.0970895	0.258712	-0.0244974	0.0308486	-0.0476467	0.333727	0.0422705	-0.0353304	-0.119817	0.140159	0.300491	0.00527192	0.0286804	0.118939
				3.59447	0.0643335	0.272064	-0.0903462	0.39086	-0.306799	-0.0873966	0.0154351	0.285272	0.0806811	0.101701	0.233312	-0.101424	-0.206047	-0.109515	0.482283	-0.211697	0.0341066	0.0674832			0.167674	0.145308	-0.0798819	0.204257	0.067617	0.294803	0.00627714	0.0615647	-0.0207576	0.336028	0.129286	0.00297922	-0.0524084	0.18509	0.287406	0.129705	0.0631514	0.169967
				3.63779	0.2549	0.293071	0.0875946	0.438999	-0.116567	-0.0367989	0.17397	0.298196	0.187843	0.0683464	0.278923	-0.106464	0.00386155	-0.00904179	0.549933	-0.251607	0.177557	0.0868377			0.280319	0.299281	-0.0139669	0.314908	0.0599271	0.407294	0.0859993	0.174598	0.0732819	0.388168	0.205597	0.0713062	0.0525771	0.260208	0.402557	0.167913	0.143286	0.26046
				3.68111	0.412359	0.254958	0.148974	0.477131	0.0528131	0.0797804	0.196932	0.207689	0.317672	0.0731814	0.359465	0.0107206	0.186752	0.143179	0.583412	-0.202628	0.282298	0.130501			0.397891	0.394239	0.0966367	0.389454	0.127869	0.584644	0.0472607	0.305302	0.220434	0.485152	0.328169	0.129921	0.168243	0.239099	0.501957	0.225358	0.236058	0.344146
				3.72443	0.635942	0.320737	0.275866	0.473459	0.186019	0.180117	0.367638	0.241116	0.5041	0.182687	0.486254	0.125114	0.283336	0.22813	0.596605	-0.178008	0.41697	0.196669			0.517314	0.525709	0.256756	0.519866	0.161858	0.704023	0.143996	0.453523	0.341636	0.552866	0.408264	0.199323	0.253432	0.264201	0.66387	0.325304	0.343391	0.443102
				3.76775	0.816193	0.339606	0.414965	0.421452	0.245035	0.20723	0.37585	0.395654	0.670122	0.250904	0.530654	0.222892	0.353463	0.198163	0.698792	-0.148256	0.513134	0.235956			0.627679	0.717204	0.422307	0.616968	0.292794	0.765855	0.282181	0.63208	0.392431	0.606722	0.485064	0.281654	0.386399	0.322741	0.760063	0.420836	0.456115	0.545507
				3.81107	0.921943	0.346848	0.553284	0.40897	0.320323	0.228078	0.4944	0.305065	0.810318	0.267044	0.613779	0.345792	0.540987	0.277216	1.02335	-0.100606	0.659798	0.259801			0.807657	0.794951	0.603805	0.723376	0.500136	0.798965	0.346675	0.830021	0.539363	0.684057	0.614752	0.427715	0.520236	0.400062	0.872496	0.494806	0.60064	0.644244
				3.85439	1.00096	0.444987	0.632401	0.389865	0.46241	0.196004	0.664699	0.157297	0.893107	0.299917	0.539002	0.378446	0.667688	0.370263	1.35507	-0.0419551	0.776916	0.274353			0.925124	0.86711	0.758749	0.858161	0.733139	0.798612	0.490427	0.96809	0.664092	0.773498	0.73856	0.515526	0.750079	0.432898	1.09957	0.486966	0.769968	0.712608
				3.89771	1.07992	0.527208	0.759115	0.269681	0.548534	0.185929	0.788774	0.0363957	1.08761	0.292452	0.596211	0.424198	0.732615	0.327028	1.36851	0.0175719	0.870161	0.260058			1.08982	0.912692	0.92497	0.916049	0.912538	0.807209	0.563772	1.02454	0.793283	0.771788	0.909608	0.594898	0.913832	0.486822	1.12362	0.55254	0.90393	0.758318
				3.94103	1.22751	0.632579	0.794269	0.275812	0.733633	0.292472	0.812672	-0.0476578	1.27611	0.302596	0.513303	0.50091	0.763641	0.398557	1.51189	0.0569616	0.954129	0.301529			1.20054	0.94991	1.15251	0.949836	1.09802	0.821632	0.631963	1.11764	0.954226	0.788385	0.950525	0.621304	1.03156	0.461648	1.23942	0.5445	1.03235	0.781857
				3.98435	1.28363	0.661356	0.908787	0.284394	0.832156	0.331794	0.914707	-0.0161998	1.32831	0.307886	0.494565	0.444179	0.794576	0.457688	1.5237	0.124717	1.01005	0.324477			1.32007	0.952388	1.34076	1.00356	1.2022	0.838131	0.711819	1.19263	0.991017	0.853428	1.00426	0.625779	1.10016	0.564338	1.21638	0.507127	1.11083	0.817172
				4.02767	1.30143	0.737311	0.880837	0.322265	0.923548	0.343034	0.996147	-0.079953	1.36197	0.295359	0.534524	0.402827	0.809329	0.42596	1.66085	0.1467	1.05858	0.324188			1.35144	0.920818	1.48015	0.998271	1.30099	0.853238	0.814513	1.16779	1.06341	0.875749	0.999876	0.654844	1.13343	0.682251	1.25015	0.441814	1.17424	0.824347
				4.07099	1.22967	0.759346	0.786446	0.269142	0.959518	0.199623	0.934505	0.0512806	1.35402	0.276677	0.459026	0.373278	0.801339	0.437004	1.79868	0.204639	1.0404	0.321374			1.38294	0.834469	1.55034	0.853087	1.33523	0.765635	0.867771	1.04867	1.16886	0.840351	0.994154	0.551736	1.12386	0.735336	1.36682	0.483579	1.22375	0.764108
				4.11431	1.15203	0.898191	0.732566	0.154385	0.88064	0.0834105	1.04173	0.100203	1.25892	0.29037	0.601943	0.315447	0.781054	0.307346	1.76662	0.190451	1.02694	0.292475			1.35346	0.679015	1.62177	0.770544	1.36392	0.69431	0.939755	0.952014	1.19056	0.82338	1.03015	0.597664	1.07251	0.698934	1.35131	0.404966	1.24043	0.702603
				4.15763	1.02645	0.973109	0.551279	0.100186	0.658291	0.216044	1.03862	0.214575	1.21797	0.271204	0.5632	0.279001	0.628044	0.20599	1.56321	0.220173	0.905884	0.310035			1.35603	0.612347	1.58973	0.73183	1.34183	0.5198	0.893331	0.862515	1.119	0.82293	1.023	0.537598	0.987787	0.683423	1.35763	0.35962	1.20854	0.641258
				4.20095	0.961644	0.832235	0.49411	0.0441968	0.439249	0.17474	0.791858	0.33939	1.20153	0.310627	0.534496	0.277677	0.477951	0.199997	1.47999	0.266106	0.797603	0.305621			1.25815	0.56062	1.46534	0.715635	1.30115	0.470184	0.832314	0.746224	1.04996	0.732867	1.05061	0.496583	0.92946	0.614648	1.2062	0.293186	1.13665	0.578743
				4.24427	0.838379	0.859744	0.535328	0.0193705	0.42534	0.213974	0.56985	0.397092	1.05204	0.304578	0.532589	0.219319	0.371872	0.13956	1.18511	0.301395	0.688814	0.306879			1.15338	0.516918	1.35281	0.701592	1.22985	0.401098	0.848248	0.698622	0.940254	0.664674	1.05233	0.491455	0.779535	0.568829	1.17011	0.191526	1.06581	0.529339
				4.28759	0.779116	0.861002	0.596898	0.0942358	0.35591	0.231782	0.622468	0.459267	0.939769	0.327621	0.524511	0.191527	0.349571	0.110762	0.990356	0.301593	0.644825	0.322224			1.02685	0.454901	1.33621	0.69166	1.15292	0.36229	0.859683	0.625261	0.930612	0.682602	1.06006	0.448298	0.757715	0.490452	1.16391	0.178643	1.03599	0.491763
				4.33091	0.631141	0.810657	0.613666	0.120698	0.263955	0.289382	0.489497	0.660111	0.8634	0.364208	0.502603	0.176176	0.286282	0.0799708	1.05745	0.172706	0.588499	0.334239			0.98514	0.384583	1.16211	0.647478	1.01956	0.366725	0.858538	0.536687	0.763847	0.614268	0.999471	0.450699	0.666782	0.457225	1.15358	0.15755	0.951128	0.451902
				4.37423	0.489712	0.732204	0.504486	0.134944	0.211379	0.281338	0.51813	0.695359	0.752305	0.262497	0.552889	0.133892	0.45259	0.0447157	1.02843	0.0723447	0.56374	0.294662			0.898264	0.308517	0.979739	0.615741	0.8195	0.393705	0.784037	0.462952	0.696427	0.528207	0.859214	0.428384	0.540002	0.445121	1.03179	0.0916275	0.826121	0.409282
				4.41755	0.483939	0.756571	0.504212	0.219196	0.219659	0.35906	0.376645	0.680267	0.599581	0.279269	0.441943	0.0640578	0.504817	0.0250777	0.807853	0.116764	0.492331	0.312533			0.77712	0.323463	0.864974	0.549244	0.690842	0.492237	0.729346	0.394715	0.659642	0.597559	0.776777	0.427445	0.432256	0.422311	1.02625	0.0418604	0.74465	0.406104
				4.46087	0.37184	0.697198	0.363169	0.315303	0.281924	0.28752	0.190789	0.646752	0.632476	0.305605	0.475529	0.142402	0.424186	0.0628245	0.6301	0.129134	0.421252	0.323342			0.678613	0.276023	0.778902	0.534109	0.613683	0.541681	0.62459	0.35712	0.615248	0.598755	0.705838	0.445423	0.327585	0.346915	0.908718	0.0513301	0.656647	0.393919
				4.50419	0.359907	0.731595	0.405469	0.318975	0.151922	0.210213	0.384186	0.592647	0.678833	0.350899	0.440763	0.0601903	0.250892	-0.000665854	0.43625	0.0505853	0.388528	0.289305			0.593695	0.27416	0.712647	0.562246	0.455676	0.463108	0.643668	0.271898	0.494677	0.538443	0.567544	0.493717	0.192549	0.312412	0.88594	0.0586414	0.568299	0.371828
				4.54751	0.329527	0.684701	0.400518	0.336031	0.164221	0.157213	0.386797	0.516788	0.630349	0.374649	0.352596	0.0900688	0.282685	-0.147287	0.543501	0.0595532	0.386274	0.258965			0.5284	0.206304	0.648586	0.491665	0.450393	0.504996	0.549256	0.308156	0.419507	0.473349	0.513361	0.550252	0.175441	0.272377	0.811694	0.0157025	0.51208	0.35285
				4.59083	0.323641	0.669952	0.397104	0.272771	0.169704	0.0417201	0.383653	0.441751	0.587704	0.425745	0.342781	0.0257051	0.31127	-0.167952	0.432941	0.0799951	0.3686	0.223711			0.534904	0.141411	0.631195	0.469369	0.428335	0.492102	0.450225	0.269068	0.364881	0.529788	0.479938	0.616623	0.16074	0.28156	0.668704	9.47262e-05	0.464865	0.350002
				4.63415	0.344529	0.677592	0.321799	0.186475	0.246345	-0.00814056	0.358095	0.314324	0.55883	0.453231	0.122665	-0.0555333	0.213036	-0.165874	0.524567	0.137713	0.336233	0.192473			0.516132	0.119949	0.575628	0.483688	0.402226	0.523719	0.415285	0.218444	0.346539	0.455313	0.409491	0.649846	0.209252	0.222388	0.607814	0.00739819	0.435296	0.335093
				4.67747	0.415234	0.701789	0.271311	0.127044	0.116517	0.0884408	0.418314	0.207572	0.521285	0.388105	0.0495225	0.00886047	0.160876	-0.269885	0.379078	0.241942	0.291517	0.186734			0.472283	0.145513	0.522988	0.411007	0.34842	0.541131	0.312801	0.228216	0.341734	0.391874	0.37605	0.665209	0.165412	0.233962	0.448967	0.0354079	0.373582	0.33154
				4.72079	0.387331	0.7026	0.189361	0.217717	0.211996	0.0653559	0.420201	0.0322053	0.488608	0.406875	-0.0185946	0.00603031	0.0647477	-0.250952	0.435483	0.259708	0.272392	0.179943			0.402469	0.182784	0.524612	0.373423	0.254298	0.509161	0.250723	0.254312	0.322545	0.426356	0.312348	0.606099	0.0874913	0.258486	0.416328	0.0770539	0.321352	0.335959
				4.76411	0.375743	0.570142	0.174792	0.154565	0.275832	0.0512536	0.487659	0.0740114	0.345495	0.399772	-0.10347	-0.0316377	0.155148	-0.258646	0.155137	0.306637	0.233292	0.158262			0.319728	0.215644	0.442861	0.361877	0.197973	0.486953	0.16646	0.261017	0.292215	0.439214	0.261059	0.540829	0.060101	0.326284	0.289094	0.0728727	0.253686	0.338086
				4.80743	0.291173	0.573716	0.0416777	0.0521705	0.25794	-0.0258639	0.460472	-0.0740984	0.339719	0.357206	-0.108008	-0.126394	0.0831441	-0.32933	0.23182	0.17048	0.199742	0.0747359			0.348984	0.159614	0.399207	0.294598	0.160432	0.448354	0.126319	0.258944	0.317563	0.371155	0.262963	0.524038	0.0640886	0.370874	0.348852	0.0678325	0.253551	0.311926
				4.85075	0.302315	0.605175	-0.118548	0.029805	0.238777	-0.090999	0.30617	0.0595754	0.301268	0.388269	-0.106003	-0.146013	0.0406662	-0.257831	0.161853	0.131516	0.140812	0.0899371			0.340945	0.15683	0.384142	0.252864	0.132242	0.364737	0.0841404	0.290833	0.359932	0.393198	0.267396	0.436187	0.0680841	0.352398	0.351272	0.102443	0.248519	0.293686
				4.89407	0.290413	0.532446	-0.121056	0.0130481	0.135631	-0.06644	0.38775	-0.00703871	0.270861	0.402477	-0.0324815	-0.157796	0.07482	-0.272805	0.213815	0.0435947	0.152469	0.0609358			0.339399	0.233711	0.363195	0.294823	0.150056	0.364317	0.0212933	0.313445	0.338033	0.412927	0.273006	0.423269	0.130144	0.277801	0.336003	0.0780208	0.243891	0.299789
				4.93739	0.304988	0.429882	-0.195491	0.0714823	0.000997139	-0.0802974	0.3233	0.0768908	0.240556	0.415771	-0.0106085	-0.156455	-0.109321	-0.324097	0.13532	0.0729745	0.0862175	0.0632689			0.381436	0.260667	0.269738	0.326629	0.186883	0.292126	0.00676944	0.367508	0.299287	0.420569	0.271417	0.370057	0.148711	0.23334	0.39341	0.0715337	0.244707	0.292804
				4.98071	0.268266	0.27519	-0.0438357	0.0653413	-0.0476864	-0.0724636	0.172766	0.0773466	0.168387	0.38686	0.0819825	-0.140012	-0.0908881	-0.206926	0.149925	0.127278	0.0823645	0.0640767			0.333426	0.288765	0.218561	0.378718	0.204124	0.340698	0.0129148	0.358756	0.255888	0.329407	0.318548	0.308054	0.17525	0.183227	0.337071	0.0529044	0.231973	0.280066
				5.02403	0.166088	0.392387	-0.0235664	0.120246	0.0845382	-0.138082	0.0716108	0.1047	0.0835004	0.350386	0.198308	-0.168911	-0.115052	-0.161082	0.214123	-0.00876408	0.0849438	0.0613599			0.258215	0.265153	0.277072	0.342422	0.2135	0.262303	0.0394873	0.361567	0.204989	0.345129	0.299158	0.277497	0.115038	0.134949	0.390438	0.00478757	0.224737	0.249226
				5.06735	0.187755	0.336323	0.000322344	0.141996	0.0878157	-0.121223	0.0756384	0.170846	0.118814	0.331662	0.139564	-0.155851	-0.158889	-0.169767	0.294191	0.0511434	0.0931516	0.0731411			0.174587	0.238458	0.228402	0.354025	0.145953	0.243411	0.0160565	0.352997	0.187293	0.289468	0.316469	0.199872	0.147236	0.12493	0.407175	0.0720921	0.202896	0.234407
				5.11067	0.134454	0.218579	0.0597615	0.158926	0.0760656	-0.180704	-0.0590882	0.173249	-0.0133713	0.298645	0.240531	-0.1875	0.000307071	-0.179194	0.422357	0.0991925	0.107627	0.0501492			0.206334	0.241507	0.18046	0.345339	0.16177	0.24765	-0.0207108	0.327206	0.119592	0.238344	0.264079	0.187547	0.167219	0.111325	0.477614	0.06453	0.194545	0.220431
				5.15399	0.0902321	0.168701	0.106218	0.139394	0.144118	-0.194244	-0.0667112	0.109901	-0.0692413	0.313685	0.227427	-0.110083	0.0590228	-0.199311	0.362709	0.133294	0.106722	0.045167			0.241191	0.232501	0.184502	0.309594	0.14778	0.224317	-0.0436601	0.342137	0.0875395	0.281771	0.232089	0.18478	0.147144	0.0554227	0.443038	0.0762571	0.179953	0.213347
				5.19731	0.0322452	0.106575	0.0760425	0.197694	0.110297	-0.208807	-0.177205	0.119845	-0.13888	0.329358	0.294813	-0.103471	0.00732789	-0.189396	0.393141	0.165444	0.0747227	0.0521552			0.233497	0.214483	0.223069	0.284072	0.146622	0.212902	-0.0511577	0.328811	0.0908593	0.35855	0.225769	0.165539	0.0810421	0.0217116	0.430256	0.107291	0.172495	0.21167
				5.24063	-0.0206741	-0.0154695	0.041286	0.255602	0.203537	-0.372791	-0.0704186	0.104535	-0.0315879	0.213474	0.458296	-0.0574365	-0.0251138	-0.066268	0.427544	0.0789604	0.122859	0.0175758			0.240722	0.177222	0.226445	0.25021	0.131423	0.156704	-0.0415951	0.282263	0.0616133	0.314686	0.172294	0.138703	0.109249	-0.0136469	0.403846	0.121272	0.163	0.178427
				5.28395	0.0390821	0.0511759	0.125823	0.128017	0.173628	-0.411188	0.0191487	0.0145546	0.00875547	0.150606	0.438904	-0.111224	-0.102294	0.0156701	0.401229	0.0476728	0.138034	-0.0143394			0.193783	0.178508	0.239622	0.162932	0.100939	0.183026	0.00146474	0.23657	0.0491814	0.297487	0.113389	0.13669	0.135396	-0.076551	0.391035	0.0846413	0.153101	0.150413
				5.32727	0.0453928	0.0100423	0.0874207	0.117645	0.212337	-0.475242	-0.0192181	0.0302442	0.024484	0.134586	0.445743	-0.0135757	-0.0446565	-0.0157583	0.325658	0.0758651	0.134645	-0.0170243			0.221675	0.212013	0.245264	0.0949677	0.114118	0.223885	-0.0436987	0.187025	0.0911999	0.305175	0.0588059	0.164434	0.207218	-0.0471219	0.368665	0.061069	0.157906	0.150181
				5.37059	0.078995	-0.0371036	0.124496	0.0429391	0.149601	-0.500773	-0.117019	0.015021	0.0771673	0.0568147	0.391324	-0.0561192	-0.0341406	0.138172	0.253381	0.0852658	0.115476	-0.0319729			0.180526	0.24028	0.275978	0.101337	0.0895649	0.245652	-0.0167039	0.0817787	0.0759603	0.315206	-0.0235317	0.124833	0.18585	0.00752232	0.280326	0.050965	0.130996	0.145947
				5.41391	-0.00132354	-0.0749752	0.106086	-0.0145531	0.100512	-0.464878	-0.0642678	-0.0296815	0.0521333	-0.00683337	0.280733	-0.0119333	0.0226507	0.173317	0.333824	0.0237663	0.103793	-0.0507214			0.124227	0.18877	0.272839	0.0918993	0.0855461	0.240311	0.0392578	0.0643742	0.107536	0.204387	-0.0375537	0.0844149	0.158843	-0.0178383	0.348481	0.0875775	0.137397	0.117987
				5.45723	-0.0485219	-0.121996	0.0852975	0.005356	0.0326354	-0.358532	0.00493219	-0.0491218	-0.0157869	-0.0551492	0.209174	0.0896467	0.0954036	0.146852	0.0950782	-0.0184685	0.0572766	-0.0451766			0.137789	0.262306	0.284188	0.0276737	0.0635144	0.185141	0.0742755	0.0565887	0.11902	0.188857	-0.0243886	0.0774905	0.152788	0.0676138	0.351945	0.0615017	0.144891	0.115897
				5.50055	-0.207133	-0.141083	0.0748686	-0.0471213	0.054453	-0.234649	-0.0365121	-0.0996085	0.0384846	-0.00307945	0.191345	0.134897	0.128262	0.119363	-0.0484478	-0.157825	0.0244151	-0.0536382			0.111008	0.237603	0.267715	-0.00135034	0.034111	0.124193	0.09966	0.0196076	0.120099	0.146552	-0.02301	0.055604	0.112699	0.105151	0.341793	0.0686597	0.133009	0.0945025
				5.54387	-0.209231	-0.0727409	0.0478801	-0.0936763	0.0360756	-0.127602	-0.00680982	0.0624427	0.0549874	-0.0355486	0.0624383	0.158634	0.0820064	0.0965389	-0.298885	-0.277556	-0.0289423	-0.0361886			0.140098	0.265423	0.237022	0.00652939	-0.00577297	0.142603	0.0886519	0.00293852	0.0657049	0.125481	-0.0143005	0.062394	0.140569	0.103489	0.289394	-0.0291302	0.117671	0.084966
				5.58719	-0.190071	-0.0321741	0.0114006	-0.167592	-0.0758038	0.00663842	-0.0281405	0.0310625	0.200997	-0.072897	0.0574337	0.112472	0.0093507	0.0561453	-0.172091	-0.35115	-0.0233655	-0.0521868			0.21891	0.209907	0.266306	0.0316229	-0.0146965	0.118105	0.102951	0.0444293	0.0491	0.0945088	-0.0658616	0.0299469	0.10849	0.0918185	0.315806	-0.0490978	0.122626	0.071405
				5.63051	-0.15441	-0.0306937	-0.0443688	-0.117543	-0.162048	0.100884	-0.0934072	0.151119	0.21699	-0.107083	0.0618959	0.0548862	0.073652	0.139482	-0.0213195	-0.39951	-0.0153769	-0.0260572			0.15995	0.286617	0.21977	0.0287776	0.0164091	0.0814823	0.115072	0.0435679	0.0864231	0.0666016	-0.13907	0.00122818	0.0960423	0.0924679	0.285485	-0.00986439	0.10501	0.0738598
				5.67383	-0.107682	-0.020409	-0.0196242	-0.0639983	-0.291108	0.164968	-0.00355998	0.217494	0.313821	-0.0687622	0.0379222	0.00771286	0.0958287	0.0989015	0.0358989	-0.441456	0.007687	-0.0131937			0.16539	0.352412	0.152638	-0.0332959	-0.00115805	0.0536258	0.155404	0.0850648	0.0127107	0.106623	-0.224027	-7.3979e-05	0.150478	0.103694	0.28844	-0.0200915	0.0874844	0.0809948
				5.71715	-0.0565303	0.0494301	-0.0983598	0.0238264	-0.347462	0.1075	-0.0101195	0.320717	0.263362	-0.0747141	0.0510501	-0.0845351	-0.0162842	-0.0526049	0.0805102	-0.26941	-0.0167292	0.00252614			0.189513	0.308188	0.0999824	0.0567333	0.0344234	0.0503333	0.162748	0.166639	-0.0111065	0.0670641	-0.201484	0.0151872	0.0857377	0.107424	0.300097	-0.00582469	0.0824889	0.095718
				5.76047	-0.0461194	0.04994	0.0138069	0.0739703	-0.347441	0.167062	-0.0891528	0.339222	0.242877	-0.0685209	-0.0217968	-0.0571934	0.024373	0.0217977	0.216789	-0.236888	-0.000832951	0.0361737			0.172872	0.277806	0.115704	0.117812	0.0155632	0.0276877	0.170041	0.167385	0.0138681	0.042583	-0.142773	0.00713187	0.0171059	0.0722079	0.241609	-0.0610588	0.0754987	0.0814444
				5.80379	0.000811822	0.243021	-0.0117349	0.124631	-0.301959	0.164482	-0.0667944	0.332385	0.297509	-0.0540649	-0.0452516	-0.0258765	0.0739275	-0.101011	0.325188	-0.283283	0.0339621	0.0500356			0.0962923	0.289311	0.114818	0.137933	0.0209354	-0.0382628	0.160658	0.185642	0.00681618	0.0327935	-0.101859	0.0543974	-0.0140874	0.0340228	0.208924	-0.045521	0.0615621	0.0812895
				5.84711	0.0832705	0.195667	0.0317668	0.0245109	-0.24133	0.143623	0.0339405	0.330024	0.31514	-0.00494493	-0.174097	0.0628559	0.0306973	-0.197437	0.341194	-0.0891341	0.0525726	0.0581456			0.12096	0.296939	0.0479877	0.195886	-0.0266759	0.0055563	0.118284	0.23732	0.0428398	0.0197813	-0.0328751	0.116284	0.00906441	0.0376382	0.212831	0.0203258	0.061552	0.116216
				5.89043	0.0889074	0.237625	0.0243428	0.0694939	-0.230913	0.114176	-0.0345239	0.186565	0.162718	0.0296455	-0.106957	0.113879	0.0714389	-0.29434	0.410404	-0.00525913	0.0481771	0.0564732			0.170533	0.260032	0.0485974	0.228171	0.0491123	1.30374e-05	0.0747082	0.252189	0.00720668	0.0874908	0.018904	0.167943	0.00225651	-0.00428697	0.209712	-0.00752079	0.0726287	0.123004
				5.93375	0.057507	0.33143	0.0119	0.0464731	-0.212855	0.085252	-0.0248648	0.258976	0.168309	0.0853784	-0.17278	0.154536	-0.0669546	-0.355687	0.282934	-0.00194381	0.00539943	0.0755519			0.183772	0.239291	-0.015528	0.192484	0.0377297	0.00930489	0.0767562	0.230642	0.0486323	0.0884324	0.0750718	0.222778	-0.0123728	-0.0432228	0.174553	0.032159	0.0710768	0.121484
				5.97707	0.0438557	0.323505	-0.0858783	0.0882399	-0.203698	-0.0643194	-0.0432568	0.182355	0.126165	0.0789669	-0.120644	0.108825	-0.134821	-0.371059	0.427932	0.0218645	0.00120679	0.0460472			0.163805	0.200954	0.0418534	0.183186	0.0304518	0.0342699	0.0841447	0.236151	0.129044	0.120223	0.140759	0.175467	-0.0359125	-0.0686942	0.144623	-0.00931396	0.087346	0.10903
				6.02039	0.0473005	0.307947	-0.168341	0.124103	-0.190589	-0.1754	-0.124919	0.111795	0.129472	0.0463306	-0.17509	0.125217	-0.28024	-0.355374	0.433354	0.00623168	-0.0411317	0.0238563			0.149429	0.169961	0.0185091	0.157895	0.000399313	0.0527901	0.0677738	0.223198	0.155405	0.113206	0.137893	0.183162	0.0801608	-0.0607471	0.136126	-0.0381185	0.0932118	0.100168
				6.06371	-0.0500252	0.382119	-0.105897	0.0544866	-0.150384	-0.258834	-0.189237	0.110014	0.0827635	0.0201832	-0.22071	0.0761495	-0.228864	-0.416315	0.416026	-0.0302532	-0.055791	-0.00780638			0.126414	0.17072	0.0191586	0.140818	-0.0104288	0.0607628	0.0608339	0.21506	0.230471	0.0971603	0.119379	0.213983	0.155529	-0.0823869	0.0535497	-0.0531192	0.0943633	0.0953747
				6.10703	-0.0552711	0.349809	-0.187356	0.136219	-0.175946	-0.277183	-0.192484	0.0987849	0.0756404	0.0665827	-0.234349	0.107134	-0.299389	-0.499309	0.402076	-0.0958176	-0.0833849	-0.0142225			0.132618	0.177439	0.0256658	0.143273	-0.0252446	0.0608259	0.0333153	0.179565	0.236769	0.105464	0.123867	0.184931	0.183477	-0.04628	0.0841613	-0.0892897	0.0993287	0.0894911
				6.15035	-0.0843157	0.322392	-0.120036	0.128374	-0.134456	-0.325864	-0.0632771	0.017608	0.0332939	0.0736881	-0.26164	0.0794506	-0.187153	-0.419314	0.485843	-0.110354	-0.0414677	-0.0292526			0.0852657	0.172417	0.0540581	0.0921311	-0.00907143	0.090388	0.0962678	0.198294	0.269228	0.10499	0.154973	0.138995	0.147016	-0.0830031	0.0530487	-0.101436	0.106348	0.0765969
				6.19367	-0.151384	0.364433	-0.08013	0.14309	-0.0867886	-0.273056	0.0851606	0.110638	0.00483105	0.114867	-0.26559	0.108351	-0.133845	-0.443339	0.412171	-0.239394	-0.026947	-0.0143011			0.0859371	0.16779	0.00944979	0.0262293	0.00792892	0.0706219	0.100146	0.224471	0.239418	0.0608233	0.197246	0.211039	0.176374	-0.0872012	0.0854983	-0.0403235	0.11275	0.0791813
				6.23699	-0.174195	0.340651	-0.0900568	0.168861	-0.0849601	-0.154098	0.0603986	-0.00446297	-0.0869794	0.0742816	-0.283801	0.189089	-0.0509271	-0.439784	0.387615	-0.271152	-0.0403632	-0.0120767			0.151359	0.163606	0.0175732	-0.00901769	0.0175518	0.0564462	0.0612101	0.258905	0.182331	0.0838718	0.224724	0.217343	0.216742	-0.0488661	0.0425728	-0.0925307	0.114258	0.0787196
				6.28031	-0.234298	0.228119	-0.0819552	0.0430329	-0.0517296	-0.0316219	0.20075	0.0508181	-0.0412872	0.0765891	-0.277966	0.190245	-0.105746	-0.443675	0.497374	-0.401285	-0.0118572	-0.0359722			0.138799	0.121666	0.0258151	-0.00202911	-0.0193677	0.0548148	0.0397032	0.296039	0.15909	0.0994008	0.227762	0.208518	0.234854	-0.0654792	0.0142619	-0.0965839	0.102615	0.0770434
				6.32363	-0.154345	0.299692	-0.0350944	0.111438	-0.0349351	0.0340835	0.291071	0.211632	-0.0258793	0.0203658	-0.239488	0.14375	-0.0760868	-0.49322	0.566728	-0.426728	0.0364962	-0.0123733			0.0957442	0.136789	0.025071	-0.0362933	-0.0295122	-0.00537079	0.039868	0.276034	0.0702059	0.0799527	0.191844	0.143737	0.273867	-0.08027	0.0141317	-0.12508	0.0851525	0.0486874
				6.36695	-0.141567	0.116286	-0.00483012	0.102217	-0.0509604	0.0779352	0.260484	0.229425	-0.0480619	0.00860345	-0.230123	0.0856964	-0.0046364	-0.462054	0.710644	-0.389065	0.0613686	-0.0288695			0.10925	0.048315	0.0375902	-0.0794578	0.00545306	-0.0579968	0.0758044	0.329217	0.0894306	0.0460888	0.120692	0.0877222	0.2452	-0.110102	0.0160701	-0.136037	0.0874363	0.0159687
				6.41027	-0.163329	0.0880378	-0.103285	0.0600492	-0.055652	0.0344612	0.289082	0.342516	-0.163993	0.0243204	-0.155225	-0.0807266	0.0874935	-0.44614	0.841937	-0.386552	0.0721285	-0.0455042			0.0796575	0.0702254	-0.00204047	-0.113669	0.0313891	-0.0582643	0.0690083	0.334033	0.0473296	-0.00336269	0.0769612	0.045565	0.274484	-0.0400252	0.0234051	-0.084885	0.0750243	0.0187022
				6.45359	-0.154868	0.0814812	-0.103083	0.0669078	-0.0975799	0.0918965	0.301126	0.34574	-0.0744461	0.0241978	-0.155891	-0.0409105	0.112129	-0.452791	0.727693	-0.404202	0.0693851	-0.03596			0.0634585	0.0823385	-0.026438	-0.20473	-0.0142778	-0.0907184	0.121852	0.384281	-0.0369106	0.064465	0.0107006	0.081365	0.333476	0.0119898	-0.00100334	-0.111309	0.0563572	0.0272101

## Sheet: Figure 8E
DSI Histogram Source Data
Control (DSI)	SAC Ablation (DSI)
0.408668	0.142311
0.520739	0.374691
0.429529	0.201517
0.299763	0.242937
0.255137	0.116651
0.218643	0.0805866
0.296758	0.0135438
0.548531	0.337121
0.369034	0.0337085
0.602416	0.215677
0.342754	0.0429246
0.515547	0.353306
0.50558	0.184876
0.198685	0.0331962
0.457697	0.120437
0.547512	0.113311
0.465196	0.00360054
0.194585	0.350127
0.56698	0.0781467
0.523828	0.106187
0.526498	0.177131
0.494343	0.00371566
0.566402	0.113259
0.551777	0.385639
0.046726	0.419958
0.266744	0.146834
0.462855	0.232939
0.682967	0.107707
0.508856	0.027794
0.484059	0.373744
0.182953	0.214261
0.311674	0.25064
0.301557	0.307531
0.305129	0.0181257
0.561168	0.15195
0.278612	0.345902
0.436908	0.212601
0.371652	0.285377
0.535358	0.210453
0.332438	0.214147
0.215153	0.259289
0.127457	0.108727
0.500246	0.0781648
0.207118	0.00554863
0.0601658	0.321494
0.28724	0.0639872
0.0743896	0.150071
0.37801	0.246327
0.00156305	0.0580322
0.215207	0.246863
0.368619	0.0619295
0.370326	0.0974309
0.750373	0.355703
0.285082	0.342561
0.134713	0.231663
0.109972	0.0382437
0.280619	0.21801
0.40939	0.010671
0.420024	0.00217235
0.27485	0.0441469
0.205241	0.0699181
0.382695	0.107133
0.26024	0.0824488
0.578263	0.156854
0.385136	0.22312
0.0900045	0.243119
0.261415	0.0996414
0.0314898	0.526083
0.644418	0.0465614
0.430217	0.552976
0.202255	0.193626
0.359949	0.273284
0.0990523	0.264003
0.19376	0.348571
0.010272	0.064987
0.0326409	0.0280936
0.378144	0.0726235
0.327619	0.0828456
0.499215	0.0844843
0.415447	0.0986761
0.0463826	0.00328519
0.272504	0.922298
0.223303	0.0393887
0.365131	0.0788615
0.195421	0.0861715
0.119009	0.139222
0.4618	0.11483
0.0289561	0.0802235
0.42727	0.0508315
0.0583525	0.0426083
0.14149	0.0711406
0.245748	0.155781
0.197213	0.137347
0.140412	0.395383
0.354641	0.118646
0.0859908	0.249267
0.262067	0.493701
0.192323	0.170018
0.124457	0.41246
0.202129	0.0979414
0.155326	0.6245
0.12594	0.121255
0.205544	0.258498
0.210373	0.219082
0.449699	0.251608
0.355788	0.143171
0.0854545	0.321991
0.250557	0.167779
0.488453	0.215743
0.284046	0.197719
0.217411	0.103598
0.358202	0.153231
0.241097	0.2525
0.405403	0.326813
0.75188	0.121608
0.239431	0.123052
0.666944	0.375322
0.544254	0.312781
0.65077	0.186732
0.449041	0.0308366
0.375278	0.118611
0.707312	0.0763277
0.223432	0.284929
0.194164	0.344805
0.438666	0.335452
0.620799	0.258161
0.391706	0.284125
0.231534	0.0561804
0.131928	0.212791
0.327866	0.227446
0.420108	0.200511
0.32019	0.0891299
0.40892	0.0993151
0.436122	0.217682
0.216067	0.322752
0.393199	0.117646
0.515916	0.295361
0.117231	0.0472445
0.273294	0.226294
0.203797	0.24713
0.0377632	0.238653
0.124726	0.201129
0.160632	0.258102
0.362141	0.0744668
0.11034	0.161048
0.263746	0.212213
0.17867	0.11594
0.472196	0.0713038
0.175497	0.148969
0.33145	0.121279
0.222137
0.314734
0.389059
0.19797
0.215903
0.0838872
0.468199
0.00897044
0.436779
0.208413
0.0347319
0.245084
0.296383
0.191563
0.232693
0.112569
0.392398
0.21884
0.172729
0.219654
0.280148
0.22069
0.0996002
0.152537
0.120557
0.178838
0.258376
0.0725329
0.067817
0.252079
0.270972
0.170431
0.144409
0.188977
0.0473729
0.115487
0.0730157
0.204257
0.10427
0.454601
0.470411
0.757591
0.395131
0.410956
0.512826
0.427716
0.280899
0.396483
0.175097
0.385616
0.37304
0.419465
0.367753
0.351008
0.283854
0.454832
0.31429
0.00478645
0.156185
0.0160297
0.206606
0.214661
0.131137
0.313888
0.106186
0.219495
0.557872
0.0184323
0.630005
0.5121
0.22251
0.0505472
0.414269
0.366483
0.334373
0.116419
0.556578
0.55873
0.0261073
0.329525
0.635279
0.439483
0.282152
0.403046
0.197855
0.314912
0.0938782
0.0859821
0.382231
0.335186
0.183545
0.304594
0.573457
0.155175
0.17674
0.520617
0.388465
0.394005
0.17111
0.326281
0.289647
0.711257
0.479078
0.29237
0.105188
0.238271
0.0320995
0.112356
0.447287
0.319705
0.290263
0.248882
0.0164776
0.568819
0.412092
0.285049
0.225499
0.606014
0.357456
0.301131
0.229407
0.683319
0.468118
0.506418
0.39007
0.693742
0.582407
0.470373
0.669683
0.270566
0.727518
0.534328
0.629607
0.436311
0.534352
0.415551
0.503582
0.506737
0.299274
0.630128
0.333894
0.393163
0.0331646
0.231631
0.368158
0.191592
0.377677
0.24772
0.270552
0.399066
0.576973
0.354377
0.563112
0.306641
0.476387
0.313836
0.430596
0.418022
0.148577
0.412743
0.511602
0.349094
0.454642
0.510331
0.531294
0.0764819
0.373933
0.241815
0.481347
0.498086
0.265874
0.262313
0.374307
0.430973
0.447513
0.508698
0.551033
0.665492
0.493044
0.258456
0.555878
0.371505
0.348484
0.424099
0.539709
0.179567
0.511247
0.621918
0.580396
0.632133
0.0133112
0.648252
0.413589
0.327046
0.346361
0.410641
0.19399
0.515762
0.378536
0.45978
0.558589
0.414492
0.449953

## Sheet: Figure 8F-G
ROI Positions		Color Map				ROI 1												ROI 2												ROI 3												ROI 4
X	Y	Control (DSI)	SAC Ablation (DSI)			Control						SAC Ablation						Control						SAC Ablation						Control						SAC Ablation						Control						SAC Ablation
0.00336477	0.000147769	0.181608	0.108727		Time	ND			PD			ND			PD			ND			PD			ND			PD			ND			PD			ND			PD			ND			PD			ND
0.00336902	0.000144813	0.913004	0.0781648		-0.0003415	Trial 1	Trial 2	Average	Trial 1	Trial 2	Average	Trial 1	Trial 2	Average	Trial 1	Trial 2	Average	Trial 1	Trial 2	Average	Trial 1	Trial 2	Average	Trial 1	Trial 2	Average	Trial 1	Trial 2	Average	Trial 1	Trial 2	Average	Trial 1	Trial 2	Average	Trial 1	Trial 2	Average	Trial 1	Trial 2	Average	Trial 1	Trial 2	Average	Trial 1	Trial 2	Average	Trial 1	Trial 2
0.00337316	0.000144529	0.349675	0.150071		0.0479165	0.0839341	-0.196431	-0.0562484	-0.122942	0.0162806	-0.0533305	-0.204132	0.503491	0.14968	0.0042395	-0.015211	-0.00548574	-0.0178389	-0.0454105	-0.0316247	-0.374852	-0.161066	-0.267959	-0.0368282	-0.331875	-0.184351	-0.21215	-0.0863479	-0.149249	0.226522	-0.0211229	0.1027	-0.12533	-0.26922	-0.197275	0.0623942	-0.144448	-0.0410268	0.145139	0.0144144	0.0797765	0.00213959	-0.138199	-0.0680298	0.0605403	-0.202926	-0.071193	-0.0653616	0.175216
0.00338027	0.00013915	0.255116	0.0382437		0.0961745	0.117328	-0.109491	0.00391859	-0.183272	0.0129934	-0.0851392	-0.280983	0.484694	0.101856	0.0138783	0.0459516	0.0299149	0.0153766	-0.0868511	-0.0357372	-0.40862	-0.144912	-0.276766	0.00844569	-0.301259	-0.146407	-0.0420552	-0.168455	-0.105255	0.22811	-0.0455912	0.0912594	-0.155142	-0.260104	-0.207623	0.129037	-0.108147	0.010445	0.199362	0.0637884	0.131575	-0.0159477	-0.139363	-0.0776556	7.64295e-05	-0.219697	-0.10981	-0.078754	0.164975
0.00337741	0.000142797	0.707127	0.0619295		0.144432	0.15087	-0.0930575	0.0289061	-0.165033	-0.0793903	-0.122211	-0.284461	0.469494	0.0925167	0.0164926	-0.0124139	0.00203935	-0.0312748	-0.0621563	-0.0467155	-0.325328	-0.178021	-0.251675	-0.0894951	-0.341883	-0.215689	0.0828749	-0.178439	-0.0477821	0.131234	-0.069377	0.0309282	-0.140384	-0.17359	-0.156987	0.121513	-0.0895311	0.0159907	0.185668	0.0568078	0.121238	-0.0259802	-0.149792	-0.0878862	8.25438e-05	-0.238144	-0.119031	-0.0542231	0.135854
0.00337751	0.000147769	0.646182	0.21801		0.19269	0.141783	-0.0386036	0.0515897	-0.132061	-0.117655	-0.124858	-0.250984	0.489309	0.119162	0.00654644	-0.0287986	-0.0111261	-0.00262265	-0.0569953	-0.029809	-0.270292	-0.136202	-0.203247	-0.0528474	-0.296463	-0.174655	0.131745	-0.205841	-0.0370479	0.186343	-0.0553146	0.0655143	-0.146031	-0.151883	-0.148957	0.114098	-0.0107537	0.0516721	0.139353	0.030764	0.0850583	-0.0957825	-0.127435	-0.111609	-0.0226262	-0.223734	-0.12318	-0.0741421	0.118955
0.00338176	0.000134993	0.235748	0.107133		0.240949	0.192586	0.0309	0.111743	-0.102883	-0.0425908	-0.0727371	-0.229304	0.447353	0.109024	-0.0218963	-0.0891349	-0.0555156	0.0412906	-0.147202	-0.0529555	-0.205251	-0.101751	-0.153501	-0.0263723	-0.222867	-0.12462	0.151756	-0.24069	-0.0444671	0.214498	-0.0784374	0.0680302	-0.147621	-0.154014	-0.150817	0.048763	-0.0298181	0.00947242	0.111978	-0.0210481	0.0454648	-0.10418	-0.0937124	-0.098946	-0.0446473	-0.209005	-0.126826	-0.110301	0.0492497
0.00338176	0.00014565	0.855576	0.156854		0.289206	0.251318	0.084815	0.168067	0.00603504	-0.0327466	-0.0133558	-0.215205	0.436867	0.110831	-0.0813562	-0.0770317	-0.0791939	0.10421	-0.146368	-0.0210792	-0.150912	-0.0509237	-0.100918	-0.021699	-0.112632	-0.0671656	0.135138	-0.255244	-0.0600534	0.178989	-0.0383119	0.0703385	-0.211975	-0.0575144	-0.134745	0.0693374	-7.97996e-05	0.0346288	0.0911283	0.00480733	0.0479678	-0.0569509	-0.0470964	-0.0520236	-0.0564455	-0.207949	-0.132197	-0.142261	-0.00675756
0.00338601	0.000130735	0.615357	0.243119		0.337465	0.257718	0.11349	0.185604	0.0393014	0.020289	0.0297952	-0.163235	0.319931	0.0783477	-0.0723194	-0.113031	-0.0926751	0.12782	-0.119494	0.00416334	-0.171239	0.0160475	-0.0775957	-0.0829642	0.0306738	-0.0261452	0.0527354	-0.150335	-0.0488	0.120738	-0.0290044	0.0458668	-0.193094	0.00709869	-0.0929975	0.0402986	-0.0179892	0.0111547	0.101484	-0.00239109	0.0495463	-0.0825253	0.0420738	-0.0202258	0.000221136	-0.194328	-0.0970535	-0.148978	-0.0326042
0.00338601	0.00014351	0.605695	0.0824488		0.385723	0.231023	0.242683	0.236853	0.045606	0.0528783	0.0492421	-0.170209	0.267266	0.0485286	-0.106782	-0.167144	-0.136963	0.16267	-0.0931068	0.0347814	-0.165721	0.0143733	-0.075674	-0.0224418	0.0239275	0.000742817	0.115334	-0.0751499	0.0200922	0.0644367	-0.0159837	0.0242265	-0.214444	0.0562533	-0.0790954	-0.00487216	0.00895827	0.00204306	0.114549	0.045698	0.0801236	-0.088485	0.0697096	-0.00938772	0.0551912	-0.0892696	-0.0170392	-0.121504	-0.122826
0.00339036	0.0001289	0.374488	0.552976		0.43398	0.134042	0.27046	0.202251	0.0528723	0.0275914	0.0402319	-0.196645	0.198137	0.000745937	-0.155568	-0.173446	-0.164507	0.190858	-0.14344	0.023709	-0.188397	0.0859283	-0.0512341	-0.0278473	0.0629508	0.0175517	0.13894	-0.049759	0.0445906	-0.0277981	-0.026774	-0.027286	-0.145456	0.150976	0.00275972	-0.0341137	-0.0661984	-0.050156	0.11948	0.0871726	0.103326	-0.10563	0.0810836	-0.0122732	0.0606233	-0.0592461	0.000688625	-0.100041	-0.122208
0.00339025	0.00014351	0.43993	0.0996414		0.482239	0.170836	0.338254	0.254545	0.0192381	0.114044	0.0666408	-0.192548	0.131007	-0.0307706	-0.144721	-0.195066	-0.169894	0.161772	-0.110193	0.0257897	-0.181246	0.105243	-0.0380014	0.0166007	0.121003	0.068802	0.114659	-0.0307351	0.0419621	-0.0184827	0.00440009	-0.00704133	-0.108607	0.203158	0.0472755	-0.00505415	0.0154194	0.0051826	0.0962288	0.103872	0.10005	-0.0625941	0.067668	0.00253694	0.0531075	-0.0468395	0.00313403	-0.0700534	-0.0638662
0.0033945	0.000127495	0.870118	0.264003		0.530497	0.186351	0.338324	0.262338	0.0350634	0.206666	0.120865	-0.152023	0.0128785	-0.0695723	-0.111231	-0.271938	-0.191585	0.172286	-0.0550126	0.0586369	-0.187778	0.133608	-0.0270848	-0.0705155	0.10223	0.0158575	0.0583579	-0.054775	0.00179142	-0.0345374	0.0306299	-0.00195376	-0.0968259	0.211123	0.0571486	0.0329503	0.0429599	0.0379551	0.0994098	0.172109	0.135759	-0.0975654	0.0564879	-0.0205388	0.0104181	-0.0391628	-0.0143723	-0.00505135	-0.0682664
0.0033945	0.00014351	0.483376	0.193626		0.578754	0.170067	0.359011	0.264539	0.0116948	0.259305	0.1355	-0.131155	-0.036058	-0.0836066	-0.105454	-0.277293	-0.191374	0.0997251	0.0607699	0.0802475	-0.18844	0.116364	-0.036038	-0.04465	0.0879188	0.0216344	0.0256575	-0.0820318	-0.0281872	-0.0381021	0.094675	0.0282864	-0.0560165	0.162055	0.0530194	0.0981049	0.0851517	0.0916283	0.0622096	0.136755	0.0994825	-0.0622408	0.011644	-0.0252984	0.00776039	-0.0668132	-0.0295264	-0.0174689	-0.041614
0.0033946	0.000148278	0.835831	0.526083		0.627012	0.196227	0.391091	0.293659	-0.105961	0.234723	0.0643809	-0.128593	-0.0513647	-0.089979	-0.02299	-0.20254	-0.112765	0.0400133	0.0656072	0.0528102	-0.196506	0.0989478	-0.0487791	-0.0796404	0.0170834	-0.0312785	0.0100499	-0.0670072	-0.0284787	-0.0656978	0.218428	0.076365	-0.014626	0.162251	0.0738125	0.13987	0.0556087	0.0977396	0.0626695	0.136747	0.0997083	0.00773831	-0.00128682	0.00322575	0.00792013	-0.019905	-0.00599244	-0.031095	-0.0169862
0.00339875	0.000125967	0.676404	0.0280936		0.67527	0.152104	0.400422	0.276263	-0.134564	0.225563	0.0454995	-0.153347	-0.0226287	-0.0879876	0.0248146	-0.26544	-0.120313	0.078384	0.105585	0.0919843	-0.206523	0.0239794	-0.0912717	-0.0465796	-0.0299303	-0.0382549	-0.0432749	-0.0675865	-0.0554307	-0.0847659	0.26657	0.0909022	-0.0571067	0.0953931	0.0191432	0.118639	0.162468	0.140553	0.0802916	0.138518	0.109405	0.0415457	-0.0125907	0.0144775	0.0910142	0.125016	0.108015	0.00191789	-0.0257914
0.00339875	0.00014351	0.678133	0.0726235		0.723529	0.182362	0.382622	0.282492	-0.148598	0.162548	0.00697481	-0.133325	-0.0568639	-0.0950945	0.0776773	-0.27152	-0.0969214	0.101963	0.145851	0.123907	-0.227205	0.0837767	-0.0717141	-0.100548	-0.0916728	-0.0961105	-0.0435925	-0.00775407	-0.0256733	-0.122977	0.289543	0.083283	-0.0341991	0.0335393	-0.000329895	0.107737	0.183209	0.145473	0.0861038	0.131282	0.108693	0.0313652	0.00347663	0.0174209	0.118374	0.18371	0.151042	0.0436238	0.030833
0.00339885	0.000148482	0.728638	0.348571		0.771787	0.212644	0.339006	0.275825	-0.0546332	0.124873	0.03512	-0.136573	-0.113866	-0.12522	0.0804118	-0.251945	-0.0857664	0.129137	0.208796	0.168967	-0.279953	0.116049	-0.0819518	-0.1676	-0.140559	-0.154079	-0.00925216	0.00601589	-0.00161813	-0.170727	0.312015	0.0706443	-0.0533542	0.0476614	-0.00284642	0.0998688	0.207841	0.153855	0.0345529	0.206711	0.120632	0.110145	0.0262269	0.0681861	0.115354	0.186421	0.150887	0.0481875	0.0316341
0.003403	0.000122218	0.44996	0.0986761		0.820044	0.22671	0.379098	0.302904	0.0547572	0.14282	0.0987886	-0.130355	-0.153311	-0.141833	0.132012	-0.227035	-0.0475117	0.158067	0.146817	0.152442	-0.266783	0.150397	-0.0581929	-0.181367	-0.128245	-0.154806	-0.0683113	0.0612624	-0.00352447	-0.258382	0.2698	0.00570914	-0.086035	0.0583143	-0.0138603	0.0314164	0.223013	0.127215	0.0242826	0.20285	0.113567	0.091822	0.0744267	0.0831243	0.104634	0.1968	0.150717	0.0231609	0.0228622
0.00340351	0.00014351	0.252903	0.0393887		0.868302	0.21438	0.301749	0.258064	0.130028	0.11366	0.121844	-0.0891773	-0.0337498	-0.0614635	0.0888643	-0.155386	-0.0332608	0.281873	0.129237	0.205555	-0.32852	0.189214	-0.0696531	-0.169626	-0.172388	-0.171007	-0.0585545	0.151324	0.0463848	-0.196613	0.217093	0.0102398	-0.160248	0.0306089	-0.0648195	-0.0298993	0.266519	0.11831	-0.00344352	0.198472	0.0975144	0.0675239	0.0800525	0.0737882	0.0918993	0.151552	0.121726	-0.0552132	0.0181979
0.003403	0.000148686	0.632463	0.0828456		0.916561	0.251435	0.286855	0.269145	0.190403	0.0705621	0.130482	-0.10983	0.00940712	-0.0502113	0.0756978	-0.149821	-0.0370616	0.260293	0.0903503	0.175322	-0.232652	0.200122	-0.0162651	-0.255924	-0.0886051	-0.172264	0.0313862	0.183901	0.107644	-0.217009	0.227527	0.00525896	-0.194599	0.0130366	-0.0907811	-0.119735	0.222701	0.0514831	-0.0745229	0.15277	0.0391238	0.032369	0.0902367	0.0613029	0.0810891	0.143149	0.112119	-0.059169	0.014426
0.00340725	0.000117959	0.249061	0.0844843		0.964819	0.284052	0.290512	0.287282	0.202432	0.0247712	0.113602	-0.129107	-0.0139127	-0.07151	0.108548	-0.138792	-0.0151224	0.286462	0.0558598	0.171161	-0.190522	0.200306	0.00489195	-0.307627	-0.0816301	-0.194628	0.246266	0.161427	0.203847	-0.247076	0.136814	-0.055131	-0.250377	0.00123958	-0.124569	-0.131969	0.204721	0.0363763	-0.0839738	0.157301	0.0366634	0.0309153	0.122367	0.0766409	0.00990934	0.129818	0.0698635	-0.0672757	-0.0136731
0.00340796	0.000130735	0.387559	0.00328519		1.01308	0.244839	0.195961	0.2204	0.267478	-0.0498989	0.108789	-0.0566566	0.096701	0.0200222	0.109839	-0.264863	-0.0775125	0.325959	-0.0017511	0.162104	-0.102768	0.217835	0.0575337	-0.318504	-0.0743937	-0.196449	0.307268	0.188213	0.24774	-0.293506	0.0404063	-0.12655	-0.255252	0.088525	-0.0833635	-0.163324	0.205643	0.0211594	-0.0996669	0.112487	0.00641008	0.010348	0.101859	0.0561037	-0.0755898	0.103444	0.0139271	-0.0960374	-0.0265917
0.00340837	0.000134993	0.399374	0.11483		1.06133	0.234538	0.196938	0.215738	0.297176	-0.0741657	0.111505	-0.0702462	0.117884	0.023819	0.114565	-0.246785	-0.0661099	0.321914	-0.0603357	0.130789	-0.00679437	0.241181	0.117193	-0.25833	0.0341672	-0.112081	0.296056	0.0692558	0.182656	-0.25339	0.0931601	-0.0801151	-0.233766	0.0244094	-0.104678	-0.134264	0.159549	0.0126426	-0.110399	0.0833385	-0.0135302	-0.0152636	0.132215	0.0584757	-0.0859518	0.141371	0.0277095	-0.10738	-0.0735258
0.00340643	0.000139252	0.363176	0.922298		1.10959	0.201603	0.0850255	0.143314	0.319679	-0.0551908	0.132244	-0.100934	0.140364	0.019715	0.0656241	-0.200429	-0.0674027	0.29635	-0.0947855	0.100782	-0.0173703	0.22199	0.10231	-0.233199	0.110311	-0.0614441	0.295918	0.0860671	0.190992	-0.15745	0.042624	-0.0574129	-0.246347	0.059292	-0.0935275	-0.137988	0.0937628	-0.0221127	-0.0507766	0.127404	0.0383135	0.019901	0.136034	0.0779676	-0.100342	0.134051	0.0168543	-0.101125	-0.135258
0.00340725	0.000147769	0.542084	0.0802235		1.15785	0.126695	0.00713906	0.066917	0.317298	-0.103085	0.107106	-0.136602	0.144949	0.00417343	0.0446367	-0.166367	-0.060865	0.31725	-0.063452	0.126899	0.0019691	0.220505	0.111237	-0.259823	0.144194	-0.0578145	0.244361	0.0973668	0.170864	-0.164823	0.0726584	-0.0460821	-0.218218	0.130416	-0.0439013	-0.131916	0.127819	-0.00204832	0.041959	0.122516	0.0822376	-0.0136187	0.192846	0.0896139	-0.107611	0.141482	0.0169354	-0.0850241	-0.165108
0.00341262	0.000142899	0.342244	0.0426083		1.20611	0.0189418	0.000239402	0.00959059	0.240648	-0.042419	0.0991143	-0.122025	0.117453	-0.00228611	0.000821263	-0.179465	-0.089322	0.24392	-0.0197311	0.112094	0.0153193	0.170492	0.0929054	-0.299305	0.155447	-0.071929	0.152113	0.0872051	0.119659	-0.127424	0.00804033	-0.0596917	-0.198347	0.139191	-0.0295783	-0.124645	0.166122	0.0207386	0.069593	0.104973	0.0872832	-0.0851119	0.212237	0.0635625	-0.0706392	0.112089	0.0207247	-0.0529755	-0.197357
0.00341595	0.000138436	0.395064	0.395383		1.25437	-0.00354989	0.0442522	0.0203512	0.193606	-0.0579836	0.067811	-0.167326	0.0857969	-0.0407644	-0.0517836	-0.279435	-0.165609	0.199166	0.0294811	0.114324	0.0354448	0.0778139	0.0566294	-0.242622	0.0620155	-0.0903033	0.175313	0.0630659	0.11919	-0.125507	-0.0374218	-0.0814645	-0.135314	0.112282	-0.0115159	-0.146381	0.147428	0.000523366	0.121775	0.146954	0.134364	-0.0727304	0.172534	0.0499017	-0.0733089	0.0763717	0.00153142	-0.00371057	-0.243033
0.00342009	0.000137417	0.303133	0.493701		1.30262	-0.0782914	-0.000239402	-0.0392654	0.119662	0.00332971	0.0614961	-0.188756	0.0690893	-0.0598332	-0.121655	-0.296516	-0.209085	0.180471	0.0429306	0.111701	0.0425315	0.051464	0.0469978	-0.218223	0.111213	-0.0535051	0.159678	0.00477214	0.082225	-0.142882	-0.0801063	-0.111494	-0.0887923	0.145834	0.0285207	-0.150493	0.0728762	-0.0388085	0.13096	0.14611	0.138535	-0.0786227	0.129171	0.0252742	-0.107709	-0.00515586	-0.0564326	0.0223273	-0.227948
0.00342454	0.000137519	0.347455	0.41246		1.35088	-0.0323614	0.0479045	0.00777151	0.0512793	0.0537879	0.0525336	-0.190686	0.119243	-0.0357216	-0.14657	-0.3349	-0.240735	0.131298	0.00230446	0.0668011	0.0758742	0.0159179	0.0458961	-0.153832	0.116652	-0.01859	0.137546	-0.0279926	0.0547767	-0.0882888	-0.0676453	-0.077967	0.0329841	0.140397	0.0866907	-0.173721	0.105353	-0.034184	0.179937	0.181082	0.180509	-0.103484	0.108615	0.00256538	-0.119779	-0.000212242	-0.0599956	0.0379472	-0.179146
					1.39914	-0.00577589	0.0135166	0.00387034	0.00328911	0.0953083	0.0492987	-0.187323	0.200916	0.0067961	-0.18458	-0.347276	-0.265928	0.069794	0.0917324	0.0807632	0.0394905	0.00992339	0.024707	-0.184418	0.0601864	-0.0621157	0.118641	-0.119287	-0.000323031	-0.00703626	-0.0586141	-0.0328252	0.103839	0.136041	0.11994	-0.158502	0.103428	-0.027537	0.179297	0.17282	0.176058	-0.123017	0.0286281	-0.0471947	-0.148356	-0.00612523	-0.0772406	0.00366553	-0.211346
					1.4474	-0.0611216	0.041874	-0.00962379	-0.0575913	0.0699994	0.00620408	-0.12717	0.24817	0.0605001	-0.21738	-0.321913	-0.269646	0.0197634	0.0969777	0.0583706	0.0866474	-0.0467546	0.0199464	-0.252105	0.0117785	-0.120163	0.120718	-0.134342	-0.00681163	0.0164398	-0.0181597	-0.000859951	0.189793	0.0837836	0.136788	-0.15514	0.0713259	-0.0419072	0.147068	0.131118	0.139093	-0.0224576	0.0114927	-0.00548244	-0.131611	-0.000933161	-0.0662721	-0.013335	-0.154238
					1.49566	0.0220979	0.0803304	0.0512141	-0.138712	0.0814136	-0.0286494	-0.137557	0.257212	0.0598277	-0.138649	-0.269198	-0.203923	-0.0138039	0.124953	0.0555746	0.138112	-0.101204	0.0184543	-0.250754	-0.0475067	-0.14913	0.0855407	-0.0919916	-0.00322544	0.0357253	0.0224074	0.0290664	0.227784	0.0248622	0.126323	-0.159311	0.131708	-0.0138013	0.114702	0.133357	0.12403	0.0450271	0.0455749	0.045301	-0.0735883	0.0522953	-0.0106465	0.0102376	-0.114139
					1.54391	0.0128956	0.0427948	0.0278452	-0.0643492	0.056523	-0.00391312	-0.0916935	0.312736	0.110521	-0.0855663	-0.270548	-0.178057	-0.0147578	0.153882	0.0695623	0.11697	-0.119836	-0.0014328	-0.222629	-0.119662	-0.171145	0.0632207	-0.101783	-0.0192813	0.0391092	0.0047077	0.0219085	0.234974	-0.0281335	0.10342	-0.206002	0.200828	-0.00258705	0.0956904	0.141937	0.118814	0.0507415	0.0463777	0.0485596	-0.0169691	0.0711769	0.0271039	0.0526454	-0.0546019
					1.59217	0.0396553	0.0217016	0.0306785	-0.0422095	0.0192945	-0.0114575	-0.0934981	0.220201	0.0633516	-0.0917202	-0.144171	-0.117946	-0.0395694	0.152079	0.0562549	0.136796	-0.029995	0.0534002	-0.208746	-0.156362	-0.182554	0.118564	-0.0667466	0.0259085	0.0663234	0.010125	0.0382242	0.214849	-0.0393066	0.0877711	-0.192208	0.190046	-0.00108088	0.0724353	0.231925	0.15218	0.0621689	0.0658269	0.0639979	-0.0365896	0.0556891	0.00954974	0.0246117	-0.0436269
					1.64043	0.0439641	0.0239285	0.0339463	-0.0122609	-0.021041	-0.016651	-0.00531991	0.137913	0.0662968	-0.024793	-0.152398	-0.0885953	-0.089075	0.140088	0.0255065	0.130329	-0.00970834	0.0603106	-0.178315	-0.152505	-0.16541	0.114393	-0.0523937	0.0309997	0.0694119	-0.0344582	0.0174769	0.272684	-0.0101608	0.131261	-0.254782	0.202871	-0.0259554	0.03142	0.26107	0.146245	0.0490321	0.0481125	0.0485723	-0.00530166	0.00223392	-0.00153387	0.0270744	-0.0338062
					1.68869	0.0910344	0.096027	0.0935307	0.0562573	-0.00540961	0.0254239	0.05741	0.190839	0.124124	-0.0493576	-0.100352	-0.0748548	-0.0832525	0.0523407	-0.0154559	0.140747	-0.023933	0.0584071	-0.120105	-0.170506	-0.145306	0.0600209	0.0554159	0.0577184	0.0317204	-0.0456197	-0.00694966	0.233806	0.00448032	0.119143	-0.253018	0.187429	-0.0327946	-0.0312397	0.256375	0.112568	-0.0462291	0.0534158	0.00359335	0.0208571	-0.0224846	-0.000813756	-0.0163483	0.00470948
					1.73695	0.0936692	0.0547161	0.0741926	0.0867686	0.0195684	0.0531685	0.117131	0.235017	0.176074	-0.0104165	-0.0709816	-0.0406991	-0.0682165	-0.0315933	-0.0499049	0.0962446	-0.0166574	0.0397936	-0.116939	-0.182073	-0.149506	0.149474	0.117527	0.133501	0.0734755	-0.0174438	0.0280159	0.16896	-0.0763878	0.0462863	-0.226739	0.121234	-0.0527524	-0.0915252	0.228599	0.068537	0.00915949	-0.00963719	-0.000238847	0.0507293	-0.0675223	-0.0083965	-0.0261309	0.0723544
					1.7852	0.106416	0.0330175	0.0697166	0.0996805	0.0524084	0.0760445	0.0981975	0.206409	0.152303	0.036185	-0.0657598	-0.0147874	-0.0964306	-0.0183324	-0.0573815	0.120335	0.0225925	0.0714638	-0.159787	-0.0708563	-0.115321	0.118722	0.0902744	0.104498	0.0934954	-0.0237164	0.0348895	0.152699	-0.0914607	0.0306191	-0.236715	0.0836664	-0.0765241	-0.194225	0.220349	0.0130622	0.0207663	-0.0237798	-0.00150675	-0.000657293	-0.0322508	-0.0164541	-0.0381736	0.102301
					1.83346	0.0623283	-0.0254217	0.0184533	0.0283626	0.0539172	0.0411399	0.132668	0.151399	0.142033	0.0891736	-0.0832068	0.00298339	-0.0759371	-0.0213597	-0.0486484	0.0966447	0.030228	0.0634363	-0.182156	-0.0701952	-0.126176	0.20111	0.130108	0.165609	-0.015011	-0.036887	-0.025949	0.0912607	-0.104297	-0.0065184	-0.245751	0.054125	-0.0958128	-0.231922	0.231848	-3.73125e-05	-0.0293108	-0.0309486	-0.0301297	0.00453227	-0.0260017	-0.0107347	-0.142988	0.0801958
					1.88172	0.0360785	-0.0267886	0.00464497	-0.0275863	0.0388618	0.00563772	0.08164	0.194032	0.137836	0.169772	-0.0440452	0.0628635	0.00394465	-0.0627626	-0.029409	0.0755269	0.110926	0.0932266	-0.19315	-0.0297652	-0.111457	0.186582	0.1568	0.171691	-0.0132709	-0.0327165	-0.0229937	0.00184797	-0.0746334	-0.0363927	-0.20293	0.0529273	-0.0750014	-0.266086	0.216677	-0.0247044	-0.0240357	-0.0842502	-0.054143	0.0624113	0.00700791	0.0347096	-0.133105	0.07113
					1.92998	0.0519825	0.00272217	0.0273523	0.0251302	0.00989007	0.0175101	0.0168987	0.118735	0.067817	0.204469	0.0268346	0.115652	-0.00394465	-0.00230413	-0.00312439	0.0352699	0.12711	0.08119	-0.221767	-0.0576705	-0.139719	0.119715	0.103035	0.111375	0.02343	0.00938846	0.0164092	-0.0376844	-0.124072	-0.080878	-0.162805	0.0520483	-0.0553785	-0.214581	0.178258	-0.0181614	-0.0312774	-0.0997986	-0.065538	0.080561	0.0149614	0.0477612	-0.0823619	0.000692565
					1.97824	0.0294266	0.0114713	0.020449	0.0395172	0.052655	0.0460861	-0.0193147	0.140285	0.0604849	0.162746	-0.0240143	0.0693656	0.00645865	-0.060901	-0.0272212	-0.0714491	0.121241	0.0248961	-0.207659	-0.00181701	-0.104738	0.12152	0.190228	0.155874	0.00703626	0.0204401	0.0137382	-0.0479664	-0.0557889	-0.0518777	-0.106768	0.0691247	-0.0188218	-0.148016	0.12098	-0.0135182	-0.0756117	-0.122214	-0.098913	0.0803842	0.000212242	0.0402982	-0.019209	-0.0257415
					2.02649	0.0535071	0.0404992	0.0470032	0.0280812	0.0400771	0.0340791	-0.0557504	0.149916	0.0470829	0.14211	-0.00426432	0.0689228	0.0163768	-0.0466161	-0.0151196	-0.0893555	0.112497	0.0115708	-0.245294	-0.0168167	-0.131055	0.134547	0.211411	0.172979	-0.0408267	0.0141271	-0.0133498	-0.080034	-0.0315757	-0.0558049	-0.0630568	0.106925	0.021934	-0.0685212	-0.00773701	-0.0381291	-0.0853083	-0.132036	-0.108672	0.121832	0.0107327	0.0662822	0.0161672	-0.0400305
					2.07475	-0.0678393	0.0460986	-0.0108703	0.0103399	0.0520434	0.0311916	-0.0616548	0.164411	0.0513779	0.133423	-0.0364424	0.0484905	-0.0279261	0.0106926	-0.00861676	-0.146906	0.0903941	-0.0282559	-0.26113	0.0742251	-0.0934525	0.0684143	0.12967	0.099042	-0.0622967	-0.0140968	-0.0381967	-0.123528	-0.0830653	-0.103297	-0.0938256	0.108054	0.00711416	-0.0778205	-0.055278	-0.0665493	-0.0966432	-0.197488	-0.147065	0.139427	-0.00675988	0.0663338	0.0655125	-0.0378692
					2.12301	-0.0243702	0.0205999	-0.00188514	0.0140715	0.0334029	0.0237372	-0.123794	0.0752197	-0.0242871	0.0646105	-0.0214432	0.0215837	-0.0333946	0.0590069	0.0128061	-0.21622	0.0372541	-0.0894827	-0.162236	0.0547671	-0.0537346	-0.00332905	0.112852	0.0547613	-0.0741708	-0.0294267	-0.0517988	-0.145477	-0.120102	-0.132789	-0.101592	0.0265799	-0.0375061	-0.0511062	-0.102338	-0.0767219	-0.069419	-0.220831	-0.145125	0.140551	-0.0467187	0.0469162	0.0628468	-0.0558849
					2.17127	-0.0425379	0.0107913	-0.0158733	-0.0330035	0.0666955	0.016846	-0.0784753	0.165259	0.0433919	-0.00156086	0.0339717	0.0162054	-0.0669616	0.0547147	-0.00612345	-0.202019	0.0701169	-0.0659509	-0.226002	0.0685558	-0.0787233	-0.00216852	0.133919	0.0658752	-0.107878	-0.0472192	-0.0775486	-0.168689	-0.0822165	-0.125453	-0.0844547	0.00500006	-0.0397273	-0.0390978	-0.157504	-0.0983008	-0.141186	-0.246751	-0.193968	0.0564997	-0.0392114	0.00864417	0.0631655	-0.0427547
					2.21953	-0.0290815	-0.0343948	-0.0317382	-0.0428972	0.0167821	-0.0130575	-0.0871431	0.210674	0.0617652	-0.123165	0.0136305	-0.0547672	-0.0977815	0.00654172	-0.0456199	-0.166067	0.0717172	-0.0471749	-0.167733	0.0375536	-0.0650897	-0.000988555	0.150254	0.0746327	-0.0446812	-0.0573089	-0.050995	-0.092979	-0.0900927	-0.0915359	-0.043391	-0.00500006	-0.0241955	-0.000560021	-0.218598	-0.109579	-0.170836	-0.24583	-0.208333	0.0205662	-0.00298731	0.00878942	0.0161567	0.00354858
					2.26778	-0.0476953	-0.0814658	-0.0645805	-0.0792368	0.0515622	-0.0138373	-0.0355358	0.247035	0.105749	-0.19507	0.0397728	-0.0776486	-0.117561	0.0744511	-0.0215548	-0.191592	0.0824546	-0.0545685	-0.147311	-0.056663	-0.101987	0.00536476	0.143237	0.0743006	0.0160301	-0.0254564	-0.00471315	-0.0586661	-0.035599	-0.0471326	-0.00122658	-0.0467501	-0.0239883	-0.0129787	-0.24868	-0.130829	-0.12475	-0.263936	-0.194343	-0.00873538	0.0121125	0.00168855	-0.0132779	0.0115421
					2.31604	-0.037334	-0.087662	-0.062498	-0.0460407	0.0149898	-0.0155255	0.0453791	0.216138	0.130758	-0.149218	0.0183169	-0.0654504	-0.136309	0.0854491	-0.0254302	-0.123953	0.0185031	-0.0527249	-0.104749	-0.0523199	-0.0785346	0.0188589	0.160467	0.0896631	0.0461153	0.0351293	0.0406223	-0.0451838	-0.0362459	-0.0407148	-0.0162735	-0.0787048	-0.0474891	0.00483362	-0.259358	-0.127262	-0.00915975	-0.257021	-0.133091	0.00685012	0.0185395	0.0126948	0.0400709	0.0673595
					2.3643	0.0074137	-0.116595	-0.0545908	-0.0586341	0.0196839	-0.0194751	0.0112344	0.153725	0.0824798	-0.183247	0.116464	-0.0333911	-0.131725	0.0994639	-0.0161307	-0.121164	-0.04868	-0.0849218	-0.00541459	0.00181701	-0.00179879	0.0357956	0.124507	0.080151	0.0542338	0.0483689	0.0513013	-0.0267871	-0.00907942	-0.0179332	0.0246097	-0.115819	-0.0456045	0.0840718	-0.241711	-0.0788196	0.0143476	-0.181673	-0.0836627	0.0419455	0.00281996	0.0223827	0.0683673	0.098255
					2.41256	0.00354962	-0.120813	-0.0586315	-0.00328911	-0.0270223	-0.0151557	0.0780354	0.127579	0.102807	-0.130451	0.129036	-0.000707544	-0.109023	0.133546	0.0122616	-0.136881	-0.0267098	-0.0817953	0.085835	0.0427237	0.0642793	0.000988555	0.102824	0.0519065	0.101809	0.0347969	0.0683032	-0.00184773	0.0441499	0.0211511	0.0107072	-0.0989141	-0.0441034	0.130683	-0.163755	-0.0165358	0.0709879	-0.145776	-0.037394	0.0122758	0.0310982	0.021687	0.0669699	0.0850295
					2.46082	-0.0199911	-0.12653	-0.0732606	-0.0233842	-0.0979138	-0.060649	0.0988682	0.0248906	0.0618794	-0.132747	0.154705	0.0109794	-0.0476103	0.138379	0.0453843	-0.040507	0.00970834	-0.0153993	0.127309	0.0893118	0.108311	-0.12595	0.0390636	-0.0434431	0.149081	0.0480213	0.0985513	-0.0207199	0.0882464	0.0337633	0.0596137	-0.0782834	-0.00933489	0.157483	-0.0743012	0.0415906	0.127579	-0.0824519	0.0225634	0.030799	0.0444469	0.037623	0.0519082	0.0286573
					2.50907	-0.022199	-0.181865	-0.102032	-0.0593434	-0.140178	-0.0997609	0.176938	-0.0496927	0.0636225	-0.0824675	0.0718251	-0.00532116	-0.049973	0.089366	0.0196965	-0.0223463	-0.0764194	-0.0493829	0.175409	0.0525726	0.113991	-0.154775	-0.0899873	-0.122381	0.152577	0.030191	0.091384	0.00772851	0.0754447	0.0415866	0.0133114	-0.0890018	-0.0378452	0.140192	-0.0857419	0.0272252	0.160715	-0.0971608	0.0317769	0.0635911	-0.00484846	0.0293713	0.0439031	0.000803418
					2.55733	-0.01915	-0.275901	-0.147525	-0.0688865	-0.139664	-0.104275	0.160507	-0.0354473	0.0625298	-0.119227	0.106073	-0.0065772	-0.0183195	0.0116368	-0.00334136	0.00365475	-0.0994454	-0.0478953	0.189697	0.0568682	0.123283	-0.17312	-0.079043	-0.126081	0.0843612	0.0558015	0.0700814	0.0282275	0.0809613	0.0545944	-0.0023371	-0.142798	-0.0725675	0.104842	0.031574	0.0682082	0.210147	-0.0686316	0.0707579	0.0654262	-0.00418133	0.0306224	-0.00908876	-0.000803599
					2.60559	-0.0595394	-0.290615	-0.175077	-0.0731336	-0.133884	-0.103509	0.171502	-0.0424076	0.0645472	-0.0588672	0.0879922	0.0145625	-0.0119752	-0.00591886	-0.00894701	0.0300114	-0.105901	-0.0379446	0.195039	0.0590192	0.127029	-0.111832	-0.111905	-0.111869	0.089033	0.10262	0.0958264	0.0174965	0.00228903	0.00989276	0.00122675	-0.114488	-0.0566308	0.04075	0.10367	0.0722102	0.317385	-0.0422396	0.137573	0.0816779	-0.0104929	0.0355925	0.00908876	-0.0146267
					2.65385	-0.00678664	-0.325634	-0.166211	-0.118697	-0.166948	-0.142822	0.129576	-0.0803253	0.0246253	-0.0734788	0.00426432	-0.0346072	0.043269	-0.0209738	0.0111476	0.0375912	-0.0623654	-0.0123871	0.10432	0.0193667	0.0618432	-0.104354	-0.181919	-0.143137	0.0460335	0.118676	0.0823549	0.103142	0.0400965	0.0716192	0.0122565	-0.0935204	-0.0406319	-0.0172329	0.129254	0.0560103	0.334921	0.00325864	0.16909	0.0189535	0.0417653	0.0303594	-0.071295	-0.0458277
					2.70211	-0.00440567	-0.303238	-0.153822	-0.15136	-0.132216	-0.141788	0.122344	-0.127792	-0.00272433	0.016892	-0.041413	-0.0122605	0.0778638	-0.0409121	0.0184758	0.0205401	-0.0700462	-0.0247531	0.0744424	-0.0651732	0.00463458	0.0102013	-0.127733	-0.0587658	0.0210664	0.110134	0.0656	0.0729208	0.0187482	0.0458345	0.0500992	-0.0189493	0.015575	-0.017683	0.144422	0.0633693	0.294963	0.0502712	0.172617	-0.0366729	0.0133292	-0.0116718	-0.140844	-0.0715364
					2.75036	0.013884	-0.220349	-0.103233	-0.101129	-0.140402	-0.120766	-0.00884046	-0.116249	-0.0625448	0.00305436	-0.0954875	-0.0462166	0.0840964	-0.0750762	0.00451009	-0.0019691	-0.0338904	-0.0179298	0.0534458	-0.115771	-0.0311624	0.0169843	-0.163583	-0.0732992	0.0429444	0.0574389	0.0501917	-0.00658828	-0.00228883	-0.00443855	0.0796325	0.0590714	0.0693519	-0.012975	0.131229	0.0591268	0.311277	0.0437917	0.177534	0.000657548	0.05421	0.0274338	-0.0683698	-0.0298743
					2.79862	0.011224	-0.163324	-0.0760499	-0.0705136	-0.142815	-0.106665	-0.0432931	-0.111943	-0.0776182	0.00156086	-0.180683	-0.0895612	0.0702549	-0.123095	-0.02642	-0.0243354	-0.0839758	-0.0541556	0.0462888	-0.190261	-0.0719862	-0.0379082	-0.188801	-0.113355	-0.0170751	0.0240029	0.00346389	0.0307262	0.0128974	0.0218118	0.0353459	0.0914079	0.0633769	0.0657243	0.0965108	0.0811175	0.271662	0.0105351	0.141099	-0.0503545	-0.0532111	-0.0517828	-0.0818316	-0.0700063
					2.84688	0.0158339	-0.149223	-0.0666944	-0.0291794	-0.0734206	-0.0513	-0.0646147	-0.0248906	-0.0447527	0.0331419	-0.254954	-0.110906	0.106747	-0.188811	-0.0410318	-0.0495097	-0.119352	-0.084431	0.0315901	-0.221551	-0.0949806	0.0308566	-0.102429	-0.0357862	-0.0496337	-0.0047075	-0.0271706	0.0611381	0.0186494	0.0398938	0.0679494	0.129037	0.0984932	0.00529752	0.077758	0.0415278	0.223511	0.00609868	0.114805	-0.0392975	-0.0416474	-0.0404724	-0.0828815	0.0100722
					2.89514	-0.0261454	-0.11904	-0.0725925	0.0283761	-0.0849977	-0.0283108	-0.0373898	-0.0280697	-0.0327297	0.0656976	-0.201338	-0.06782	0.1249	-0.17206	-0.0235803	-0.0731737	-0.163004	-0.118089	0.00541442	-0.19704	-0.0958126	0.0348084	-0.0612694	-0.0132305	-0.0405668	-0.100127	-0.0703467	0.0291823	0.0243838	0.0267831	0.028352	0.188645	0.108498	0.0318106	0.00773721	0.0197739	0.23071	-0.00325864	0.113726	-0.00640657	-0.0378463	-0.0221264	-0.0894489	0.0933543
					2.9434	-0.0839213	-0.113256	-0.0985887	0.0834106	-0.0277126	0.027849	0.0322864	-0.0435376	-0.0056256	0.03225	-0.246391	-0.107071	0.103907	-0.139145	-0.0176189	-0.141035	-0.171997	-0.156516	-0.0651078	-0.146668	-0.105888	-0.0369361	-0.0714955	-0.0542158	-0.0259773	-0.0996434	-0.0628104	0.0180664	-0.103294	-0.0426138	-0.0120522	0.195416	0.091682	-0.00815031	0.0423881	0.0171189	0.164318	-0.0138873	0.0752154	0.00629906	-0.0661164	-0.0299087	-0.105032	0.137599
					2.99165	-0.00454919	-0.113546	-0.0590478	0.0966289	-0.0302473	0.0331908	0.00884028	-0.057862	-0.0245109	0.0343173	-0.256468	-0.111076	0.0892769	-0.157136	-0.0339297	-0.180379	-0.131755	-0.156067	-0.0157522	-0.181458	-0.0986053	-0.114764	-0.0390638	-0.0769137	-0.0122621	-0.0873576	-0.0498099	-0.0340374	-0.103273	-0.0686551	-0.0557269	0.121099	0.0326863	0.000559846	0.0405382	0.020549	0.0954811	0.0215616	0.0585214	-0.00891371	-0.0645921	-0.0367529	-0.202117	0.181507
					3.03991	-0.0560646	-0.108132	-0.0820981	0.0783711	-0.00332943	0.0375208	0.0367095	0.0107209	0.0237152	0.0414969	-0.300138	-0.12932	0.0668793	-0.216803	-0.0749619	-0.185993	-0.105335	-0.145664	-0.0711694	-0.199714	-0.135442	-0.0503558	0.0679246	0.00878441	-0.0209382	-0.12116	-0.0710491	-0.0862014	-0.164078	-0.12514	-0.0393449	0.123358	0.0420064	0.00469406	-0.00191763	0.00138821	-0.0299724	0.0197517	-0.00511037	-0.0459153	-0.00375664	-0.0248359	-0.247431	0.190761
					3.08817	-0.112898	-0.0972581	-0.105078	0.0739189	-0.00100443	0.0364572	0.0425569	0.0947591	0.068658	-0.0310029	-0.319192	-0.175097	0.0353814	-0.195604	-0.0801111	-0.221694	-0.0568729	-0.139284	0.0250685	-0.177215	-0.0760731	0.0089074	0.119889	0.0643982	0.0617962	-0.118881	-0.0285422	-0.0360609	-0.111689	-0.073875	-0.10191	0.0613406	-0.0202846	-0.0166047	-0.029242	-0.0229233	-0.104661	0.00841973	-0.0481204	0.00479493	-0.0239124	-0.00955872	-0.301693	0.193267
					3.13643	-0.155472	-0.102045	-0.128758	0.131775	0.0434297	0.0876025	0.0425436	0.0874854	0.0650145	-0.0496263	-0.365559	-0.207593	0.0127135	-0.243379	-0.115333	-0.272305	-0.0659106	-0.169108	0.0689302	-0.157196	-0.044133	0.112162	0.131717	0.121939	0.097718	-0.0728377	0.0124401	-0.0606816	-0.0740905	-0.067386	-0.116382	-0.0236819	-0.070032	-0.050121	0.00923071	-0.0204451	-0.0950249	-0.0154323	-0.0552286	-0.00796242	0.00654164	-0.00071039	-0.271099	0.204893
					3.18469	-0.126113	-0.0809543	-0.103533	0.20019	0.048552	0.124371	0.0134783	0.123059	0.0682686	-0.0276987	-0.363031	-0.195365	0.0368937	-0.193891	-0.0784988	-0.288644	-0.023763	-0.156204	0.0667065	-0.0770044	-0.00514896	0.19201	0.111167	0.151588	0.123919	-0.0490513	0.0374338	-0.135666	-0.0562641	-0.0959651	-0.0894711	-0.0548059	-0.0721385	-0.0648617	-0.0397478	-0.0523048	-0.100745	-0.0694931	-0.0851189	-0.0104385	-0.00299021	-0.00671435	-0.258899	0.197442
					3.23294	-0.11323	-0.0740701	-0.0936499	0.228536	-0.0159713	0.106283	-0.0220694	0.132881	0.0554059	-0.0543964	-0.299786	-0.177091	0.0905781	-0.200429	-0.0549256	-0.348711	0.0385424	-0.155084	0.0232396	-0.0341121	-0.00543627	0.235078	0.0570993	0.146089	0.115147	-0.12505	-0.00495147	-0.118722	-0.0163206	-0.0675213	-0.0152813	-0.0615687	-0.038425	-0.020245	-0.00350025	-0.0118726	-0.1718	-0.0678436	-0.119822	0.00769212	0.00963508	0.0086636	-0.233939	0.219873
					3.2812	-0.16986	-0.119066	-0.144463	0.207267	-0.0314003	0.0879334	0.0491517	0.141013	0.0950823	0.0373944	-0.269314	-0.11596	0.0684349	-0.144657	-0.0381112	-0.375528	0.12036	-0.127584	0.081868	-0.022128	0.02987	0.23579	0.0304157	0.133103	0.137832	-0.147643	-0.00490541	-0.132639	-0.0152973	-0.0739679	0.0157957	-0.059447	-0.0218257	-0.0344758	0.0184829	-0.00799647	-0.162992	-0.0730344	-0.118013	0.0103845	-0.0271417	-0.00837862	-0.239929	0.171898
					3.32946	-0.211281	-0.188054	-0.199667	0.158857	-0.0967268	0.0310651	0.0341945	0.0977397	0.0659671	0.0044244	-0.247583	-0.121579	0.0827374	-0.195471	-0.0563668	-0.333856	0.104441	-0.114708	0.0587875	-0.0504649	0.00416133	0.265621	-0.00582251	0.129899	0.114506	-0.116803	-0.00114846	-0.214845	-0.0163202	-0.115583	0.044984	-0.0321996	0.00639219	-0.0482778	0.0341673	-0.00705524	-0.120526	-0.101853	-0.111189	-0.0117819	-0.059351	-0.0355664	-0.198253	0.129291
					3.37772	-0.184923	-0.229695	-0.207309	0.147091	-0.0956386	0.025726	-0.00261509	0.034074	0.0157295	0.0556791	-0.196916	-0.0706183	0.0696061	-0.243173	-0.0867836	-0.351718	0.0542738	-0.148722	-0.00442259	-0.0835486	-0.0439856	0.369391	-0.0662536	0.151569	0.0434443	-0.147519	-0.0520375	-0.204805	-0.036732	-0.120769	0.0047027	-0.0587625	-0.0270299	-0.150164	0.0328265	-0.0586687	-0.142402	-0.180562	-0.161482	-0.0501556	-0.110112	-0.0801339	-0.178415	0.0582572
					3.42598	-0.200495	-0.228851	-0.214673	0.0604419	-0.072387	-0.00597253	-0.0253113	0.105285	0.039987	0.00513747	-0.198084	-0.0964733	0.0733357	-0.227392	-0.0770279	-0.330727	0.151656	-0.0895354	-0.109156	-0.0498335	-0.0794949	0.408942	-0.0261641	0.191389	-0.0532884	-0.0716289	-0.0624586	-0.15941	-0.11188	-0.135645	0.0257299	-0.0291751	-0.0017226	-0.18983	0.0134236	-0.088203	-0.103041	-0.192779	-0.14791	-0.0767533	-0.139625	-0.108189	-0.15699	0.0417333
					3.47423	-0.219158	-0.089484	-0.154321	0.072005	-0.0987184	-0.0133567	-0.172542	0.0916178	-0.0404622	0.0164659	-0.256354	-0.119944	0.0850142	-0.169256	-0.0421209	-0.292683	0.19814	-0.0472714	-0.192892	-0.0772284	-0.13506	0.453443	-0.0282846	0.212579	-0.0278977	-0.0232397	-0.0255687	-0.198463	-0.19284	-0.195651	0.0597251	0.0131784	0.0364517	-0.299868	-0.0160781	-0.157973	-0.0316396	-0.143177	-0.0874082	-0.167329	-0.169226	-0.168278	-0.0852484	0.00399741
					3.52249	-0.176762	-0.0742294	-0.125495	0.0829982	-0.0844059	-0.000703871	-0.232199	0.10876	-0.06172	-0.0609299	-0.243086	-0.152008	0.0425239	-0.209199	-0.0833377	-0.267566	0.210084	-0.0287412	-0.200439	-0.0974231	-0.148931	0.433366	-0.046369	0.193499	-0.0733111	-0.0658697	-0.0695904	-0.186463	-0.164319	-0.175391	0.0961996	0.033634	0.0649168	-0.189158	-0.0846706	-0.136914	-0.00695923	-0.114079	-0.0605192	-0.251463	-0.124423	-0.187943	-0.0763144	0.0580147
					3.57075	-0.180555	-0.0552977	-0.117926	0.0705136	-0.0113219	0.0295959	-0.221181	0.193104	-0.0140385	0.0282412	-0.133172	-0.0524656	0.0294533	-0.175413	-0.0729796	-0.214361	0.23212	0.00887968	-0.116837	-0.0922844	-0.10456	0.388171	-0.0708092	0.158681	-0.0477962	-0.0837686	-0.0657824	-0.19538	-0.136483	-0.165932	0.141883	0.130948	0.136416	-0.153096	-0.0499063	-0.101501	-0.00578843	-0.0656786	-0.0357335	-0.286576	-0.145868	-0.216222	-0.00391235	0.0473304
					3.61901	-0.122357	0.050694	-0.0358317	-0.018806	0.0526402	0.0169171	-0.159138	0.233373	0.0371176	0.0682343	-0.0779954	-0.00488055	0.0172047	-0.157255	-0.0700254	-0.121422	0.281712	0.080145	-0.0260302	-0.0273676	-0.0266989	0.380908	-0.108651	0.136129	-0.117085	-0.100038	-0.108562	-0.211908	-0.0380394	-0.124974	0.185119	0.112608	0.148863	-0.0427669	-0.00205023	-0.0224086	0.0265189	-0.10619	-0.0398354	-0.2595	-0.0696513	-0.164576	0.103596	0.0789479
					3.66727	-0.131047	0.0769326	-0.0270574	-0.0119052	0.163747	0.0759207	-0.116385	0.268568	0.0760915	0.194837	-0.0314711	0.0816829	0.0703894	-0.0896804	-0.00964552	-0.0404281	0.231005	0.0952884	0.0470963	0.0654206	0.0562585	0.359438	0.0488266	0.204132	-0.108309	-0.0936163	-0.100963	-0.187287	0.097246	-0.0450207	0.209393	0.127345	0.168369	0.035181	0.0492389	0.0422099	-0.0118767	-0.109466	-0.0606716	-0.178264	-0.0489009	-0.113582	0.165395	0.132253
					3.71552	-0.0508117	0.120907	0.0350476	0.0517626	0.245227	0.148495	-0.0109863	0.284451	0.136733	0.32114	0.017292	0.169216	0.0568298	-0.0754251	-0.00929765	0.108092	0.147718	0.127905	0.10032	0.191188	0.145754	0.402865	0.260953	0.331909	-0.0780275	-0.070634	-0.0743307	-0.128089	0.126981	-0.000553802	0.248919	0.185308	0.217114	0.12659	0.0404438	0.0835169	-0.0217784	-0.0578575	-0.039818	-0.0542229	0.150894	0.0483354	0.247986	0.221697
					3.76378	-0.0843506	0.223303	0.0694763	0.044372	0.2541	0.149236	0.0860131	0.412333	0.249173	0.436961	0.125914	0.281437	0.0344912	0.046037	0.0402641	0.285669	0.149369	0.217519	0.258597	0.360022	0.30931	0.389761	0.348153	0.368957	-0.055017	-0.10493	-0.0799735	-0.0282969	0.2269	0.0993017	0.269255	0.195765	0.23251	0.256793	-0.0208929	0.11795	0.0503759	-0.0502425	6.67442e-05	0.0642196	0.251116	0.157668	0.28269	0.286089
					3.81204	0.00320241	0.338004	0.170603	0.100357	0.310818	0.205588	0.131059	0.537042	0.33405	0.509759	0.13779	0.323775	-0.00194916	0.133836	0.0659432	0.425538	0.154316	0.289927	0.331097	0.395879	0.363488	0.317628	0.45177	0.384699	-0.0481987	-0.0483371	-0.0482679	-0.0156636	0.253879	0.119108	0.247941	0.158908	0.203425	0.35711	0.127916	0.242513	0.06905	-0.0248494	0.0221003	0.227952	0.391688	0.30982	0.304899	0.327856
					3.8603	0.0202156	0.326991	0.173603	0.157484	0.32456	0.241022	0.109188	0.661248	0.385218	0.602563	0.192267	0.397415	-0.00505216	0.190088	0.0925179	0.500236	0.203894	0.352065	0.389629	0.454862	0.422246	0.320125	0.581437	0.450781	0.0488042	0.00307948	0.0259418	0.0833181	0.387345	0.235332	0.150544	0.132728	0.141636	0.464047	0.158338	0.311192	0.0350655	-0.00201389	0.0165258	0.320143	0.562091	0.441117	0.318643	0.368265
					3.90856	0.00831822	0.437151	0.222734	0.252092	0.424497	0.338295	0.22724	0.760764	0.494002	0.597602	0.322954	0.460278	-0.0570103	0.219008	0.0809987	0.550703	0.261528	0.406115	0.403046	0.537893	0.47047	0.310703	0.708585	0.509644	0.0575624	-0.0532401	0.00216112	0.224227	0.437512	0.33087	0.189091	0.145029	0.16706	0.529692	0.209268	0.36948	0.0283167	-0.0422929	-0.0069881	0.427778	0.653371	0.540575	0.455793	0.288095
					3.95681	0.0119264	0.47751	0.244718	0.348093	0.435516	0.391804	0.337097	0.820379	0.578738	0.589968	0.348332	0.46915	-0.0740494	0.269243	0.0975967	0.620191	0.305764	0.462978	0.438116	0.590063	0.514089	0.278446	0.800671	0.539559	0.226204	-0.0215963	0.102304	0.353638	0.576822	0.46523	0.168756	0.0859828	0.127369	0.575272	0.391094	0.483183	0.00143245	-0.0406114	-0.0195895	0.600598	0.73287	0.666734	0.459176	0.316237
					4.00507	0.0689499	0.496934	0.282942	0.412808	0.443194	0.428001	0.350918	0.843873	0.597396	0.596097	0.394074	0.495086	-0.0821885	0.318199	0.118005	0.71482	0.385722	0.550271	0.454759	0.555447	0.505103	0.497688	0.855208	0.676448	0.316104	0.0723009	0.194203	0.452097	0.624963	0.53853	0.227936	0.0233818	0.125659	0.648222	0.489117	0.56867	0.0469818	-0.0770764	-0.0150473	0.648032	0.835266	0.741649	0.501429	0.270126
					4.05333	0.113921	0.504859	0.30939	0.4739	0.44065	0.457275	0.361366	0.945475	0.653421	0.613064	0.463531	0.538298	-0.0517158	0.449125	0.198705	0.789614	0.50775	0.648682	0.409565	0.541805	0.475685	0.611071	0.864416	0.737744	0.413122	0.0625378	0.23783	0.634187	0.623888	0.629037	0.224656	0.0854518	0.155054	0.725413	0.567644	0.646528	0.0335429	-0.0892203	-0.0278387	0.792557	0.840998	0.816777	0.477583	0.237386
					4.10159	0.0899755	0.468439	0.279207	0.531757	0.418812	0.475284	0.379113	0.939245	0.659179	0.618666	0.442826	0.530746	-0.0414276	0.46467	0.211621	0.792421	0.608384	0.700402	0.389799	0.466862	0.428331	0.770232	0.88398	0.827106	0.492822	0.00848219	0.250652	0.752715	0.606163	0.679439	0.259578	0.0814338	0.170506	0.766248	0.602289	0.684268	0.0873089	-0.100921	-0.0068063	0.981022	0.86344	0.922231	0.489704	0.233236
					4.14985	0.0667002	0.434033	0.250366	0.519472	0.428052	0.473762	0.356552	0.921023	0.638787	0.517875	0.46207	0.489972	-0.0937934	0.441397	0.173802	0.823481	0.59099	0.707236	0.300297	0.360089	0.330193	0.864578	0.902294	0.883436	0.584433	0.0203966	0.302415	0.806981	0.587649	0.697315	0.266078	0.0940688	0.180074	0.768158	0.622699	0.695429	0.10624	-0.0555922	0.0253238	1.05782	0.846413	0.952118	0.433154	0.158613
					4.1981	0.0926075	0.445819	0.269213	0.579144	0.402192	0.490668	0.143431	0.80102	0.472225	0.464472	0.454499	0.459485	-0.0157721	0.359833	0.172031	0.773212	0.593032	0.683122	0.214598	0.334918	0.274758	0.89798	0.833157	0.865568	0.592167	0.10027	0.346218	0.814096	0.544639	0.679368	0.243081	0.145366	0.194224	0.70322	0.632761	0.66799	0.149844	-0.101743	0.0240507	1.03335	0.763995	0.898674	0.410638	0.147308
					4.24636	0.111715	0.447036	0.279375	0.665663	0.47101	0.568336	0.0764864	0.751833	0.41416	0.4254	0.35386	0.38963	0.0059275	0.348883	0.177405	0.760813	0.550505	0.655659	0.118544	0.202845	0.160694	0.899559	0.742431	0.820995	0.553875	0.101494	0.327684	0.846745	0.459477	0.653111	0.238824	0.106463	0.172644	0.600307	0.60076	0.600533	0.173296	-0.0729592	0.0501682	1.02808	0.723346	0.875711	0.419187	0.115365
					4.29462	0.0811969	0.423684	0.25244	0.619594	0.538861	0.579227	0.050232	0.677262	0.363747	0.393198	0.269327	0.331263	0.00634776	0.346804	0.176576	0.760364	0.601013	0.680689	-0.025006	0.161993	0.0684936	0.866828	0.649334	0.758081	0.578136	0.147814	0.362975	0.809329	0.338455	0.573892	0.207897	0.136949	0.172423	0.570817	0.572855	0.571836	0.227456	-0.0676972	0.0798796	1.07253	0.660951	0.86674	0.434764	0.134596
					4.34288	0.0742728	0.430665	0.252469	0.682945	0.570579	0.626762	-0.0783843	0.610069	0.265842	0.38273	0.221707	0.302218	0.0299803	0.333597	0.181789	0.756855	0.600806	0.678831	0.0237803	0.0919561	0.0578682	0.779993	0.612433	0.696213	0.527733	0.102835	0.315284	0.78249	0.355499	0.568995	0.18598	0.130744	0.158362	0.490348	0.572087	0.531218	0.23947	-0.0017443	0.118863	1.01489	0.655036	0.834962	0.454198	0.144652
					4.39114	0.0691328	0.273227	0.17118	0.705904	0.600846	0.653375	0.0158025	0.57094	0.293371	0.328959	0.246538	0.287749	0.0386447	0.294927	0.166786	0.742885	0.562142	0.652513	0.0442931	-0.0165057	0.0138937	0.678224	0.448406	0.563315	0.485831	0.0958129	0.290822	0.686305	0.353604	0.519954	0.16313	0.0602498	0.11169	0.482516	0.526529	0.504522	0.232962	0.0277947	0.130378	0.935361	0.642782	0.789071	0.456017	0.178366
					4.43939	0.0887578	0.188974	0.138866	0.659023	0.678901	0.668962	0.0043646	0.453259	0.228812	0.458005	0.223107	0.340556	0.0346647	0.338124	0.186394	0.658571	0.576239	0.617405	0.105447	0.00053088	0.0529889	0.572292	0.439373	0.505832	0.453172	0.106071	0.279622	0.619947	0.34086	0.480404	0.192056	0.0219508	0.107004	0.415791	0.49602	0.455906	0.188756	0.0465658	0.117661	0.902192	0.545403	0.723797	0.427398	0.130806
					4.48765	0.0661525	0.230268	0.14821	0.62367	0.735814	0.679742	0.0657403	0.393985	0.229863	0.540836	0.205629	0.373233	0.0375127	0.370724	0.204118	0.621947	0.562613	0.59228	0.129329	-0.000593899	0.0643676	0.613458	0.499505	0.556481	0.356258	0.0976843	0.226971	0.49194	0.363336	0.427638	0.192452	-0.0123034	0.0900745	0.427373	0.410615	0.418994	0.176616	0.0255105	0.101063	0.849714	0.588217	0.718965	0.397422	0.157267
					4.53591	0.0491598	0.136692	0.092926	0.763835	0.743664	0.75375	-0.00530709	0.315556	0.155125	0.578392	0.173594	0.375993	-0.0359827	0.307197	0.135607	0.564629	0.439414	0.502021	0.129621	0.106745	0.118183	0.692341	0.622285	0.657313	0.35223	0.0821039	0.217167	0.440456	0.343165	0.39181	0.179014	-0.0285452	0.0752345	0.408541	0.330216	0.369379	0.172262	0.0265228	0.0993926	0.808159	0.5788	0.69348	0.365478	0.285118
					4.58417	0.0891543	0.114222	0.101688	0.696794	0.687077	0.691936	0.0216807	0.339637	0.180659	0.654925	0.211133	0.433029	-0.131825	0.27845	0.0733126	0.579477	0.342162	0.460819	0.116707	0.0782734	0.0974903	0.680807	0.590005	0.635406	0.305283	0.0996742	0.202479	0.433795	0.278012	0.355904	0.0990317	-0.0902095	0.0044111	0.402655	0.15357	0.278112	0.239548	0.0392865	0.139417	0.773496	0.626169	0.699833	0.335225	0.306403
					4.63243	-0.0108006	0.0699067	0.0295531	0.653374	0.660309	0.656841	-0.0391204	0.41354	0.18721	0.647532	0.230425	0.438978	-0.101903	0.390765	0.144431	0.575153	0.306087	0.44062	0.145985	0.0689155	0.10745	0.55742	0.556202	0.556811	0.322603	0.0725906	0.197597	0.486832	0.320028	0.40343	0.0746329	-0.0642587	0.00518712	0.32652	0.0982176	0.212369	0.226661	0.0281998	0.12743	0.749572	0.618959	0.684266	0.251006	0.401696
					4.68068	0.0814759	0.0464543	0.0639651	0.621058	0.600642	0.61085	0.0178066	0.361078	0.189442	0.642228	0.229077	0.435653	-0.178605	0.387331	0.104363	0.502987	0.166547	0.334767	0.13236	-0.0236676	0.0543463	0.47409	0.683983	0.579036	0.277692	0.0434595	0.160576	0.458811	0.303994	0.381403	0.012335	-0.0367255	-0.0121953	0.252264	0.193603	0.222933	0.236815	0.0729948	0.154905	0.744238	0.646856	0.695547	0.207711	0.383461
					4.72894	-0.0155762	-0.0241359	-0.019856	0.665735	0.546772	0.606254	0.0465089	0.422248	0.234378	0.596486	0.262959	0.429722	-0.208459	0.42869	0.110116	0.453857	0.0783707	0.266114	0.0817482	-0.0029057	0.0394212	0.473346	0.737809	0.605577	0.281855	0.00924783	0.145552	0.548874	0.32709	0.437982	-0.0529101	-0.0184071	-0.0356586	0.205879	0.217457	0.211668	0.226436	0.0175088	0.121972	0.692793	0.626275	0.659534	0.132668	0.398817
					4.7772	0.00956728	0.103715	0.0566413	0.640839	0.499117	0.569978	0.157668	0.391622	0.274645	0.603096	0.325397	0.464247	-0.275143	0.398436	0.0616465	0.406019	0.0267136	0.216366	0.0453121	0.0595991	0.0524556	0.331532	0.737691	0.534611	0.204225	-0.0686216	0.0678016	0.594673	0.271487	0.43308	-0.127581	-0.022335	-0.074958	0.208128	0.237972	0.22305	0.215051	-0.0523685	0.0813412	0.663826	0.545444	0.604635	0.115522	0.392905
					4.82546	0.0183781	0.0459793	0.0321787	0.567263	0.373846	0.470555	0.171705	0.341371	0.256538	0.57342	0.193819	0.383619	-0.265506	0.365138	0.0498161	0.411087	-0.0536399	0.178724	-0.00757302	0.0369031	0.014665	0.410636	0.731853	0.571244	0.289341	-0.0515652	0.118888	0.617164	0.263247	0.440205	-0.147703	0.0328494	-0.057427	0.294747	0.270332	0.282539	0.20314	-0.0566167	0.0732615	0.600496	0.510821	0.555659	0.036358	0.43208
					4.87372	-0.0233538	0.113858	0.0452519	0.461368	0.330158	0.395763	0.100314	0.340992	0.220653	0.491844	0.252881	0.372363	-0.303422	0.441331	0.0689546	0.435	-0.0821383	0.176431	-0.0451254	0.104193	0.0295336	0.564569	0.739344	0.651956	0.311053	-0.0504806	0.130286	0.709928	0.221435	0.465682	-0.0996014	0.114239	0.007319	0.320406	0.305807	0.313107	0.205447	-0.0988541	0.0532963	0.449967	0.4313	0.440633	0.014468	0.34564
					4.92197	-0.0152383	0.121982	0.053372	0.471316	0.289801	0.380558	0.102277	0.320728	0.211503	0.450412	0.248489	0.349451	-0.234624	0.434323	0.0998495	0.386199	-0.113684	0.136258	-0.051058	0.146876	0.0479092	0.563921	0.643491	0.603706	0.343797	-0.0825047	0.130646	0.743573	0.197858	0.470715	-0.112778	0.141515	0.0143684	0.385565	0.325806	0.355686	0.216257	-0.122926	0.046665	0.49559	0.394617	0.445103	-0.0158542	0.312519
					4.97023	-0.0490288	0.160651	0.055811	0.463099	0.213339	0.338219	0.0757794	0.317302	0.196541	0.408594	0.0903564	0.249475	-0.188501	0.422137	0.116818	0.369522	-0.158469	0.105526	-0.0752884	0.115608	0.0201599	0.653935	0.621812	0.637874	0.300652	-0.0910964	0.104778	0.710115	0.19083	0.450473	-0.0374818	0.15173	0.0571239	0.385436	0.261944	0.32369	0.274618	-0.104316	0.085151	0.492787	0.385113	0.43895	-0.0414175	0.242443
					5.01849	-0.0106829	0.170196	0.0797563	0.423162	0.163956	0.293559	0.0200245	0.319757	0.169891	0.257089	0.113848	0.185468	-0.16527	0.29407	0.0644	0.341344	-0.231277	0.0550339	-0.101917	0.131431	0.0147571	0.617239	0.525919	0.571579	0.348028	-0.0955593	0.126234	0.625354	0.212314	0.418834	0.0237205	0.156263	0.089992	0.417057	0.228599	0.322828	0.242479	-0.0939992	0.0742398	0.439114	0.383389	0.411251	-0.0388816	0.21692
					5.06675	-4.57981e-05	0.1822	0.0910773	0.360712	0.17823	0.269471	-0.0465598	0.27344	0.11344	0.260623	0.0639768	0.1623	-0.0644574	0.283791	0.109667	0.282344	-0.241905	0.0202198	-0.142512	0.220144	0.0388163	0.558764	0.397791	0.478278	0.290276	-0.053917	0.11818	0.517704	0.179216	0.34846	0.0203988	0.15133	0.0858644	0.417395	0.201656	0.309526	0.241684	-0.15035	0.0456669	0.356996	0.27559	0.316293	-0.024188	0.219106
					5.11501	0.00431408	0.162392	0.0833528	0.356792	0.186392	0.271592	-0.00227772	0.303673	0.150698	0.157072	-0.0292948	0.0638885	-0.101372	0.253173	0.0759003	0.291729	-0.24498	0.0233746	-0.153018	0.186355	0.0166686	0.562583	0.352125	0.457354	0.25472	-0.102018	0.0763509	0.461397	0.12634	0.293869	0.0522066	0.12905	0.0906284	0.393214	0.279291	0.336252	0.222147	-0.124035	0.0490559	0.342947	0.266182	0.304564	0.066534	0.178065
					5.16326	0.0154252	0.16059	0.0880073	0.244301	0.190981	0.217641	-0.0116621	0.200395	0.0943663	0.177038	-0.0378166	0.0696107	-0.0580372	0.259614	0.100788	0.266176	-0.220196	0.0229903	-0.182737	0.241897	0.0295798	0.523274	0.332197	0.427736	0.265278	-0.125488	0.0698947	0.319095	0.107894	0.213495	0.0740938	0.143876	0.108985	0.349579	0.339806	0.344693	0.226727	-0.109303	0.058712	0.340219	0.231265	0.285742	0.0835786	0.130528
					5.21152	0.0487494	0.186076	0.117413	0.263013	0.164321	0.213667	-0.0370407	0.171837	0.0673981	0.219271	-0.119738	0.0497664	0.0525533	0.235423	0.143988	0.180809	-0.195871	-0.00753108	-0.0827352	0.253757	0.0855111	0.389923	0.339621	0.364772	0.244904	-0.140055	0.0524245	0.236687	0.091092	0.16389	0.0933153	0.118657	0.105986	0.370086	0.293447	0.331767	0.260507	-0.069927	0.0952899	0.153716	0.223951	0.188833	0.0224562	0.113179
					5.25978	0.0615559	0.174	0.117778	0.250105	0.145094	0.197599	0.00938773	0.11212	0.0607538	0.233177	-0.0871183	0.0730292	0.0528587	0.231159	0.142009	0.138484	-0.125697	0.00639315	-0.108735	0.186505	0.0388849	0.343209	0.204249	0.273729	0.306272	-0.122798	0.0917369	0.1212	-0.00143054	0.0598846	0.0814602	0.0479839	0.064722	0.331098	0.287967	0.309532	0.294931	-0.120749	0.087091	0.137148	0.11828	0.127714	0.0550354	0.041736
					5.30804	0.0556942	0.260971	0.158333	0.197288	0.213416	0.205352	-0.0712953	0.0436364	-0.0138295	0.309427	-0.0920191	0.108704	0.0547472	0.192737	0.123742	0.0919013	-0.028686	0.0316077	-0.0448238	0.204026	0.0796013	0.32614	0.280123	0.303132	0.265313	-0.129466	0.0679236	0.0618997	0.0386366	0.0502682	0.136454	0.0537146	0.0950841	0.377524	0.23119	0.304357	0.344871	-0.121085	0.111893	0.198298	0.0639884	0.131143	0.0518687	-0.0394462
					5.3563	0.0701124	0.32725	0.198681	0.206577	0.194865	0.200721	-0.0663626	0.105456	0.0195466	0.317927	-0.0594608	0.129233	0.0566498	0.158095	0.107372	0.143942	0.0674746	0.105708	-0.101176	0.121813	0.0103183	0.356087	0.233122	0.294604	0.227645	-0.147876	0.0398844	0.0081564	0.0344609	0.0213086	0.149627	0.0380309	0.0938291	0.40716	0.21538	0.31127	0.405726	-0.134925	0.135401	0.152425	0.110393	0.131409	0.100538	-0.0575123
					5.40455	0.0855227	0.290665	0.188094	0.24433	0.13458	0.189455	-0.121113	0.0430395	-0.0390369	0.345532	-0.0411108	0.15221	0.0184804	0.0540925	0.0362865	0.128402	0.0819417	0.105172	-0.0795639	0.148335	0.0343856	0.33587	0.21643	0.27615	0.258978	-0.151149	0.0539145	0.017015	0.0245886	0.0208018	0.172764	0.0146871	0.0937257	0.441615	0.232108	0.336861	0.491426	-0.13336	0.179033	0.167808	0.108016	0.137912	0.150508	-0.0493367
					5.45281	0.0465887	0.204919	0.125754	0.15641	0.161427	0.158919	-0.169817	0.108439	-0.0306886	0.38961	0.0168258	0.203218	0.0339555	0.0437322	0.0388438	0.107248	0.121011	0.11413	-0.0870758	0.0592019	-0.013937	0.283917	0.140087	0.212002	0.301478	-0.110898	0.0952901	0.0205277	-0.00613255	0.00719755	0.086479	-0.0389688	0.0237551	0.399793	0.177617	0.288705	0.515241	-0.0842297	0.215506	0.176968	0.132995	0.154982	0.124218	-0.0969215
					5.50107	-0.0802692	0.17848	0.0491054	0.159665	0.151903	0.155784	-0.195607	0.050293	-0.072657	0.358525	0.00102677	0.179776	0.102419	0.0282427	0.065331	0.111361	0.144421	0.127891	-0.180313	-0.021285	-0.100799	0.292226	0.171481	0.231853	0.3308	-0.126348	0.102226	0.107428	-0.0170853	0.0451712	0.107774	0.0145392	0.0611566	0.274748	0.258144	0.266446	0.5079	-0.0248243	0.241538	0.275052	0.144386	0.209719	0.0819946	-0.0824031
					5.54933	-0.0640016	0.213747	0.0748729	0.108189	0.104913	0.106551	-0.219458	0.0535926	-0.0829326	0.435786	0.0216221	0.228704	0.0319979	-0.00121925	0.0153893	0.08464	0.143013	0.113826	-0.149229	-0.0894441	-0.119337	0.444245	0.131319	0.287782	0.206603	-0.198575	0.00401392	0.0988851	-0.0182063	0.0403394	0.0200674	0.00270176	0.0113846	0.210488	0.344841	0.277664	0.509912	-0.00387802	0.253017	0.289993	0.137257	0.213625	0.0831488	-0.117771
					5.59759	-0.135772	0.235853	0.0500405	0.175168	0.0491719	0.11217	-0.271622	0.05005	-0.110786	0.374504	0.051729	0.213117	0.019559	-0.00718146	0.00618877	0.108878	0.174914	0.141896	-0.153372	-0.078192	-0.115782	0.466636	0.127415	0.297025	0.130708	-0.192464	-0.0308784	0.125829	-0.0222828	0.051773	-0.053422	0.0529357	-0.000243159	0.18379	0.354657	0.269224	0.448566	-0.0482448	0.20016	0.269074	0.129364	0.199219	0.015839	-0.038296
					5.64584	-0.0567183	0.275327	0.109304	0.171779	0.0536976	0.112738	-0.209335	-0.104199	-0.156767	0.40863	0.0777254	0.243177	-0.0102497	-0.0623009	-0.0362753	0.0589732	0.189635	0.124304	-0.20651	-0.0804626	-0.143486	0.474613	0.138515	0.306564	0.117512	-0.185932	-0.0342103	0.156026	-0.0383675	0.058829	-0.0593067	0.0815226	0.0111079	0.203173	0.244785	0.223979	0.386075	-0.0800781	0.152998	0.216135	0.0799864	0.148061	0.0890622	-0.00102549
					5.6941	-0.0908172	0.250831	0.0800071	0.126169	0.0556043	0.0908866	-0.261394	-0.0945795	-0.177987	0.361666	0.0322328	0.196949	-0.00510157	-0.0509464	-0.028024	0.0453811	0.131538	0.0884593	-0.222906	-0.155957	-0.189431	0.531073	0.0503004	0.290687	0.0483936	-0.147377	-0.0494917	0.189714	-0.0107189	0.0894977	-0.0284644	0.131568	0.0515516	0.202156	0.187798	0.194977	0.314169	-0.118017	0.098076	0.212983	0.0698921	0.141438	0.102478	0.0283237
					5.74236	-0.107082	0.298575	0.0957462	0.132157	0.0499349	0.0910458	-0.221738	-0.100843	-0.16129	0.301461	0.0887197	0.19509	0.00546709	-0.00649042	-0.000511667	0.00474105	0.125778	0.0652597	-0.248009	-0.121983	-0.184996	0.484729	0.114998	0.299864	0.0147427	-0.110415	-0.0478362	0.193837	0.00660459	0.100221	0.0460687	0.159292	0.10268	0.104263	0.204456	0.15436	0.218948	-0.139316	0.0398162	0.193992	0.0264833	0.110238	0.0879582	0.0352007
					5.79062	-0.0999432	0.248211	0.0741337	0.225606	0.0610309	0.143319	-0.142426	-0.0329445	-0.0876851	0.307531	0.0741584	0.190845	0.0137281	0.0347404	0.0242342	-0.0115259	0.0424739	0.015474	-0.22798	-0.188935	-0.208457	0.455713	0.0812242	0.268469	-0.0532794	-0.0825809	-0.0679302	0.2344	0.0289185	0.131659	-0.017771	0.124124	0.0531763	0.1951	0.151368	0.173234	0.133337	-0.173755	-0.0202091	0.2664	0.116266	0.191333	0.0756579	0.0253189
					5.83888	-0.1097	0.171591	0.0309455	0.215091	0.083288	0.14919	-0.125336	-0.00373189	-0.0645341	0.230628	0.0279198	0.129274	-0.00772282	0.0388433	0.0155602	0.00765588	0.0207159	0.0141859	-0.190001	-0.194822	-0.192411	0.57499	0.100479	0.337735	-0.0497236	-0.051949	-0.0508363	0.248009	-0.0358803	0.106064	0.00175317	0.176416	0.0890846	0.200417	0.118214	0.159315	0.115939	-0.158168	-0.0211145	0.294996	0.118172	0.206584	0.059212	0.00379069
					5.88713	-0.0821451	0.0674618	-0.00734162	0.192708	0.133766	0.163237	-0.0972887	0.0330781	-0.0321053	0.137793	0.0497638	0.0937783	-0.0066883	0.00160945	-0.00253942	-0.0164515	0.0429738	0.0132612	-0.14866	-0.209284	-0.178972	0.553005	0.13457	0.343788	0.000392175	-0.0343403	-0.0169741	0.220817	-0.0223997	0.0992084	0.0512417	0.131698	0.0914698	0.210751	0.122281	0.166516	0.063885	-0.176078	-0.0560965	0.333345	0.17478	0.254062	0.0884189	0.0465024
					5.93539	-0.0956763	0.0124444	-0.0416159	0.115275	0.143138	0.129206	-0.0805898	0.00196387	-0.039313	0.148189	-0.0144384	0.0668752	-0.0209711	0.0703372	0.0246831	-0.051181	0.0790427	0.0139309	-0.186276	-0.205869	-0.196072	0.516174	0.174522	0.345348	-0.0489817	-0.00447051	-0.0267261	0.224785	-0.0480095	0.0883878	0.00162491	0.108369	0.0549971	0.173789	0.0793082	0.126548	-0.0528348	-0.200794	-0.126815	0.307278	0.139168	0.223223	0.0289077	0.0494779
					5.98365	-0.11232	-0.0490017	-0.0806609	0.137655	0.132705	0.13518	-0.107111	0.0781878	-0.0144615	0.060034	-0.0711987	-0.00558231	-0.0831694	0.0779993	-0.00258508	-0.0807935	0.0754311	-0.00268123	-0.137548	-0.173906	-0.155727	0.503817	0.218647	0.361232	-0.0198388	0.0124388	-0.00369997	0.250752	-0.0945716	0.0780904	0.0170805	0.0747815	0.045931	0.125933	0.129978	0.127956	-0.0637898	-0.193235	-0.128512	0.287804	0.0805987	0.184201	0.0436045	0.0725976
					6.03191	-0.0711921	-0.0934294	-0.0823107	0.116029	0.156819	0.136424	-0.103258	0.053754	-0.0247519	0.116151	-0.176775	-0.0303118	-0.0706645	0.0642185	-0.00322301	-0.131813	0.0200517	-0.0558804	-0.108961	-0.166926	-0.137944	0.53589	0.27789	0.40689	-0.0146378	0.000332545	-0.00715261	0.188872	-0.183417	0.00272794	-0.0317472	0.0302883	-0.000729448	0.112175	0.0755576	0.0938665	-0.0799694	-0.187316	-0.133642	0.307019	0.0405918	0.173805	-0.00457231	0.071293
					6.08017	-0.0997739	-0.141512	-0.120643	0.180145	0.180358	0.180251	-0.118435	0.0475797	-0.0354279	0.153681	-0.217728	-0.0320235	-0.0986221	0.0176427	-0.0404897	-0.100408	0.0395942	-0.0304067	-0.0678745	-0.129037	-0.0984555	0.478916	0.23604	0.357478	-0.0134484	0.018688	0.00261978	0.221708	-0.188235	0.0167368	-0.0591259	0.0316064	-0.0137598	0.156329	0.038002	0.0971656	-0.132675	-0.243933	-0.188304	0.285986	-0.0150671	0.13546	-0.0444491	0.0975101
					6.12842	-0.0767798	-0.143399	-0.110089	0.157437	0.218953	0.188195	-0.10249	0.0037923	-0.0493488	0.117107	-0.231234	-0.0570636	-0.160675	0.0395786	-0.060548	0.00742715	0.0896072	0.0485172	-0.0439945	-0.137756	-0.0908752	0.460712	0.160071	0.310391	-0.0481761	0.0166183	-0.0157789	0.217659	-0.128576	0.0445416	-0.0544603	0.0572096	0.00137464	0.160741	0.0884951	0.124618	-0.158146	-0.321319	-0.239732	0.409272	-0.0617264	0.173773	0.0479631	0.038197
					6.17668	-0.0609813	-0.120316	-0.0906485	0.10207	0.195427	0.148748	-0.0127481	-0.00420192	-0.00847499	0.140436	-0.196042	-0.0278026	-0.169568	0.0207011	-0.0744334	0.104085	0.1412	0.122642	-0.035051	-0.126537	-0.0807942	0.412835	0.187126	0.29998	-0.0299661	-0.0307388	-0.0303524	0.186957	-0.0819115	0.0525228	-0.00853508	0.0626042	0.0270345	0.208637	0.0981456	0.153391	-0.0649915	-0.276685	-0.170838	0.380044	-0.0373165	0.171364	0.0520118	0.0583341
					6.22494	0.0129215	-0.129995	-0.0585367	0.099899	0.173885	0.136892	0.0750424	0.115798	0.0954201	0.062257	-0.169866	-0.0538043	-0.160162	0.040828	-0.059667	0.173224	0.157595	0.16541	-0.0452563	-0.0783498	-0.0618031	0.345761	0.190707	0.268234	0.0314533	-0.02054	0.00545664	0.134234	-0.0736518	0.0302911	0.0588256	0.047933	0.0533793	0.233818	0.0989912	0.166405	0.062545	-0.285429	-0.111442	0.373775	-0.00370968	0.185033	0.109544	0.0649301
					6.2732	-0.0292333	-0.129839	-0.0795362	0.0626112	0.127598	0.0951046	0.139418	0.14016	0.139789	0.085548	-0.151073	-0.0327626	-0.178993	-0.0224555	-0.100724	0.18385	0.191734	0.187792	-0.0660444	-0.0270691	-0.0465567	0.316354	0.214322	0.265338	0.15196	-0.0260093	0.0629754	0.113927	-0.0506704	0.0316285	0.0632515	-0.00418957	0.029531	0.202812	0.114759	0.158785	0.100744	-0.285059	-0.0921579	0.403937	-0.00389214	0.200023	0.108268	0.0314842
					6.32146	-0.0305631	-0.121271	-0.075917	0.0621002	0.160746	0.111423	0.170948	0.209689	0.190318	0.128776	-0.149633	-0.0104284	-0.181816	-0.0535501	-0.117683	0.224993	0.206022	0.215508	-0.144855	-0.0653728	-0.105114	0.387375	0.18144	0.284408	0.179223	-0.00749354	0.0858648	0.0755061	-0.0914849	-0.00798939	-0.00221022	-0.0609964	-0.0316033	0.158957	0.115398	0.137178	0.195386	-0.192014	0.0016864	0.382662	-0.00728697	0.187687	0.063141	0.0317632
					6.36971	-0.106395	-0.0542159	-0.0803057	0.0292952	0.0954252	0.0623602	0.164551	0.212484	0.188517	0.085435	-0.165491	-0.0400279	-0.178213	-0.0598714	-0.119042	0.227259	0.245941	0.2366	-0.206969	-0.0171669	-0.112068	0.397148	0.156909	0.277028	0.203336	-0.0625364	0.0703999	0.0415662	-0.069638	-0.0140359	0.0679748	-0.0660966	0.000939112	0.0753097	0.149602	0.112456	0.1763	-0.183646	-0.00367349	0.414505	-0.0162574	0.199124	0.082683	0.0223094
					6.41797	-0.0305537	-0.0398363	-0.035195	0.0127484	0.0784433	0.0455958	0.140436	0.230139	0.185287	0.101609	-0.104499	-0.00144482	-0.212905	-0.0484675	-0.130686	0.230501	0.22845	0.229476	-0.154596	0.0795443	-0.037526	0.36365	0.139975	0.251813	0.1425	-0.0814909	0.0305045	-0.0240593	-0.0205599	-0.0223096	0.0827463	-0.0674953	0.0076255	0.0599648	0.115273	0.0876188	0.281175	-0.148577	0.0662992	0.360101	0.00470925	0.182405	0.150488	0.0176781
					6.46623	-0.0411435	-0.0265045	-0.033824	0.0581726	-0.0194759	0.0193484	0.205256	0.140148	0.172702	0.148893	-0.0494706	0.049711	-0.251293	-0.0702121	-0.160753	0.253883	0.232689	0.243286	-0.132332	0.0907039	-0.0208141	0.265982	0.206586	0.236284	0.131024	-0.122629	0.00419713	-0.0310735	-0.0590794	-0.0450764	0.104546	-0.0345888	0.0349788	0.003432	0.0859644	0.0446982	0.319626	-0.0867951	0.116415	0.262274	0.00242092	0.132348	0.122488	0.048982
					6.51449	-0.0453279	0.00219452	-0.0215667	0.113219	0.0097896	0.0615043	0.166962	0.0796349	0.123299	0.18689	-0.13207	0.0274102	-0.264716	-0.082629	-0.173673	0.250106	0.164477	0.207291	-0.170491	0.116965	-0.0267633	0.183836	0.195622	0.189729	0.100935	-0.146058	-0.0225616	-0.0471295	-0.0163641	-0.0317468	0.124786	-0.074136	0.025325	-0.0150665	0.0371475	0.0110405	0.293879	-0.0852931	0.104293	0.240491	-0.0341827	0.103154	0.190533	0.0228082
					6.56275	-0.125334	-0.0118191	-0.0685766	0.134139	-0.0181075	0.0580155	0.089264	0.181597	0.13543	0.172429	-0.153102	0.00966354	-0.284504	-0.0997753	-0.19214	0.246954	0.103548	0.175251	-0.207354	0.145279	-0.0310377	0.0903988	0.174703	0.132551	0.0468773	-0.124617	-0.03887	-0.0445559	-0.0443355	-0.0444457	0.122123	-0.116712	0.00270554	-0.0586532	0.00356577	-0.0275437	0.293226	-0.0561824	0.118522	0.254975	-0.0561812	0.0993968	0.143245	0.0197738
					6.611	-0.0999363	-0.00404472	-0.0519905	0.158617	-0.0548682	0.0518742	0.180979	0.254487	0.217733	0.176218	-0.174729	0.000744529	-0.276886	-0.148751	-0.212818	0.193196	0.0860198	0.139608	-0.231689	0.150691	-0.0404991	0.083735	0.318698	0.201217	0.0865861	-0.130803	-0.0221083	-0.0579953	-0.145838	-0.101916	0.16859	-0.178287	-0.00484858	-0.0806219	0.00951834	-0.0355518	0.372112	0.0165375	0.194325	0.202735	-0.0500187	0.0763583	0.137645	-0.0197879
					6.65926	-0.129516	0.0235598	-0.0529779	0.176158	-0.0485996	0.0637793	0.23109	0.318258	0.274674	0.166733	-0.0965493	0.0350917	-0.255977	-0.0904469	-0.173212	0.256762	0.0217317	0.139247	-0.178776	0.149861	-0.0144573	-0.0506751	0.311626	0.130475	0.15327	-0.128448	0.0124108	0.0239086	-0.15359	-0.064841	0.186489	-0.196821	-0.00516608	-0.041949	0.022831	-0.00955903	0.466204	0.0383723	0.252288	0.163979	0.0456657	0.104823	0.145492	-0.0509546
					6.70752	-0.0862035	0.00908248	-0.0385605	0.0949095	-0.050879	0.0220152	0.29271	0.265696	0.279203	0.191332	-0.074447	0.0584424	-0.210691	-0.0974477	-0.154069	0.29609	0.102586	0.199338	-0.105805	0.12702	0.0106078	-0.0392495	0.351808	0.156279	0.221368	-0.1136	0.053884	0.0147665	-0.164813	-0.0750232	0.253751	-0.176055	0.038848	-0.0438344	0.00728949	-0.0182725	0.521153	0.0871896	0.304171	0.16023	0.0886739	0.124452	0.13951	-0.0828848
						-0.0552307	-0.0136714	-0.034451	0.110648	-0.0370632	0.0367926	0.331844	0.277172	0.304508	0.205568	-0.113627	0.0459705	-0.179954	-0.11272	-0.146337	0.30825	0.0917892	0.20002	-0.106858	0.106588	-0.000135023	-0.0871396	0.376984	0.144922	0.221843	-0.0965616	0.0626407	0.0305592	-0.110708	-0.0400743	0.326668	-0.210615	0.0580262	-0.0562357	0.0513037	-0.00246598	0.594983	0.121098	0.358041	0.165256	0.147131	0.156193	0.187631	-0.0671519
[truncated: 16 more columns]
